# Supplementary material for: PfMORC protein regulates chromatin accessibility and transcriptional repression in the human malaria parasite, Plasmodium falciparum
Source: eLife. 2024 Dec 5;12:RP92499. doi: 10.7554/eLife.92499 (PMC11620747; doi:10.7554/eLife.92499)
Supplement: Supplementary file 2. [file elife-92499-supp2.xlsx]

## Sheet: Supplementary File_2_WGS
Supplementary File 2. Mapped Whole Genome sequencing results of PfMORC tranfectants
NCBI Sequence Read Archive with accession# PRJNA994684
Pf MORC KD																								Pf MORC-HA
seqnames	start	end	width	strand	REF	QUAL	varAllele	CDSLOC.start	CDSLOC.end	CDSLOC.width	PROTEINLOC	GENEID	ANNOTATION	CONSEQUENCE	REFCODON	VARCODON	REFAA	VARAA	Variant found in inducible line G3?	Variant found in HA-tagged line E2?	Variant found in HA-tagged line F6?			Variants found in one of two samples
Pf3D7_01_v3	152195	152195	1	-	T	2452.48	GATGATTATACAAATAAATGTAATCAATATAATGATA	583	583	1	195	PF3D7_0103400	zinc-carboxypeptidase, putative	nonsynonymous	AAT	GATGATTATACAAATAAATGTAATCAATATAATGATAAT	N	DDYTNKCNQYNDN	0	0	1
Pf3D7_01_v3	266429	266429	1	-	A	392.87	A	2745	2745	1	915	PF3D7_0106300	calcium-transporting ATPase	synonymous	GGT	GGA	G	G	0	0	1			seqnames	start	end	width	strand	REF	QUAL	varAllele	CDSLOC.start	CDSLOC.end	CDSLOC.width	PROTEINLOC	GENEID	ANNOTATION	CONSEQUENCE	REFCODON	VARCODON	REFAA	VARAA	Variant found in NF54 control?	Variant found in MORC sample?
Pf3D7_01_v3	275488	275488	1	+	G	3617.48	GATAATAAAAATGGTGTTCATGAAAATAAAAATGGTGTTCATGATA	1174	1174	1	392	PF3D7_0106500	conserved Plasmodium protein, unknown function	nonsynonymous	GAT	GATAATAAAAATGGTGTTCATGAAAATAAAAATGGTGTTCATGATAAT	D	DNKNGVHENKNGVHDN	1	0	0			Pf3D7_02_v3	30979	30979	1	+	G	39.63	GGAT	4947	4947	1	1649	PF3D7_0200100	erythrocyte membrane protein 1, PfEMP1	nonsynonymous	GAG	GAGGAT	E	ED	0	1
Pf3D7_01_v3	318038	318038	1	+	A	359.31	C	3421	3421	1	1141	PF3D7_0107600	eukaryotic translation initiation factor 2-alpha kinase 2, putative	nonsynonymous	AAT	CAT	N	H	0	1	0			Pf3D7_02_v3	254506	254506	1	+	T	792.63	TA	1266	1266	1	422	PF3D7_0206300	pentafunctional AROM polypeptide, putative, pseudogene	frameshift	AAT	AATA			1	0
Pf3D7_01_v3	555133	555135	3	-	GTA	64.9	C	305	307	3	102:103	PF3D7_0114400	erythrocyte membrane protein 1 (PfEMP1), exon 2, pseudogene	frameshift	ATACAC	ACAC			0	1	0			Pf3D7_02_v3	257350	257353	4	+	GATA	8811.63	G	4108	4111	4	1370:1371	PF3D7_0206300	pentafunctional AROM polypeptide, putative, pseudogene	nonsynonymous	GATAAT	GAT	DN	D	1	0
Pf3D7_02_v3	122482	122482	1	+	T	1983.48	TGACAAAGAAAAAGACAAAGAAGATGACAAAGAAAAATACAAAGAAGATGACAAAGAAGATGACAAAGAAGAC	1959	1959	1	653	PF3D7_0202400	translation-enhancing factor	nonsynonymous	GAT	GATGACAAAGAAAAAGACAAAGAAGATGACAAAGAAAAATACAAAGAAGATGACAAAGAAGATGACAAAGAAGAC	D	DDKEKDKEDDKEKYKEDDKEDDKED	1	0	0			Pf3D7_04_v3	262010	262019	10	-	TATTATTATC	2976.59	A	1255	1264	10	c(419, 422)	PF3D7_0404700	dipeptidyl aminopeptidase 3	nonsynonymous	GATAATAATAAT	AAT	DNNN	N	1	0
Pf3D7_02_v3	414036	414087	52	-	CATCATCATATATGTTTTTATCACCATTTATGTTATCATCACCATTTATGTT	3022.44	G	7051	7102	52	c(2351, 2368)	PF3D7_0210200	conserved Plasmodium protein, unknown function	nonsynonymous	AACATAAATGGTGATGATAACATAAATGGTGATAAAAACATATATGATGATGAT	GAT	NINGDDNINGDKNIYDDD	D	1	0	0			Pf3D7_04_v3	355583	355583	1	-	T	3170.63	GAAAAAAATGAAAATGAAAAAAAAGACGAAAATGATA	3670	3670	1	1224	PF3D7_0406900	conserved Plasmodium protein, unknown function	nonsynonymous	AAT	GAAAAAAATGAAAATGAAAAAAAAGACGAAAATGATAAT	N	EKNENEKKDENDN	1	0
Pf3D7_02_v3	612205	612206	2	+	CA	56.87	C	1395	1396	2	465:466	PF3D7_0214900	rhoptry neck protein 6	frameshift	AACAAA	AACAA			0	0	1			Pf3D7_06_v3	599380	599380	1	-	C	8076.63	AATG	1138	1138	1	380	PF3D7_0614300	major facilitator superfamily-related transporter, putative	nonsynonymous	GAC	AATGAC	D	ND	1	0
Pf3D7_02_v3	745503	745503	1	-	A	45.9	AT	210	210	1	70	PF3D7_0218200	SUZ domain-containing protein, putative	frameshift	AAT	AAAT			0	1	0			Pf3D7_07_v3	1301315	1301315	1	+	G	8650.59	C	3857	3857	1	1286	PF3D7_0730300	AP2 domain transcription factor AP2-L, putative	nonsynonymous	CGA	CCA	R	P	1	0
Pf3D7_03_v3	88891	88891	1	-	C	5322.44	A	214	214	1	72	PF3D7_0301500	Plasmodium exported protein, unknown function	nonsynonymous	GAA	AAA	E	K	1	0	0			Pf3D7_09_v3	1379633	1379633	1	+	A	38553.6	T	1681	1681	1	561	PF3D7_0935400	gametocyte development protein 1	nonsense	AAA	TAA	K	*	0	1
Pf3D7_03_v3	654358	654359	2	-	AT	49.87	T	2889	2890	2	963:964	PF3D7_0316200	conserved Plasmodium protein, unknown function	frameshift	AAATCA	AATCA			0	1	0			Pf3D7_10_v3	1437030	1437030	1	+	A	125.43	G	715	715	1	239	PF3D7_1036400	liver stage antigen 1	nonsynonymous	ACT	GCT	T	A	1	0
Pf3D7_03_v3	755502	755502	1	+	C	4128.48	CACATCACCAAAATATTCACCA	7038	7038	1	2346	PF3D7_0318200	DNA-directed RNA polymerase II subunit RPB1	nonsynonymous	CCC	CCCACATCACCAAAATATTCACCA	P	PTSPKYSP	1	0	0			Pf3D7_10_v3	1437032	1437032	1	+	T	125.43	A	717	717	1	239	PF3D7_1036400	liver stage antigen 1	synonymous	ACT	ACA	T	T	1	0
Pf3D7_04_v3	677766	677766	1	-	A	4407.48	AT	1373	1373	1	458	PF3D7_0415200	conserved Plasmodium protein, unknown function	frameshift	ATA	AATA			1	0	0			Pf3D7_10_v3	1437050	1437050	1	+	T	342.43	A	735	735	1	245	PF3D7_1036400	liver stage antigen 1	nonsynonymous	CAT	CAA	H	Q	1	0
Pf3D7_04_v3	813586	813587	2	-	CT	67.49	G	1056	1057	2	352:353	PF3D7_0418100	protein SOC1, putative	frameshift	AAAGGA	AAGGA			1	0	0			Pf3D7_10_v3	1437149	1437149	1	+	G	37.43	A	834	834	1	278	PF3D7_1036400	liver stage antigen 1	synonymous	TTG	TTA	L	L	1	0
Pf3D7_04_v3	975983	975983	1	-	T	434.44	C	609	609	1	203	PF3D7_0421300	erythrocyte membrane protein 1, PfEMP1	nonsynonymous	AGA	AGC	R	S	1	0	0			Pf3D7_10_v3	1437456	1437456	1	+	C	1735.59	A	1141	1141	1	381	PF3D7_1036400	liver stage antigen 1	nonsynonymous	CAA	AAA	Q	K	0	1
Pf3D7_04_v3	975985	975985	1	-	T	434.44	C	607	607	1	203	PF3D7_0421300	erythrocyte membrane protein 1, PfEMP1	synonymous	AGA	CGA	R	R	1	0	0			Pf3D7_10_v3	1620084	1620084	1	+	C	344.59	A	821	821	1	274	PF3D7_1040600	rifin	nonsynonymous	GCA	GAA	A	E	1	0
Pf3D7_04_v3	975986	975986	1	-	G	434.44	T	606	606	1	202	PF3D7_0421300	erythrocyte membrane protein 1, PfEMP1	synonymous	GTC	GTT	V	V	1	0	0			Pf3D7_11_v3	1208122	1208122	1	-	C	227.63	ATAG	1466	1466	1	489	PF3D7_1131400	conserved Plasmodium protein, unknown function	nonsynonymous	AGT	AATAGT	S	NS	1	0
Pf3D7_04_v3	975988	975988	1	-	C	434.44	A	604	604	1	202	PF3D7_0421300	erythrocyte membrane protein 1, PfEMP1	nonsynonymous	GTC	ATC	V	I	1	0	0			Pf3D7_12_v3	1015194	1015195	2	-	AT	541.59	T	2654	2655	2	885	PF3D7_1225000	conserved Plasmodium protein, unknown function	frameshift	AAT	AT			1	0
Pf3D7_04_v3	976004	976004	1	-	A	860.44	A	588	588	1	196	PF3D7_0421300	erythrocyte membrane protein 1, PfEMP1	synonymous	GCT	GCA	A	A	1	0	0			Pf3D7_12_v3	1138983	1138984	2	+	GA	63.63	G	376	377	2	126	PF3D7_1227900	RNA pseudouridylate synthase, putative	frameshift	GAA	GA			1	0
Pf3D7_04_v3	1014837	1014837	1	-	T	129.57	G	2411	2411	1	804	PF3D7_0422200	erythrocyte membrane-associated antigen	nonsynonymous	AAA	AGA	K	R	0	0	1			Pf3D7_12_v3	1315345	1315348	4	+	AAAC	7468.59	A	650	653	4	217:218	PF3D7_1231800	asparagine-rich protein, putative	nonsynonymous	AAAACC	AAC	KT	N	1	0
Pf3D7_05_v3	44821	44839	19	-	TACTTCTTCTTTTTCTTTA	223.87	A	2793	2811	19	c(931, 937)	PF3D7_0500800	mature parasite-infected erythrocyte surface antigen	nonsynonymous	GTTAAAGAAAAAGAAGAAGTA	GTA	VKEKEEV	V	0	0	1			Pf3D7_12_v3	1908160	1908160	1	+	A	2195.43	T	12	12	1	4	PF3D7_1245800	epsin-like protein, putative	nonsynonymous	TTA	TTT	L	F	1	0
Pf3D7_05_v3	78107	78107	1	+	C	3871.98	CAACACAAGAACCAATCTTAACACAAGAATCAACCTT	3428	3428	1	1143	PF3D7_0501400	interspersed repeat antigen	nonsynonymous	GCA	GCAACACAAGAACCAATCTTAACACAAGAATCAACCTTA	A	ATQEPILTQESTL	0	0	1			Pf3D7_12_v3	1908166	1908166	1	+	G	2195.43	A	18	18	1	6	PF3D7_1245800	epsin-like protein, putative	synonymous	AAG	AAA	K	K	1	0
Pf3D7_06_v3	123917	123918	2	+	TA	33.9	T	1284	1285	2	428:429	PF3D7_0603000	SDE2 domain-containing protein, putative	frameshift	AATAAA	AATAA			0	1	0			Pf3D7_12_v3	1908169	1908169	1	+	T	2285.47	TA	21	21	1	7	PF3D7_1245800	epsin-like protein, putative	frameshift	GTT	GTTA			1	0
Pf3D7_06_v3	125910	125919	10	-	GGTTCATATT	4252.44	C	898	907	10	c(300, 303)	PF3D7_0603100	RNA-binding protein, putative	nonsynonymous	AATATGAACCAT	CAT	NMNH	H	1	0	0			Pf3D7_12_v3	1908173	1908174	2	+	CA	2420.43	C	25	26	2	9	PF3D7_1245800	epsin-like protein, putative	frameshift	CAA	CA			1	0
Pf3D7_06_v3	571889	571913	25	+	CGACGATAATGGTGACGATAATGGT	2362.44	C	5751	5775	25	c(1917, 1925)	PF3D7_0613800	AP2 domain transcription factor, putative	nonsynonymous	GGCGACGATAATGGTGACGATAATGGT	GGC	GDDNGDDNG	G	1	0	0			Pf3D7_12_v3	1908195	1908195	1	+	T	2735.43	A	47	47	1	16	PF3D7_1245800	epsin-like protein, putative	nonsynonymous	ATT	AAT	I	N	1	0
Pf3D7_06_v3	572625	572643	19	+	GAAACAAACGAAACATATC	2096.44	G	6487	6505	19	c(2163, 2169)	PF3D7_0613800	AP2 domain transcription factor, putative	nonsynonymous	GAAACAAACGAAACATATCAA	GAA	ETNETYQ	E	1	0	0			Pf3D7_12_v3	2199180	2199180	1	+	G	439.59	A	163	163	1	55	PF3D7_1253900	Plasmodium exported protein (PHISTa), unknown function, pseudogene	nonsynonymous	GAG	AAG	E	K	1	0
Pf3D7_06_v3	834153	834154	2	-	AT	36.87	T	4725	4726	2	1575:1576	PF3D7_0619800	WD repeat-containing protein, putative	frameshift	AAATAT	AATAT			0	0	1			Pf3D7_12_v3	2199187	2199187	1	+	T	439.59	C	170	170	1	57	PF3D7_1253900	Plasmodium exported protein (PHISTa), unknown function, pseudogene	nonsynonymous	GTA	GCA	V	A	1	0
Pf3D7_07_v3	412749	412749	1	-	T	169.61	CAA	413	413	1	138	PF3D7_0709200	glutaredoxin-like protein	frameshift	AAA	ACAAA			1	0	0			Pf3D7_12_v3	2199190	2199190	1	+	A	394.59	G	173	173	1	58	PF3D7_1253900	Plasmodium exported protein (PHISTa), unknown function, pseudogene	nonsynonymous	GAA	GGA	E	G	1	0
Pf3D7_07_v3	412752	412752	1	-	T	169.57	G	410	410	1	137	PF3D7_0709200	glutaredoxin-like protein	nonsynonymous	GAT	GGT	D	G	1	0	0			Pf3D7_12_v3	2199209	2199209	1	+	G	1159.59	A	192	192	1	64	PF3D7_1253900	Plasmodium exported protein (PHISTa), unknown function, pseudogene	synonymous	AGG	AGA	R	R	1	0
Pf3D7_07_v3	412754	412754	1	-	T	123.87	C	408	408	1	136	PF3D7_0709200	glutaredoxin-like protein	nonsynonymous	AAA	AAC	K	N	1	0	0			Pf3D7_12_v3	2199233	2199233	1	+	C	167.59	T	216	216	1	72	PF3D7_1253900	Plasmodium exported protein (PHISTa), unknown function, pseudogene	synonymous	TGC	TGT	C	C	1	0
Pf3D7_07_v3	412792	412792	1	-	G	2939.44	G	370	370	1	124	PF3D7_0709200	glutaredoxin-like protein	nonsynonymous	CTT	GTT	L	V	1	0	0			Pf3D7_12_v3	2199240	2199240	1	+	C	211.59	G	223	223	1	75	PF3D7_1253900	Plasmodium exported protein (PHISTa), unknown function, pseudogene	nonsynonymous	CAT	GAT	H	D	1	0
Pf3D7_07_v3	412821	412821	1	-	C	4102.44	A	341	341	1	114	PF3D7_0709200	glutaredoxin-like protein	nonsynonymous	GGG	GAG	G	E	1	0	0			Pf3D7_13_v3	1776778	1776787	10	-	CTATTATTAT	25273.6	G	1769	1778	10	c(590, 593)	PF3D7_1344300	zinc finger protein, putative	nonsynonymous	AATAATAATAGT	AGT	NNNS	S	0	1
Pf3D7_07_v3	419971	419972	2	-	AT	47.9	T	1778	1779	2	593	PF3D7_0709300	mediator of RNA polymerase II transcription subunit 14, putative	frameshift	AAT	AT			0	0	1			Pf3D7_14_v3	723294	723294	1	+	G	6099.63	GAA	8002	8002	1	2668	PF3D7_1417400	rap guanine nucleotide exchange factor, putative, pseudogene	frameshift	GAA	GAAAA			1	0
Pf3D7_07_v3	681454	681454	1	-	G	5546.44	A	1228	1228	1	410	PF3D7_0715200	conserved Plasmodium protein, unknown function	nonsynonymous	CTA	ATA	L	I	1	0	0			Pf3D7_14_v3	1346518	1346518	1	-	A	242.63	AAAAAAAT	2477	2477	1	826	PF3D7_1433700	conserved Plasmodium protein, unknown function	frameshift	ATA	AAAAAAAATA			1	0
Pf3D7_07_v3	1094261	1094261	1	-	A	1354.48	AT	1717	1717	1	573	PF3D7_0726100	Plasmodium exported protein, unknown function	frameshift	TTC	ATTC			1	0	0			Pf3D7_14_v3	2470558	2470558	1	+	G	82.63	GATA	4468	4468	1	1490	PF3D7_1460500	conserved Plasmodium protein, unknown function	nonsynonymous	GAT	GATAAT	D	DN	1	0
Pf3D7_07_v3	1208028	1208030	3	-	ATT	34.87	T	2272	2274	3	758	PF3D7_0728100	anaphase-promoting complex subunit 1, putative	frameshift	AAT	T			0	1	0			Pf3D7_14_v3	2786308	2786308	1	-	T	8034.63	TCCATACGATGTTCCTGATTATGCTGGATACCCTTACGACGTACCTGACTACGCTGGTTCTTATCCATACGATGTACCTGATTACGCTTAA	7677	7677	1	2559	PF3D7_1468100	MORC family protein, putative	nonsynonymous	TAA	TATCCATACGATGTTCCTGATTATGCTGGATACCCTTACGACGTACCTGACTACGCTGGTTCTTATCCATACGATGTACCTGATTACGCTTAA	*	YPYDVPDYAGYPYDVPDYAGSYPYDVPDYA*	0	1
Pf3D7_08_v3	701497	701497	1	+	C	3391.48	CAATAAT	1122	1122	1	374	PF3D7_0814500	conserved protein, unknown function	nonsynonymous	AAC	AACAATAAT	N	NNN	1	0	0			Pf3D7_14_v3	2786329	2786329	1	-	G	33578.6	A	7656	7656	1	2552	PF3D7_1468100	MORC family protein, putative	synonymous	GCC	GCA	A	A	0	1
Pf3D7_09_v3	1368738	1368738	1	-	G	46.9	AC	3300	3300	1	1100	PF3D7_0935200	vacuolar protein sorting-associated protein 33, putative	frameshift	AAC	AAAC			0	0	1
Pf3D7_10_v3	1395211	1395211	1	+	G	279.57	C	373	373	1	125	PF3D7_1035200	S-antigen	nonsynonymous	GGA	CGA	G	R	0	1	0			Variants found in both samples
Pf3D7_10_v3	1438459	1438459	1	+	T	1419.44	G	2144	2144	1	715	PF3D7_1036400	liver stage antigen 1	nonsynonymous	CTT	CGT	L	R	1	0	0
Pf3D7_10_v3	1438483	1438483	1	+	G	1047.44	A	2168	2168	1	723	PF3D7_1036400	liver stage antigen 1	nonsynonymous	CGA	CAA	R	Q	1	0	0			Pf3D7_01_v3	152195	152195	1	-	T	22703.1	GATGATTATACAAATAAATGTAATCAATATAATGATA	583	583	1	195	PF3D7_0103400	zinc-carboxypeptidase, putative	nonsynonymous	AAT	GATGATTATACAAATAAATGTAATCAATATAATGATAAT	N	DDYTNKCNQYNDN	1	1
Pf3D7_10_v3	1438484	1438484	1	+	A	1009.44	G	2169	2169	1	723	PF3D7_1036400	liver stage antigen 1	synonymous	CGA	CGG	R	R	1	0	0			Pf3D7_01_v3	190317	190323	7	+	CATAATA	39097.1	C	49	55	7	c(17, 19)	PF3D7_0104300	ubiquitin carboxyl-terminal hydrolase 1, putative	nonsynonymous	CATAATAAT	CAT	HNN	H	1	1
Pf3D7_10_v3	1438490	1438490	1	+	C	636.44	A	2175	2175	1	725	PF3D7_1036400	liver stage antigen 1	nonsynonymous	AGC	AGA	S	R	1	0	0			Pf3D7_01_v3	275488	275488	1	+	G	51402.1	GATAATAAAAATGGTGTTCATGAAAATAAAAATGGTGTTCATGATA	1174	1174	1	392	PF3D7_0106500	conserved Plasmodium protein, unknown function	nonsynonymous	GAT	GATAATAAAAATGGTGTTCATGAAAATAAAAATGGTGTTCATGATAAT	D	DNKNGVHENKNGVHDN	1	1
Pf3D7_10_v3	1544327	1544327	1	+	A	166.57	G	25194	25194	1	8398	PF3D7_1038400	gametocyte-specific protein	synonymous	GAA	GAG	E	E	0	1	0			Pf3D7_01_v3	291538	291538	1	+	A	29734.1	AATGAAAAAG	1153	1153	1	385	PF3D7_0106900	2-C-methyl-D-erythritol 4-phosphate cytidylyltransferase, putative	nonsynonymous	AAT	AATGAAAAAGAT	N	NEKD	1	1
Pf3D7_10_v3	1544889	1544889	1	+	A	373.31	G	25756	25756	1	8586	PF3D7_1038400	gametocyte-specific protein	nonsynonymous	ATT	GTT	I	V	0	0	1			Pf3D7_01_v3	320629	320635	7	+	CAATAAT	58182.1	C	462	468	7	c(154, 156)	PF3D7_0107700	dolichyl-diphosphooligosaccharide--protein glycosyltransferase subunit OST3/OST6, putative	nonsynonymous	AACAATAAT	AAC	NNN	N	1	1
Pf3D7_10_v3	1613684	1613685	2	+	GA	1242.44	G	996	997	2	332:333	PF3D7_1040400	rifin	frameshift	AGGAAA	AGGAA			1	0	0			Pf3D7_01_v3	572399	572399	1	-	A	10808.1	AT	372	372	1	124	PF3D7_0114900	Plasmodium exported protein, unknown function, pseudogene	frameshift	AAT	AAAT			1	1
Pf3D7_11_v3	259979	259980	2	+	TA	37.79	T	808	809	2	270	PF3D7_1106100	ribosomal protein S15, apicoplast, putative	frameshift	TAA	TA			1	0	0			Pf3D7_02_v3	676139	676139	1	+	G	29844.1	GATA	709	709	1	237	PF3D7_0216400	vacuolar protein sorting-associated protein 45	nonsynonymous	GAT	GATAAT	D	DN	1	1
Pf3D7_11_v3	1205923	1205924	2	-	AT	37.9	T	3479	3480	2	1160	PF3D7_1131400	conserved Plasmodium protein, unknown function	frameshift	AAT	AT			0	0	1			Pf3D7_04_v3	249735	249759	25	+	GATATGAATACACATATGATCACAC	45865	G	2005	2029	25	c(669, 677)	PF3D7_0404600	conserved Plasmodium membrane protein, unknown function	nonsynonymous	GATATGAATACACATATGATCACACAT	GAT	DMNTHMITH	D	1	1
Pf3D7_11_v3	1527277	1527278	2	-	AT	43.87	T	3989	3990	2	1330	PF3D7_1138700	protein KIC5	frameshift	AAT	AT			1	0	0			Pf3D7_04_v3	250092	250098	7	+	CATAATA	47333.1	C	2362	2368	7	c(788, 790)	PF3D7_0404600	conserved Plasmodium membrane protein, unknown function	nonsynonymous	CATAATAAT	CAT	HNN	H	1	1
Pf3D7_11_v3	1673270	1673270	1	-	T	4025.44	G	734	734	1	245	PF3D7_1141800	EELM2 domain-containing protein, putative	nonsynonymous	TAT	TGT	Y	C	1	0	0			Pf3D7_04_v3	250394	250400	7	+	AACCACC	11223.1	A	2664	2670	7	c(888, 890)	PF3D7_0404600	conserved Plasmodium membrane protein, unknown function	nonsynonymous	ATAACCACC	ATA	ITT	I	1	1
Pf3D7_12_v3	284999	284999	1	-	A	2621.87	C	4304	4304	1	1435	PF3D7_1206300	conserved Plasmodium protein, unknown function	nonsynonymous	ATA	ACA	I	T	1	0	0			Pf3D7_04_v3	338977	338977	1	-	A	45675.1	GGGATAAAATAAAAAT	5078	5078	1	1693	PF3D7_0406500	NYN domain-containing protein, putative	nonsynonymous	ATG	AGGGATAAAATAAAAATG	M	RDKIKM	1	1
Pf3D7_12_v3	581324	581325	2	-	AT	37.9	T	1	2	2	1	PF3D7_1213400	kelch domain-containing protein, putative	frameshift	ATG	TG			0	0	1			Pf3D7_04_v3	340646	340646	1	-	G	2046.03	A	3409	3409	1	1137	PF3D7_0406500	NYN domain-containing protein, putative	nonsynonymous	CTT	ATT	L	I	1	1
Pf3D7_12_v3	617385	617385	1	+	T	108.51	TAAA	328	328	1	110	PF3D7_1214800	conserved Plasmodium protein, unknown function	nonsynonymous	TAA	TAAAAA	*	*K	0	1	0			Pf3D7_04_v3	340656	340656	1	-	G	1344.03	A	3399	3399	1	1133	PF3D7_0406500	NYN domain-containing protein, putative	nonsynonymous	GAC	GAA	D	E	1	1
Pf3D7_12_v3	632644	632644	1	-	A	1429.9	ATAT	368	368	1	123	PF3D7_1215400	conserved Plasmodium protein, unknown function	nonsynonymous	ATC	AATATC	I	NI	1	0	0			Pf3D7_04_v3	340662	340662	1	-	A	1026.03	A	3393	3393	1	1131	PF3D7_0406500	NYN domain-containing protein, putative	nonsynonymous	AGT	AGA	S	R	1	1
Pf3D7_12_v3	911685	911685	1	+	G	5438.44	T	4483	4483	1	1495	PF3D7_1222600	AP2 domain transcription factor AP2-G	nonsense	GGA	TGA	G	*	1	0	0			Pf3D7_04_v3	340667	340667	1	-	A	912.03	A	3388	3388	1	1130	PF3D7_0406500	NYN domain-containing protein, putative	nonsynonymous	TTT	ATT	F	I	1	1
Pf3D7_12_v3	1172227	1172228	2	-	AT	65.9	T	6959	6960	2	2320	PF3D7_1228800	WD repeat-containing protein, putative	frameshift	AAT	AT			0	1	0			Pf3D7_04_v3	340673	340673	1	-	T	778.03	C	3382	3382	1	1128	PF3D7_0406500	NYN domain-containing protein, putative	nonsynonymous	AAA	CAA	K	Q	1	1
Pf3D7_12_v3	1236705	1236705	1	+	G	50.44	GA	1642	1642	1	548	PF3D7_1230000	TBC domain-containing protein, putative	frameshift	GAA	GAAA			0	1	0			Pf3D7_04_v3	340674	340674	1	-	G	700.03	A	3381	3381	1	1127	PF3D7_0406500	NYN domain-containing protein, putative	synonymous	ATC	ATA	I	I	1	1
Pf3D7_12_v3	1248506	1248506	1	+	G	63.5	GAA	2686	2686	1	896	PF3D7_1230200	vacuolar transporter chaperone, putative, pseudogene	frameshift	GAA	GAAAA			1	0	0			Pf3D7_04_v3	340856	340898	43	-	GCGTCATTTTGTCATTTCTAAAATTTTTGATTTCTTTCTCAAT	25716	C	3157	3199	43	c(1053, 1067)	PF3D7_0406500	NYN domain-containing protein, putative	nonsynonymous	ATTGAGAAAGAAATCAAAAATTTTAGAAATGACAAAATGACGCTT	CTT	IEKEIKNFRNDKMTL	L	1	1
Pf3D7_12_v3	1507432	1507435	4	-	CATT	3060.87	G	835	838	4	279:280	PF3D7_1236100	clustered-asparagine-rich protein	nonsynonymous	AATGTT	GTT	NV	V	1	0	0			Pf3D7_04_v3	343440	343461	22	-	ACTTTTATTATCGTCAGGTTTG	25309	T	594	615	22	c(198, 205)	PF3D7_0406500	NYN domain-containing protein, putative	nonsynonymous	AGCAAACCTGACGATAATAAAAGT	AGT	SKPDDNKS	S	1	1
Pf3D7_12_v3	1709660	1709666	7	+	ACACCAG	1589.44	A	5149	5155	7	c(1717, 1719)	PF3D7_1240400	erythrocyte membrane protein 1, PfEMP1	nonsynonymous	ACACCAGCA	ACA	TPA	T	1	0	0			Pf3D7_04_v3	343605	343605	1	-	A	9319.03	A	450	450	1	150	PF3D7_0406500	NYN domain-containing protein, putative	nonsynonymous	AAT	AAA	N	K	1	1
Pf3D7_12_v3	1747992	1747993	2	-	AT	30.88	T	1	2	2	1	PF3D7_1241100	polyadenylation factor subunit 2, putative	frameshift	ATG	TG			0	0	1			Pf3D7_04_v3	355717	355717	1	-	A	33490.1	AAAAAAATGT	3536	3536	1	1179	PF3D7_0406900	conserved Plasmodium protein, unknown function	nonsynonymous	GTA	GAAAAAAATGTA	V	EKNV	1	1
Pf3D7_12_v3	2103437	2103437	1	+	A	2689.48	AAAT	321	321	1	107	PF3D7_1251600	conserved Plasmodium protein, unknown function	nonsynonymous	GTA	GTAAAT	V	VN	1	0	0			Pf3D7_04_v3	374624	374651	28	+	CAAATAATATAAATAATATAAATAATAT	37277.1	C	1586	1613	28	c(529, 538)	PF3D7_0407600	conserved Plasmodium protein, unknown function	nonsynonymous	ACAAATAATATAAATAATATAAATAATATA	ACA	TNNINNINNI	T	1	1
Pf3D7_12_v3	2143187	2143187	1	+	G	2409.48	GTAATAA	6983	6983	1	2328	PF3D7_1252400	reticulocyte binding protein homologue 3, pseudogene	nonsynonymous	AGT	AGTAATAAT	S	SNN	1	0	0			Pf3D7_04_v3	375115	375187	73	+	AATGTAAATGATGAAAATGATGAAAATGATGAAAATGATGAAAATGATGAAAATGATGAAAATGATGAAAATG	31664	A	2077	2149	73	c(693, 717)	PF3D7_0407600	conserved Plasmodium protein, unknown function	nonsynonymous	AATGTAAATGATGAAAATGATGAAAATGATGAAAATGATGAAAATGATGAAAATGATGAAAATGATGAAAATGAT	AAT	NVNDENDENDENDENDENDENDEND	N	1	1
Pf3D7_12_v3	2199180	2199180	1	+	G	78.87	A	163	163	1	55	PF3D7_1253900	Plasmodium exported protein (PHISTa), unknown function, pseudogene	nonsynonymous	GAG	AAG	E	K	0	1	0			Pf3D7_04_v3	1014837	1014837	1	-	T	1734.03	G	2411	2411	1	804	PF3D7_0422200	erythrocyte membrane-associated antigen	nonsynonymous	AAA	AGA	K	R	1	1
Pf3D7_12_v3	2199187	2199187	1	+	T	123.87	C	170	170	1	57	PF3D7_1253900	Plasmodium exported protein (PHISTa), unknown function, pseudogene	nonsynonymous	GTA	GCA	V	A	0	1	0			Pf3D7_07_v3	120131	120131	1	+	A	390.06	AAATAATAATAATAAT	4893	4893	1	1631	PF3D7_0703000	conserved Plasmodium protein, unknown function	nonsynonymous	ACA	ACAAATAATAATAATAAT	T	TNNNNN	1	1
Pf3D7_12_v3	2199190	2199190	1	+	A	123.87	G	173	173	1	58	PF3D7_1253900	Plasmodium exported protein (PHISTa), unknown function, pseudogene	nonsynonymous	GAA	GGA	E	G	0	1	0			Pf3D7_07_v3	136886	136886	1	+	T	16766.1	TAAC	1281	1281	1	427	PF3D7_0703500	erythrocyte membrane-associated antigen	nonsynonymous	AAT	AATAAC	N	NN	1	1
Pf3D7_12_v3	2199209	2199209	1	+	G	168.87	A	192	192	1	64	PF3D7_1253900	Plasmodium exported protein (PHISTa), unknown function, pseudogene	synonymous	AGG	AGA	R	R	0	1	0			Pf3D7_08_v3	701497	701497	1	+	C	50319.1	CAATAAT	1122	1122	1	374	PF3D7_0814500	conserved protein, unknown function	nonsynonymous	AAC	AACAATAAT	N	NNN	1	1
Pf3D7_12_v3	2199324	2199324	1	+	C	298.87	T	307	307	1	103	PF3D7_1253900	Plasmodium exported protein (PHISTa), unknown function, pseudogene	nonsynonymous	CAT	TAT	H	Y	0	0	1			Pf3D7_08_v3	771771	771771	1	+	T	869.06	TA	826	826	1	276	PF3D7_0816900	adenylate kinase 2	frameshift	TAA	TAAA			1	1
Pf3D7_13_v3	212098	212099	2	-	AT	36.9	T	562	563	2	188	PF3D7_1303800	conserved Plasmodium protein, unknown function	frameshift	ATT	TT			0	1	0			Pf3D7_08_v3	785496	785502	7	-	GTATTAT	41166.1	C	4115	4121	7	c(1372, 1374)	PF3D7_0817300	conserved Plasmodium protein, unknown function	nonsynonymous	AATAATACT	ACT	NNT	T	1	1
Pf3D7_13_v3	951902	951902	1	+	T	1638.48	TAAAGGA	536	536	1	179	PF3D7_1322400	conserved Plasmodium protein, unknown function	nonsynonymous	GTA	GTAAAGGAA	V	VKE	1	0	0			Pf3D7_12_v3	679357	679357	1	+	A	1385.03	G	756	756	1	252	PF3D7_1217200	multiple RNA-binding domain-containing protein 1, putative	synonymous	AAA	AAG	K	K	1	1
Pf3D7_13_v3	1683809	1683812	4	-	TGAA	6566.44	A	10158	10161	4	3386:3387	PF3D7_1342900	AP2 domain transcription factor AP2-HS	nonsynonymous	TCTTCA	TCA	SS	S	1	0	0			Pf3D7_12_v3	1248506	1248506	1	+	G	1877.06	GA	2686	2686	1	896	PF3D7_1230200	vacuolar transporter chaperone, putative, pseudogene	frameshift	GAA	GAAA			1	1
Pf3D7_13_v3	1966962	1966963	2	-	CT	108.87	G	1355	1356	2	452	PF3D7_1349000	conserved Plasmodium protein, unknown function	frameshift	AAG	AG			0	1	0			Pf3D7_13_v3	2514270	2514270	1	+	G	7314.06	GATGAGGATGATGATGAAAATGATGATA	3916	3916	1	1306	PF3D7_1362700	conserved Plasmodium protein, unknown function	nonsynonymous	GAT	GATGAGGATGATGATGAAAATGATGATAAT	D	DEDDDENDDN	1	1
Pf3D7_13_v3	2137722	2137724	3	-	CTT	78.87	G	551	553	3	184:185	PF3D7_1353300	conserved Plasmodium protein, unknown function	frameshift	AAAGAT	AGAT			0	1	0			Pf3D7_14_v3	2936817	2936817	1	-	T	6999.03	T	2732	2732	1	911	PF3D7_1471900	conserved Plasmodium protein, unknown function	nonsynonymous	AAA	ATA	K	I	1	1
Pf3D7_13_v3	2514270	2514270	1	+	G	654.9	GATGAGGATGATGATGAAAATGATGATA	3916	3916	1	1306	PF3D7_1362700	conserved Plasmodium protein, unknown function	nonsynonymous	GAT	GATGAGGATGATGATGAAAATGATGATAAT	D	DEDDDENDDN	1	0	0			Pf_M76611	772	772	1	-	T	295161	G	748	748	1	250	mal_mito_1	cytochrome c oxidase subunit 3	nonsynonymous	ATC	GTC	I	V	1	1
Pf3D7_13_v3	2566061	2566062	2	+	TA	114.87	T	1437	1438	2	479:480	PF3D7_1364000	conserved protein, unknown function	frameshift	AGTAAA	AGTAA			0	0	1
Pf3D7_14_v3	721794	721795	2	+	GA	2041.48	G	6502	6503	2	2168	PF3D7_1417400	rap guanine nucleotide exchange factor, putative, pseudogene	frameshift	GAA	GA			1	0	0
Pf3D7_14_v3	1011664	1011665	2	+	TA	93.9	T	2655	2656	2	885:886	PF3D7_1425800	conserved Plasmodium protein, unknown function	frameshift	ATTAAA	ATTAA			0	0	1
Pf3D7_14_v3	2936792	2936793	2	-	CT	47.9	G	2756	2757	2	919	PF3D7_1471900	conserved Plasmodium protein, unknown function	frameshift	AAG	AG			0	1	0
