# Supplementary material for: PfMORC protein regulates chromatin accessibility and transcriptional repression in the human malaria parasite, Plasmodium falciparum
Source: eLife. 2024 Dec 5;12:RP92499. doi: 10.7554/eLife.92499 (PMC11620747; doi:10.7554/eLife.92499)
Supplement: Supplementary file 3. — (a) Proteins identified by MudPIT analysis after MORC-HA immunoprecipitation. PfMORC (PF3D7_1468100) is highlighted in yellow and significantly purified proteins are in red. The filters used are QPROT log2 fold change >2 and Z statistic >5. Detailed protein list is provided in an additional sheet. (b) Raw data showing proteins identified by MudPIT analysis after PfMORC-HA immunoprecipitation. [file elife-92499-supp3.xlsx]

## Sheet: File_3a_proteomics
Supplementary File 3a: Proteins identified by MudPIT analysis after MORC-HA immunoprecipitation. PfMORC (PF3D7_1468100) is highlighted in yellow and significantly purified proteins are in red. The filters used are QPROT Log2 fold change > 2 and Z statistic > 5. Detailed protein list is provided in an additional sheet.
The MassIVE submission identifier is: MSV000092353
Username: MSV000092353_reviewer
Password: PfMORC
The URL for the dataset while it is still private is:
ftp://MSV000092353@massive.ucsd.edu
After publication the permanent URL to the dataset will be:
ftp://massive.ucsd.edu/MSV000092353/
		dNSAF				QPROT statistics (MORC vs. Control)					Spectral Count
Locus	Description	MORC-HA 1	MORC-HA 2	Control 1	Control 2	Log2FoldChange	Z statistic	FDR	FDRup	FDRdown	MORC-HA 1	MORC-HA 2	Control 1	Control 2
PF3D7_0907400	| transcript=PF3D7_0907400.1 | gene=PF3D7_0907400 | organism=Plasmodium_falciparum_3D7 | gene_product=ATP-dependent protease ATPase subunit ClpY | transcript_product=ATP-dependent protease ATPase subunit ClpY | location=Pf3D7_09_v3:351955-354723(-) | protein_length=922 | sequence_SO=chromosome | SO=protein_coding | is_pseudo=false	7e-05	8e-05	0	0	18.1	68.5969	0	0	0.4341	4	6	X	X
PF3D7_0935400	| transcript=PF3D7_0935400.1 | gene=PF3D7_0935400 | organism=Plasmodium_falciparum_3D7 | gene_product=gametocyte development protein 1 | transcript_product=gametocyte development protein 1 | location=Pf3D7_09_v3:1377953-1379752(+) | protein_length=599 | sequence_SO=chromosome | SO=protein_coding | is_pseudo=false	0.00022	0.00022	0	0	19.2	68.301	0	0	0.434203	8	11	X	X
PF3D7_1239200	| transcript=PF3D7_1239200.1 | gene=PF3D7_1239200 | organism=Plasmodium_falciparum_3D7 | gene_product=AP2 domain transcription factor, putative | transcript_product=AP2 domain transcription factor, putative | location=Pf3D7_12_v3:1634695-1642428(+) | protein_length=2577 | sequence_SO=chromosome | SO=protein_coding | is_pseudo=false	0.00056	0.0005	0	0	20	65.4126	0	0	0.435545	90	108	X	X
PF3D7_0218500	| transcript=PF3D7_0218500.1 | gene=PF3D7_0218500 | organism=Plasmodium_falciparum_3D7 | gene_product=small nuclear ribonucleoprotein Sm D2, putative | transcript_product=small nuclear ribonucleoprotein Sm D2, putative | location=Pf3D7_02_v3:752966-753439(+) | protein_length=101 | sequence_SO=chromosome | SO=protein_coding | is_pseudo=false	0.00032	0.00024	0	0	19.4	64.8663	0	0	0.43586	2	2	X	X
PF3D7_1314500	| transcript=PF3D7_1314500.1 | gene=PF3D7_1314500 | organism=Plasmodium_falciparum_3D7 | gene_product=transmembrane emp24 domain-containing protein, putative | transcript_product=transmembrane emp24 domain-containing protein, putative | location=Pf3D7_13_v3:622691-623715(-) | protein_length=206 | sequence_SO=chromosome | SO=protein_coding | is_pseudo=false	0.00031	0.00023	0	0	19.4	64.527	0	0	0.436059	4	4	X	X
PF3D7_1020700	| transcript=PF3D7_1020700.1 | gene=PF3D7_1020700 | organism=Plasmodium_falciparum_3D7 | gene_product=N-acetyltransferase, GNAT family, putative | transcript_product=N-acetyltransferase, GNAT family, putative | location=Pf3D7_10_v3:835292-839700(+) | protein_length=1269 | sequence_SO=chromosome | SO=protein_coding | is_pseudo=false	9e-05	9e-05	0	0	18.3	62.1731	0	0	0.437671	7	10	X	X
PF3D7_0403600	| transcript=PF3D7_0403600.1 | gene=PF3D7_0403600 | organism=Plasmodium_falciparum_3D7 | gene_product=conserved Plasmodium protein, unknown function | transcript_product=conserved Plasmodium protein, unknown function | location=Pf3D7_04_v3:197846-201208(-) | protein_length=768 | sequence_SO=chromosome | SO=protein_coding | is_pseudo=false	0.00023	0.00029	0	0	19.3	61.7028	0	0	0.438036	11	19	X	X
PF3D7_1202200	| transcript=PF3D7_1202200.1 | gene=PF3D7_1202200 | organism=Plasmodium_falciparum_3D7 | gene_product=mitochondrial phosphate carrier protein | transcript_product=mitochondrial phosphate carrier protein | location=Pf3D7_12_v3:116475-117449(-) | protein_length=324 | sequence_SO=chromosome | SO=protein_coding | is_pseudo=false	0.0001	0.00011	0	0	18.5	60.9081	0	0	0.438667	2	3	X	X
PF3D7_0624600	| transcript=PF3D7_0624600.1 | gene=PF3D7_0624600 | organism=Plasmodium_falciparum_3D7 | gene_product=SNF2 helicase, putative | transcript_product=SNF2 helicase, putative | location=Pf3D7_06_v3:999524-1007683(+) | protein_length=2719 | sequence_SO=chromosome | SO=protein_coding | is_pseudo=false	4e-05	5e-05	0	0	17.6	60.8394	0	0	0.438723	7	12	X	X
PF3D7_0910200	| transcript=PF3D7_0910200.1 | gene=PF3D7_0910200 | organism=Plasmodium_falciparum_3D7 | gene_product=conserved Plasmodium protein, unknown function | transcript_product=conserved Plasmodium protein, unknown function | location=Pf3D7_09_v3:464559-473768(+) | protein_length=3069 | sequence_SO=chromosome | SO=protein_coding | is_pseudo=false	4e-05	5e-05	0	0	17.6	60.3973	0	0	0.439084	8	12	X	X
PF3D7_1234800	| transcript=PF3D7_1234800.1 | gene=PF3D7_1234800 | organism=Plasmodium_falciparum_3D7 | gene_product=splicing factor 3B subunit 3, putative | transcript_product=splicing factor 3B subunit 3, putative | location=Pf3D7_12_v3:1452606-1457227(+) | protein_length=1329 | sequence_SO=chromosome | SO=protein_coding | is_pseudo=false	2e-05	3e-05	0	0	17.1	58.8352	0	0	0.440429	2	3	X	X
PF3D7_1249300	| transcript=PF3D7_1249300.1 | gene=PF3D7_1249300 | organism=Plasmodium_falciparum_3D7 | gene_product=protein phosphatase PPM4, putative | transcript_product=protein phosphatase PPM4, putative | location=Pf3D7_12_v3:2012643-2015726(+) | protein_length=1027 | sequence_SO=chromosome | SO=protein_coding | is_pseudo=false	0.00077	0.00122	0	0	20.7	58.284	0	0	0.440932	49	105	X	X
PF3D7_1135400	| transcript=PF3D7_1135400.1 | gene=PF3D7_1135400 | organism=Plasmodium_falciparum_3D7 | gene_product=conserved Plasmodium protein, unknown function | transcript_product=conserved Plasmodium protein, unknown function | location=Pf3D7_11_v3:1384378-1385115(-) | protein_length=245 | sequence_SO=chromosome | SO=protein_coding | is_pseudo=false	0.00013	0.00019	0	0	18.8	57.6192	0	0	0.441533	2	4	X	X
PF3D7_0627800	| transcript=PF3D7_0627800.1 | gene=PF3D7_0627800 | organism=Plasmodium_falciparum_3D7 | gene_product=acetyl-CoA synthetase, putative | transcript_product=acetyl-CoA synthetase, putative | location=Pf3D7_06_v3:1114544-1117537(-) | protein_length=997 | sequence_SO=chromosome | SO=protein_coding | is_pseudo=false	3e-05	4e-05	0	0	17.3	57.2836	0	0	0.441851	2	3	X	X
PF3D7_1409400	| transcript=PF3D7_1409400.1 | gene=PF3D7_1409400 | organism=Plasmodium_falciparum_3D7 | gene_product=conserved protein, unknown function | transcript_product=conserved protein, unknown function | location=Pf3D7_14_v3:365509-367027(-) | protein_length=262 | sequence_SO=chromosome | SO=protein_coding | is_pseudo=false	0.00037	0.00023	0	0	19.4	56.2341	0	0	0.442852	6	5	X	X
PF3D7_1008400	| transcript=PF3D7_1008400.1 | gene=PF3D7_1008400 | organism=Plasmodium_falciparum_3D7 | gene_product=26S protease regulatory subunit 4, putative | transcript_product=26S protease regulatory subunit 4, putative | location=Pf3D7_10_v3:347206-348667(-) | protein_length=448 | sequence_SO=chromosome | SO=protein_coding | is_pseudo=false	0.00022	0.00019	0	0	19.1	54.9354	0	0	0.444137	6	7	X	X
PF3D7_1408200	| transcript=PF3D7_1408200.1 | gene=PF3D7_1408200 | organism=Plasmodium_falciparum_3D7 | gene_product=AP2 domain transcription factor AP2-G2, putative | transcript_product=AP2 domain transcription factor AP2-G2, putative | location=Pf3D7_14_v3:300725-305833(-) | protein_length=1702 | sequence_SO=chromosome | SO=protein_coding | is_pseudo=false	2e-05	1e-05	0	0	16.6	52.6643	0	0	0.446565	2	2	X	X
PF3D7_0311800	| transcript=PF3D7_0311800.1 | gene=PF3D7_0311800 | organism=Plasmodium_falciparum_3D7 | gene_product=ATP synthase F0 subunit d-like protein, putative | transcript_product=ATP synthase F0 subunit d-like protein, putative | location=Pf3D7_03_v3:506655-508846(+) | protein_length=609 | sequence_SO=chromosome | SO=protein_coding | is_pseudo=false	5e-05	4e-05	0	0	17.6	51.9857	0	0	0.447336	2	2	X	X
PF3D7_1433500	| transcript=PF3D7_1433500.1 | gene=PF3D7_1433500 | organism=Plasmodium_falciparum_3D7 | gene_product=DNA topoisomerase 2 | transcript_product=DNA topoisomerase 2 | location=Pf3D7_14_v3:1332363-1337301(-) | protein_length=1472 | sequence_SO=chromosome | SO=protein_coding | is_pseudo=false	2e-05	2e-05	0	0	16.9	50.9138	0	0	0.448638	2	3	X	X
PF3D7_0903500	| transcript=PF3D7_0903500.1 | gene=PF3D7_0903500 | organism=Plasmodium_falciparum_3D7 | gene_product=nucleoporin NUP138, putative | transcript_product=nucleoporin NUP138, putative | location=Pf3D7_09_v3:162769-166923(+) | protein_length=1384 | sequence_SO=chromosome | SO=protein_coding | is_pseudo=false	4e-05	3e-05	0	0	17.2	50.9021	0	0	0.448638	3	3	X	X
PF3D7_0923000	| transcript=PF3D7_0923000.1 | gene=PF3D7_0923000 | organism=Plasmodium_falciparum_3D7 | gene_product=DNA-directed RNA polymerase II subunit RPB3, putative | transcript_product=DNA-directed RNA polymerase II subunit RPB3, putative | location=Pf3D7_09_v3:939580-940587(-) | protein_length=335 | sequence_SO=chromosome | SO=protein_coding | is_pseudo=false	0.00019	0.00028	0	0	19.2	50.5586	0	0	0.449082	4	8	X	X
PF3D7_1225200	| transcript=PF3D7_1225200.1 | gene=PF3D7_1225200 | organism=Plasmodium_falciparum_3D7 | gene_product=conserved Plasmodium protein, unknown function | transcript_product=conserved Plasmodium protein, unknown function | location=Pf3D7_12_v3:1024455-1028018(-) | protein_length=1187 | sequence_SO=chromosome | SO=protein_coding | is_pseudo=false	3e-05	2e-05	0	0	16.9	50.5553	0	0	0.449082	2	2	X	X
PF3D7_0320300	| transcript=PF3D7_0320300.1 | gene=PF3D7_0320300 | organism=Plasmodium_falciparum_3D7 | gene_product=T-complex protein 1 subunit epsilon | transcript_product=T-complex protein 1 subunit epsilon | location=Pf3D7_03_v3:845713-847320(+) | protein_length=535 | sequence_SO=chromosome | SO=protein_coding | is_pseudo=false	5e-05	4e-05	0	0	17.6	49.717	0	0	0.45015	1.5	2	X	X
PF3D7_1014100	| transcript=PF3D7_1014100.1 | gene=PF3D7_1014100 | organism=Plasmodium_falciparum_3D7 | gene_product=merozoite surface protein MSA180, putative | transcript_product=merozoite surface protein MSA180, putative | location=Pf3D7_10_v3:555160-559527(+) | protein_length=1455 | sequence_SO=chromosome | SO=protein_coding | is_pseudo=false	3e-05	5e-05	0	0	17.5	49.4106	0	0	0.450562	3	6	X	X
PF3D7_1303800	| transcript=PF3D7_1303800.1 | gene=PF3D7_1303800 | organism=Plasmodium_falciparum_3D7 | gene_product=conserved Plasmodium protein, unknown function | transcript_product=conserved Plasmodium protein, unknown function | location=Pf3D7_13_v3:184845-212660(-) | protein_length=9271 | sequence_SO=chromosome | SO=protein_coding | is_pseudo=false	0	1e-05	0	0	15.2	49.4087	0	0	0.450562	2	4	X	X
PF3D7_1428900	| transcript=PF3D7_1428900.1 | gene=PF3D7_1428900 | organism=Plasmodium_falciparum_3D7 | gene_product=conserved Plasmodium protein, unknown function | transcript_product=conserved Plasmodium protein, unknown function | location=Pf3D7_14_v3:1134854-1139191(-) | protein_length=1445 | sequence_SO=chromosome | SO=protein_coding | is_pseudo=false	2e-05	2e-05	0	0	16.7	49.3187	0	0	0.45067	2	2	X	X
PF3D7_1415300	| transcript=PF3D7_1415300.1 | gene=PF3D7_1415300 | organism=Plasmodium_falciparum_3D7 | gene_product=RNA-binding protein Nova-1, putative | transcript_product=RNA-binding protein Nova-1, putative | location=Pf3D7_14_v3:615167-616180(+) | protein_length=337 | sequence_SO=chromosome | SO=protein_coding | is_pseudo=false	0.0001	0.00021	0	0	18.7	49.0654	0	0	0.451014	2	6	X	X
PF3D7_1412500	| transcript=PF3D7_1412500.1 | gene=PF3D7_1412500 | organism=Plasmodium_falciparum_3D7 | gene_product=actin II | transcript_product=actin II | location=Pf3D7_14_v3:507360-508868(+) | protein_length=376 | sequence_SO=chromosome | SO=protein_coding | is_pseudo=false	9e-05	7e-05	0	0	18.1	47.7063	0	0	0.452841	2.1	2.2	0	0
PF3D7_0420300	| transcript=PF3D7_0420300.1 | gene=PF3D7_0420300 | organism=Plasmodium_falciparum_3D7 | gene_product=AP2 domain transcription factor, putative | transcript_product=AP2 domain transcription factor, putative | location=Pf3D7_04_v3:917990-928411(+) | protein_length=3473 | sequence_SO=chromosome | SO=protein_coding | is_pseudo=false	3e-05	4e-05	0	0	17.2	47.5192	0	0	0.453102	6	11	X	X
PF3D7_1211700	| transcript=PF3D7_1211700.1 | gene=PF3D7_1211700 | organism=Plasmodium_falciparum_3D7 | gene_product=DNA replication licensing factor MCM5, putative | transcript_product=DNA replication licensing factor MCM5, putative | location=Pf3D7_12_v3:521687-524470(+) | protein_length=758 | sequence_SO=chromosome | SO=protein_coding | is_pseudo=false	0.00015	9e-05	0	0	18.5	47.4114	0	0	0.453252	7	6	X	X
PF3D7_1455700	| transcript=PF3D7_1455700.1 | gene=PF3D7_1455700 | organism=Plasmodium_falciparum_3D7 | gene_product=conserved Plasmodium protein, unknown function | transcript_product=conserved Plasmodium protein, unknown function | location=Pf3D7_14_v3:2278701-2282162(-) | protein_length=1077 | sequence_SO=chromosome | SO=protein_coding | is_pseudo=false	0.0003	0.00027	0	0	19.5	47.2888	0	0	0.45342	20	24	X	X
PF3D7_1228800	| transcript=PF3D7_1228800.1 | gene=PF3D7_1228800 | organism=Plasmodium_falciparum_3D7 | gene_product=WD repeat-containing protein, putative | transcript_product=WD repeat-containing protein, putative | location=Pf3D7_12_v3:1169557-1179186(-) | protein_length=3209 | sequence_SO=chromosome | SO=protein_coding | is_pseudo=false	4e-05	3e-05	0	0	17.3	47.0727	0	0	0.453701	8	7	X	X
PF3D7_0110500	| transcript=PF3D7_0110500.1 | gene=PF3D7_0110500 | organism=Plasmodium_falciparum_3D7 | gene_product=bromodomain protein, putative | transcript_product=bromodomain protein, putative | location=Pf3D7_01_v3:396591-403606(+) | protein_length=2285 | sequence_SO=chromosome | SO=protein_coding | is_pseudo=false	1e-05	1e-05	0	0	16.3	46.741	0	0	0.454168	2	2	X	X
PF3D7_0410800	| transcript=PF3D7_0410800.1 | gene=PF3D7_0410800 | organism=Plasmodium_falciparum_3D7 | gene_product=conserved Plasmodium protein, unknown function | transcript_product=conserved Plasmodium protein, unknown function | location=Pf3D7_04_v3:485832-489728(+) | protein_length=1298 | sequence_SO=chromosome | SO=protein_coding | is_pseudo=false	5e-05	5e-05	0	0	17.7	45.4815	0	0	0.455874	4	5	X	X
PF3D7_0628100	| transcript=PF3D7_0628100.1 | gene=PF3D7_0628100 | organism=Plasmodium_falciparum_3D7 | gene_product=HECT-domain (ubiquitin-transferase), putative | transcript_product=HECT-domain (ubiquitin-transferase), putative | location=Pf3D7_06_v3:1122801-1153664(-) | protein_length=10287 | sequence_SO=chromosome | SO=protein_coding | is_pseudo=false	0	0	0	0	14.8	45.3197	0	0	0.456094	2	2	X	X
PF3D7_0604100	| transcript=PF3D7_0604100.1 | gene=PF3D7_0604100 | organism=Plasmodium_falciparum_3D7 | gene_product=AP2 domain transcription factor | transcript_product=AP2 domain transcription factor | location=Pf3D7_06_v3:171301-177240(-) | protein_length=1979 | sequence_SO=chromosome | SO=protein_coding | is_pseudo=false	4e-05	2e-05	0	0	17.2	45.0594	0	0	0.456441	5	4	X	X
PF3D7_0827800	| transcript=PF3D7_0827800.1 | gene=PF3D7_0827800 | organism=Plasmodium_falciparum_3D7 | gene_product=SET domain protein, putative | transcript_product=SET domain protein, putative | location=Pf3D7_08_v3:1198858-1206057(+) | protein_length=2399 | sequence_SO=chromosome | SO=protein_coding | is_pseudo=false	3e-05	2e-05	0	0	17.1	44.8781	0	0	0.456677	5	4	X	X
PF3D7_1212000	| transcript=PF3D7_1212000.1 | gene=PF3D7_1212000 | organism=Plasmodium_falciparum_3D7 | gene_product=glutathione peroxidase-like thioredoxin peroxidase | transcript_product=glutathione peroxidase-like thioredoxin peroxidase | location=Pf3D7_12_v3:534912-535915(-) | protein_length=205 | sequence_SO=chromosome | SO=protein_coding | is_pseudo=false	0.00032	0.00017	0	0	19.3	44.6757	0	0	0.456947	4	3	X	X
PF3D7_0619900	| transcript=PF3D7_0619900.1 | gene=PF3D7_0619900 | organism=Plasmodium_falciparum_3D7 | gene_product=splicing factor 3A subunit 2, putative | transcript_product=splicing factor 3A subunit 2, putative | location=Pf3D7_06_v3:840523-841224(+) | protein_length=233 | sequence_SO=chromosome | SO=protein_coding | is_pseudo=false	0.00021	0.0001	0	0	18.7	44.085	0	0	0.457713	3	2	X	X
PF3D7_1148000	| transcript=PF3D7_1148000.1 | gene=PF3D7_1148000 | organism=Plasmodium_falciparum_3D7 | gene_product=serine/threonine protein kinase, putative | transcript_product=serine/threonine protein kinase, putative | location=Pf3D7_11_v3:1909210-1913499(-) | protein_length=1429 | sequence_SO=chromosome | SO=protein_coding | is_pseudo=false	2e-05	4e-05	0	0	17.2	43.9011	0	0	0.457942	2	5	X	X
PF3D7_0708800	| transcript=PF3D7_0708800.1 | gene=PF3D7_0708800 | organism=Plasmodium_falciparum_3D7 | gene_product=heat shock protein 110 | transcript_product=heat shock protein 110 | location=Pf3D7_07_v3:395711-398332(+) | protein_length=873 | sequence_SO=chromosome | SO=protein_coding | is_pseudo=false	6e-05	0.00012	0	0	18.1	43.7769	0	0	0.4581	3	9	X	X
PF3D7_1329500	| transcript=PF3D7_1329500.1 | gene=PF3D7_1329500 | organism=Plasmodium_falciparum_3D7 | gene_product=conserved protein, unknown function | transcript_product=conserved protein, unknown function | location=Pf3D7_13_v3:1252059-1257973(+) | protein_length=1844 | sequence_SO=chromosome | SO=protein_coding | is_pseudo=false	2e-05	3e-05	0	0	17	43.3053	0	0	0.458705	2	5	X	X
PF3D7_0816600	| transcript=PF3D7_0816600.1 | gene=PF3D7_0816600 | organism=Plasmodium_falciparum_3D7 | gene_product=chaperone protein ClpB1 | transcript_product=chaperone protein ClpB1 | location=Pf3D7_08_v3:762118-765330(-) | protein_length=1070 | sequence_SO=chromosome | SO=protein_coding | is_pseudo=false	6e-05	3e-05	0	0	17.6	43.05	0	0	0.45903	4	3	X	X
PF3D7_0611400	| transcript=PF3D7_0611400.1 | gene=PF3D7_0611400 | organism=Plasmodium_falciparum_3D7 | gene_product=SWIB/MDM2 domain-containing protein | transcript_product=SWIB/MDM2 domain-containing protein | location=Pf3D7_06_v3:471658-474150(-) | protein_length=830 | sequence_SO=chromosome | SO=protein_coding | is_pseudo=false	6e-05	3e-05	0	0	17.5	40.4207	0	0	0.46214	3	2	X	X
PF3D7_0803700	| transcript=PF3D7_0803700.1 | gene=PF3D7_0803700 | organism=Plasmodium_falciparum_3D7 | gene_product=tubulin gamma chain | transcript_product=tubulin gamma chain | location=Pf3D7_08_v3:231398-232756(+) | protein_length=452 | sequence_SO=chromosome | SO=protein_coding | is_pseudo=false	0.00018	8e-05	0	0	18.5	40.4137	0	0	0.46214	5	3	X	X
PF3D7_1368400	| transcript=PF3D7_1368400.1 | gene=PF3D7_1368400 | organism=Plasmodium_falciparum_3D7 | gene_product=ribosomal protein L1, putative | transcript_product=ribosomal protein L1, putative | location=Pf3D7_13_v3:2719490-2721420(-) | protein_length=320 | sequence_SO=chromosome | SO=protein_coding | is_pseudo=false	0.0002	0.00011	0	0	18.8	40.3596	0	0	0.462202	4	3	X	X
PF3D7_1246400	| transcript=PF3D7_1246400.1 | gene=PF3D7_1246400 | organism=Plasmodium_falciparum_3D7 | gene_product=myosin A tail domain interacting protein | transcript_product=myosin A tail domain interacting protein | location=Pf3D7_12_v3:1931970-1932584(+) | protein_length=204 | sequence_SO=chromosome | SO=protein_coding | is_pseudo=false	0.00087	0.00041	0	0	20.1	38.8656	0	0	0.463859	11	7	X	X
PF3D7_0303400	| transcript=PF3D7_0303400.1 | gene=PF3D7_0303400 | organism=Plasmodium_falciparum_3D7 | gene_product=palmitoyltransferase DHHC1 | transcript_product=palmitoyltransferase DHHC1 | location=Pf3D7_03_v3:178420-181127(+) | protein_length=616 | sequence_SO=chromosome | SO=protein_coding | is_pseudo=false	0.00013	6e-05	0	0	18.2	38.8221	0	0	0.463919	5	3	X	X
PF3D7_0630600	| transcript=PF3D7_0630600.1 | gene=PF3D7_0630600 | organism=Plasmodium_falciparum_3D7 | gene_product=conserved protein, unknown function | transcript_product=conserved protein, unknown function | location=Pf3D7_06_v3:1279820-1283246(+) | protein_length=935 | sequence_SO=chromosome | SO=protein_coding | is_pseudo=false	5e-05	4e-05	0	0	17.6	38.4526	0	0	0.464322	3	3	X	X
PF3D7_1438900	| transcript=PF3D7_1438900.1 | gene=PF3D7_1438900 | organism=Plasmodium_falciparum_3D7 | gene_product=thioredoxin peroxidase 1 | transcript_product=thioredoxin peroxidase 1 | location=Pf3D7_14_v3:1575984-1576571(+) | protein_length=195 | sequence_SO=chromosome | SO=protein_coding | is_pseudo=false	0.00033	0.00012	0	0	19.1	36.9263	0	0	0.465957	4	2	X	X
PF3D7_0212500	| transcript=PF3D7_0212500.1 | gene=PF3D7_0212500 | organism=Plasmodium_falciparum_3D7 | gene_product=conserved Plasmodium protein, unknown function | transcript_product=conserved Plasmodium protein, unknown function | location=Pf3D7_02_v3:509525-521746(+) | protein_length=3990 | sequence_SO=chromosome | SO=protein_coding | is_pseudo=false	1e-05	2e-05	0	0	16.3	36.0287	0	0	0.466917	2	6	X	X
PF3D7_1440500	| transcript=PF3D7_1440500.1 | gene=PF3D7_1440500 | organism=Plasmodium_falciparum_3D7 | gene_product=allantoicase, putative | transcript_product=allantoicase, putative | location=Pf3D7_14_v3:1654047-1655708(+) | protein_length=553 | sequence_SO=chromosome | SO=protein_coding | is_pseudo=false	6e-05	0.00015	0	0	18.3	35.9982	0	0	0.466946	2	7	X	X
PF3D7_1451200	| transcript=PF3D7_1451200.1 | gene=PF3D7_1451200 | organism=Plasmodium_falciparum_3D7 | gene_product=conserved Plasmodium protein, unknown function | transcript_product=conserved Plasmodium protein, unknown function | location=Pf3D7_14_v3:2094340-2099736(-) | protein_length=1504 | sequence_SO=chromosome | SO=protein_coding | is_pseudo=false	8e-05	3e-05	0	0	17.6	35.5624	0	0	0.467407	7	4	X	X
PF3D7_1355800	| transcript=PF3D7_1355800.1 | gene=PF3D7_1355800 | organism=Plasmodium_falciparum_3D7 | gene_product=splicing factor 3B subunit 5, putative | transcript_product=splicing factor 3B subunit 5, putative | location=Pf3D7_13_v3:2214445-2215085(+) | protein_length=86 | sequence_SO=chromosome | SO=protein_coding | is_pseudo=false	0.00169	0.00055	0	0	20.6	35.4249	0	0	0.467551	9	4	X	X
PF3D7_0506500	| transcript=PF3D7_0506500.1 | gene=PF3D7_0506500 | organism=Plasmodium_falciparum_3D7 | gene_product=conserved Plasmodium protein, unknown function | transcript_product=conserved Plasmodium protein, unknown function | location=Pf3D7_05_v3:265595-278345(+) | protein_length=3980 | sequence_SO=chromosome | SO=protein_coding | is_pseudo=false	2e-05	1e-05	0	0	16.2	34.8686	0	0	0.468137	4	3	X	X
PF3D7_0307700	| transcript=PF3D7_0307700.1 | gene=PF3D7_0307700 | organism=Plasmodium_falciparum_3D7 | gene_product=conserved Plasmodium protein, unknown function | transcript_product=conserved Plasmodium protein, unknown function | location=Pf3D7_03_v3:328787-335269(-) | protein_length=1826 | sequence_SO=chromosome | SO=protein_coding | is_pseudo=false	0.00029	0.00011	0	0	18.9	33.7265	0	0	0.469303	33	17	X	X
PF3D7_1003600	| transcript=PF3D7_1003600.1 | gene=PF3D7_1003600 | organism=Plasmodium_falciparum_3D7 | gene_product=inner membrane complex protein 1c, putative | transcript_product=inner membrane complex protein 1c, putative | location=Pf3D7_10_v3:164945-165790(+) | protein_length=281 | sequence_SO=chromosome | SO=protein_coding | is_pseudo=false	0.0004	0.00013	0	0	19.1	32.1476	0	0	0.470864	7	3	X	X
PF3D7_0501500	| transcript=PF3D7_0501500.1 | gene=PF3D7_0501500 | organism=Plasmodium_falciparum_3D7 | gene_product=rhoptry-associated protein 3 | transcript_product=rhoptry-associated protein 3 | location=Pf3D7_05_v3:81134-82336(-) | protein_length=400 | sequence_SO=chromosome | SO=protein_coding | is_pseudo=false	0.00012	0.00042	0	0	19.1	31.95	0	0	0.471046	3	14	X	X
PF3D7_1139300	| transcript=PF3D7_1139300.1 | gene=PF3D7_1139300 | organism=Plasmodium_falciparum_3D7 | gene_product=AP2 domain transcription factor, putative | transcript_product=AP2 domain transcription factor, putative | location=Pf3D7_11_v3:1556744-1565045(-) | protein_length=2653 | sequence_SO=chromosome | SO=protein_coding | is_pseudo=false	4e-05	6e-05	0	0	17.5	31.573	0	0	0.471403	6	13	X	X
PF3D7_1447800	| transcript=PF3D7_1447800.1 | gene=PF3D7_1447800 | organism=Plasmodium_falciparum_3D7 | gene_product=calponin homology domain-containing protein, putative | transcript_product=calponin homology domain-containing protein, putative | location=Pf3D7_14_v3:1947246-1953206(+) | protein_length=1986 | sequence_SO=chromosome | SO=protein_coding | is_pseudo=false	3e-05	1e-05	0	0	16.7	30.2935	0	0	0.472536	4	2	X	X
PF3D7_1106000	| transcript=PF3D7_1106000.1 | gene=PF3D7_1106000 | organism=Plasmodium_falciparum_3D7 | gene_product=RuvB-like helicase 2 | transcript_product=RuvB-like helicase 2 | location=Pf3D7_11_v3:255714-257141(-) | protein_length=475 | sequence_SO=chromosome | SO=protein_coding | is_pseudo=false	0.00014	0.00038	0	0	19.2	29.8593	0	0	0.472905	4	15	X	X
PF3D7_1433400	| transcript=PF3D7_1433400.1 | gene=PF3D7_1433400 | organism=Plasmodium_falciparum_3D7 | gene_product=zinc finger protein, putative | transcript_product=zinc finger protein, putative | location=Pf3D7_14_v3:1312304-1329577(-) | protein_length=5757 | sequence_SO=chromosome | SO=protein_coding | is_pseudo=false	1e-05	2e-05	0	0	16.4	28.375	0	0	0.474063	3	12	X	X
PF3D7_1434500	| transcript=PF3D7_1434500.1 | gene=PF3D7_1434500 | organism=Plasmodium_falciparum_3D7 | gene_product=dynein-related AAA-type ATPase, putative | transcript_product=dynein-related AAA-type ATPase, putative | location=Pf3D7_14_v3:1378348-1402665(-) | protein_length=8105 | sequence_SO=chromosome | SO=protein_coding | is_pseudo=false	1e-05	0	0	0	15.3	28.176	0	0	0.474213	4	2	X	X
PF3D7_1002400	0 genes:. 2 proteins in this group did not match any genes. PF3D7_1002400:| transcript=PF3D7_1002400.1 | gene=PF3D7_1002400 | organism=Plasmodium_falciparum_3D7 | gene_product=transformer-2 protein homolog beta, putative | transcript_product=transformer-2 protein homolog beta, putative | location=Pf3D7_10_v3:121115-123291(+) | protein_length=248 | sequence_SO=chromosome | SO=protein_coding | is_p…	0.00091	0.00014	0	0	19.5	25.3239	0	0	0.476034	14	3	X	X
PF3D7_1330800	| transcript=PF3D7_1330800.1 | gene=PF3D7_1330800 | organism=Plasmodium_falciparum_3D7 | gene_product=RNA-binding protein, putative | transcript_product=RNA-binding protein, putative | location=Pf3D7_13_v3:1294615-1296966(+) | protein_length=596 | sequence_SO=chromosome | SO=protein_coding | is_pseudo=false	5e-05	0.00018	0	0	18.3	24.4528	0	0	0.4765	2	9	X	X
PF3D7_0516800	| transcript=PF3D7_0516800.1 | gene=PF3D7_0516800 | organism=Plasmodium_falciparum_3D7 | gene_product=AP2 domain transcription factor AP2-O2, putative | transcript_product=AP2 domain transcription factor AP2-O2, putative | location=Pf3D7_05_v3:700120-707256(-) | protein_length=2378 | sequence_SO=chromosome | SO=protein_coding | is_pseudo=false	3e-05	0.00013	0	0	17.8	24.4454	0	0	0.476507	4	26	X	X
PF3D7_0926100	| transcript=PF3D7_0926100.1 | gene=PF3D7_0926100 | organism=Plasmodium_falciparum_3D7 | gene_product=protein kinase, putative | transcript_product=protein kinase, putative | location=Pf3D7_09_v3:1048280-1057816(-) | protein_length=3178 | sequence_SO=chromosome | SO=protein_coding | is_pseudo=false	5e-05	1e-05	0	0	16.8	23.3837	0	0	0.477013	9	3	X	X
PF3D7_0115600	| transcript=PF3D7_0115600.1 | gene=PF3D7_0115600 | organism=Plasmodium_falciparum_3D7 | gene_product=rifin | transcript_product=rifin | location=Pf3D7_01_v3:604162-605531(+) | protein_length=379 | sequence_SO=chromosome | SO=protein_coding | is_pseudo=false	0.00021	9e-05	0	0	18.6	18.5784	0	0	0.478678	5	3	X	X
PF3D7_0609000	| transcript=PF3D7_0609000.1 | gene=PF3D7_0609000 | organism=Plasmodium_falciparum_3D7 | gene_product=nucleoporin NUP637, putative | transcript_product=nucleoporin NUP637, putative | location=Pf3D7_06_v3:370261-388494(+) | protein_length=6077 | sequence_SO=chromosome | SO=protein_coding | is_pseudo=false	2e-05	0	0	0	15.9	17.5972	0	0	0.478934	8	2	X	X
PF3D7_0903700	| transcript=PF3D7_0903700.1 | gene=PF3D7_0903700 | organism=Plasmodium_falciparum_3D7 | gene_product=alpha tubulin 1 | transcript_product=alpha tubulin 1 | location=Pf3D7_09_v3:175542-177442(+) | protein_length=453 | sequence_SO=chromosome | SO=protein_coding | is_pseudo=false	1e-05	0.00022	0	0	16.9	9.8175	0	0	0.491672	0.3	8.5	X	X
PF3D7_1468100	| transcript=PF3D7_1468100.1 | gene=PF3D7_1468100 | organism=Plasmodium_falciparum_3D7 | gene_product=conserved Plasmodium protein, unknown function | transcript_product=conserved Plasmodium protein, unknown function | location=Pf3D7_14_v3:2786308-2794323(-) | protein_length=2558 | sequence_SO=chromosome | SO=protein_coding | is_pseudo=false	0.00657	0.00548	0.00011	0.00026	3.5	7.6356	2.5e-05	1e-06	0.513435	1041	1177	16	43
PF3D7_0613800	| transcript=PF3D7_0613800.1 | gene=PF3D7_0613800 | organism=Plasmodium_falciparum_3D7 | gene_product=AP2 domain transcription factor, putative | transcript_product=AP2 domain transcription factor, putative | location=Pf3D7_06_v3:566139-578993(+) | protein_length=4109 | sequence_SO=chromosome | SO=protein_coding | is_pseudo=false	0.00085	0.00065	1e-05	3e-05	3.8	6.9647	0.000183	1e-05	0.524698	215	226	2	8
PF3D7_1107800	| transcript=PF3D7_1107800.1 | gene=PF3D7_1107800 | organism=Plasmodium_falciparum_3D7 | gene_product=AP2 domain transcription factor, putative | transcript_product=AP2 domain transcription factor, putative | location=Pf3D7_11_v3:329867-335601(-) | protein_length=1828 | sequence_SO=chromosome | SO=protein_coding | is_pseudo=false	0.00067	0.00042	3e-05	2e-05	3.2	6.4716	0.000701	4.1e-05	0.534881	76	64	3	2
PF3D7_0925700	| transcript=PF3D7_0925700.1 | gene=PF3D7_0925700 | organism=Plasmodium_falciparum_3D7 | gene_product=histone deacetylase 1 | transcript_product=histone deacetylase 1 | location=Pf3D7_09_v3:1028661-1030010(-) | protein_length=449 | sequence_SO=chromosome | SO=protein_coding | is_pseudo=false	0.00665	0.00512	8e-05	0.00024	3.7	6.2803	0.001147	7.1e-05	0.539336	185	193	2	7
PF3D7_0405400	| transcript=PF3D7_0405400.1 | gene=PF3D7_0405400 | organism=Plasmodium_falciparum_3D7 | gene_product=pre-mRNA-processing-splicing factor 8, putative | transcript_product=pre-mRNA-processing-splicing factor 8, putative | location=Pf3D7_04_v3:291251-300976(+) | protein_length=3136 | sequence_SO=chromosome | SO=protein_coding | is_pseudo=false	0.00012	0.00012	4e-05	3e-05	1.2	3.5208	0.230353	0.025167	0.635424	24	32	7	7
PF3D7_1105100	| transcript=PF3D7_1105100.1 | gene=PF3D7_1105100 | organism=Plasmodium_falciparum_3D7 | gene_product=histone H2B | transcript_product=histone H2B | location=Pf3D7_11_v3:226065-226418(+) | protein_length=117 | sequence_SO=chromosome | SO=protein_coding | is_pseudo=false	0.00745	0.00459	0.00093	0.00133	1.7	3.404	0.267744	0.029623	0.639331	54	45.1	6	10
PF3D7_0823300	| transcript=PF3D7_0823300.1 | gene=PF3D7_0823300 | organism=Plasmodium_falciparum_3D7 | gene_product=histone acetyltransferase GCN5 | transcript_product=histone acetyltransferase GCN5 | location=Pf3D7_08_v3:1028752-1033514(+) | protein_length=1465 | sequence_SO=chromosome | SO=protein_coding | is_pseudo=false	6e-05	0.00015	2e-05	2e-05	1.4	3.0958	0.386868	0.046047	0.648948	5	18	2	2
PF3D7_0519800	| transcript=PF3D7_0519800.1 | gene=PF3D7_0519800 | organism=Plasmodium_falciparum_3D7 | gene_product=EELM2 domain-containing protein, putative | transcript_product=EELM2 domain-containing protein, putative | location=Pf3D7_05_v3:820719-822908(-) | protein_length=668 | sequence_SO=chromosome | SO=protein_coding | is_pseudo=false	0.00058	0.00041	0	5e-05	11	3.0862	0.391066	0.046042	0.648951	24	23	X	2
PF3D7_0105800	| transcript=PF3D7_0105800.1 | gene=PF3D7_0105800 | organism=Plasmodium_falciparum_3D7 | gene_product=cyclin-dependent kinases regulatory subunit, putative | transcript_product=cyclin-dependent kinases regulatory subunit, putative | location=Pf3D7_01_v3:249231-252010(-) | protein_length=832 | sequence_SO=chromosome | SO=protein_coding | is_pseudo=false	0.00019	0.00033	0	0.00011	9.5	3.0613	0.402091	0.047752	0.649641	10	23	X	6
PF3D7_1447000	| transcript=PF3D7_1447000.1 | gene=PF3D7_1447000 | organism=Plasmodium_falciparum_3D7 | gene_product=40S ribosomal protein S5 | transcript_product=40S ribosomal protein S5 | location=Pf3D7_14_v3:1929931-1931379(+) | protein_length=272 | sequence_SO=chromosome | SO=protein_coding | is_pseudo=false	0.00261	0.00341	0.00107	0.00109	1	3.0301	0.416185	0.049504	0.650304	44	78	16	19
PF3D7_1364800	| transcript=PF3D7_1364800.1 | gene=PF3D7_1364800 | organism=Plasmodium_falciparum_3D7 | gene_product=DNA-directed RNA polymerases I, II, and III subunit RPABC1, putative | transcript_product=DNA-directed RNA polymerases I, II, and III subunit RPABC1, putative | location=Pf3D7_13_v3:2603463-2604972(-) | protein_length=205 | sequence_SO=chromosome | SO=protein_coding | is_pseudo=false	0.00118	0.00104	0.00044	0.00046	0.9	3.0036	0.428399	0.05131	0.650937	15	18	5	6
PF3D7_1141800	| transcript=PF3D7_1141800.1 | gene=PF3D7_1141800 | organism=Plasmodium_falciparum_3D7 | gene_product=EELM2 domain-containing protein, putative | transcript_product=EELM2 domain-containing protein, putative | location=Pf3D7_11_v3:1672519-1674557(-) | protein_length=394 | sequence_SO=chromosome | SO=protein_coding | is_pseudo=false	0.00193	0.00115	0	8e-05	10.6	2.9903	0.434613	0.052231	0.651242	47	38	X	2
PF3D7_1239800	| transcript=PF3D7_1239800.1 | gene=PF3D7_1239800 | organism=Plasmodium_falciparum_3D7 | gene_product=conserved Plasmodium protein, unknown function | transcript_product=conserved Plasmodium protein, unknown function | location=Pf3D7_12_v3:1660451-1677754(+) | protein_length=5767 | sequence_SO=chromosome | SO=protein_coding | is_pseudo=false	4e-05	4e-05	0	2e-05	8.5	2.9705	0.443967	0.054115	0.651827	15	17	X	9
PF3D7_1437900	| transcript=PF3D7_1437900.1 | gene=PF3D7_1437900 | organism=Plasmodium_falciparum_3D7 | gene_product=HSP40, subfamily A | transcript_product=HSP40, subfamily A | location=Pf3D7_14_v3:1533329-1534947(+) | protein_length=424 | sequence_SO=chromosome | SO=protein_coding | is_pseudo=false	0.00027	0.00045	0	0.00011	9.9	2.9646	0.446778	0.054112	0.651829	7	16	X	3
PF3D7_1428300	| transcript=PF3D7_1428300.1 | gene=PF3D7_1428300 | organism=Plasmodium_falciparum_3D7 | gene_product=proliferation-associated protein 2g4, putative | transcript_product=proliferation-associated protein 2g4, putative | location=Pf3D7_14_v3:1105200-1106514(-) | protein_length=377 | sequence_SO=chromosome | SO=protein_coding | is_pseudo=false	0.00013	0.00013	0	8e-05	8.9	2.9452	0.456097	0.056045	0.652381	3	4	X	2
PF3D7_0918300	| transcript=PF3D7_0918300.1 | gene=PF3D7_0918300 | organism=Plasmodium_falciparum_3D7 | gene_product=eukaryotic translation initiation factor 3 subunit F, putative | transcript_product=eukaryotic translation initiation factor 3 subunit F, putative | location=Pf3D7_09_v3:751358-752422(-) | protein_length=320 | sequence_SO=chromosome | SO=protein_coding | is_pseudo=false	0.00056	0.00045	0	0.00053	9.5	2.9171	0.469804	0.058026	0.652903	11	12	X	11
PF3D7_0715200	| transcript=PF3D7_0715200.1 | gene=PF3D7_0715200 | organism=Plasmodium_falciparum_3D7 | gene_product=conserved Plasmodium protein, unknown function | transcript_product=conserved Plasmodium protein, unknown function | location=Pf3D7_07_v3:676061-682681(-) | protein_length=2206 | sequence_SO=chromosome | SO=protein_coding | is_pseudo=false	5e-05	0.00015	0	1e-05	9.5	2.8569	0.499986	0.062142	0.653845	7	28	X	2
PF3D7_1421200	| transcript=PF3D7_1421200.1 | gene=PF3D7_1421200 | organism=Plasmodium_falciparum_3D7 | gene_product=40S ribosomal protein S25 | transcript_product=40S ribosomal protein S25 | location=Pf3D7_14_v3:875687-876385(-) | protein_length=105 | sequence_SO=chromosome | SO=protein_coding | is_pseudo=false	0.00385	0.0017	0	0.00385	9	2.8133	0.522527	0.065367	0.654455	25	15	X	26
PF3D7_1252100	| transcript=PF3D7_1252100.1 | gene=PF3D7_1252100 | organism=Plasmodium_falciparum_3D7 | gene_product=rhoptry neck protein 3 | transcript_product=rhoptry neck protein 3 | location=Pf3D7_12_v3:2114628-2122487(-) | protein_length=2215 | sequence_SO=chromosome | SO=protein_coding | is_pseudo=false	0.00058	0.00038	7e-05	0.00016	1.5	2.8113	0.523574	0.065364	0.654455	80	71	8	23
PF3D7_1309700	| transcript=PF3D7_1309700.1 | gene=PF3D7_1309700 | organism=Plasmodium_falciparum_3D7 | gene_product=vacuolar protein sorting-associated protein 18, putative | transcript_product=vacuolar protein sorting-associated protein 18, putative | location=Pf3D7_13_v3:440265-445283(+) | protein_length=1672 | sequence_SO=chromosome | SO=protein_coding | is_pseudo=false	6e-05	2e-05	0	2e-05	8.1	2.8001	0.529462	0.06647	0.654639	6	3	X	2
PF3D7_0935800	| transcript=PF3D7_0935800.1 | gene=PF3D7_0935800 | organism=Plasmodium_falciparum_3D7 | gene_product=cytoadherence linked asexual protein 9 | transcript_product=cytoadherence linked asexual protein 9 | location=Pf3D7_09_v3:1413840-1419754(+) | protein_length=1340 | sequence_SO=chromosome | SO=protein_coding | is_pseudo=false	0.00033	0.00019	0	0.0002	9.3	2.7896	0.535015	0.067588	0.654812	27	21	X	17
PF3D7_1011800	| transcript=PF3D7_1011800.1 | gene=PF3D7_1011800 | organism=Plasmodium_falciparum_3D7 | gene_product=PRE-binding protein | transcript_product=PRE-binding protein | location=Pf3D7_10_v3:455398-458817(+) | protein_length=1139 | sequence_SO=chromosome | SO=protein_coding | is_pseudo=false	0.00057	0.00034	8e-05	0.00016	1.3	2.778	0.541187	0.068719	0.654975	40	33	5	12
PF3D7_1367600	| transcript=PF3D7_1367600.1 | gene=PF3D7_1367600 | organism=Plasmodium_falciparum_3D7 | gene_product=ribosome biogenesis protein MRT4, putative | transcript_product=ribosome biogenesis protein MRT4, putative | location=Pf3D7_13_v3:2693921-2694859(-) | protein_length=222 | sequence_SO=chromosome | SO=protein_coding | is_pseudo=false	0.00022	0.00021	0	0.00014	9.4	2.7731	0.543806	0.068715	0.654977	3	4	X	2
PF3D7_1014600	| transcript=PF3D7_1014600.1 | gene=PF3D7_1014600 | organism=Plasmodium_falciparum_3D7 | gene_product=transcriptional coactivator ADA2 | transcript_product=transcriptional coactivator ADA2 | location=Pf3D7_10_v3:581354-589090(-) | protein_length=2578 | sequence_SO=chromosome | SO=protein_coding | is_pseudo=false	0.0001	8e-05	4e-05	2e-05	1.3	2.7373	0.563146	0.07219	0.655407	16	17	5	3
PF3D7_1126200	| transcript=PF3D7_1126200.1 | gene=PF3D7_1126200 | organism=Plasmodium_falciparum_3D7 | gene_product=40S ribosomal protein S18, putative | transcript_product=40S ribosomal protein S18, putative | location=Pf3D7_11_v3:1023790-1024496(-) | protein_length=156 | sequence_SO=chromosome | SO=protein_coding | is_pseudo=false	0.00031	0.00015	0	0.0002	8.8	2.7354	0.564183	0.072189	0.655408	3	2	X	2
PF3D7_1460300	| transcript=PF3D7_1460300.1 | gene=PF3D7_1460300 | organism=Plasmodium_falciparum_3D7 | gene_product=60S ribosomal protein L29, putative | transcript_product=60S ribosomal protein L29, putative | location=Pf3D7_14_v3:2459214-2459964(-) | protein_length=67 | sequence_SO=chromosome | SO=protein_coding | is_pseudo=false	0.00578	0.00036	0.00081	0	9.7	2.7351	0.564347	0.072189	0.655408	24	2	3	X
PF3D7_0517400	| transcript=PF3D7_0517400.1 | gene=PF3D7_0517400 | organism=Plasmodium_falciparum_3D7 | gene_product=FACT complex subunit SPT16, putative | transcript_product=FACT complex subunit SPT16, putative | location=Pf3D7_05_v3:731407-735162(+) | protein_length=1141 | sequence_SO=chromosome | SO=protein_coding | is_pseudo=false	0.00013	3e-05	0	8e-05	8.3	2.7129	0.576534	0.074573	0.655641	9	3	X	6
PF3D7_1241200	| transcript=PF3D7_1241200.1 | gene=PF3D7_1241200 | organism=Plasmodium_falciparum_3D7 | gene_product=conserved Plasmodium protein, unknown function | transcript_product=conserved Plasmodium protein, unknown function | location=Pf3D7_12_v3:1748873-1756237(-) | protein_length=2309 | sequence_SO=chromosome | SO=protein_coding | is_pseudo=false	0	4e-05	0	0	7.4	2.7052	0.580793	0.074569	0.655645	X	7	X	X
PF3D7_1472200	| transcript=PF3D7_1472200.1 | gene=PF3D7_1472200 | organism=Plasmodium_falciparum_3D7 | gene_product=histone deacetylase, putative | transcript_product=histone deacetylase, putative | location=Pf3D7_14_v3:2945662-2952551(+) | protein_length=2251 | sequence_SO=chromosome | SO=protein_coding | is_pseudo=false	0.00011	0.00015	0	5e-05	8.6	2.6954	0.586237	0.075785	0.655745	15	29	X	7
PF3D7_1231100	| transcript=PF3D7_1231100.1 | gene=PF3D7_1231100 | organism=Plasmodium_falciparum_3D7 | gene_product=ras-related protein Rab-2 | transcript_product=ras-related protein Rab-2 | location=Pf3D7_12_v3:1276257-1277734(+) | protein_length=213 | sequence_SO=chromosome | SO=protein_coding | is_pseudo=false	0.00053	0.00067	0	0.00073	8.2	2.676	0.59709	0.077006	0.655837	7	12	X	10
PF3D7_1014700	| transcript=PF3D7_1014700.1 | gene=PF3D7_1014700 | organism=Plasmodium_falciparum_3D7 | gene_product=prohibitin 2, putative | transcript_product=prohibitin 2, putative | location=Pf3D7_10_v3:595308-596222(+) | protein_length=304 | sequence_SO=chromosome | SO=protein_coding | is_pseudo=false	0	0.00016	0	0	7.4	2.6354	0.620124	0.080769	0.656042	X	4	X	X
PF3D7_1136500	| transcript=PF3D7_1136500.1 | gene=PF3D7_1136500 | organism=Plasmodium_falciparum_3D7 | gene_product=casein kinase 1 | transcript_product=casein kinase 1 | location=Pf3D7_11_v3:1433141-1435170(-) | protein_length=323 | sequence_SO=chromosome | SO=protein_coding | is_pseudo=false	0.00125	0.00096	0	0.00053	8.9	2.6154	0.631627	0.083354	0.656117	25	26	X	11
PF3D7_1015600	| transcript=PF3D7_1015600.1 | gene=PF3D7_1015600 | organism=Plasmodium_falciparum_3D7 | gene_product=heat shock protein 60 | transcript_product=heat shock protein 60 | location=Pf3D7_10_v3:627044-629040(-) | protein_length=580 | sequence_SO=chromosome | SO=protein_coding | is_pseudo=false	8e-05	0.00025	6e-05	0	8.6	2.6064	0.636836	0.083346	0.656121	3	12	2	X
PF3D7_1003500	| transcript=PF3D7_1003500.1 | gene=PF3D7_1003500 | organism=Plasmodium_falciparum_3D7 | gene_product=40S ribosomal protein S20e, putative | transcript_product=40S ribosomal protein S20e, putative | location=Pf3D7_10_v3:160316-160962(-) | protein_length=118 | sequence_SO=chromosome | SO=protein_coding | is_pseudo=false	0.00027	0.0002	0	0.00026	7.4	2.6027	0.638983	0.084665	0.656138	2	2	X	2
PF3D7_0829200	| transcript=PF3D7_0829200.1 | gene=PF3D7_0829200 | organism=Plasmodium_falciparum_3D7 | gene_product=prohibitin 1, putative | transcript_product=prohibitin 1, putative | location=Pf3D7_08_v3:1254558-1255376(+) | protein_length=272 | sequence_SO=chromosome | SO=protein_coding | is_pseudo=false	0	0.00013	0	0	7.8	2.5976	0.641949	0.084662	0.656141	X	3	X	X
PF3D7_0312800	| transcript=PF3D7_0312800.1 | gene=PF3D7_0312800 | organism=Plasmodium_falciparum_3D7 | gene_product=60S ribosomal protein L26, putative | transcript_product=60S ribosomal protein L26, putative | location=Pf3D7_03_v3:534239-535238(+) | protein_length=126 | sequence_SO=chromosome | SO=protein_coding | is_pseudo=false	0.00026	0.00028	0	0.00037	8.8	2.5458	0.672421	0.09005	0.656103	2	3	X	3
PF3D7_0302500	| transcript=PF3D7_0302500.1 | gene=PF3D7_0302500 | organism=Plasmodium_falciparum_3D7 | gene_product=cytoadherence linked asexual protein 3.1 | transcript_product=cytoadherence linked asexual protein 3.1 | location=Pf3D7_03_v3:135418-140660(+) | protein_length=1417 | sequence_SO=chromosome | SO=protein_coding | is_pseudo=false	0.00013	5e-05	8e-05	0	8.8	2.5452	0.672778	0.09005	0.656104	11	6.5	6	0
PF3D7_1460500	| transcript=PF3D7_1460500.1 | gene=PF3D7_1460500 | organism=Plasmodium_falciparum_3D7 | gene_product=conserved Plasmodium protein, unknown function | transcript_product=conserved Plasmodium protein, unknown function | location=Pf3D7_14_v3:2466091-2470989(+) | protein_length=1632 | sequence_SO=chromosome | SO=protein_coding | is_pseudo=false	0.00108	0.0012	7e-05	0.00035	2.2	2.5383	0.676885	0.090044	0.656106	109	164	6	37
PF3D7_0729100	| transcript=PF3D7_0729100.1 | gene=PF3D7_0729100 | organism=Plasmodium_falciparum_3D7 | gene_product=conserved Plasmodium protein, unknown function | transcript_product=conserved Plasmodium protein, unknown function | location=Pf3D7_07_v3:1238446-1246188(+) | protein_length=2580 | sequence_SO=chromosome | SO=protein_coding | is_pseudo=false	6e-05	2e-05	0	2e-05	7.8	2.5355	0.678555	0.091434	0.656061	9	5	X	3
PF3D7_0520400	| transcript=PF3D7_0520400.1 | gene=PF3D7_0520400 | organism=Plasmodium_falciparum_3D7 | gene_product=single-stranded DNA-binding protein, putative | transcript_product=single-stranded DNA-binding protein, putative | location=Pf3D7_05_v3:839655-840560(-) | protein_length=301 | sequence_SO=chromosome | SO=protein_coding | is_pseudo=false	0.00075	0.00091	0	0.00016	9.9	2.5348	0.678973	0.091434	0.656061	14	23	X	3
PF3D7_1111100	| transcript=PF3D7_1111100.1 | gene=PF3D7_1111100 | organism=Plasmodium_falciparum_3D7 | gene_product=replication factor C subunit 5, putative | transcript_product=replication factor C subunit 5, putative | location=Pf3D7_11_v3:437171-438220(-) | protein_length=349 | sequence_SO=chromosome | SO=protein_coding | is_pseudo=false	0.00019	7e-05	0	0.00018	8.4	2.5339	0.67951	0.091433	0.656062	4	2	X	4
PF3D7_1236100	| transcript=PF3D7_1236100.1 | gene=PF3D7_1236100 | organism=Plasmodium_falciparum_3D7 | gene_product=clustered-asparagine-rich protein | transcript_product=clustered-asparagine-rich protein | location=Pf3D7_12_v3:1506932-1508269(-) | protein_length=445 | sequence_SO=chromosome | SO=protein_coding | is_pseudo=false	0.00018	0.00019	8e-05	7e-05	0.9	2.5237	0.685611	0.091425	0.656066	5	7	2	2
PF3D7_0215700	| transcript=PF3D7_0215700.1 | gene=PF3D7_0215700 | organism=Plasmodium_falciparum_3D7 | gene_product=DNA-directed RNA polymerase II subunit RPB2, putative | transcript_product=DNA-directed RNA polymerase II subunit RPB2, putative | location=Pf3D7_02_v3:645929-650085(+) | protein_length=1340 | sequence_SO=chromosome | SO=protein_coding | is_pseudo=false	0.00042	0.00012	0	7e-05	8.3	2.5179	0.689092	0.092829	0.65601	35	14	X	6
PF3D7_1342600	| transcript=PF3D7_1342600.1 | gene=PF3D7_1342600 | organism=Plasmodium_falciparum_3D7 | gene_product=myosin A | transcript_product=myosin A | location=Pf3D7_13_v3:1673699-1676539(+) | protein_length=818 | sequence_SO=chromosome | SO=protein_coding | is_pseudo=false	0.00055	0.00023	0	4e-05	8.9	2.5141	0.691376	0.092827	0.656012	28	16	X	2
PF3D7_1022400	| transcript=PF3D7_1022400.1 | gene=PF3D7_1022400 | organism=Plasmodium_falciparum_3D7 | gene_product=serine/arginine-rich splicing factor 4 | transcript_product=serine/arginine-rich splicing factor 4 | location=Pf3D7_10_v3:939938-942234(-) | protein_length=538 | sequence_SO=chromosome | SO=protein_coding | is_pseudo=false	0.00036	9e-05	0	9e-05	9.1	2.5115	0.69294	0.092824	0.656013	12	4	X	3
PF3D7_0317200	| transcript=PF3D7_0317200.1 | gene=PF3D7_0317200 | organism=Plasmodium_falciparum_3D7 | gene_product=cdc2-related protein kinase 4 | transcript_product=cdc2-related protein kinase 4 | location=Pf3D7_03_v3:690154-694815(-) | protein_length=1553 | sequence_SO=chromosome | SO=protein_coding | is_pseudo=false	8e-05	5e-05	0	2e-05	8	2.5034	0.697823	0.09424	0.655945	8	6	X	2
PF3D7_0918200	| transcript=PF3D7_0918200.1 | gene=PF3D7_0918200 | organism=Plasmodium_falciparum_3D7 | gene_product=50S ribosomal protein L3, apicoplast, putative | transcript_product=50S ribosomal protein L3, apicoplast, putative | location=Pf3D7_09_v3:748678-750262(-) | protein_length=317 | sequence_SO=chromosome | SO=protein_coding | is_pseudo=false	0	8e-05	0	0	7.5	2.4832	0.710062	0.095659	0.655868	X	2	X	X
PF3D7_1107300	| transcript=PF3D7_1107300.1 | gene=PF3D7_1107300 | organism=Plasmodium_falciparum_3D7 | gene_product=polyadenylate-binding protein-interacting protein 1, putative | transcript_product=polyadenylate-binding protein-interacting protein 1, putative | location=Pf3D7_11_v3:301283-311287(-) | protein_length=3334 | sequence_SO=chromosome | SO=protein_coding | is_pseudo=false	0	1e-05	0	0	7	2.4764	0.714202	0.097106	0.655773	X	4	X	X
PF3D7_1129400	| transcript=PF3D7_1129400.1 | gene=PF3D7_1129400 | organism=Plasmodium_falciparum_3D7 | gene_product=rRNA (cytosine-C(5))-methyltransferase, putative | transcript_product=rRNA (cytosine-C(5))-methyltransferase, putative | location=Pf3D7_11_v3:1138075-1139979(-) | protein_length=634 | sequence_SO=chromosome | SO=protein_coding | is_pseudo=false	5e-05	4e-05	0	5e-05	7.8	2.4719	0.716946	0.097102	0.655775	2	2	X	2
PF3D7_1308400	| transcript=PF3D7_1308400.1 | gene=PF3D7_1308400 | organism=Plasmodium_falciparum_3D7 | gene_product=conserved Plasmodium protein, unknown function | transcript_product=conserved Plasmodium protein, unknown function | location=Pf3D7_13_v3:373487-392072(-) | protein_length=6147 | sequence_SO=chromosome | SO=protein_coding | is_pseudo=false	4e-05	4e-05	0	1e-05	7.6	2.4713	0.717312	0.097102	0.655775	17	20	X	3
PF3D7_1456000	| transcript=PF3D7_1456000.1 | gene=PF3D7_1456000 | organism=Plasmodium_falciparum_3D7 | gene_product=AP2 domain transcription factor, putative | transcript_product=AP2 domain transcription factor, putative | location=Pf3D7_14_v3:2296491-2300868(+) | protein_length=1374 | sequence_SO=chromosome | SO=protein_coding | is_pseudo=false	5e-05	0	0	0	7.9	2.4694	0.718472	0.097099	0.655775	4	X	X	X
PF3D7_1018200	| transcript=PF3D7_1018200.1 | gene=PF3D7_1018200 | organism=Plasmodium_falciparum_3D7 | gene_product=serine/threonine protein phosphatase 8, putative | transcript_product=serine/threonine protein phosphatase 8, putative | location=Pf3D7_10_v3:721734-728331(-) | protein_length=2166 | sequence_SO=chromosome | SO=protein_coding | is_pseudo=false	2e-05	0	0	0	7.3	2.4578	0.725572	0.098556	0.655669	3	X	X	X
PF3D7_0515700	| transcript=PF3D7_0515700.1 | gene=PF3D7_0515700 | organism=Plasmodium_falciparum_3D7 | gene_product=glideosome-associated protein 40, putative | transcript_product=glideosome-associated protein 40, putative | location=Pf3D7_05_v3:653966-655336(-) | protein_length=456 | sequence_SO=chromosome | SO=protein_coding | is_pseudo=false	0	0.00042	0	0	8.4	2.4422	0.735161	0.100023	0.65555	X	16	X	X
PF3D7_0303200	| transcript=PF3D7_0303200.1 | gene=PF3D7_0303200 | organism=Plasmodium_falciparum_3D7 | gene_product=HAD superfamily protein, putative | transcript_product=HAD superfamily protein, putative | location=Pf3D7_03_v3:169571-174300(+) | protein_length=1162 | sequence_SO=chromosome | SO=protein_coding | is_pseudo=false	3e-05	0	0	0	6.6	2.4239	0.74647	0.103012	0.655266	2	X	X	X
PF3D7_0730500	| transcript=PF3D7_0730500.1 | gene=PF3D7_0730500 | organism=Plasmodium_falciparum_3D7 | gene_product=conserved Plasmodium protein, unknown function | transcript_product=conserved Plasmodium protein, unknown function | location=Pf3D7_07_v3:1305894-1314215(-) | protein_length=2773 | sequence_SO=chromosome | SO=protein_coding | is_pseudo=false	0	1e-05	0	0	7.2	2.402	0.760085	0.104518	0.655109	X	3	X	X
PF3D7_0905900	| transcript=PF3D7_0905900.1 | gene=PF3D7_0905900 | organism=Plasmodium_falciparum_3D7 | gene_product=coatomer subunit beta, putative | transcript_product=coatomer subunit beta, putative | location=Pf3D7_09_v3:293585-296617(-) | protein_length=1010 | sequence_SO=chromosome | SO=protein_coding | is_pseudo=false	0.00024	6e-05	0	0.00018	8.1	2.4014	0.760459	0.104517	0.655109	15	5	X	12
PF3D7_1149400	| transcript=PF3D7_1149400.1 | gene=PF3D7_1149400 | organism=Plasmodium_falciparum_3D7 | gene_product=Plasmodium exported protein, unknown function | transcript_product=Plasmodium exported protein, unknown function | location=Pf3D7_11_v3:1985870-1986639(-) | protein_length=209 | sequence_SO=chromosome | SO=protein_coding | is_pseudo=false	0	0.00017	0	0	6.6	2.3945	0.764768	0.106051	0.654931	X	3	X	X
PF3D7_0903200	| transcript=PF3D7_0903200.1 | gene=PF3D7_0903200 | organism=Plasmodium_falciparum_3D7 | gene_product=ras-related protein RAB7 | transcript_product=ras-related protein RAB7 | location=Pf3D7_09_v3:133762-135587(-) | protein_length=206 | sequence_SO=chromosome | SO=protein_coding | is_pseudo=false	0.00016	0.00023	0	0.00159	8.7	2.3896	0.767832	0.106047	0.654933	2	4	X	21
PF3D7_0517700	| transcript=PF3D7_0517700.1 | gene=PF3D7_0517700 | organism=Plasmodium_falciparum_3D7 | gene_product=eukaryotic translation initiation factor 3 subunit B, putative | transcript_product=eukaryotic translation initiation factor 3 subunit B, putative | location=Pf3D7_05_v3:743179-745329(+) | protein_length=716 | sequence_SO=chromosome | SO=protein_coding | is_pseudo=false	9e-05	0.00012	0	0.00017	8.1	2.3854	0.770461	0.107594	0.654737	4	7	X	8
PF3D7_1206200	| transcript=PF3D7_1206200.1 | gene=PF3D7_1206200 | organism=Plasmodium_falciparum_3D7 | gene_product=eukaryotic translation initiation factor 3 subunit C, putative | transcript_product=eukaryotic translation initiation factor 3 subunit C, putative | location=Pf3D7_12_v3:275744-279336(-) | protein_length=984 | sequence_SO=chromosome | SO=protein_coding | is_pseudo=false	0.00016	0.00013	0	0.00038	7.8	2.3853	0.770524	0.107594	0.654738	10	11	X	24
PF3D7_1117300	| transcript=PF3D7_1117300.1 | gene=PF3D7_1117300 | organism=Plasmodium_falciparum_3D7 | gene_product=conserved protein, unknown function | transcript_product=conserved protein, unknown function | location=Pf3D7_11_v3:662000-662386(+) | protein_length=128 | sequence_SO=chromosome | SO=protein_coding | is_pseudo=false	0.00214	0.00056	0	0.00255	7.8	2.3849	0.770775	0.107593	0.654738	17	6	X	21
PF3D7_0105200	| transcript=PF3D7_0105200.1 | gene=PF3D7_0105200 | organism=Plasmodium_falciparum_3D7 | gene_product=heptatricopeptide repeat and RAP domain-containing protein, putative | transcript_product=heptatricopeptide repeat and RAP domain-containing protein, putative | location=Pf3D7_01_v3:222254-223960(-) | protein_length=568 | sequence_SO=chromosome | SO=protein_coding | is_pseudo=false	0.00017	8e-05	0	0.00011	8.2	2.3822	0.772468	0.107593	0.65474	6	4	X	4
PF3D7_0815600	| transcript=PF3D7_0815600.1 | gene=PF3D7_0815600 | organism=Plasmodium_falciparum_3D7 | gene_product=eukaryotic translation initiation factor 3 subunit G, putative | transcript_product=eukaryotic translation initiation factor 3 subunit G, putative | location=Pf3D7_08_v3:729917-732187(-) | protein_length=268 | sequence_SO=chromosome | SO=protein_coding | is_pseudo=false	0.00024	0.00036	0	0.00029	9.2	2.3672	0.781892	0.109148	0.654537	4	8	X	5
PF3D7_1452000	| transcript=PF3D7_1452000.1 | gene=PF3D7_1452000 | organism=Plasmodium_falciparum_3D7 | gene_product=rhoptry neck protein 2 | transcript_product=rhoptry neck protein 2 | location=Pf3D7_14_v3:2134298-2140867(+) | protein_length=2189 | sequence_SO=chromosome | SO=protein_coding | is_pseudo=false	0.00012	9e-05	2e-05	4e-05	1.3	2.3635	0.784223	0.109145	0.654539	16	17	2	6
PF3D7_1125100	| transcript=PF3D7_1125100.1 | gene=PF3D7_1125100 | organism=Plasmodium_falciparum_3D7 | gene_product=ATP synthase F0 subunit b-like protein, putative | transcript_product=ATP synthase F0 subunit b-like protein, putative | location=Pf3D7_11_v3:986630-988120(+) | protein_length=496 | sequence_SO=chromosome | SO=protein_coding | is_pseudo=false	7e-05	5e-05	0	9e-05	7.2	2.3544	0.789964	0.110719	0.654318	2	2	X	3
PF3D7_1134100	| transcript=PF3D7_1134100.1 | gene=PF3D7_1134100 | organism=Plasmodium_falciparum_3D7 | gene_product=protein disulfide isomerase | transcript_product=protein disulfide isomerase | location=Pf3D7_11_v3:1323043-1324314(-) | protein_length=423 | sequence_SO=chromosome | SO=protein_coding | is_pseudo=false	0.00076	0.00011	0	0.00015	8.7	2.3519	0.791543	0.110717	0.654319	20	4	X	4
PF3D7_1108500	| transcript=PF3D7_1108500.1 | gene=PF3D7_1108500 | organism=Plasmodium_falciparum_3D7 | gene_product=succinyl-CoA synthetase alpha subunit, putative | transcript_product=succinyl-CoA synthetase alpha subunit, putative | location=Pf3D7_11_v3:367316-368823(+) | protein_length=327 | sequence_SO=chromosome | SO=protein_coding | is_pseudo=false	0.0001	0.00015	0.00011	0	8.6	2.3434	0.79692	0.112305	0.654082	2	4	2	X
PF3D7_0605800	| transcript=PF3D7_0605800.1 | gene=PF3D7_0605800 | organism=Plasmodium_falciparum_3D7 | gene_product=DNA repair protein RAD50, putative | transcript_product=DNA repair protein RAD50, putative | location=Pf3D7_06_v3:237811-244521(-) | protein_length=2236 | sequence_SO=chromosome | SO=protein_coding | is_pseudo=false	8e-05	3e-05	0	1e-05	8.4	2.3415	0.798124	0.112304	0.654084	11	5	X	2
PF3D7_1320800	| transcript=PF3D7_1320800.1 | gene=PF3D7_1320800 | organism=Plasmodium_falciparum_3D7 | gene_product=dihydrolipoyllysine-residue succinyltransferase component of 2-oxoglutarate dehydrogenase complex | transcript_product=dihydrolipoyllysine-residue succinyltransferase component of 2-oxoglutarate dehydrogenase complex | location=Pf3D7_13_v3:854932-856463(+) | protein_length=421 | sequence_SO=chrom…	0.00012	0.00017	9e-05	0	7.8	2.3357	0.801801	0.1123	0.654087	3	6	2	X
PF3D7_1007700	| transcript=PF3D7_1007700.1 | gene=PF3D7_1007700 | organism=Plasmodium_falciparum_3D7 | gene_product=AP2 domain transcription factor AP2-I | transcript_product=AP2 domain transcription factor AP2-I | location=Pf3D7_10_v3:301126-305919(-) | protein_length=1597 | sequence_SO=chromosome | SO=protein_coding | is_pseudo=false	0.00072	0.00054	0.00016	0.0003	1	2.3318	0.804276	0.112295	0.654088	71	72	14	31
PF3D7_1455200	0 genes:. 2 proteins in this group did not match any genes. PF3D7_1455200:| transcript=PF3D7_1455200.1 | gene=PF3D7_1455200 | organism=Plasmodium_falciparum_3D7 | gene_product=methyltransferase, putative, unspecified product | transcript_product=methyltransferase, putative | location=Pf3D7_14_v3:2255062-2256741(+) | protein_length=205 | sequence_SO=chromosome | SO=protein_coding | is_pseudo=false…	0	0.00012	0	0	7.9	2.3306	0.805038	0.113904	0.653833	X	2	X	X
PF3D7_1434800	| transcript=PF3D7_1434800.1 | gene=PF3D7_1434800 | organism=Plasmodium_falciparum_3D7 | gene_product=mitochondrial acidic protein MAM33, putative | transcript_product=mitochondrial acidic protein MAM33, putative | location=Pf3D7_14_v3:1410139-1410897(+) | protein_length=252 | sequence_SO=chromosome | SO=protein_coding | is_pseudo=false	0.00026	0.00043	0.00014	0.00012	0.9	2.3226	0.810125	0.1139	0.653838	4	9	2	2
PF3D7_0706500	| transcript=PF3D7_0706500.1 | gene=PF3D7_0706500 | organism=Plasmodium_falciparum_3D7 | gene_product=conserved Plasmodium protein, unknown function | transcript_product=conserved Plasmodium protein, unknown function | location=Pf3D7_07_v3:309902-315022(-) | protein_length=1706 | sequence_SO=chromosome | SO=protein_coding | is_pseudo=false	4e-05	6e-05	0	4e-05	8.3	2.3066	0.820325	0.115511	0.653576	4	8	X	4
PF3D7_0407800	| transcript=PF3D7_0407800.1 | gene=PF3D7_0407800 | organism=Plasmodium_falciparum_3D7 | gene_product=conserved Plasmodium protein, unknown function | transcript_product=conserved Plasmodium protein, unknown function | location=Pf3D7_04_v3:384924-390806(+) | protein_length=1960 | sequence_SO=chromosome | SO=protein_coding | is_pseudo=false	5e-05	0	0	0	7	2.2965	0.826781	0.117143	0.653296	6	X	X	X
PF3D7_1248700	| transcript=PF3D7_1248700.1 | gene=PF3D7_1248700 | organism=Plasmodium_falciparum_3D7 | gene_product=conserved Plasmodium protein, unknown function | transcript_product=conserved Plasmodium protein, unknown function | location=Pf3D7_12_v3:1994775-2000744(+) | protein_length=1989 | sequence_SO=chromosome | SO=protein_coding | is_pseudo=false	2e-05	5e-05	0	2e-05	7.2	2.282	0.836074	0.118785	0.653002	3	8	X	2
PF3D7_0506900	| transcript=PF3D7_0506900.1 | gene=PF3D7_0506900 | organism=Plasmodium_falciparum_3D7 | gene_product=rhomboid protease ROM4 | transcript_product=rhomboid protease ROM4 | location=Pf3D7_05_v3:288776-291055(-) | protein_length=759 | sequence_SO=chromosome | SO=protein_coding | is_pseudo=false	6e-05	3e-05	0	8e-05	7.2	2.2804	0.8371	0.118783	0.653003	3	2	X	4
PF3D7_0817700	| transcript=PF3D7_0817700.1 | gene=PF3D7_0817700 | organism=Plasmodium_falciparum_3D7 | gene_product=rhoptry neck protein 5 | transcript_product=rhoptry neck protein 5 | location=Pf3D7_08_v3:805797-813465(-) | protein_length=1156 | sequence_SO=chromosome | SO=protein_coding | is_pseudo=false	0.00013	6e-05	0	3e-05	7.7	2.2594	0.850608	0.122116	0.652365	9	6	X	2
PF3D7_1419200	| transcript=PF3D7_1419200.1 | gene=PF3D7_1419200 | organism=Plasmodium_falciparum_3D7 | gene_product=thioredoxin-like protein, putative | transcript_product=thioredoxin-like protein, putative | location=Pf3D7_14_v3:797709-800135(-) | protein_length=671 | sequence_SO=chromosome | SO=protein_coding | is_pseudo=false	0.00019	0.00041	0	0.0003	8.1	2.2408	0.862614	0.123798	0.652027	8	23	X	13
PF3D7_1323700	| transcript=PF3D7_1323700.1 | gene=PF3D7_1323700 | organism=Plasmodium_falciparum_3D7 | gene_product=glideosome associated protein with multiple membrane spans 1 | transcript_product=glideosome associated protein with multiple membrane spans 1 | location=Pf3D7_13_v3:982611-983801(+) | protein_length=303 | sequence_SO=chromosome | SO=protein_coding | is_pseudo=false	0.00059	0	0	0	8.2	2.2407	0.862679	0.123798	0.652027	11	X	X	X
PF3D7_1438100	| transcript=PF3D7_1438100.1 | gene=PF3D7_1438100 | organism=Plasmodium_falciparum_3D7 | gene_product=translocation protein SEC62, putative | transcript_product=translocation protein SEC62, putative | location=Pf3D7_14_v3:1541359-1542872(-) | protein_length=377 | sequence_SO=chromosome | SO=protein_coding | is_pseudo=false	0.00013	6e-05	0	0.00012	7.1	2.23	0.869602	0.1255	0.651669	3	2	X	3
PF3D7_1412700	| transcript=PF3D7_1412700.1 | gene=PF3D7_1412700 | organism=Plasmodium_falciparum_3D7 | gene_product=AAA family ATPase, putative | transcript_product=AAA family ATPase, putative | location=Pf3D7_14_v3:512363-516022(+) | protein_length=1219 | sequence_SO=chromosome | SO=protein_coding | is_pseudo=false	4e-05	0	0	0	7	2.229	0.87025	0.1255	0.65167	3	X	X	X
PF3D7_0822800	| transcript=PF3D7_0822800.1 | gene=PF3D7_0822800 | organism=Plasmodium_falciparum_3D7 | gene_product=U5 small nuclear ribonucleoprotein 40 kDa protein, putative | transcript_product=U5 small nuclear ribonucleoprotein 40 kDa protein, putative | location=Pf3D7_08_v3:1005836-1006810(+) | protein_length=324 | sequence_SO=chromosome | SO=protein_coding | is_pseudo=false	0.0003	7e-05	0.00022	0	8	2.2287	0.870444	0.125499	0.65167	6	2	4	X
PF3D7_1431600	| transcript=PF3D7_1431600.1 | gene=PF3D7_1431600 | organism=Plasmodium_falciparum_3D7 | gene_product=succinyl-CoA ligase [ADP-forming] subunit beta, putative | transcript_product=succinyl-CoA ligase [ADP-forming] subunit beta, putative | location=Pf3D7_14_v3:1244018-1245406(+) | protein_length=462 | sequence_SO=chromosome | SO=protein_coding | is_pseudo=false	0.00017	0	0	0	7.7	2.2255	0.872517	0.125496	0.651671	5	X	X	X
PF3D7_1010700	| transcript=PF3D7_1010700.1 | gene=PF3D7_1010700 | organism=Plasmodium_falciparum_3D7 | gene_product=dolichyl-phosphate-mannose--protein mannosyltransferase, putative | transcript_product=dolichyl-phosphate-mannose--protein mannosyltransferase, putative | location=Pf3D7_10_v3:422961-424365(+) | protein_length=223 | sequence_SO=chromosome | SO=protein_coding | is_pseudo=false	0.00058	0.00027	0	0.00063	7.8	2.2253	0.872647	0.125496	0.651671	8	5	X	9
PF3D7_1142500	| transcript=PF3D7_1142500.1 | gene=PF3D7_1142500 | organism=Plasmodium_falciparum_3D7 | gene_product=60S ribosomal protein L28 | transcript_product=60S ribosomal protein L28 | location=Pf3D7_11_v3:1705696-1706573(-) | protein_length=127 | sequence_SO=chromosome | SO=protein_coding | is_pseudo=false	0.00076	0.00037	0	0.00098	8.1	2.2125	0.880949	0.127211	0.651298	6	4	X	8
PF3D7_0611800	| transcript=PF3D7_0611800.1 | gene=PF3D7_0611800 | organism=Plasmodium_falciparum_3D7 | gene_product=conserved Plasmodium protein, unknown function | transcript_product=conserved Plasmodium protein, unknown function | location=Pf3D7_06_v3:490858-501140(-) | protein_length=3248 | sequence_SO=chromosome | SO=protein_coding | is_pseudo=false	2e-05	1e-05	0	2e-05	6.6	2.2076	0.884131	0.128944	0.650903	5	4	X	5
PF3D7_0724700	| transcript=PF3D7_0724700.1 | gene=PF3D7_0724700 | organism=Plasmodium_falciparum_3D7 | gene_product=conserved Plasmodium protein, unknown function | transcript_product=conserved Plasmodium protein, unknown function | location=Pf3D7_07_v3:1034969-1046109(-) | protein_length=3489 | sequence_SO=chromosome | SO=protein_coding | is_pseudo=false	0	1e-05	0	0	6.8	2.2062	0.885041	0.128944	0.650905	X	2	X	X
PF3D7_1416100	| transcript=PF3D7_1416100.1 | gene=PF3D7_1416100 | organism=Plasmodium_falciparum_3D7 | gene_product=protein SEY1, putative | transcript_product=protein SEY1, putative | location=Pf3D7_14_v3:645641-648454(-) | protein_length=937 | sequence_SO=chromosome | SO=protein_coding | is_pseudo=false	0.00014	9e-05	0	0.00025	7.2	2.1993	0.889527	0.12894	0.650909	8	7	X	15
PF3D7_0922100	| transcript=PF3D7_0922100.1 | gene=PF3D7_0922100 | organism=Plasmodium_falciparum_3D7 | gene_product=ubiquitin-like protein, putative | transcript_product=ubiquitin-like protein, putative | location=Pf3D7_09_v3:895415-900304(+) | protein_length=1542 | sequence_SO=chromosome | SO=protein_coding | is_pseudo=false	9e-05	0.00025	0	0.00019	7	2.1933	0.89343	0.130687	0.650499	9	32	X	19
PF3D7_1123500	| transcript=PF3D7_1123500.1 | gene=PF3D7_1123500 | organism=Plasmodium_falciparum_3D7 | gene_product=golgi protein 2 | transcript_product=golgi protein 2 | location=Pf3D7_11_v3:929354-933364(-) | protein_length=1336 | sequence_SO=chromosome | SO=protein_coding | is_pseudo=false	5e-05	3e-05	0	2e-05	7.6	2.1925	0.893951	0.130686	0.650499	4	3	X	2
PF3D7_0505200	| transcript=PF3D7_0505200.1 | gene=PF3D7_0505200 | organism=Plasmodium_falciparum_3D7 | gene_product=actin-like protein, putative | transcript_product=actin-like protein, putative | location=Pf3D7_05_v3:230695-232392(+) | protein_length=565 | sequence_SO=chromosome | SO=protein_coding | is_pseudo=false	0	4e-05	0	0	7.1	2.1917	0.894472	0.130686	0.6505	X	2	X	X
PF3D7_0703200	| transcript=PF3D7_0703200.1 | gene=PF3D7_0703200 | organism=Plasmodium_falciparum_3D7 | gene_product=conserved Plasmodium protein, unknown function | transcript_product=conserved Plasmodium protein, unknown function | location=Pf3D7_07_v3:122513-127135(-) | protein_length=1540 | sequence_SO=chromosome | SO=protein_coding | is_pseudo=false	0.00013	2e-05	0	2e-05	7.7	2.1834	0.899878	0.13068	0.650505	12	3	X	2
PF3D7_0107500	| transcript=PF3D7_0107500.1 | gene=PF3D7_0107500 | organism=Plasmodium_falciparum_3D7 | gene_product=NPC1-related protein, putative | transcript_product=NPC1-related protein, putative | location=Pf3D7_01_v3:304362-309257(-) | protein_length=1470 | sequence_SO=chromosome | SO=protein_coding | is_pseudo=false	3e-05	6e-05	0	4e-05	7.2	2.1783	0.903202	0.132443	0.650078	3	8	X	4
PF3D7_1233600	| transcript=PF3D7_1233600.1 | gene=PF3D7_1233600 | organism=Plasmodium_falciparum_3D7 | gene_product=asparagine and aspartate rich protein 1 | transcript_product=asparagine and aspartate rich protein 1 | location=Pf3D7_12_v3:1385707-1402218(+) | protein_length=5439 | sequence_SO=chromosome | SO=protein_coding | is_pseudo=false	0	0	0	0	6.6	2.1724	0.90705	0.132439	0.650082	X	2	X	X
PF3D7_0830400	| transcript=PF3D7_0830400.1 | gene=PF3D7_0830400 | organism=Plasmodium_falciparum_3D7 | gene_product=CRA domain-containing protein, putative | transcript_product=CRA domain-containing protein, putative | location=Pf3D7_08_v3:1294022-1294722(+) | protein_length=137 | sequence_SO=chromosome | SO=protein_coding | is_pseudo=false	0.0046	0.00035	0	0.00091	9.6	2.1705	0.90829	0.132437	0.650083	39	4	X	8
PF3D7_1220900	| transcript=PF3D7_1220900.1 | gene=PF3D7_1220900 | organism=Plasmodium_falciparum_3D7 | gene_product=heterochromatin protein 1 | transcript_product=heterochromatin protein 1 | location=Pf3D7_12_v3:831252-832052(-) | protein_length=266 | sequence_SO=chromosome | SO=protein_coding | is_pseudo=false	0.00061	0.00063	0.00027	0.00035	0.7	2.1702	0.908486	0.132437	0.650083	10	14	4	6
PF3D7_1103700	| transcript=PF3D7_1103700.1 | gene=PF3D7_1103700 | organism=Plasmodium_falciparum_3D7 | gene_product=casein kinase II beta chain | transcript_product=casein kinase II beta chain | location=Pf3D7_11_v3:160115-160852(+) | protein_length=245 | sequence_SO=chromosome | SO=protein_coding | is_pseudo=false	0.00013	0.00034	0	0.00013	8.1	2.169	0.909269	0.132435	0.650083	2	7	X	2
PF3D7_1109900	| transcript=PF3D7_1109900.1 | gene=PF3D7_1109900 | organism=Plasmodium_falciparum_3D7 | gene_product=60S ribosomal protein L36 | transcript_product=60S ribosomal protein L36 | location=Pf3D7_11_v3:397124-397775(+) | protein_length=112 | sequence_SO=chromosome | SO=protein_coding | is_pseudo=false	0.00029	0	0	0	7.7	2.1654	0.911618	0.134214	0.649639	2	X	X	X
PF3D7_0321500	| transcript=PF3D7_0321500.1 | gene=PF3D7_0321500 | organism=Plasmodium_falciparum_3D7 | gene_product=peptidase, putative | transcript_product=peptidase, putative | location=Pf3D7_03_v3:896546-899770(-) | protein_length=1074 | sequence_SO=chromosome | SO=protein_coding | is_pseudo=false	0.00018	2e-05	0	0.00017	7.6	2.1568	0.917236	0.134208	0.649645	12	2	X	12
PF3D7_1117700	| transcript=PF3D7_1117700.1 | gene=PF3D7_1117700 | organism=Plasmodium_falciparum_3D7 | gene_product=GTP-binding nuclear protein RAN/TC4 | transcript_product=GTP-binding nuclear protein RAN/TC4 | location=Pf3D7_11_v3:670711-671515(-) | protein_length=214 | sequence_SO=chromosome | SO=protein_coding | is_pseudo=false	0.00589	0.00539	0.0017	0.00247	1	2.1568	0.917236	0.134208	0.649645	78	97	20	34
PF3D7_0709300	| transcript=PF3D7_0709300.1 | gene=PF3D7_0709300 | organism=Plasmodium_falciparum_3D7 | gene_product=Cg2 protein | transcript_product=Cg2 protein | location=Pf3D7_07_v3:413560-421749(-) | protein_length=2729 | sequence_SO=chromosome | SO=protein_coding | is_pseudo=false	1e-05	0	0	0	7.2	2.1565	0.917432	0.134207	0.649645	2	X	X	X
PF3D7_1311900	| transcript=PF3D7_1311900.1 | gene=PF3D7_1311900 | organism=Plasmodium_falciparum_3D7 | gene_product=V-type proton ATPase catalytic subunit A | transcript_product=V-type proton ATPase catalytic subunit A | location=Pf3D7_13_v3:507900-509735(+) | protein_length=611 | sequence_SO=chromosome | SO=protein_coding | is_pseudo=false	8e-05	8e-05	0	5e-05	8	2.1563	0.917563	0.134207	0.649645	3	4	X	2
PF3D7_1016400	| transcript=PF3D7_1016400.1 | gene=PF3D7_1016400 | organism=Plasmodium_falciparum_3D7 | gene_product=serine/threonine protein kinase, FIKK family | transcript_product=serine/threonine protein kinase, FIKK family | location=Pf3D7_10_v3:656709-659027(-) | protein_length=609 | sequence_SO=chromosome | SO=protein_coding | is_pseudo=false	0.00013	6e-05	0	0.00028	7.5	2.1502	0.92155	0.135998	0.649186	5	3	X	11
PF3D7_1441400	| transcript=PF3D7_1441400.1 | gene=PF3D7_1441400 | organism=Plasmodium_falciparum_3D7 | gene_product=FACT complex subunit SSRP1, putative | transcript_product=FACT complex subunit SSRP1, putative | location=Pf3D7_14_v3:1690993-1692513(+) | protein_length=506 | sequence_SO=chromosome | SO=protein_coding | is_pseudo=false	0.00035	0.00021	0	9e-05	8	2.15	0.921681	0.135998	0.649186	11	9	X	3
PF3D7_0217800	| transcript=PF3D7_0217800.1 | gene=PF3D7_0217800 | organism=Plasmodium_falciparum_3D7 | gene_product=40S ribosomal protein S26 | transcript_product=40S ribosomal protein S26 | location=Pf3D7_02_v3:734272-734595(+) | protein_length=107 | sequence_SO=chromosome | SO=protein_coding | is_pseudo=false	0.00136	0	0	0	8.1	2.1361	0.930775	0.137796	0.648715	9	X	X	X
PF3D7_1138800	| transcript=PF3D7_1138800.1 | gene=PF3D7_1138800 | organism=Plasmodium_falciparum_3D7 | gene_product=WD repeat-containing protein, putative | transcript_product=WD repeat-containing protein, putative | location=Pf3D7_11_v3:1533252-1539856(-) | protein_length=1920 | sequence_SO=chromosome | SO=protein_coding | is_pseudo=false	3e-05	0	0	0	7	2.1352	0.931364	0.137796	0.648715	3	X	X	X
PF3D7_0306800	| transcript=PF3D7_0306800.1 | gene=PF3D7_0306800 | organism=Plasmodium_falciparum_3D7 | gene_product=T-complex protein 1 subunit beta | transcript_product=T-complex protein 1 subunit beta | location=Pf3D7_03_v3:306108-307984(-) | protein_length=533 | sequence_SO=chromosome | SO=protein_coding | is_pseudo=false	0	7e-05	0	0	6.9	2.1312	0.933983	0.137793	0.648718	X	3	X	X
PF3D7_1361800	| transcript=PF3D7_1361800.1 | gene=PF3D7_1361800 | organism=Plasmodium_falciparum_3D7 | gene_product=glideosome-associated connector | transcript_product=glideosome-associated connector | location=Pf3D7_13_v3:2473530-2481626(+) | protein_length=2605 | sequence_SO=chromosome | SO=protein_coding | is_pseudo=false	0	3e-05	0	0	7.1	2.1302	0.934638	0.137792	0.648718	X	7	X	X
PF3D7_1115300	0 genes:. 2 proteins in this group did not match any genes. PF3D7_1115300:| transcript=PF3D7_1115300.1 | gene=PF3D7_1115300 | organism=Plasmodium_falciparum_3D7 | gene_product=cysteine proteinase falcipain 2b | transcript_product=cysteine proteinase falcipain 2b | location=Pf3D7_11_v3:581250-582698(-) | protein_length=482 | sequence_SO=chromosome | SO=protein_coding | is_pseudo=false ;PF3D7_11157…	0	0.00027	0	0	7.8	2.129	0.935424	0.13779	0.648719	X	11	X	X
PF3D7_0730900	| transcript=PF3D7_0730900.1 | gene=PF3D7_0730900 | organism=Plasmodium_falciparum_3D7 | gene_product=EMP1-trafficking protein | transcript_product=EMP1-trafficking protein | location=Pf3D7_07_v3:1325375-1331813(+) | protein_length=2110 | sequence_SO=chromosome | SO=protein_coding | is_pseudo=false	2e-05	1e-05	3e-05	0	7.3	2.1255	0.937716	0.139609	0.648223	2	2	4	X
PF3D7_1229300	| transcript=PF3D7_1229300.1 | gene=PF3D7_1229300 | organism=Plasmodium_falciparum_3D7 | gene_product=conserved Plasmodium protein, unknown function | transcript_product=conserved Plasmodium protein, unknown function | location=Pf3D7_12_v3:1204991-1207963(+) | protein_length=990 | sequence_SO=chromosome | SO=protein_coding | is_pseudo=false	0.00021	0.00019	0	3e-05	8.1	2.1189	0.942041	0.139606	0.648229	13	16	X	2
PF3D7_0726500	| transcript=PF3D7_0726500.1 | gene=PF3D7_0726500 | organism=Plasmodium_falciparum_3D7 | gene_product=ubiquitin carboxyl-terminal hydrolase, putative | transcript_product=ubiquitin carboxyl-terminal hydrolase, putative | location=Pf3D7_07_v3:1126556-1136577(-) | protein_length=3183 | sequence_SO=chromosome | SO=protein_coding | is_pseudo=false	6e-05	4e-05	0	1e-05	7.5	2.1085	0.948859	0.141435	0.647721	12	11	X	3
PF3D7_0526500	| transcript=PF3D7_0526500.1 | gene=PF3D7_0526500 | organism=Plasmodium_falciparum_3D7 | gene_product=conserved Plasmodium protein, unknown function | transcript_product=conserved Plasmodium protein, unknown function | location=Pf3D7_05_v3:1090930-1095084(+) | protein_length=1384 | sequence_SO=chromosome | SO=protein_coding | is_pseudo=false	4e-05	0	0	0	6.8	2.1083	0.94899	0.141435	0.647721	3	X	X	X
PF3D7_1333600	| transcript=PF3D7_1333600.1 | gene=PF3D7_1333600 | organism=Plasmodium_falciparum_3D7 | gene_product=U3 small nucleolar RNA-associated protein 4, putative | transcript_product=U3 small nucleolar RNA-associated protein 4, putative | location=Pf3D7_13_v3:1373390-1377397(-) | protein_length=1335 | sequence_SO=chromosome | SO=protein_coding | is_pseudo=false	0.00016	0	0	0	8.2	2.1052	0.951023	0.141433	0.647723	13	X	X	X
PF3D7_1312600	| transcript=PF3D7_1312600.1 | gene=PF3D7_1312600 | organism=Plasmodium_falciparum_3D7 | gene_product=2-oxoisovalerate dehydrogenase subunit alpha, mitochondrial, putative | transcript_product=2-oxoisovalerate dehydrogenase subunit alpha, mitochondrial, putative | location=Pf3D7_13_v3:529976-531265(+) | protein_length=429 | sequence_SO=chromosome | SO=protein_coding | is_pseudo=false	0.00023	0	0	0	7.8	2.0988	0.955221	0.141425	0.647725	6	X	X	X
PF3D7_0103900	| transcript=PF3D7_0103900.1 | gene=PF3D7_0103900 | organism=Plasmodium_falciparum_3D7 | gene_product=parasite-infected erythrocyte surface protein | transcript_product=parasite-infected erythrocyte surface protein | location=Pf3D7_01_v3:172864-174591(+) | protein_length=575 | sequence_SO=chromosome | SO=protein_coding | is_pseudo=false	0.00011	0.00012	0	0.00046	7.3	2.0964	0.956796	0.143275	0.647196	4	6	X	17
PF3D7_0307100	| transcript=PF3D7_0307100.1 | gene=PF3D7_0307100 | organism=Plasmodium_falciparum_3D7 | gene_product=40S ribosomal protein S12, putative | transcript_product=40S ribosomal protein S12, putative | location=Pf3D7_03_v3:312693-313342(-) | protein_length=141 | sequence_SO=chromosome | SO=protein_coding | is_pseudo=false	0.00023	0.00025	0	0.00486	6.9	2.0943	0.958174	0.143274	0.647198	2	3	X	44
PF3D7_1406200	| transcript=PF3D7_1406200.1 | gene=PF3D7_1406200 | organism=Plasmodium_falciparum_3D7 | gene_product=transcription elongation factor SPT6, putative | transcript_product=transcription elongation factor SPT6, putative | location=Pf3D7_14_v3:217845-226307(+) | protein_length=2820 | sequence_SO=chromosome | SO=protein_coding | is_pseudo=false	5e-05	2e-05	0	3e-05	7.2	2.093	0.959027	0.143274	0.647199	9	5	X	6
PF3D7_0528100	| transcript=PF3D7_0528100.1 | gene=PF3D7_0528100 | organism=Plasmodium_falciparum_3D7 | gene_product=AP-1 complex subunit beta, putative | transcript_product=AP-1 complex subunit beta, putative | location=Pf3D7_05_v3:1157840-1161553(-) | protein_length=929 | sequence_SO=chromosome | SO=protein_coding | is_pseudo=false	0.0001	4e-05	0	3e-05	7.3	2.0904	0.960733	0.143272	0.647201	6	3	X	2
PF3D7_1017900	| transcript=PF3D7_1017900.1 | gene=PF3D7_1017900 | organism=Plasmodium_falciparum_3D7 | gene_product=26S proteasome regulatory subunit p55, putative | transcript_product=26S proteasome regulatory subunit p55, putative | location=Pf3D7_10_v3:715878-717437(+) | protein_length=467 | sequence_SO=chromosome | SO=protein_coding | is_pseudo=false	7e-05	8e-05	8e-05	0	7.3	2.0902	0.960865	0.143271	0.647201	2	3	2	X
PF3D7_0409400	| transcript=PF3D7_0409400.1 | gene=PF3D7_0409400 | organism=Plasmodium_falciparum_3D7 | gene_product=chaperone protein DnaJ | transcript_product=chaperone protein DnaJ | location=Pf3D7_04_v3:446000-448018(+) | protein_length=672 | sequence_SO=chromosome | SO=protein_coding | is_pseudo=false	7e-05	0.00011	0	7e-05	8.3	2.0864	0.963358	0.143267	0.647202	3	6	X	3
PF3D7_0606700	| transcript=PF3D7_0606700.1 | gene=PF3D7_0606700 | organism=Plasmodium_falciparum_3D7 | gene_product=coatomer alpha subunit, putative | transcript_product=coatomer alpha subunit, putative | location=Pf3D7_06_v3:282049-287017(+) | protein_length=1512 | sequence_SO=chromosome | SO=protein_coding | is_pseudo=false	7e-05	0.00013	0	8e-05	7.9	2.0742	0.971368	0.145123	0.646662	7	16	X	8
PF3D7_1038000	0 genes:. 2 proteins in this group did not match any genes. PF3D7_1038000:| transcript=PF3D7_1038000.1 | gene=PF3D7_1038000 | organism=Plasmodium_falciparum_3D7 | gene_product=antigen UB05 | transcript_product=antigen UB05 | location=Pf3D7_10_v3:1505835-1506896(+) | protein_length=119 | sequence_SO=chromosome | SO=protein_coding | is_pseudo=false ;PF3D7_1038000.2-p1:| transcript=PF3D7_1038000.2 |…	0	0.0004	0	0	8	2.0717	0.973009	0.145119	0.646662	X	4	X	X
PF3D7_1133800	| transcript=PF3D7_1133800.1 | gene=PF3D7_1133800 | organism=Plasmodium_falciparum_3D7 | gene_product=RNA (uracil-5-)methyltransferase, putative | transcript_product=RNA (uracil-5-)methyltransferase, putative | location=Pf3D7_11_v3:1309024-1311793(+) | protein_length=857 | sequence_SO=chromosome | SO=protein_coding | is_pseudo=false	4e-05	0	0	0	7	2.0709	0.973535	0.146996	0.646097	2	X	X	X
PF3D7_0623100	| transcript=PF3D7_0623100.1 | gene=PF3D7_0623100 | organism=Plasmodium_falciparum_3D7 | gene_product=nuclear polyadenylated RNA-binding protein NAB2, putative | transcript_product=nuclear polyadenylated RNA-binding protein NAB2, putative | location=Pf3D7_06_v3:939660-943720(-) | protein_length=786 | sequence_SO=chromosome | SO=protein_coding | is_pseudo=false	6e-05	3e-05	0	6e-05	7.4	2.0692	0.974651	0.146996	0.646099	3	2	X	3
PF3D7_0508800	| transcript=PF3D7_0508800.1 | gene=PF3D7_0508800 | organism=Plasmodium_falciparum_3D7 | gene_product=single-stranded DNA-binding protein | transcript_product=single-stranded DNA-binding protein | location=Pf3D7_05_v3:363588-364442(-) | protein_length=284 | sequence_SO=chromosome | SO=protein_coding | is_pseudo=false	0.00028	0.00017	0	0.00027	7.7	2.0628	0.978855	0.146992	0.646103	5	4	X	5
PF3D7_1464500	| transcript=PF3D7_1464500.1 | gene=PF3D7_1464500 | organism=Plasmodium_falciparum_3D7 | gene_product=conserved Plasmodium membrane protein, unknown function | transcript_product=conserved Plasmodium membrane protein, unknown function | location=Pf3D7_14_v3:2607292-2617621(+) | protein_length=3251 | sequence_SO=chromosome | SO=protein_coding | is_pseudo=false	0	1e-05	0	0	5.7	2.0605	0.980365	0.14699	0.646104	X	2	X	X
PF3D7_1018300	| transcript=PF3D7_1018300.1 | gene=PF3D7_1018300 | organism=Plasmodium_falciparum_3D7 | gene_product=peptidase, putative | transcript_product=peptidase, putative | location=Pf3D7_10_v3:729809-732856(-) | protein_length=1015 | sequence_SO=chromosome | SO=protein_coding | is_pseudo=false	0	2e-05	0	0	6.8	2.0573	0.982467	0.148877	0.645522	X	2	X	X
PF3D7_0827900	| transcript=PF3D7_0827900.1 | gene=PF3D7_0827900 | organism=Plasmodium_falciparum_3D7 | gene_product=protein disulfide isomerase | transcript_product=protein disulfide isomerase | location=Pf3D7_08_v3:1206788-1208394(-) | protein_length=483 | sequence_SO=chromosome | SO=protein_coding | is_pseudo=false	0.00097	0.00101	0.00053	0.00055	0.6	2.0571	0.982598	0.148877	0.645522	29	41	14	17
PF3D7_1008000	| transcript=PF3D7_1008000.1 | gene=PF3D7_1008000 | organism=Plasmodium_falciparum_3D7 | gene_product=histone deacetylase 2 | transcript_product=histone deacetylase 2 | location=Pf3D7_10_v3:321011-328150(+) | protein_length=2379 | sequence_SO=chromosome | SO=protein_coding | is_pseudo=false	1e-05	2e-05	0	1e-05	7	2.0521	0.985883	0.148876	0.645526	2	4	X	2
PF3D7_1466400	| transcript=PF3D7_1466400.1 | gene=PF3D7_1466400 | organism=Plasmodium_falciparum_3D7 | gene_product=AP2 domain transcription factor AP2-EXP | transcript_product=AP2 domain transcription factor AP2-EXP | location=Pf3D7_14_v3:2714844-2717285(-) | protein_length=813 | sequence_SO=chromosome | SO=protein_coding | is_pseudo=false	0.00133	0.0007	0.00022	0.00044	1.1	2.0347	0.997312	0.150767	0.644936	67	48	10	23
PF3D7_0629200	| transcript=PF3D7_0629200.1 | gene=PF3D7_0629200 | organism=Plasmodium_falciparum_3D7 | gene_product=DnaJ protein, putative | transcript_product=DnaJ protein, putative | location=Pf3D7_06_v3:1199853-1200995(-) | protein_length=380 | sequence_SO=chromosome | SO=protein_coding | is_pseudo=false	0.00059	0.00041	0.00024	0.00025	0.7	2.0307	0.999938	0.150762	0.644937	14	13	5	6
PF3D7_0722200	| transcript=PF3D7_0722200.1 | gene=PF3D7_0722200 | organism=Plasmodium_falciparum_3D7 | gene_product=rhoptry-associated leucine zipper-like protein 1 | transcript_product=rhoptry-associated leucine zipper-like protein 1 | location=Pf3D7_07_v3:946363-948612(+) | protein_length=749 | sequence_SO=chromosome | SO=protein_coding | is_pseudo=false	0.00019	0.0004	0.00012	8e-05	1	2.0268	1	0.152679	0.644322	9	25	5	4
PF3D7_1008800	| transcript=PF3D7_1008800.1 | gene=PF3D7_1008800 | organism=Plasmodium_falciparum_3D7 | gene_product=nucleolar protein 5, putative | transcript_product=nucleolar protein 5, putative | location=Pf3D7_10_v3:365737-367146(-) | protein_length=469 | sequence_SO=chromosome | SO=protein_coding | is_pseudo=false	0.00038	0.00063	0	0.0004	8.2	2.0074	1	0.154596	0.643697	11	25	X	12
PF3D7_1224000	| transcript=PF3D7_1224000.1 | gene=PF3D7_1224000 | organism=Plasmodium_falciparum_3D7 | gene_product=GTP cyclohydrolase 1 | transcript_product=GTP cyclohydrolase 1 | location=Pf3D7_12_v3:974372-975541(+) | protein_length=389 | sequence_SO=chromosome | SO=protein_coding | is_pseudo=false	0.00012	9e-05	0	8e-05	7.5	2.0068	1	0.154595	0.643697	3	3	X	2
PF3D7_1115400	| transcript=PF3D7_1115400.1 | gene=PF3D7_1115400 | organism=Plasmodium_falciparum_3D7 | gene_product=cysteine proteinase falcipain 3 | transcript_product=cysteine proteinase falcipain 3 | location=Pf3D7_11_v3:584328-585806(-) | protein_length=492 | sequence_SO=chromosome | SO=protein_coding | is_pseudo=false	0.00013	0	0	0	7.1	2.0033	1	0.154591	0.643698	4	X	X	X
PF3D7_0217500	| transcript=PF3D7_0217500.1 | gene=PF3D7_0217500 | organism=Plasmodium_falciparum_3D7 | gene_product=calcium-dependent protein kinase 1 | transcript_product=calcium-dependent protein kinase 1 | location=Pf3D7_02_v3:720437-722661(+) | protein_length=524 | sequence_SO=chromosome | SO=protein_coding | is_pseudo=false	0	0.00011	0	0	7.6	1.9963	1	0.156532	0.643049	X	5	X	X
PF3D7_1414400	| transcript=PF3D7_1414400.1 | gene=PF3D7_1414400 | organism=Plasmodium_falciparum_3D7 | gene_product=serine/threonine protein phosphatase PP1 | transcript_product=serine/threonine protein phosphatase PP1 | location=Pf3D7_14_v3:575496-577055(+) | protein_length=304 | sequence_SO=chromosome | SO=protein_coding | is_pseudo=false	0	4e-05	0	0	6.6	1.9946	1	0.156531	0.64305	X	1	X	X
PF3D7_0629700	| transcript=PF3D7_0629700.1 | gene=PF3D7_0629700 | organism=Plasmodium_falciparum_3D7 | gene_product=SET domain protein, putative | transcript_product=SET domain protein, putative | location=Pf3D7_06_v3:1221941-1242922(+) | protein_length=6753 | sequence_SO=chromosome | SO=protein_coding | is_pseudo=false	1e-05	0	0	0	6.1	1.9932	1	0.15653	0.643051	5	X	X	X
PF3D7_1352700	| transcript=PF3D7_1352700.1 | gene=PF3D7_1352700 | organism=Plasmodium_falciparum_3D7 | gene_product=intron-binding protein aquarius, putative | transcript_product=intron-binding protein aquarius, putative | location=Pf3D7_13_v3:2101485-2109086(+) | protein_length=2533 | sequence_SO=chromosome | SO=protein_coding | is_pseudo=false	2e-05	0	0	0	6.8	1.9907	1	0.156526	0.643051	3	X	X	X
PF3D7_1034000	| transcript=PF3D7_1034000.1 | gene=PF3D7_1034000 | organism=Plasmodium_falciparum_3D7 | gene_product=Sec1 family protein, putative | transcript_product=Sec1 family protein, putative | location=Pf3D7_10_v3:1359318-1361309(-) | protein_length=663 | sequence_SO=chromosome | SO=protein_coding | is_pseudo=false	5e-05	4e-05	0	5e-05	7.1	1.9845	1	0.158481	0.642384	2	2	X	2
PF3D7_1409600	| transcript=PF3D7_1409600.1 | gene=PF3D7_1409600 | organism=Plasmodium_falciparum_3D7 | gene_product=conserved Plasmodium protein, unknown function | transcript_product=conserved Plasmodium protein, unknown function | location=Pf3D7_14_v3:374800-377106(+) | protein_length=768 | sequence_SO=chromosome | SO=protein_coding | is_pseudo=false	4e-05	0	0	0	6.3	1.9843	1	0.158481	0.642384	2	X	X	X
PF3D7_0503300	| transcript=PF3D7_0503300.1 | gene=PF3D7_0503300 | organism=Plasmodium_falciparum_3D7 | gene_product=serine/arginine-rich splicing factor 12 | transcript_product=serine/arginine-rich splicing factor 12 | location=Pf3D7_05_v3:135004-135930(-) | protein_length=308 | sequence_SO=chromosome | SO=protein_coding | is_pseudo=false	0.0001	8e-05	0	0.0001	7.8	1.9782	1	0.158475	0.642387	2	2	X	2
PF3D7_1417500	| transcript=PF3D7_1417500.1 | gene=PF3D7_1417500 | organism=Plasmodium_falciparum_3D7 | gene_product=H/ACA ribonucleoprotein complex subunit 4, putative | transcript_product=H/ACA ribonucleoprotein complex subunit 4, putative | location=Pf3D7_14_v3:726979-728379(-) | protein_length=466 | sequence_SO=chromosome | SO=protein_coding | is_pseudo=false	0.00024	0.00015	8e-05	0.0001	0.8	1.9769	1	0.158474	0.642387	7	6	2	3
PF3D7_1031300	| transcript=PF3D7_1031300.1 | gene=PF3D7_1031300 | organism=Plasmodium_falciparum_3D7 | gene_product=conserved Plasmodium protein, unknown function | transcript_product=conserved Plasmodium protein, unknown function | location=Pf3D7_10_v3:1260310-1263069(+) | protein_length=919 | sequence_SO=chromosome | SO=protein_coding | is_pseudo=false	0	8e-05	0	0	7.7	1.9762	1	0.158473	0.642387	X	6	X	X
PF3D7_0711000	| transcript=PF3D7_0711000.1 | gene=PF3D7_0711000 | organism=Plasmodium_falciparum_3D7 | gene_product=AAA family ATPase, CDC48 subfamily | transcript_product=AAA family ATPase, CDC48 subfamily | location=Pf3D7_07_v3:487281-490970(-) | protein_length=1229 | sequence_SO=chromosome | SO=protein_coding | is_pseudo=false	7e-05	5e-05	0	5e-05	7.3	1.9752	1	0.160443	0.641697	5.1	5.1	0	4
PF3D7_0503400	| transcript=PF3D7_0503400.1 | gene=PF3D7_0503400 | organism=Plasmodium_falciparum_3D7 | gene_product=actin-depolymerizing factor 1 | transcript_product=actin-depolymerizing factor 1 | location=Pf3D7_05_v3:140710-141471(+) | protein_length=122 | sequence_SO=chromosome | SO=protein_coding | is_pseudo=false	0	0.00049	0	0	7.9	1.9723	1	0.160442	0.6417	X	5	X	X
PF3D7_0306900	| transcript=PF3D7_0306900.1 | gene=PF3D7_0306900 | organism=Plasmodium_falciparum_3D7 | gene_product=40S ribosomal protein S23, putative | transcript_product=40S ribosomal protein S23, putative | location=Pf3D7_03_v3:310652-311805(+) | protein_length=145 | sequence_SO=chromosome | SO=protein_coding | is_pseudo=false	0.00045	0.00271	0.00025	0.00021	1.6	1.9676	1	0.160439	0.641703	4	33	2	2
PF3D7_1321700	| transcript=PF3D7_1321700.1 | gene=PF3D7_1321700 | organism=Plasmodium_falciparum_3D7 | gene_product=splicing factor 1 | transcript_product=splicing factor 1 | location=Pf3D7_13_v3:902383-905166(+) | protein_length=864 | sequence_SO=chromosome | SO=protein_coding | is_pseudo=false	9e-05	0	0	0	7.6	1.9638	1	0.160435	0.641704	5	X	X	X
PF3D7_0525800	| transcript=PF3D7_0525800.1 | gene=PF3D7_0525800 | organism=Plasmodium_falciparum_3D7 | gene_product=inner membrane complex protein 1g, putative | transcript_product=inner membrane complex protein 1g, putative | location=Pf3D7_05_v3:1071247-1072149(+) | protein_length=300 | sequence_SO=chromosome | SO=protein_coding | is_pseudo=false	0.00231	0.00063	0	0.00036	7.7	1.9482	1	0.162406	0.641004	43	16	X	7
PF3D7_0416900	| transcript=PF3D7_0416900.1 | gene=PF3D7_0416900 | organism=Plasmodium_falciparum_3D7 | gene_product=conserved Plasmodium protein, unknown function | transcript_product=conserved Plasmodium protein, unknown function | location=Pf3D7_04_v3:732452-739872(-) | protein_length=2422 | sequence_SO=chromosome | SO=protein_coding | is_pseudo=false	1e-05	1e-05	0	1e-05	6.4	1.941	1	0.1644	0.640282	2	2	X	2
PF3D7_0703500	| transcript=PF3D7_0703500.1 | gene=PF3D7_0703500 | organism=Plasmodium_falciparum_3D7 | gene_product=erythrocyte membrane-associated antigen | transcript_product=erythrocyte membrane-associated antigen | location=Pf3D7_07_v3:135606-142505(+) | protein_length=2299 | sequence_SO=chromosome | SO=protein_coding | is_pseudo=false	4e-05	1e-05	0	2e-05	6	1.9391	1	0.164398	0.640283	6	2	X	3
PF3D7_0812400	| transcript=PF3D7_0812400.1 | gene=PF3D7_0812400 | organism=Plasmodium_falciparum_3D7 | gene_product=karyopherin alpha | transcript_product=karyopherin alpha | location=Pf3D7_08_v3:621805-623442(-) | protein_length=545 | sequence_SO=chromosome | SO=protein_coding | is_pseudo=false	0.00059	0.00028	0	9e-05	7.8	1.9305	1	0.166401	0.639542	20	13	X	3
PF3D7_1441200	| transcript=PF3D7_1441200.1 | gene=PF3D7_1441200 | organism=Plasmodium_falciparum_3D7 | gene_product=60S ribosomal protein L1, putative | transcript_product=60S ribosomal protein L1, putative | location=Pf3D7_14_v3:1678662-1679486(+) | protein_length=217 | sequence_SO=chromosome | SO=protein_coding | is_pseudo=false	0.00015	0	0	0	7.4	1.9245	1	0.166396	0.639546	2	X	X	X
PF3D7_0210100	| transcript=PF3D7_0210100.1 | gene=PF3D7_0210100 | organism=Plasmodium_falciparum_3D7 | gene_product=60S ribosomal protein L37ae, putative | transcript_product=60S ribosomal protein L37ae, putative | location=Pf3D7_02_v3:412275-412859(+) | protein_length=96 | sequence_SO=chromosome | SO=protein_coding | is_pseudo=false	0.0005	0.00025	0	0.00065	7.5	1.9244	1	0.166396	0.639546	3	2	X	4
PF3D7_1021900	| transcript=PF3D7_1021900.1 | gene=PF3D7_1021900 | organism=Plasmodium_falciparum_3D7 | gene_product=PHAX domain-containing protein, putative | transcript_product=PHAX domain-containing protein, putative | location=Pf3D7_10_v3:905473-912345(-) | protein_length=2290 | sequence_SO=chromosome | SO=protein_coding | is_pseudo=false	1e-05	2e-05	0	5e-05	7	1.9222	1	0.166393	0.639546	2	4	X	8
PF3D7_0920800	| transcript=PF3D7_0920800.1 | gene=PF3D7_0920800 | organism=Plasmodium_falciparum_3D7 | gene_product=inosine-5'-monophosphate dehydrogenase | transcript_product=inosine-5'-monophosphate dehydrogenase | location=Pf3D7_09_v3:852525-854057(-) | protein_length=510 | sequence_SO=chromosome | SO=protein_coding | is_pseudo=false	0.00016	0.00021	0	0.00015	7.4	1.9191	1	0.168413	0.638784	5	9	X	5
PF3D7_0108300	| transcript=PF3D7_0108300.1 | gene=PF3D7_0108300 | organism=Plasmodium_falciparum_3D7 | gene_product=conserved Plasmodium protein, unknown function | transcript_product=conserved Plasmodium protein, unknown function | location=Pf3D7_01_v3:337168-343833(+) | protein_length=2221 | sequence_SO=chromosome | SO=protein_coding | is_pseudo=false	3e-05	1e-05	0	1e-05	7.6	1.9102	1	0.168407	0.63879	4	2	X	2
PF3D7_0904900	| transcript=PF3D7_0904900.1 | gene=PF3D7_0904900 | organism=Plasmodium_falciparum_3D7 | gene_product=copper-transporting ATPase | transcript_product=copper-transporting ATPase | location=Pf3D7_09_v3:224875-232831(-) | protein_length=2568 | sequence_SO=chromosome | SO=protein_coding | is_pseudo=false	2e-05	3e-05	0	4e-05	7.2	1.9037	1	0.170437	0.63801	3	7	X	7
PF3D7_1357100	| transcript=PF3D7_1357100.1 | gene=PF3D7_1357100 | organism=Plasmodium_falciparum_3D7 | gene_product=elongation factor 1-alpha | transcript_product=elongation factor 1-alpha | location=Pf3D7_13_v3:2268901-2270232(+) | protein_length=443 | sequence_SO=chromosome | SO=protein_coding | is_pseudo=false	0.00345	0.00456	0.00201	0.00221	0.6	1.9031	1	0.170436	0.638011	94.8	169.8	49	63
PF3D7_1248900	| transcript=PF3D7_1248900.1 | gene=PF3D7_1248900 | organism=Plasmodium_falciparum_3D7 | gene_product=26S protease regulatory subunit 8, putative | transcript_product=26S protease regulatory subunit 8, putative | location=Pf3D7_12_v3:2002723-2004030(-) | protein_length=435 | sequence_SO=chromosome | SO=protein_coding | is_pseudo=false	0.00011	0.00011	0	7e-05	7.5	1.9016	1	0.170436	0.638012	3	4	X	2
PF3D7_1408000	| transcript=PF3D7_1408000.1 | gene=PF3D7_1408000 | organism=Plasmodium_falciparum_3D7 | gene_product=plasmepsin II | transcript_product=plasmepsin II | location=Pf3D7_14_v3:293471-294832(+) | protein_length=453 | sequence_SO=chromosome | SO=protein_coding | is_pseudo=false	0	0.00034	0	0	9	1.8956	1	0.17043	0.638015	X	13	X	X
PF3D7_0924400	| transcript=PF3D7_0924400.1 | gene=PF3D7_0924400 | organism=Plasmodium_falciparum_3D7 | gene_product=conserved Plasmodium protein, unknown function | transcript_product=conserved Plasmodium protein, unknown function | location=Pf3D7_09_v3:988977-992915(+) | protein_length=1245 | sequence_SO=chromosome | SO=protein_coding | is_pseudo=false	5e-05	0	0	0	6.3	1.8948	1	0.170429	0.638015	4	X	X	X
PF3D7_1326300	| transcript=PF3D7_1326300.1 | gene=PF3D7_1326300 | organism=Plasmodium_falciparum_3D7 | gene_product=RNA-binding protein, putative | transcript_product=RNA-binding protein, putative | location=Pf3D7_13_v3:1092394-1094187(-) | protein_length=527 | sequence_SO=chromosome | SO=protein_coding | is_pseudo=false	0.00015	9e-05	0	6e-05	8	1.8832	1	0.172468	0.637221	5	4	X	2
PF3D7_0822900	| transcript=PF3D7_0822900.1 | gene=PF3D7_0822900 | organism=Plasmodium_falciparum_3D7 | gene_product=conserved Plasmodium protein, unknown function | transcript_product=conserved Plasmodium protein, unknown function | location=Pf3D7_08_v3:1007777-1011307(-) | protein_length=1176 | sequence_SO=chromosome | SO=protein_coding | is_pseudo=false	5e-05	5e-05	0	4e-05	7.5	1.8809	1	0.172465	0.637221	4	5	X	3
PF3D7_1463200	| transcript=PF3D7_1463200.1 | gene=PF3D7_1463200 | organism=Plasmodium_falciparum_3D7 | gene_product=replication factor C subunit 3, putative | transcript_product=replication factor C subunit 3, putative | location=Pf3D7_14_v3:2570434-2571719(+) | protein_length=344 | sequence_SO=chromosome | SO=protein_coding | is_pseudo=false	0.00033	0.00028	0	0.00027	7.9	1.8754	1	0.174522	0.636405	7	8	X	6
PF3D7_0629800	| transcript=PF3D7_0629800.1 | gene=PF3D7_0629800 | organism=Plasmodium_falciparum_3D7 | gene_product=cullin-like protein, putative | transcript_product=cullin-like protein, putative | location=Pf3D7_06_v3:1243580-1247219(-) | protein_length=1129 | sequence_SO=chromosome | SO=protein_coding | is_pseudo=false	0	2e-05	0	0	7.5	1.8736	1	0.174521	0.636406	X	2	X	X
PF3D7_1214900	| transcript=PF3D7_1214900.1 | gene=PF3D7_1214900 | organism=Plasmodium_falciparum_3D7 | gene_product=conserved protein, unknown function | transcript_product=conserved protein, unknown function | location=Pf3D7_12_v3:618764-620111(+) | protein_length=245 | sequence_SO=chromosome | SO=protein_coding | is_pseudo=false	0.00013	0.0001	0	0.00013	7.7	1.8699	1	0.174517	0.636408	2	2	X	2
PF3D7_1237600	| transcript=PF3D7_1237600.1 | gene=PF3D7_1237600 | organism=Plasmodium_falciparum_3D7 | gene_product=periodic tryptophan protein 1, putative | transcript_product=periodic tryptophan protein 1, putative | location=Pf3D7_12_v3:1568605-1570569(+) | protein_length=502 | sequence_SO=chromosome | SO=protein_coding | is_pseudo=false	0	7e-05	0	0	7.1	1.8659	1	0.174512	0.636408	X	3	X	X
PF3D7_0608800	| transcript=PF3D7_0608800.1 | gene=PF3D7_0608800 | organism=Plasmodium_falciparum_3D7 | gene_product=ornithine aminotransferase | transcript_product=ornithine aminotransferase | location=Pf3D7_06_v3:362635-363879(+) | protein_length=414 | sequence_SO=chromosome | SO=protein_coding | is_pseudo=false	0.00066	0.00184	0.00026	0.00053	1.1	1.8635	1	0.176584	0.635571	17	64	6	14
PF3D7_1145100	| transcript=PF3D7_1145100.1 | gene=PF3D7_1145100 | organism=Plasmodium_falciparum_3D7 | gene_product=coatomer subunit gamma, putative | transcript_product=coatomer subunit gamma, putative | location=Pf3D7_11_v3:1783357-1786563(-) | protein_length=1068 | sequence_SO=chromosome | SO=protein_coding | is_pseudo=false	3e-05	0	0	0	6.4	1.858	1	0.17658	0.635575	2	X	X	X
PF3D7_1308200	| transcript=PF3D7_1308200.1 | gene=PF3D7_1308200 | organism=Plasmodium_falciparum_3D7 | gene_product=carbamoyl phosphate synthetase | transcript_product=carbamoyl phosphate synthetase | location=Pf3D7_13_v3:361166-368495(-) | protein_length=2375 | sequence_SO=chromosome | SO=protein_coding | is_pseudo=false	6e-05	5e-05	0	3e-05	7.1	1.8578	1	0.17658	0.635575	9	9	X	4
PF3D7_0308600	| transcript=PF3D7_0308600.1 | gene=PF3D7_0308600 | organism=Plasmodium_falciparum_3D7 | gene_product=pre-mRNA-processing factor 19, putative | transcript_product=pre-mRNA-processing factor 19, putative | location=Pf3D7_03_v3:372632-374230(+) | protein_length=532 | sequence_SO=chromosome | SO=protein_coding | is_pseudo=false	0.00052	0.00013	0	0.00023	6.9	1.8543	1	0.176576	0.635577	17	6	X	8
PF3D7_0321800	| transcript=PF3D7_0321800.1 | gene=PF3D7_0321800 | organism=Plasmodium_falciparum_3D7 | gene_product=WD repeat-containing protein, putative | transcript_product=WD repeat-containing protein, putative | location=Pf3D7_03_v3:912916-921036(+) | protein_length=2706 | sequence_SO=chromosome | SO=protein_coding | is_pseudo=false	1e-05	0	0	0	6.6	1.8529	1	0.176574	0.635577	2	X	X	X
PF3D7_1203700	| transcript=PF3D7_1203700.1 | gene=PF3D7_1203700 | organism=Plasmodium_falciparum_3D7 | gene_product=nucleosome assembly protein | transcript_product=nucleosome assembly protein | location=Pf3D7_12_v3:187146-188842(-) | protein_length=347 | sequence_SO=chromosome | SO=protein_coding | is_pseudo=false	0.00056	0.00099	0.00021	0.00045	0.9	1.8436	1	0.178653	0.634725	12	29	4	10
PF3D7_1104200	| transcript=PF3D7_1104200.1 | gene=PF3D7_1104200 | organism=Plasmodium_falciparum_3D7 | gene_product=chromatin remodeling protein | transcript_product=chromatin remodeling protein | location=Pf3D7_11_v3:182383-187223(-) | protein_length=1426 | sequence_SO=chromosome | SO=protein_coding | is_pseudo=false	6e-05	3e-05	0	2e-05	7.1	1.8427	1	0.178652	0.634725	5	3	X	2
PF3D7_0929000	| transcript=PF3D7_0929000.1 | gene=PF3D7_0929000 | organism=Plasmodium_falciparum_3D7 | gene_product=transcription initiation factor TFIID subunit 7, putative | transcript_product=transcription initiation factor TFIID subunit 7, putative | location=Pf3D7_09_v3:1161080-1162539(+) | protein_length=397 | sequence_SO=chromosome | SO=protein_coding | is_pseudo=false	0.00016	9e-05	0	0.00016	7.3	1.8407	1	0.17865	0.634726	4	3	X	4
PF3D7_0209800	| transcript=PF3D7_0209800.1 | gene=PF3D7_0209800 | organism=Plasmodium_falciparum_3D7 | gene_product=ATP-dependent RNA helicase UAP56 | transcript_product=ATP-dependent RNA helicase UAP56 | location=Pf3D7_02_v3:404281-406355(-) | protein_length=457 | sequence_SO=chromosome | SO=protein_coding | is_pseudo=false	0.00039	0.00049	0.00024	0.00024	0.6	1.8333	1	0.180741	0.633853	11	19	6	7
PF3D7_0505700	| transcript=PF3D7_0505700.1 | gene=PF3D7_0505700 | organism=Plasmodium_falciparum_3D7 | gene_product=conserved Plasmodium membrane protein, unknown function | transcript_product=conserved Plasmodium membrane protein, unknown function | location=Pf3D7_05_v3:247801-250575(-) | protein_length=924 | sequence_SO=chromosome | SO=protein_coding | is_pseudo=false	3e-05	6e-05	0	0.00013	7.6	1.8317	1	0.18074	0.633854	2	5	X	8
PF3D7_1227100	| transcript=PF3D7_1227100.1 | gene=PF3D7_1227100 | organism=Plasmodium_falciparum_3D7 | gene_product=DNA helicase 60 | transcript_product=DNA helicase 60 | location=Pf3D7_12_v3:1093543-1095771(-) | protein_length=742 | sequence_SO=chromosome | SO=protein_coding | is_pseudo=false	7e-05	5e-05	0	4e-05	7.1	1.8192	1	0.182837	0.632964	3	3	X	2
PF3D7_1331300	| transcript=PF3D7_1331300.1 | gene=PF3D7_1331300 | organism=Plasmodium_falciparum_3D7 | gene_product=signal peptidase complex catalytic subunit SEC11 | transcript_product=signal peptidase complex catalytic subunit SEC11 | location=Pf3D7_13_v3:1309177-1310006(+) | protein_length=184 | sequence_SO=chromosome | SO=protein_coding | is_pseudo=false	0.00018	0.00026	0	0.00034	8	1.8167	1	0.182835	0.632966	2	4	X	4
PF3D7_1033700	| transcript=PF3D7_1033700.1 | gene=PF3D7_1033700 | organism=Plasmodium_falciparum_3D7 | gene_product=bromodomain protein 1 | transcript_product=bromodomain protein 1 | location=Pf3D7_10_v3:1348433-1350280(+) | protein_length=488 | sequence_SO=chromosome | SO=protein_coding | is_pseudo=false	0.0001	0	0	0	7.2	1.8112	1	0.182829	0.632967	3	X	X	X
PF3D7_1004400	| transcript=PF3D7_1004400.1 | gene=PF3D7_1004400 | organism=Plasmodium_falciparum_3D7 | gene_product=RNA-binding protein, putative | transcript_product=RNA-binding protein, putative | location=Pf3D7_10_v3:207000-209642(-) | protein_length=880 | sequence_SO=chromosome | SO=protein_coding | is_pseudo=false	0.00029	0.00012	0	4e-05	8.4	1.8073	1	0.184947	0.632055	16	9	X	2
PF3D7_1433000	| transcript=PF3D7_1433000.1 | gene=PF3D7_1433000 | organism=Plasmodium_falciparum_3D7 | gene_product=H/ACA ribonucleoprotein complex subunit 3, putative | transcript_product=H/ACA ribonucleoprotein complex subunit 3, putative | location=Pf3D7_14_v3:1298639-1298977(-) | protein_length=55 | sequence_SO=chromosome | SO=protein_coding | is_pseudo=false	0.0044	0.00065	0	0.00226	7.1	1.8034	1	0.184944	0.632057	15	3	X	8
PF3D7_1003800	| transcript=PF3D7_1003800.1 | gene=PF3D7_1003800 | organism=Plasmodium_falciparum_3D7 | gene_product=U5 small nuclear ribonucleoprotein component, putative | transcript_product=U5 small nuclear ribonucleoprotein component, putative | location=Pf3D7_10_v3:172723-176430(-) | protein_length=1235 | sequence_SO=chromosome | SO=protein_coding | is_pseudo=false	0.00031	0.00016	6e-05	0.00011	1	1.8034	1	0.184944	0.632057	24	17	4	9
PF3D7_0527900	| transcript=PF3D7_0527900.1 | gene=PF3D7_0527900 | organism=Plasmodium_falciparum_3D7 | gene_product=ATP-dependent RNA helicase DDX41, putative | transcript_product=ATP-dependent RNA helicase DDX41, putative | location=Pf3D7_05_v3:1153676-1155673(+) | protein_length=665 | sequence_SO=chromosome | SO=protein_coding | is_pseudo=false	5e-05	0	0	0	6.7	1.798	1	0.184938	0.632059	2	X	X	X
PF3D7_1362700	| transcript=PF3D7_1362700.1 | gene=PF3D7_1362700 | organism=Plasmodium_falciparum_3D7 | gene_product=conserved Plasmodium protein, unknown function | transcript_product=conserved Plasmodium protein, unknown function | location=Pf3D7_13_v3:2510355-2516474(+) | protein_length=2039 | sequence_SO=chromosome | SO=protein_coding | is_pseudo=false	2e-05	1e-05	0	2e-05	6.9	1.7976	1	0.184937	0.632059	2	2	X	2
PF3D7_1229500	| transcript=PF3D7_1229500.1 | gene=PF3D7_1229500 | organism=Plasmodium_falciparum_3D7 | gene_product=T-complex protein 1 subunit gamma | transcript_product=T-complex protein 1 subunit gamma | location=Pf3D7_12_v3:1211788-1213563(+) | protein_length=542 | sequence_SO=chromosome | SO=protein_coding | is_pseudo=false	0	0.00018	0	0	7.5	1.7866	1	0.187061	0.631131	X	8	X	X
PF3D7_1235200	| transcript=PF3D7_1235200.1 | gene=PF3D7_1235200 | organism=Plasmodium_falciparum_3D7 | gene_product=V-type K+-independent H+-translocating inorganic pyrophosphatase | transcript_product=V-type K+-independent H+-translocating inorganic pyrophosphatase | location=Pf3D7_12_v3:1464219-1467572(-) | protein_length=1057 | sequence_SO=chromosome | SO=protein_coding | is_pseudo=false	9e-05	3e-05	0	0.00013	6.6	1.7792	1	0.189198	0.630181	6	3	X	9
PF3D7_1218300	| transcript=PF3D7_1218300.1 | gene=PF3D7_1218300 | organism=Plasmodium_falciparum_3D7 | gene_product=AP-2 complex subunit mu, putative | transcript_product=AP-2 complex subunit mu, putative | location=Pf3D7_12_v3:717955-719820(+) | protein_length=621 | sequence_SO=chromosome | SO=protein_coding | is_pseudo=false	5e-05	0.0001	0	0.0001	6.3	1.7758	1	0.189196	0.630183	2	5	X	4
PF3D7_1313800	| transcript=PF3D7_1313800.1 | gene=PF3D7_1313800 | organism=Plasmodium_falciparum_3D7 | gene_product=conserved Plasmodium membrane protein, unknown function | transcript_product=conserved Plasmodium membrane protein, unknown function | location=Pf3D7_13_v3:588800-599198(-) | protein_length=3411 | sequence_SO=chromosome | SO=protein_coding | is_pseudo=false	0	1e-05	0	0	6	1.7735	1	0.189194	0.630184	X	2	X	X
PF3D7_1222300	| transcript=PF3D7_1222300.1 | gene=PF3D7_1222300 | organism=Plasmodium_falciparum_3D7 | gene_product=endoplasmin, putative | transcript_product=endoplasmin, putative | location=Pf3D7_12_v3:883567-886032(-) | protein_length=821 | sequence_SO=chromosome | SO=protein_coding | is_pseudo=false	0.00024	0.00022	9e-05	0.00013	0.7	1.7727	1	0.189193	0.630184	12	15	4	7
PF3D7_0818200	| transcript=PF3D7_0818200.1 | gene=PF3D7_0818200 | organism=Plasmodium_falciparum_3D7 | gene_product=14-3-3 protein | transcript_product=14-3-3 protein | location=Pf3D7_08_v3:830006-831454(+) | protein_length=262 | sequence_SO=chromosome | SO=protein_coding | is_pseudo=false	0.00376	0.00672	0.00215	0.00232	0.8	1.7715	1	0.189191	0.630184	61	148	31	39
PF3D7_1230700	| transcript=PF3D7_1230700.1 | gene=PF3D7_1230700 | organism=Plasmodium_falciparum_3D7 | gene_product=protein transport protein SEC13 | transcript_product=protein transport protein SEC13 | location=Pf3D7_12_v3:1259620-1262088(+) | protein_length=822 | sequence_SO=chromosome | SO=protein_coding | is_pseudo=false	4e-05	0	0	0	6.4	1.7682	1	0.191342	0.629212	2	X	X	X
PF3D7_1027300	| transcript=PF3D7_1027300.1 | gene=PF3D7_1027300 | organism=Plasmodium_falciparum_3D7 | gene_product=peroxiredoxin | transcript_product=peroxiredoxin | location=Pf3D7_10_v3:1140589-1142602(-) | protein_length=393 | sequence_SO=chromosome | SO=protein_coding | is_pseudo=false	0	0.00036	0	0	7.9	1.7476	1	0.193492	0.628231	X	12	X	X
PF3D7_1238600	| transcript=PF3D7_1238600.1 | gene=PF3D7_1238600 | organism=Plasmodium_falciparum_3D7 | gene_product=sphingomyelin phosphodiesterase | transcript_product=sphingomyelin phosphodiesterase | location=Pf3D7_12_v3:1601515-1602696(-) | protein_length=393 | sequence_SO=chromosome | SO=protein_coding | is_pseudo=false	0	6e-05	0	0	7	1.7454	1	0.19349	0.628232	X	2	X	X
PF3D7_0422500	| transcript=PF3D7_0422500.1 | gene=PF3D7_0422500 | organism=Plasmodium_falciparum_3D7 | gene_product=pre-mRNA-splicing helicase BRR2, putative | transcript_product=pre-mRNA-splicing helicase BRR2, putative | location=Pf3D7_04_v3:1029329-1037953(+) | protein_length=2874 | sequence_SO=chromosome | SO=protein_coding | is_pseudo=false	0	1e-05	0	0	6.2	1.7366	1	0.195659	0.627224	X	3	X	X
PF3D7_0422700	| transcript=PF3D7_0422700.1 | gene=PF3D7_0422700 | organism=Plasmodium_falciparum_3D7 | gene_product=eukaryotic initiation factor 4A-III, putative | transcript_product=eukaryotic initiation factor 4A-III, putative | location=Pf3D7_04_v3:1040470-1041642(+) | protein_length=390 | sequence_SO=chromosome | SO=protein_coding | is_pseudo=false	0	0.00012	0	0	5.9	1.7227	1	0.197835	0.626199	X	4	X	X
PF3D7_0720400	| transcript=PF3D7_0720400.1 | gene=PF3D7_0720400 | organism=Plasmodium_falciparum_3D7 | gene_product=apoptosis-inducing factor, putative | transcript_product=apoptosis-inducing factor, putative | location=Pf3D7_07_v3:882936-884988(+) | protein_length=642 | sequence_SO=chromosome | SO=protein_coding | is_pseudo=false	0	4e-05	0	0	7.2	1.7093	1	0.200022	0.625154	X	2	X	X
PF3D7_0705500	| transcript=PF3D7_0705500.1 | gene=PF3D7_0705500 | organism=Plasmodium_falciparum_3D7 | gene_product=inositol-phosphate phosphatase, putative | transcript_product=inositol-phosphate phosphatase, putative | location=Pf3D7_07_v3:270022-278706(-) | protein_length=2814 | sequence_SO=chromosome | SO=protein_coding | is_pseudo=false	1e-05	0	0	0	7.1	1.6996	1	0.20222	0.624086	2	X	X	X
PF3D7_1210600	| transcript=PF3D7_1210600.1 | gene=PF3D7_1210600 | organism=Plasmodium_falciparum_3D7 | gene_product=conserved Plasmodium protein, unknown function | transcript_product=conserved Plasmodium protein, unknown function | location=Pf3D7_12_v3:472260-475457(-) | protein_length=1065 | sequence_SO=chromosome | SO=protein_coding | is_pseudo=false	0	2e-05	0	0	6.2	1.6857	1	0.204428	0.623002	X	2	X	X
PF3D7_1130400	| transcript=PF3D7_1130400.1 | gene=PF3D7_1130400 | organism=Plasmodium_falciparum_3D7 | gene_product=26S protease regulatory subunit 6A, putative | transcript_product=26S protease regulatory subunit 6A, putative | location=Pf3D7_11_v3:1168879-1170198(+) | protein_length=439 | sequence_SO=chromosome | SO=protein_coding | is_pseudo=false	0.00044	0.00014	0	0.00039	8.2	1.6644	1	0.20664	0.621902	12	5	X	11
PF3D7_0414000	| transcript=PF3D7_0414000.1 | gene=PF3D7_0414000 | organism=Plasmodium_falciparum_3D7 | gene_product=structural maintenance of chromosomes protein 3, putative | transcript_product=structural maintenance of chromosomes protein 3, putative | location=Pf3D7_04_v3:626891-633126(-) | protein_length=1193 | sequence_SO=chromosome | SO=protein_coding | is_pseudo=false	0	5e-05	0	0	6.7	1.6358	1	0.211104	0.619634	X	5	X	X
PF3D7_0801900	| transcript=PF3D7_0801900.1 | gene=PF3D7_0801900 | organism=Plasmodium_falciparum_3D7 | gene_product=lysine-specific histone demethylase, putative | transcript_product=lysine-specific histone demethylase, putative | location=Pf3D7_08_v3:128849-142837(+) | protein_length=4662 | sequence_SO=chromosome | SO=protein_coding | is_pseudo=false	0	1e-05	0	0	5.5	1.6341	1	0.211102	0.619634	X	3	X	X
PF3D7_0903900	| transcript=PF3D7_0903900.1 | gene=PF3D7_0903900 | organism=Plasmodium_falciparum_3D7 | gene_product=60S ribosomal protein L32 | transcript_product=60S ribosomal protein L32 | location=Pf3D7_09_v3:185821-186383(+) | protein_length=131 | sequence_SO=chromosome | SO=protein_coding | is_pseudo=false	0.00616	0.00064	0	0.00285	8.3	1.6329	1	0.213358	0.618463	50	7	X	24
PF3D7_0522800	| transcript=PF3D7_0522800.1 | gene=PF3D7_0522800 | organism=Plasmodium_falciparum_3D7 | gene_product=pre-mRNA-splicing factor BUD31, putative | transcript_product=pre-mRNA-splicing factor BUD31, putative | location=Pf3D7_05_v3:944184-944931(-) | protein_length=147 | sequence_SO=chromosome | SO=protein_coding | is_pseudo=false	0.00022	0	0	0	5.9	1.6197	1	0.213349	0.61847	2	X	X	X
PF3D7_1457700	| transcript=PF3D7_1457700.1 | gene=PF3D7_1457700 | organism=Plasmodium_falciparum_3D7 | gene_product=large ribosomal subunit nuclear export factor, putative | transcript_product=large ribosomal subunit nuclear export factor, putative | location=Pf3D7_14_v3:2367287-2371723(+) | protein_length=1478 | sequence_SO=chromosome | SO=protein_coding | is_pseudo=false	4e-05	3e-05	0	2e-05	6.2	1.603	1	0.217881	0.616077	4	4	X	2
PF3D7_1346400	| transcript=PF3D7_1346400.1 | gene=PF3D7_1346400 | organism=Plasmodium_falciparum_3D7 | gene_product=VPS13 domain-containing protein, putative | transcript_product=VPS13 domain-containing protein, putative | location=Pf3D7_13_v3:1852898-1870864(+) | protein_length=5988 | sequence_SO=chromosome | SO=protein_coding | is_pseudo=false	1e-05	1e-05	0	1e-05	6.2	1.6001	1	0.217879	0.61608	2	4	X	2
PF3D7_1205500	| transcript=PF3D7_1205500.1 | gene=PF3D7_1205500 | organism=Plasmodium_falciparum_3D7 | gene_product=zinc finger protein, putative | transcript_product=zinc finger protein, putative | location=Pf3D7_12_v3:242811-248168(+) | protein_length=1785 | sequence_SO=chromosome | SO=protein_coding | is_pseudo=false	6e-05	1e-05	0	2e-05	7.2	1.5994	1	0.217879	0.61608	7	2	X	2
PF3D7_0905400	| transcript=PF3D7_0905400.1 | gene=PF3D7_0905400 | organism=Plasmodium_falciparum_3D7 | gene_product=high molecular weight rhoptry protein 3 | transcript_product=high molecular weight rhoptry protein 3 | location=Pf3D7_09_v3:270740-274789(-) | protein_length=897 | sequence_SO=chromosome | SO=protein_coding | is_pseudo=false	0.00088	0.00049	0.00026	0.00038	0.7	1.5979	1	0.217878	0.616081	49	37	13	22
PF3D7_0527500	| transcript=PF3D7_0527500.1 | gene=PF3D7_0527500 | organism=Plasmodium_falciparum_3D7 | gene_product=Hsc70-interacting protein | transcript_product=Hsc70-interacting protein | location=Pf3D7_05_v3:1143618-1145359(+) | protein_length=458 | sequence_SO=chromosome | SO=protein_coding | is_pseudo=false	0.00025	5e-05	0	0.00014	7.3	1.5845	1	0.220154	0.614857	7	2	X	4
PF3D7_0512600	| transcript=PF3D7_0512600.1 | gene=PF3D7_0512600 | organism=Plasmodium_falciparum_3D7 | gene_product=ras-related protein Rab-1B | transcript_product=ras-related protein Rab-1B | location=Pf3D7_05_v3:544540-545993(+) | protein_length=200 | sequence_SO=chromosome | SO=protein_coding | is_pseudo=false	0	0.00107	0	0	7.2	1.5821	1	0.220151	0.614857	X	18	X	X
PF3D7_1004300	| transcript=PF3D7_1004300.1 | gene=PF3D7_1004300 | organism=Plasmodium_falciparum_3D7 | gene_product=E3 ubiquitin-protein ligase, putative | transcript_product=E3 ubiquitin-protein ligase, putative | location=Pf3D7_10_v3:199452-202844(-) | protein_length=1130 | sequence_SO=chromosome | SO=protein_coding | is_pseudo=false	0	2e-05	0	0	7.1	1.5817	1	0.220151	0.614858	X	2	X	X
PF3D7_1128000	0 genes:. 2 proteins in this group did not match any genes. PF3D7_1128000:| transcript=PF3D7_1128000.1 | gene=PF3D7_1128000 | organism=Plasmodium_falciparum_3D7 | gene_product=conserved Plasmodium protein, unknown function | transcript_product=conserved Plasmodium protein, unknown function | location=Pf3D7_11_v3:1087314-1093105(+) | protein_length=1789 | sequence_SO=chromosome | SO=protein_coding…	5e-05	2e-05	0	2e-05	5.8	1.5709	1	0.222438	0.613612	5	3	X	2
PF3D7_1303400	| transcript=PF3D7_1303400.1 | gene=PF3D7_1303400 | organism=Plasmodium_falciparum_3D7 | gene_product=LisH domain-containing protein, putative | transcript_product=LisH domain-containing protein, putative | location=Pf3D7_13_v3:165013-168081(-) | protein_length=1022 | sequence_SO=chromosome | SO=protein_coding | is_pseudo=false	9e-05	7e-05	0	5e-05	6.6	1.5546	1	0.224729	0.612349	6	6	X	3
PF3D7_1422700	| transcript=PF3D7_1422700.1 | gene=PF3D7_1422700 | organism=Plasmodium_falciparum_3D7 | gene_product=conserved Plasmodium protein, unknown function | transcript_product=conserved Plasmodium protein, unknown function | location=Pf3D7_14_v3:913819-917391(+) | protein_length=1190 | sequence_SO=chromosome | SO=protein_coding | is_pseudo=false	3e-05	0	0	0	6.5	1.5537	1	0.224728	0.612349	2	X	X	X
PF3D7_1023900	| transcript=PF3D7_1023900.1 | gene=PF3D7_1023900 | organism=Plasmodium_falciparum_3D7 | gene_product=chromodomain-helicase-DNA-binding protein 1 homolog, putative | transcript_product=chromodomain-helicase-DNA-binding protein 1 homolog, putative | location=Pf3D7_10_v3:997475-1007461(-) | protein_length=3328 | sequence_SO=chromosome | SO=protein_coding | is_pseudo=false	4e-05	6e-05	1e-05	4e-05	1	1.5466	1	0.227035	0.611062	9	18	2	8
PF3D7_0405000	| transcript=PF3D7_0405000.1 | gene=PF3D7_0405000 | organism=Plasmodium_falciparum_3D7 | gene_product=ATP-dependent RNA helicase DDX51, putative | transcript_product=ATP-dependent RNA helicase DDX51, putative | location=Pf3D7_04_v3:268960-271134(-) | protein_length=567 | sequence_SO=chromosome | SO=protein_coding | is_pseudo=false	0	4e-05	0	0	6.3	1.5323	1	0.229345	0.609758	X	2	X	X
PF3D7_1103100	| transcript=PF3D7_1103100.1 | gene=PF3D7_1103100 | organism=Plasmodium_falciparum_3D7 | gene_product=60S acidic ribosomal protein P1, putative | transcript_product=60S acidic ribosomal protein P1, putative | location=Pf3D7_11_v3:140048-140801(-) | protein_length=118 | sequence_SO=chromosome | SO=protein_coding | is_pseudo=false	0.00068	0.00071	0	0.0004	6.2	1.5295	1	0.229343	0.609759	5	7	X	3
PF3D7_0707400	| transcript=PF3D7_0707400.1 | gene=PF3D7_0707400 | organism=Plasmodium_falciparum_3D7 | gene_product=AAA family ATPase, putative | transcript_product=AAA family ATPase, putative | location=Pf3D7_07_v3:343912-345903(+) | protein_length=663 | sequence_SO=chromosome | SO=protein_coding | is_pseudo=false	0.00039	0.00045	0	0.00096	6.9	1.5127	1	0.231659	0.608436	16	25	X	41
PF3D7_1410600	| transcript=PF3D7_1410600.1 | gene=PF3D7_1410600 | organism=Plasmodium_falciparum_3D7 | gene_product=eukaryotic translation initiation factor 2 subunit gamma, putative | transcript_product=eukaryotic translation initiation factor 2 subunit gamma, putative | location=Pf3D7_14_v3:427191-428588(+) | protein_length=465 | sequence_SO=chromosome | SO=protein_coding | is_pseudo=false	0	5e-05	0	0	6.6	1.4931	1	0.236326	0.605722	X	2	X	X
PF3D7_1136300	| transcript=PF3D7_1136300.1 | gene=PF3D7_1136300 | organism=Plasmodium_falciparum_3D7 | gene_product=tudor staphylococcal nuclease | transcript_product=tudor staphylococcal nuclease | location=Pf3D7_11_v3:1422744-1426201(+) | protein_length=1098 | sequence_SO=chromosome | SO=protein_coding | is_pseudo=false	7e-05	0	0	0	6.2	1.493	1	0.236326	0.605722	5	X	X	X
PF3D7_0710200	| transcript=PF3D7_0710200.1 | gene=PF3D7_0710200 | organism=Plasmodium_falciparum_3D7 | gene_product=conserved Plasmodium protein, unknown function | transcript_product=conserved Plasmodium protein, unknown function | location=Pf3D7_07_v3:463105-471837(+) | protein_length=2910 | sequence_SO=chromosome | SO=protein_coding | is_pseudo=false	0	1e-05	0	0	5.4	1.4905	1	0.236325	0.605724	X	3	X	X
PF3D7_1223400	| transcript=PF3D7_1223400.1 | gene=PF3D7_1223400 | organism=Plasmodium_falciparum_3D7 | gene_product=phospholipid-transporting ATPase, putative | transcript_product=phospholipid-transporting ATPase, putative | location=Pf3D7_12_v3:941125-946745(+) | protein_length=1618 | sequence_SO=chromosome | SO=protein_coding | is_pseudo=false	5e-05	8e-05	0	0.00016	5.8	1.4878	1	0.236323	0.605725	5	11	X	17
PF3D7_0727200	| transcript=PF3D7_0727200.1 | gene=PF3D7_0727200 | organism=Plasmodium_falciparum_3D7 | gene_product=cysteine desulfurase, putative | transcript_product=cysteine desulfurase, putative | location=Pf3D7_07_v3:1156748-1158409(-) | protein_length=553 | sequence_SO=chromosome | SO=protein_coding | is_pseudo=false	0	0.00017	0	0	6.4	1.4847	1	0.23632	0.605726	X	8	X	X
PF3D7_0317700	| transcript=PF3D7_0317700.1 | gene=PF3D7_0317700 | organism=Plasmodium_falciparum_3D7 | gene_product=CPSF (cleavage and polyadenylation specific factor), subunit A, putative | transcript_product=CPSF (cleavage and polyadenylation specific factor), subunit A, putative | location=Pf3D7_03_v3:728259-738076(+) | protein_length=2870 | sequence_SO=chromosome | SO=protein_coding | is_pseudo=false	2e-05	0	0	0	5.5	1.4797	1	0.238668	0.604337	4	X	X	X
PF3D7_0716300	| transcript=PF3D7_0716300.1 | gene=PF3D7_0716300 | organism=Plasmodium_falciparum_3D7 | gene_product=conserved protein, unknown function | transcript_product=conserved protein, unknown function | location=Pf3D7_07_v3:717281-718968(+) | protein_length=522 | sequence_SO=chromosome | SO=protein_coding | is_pseudo=false	0.00025	0.00014	0	0.00015	7.2	1.477	1	0.238667	0.604339	8	6	X	5
PF3D7_0918000	| transcript=PF3D7_0918000.1 | gene=PF3D7_0918000 | organism=Plasmodium_falciparum_3D7 | gene_product=glideosome-associated protein 50 | transcript_product=glideosome-associated protein 50 | location=Pf3D7_09_v3:742494-743684(-) | protein_length=396 | sequence_SO=chromosome | SO=protein_coding | is_pseudo=false	0.00347	0.00352	0.00046	0.00259	1.2	1.4709	1	0.238662	0.604341	85	117	10	66
PF3D7_0922500	| transcript=PF3D7_0922500.1 | gene=PF3D7_0922500 | organism=Plasmodium_falciparum_3D7 | gene_product=phosphoglycerate kinase | transcript_product=phosphoglycerate kinase | location=Pf3D7_09_v3:913230-914480(+) | protein_length=416 | sequence_SO=chromosome | SO=protein_coding | is_pseudo=false	0.00019	0.00037	9e-05	0.00019	0.7	1.4393	1	0.245739	0.600061	5	13	2	5
PF3D7_1338300	| transcript=PF3D7_1338300.1 | gene=PF3D7_1338300 | organism=Plasmodium_falciparum_3D7 | gene_product=elongation factor 1-gamma, putative | transcript_product=elongation factor 1-gamma, putative | location=Pf3D7_13_v3:1548692-1550396(+) | protein_length=411 | sequence_SO=chromosome | SO=protein_coding | is_pseudo=false	0.00024	0.00055	0.00018	0.00019	0.7	1.43	1	0.245733	0.600065	6	19	4	5
PF3D7_0610400	| transcript=PF3D7_0610400.1 | gene=PF3D7_0610400 | organism=Plasmodium_falciparum_3D7 | gene_product=histone H3 | transcript_product=histone H3 | location=Pf3D7_06_v3:444747-445157(+) | protein_length=136 | sequence_SO=chromosome | SO=protein_coding | is_pseudo=false	0.03221	0.05042	0.00674	0.03239	1	1.4145	1	0.250488	0.597108	271.3	576.2	50.5	283.1
PF3D7_1437000	| transcript=PF3D7_1437000.1 | gene=PF3D7_1437000 | organism=Plasmodium_falciparum_3D7 | gene_product=N-acetyltransferase, GNAT family, putative | transcript_product=N-acetyltransferase, GNAT family, putative | location=Pf3D7_14_v3:1502648-1504861(+) | protein_length=544 | sequence_SO=chromosome | SO=protein_coding | is_pseudo=false	0	4e-05	0	0	5.9	1.4099	1	0.250487	0.597112	X	2	X	X
PF3D7_0309300	| transcript=PF3D7_0309300.1 | gene=PF3D7_0309300 | organism=Plasmodium_falciparum_3D7 | gene_product=N2227-like protein, putative | transcript_product=N2227-like protein, putative | location=Pf3D7_03_v3:397649-400516(+) | protein_length=955 | sequence_SO=chromosome | SO=protein_coding | is_pseudo=false	5e-05	0	0	0	5.6	1.4036	1	0.250483	0.597114	3	X	X	X
PF3D7_0915400	| transcript=PF3D7_0915400.1 | gene=PF3D7_0915400 | organism=Plasmodium_falciparum_3D7 | gene_product=ATP-dependent 6-phosphofructokinase | transcript_product=ATP-dependent 6-phosphofructokinase | location=Pf3D7_09_v3:650585-654841(-) | protein_length=1418 | sequence_SO=chromosome | SO=protein_coding | is_pseudo=false	0.00011	5e-05	4e-05	3e-05	0.8	1.387	1	0.255263	0.594077	10	6	3	3
PF3D7_1025000	| transcript=PF3D7_1025000.1 | gene=PF3D7_1025000 | organism=Plasmodium_falciparum_3D7 | gene_product=EF-hand calcium-binding domain-containing protein, putative | transcript_product=EF-hand calcium-binding domain-containing protein, putative | location=Pf3D7_10_v3:1045608-1049760(-) | protein_length=980 | sequence_SO=chromosome | SO=protein_coding | is_pseudo=false	0	9e-05	0	0	5.1	1.381	1	0.255261	0.594082	X	7	X	X
PF3D7_1405800	| transcript=PF3D7_1405800.1 | gene=PF3D7_1405800 | organism=Plasmodium_falciparum_3D7 | gene_product=ribosome biogenesis protein BOP1, putative | transcript_product=ribosome biogenesis protein BOP1, putative | location=Pf3D7_14_v3:200493-204143(-) | protein_length=966 | sequence_SO=chromosome | SO=protein_coding | is_pseudo=false	0	4e-05	0	0	5.9	1.3808	1	0.255261	0.594082	X	3	X	X
PF3D7_0704100	| transcript=PF3D7_0704100.1 | gene=PF3D7_0704100 | organism=Plasmodium_falciparum_3D7 | gene_product=conserved Plasmodium membrane protein, unknown function | transcript_product=conserved Plasmodium membrane protein, unknown function | location=Pf3D7_07_v3:180036-190715(+) | protein_length=3559 | sequence_SO=chromosome | SO=protein_coding | is_pseudo=false	2e-05	0	0	0	5.6	1.3663	1	0.257657	0.592537	4	X	X	X
PF3D7_0929400	| transcript=PF3D7_0929400.1 | gene=PF3D7_0929400 | organism=Plasmodium_falciparum_3D7 | gene_product=high molecular weight rhoptry protein 2 | transcript_product=high molecular weight rhoptry protein 2 | location=Pf3D7_09_v3:1175203-1180762(+) | protein_length=1378 | sequence_SO=chromosome | SO=protein_coding | is_pseudo=false	0.0011	0.0007	0.00017	0.00068	0.9	1.3313	1	0.264882	0.587777	94	81	13	60
PF3D7_1123900	| transcript=PF3D7_1123900.1 | gene=PF3D7_1123900 | organism=Plasmodium_falciparum_3D7 | gene_product=13 kDa ribonucleoprotein-associated protein, putative | transcript_product=13 kDa ribonucleoprotein-associated protein, putative | location=Pf3D7_11_v3:945470-946148(+) | protein_length=145 | sequence_SO=chromosome | SO=protein_coding | is_pseudo=false	0.00033	0.00025	0.00025	0	6.7	1.3197	1	0.264876	0.587783	3	3	2	X
PF3D7_0614500	| transcript=PF3D7_0614500.1 | gene=PF3D7_0614500 | organism=Plasmodium_falciparum_3D7 | gene_product=60S ribosomal protein L19 | transcript_product=60S ribosomal protein L19 | location=Pf3D7_06_v3:606142-607259(-) | protein_length=182 | sequence_SO=chromosome | SO=protein_coding | is_pseudo=false	0.00053	0.00052	0.0002	0.00043	0.6	1.3142	1	0.2673	0.586155	6	8	2	5
PF3D7_0516900	| transcript=PF3D7_0516900.1 | gene=PF3D7_0516900 | organism=Plasmodium_falciparum_3D7 | gene_product=60S ribosomal protein L2 | transcript_product=60S ribosomal protein L2 | location=Pf3D7_05_v3:712762-713772(-) | protein_length=260 | sequence_SO=chromosome | SO=protein_coding | is_pseudo=false	0.00031	0.00037	0.00028	0.00018	0.4	1.3063	1	0.267295	0.586158	5	8	4	3
PF3D7_1351700	| transcript=PF3D7_1351700.1 | gene=PF3D7_1351700 | organism=Plasmodium_falciparum_3D7 | gene_product=inner membrane complex protein 1f, putative | transcript_product=inner membrane complex protein 1f, putative | location=Pf3D7_13_v3:2059616-2063924(+) | protein_length=1318 | sequence_SO=chromosome | SO=protein_coding | is_pseudo=false	0.0001	0	0	0	5.6	1.2865	1	0.272151	0.582846	8	X	X	X
PF3D7_1309400	| transcript=PF3D7_1309400.1 | gene=PF3D7_1309400 | organism=Plasmodium_falciparum_3D7 | gene_product=HORMA domain protein, putative | transcript_product=HORMA domain protein, putative | location=Pf3D7_13_v3:431892-435875(+) | protein_length=1327 | sequence_SO=chromosome | SO=protein_coding | is_pseudo=false	0	2e-05	0	0	5.6	1.283	1	0.272149	0.582848	X	2	X	X
PF3D7_0617900	| transcript=PF3D7_0617900.1 | gene=PF3D7_0617900 | organism=Plasmodium_falciparum_3D7 | gene_product=histone H3 variant | transcript_product=histone H3 variant | location=Pf3D7_06_v3:754395-754805(+) | protein_length=136 | sequence_SO=chromosome | SO=protein_coding | is_pseudo=false	0.01563	0.01589	0.0058	0.01303	0.6	1.2799	1	0.272147	0.582849	131.6	181.6	43.4	113.9
PF3D7_1449500	| transcript=PF3D7_1449500.1 | gene=PF3D7_1449500 | organism=Plasmodium_falciparum_3D7 | gene_product=AP2 domain transcription factor AP2-O5, putative | transcript_product=AP2 domain transcription factor AP2-O5, putative | location=Pf3D7_14_v3:2031087-2033397(+) | protein_length=715 | sequence_SO=chromosome | SO=protein_coding | is_pseudo=false	0.00102	0.00075	0.00036	0.0007	0.6	1.2672	1	0.27458	0.581165	45	45	14	32
PF3D7_0823800	| transcript=PF3D7_0823800.1 | gene=PF3D7_0823800 | organism=Plasmodium_falciparum_3D7 | gene_product=DnaJ protein, putative | transcript_product=DnaJ protein, putative | location=Pf3D7_08_v3:1043813-1045780(+) | protein_length=655 | sequence_SO=chromosome | SO=protein_coding | is_pseudo=false	0.0021	0.00094	0.00072	0.00074	0.7	1.2609	1	0.277021	0.579458	85	52	26	31
PF3D7_1010300	| transcript=PF3D7_1010300.1 | gene=PF3D7_1010300 | organism=Plasmodium_falciparum_3D7 | gene_product=succinate dehydrogenase subunit 4, putative | transcript_product=succinate dehydrogenase subunit 4, putative | location=Pf3D7_10_v3:414732-415328(+) | protein_length=118 | sequence_SO=chromosome | SO=protein_coding | is_pseudo=false	0	0.0002	0	0	6.5	1.2342	1	0.281906	0.575992	X	2	X	X
PF3D7_1451100	| transcript=PF3D7_1451100.1 | gene=PF3D7_1451100 | organism=Plasmodium_falciparum_3D7 | gene_product=elongation factor 2 | transcript_product=elongation factor 2 | location=Pf3D7_14_v3:2090902-2093400(+) | protein_length=832 | sequence_SO=chromosome | SO=protein_coding | is_pseudo=false	0.00054	0.00087	0.00026	0.00052	0.6	1.2034	1	0.286804	0.572451	28	60.9	12	28
PF3D7_1410400	| transcript=PF3D7_1410400.1 | gene=PF3D7_1410400 | organism=Plasmodium_falciparum_3D7 | gene_product=rhoptry-associated protein 1 | transcript_product=rhoptry-associated protein 1 | location=Pf3D7_14_v3:420442-422790(+) | protein_length=782 | sequence_SO=chromosome | SO=protein_coding | is_pseudo=false	0.00068	0.00067	0.0003	0.00056	0.5	1.1999	1	0.286802	0.572452	33	44	13	28
PF3D7_0318200	| transcript=PF3D7_0318200.1 | gene=PF3D7_0318200 | organism=Plasmodium_falciparum_3D7 | gene_product=DNA-directed RNA polymerase II subunit RPB1 | transcript_product=DNA-directed RNA polymerase II subunit RPB1 | location=Pf3D7_03_v3:748465-755838(+) | protein_length=2457 | sequence_SO=chromosome | SO=protein_coding | is_pseudo=false	5e-05	0.0001	1e-05	6e-05	0.9	1.1943	1	0.28926	0.570648	8	20	2	10
PF3D7_1108700	| transcript=PF3D7_1108700.1 | gene=PF3D7_1108700 | organism=Plasmodium_falciparum_3D7 | gene_product=heat shock protein J2 | transcript_product=heat shock protein J2 | location=Pf3D7_11_v3:373238-374860(-) | protein_length=540 | sequence_SO=chromosome | SO=protein_coding | is_pseudo=false	0.00051	0.00018	0.00013	0.00017	0.6	1.1597	1	0.294174	0.566994	17	8	4	6
PF3D7_1462300	| transcript=PF3D7_1462300.1 | gene=PF3D7_1462300 | organism=Plasmodium_falciparum_3D7 | gene_product=GTP-binding protein, putative | transcript_product=GTP-binding protein, putative | location=Pf3D7_14_v3:2524921-2528994(-) | protein_length=1357 | sequence_SO=chromosome | SO=protein_coding | is_pseudo=false	0.00014	0.00014	3e-05	0.00014	0.8	1.1471	1	0.296637	0.565137	12	16	2	12
PF3D7_0814200	| transcript=PF3D7_0814200.1 | gene=PF3D7_0814200 | organism=Plasmodium_falciparum_3D7 | gene_product=DNA/RNA-binding protein Alba 1 | transcript_product=DNA/RNA-binding protein Alba 1 | location=Pf3D7_08_v3:687340-688086(+) | protein_length=248 | sequence_SO=chromosome | SO=protein_coding | is_pseudo=false	0.00287	0.00187	0.00117	0.00163	0.5	1.1424	1	0.296634	0.565138	44	39	16	26
PF3D7_0423500	| transcript=PF3D7_0423500.1 | gene=PF3D7_0423500 | organism=Plasmodium_falciparum_3D7 | gene_product=glideosome associated protein with multiple membrane spans 2 | transcript_product=glideosome associated protein with multiple membrane spans 2 | location=Pf3D7_04_v3:1058997-1060551(+) | protein_length=372 | sequence_SO=chromosome | SO=protein_coding | is_pseudo=false	0.00178	0.00141	0.00024	0.00163	0.9	1.1236	1	0.301569	0.561364	41	44	5	39
PF3D7_1246200	| transcript=PF3D7_1246200.1 | gene=PF3D7_1246200 | organism=Plasmodium_falciparum_3D7 | gene_product=actin I | transcript_product=actin I | location=Pf3D7_12_v3:1920784-1921914(+) | protein_length=376 | sequence_SO=chromosome | SO=protein_coding | is_pseudo=false	0.00071	0.00832	0.00076	0.00086	1.1	1.1227	1	0.301569	0.561364	16.5	262.8	15.7	20.8
PF3D7_1338200	| transcript=PF3D7_1338200.1 | gene=PF3D7_1338200 | organism=Plasmodium_falciparum_3D7 | gene_product=60S ribosomal protein L6, putative | transcript_product=60S ribosomal protein L6, putative | location=Pf3D7_13_v3:1545070-1545735(-) | protein_length=221 | sequence_SO=chromosome | SO=protein_coding | is_pseudo=false	0.00088	0.00032	0.00025	0.00035	0.6	1.1014	1	0.304032	0.559453	12	6	3	5
PF3D7_0806800	| transcript=PF3D7_0806800.1 | gene=PF3D7_0806800 | organism=Plasmodium_falciparum_3D7 | gene_product=V-type proton ATPase subunit a, putative | transcript_product=V-type proton ATPase subunit a, putative | location=Pf3D7_08_v3:363260-366421(-) | protein_length=1053 | sequence_SO=chromosome | SO=protein_coding | is_pseudo=false	0.00209	0.00281	0.00067	0.00217	0.6	1.0939	1	0.306505	0.55752	136	249	39	147
PF3D7_1118200	| transcript=PF3D7_1118200.1 | gene=PF3D7_1118200 | organism=Plasmodium_falciparum_3D7 | gene_product=heat shock protein 90, putative | transcript_product=heat shock protein 90, putative | location=Pf3D7_11_v3:688766-691558(-) | protein_length=930 | sequence_SO=chromosome | SO=protein_coding | is_pseudo=false	0.00023	0.0004	0.00016	0.00023	0.4	1.0665	1	0.311446	0.553601	13	31	8	14
PF3D7_0617800	| transcript=PF3D7_0617800.1 | gene=PF3D7_0617800 | organism=Plasmodium_falciparum_3D7 | gene_product=histone H2A | transcript_product=histone H2A | location=Pf3D7_06_v3:748416-748814(-) | protein_length=132 | sequence_SO=chromosome | SO=protein_coding | is_pseudo=false	0.01553	0.00998	0.00536	0.01089	0.5	1.0577	1	0.313919	0.551611	127	110.7	39	92.4
PF3D7_1341300	| transcript=PF3D7_1341300.1 | gene=PF3D7_1341300 | organism=Plasmodium_falciparum_3D7 | gene_product=60S ribosomal protein L18-2, putative | transcript_product=60S ribosomal protein L18-2, putative | location=Pf3D7_13_v3:1636556-1637833(+) | protein_length=187 | sequence_SO=chromosome | SO=protein_coding | is_pseudo=false	0.00207	0.0014	0.00116	0.00116	0.4	1.0508	1	0.313917	0.551615	24	22	12	14
PF3D7_0826100	| transcript=PF3D7_0826100.1 | gene=PF3D7_0826100 | organism=Plasmodium_falciparum_3D7 | gene_product=HECT-like E3 ubiquitin ligase, putative | transcript_product=HECT-like E3 ubiquitin ligase, putative | location=Pf3D7_08_v3:1113369-1139144(-) | protein_length=8591 | sequence_SO=chromosome | SO=protein_coding | is_pseudo=false	1e-05	1e-05	0	1e-05	4.4	1.0467	1	0.313915	0.551616	5	5	X	6
PF3D7_0516200	| transcript=PF3D7_0516200.1 | gene=PF3D7_0516200 | organism=Plasmodium_falciparum_3D7 | gene_product=40S ribosomal protein S11 | transcript_product=40S ribosomal protein S11 | location=Pf3D7_05_v3:675809-676614(-) | protein_length=151 | sequence_SO=chromosome | SO=protein_coding | is_pseudo=false	0.00385	0.0037	0.00192	0.0034	0.4	1.0406	1	0.316391	0.549609	36	47	16	33
PF3D7_1246800	| transcript=PF3D7_1246800.1 | gene=PF3D7_1246800 | organism=Plasmodium_falciparum_3D7 | gene_product=signal recognition particle receptor subunit beta, putative | transcript_product=signal recognition particle receptor subunit beta, putative | location=Pf3D7_12_v3:1941365-1942491(+) | protein_length=261 | sequence_SO=chromosome | SO=protein_coding | is_pseudo=false	0.00291	0.00169	0.00014	0.00286	1.2	1.0226	1	0.318862	0.547588	47	37	2	48
PF3D7_1407100	| transcript=PF3D7_1407100.1 | gene=PF3D7_1407100 | organism=Plasmodium_falciparum_3D7 | gene_product=rRNA 2'-O-methyltransferase fibrillarin, putative | transcript_product=rRNA 2'-O-methyltransferase fibrillarin, putative | location=Pf3D7_14_v3:258746-259988(+) | protein_length=318 | sequence_SO=chromosome | SO=protein_coding | is_pseudo=false	0.00112	0.00071	0.00029	0.00083	0.6	1.0223	1	0.318861	0.547588	22	19	5	17
PF3D7_1004200	| transcript=PF3D7_1004200.1 | gene=PF3D7_1004200 | organism=Plasmodium_falciparum_3D7 | gene_product=WD repeat-containing protein, putative | transcript_product=WD repeat-containing protein, putative | location=Pf3D7_10_v3:187669-196954(-) | protein_length=3013 | sequence_SO=chromosome | SO=protein_coding | is_pseudo=false	1e-05	0	0	0	4.5	1.0092	1	0.321334	0.545547	2	X	X	X
PF3D7_1426000	| transcript=PF3D7_1426000.1 | gene=PF3D7_1426000 | organism=Plasmodium_falciparum_3D7 | gene_product=60S ribosomal protein L21 | transcript_product=60S ribosomal protein L21 | location=Pf3D7_14_v3:1016133-1016618(-) | protein_length=161 | sequence_SO=chromosome | SO=protein_coding | is_pseudo=false	0.00251	0.00163	0.00045	0.00184	0.8	0.9964	1	0.323806	0.543489	25	22	4	19
PF3D7_0316800	| transcript=PF3D7_0316800.1 | gene=PF3D7_0316800 | organism=Plasmodium_falciparum_3D7 | gene_product=40S ribosomal protein S15A, putative | transcript_product=40S ribosomal protein S15A, putative | location=Pf3D7_03_v3:677842-678474(+) | protein_length=130 | sequence_SO=chromosome | SO=protein_coding | is_pseudo=false	0.00261	0.00339	0.00084	0.00287	0.7	0.9923	1	0.323804	0.543489	21	37	6	24
PF3D7_1352500	| transcript=PF3D7_1352500.1 | gene=PF3D7_1352500 | organism=Plasmodium_falciparum_3D7 | gene_product=thioredoxin-related protein, putative | transcript_product=thioredoxin-related protein, putative | location=Pf3D7_13_v3:2093365-2094337(-) | protein_length=208 | sequence_SO=chromosome | SO=protein_coding | is_pseudo=false	0.00116	0.00195	0.00017	0.00217	0.9	0.985	1	0.326278	0.541412	15	34	2	29
PF3D7_1134000	| transcript=PF3D7_1134000.1 | gene=PF3D7_1134000 | organism=Plasmodium_falciparum_3D7 | gene_product=heat shock protein 70 | transcript_product=heat shock protein 70 | location=Pf3D7_11_v3:1320114-1322105(+) | protein_length=663 | sequence_SO=chromosome | SO=protein_coding | is_pseudo=false	0.00392	0.00294	0.00164	0.00307	0.4	0.9819	1	0.326277	0.541413	161	164	60	131
PF3D7_1351400	| transcript=PF3D7_1351400.1 | gene=PF3D7_1351400 | organism=Plasmodium_falciparum_3D7 | gene_product=60S ribosomal protein L17, putative | transcript_product=60S ribosomal protein L17, putative | location=Pf3D7_13_v3:2052108-2053384(+) | protein_length=203 | sequence_SO=chromosome | SO=protein_coding | is_pseudo=false	0.00143	0.00041	0.00045	0.00038	0.6	0.9698	1	0.328748	0.53932	18	7	5	5
PF3D7_1320000	| transcript=PF3D7_1320000.1 | gene=PF3D7_1320000 | organism=Plasmodium_falciparum_3D7 | gene_product=golgi protein 1 | transcript_product=golgi protein 1 | location=Pf3D7_13_v3:829534-833310(+) | protein_length=1258 | sequence_SO=chromosome | SO=protein_coding | is_pseudo=false	3e-05	0	0	0	4.5	0.9665	1	0.328747	0.539321	2	X	X	X
PF3D7_1118500	| transcript=PF3D7_1118500.1 | gene=PF3D7_1118500 | organism=Plasmodium_falciparum_3D7 | gene_product=nucleolar protein 56, putative | transcript_product=nucleolar protein 56, putative | location=Pf3D7_11_v3:703175-704959(+) | protein_length=594 | sequence_SO=chromosome | SO=protein_coding | is_pseudo=false	5e-05	0.00018	6e-05	5e-05	0.6	0.9639	1	0.328746	0.539321	2	9	2	2
PF3D7_1331800	| transcript=PF3D7_1331800.1 | gene=PF3D7_1331800 | organism=Plasmodium_falciparum_3D7 | gene_product=60S ribosomal protein L23, putative | transcript_product=60S ribosomal protein L23, putative | location=Pf3D7_13_v3:1324012-1324802(+) | protein_length=139 | sequence_SO=chromosome | SO=protein_coding | is_pseudo=false	0.00116	0.0006	0.00052	0.00056	0.4	0.9628	1	0.331219	0.537207	10	7	4	5
PF3D7_1424100	| transcript=PF3D7_1424100.1 | gene=PF3D7_1424100 | organism=Plasmodium_falciparum_3D7 | gene_product=60S ribosomal protein L5, putative | transcript_product=60S ribosomal protein L5, putative | location=Pf3D7_14_v3:973853-975543(-) | protein_length=294 | sequence_SO=chromosome | SO=protein_coding | is_pseudo=false	0.00066	0.00036	0.00037	0.00026	0.5	0.9601	1	0.331219	0.537208	12	9	6	5
PF3D7_0917900	| transcript=PF3D7_0917900.1 | gene=PF3D7_0917900 | organism=Plasmodium_falciparum_3D7 | gene_product=heat shock protein 70 | transcript_product=heat shock protein 70 | location=Pf3D7_09_v3:737985-740276(+) | protein_length=652 | sequence_SO=chromosome | SO=protein_coding | is_pseudo=false	0.00206	0.00265	0.00097	0.00234	0.4	0.9234	1	0.33615	0.53294	83	145	35	98
PF3D7_1317800	| transcript=PF3D7_1317800.1 | gene=PF3D7_1317800 | organism=Plasmodium_falciparum_3D7 | gene_product=40S ribosomal protein S19 | transcript_product=40S ribosomal protein S19 | location=Pf3D7_13_v3:740527-741454(+) | protein_length=145 | sequence_SO=chromosome | SO=protein_coding | is_pseudo=false	0.00178	0.00082	0.00063	0.00097	0.5	0.9197	1	0.338617	0.530776	16	10	5	9
PF3D7_1323100	| transcript=PF3D7_1323100.1 | gene=PF3D7_1323100 | organism=Plasmodium_falciparum_3D7 | gene_product=60S ribosomal protein L6, putative | transcript_product=60S ribosomal protein L6, putative | location=Pf3D7_13_v3:965486-966280(-) | protein_length=190 | sequence_SO=chromosome | SO=protein_coding | is_pseudo=false	0.00102	0.001	0.00048	0.00098	0.4	0.917	1	0.338617	0.530777	12	16	5	12
PF3D7_1137300	| transcript=PF3D7_1137300.1 | gene=PF3D7_1137300 | organism=Plasmodium_falciparum_3D7 | gene_product=CLPTM1 domain-containing protein, putative | transcript_product=CLPTM1 domain-containing protein, putative | location=Pf3D7_11_v3:1466197-1468266(-) | protein_length=689 | sequence_SO=chromosome | SO=protein_coding | is_pseudo=false	0.00014	0.0001	5e-05	0.00014	0.4	0.9136	1	0.338616	0.530778	6	6	2	6
PF3D7_0524000	| transcript=PF3D7_0524000.1 | gene=PF3D7_0524000 | organism=Plasmodium_falciparum_3D7 | gene_product=karyopherin beta | transcript_product=karyopherin beta | location=Pf3D7_05_v3:998753-1002124(+) | protein_length=1123 | sequence_SO=chromosome | SO=protein_coding | is_pseudo=false	0.0003	0.00017	3e-05	0.0003	0.8	0.9108	1	0.338615	0.530779	21	16	2	22
PF3D7_1008700	| transcript=PF3D7_1008700.1 | gene=PF3D7_1008700 | organism=Plasmodium_falciparum_3D7 | gene_product=tubulin beta chain | transcript_product=tubulin beta chain | location=Pf3D7_10_v3:360625-362480(-) | protein_length=445 | sequence_SO=chromosome | SO=protein_coding | is_pseudo=false	0.00033	0.00069	0.00041	0.00021	0.5	0.8821	1	0.343537	0.526408	9	25.8	10	6
PF3D7_1218500	| transcript=PF3D7_1218500.1 | gene=PF3D7_1218500 | organism=Plasmodium_falciparum_3D7 | gene_product=dynamin-like protein, putative | transcript_product=dynamin-like protein, putative | location=Pf3D7_12_v3:725841-729837(-) | protein_length=1061 | sequence_SO=chromosome | SO=protein_coding | is_pseudo=false	5e-05	4e-05	3e-05	3e-05	0.4	0.8816	1	0.343537	0.526408	3	4	2	2
PF3D7_0919000	| transcript=PF3D7_0919000.1 | gene=PF3D7_0919000 | organism=Plasmodium_falciparum_3D7 | gene_product=nucleosome assembly protein | transcript_product=nucleosome assembly protein | location=Pf3D7_09_v3:781368-782675(-) | protein_length=269 | sequence_SO=chromosome | SO=protein_coding | is_pseudo=false	0.00234	0.0023	0.00088	0.00249	0.5	0.8663	1	0.348452	0.521969	39	52	13	43
PF3D7_1465900	| transcript=PF3D7_1465900.1 | gene=PF3D7_1465900 | organism=Plasmodium_falciparum_3D7 | gene_product=40S ribosomal protein S3 | transcript_product=40S ribosomal protein S3 | location=Pf3D7_14_v3:2684141-2685534(+) | protein_length=221 | sequence_SO=chromosome | SO=protein_coding | is_pseudo=false	0.00139	0.00291	0.00074	0.0019	0.5	0.8526	1	0.350904	0.519727	19	54	9	27
PF3D7_1019400	| transcript=PF3D7_1019400.1 | gene=PF3D7_1019400 | organism=Plasmodium_falciparum_3D7 | gene_product=60S ribosomal protein L30e, putative | transcript_product=60S ribosomal protein L30e, putative | location=Pf3D7_10_v3:786503-787008(+) | protein_length=108 | sequence_SO=chromosome | SO=protein_coding | is_pseudo=false	0.0006	0.00044	0.00034	0.00043	0.3	0.8131	1	0.355794	0.515199	4	4	2	3
PF3D7_1451800	| transcript=PF3D7_1451800.1 | gene=PF3D7_1451800 | organism=Plasmodium_falciparum_3D7 | gene_product=sortilin | transcript_product=sortilin | location=Pf3D7_14_v3:2123461-2126599(+) | protein_length=895 | sequence_SO=chromosome | SO=protein_coding | is_pseudo=false	0.00027	0.00011	4e-05	0.00021	0.6	0.8092	1	0.358237	0.512909	15	8	2	12
PF3D7_1006200	| transcript=PF3D7_1006200.1 | gene=PF3D7_1006200 | organism=Plasmodium_falciparum_3D7 | gene_product=DNA/RNA-binding protein Alba 3 | transcript_product=DNA/RNA-binding protein Alba 3 | location=Pf3D7_10_v3:262150-262997(-) | protein_length=107 | sequence_SO=chromosome | SO=protein_coding | is_pseudo=false	0.00755	0.00612	0.00441	0.00625	0.3	0.8076	1	0.358237	0.512909	50	55	26	43
PF3D7_1105400	| transcript=PF3D7_1105400.1 | gene=PF3D7_1105400 | organism=Plasmodium_falciparum_3D7 | gene_product=40S ribosomal protein S4, putative | transcript_product=40S ribosomal protein S4, putative | location=Pf3D7_11_v3:235597-237097(-) | protein_length=261 | sequence_SO=chromosome | SO=protein_coding | is_pseudo=false	0.00204	0.00333	0.00111	0.00268	0.4	0.8017	1	0.358235	0.51291	33	73	16	45
PF3D7_0626800	| transcript=PF3D7_0626800.1 | gene=PF3D7_0626800 | organism=Plasmodium_falciparum_3D7 | gene_product=pyruvate kinase | transcript_product=pyruvate kinase | location=Pf3D7_06_v3:1078995-1081320(+) | protein_length=511 | sequence_SO=chromosome | SO=protein_coding | is_pseudo=false	0.00047	0.00042	0.00028	0.00043	0.3	0.785	1	0.363106	0.508286	15	18	8	14
PF3D7_0618300	| transcript=PF3D7_0618300.1 | gene=PF3D7_0618300 | organism=Plasmodium_falciparum_3D7 | gene_product=60S ribosomal protein L27a, putative | transcript_product=60S ribosomal protein L27a, putative | location=Pf3D7_06_v3:768792-769456(+) | protein_length=148 | sequence_SO=chromosome | SO=protein_coding | is_pseudo=false	0.00371	0.00185	0.00147	0.00221	0.4	0.7686	1	0.365534	0.505953	34	23	12	21
PF3D7_1439800	| transcript=PF3D7_1439800.1 | gene=PF3D7_1439800 | organism=Plasmodium_falciparum_3D7 | gene_product=vesicle-associated membrane protein, putative | transcript_product=vesicle-associated membrane protein, putative | location=Pf3D7_14_v3:1618819-1619794(+) | protein_length=241 | sequence_SO=chromosome | SO=protein_coding | is_pseudo=false	0.00121	0.00059	0.00015	0.0011	0.8	0.7467	1	0.367955	0.503607	18	12	2	17
PF3D7_0821000	| transcript=PF3D7_0821000.1 | gene=PF3D7_0821000 | organism=Plasmodium_falciparum_3D7 | gene_product=conserved Plasmodium protein, unknown function | transcript_product=conserved Plasmodium protein, unknown function | location=Pf3D7_08_v3:948745-950899(+) | protein_length=514 | sequence_SO=chromosome | SO=protein_coding | is_pseudo=false	0.00028	0.00074	0.00021	0.00042	0.4	0.7209	1	0.372786	0.498868	9	32	6	14
PF3D7_1232100	| transcript=PF3D7_1232100.1 | gene=PF3D7_1232100 | organism=Plasmodium_falciparum_3D7 | gene_product=60 kDa chaperonin | transcript_product=60 kDa chaperonin | location=Pf3D7_12_v3:1328311-1331371(-) | protein_length=718 | sequence_SO=chromosome | SO=protein_coding | is_pseudo=false	0.00049	0.0003	0.0002	0.00039	0.4	0.7195	1	0.372786	0.498868	22	18	8	18
PF3D7_1462800	| transcript=PF3D7_1462800.1 | gene=PF3D7_1462800 | organism=Plasmodium_falciparum_3D7 | gene_product=glyceraldehyde-3-phosphate dehydrogenase | transcript_product=glyceraldehyde-3-phosphate dehydrogenase | location=Pf3D7_14_v3:2559098-2560347(+) | protein_length=337 | sequence_SO=chromosome | SO=protein_coding | is_pseudo=false	0.0024	0.00275	0.00215	0.0018	0.3	0.7127	1	0.375193	0.496477	50	78	40	39
PF3D7_1126500	| transcript=PF3D7_1126500.1 | gene=PF3D7_1126500 | organism=Plasmodium_falciparum_3D7 | gene_product=WD repeat-containing protein, putative | transcript_product=WD repeat-containing protein, putative | location=Pf3D7_11_v3:1033062-1037168(+) | protein_length=1368 | sequence_SO=chromosome | SO=protein_coding | is_pseudo=false	0.00012	4e-05	3e-05	8e-05	0.5	0.7051	1	0.375192	0.496477	10	5	2	7
PF3D7_0709700	| transcript=PF3D7_0709700.1 | gene=PF3D7_0709700 | organism=Plasmodium_falciparum_3D7 | gene_product=prodrug activation and resistance esterase | transcript_product=prodrug activation and resistance esterase | location=Pf3D7_07_v3:435089-436195(-) | protein_length=368 | sequence_SO=chromosome | SO=protein_coding | is_pseudo=false	0.00039	0.00045	0.0001	0.00042	0.7	0.692	1	0.377594	0.494073	9	14	2	10
PF3D7_0823200	| transcript=PF3D7_0823200.1 | gene=PF3D7_0823200 | organism=Plasmodium_falciparum_3D7 | gene_product=RNA-binding protein, putative | transcript_product=RNA-binding protein, putative | location=Pf3D7_08_v3:1022629-1023846(-) | protein_length=286 | sequence_SO=chromosome | SO=protein_coding | is_pseudo=false	0.00136	0.00037	0.00013	0.00103	0.7	0.6825	1	0.379989	0.491655	24	9	2	19
PF3D7_1362200	| transcript=PF3D7_1362200.1 | gene=PF3D7_1362200 | organism=Plasmodium_falciparum_3D7 | gene_product=RuvB-like helicase 3 | transcript_product=RuvB-like helicase 3 | location=Pf3D7_13_v3:2490386-2491837(-) | protein_length=483 | sequence_SO=chromosome | SO=protein_coding | is_pseudo=false	0.00012	0.00042	0.00015	0.00017	0.4	0.6768	1	0.379988	0.491656	3.6	17	4	5.4
PF3D7_1459400	| transcript=PF3D7_1459400.1 | gene=PF3D7_1459400 | organism=Plasmodium_falciparum_3D7 | gene_product=conserved protein, unknown function | transcript_product=conserved protein, unknown function | location=Pf3D7_14_v3:2433361-2434383(-) | protein_length=340 | sequence_SO=chromosome | SO=protein_coding | is_pseudo=false	0.00142	0.00105	0.00096	0.00105	0.2	0.6649	1	0.382378	0.489225	30	30	18	23
PF3D7_1212700	| transcript=PF3D7_1212700.1 | gene=PF3D7_1212700 | organism=Plasmodium_falciparum_3D7 | gene_product=eukaryotic translation initiation factor 3 subunit A, putative | transcript_product=eukaryotic translation initiation factor 3 subunit A, putative | location=Pf3D7_12_v3:558047-562180(-) | protein_length=1377 | sequence_SO=chromosome | SO=protein_coding | is_pseudo=false	0.00111	0.00075	0.00022	0.00124	0.6	0.6639	1	0.382377	0.489225	95	87	17	110
PF3D7_0929200	| transcript=PF3D7_0929200.1 | gene=PF3D7_0929200 | organism=Plasmodium_falciparum_3D7 | gene_product=RNA-binding protein, putative | transcript_product=RNA-binding protein, putative | location=Pf3D7_09_v3:1167842-1169577(+) | protein_length=289 | sequence_SO=chromosome | SO=protein_coding | is_pseudo=false	0.00045	0.00029	0.00038	0.00016	0.4	0.6358	1	0.387135	0.484324	8	7	6	3
PF3D7_1368100	| transcript=PF3D7_1368100.1 | gene=PF3D7_1368100 | organism=Plasmodium_falciparum_3D7 | gene_product=26S proteasome regulatory subunit RPN11, putative | transcript_product=26S proteasome regulatory subunit RPN11, putative | location=Pf3D7_13_v3:2710406-2711718(-) | protein_length=311 | sequence_SO=chromosome | SO=protein_coding | is_pseudo=false	0.00036	0.00023	0.00029	0.00015	0.3	0.615	1	0.391866	0.479372	7	6	5	3
PF3D7_0826700	| transcript=PF3D7_0826700.1 | gene=PF3D7_0826700 | organism=Plasmodium_falciparum_3D7 | gene_product=receptor for activated c kinase | transcript_product=receptor for activated c kinase | location=Pf3D7_08_v3:1160164-1161708(-) | protein_length=323 | sequence_SO=chromosome | SO=protein_coding | is_pseudo=false	0.0004	0.00018	0.00017	0.00019	0.4	0.6131	1	0.391865	0.479372	8	5	3	4
PF3D7_1105000	| transcript=PF3D7_1105000.1 | gene=PF3D7_1105000 | organism=Plasmodium_falciparum_3D7 | gene_product=histone H4 | transcript_product=histone H4 | location=Pf3D7_11_v3:221818-222129(-) | protein_length=103 | sequence_SO=chromosome | SO=protein_coding | is_pseudo=false	0.00454	0.00242	0.0026	0.00242	0.3	0.6086	1	0.391865	0.479372	29	20.9	14.7	16
PF3D7_0714000	| transcript=PF3D7_0714000.1 | gene=PF3D7_0714000 | organism=Plasmodium_falciparum_3D7 | gene_product=histone H2B variant | transcript_product=histone H2B variant | location=Pf3D7_07_v3:643101-643472(-) | protein_length=123 | sequence_SO=chromosome | SO=protein_coding | is_pseudo=false	0.00302	0.00258	0.00074	0.00304	0.6	0.5913	1	0.396565	0.474372	23	26.7	5	24
PF3D7_1006800	| transcript=PF3D7_1006800.1 | gene=PF3D7_1006800 | organism=Plasmodium_falciparum_3D7 | gene_product=single-strand telomeric DNA-binding protein GBP2, putative | transcript_product=single-strand telomeric DNA-binding protein GBP2, putative | location=Pf3D7_10_v3:277621-279168(+) | protein_length=246 | sequence_SO=chromosome | SO=protein_coding | is_pseudo=false	0.00138	0.00034	0.00037	0.00063	0.4	0.562	1	0.401233	0.469325	21	7	5	10
PF3D7_0501600	| transcript=PF3D7_0501600.1 | gene=PF3D7_0501600 | organism=Plasmodium_falciparum_3D7 | gene_product=rhoptry-associated protein 2 | transcript_product=rhoptry-associated protein 2 | location=Pf3D7_05_v3:84041-85237(-) | protein_length=398 | sequence_SO=chromosome | SO=protein_coding | is_pseudo=false	0.00122	0.00081	0.00064	0.00098	0.2	0.5512	1	0.403555	0.466784	30	27	14	25
PF3D7_1445900	| transcript=PF3D7_1445900.1 | gene=PF3D7_1445900 | organism=Plasmodium_falciparum_3D7 | gene_product=ATP-dependent RNA helicase DDX5, putative | transcript_product=ATP-dependent RNA helicase DDX5, putative | location=Pf3D7_14_v3:1885443-1888323(+) | protein_length=527 | sequence_SO=chromosome | SO=protein_coding | is_pseudo=false	0.00012	0.00011	0.00014	6e-05	0.3	0.5469	1	0.403555	0.466784	4	5	4	2
PF3D7_0910300	| transcript=PF3D7_0910300.1 | gene=PF3D7_0910300 | organism=Plasmodium_falciparum_3D7 | gene_product=conserved protein, unknown function | transcript_product=conserved protein, unknown function | location=Pf3D7_09_v3:475671-476969(+) | protein_length=432 | sequence_SO=chromosome | SO=protein_coding | is_pseudo=false	0.00019	0.00014	0.00013	0.00014	0.2	0.527	1	0.405868	0.464233	5	5	3	4
PF3D7_0415900	| transcript=PF3D7_0415900.1 | gene=PF3D7_0415900 | organism=Plasmodium_falciparum_3D7 | gene_product=60S ribosomal protein L15, putative | transcript_product=60S ribosomal protein L15, putative | location=Pf3D7_04_v3:697918-698768(-) | protein_length=205 | sequence_SO=chromosome | SO=protein_coding | is_pseudo=false	0.00213	0.00163	0.0008	0.00228	0.3	0.5231	1	0.408172	0.461671	27	28	9	30
PF3D7_0814000	| transcript=PF3D7_0814000.1 | gene=PF3D7_0814000 | organism=Plasmodium_falciparum_3D7 | gene_product=60S ribosomal protein L13-2, putative | transcript_product=60S ribosomal protein L13-2, putative | location=Pf3D7_08_v3:680957-681809(+) | protein_length=215 | sequence_SO=chromosome | SO=protein_coding | is_pseudo=false	0.00653	0.00166	0.00084	0.00514	0.5	0.518	1	0.408172	0.461671	87	30	10	71
PF3D7_0731600	| transcript=PF3D7_0731600.1 | gene=PF3D7_0731600 | organism=Plasmodium_falciparum_3D7 | gene_product=acyl-CoA synthetase | transcript_product=acyl-CoA synthetase | location=Pf3D7_07_v3:1368161-1370596(+) | protein_length=811 | sequence_SO=chromosome | SO=protein_coding | is_pseudo=false	4e-05	0.00012	4e-05	6e-05	0.3	0.5072	1	0.410467	0.459098	2	8	2	3
PF3D7_1027800	| transcript=PF3D7_1027800.1 | gene=PF3D7_1027800 | organism=Plasmodium_falciparum_3D7 | gene_product=60S ribosomal protein L3 | transcript_product=60S ribosomal protein L3 | location=Pf3D7_10_v3:1153271-1154431(-) | protein_length=386 | sequence_SO=chromosome | SO=protein_coding | is_pseudo=false	0.00495	0.0034	0.00296	0.00423	0.2	0.495	1	0.412753	0.456515	118.3	110.3	63	105
PF3D7_1414300	| transcript=PF3D7_1414300.1 | gene=PF3D7_1414300 | organism=Plasmodium_falciparum_3D7 | gene_product=60S ribosomal protein L10, putative | transcript_product=60S ribosomal protein L10, putative | location=Pf3D7_14_v3:570802-571461(+) | protein_length=219 | sequence_SO=chromosome | SO=protein_coding | is_pseudo=false	0.00715	0.0038	0.00373	0.00462	0.2	0.4719	1	0.41503	0.453922	97	70	45	65
PF3D7_0507100	| transcript=PF3D7_0507100.1 | gene=PF3D7_0507100 | organism=Plasmodium_falciparum_3D7 | gene_product=60S ribosomal protein L4 | transcript_product=60S ribosomal protein L4 | location=Pf3D7_05_v3:294668-295903(-) | protein_length=411 | sequence_SO=chromosome | SO=protein_coding | is_pseudo=false	0.00071	0.00148	0.00062	0.00106	0.2	0.4514	1	0.419552	0.448708	18	51	14	28
PF3D7_1004000	| transcript=PF3D7_1004000.1 | gene=PF3D7_1004000 | organism=Plasmodium_falciparum_3D7 | gene_product=60S ribosomal protein L13, putative | transcript_product=60S ribosomal protein L13, putative | location=Pf3D7_10_v3:179344-180226(-) | protein_length=202 | sequence_SO=chromosome | SO=protein_coding | is_pseudo=false	0.0008	0.00041	0.00054	0.00046	0.2	0.4395	1	0.421799	0.446086	10	7	6	6
PF3D7_0304400	| transcript=PF3D7_0304400.1 | gene=PF3D7_0304400 | organism=Plasmodium_falciparum_3D7 | gene_product=60S ribosomal protein L44 | transcript_product=60S ribosomal protein L44 | location=Pf3D7_03_v3:217941-218489(+) | protein_length=104 | sequence_SO=chromosome | SO=protein_coding | is_pseudo=false	0.00078	0.00069	0.00035	0.0009	0.2	0.4344	1	0.421799	0.446086	5	6	2	6
PF3D7_1324900	| transcript=PF3D7_1324900.1 | gene=PF3D7_1324900 | organism=Plasmodium_falciparum_3D7 | gene_product=L-lactate dehydrogenase | transcript_product=L-lactate dehydrogenase | location=Pf3D7_13_v3:1041157-1042107(+) | protein_length=316 | sequence_SO=chromosome | SO=protein_coding | is_pseudo=false	0.00015	0.00072	0.00017	0.00034	0.4	0.4303	1	0.4218	0.446086	3	19	3	7
PF3D7_0206800	| transcript=PF3D7_0206800.1 | gene=PF3D7_0206800 | organism=Plasmodium_falciparum_3D7 | gene_product=merozoite surface protein 2 | transcript_product=merozoite surface protein 2 | location=Pf3D7_02_v3:273689-274507(-) | protein_length=272 | sequence_SO=chromosome | SO=protein_coding | is_pseudo=false	0.00071	0.00022	0.00013	0.00051	0.3	0.4157	1	0.42626	0.440818	12	5	2	9
PF3D7_1325100	| transcript=PF3D7_1325100.1 | gene=PF3D7_1325100 | organism=Plasmodium_falciparum_3D7 | gene_product=phosphoribosylpyrophosphate synthetase | transcript_product=phosphoribosylpyrophosphate synthetase | location=Pf3D7_13_v3:1044552-1045865(-) | protein_length=437 | sequence_SO=chromosome | SO=protein_coding | is_pseudo=false	0.00152	0.00101	0.00071	0.00139	0.2	0.3992	1	0.428475	0.43817	41	37	17	39
PF3D7_0525100	| transcript=PF3D7_0525100.1 | gene=PF3D7_0525100 | organism=Plasmodium_falciparum_3D7 | gene_product=acyl-CoA synthetase | transcript_product=acyl-CoA synthetase | location=Pf3D7_05_v3:1041745-1043766(+) | protein_length=673 | sequence_SO=chromosome | SO=protein_coding | is_pseudo=false	0	9e-05	0	5e-05	1.7	0.3942	1	0.428476	0.438169	X	5	X	2
PF3D7_0318100	| transcript=PF3D7_0318100.1 | gene=PF3D7_0318100 | organism=Plasmodium_falciparum_3D7 | gene_product=stomatin-like protein, putative | transcript_product=stomatin-like protein, putative | location=Pf3D7_03_v3:743929-745053(+) | protein_length=374 | sequence_SO=chromosome | SO=protein_coding | is_pseudo=false	0.00013	0	0	0.00017	1.5	0.3757	1	0.430681	0.435513	3	X	X	4
PF3D7_0210000	| transcript=PF3D7_0210000.1 | gene=PF3D7_0210000 | organism=Plasmodium_falciparum_3D7 | gene_product=secretory complex protein 61 gamma subunit | transcript_product=secretory complex protein 61 gamma subunit | location=Pf3D7_02_v3:409983-410228(+) | protein_length=81 | sequence_SO=chromosome | SO=protein_coding | is_pseudo=false	0.0016	0.00073	0.00112	0.00077	0.2	0.3569	1	0.435053	0.43018	8	5	5	4
PF3D7_0612100	| transcript=PF3D7_0612100.1 | gene=PF3D7_0612100 | organism=Plasmodium_falciparum_3D7 | gene_product=eukaryotic translation initiation factor 3 subunit L, putative | transcript_product=eukaryotic translation initiation factor 3 subunit L, putative | location=Pf3D7_06_v3:509160-511130(-) | protein_length=656 | sequence_SO=chromosome | SO=protein_coding | is_pseudo=false	0.00039	0.00027	0.00011	0.00059	0.3	0.346	1	0.437223	0.427502	16	15	4	25
PF3D7_0307200	| transcript=PF3D7_0307200.1 | gene=PF3D7_0307200 | organism=Plasmodium_falciparum_3D7 | gene_product=60S ribosomal protein L7, putative | transcript_product=60S ribosomal protein L7, putative | location=Pf3D7_03_v3:314976-316236(-) | protein_length=257 | sequence_SO=chromosome | SO=protein_coding | is_pseudo=false	0.00119	0.00088	0.00071	0.00121	0.1	0.3294	1	0.439381	0.424815	19	19	10	20
PF3D7_1318800	| transcript=PF3D7_1318800.1 | gene=PF3D7_1318800 | organism=Plasmodium_falciparum_3D7 | gene_product=translocation protein SEC63, putative | transcript_product=translocation protein SEC63, putative | location=Pf3D7_13_v3:774790-776745(-) | protein_length=651 | sequence_SO=chromosome | SO=protein_coding | is_pseudo=false	0.00015	0.00015	6e-05	0.00024	0.2	0.3264	1	0.439382	0.424815	6	8	2	10
PF3D7_1468700	| transcript=PF3D7_1468700.1 | gene=PF3D7_1468700 | organism=Plasmodium_falciparum_3D7 | gene_product=eukaryotic initiation factor 4A | transcript_product=eukaryotic initiation factor 4A | location=Pf3D7_14_v3:2825370-2826918(+) | protein_length=398 | sequence_SO=chromosome | SO=protein_coding | is_pseudo=false	0.00134	0.00329	0.001	0.00309	0.2	0.3073	1	0.441529	0.422122	33	110	22	79
PF3D7_0831400	| transcript=PF3D7_0831400.1 | gene=PF3D7_0831400 | organism=Plasmodium_falciparum_3D7 | gene_product=Plasmodium exported protein, unknown function | transcript_product=Plasmodium exported protein, unknown function | location=Pf3D7_08_v3:1344405-1345487(-) | protein_length=302 | sequence_SO=chromosome | SO=protein_coding | is_pseudo=false	0.00032	0.00047	0.00036	0.00036	0.1	0.2983	1	0.443662	0.419423	6	12	6	7
PF3D7_1224300	| transcript=PF3D7_1224300.1 | gene=PF3D7_1224300 | organism=Plasmodium_falciparum_3D7 | gene_product=polyadenylate-binding protein 1, putative | transcript_product=polyadenylate-binding protein 1, putative | location=Pf3D7_12_v3:988628-991255(+) | protein_length=875 | sequence_SO=chromosome | SO=protein_coding | is_pseudo=false	0.00042	0.00045	0.00012	0.00082	0.4	0.2966	1	0.443662	0.419423	23	33	6	46
PF3D7_1221000	| transcript=PF3D7_1221000.1 | gene=PF3D7_1221000 | organism=Plasmodium_falciparum_3D7 | gene_product=histone-lysine N-methyltransferase, H3 lysine-4 specific | transcript_product=histone-lysine N-methyltransferase, H3 lysine-4 specific | location=Pf3D7_12_v3:836912-843901(-) | protein_length=2329 | sequence_SO=chromosome | SO=protein_coding | is_pseudo=false	0.00051	0.00029	0.0001	0.0013	0.3	0.2748	1	0.447892	0.414007	74	56	13	194
PF3D7_1142600	| transcript=PF3D7_1142600.1 | gene=PF3D7_1142600 | organism=Plasmodium_falciparum_3D7 | gene_product=60S ribosomal protein L35ae, putative | transcript_product=60S ribosomal protein L35ae, putative | location=Pf3D7_11_v3:1708066-1708679(-) | protein_length=140 | sequence_SO=chromosome | SO=protein_coding | is_pseudo=false	0.00196	0.00238	0.00091	0.00367	0.2	0.2705	1	0.447893	0.414006	17	28	7	33
PF3D7_0503800	| transcript=PF3D7_0503800.1 | gene=PF3D7_0503800 | organism=Plasmodium_falciparum_3D7 | gene_product=60S ribosomal protein L31 | transcript_product=60S ribosomal protein L31 | location=Pf3D7_05_v3:151422-152384(-) | protein_length=120 | sequence_SO=chromosome | SO=protein_coding | is_pseudo=false	0.00175	0	0	0.00026	1.2	0.2702	1	0.447893	0.414006	13	X	X	2
PF3D7_0302100	| transcript=PF3D7_0302100.1 | gene=PF3D7_0302100 | organism=Plasmodium_falciparum_3D7 | gene_product=serine/threonine protein kinase | transcript_product=serine/threonine protein kinase | location=Pf3D7_03_v3:114070-118086(+) | protein_length=1338 | sequence_SO=chromosome | SO=protein_coding | is_pseudo=false	0	3e-05	0	3e-05	1.1	0.2494	1	0.452072	0.408569	X	3	X	3
PF3D7_0706400	| transcript=PF3D7_0706400.1 | gene=PF3D7_0706400 | organism=Plasmodium_falciparum_3D7 | gene_product=60S ribosomal protein L37 | transcript_product=60S ribosomal protein L37 | location=Pf3D7_07_v3:306855-307133(-) | protein_length=92 | sequence_SO=chromosome | SO=protein_coding | is_pseudo=false	0	0.00155	0	0.00034	1.1	0.2403	1	0.452074	0.408566	X	12	X	2
PF3D7_0722400	| transcript=PF3D7_0722400.1 | gene=PF3D7_0722400 | organism=Plasmodium_falciparum_3D7 | gene_product=Obg-like ATPase 1, putative | transcript_product=Obg-like ATPase 1, putative | location=Pf3D7_07_v3:954784-956343(+) | protein_length=393 | sequence_SO=chromosome | SO=protein_coding | is_pseudo=false	0	0.0003	0	0.00024	1	0.2286	1	0.454144	0.405839	X	10	X	6
PF3D7_1353900	| transcript=PF3D7_1353900.1 | gene=PF3D7_1353900 | organism=Plasmodium_falciparum_3D7 | gene_product=proteasome subunit alpha type-7, putative | transcript_product=proteasome subunit alpha type-7, putative | location=Pf3D7_13_v3:2154162-2155217(+) | protein_length=241 | sequence_SO=chromosome | SO=protein_coding | is_pseudo=false	0.00047	0.00035	0.00023	0.00052	0.1	0.2254	1	0.454146	0.405839	7	7	3	8
PF3D7_0106300	| transcript=PF3D7_0106300.1 | gene=PF3D7_0106300 | organism=Plasmodium_falciparum_3D7 | gene_product=calcium-transporting ATPase | transcript_product=calcium-transporting ATPase | location=Pf3D7_01_v3:265208-269173(-) | protein_length=1228 | sequence_SO=chromosome | SO=protein_coding | is_pseudo=false	0.00036	0.0007	0.00024	0.00067	0.1	0.2196	1	0.456201	0.403108	27	72	16	53
PF3D7_1360900	| transcript=PF3D7_1360900.1 | gene=PF3D7_1360900 | organism=Plasmodium_falciparum_3D7 | gene_product=RNA-binding protein, putative | transcript_product=RNA-binding protein, putative | location=Pf3D7_13_v3:2440438-2442909(-) | protein_length=389 | sequence_SO=chromosome | SO=protein_coding | is_pseudo=false	0.00029	0.00034	0.00014	0.00056	0.1	0.2034	1	0.458245	0.40037	7	11	3	14
PF3D7_0715900	| transcript=PF3D7_0715900.1 | gene=PF3D7_0715900 | organism=Plasmodium_falciparum_3D7 | gene_product=cation diffusion facilitator family protein, putative | transcript_product=cation diffusion facilitator family protein, putative | location=Pf3D7_07_v3:699239-700909(+) | protein_length=556 | sequence_SO=chromosome | SO=protein_coding | is_pseudo=false	0	6e-05	0	0.00011	0.8	0.1765	1	0.462293	0.394883	X	3	X	4
PF3D7_0108700	| transcript=PF3D7_0108700.1 | gene=PF3D7_0108700 | organism=Plasmodium_falciparum_3D7 | gene_product=secreted ookinete protein, putative | transcript_product=secreted ookinete protein, putative | location=Pf3D7_01_v3:352314-356211(-) | protein_length=1152 | sequence_SO=chromosome | SO=protein_coding | is_pseudo=false	0.00011	9e-05	6e-05	0.00012	0.1	0.1739	1	0.462294	0.394882	8	9	4	9
PF3D7_0721600	| transcript=PF3D7_0721600.1 | gene=PF3D7_0721600 | organism=Plasmodium_falciparum_3D7 | gene_product=40S ribosomal protein S5, putative | transcript_product=40S ribosomal protein S5, putative | location=Pf3D7_07_v3:931459-932164(-) | protein_length=195 | sequence_SO=chromosome | SO=protein_coding | is_pseudo=false	0.00795	0.00311	0.00279	0.0067	0.1	0.1738	1	0.462294	0.394882	96	51	30	84
PF3D7_1006700	| transcript=PF3D7_1006700.1 | gene=PF3D7_1006700 | organism=Plasmodium_falciparum_3D7 | gene_product=conserved Plasmodium protein, unknown function | transcript_product=conserved Plasmodium protein, unknown function | location=Pf3D7_10_v3:274091-275426(+) | protein_length=383 | sequence_SO=chromosome | SO=protein_coding | is_pseudo=false	0.00017	0.00012	9e-05	0.0002	0.1	0.1703	1	0.462295	0.394881	4	4	2	5
PF3D7_0317600	| transcript=PF3D7_0317600.1 | gene=PF3D7_0317600 | organism=Plasmodium_falciparum_3D7 | gene_product=40S ribosomal protein S11, putative | transcript_product=40S ribosomal protein S11, putative | location=Pf3D7_03_v3:725015-726130(+) | protein_length=161 | sequence_SO=chromosome | SO=protein_coding | is_pseudo=false	0.00923	0.00414	0.0035	0.00841	0.1	0.1698	1	0.464295	0.392137	92	56	31	87
PF3D7_0813300	| transcript=PF3D7_0813300.1 | gene=PF3D7_0813300 | organism=Plasmodium_falciparum_3D7 | gene_product=conserved protein, unknown function | transcript_product=conserved protein, unknown function | location=Pf3D7_08_v3:656078-657630(+) | protein_length=315 | sequence_SO=chromosome | SO=protein_coding | is_pseudo=false	0.00051	0.00038	0.00052	0.00035	0.1	0.1671	1	0.464295	0.392135	10	10	9	7
PF3D7_0208800	| transcript=PF3D7_0208800.1 | gene=PF3D7_0208800 | organism=Plasmodium_falciparum_3D7 | gene_product=conserved Plasmodium protein, unknown function | transcript_product=conserved Plasmodium protein, unknown function | location=Pf3D7_02_v3:359142-359849(+) | protein_length=235 | sequence_SO=chromosome | SO=protein_coding | is_pseudo=false	0.00062	0.0003	0.00031	0.00053	0.1	0.166	1	0.464295	0.392134	9	6	4	8
PF3D7_1320600	| transcript=PF3D7_1320600.1 | gene=PF3D7_1320600 | organism=Plasmodium_falciparum_3D7 | gene_product=ras-related protein Rab-11A | transcript_product=ras-related protein Rab-11A | location=Pf3D7_13_v3:847090-848383(+) | protein_length=216 | sequence_SO=chromosome | SO=protein_coding | is_pseudo=false	0.00127	0.0011	0.0005	0.00209	0.1	0.1649	1	0.464296	0.392134	17	20	6	29
PF3D7_1446600	| transcript=PF3D7_1446600.1 | gene=PF3D7_1446600 | organism=Plasmodium_falciparum_3D7 | gene_product=centrin-2 | transcript_product=centrin-2 | location=Pf3D7_14_v3:1917232-1918010(-) | protein_length=168 | sequence_SO=chromosome | SO=protein_coding | is_pseudo=false	0.00038	0	0	0.00019	0.7	0.1621	1	0.464296	0.392133	4	X	X	2
PF3D7_1311800	| transcript=PF3D7_1311800.1 | gene=PF3D7_1311800 | organism=Plasmodium_falciparum_3D7 | gene_product=M1-family alanyl aminopeptidase | transcript_product=M1-family alanyl aminopeptidase | location=Pf3D7_13_v3:501790-505047(+) | protein_length=1085 | sequence_SO=chromosome | SO=protein_coding | is_pseudo=false	4e-05	0	0	4e-05	0.5	0.1604	1	0.464297	0.392132	3	X	X	3
PF3D7_0309600	| transcript=PF3D7_0309600.1 | gene=PF3D7_0309600 | organism=Plasmodium_falciparum_3D7 | gene_product=60S acidic ribosomal protein P2 | transcript_product=60S acidic ribosomal protein P2 | location=Pf3D7_03_v3:407980-408318(+) | protein_length=112 | sequence_SO=chromosome | SO=protein_coding | is_pseudo=false	0.00404	0.00128	0.00162	0.00264	0.1	0.1594	1	0.464297	0.392132	28	12	10	19
PF3D7_1247400	| transcript=PF3D7_1247400.1 | gene=PF3D7_1247400 | organism=Plasmodium_falciparum_3D7 | gene_product=peptidyl-prolyl cis-trans isomerase FKBP35 | transcript_product=peptidyl-prolyl cis-trans isomerase FKBP35 | location=Pf3D7_12_v3:1955124-1956038(-) | protein_length=304 | sequence_SO=chromosome | SO=protein_coding | is_pseudo=false	0	8e-05	0	0.00026	0.5	0.1403	1	0.468259	0.386626	X	2	X	5
PF3D7_1020900	| transcript=PF3D7_1020900.1 | gene=PF3D7_1020900 | organism=Plasmodium_falciparum_3D7 | gene_product=ADP-ribosylation factor | transcript_product=ADP-ribosylation factor | location=Pf3D7_10_v3:845086-846192(-) | protein_length=181 | sequence_SO=chromosome | SO=protein_coding | is_pseudo=false	0	0.00039	0.00028	0	0.6	0.1376	1	0.46826	0.386625	X	6	2.8	X
PF3D7_0322900	| transcript=PF3D7_0322900.1 | gene=PF3D7_0322900 | organism=Plasmodium_falciparum_3D7 | gene_product=40S ribosomal protein S3A, putative | transcript_product=40S ribosomal protein S3A, putative | location=Pf3D7_03_v3:965553-966502(-) | protein_length=262 | sequence_SO=chromosome | SO=protein_coding | is_pseudo=false	0.00049	0.00055	0.00021	0.00101	0.1	0.124	1	0.47022	0.383866	8	12	3	17
PF3D7_0619400	| transcript=PF3D7_0619400.1 | gene=PF3D7_0619400 | organism=Plasmodium_falciparum_3D7 | gene_product=cell division cycle protein 48 homologue, putative | transcript_product=cell division cycle protein 48 homologue, putative | location=Pf3D7_06_v3:815622-818247(-) | protein_length=828 | sequence_SO=chromosome | SO=protein_coding | is_pseudo=false	0.00358	0.00338	0.00245	0.00452	0.1	0.1222	1	0.470221	0.383865	183.8	235.4	111.8	240.6
PF3D7_0818900	| transcript=PF3D7_0818900.1 | gene=PF3D7_0818900 | organism=Plasmodium_falciparum_3D7 | gene_product=heat shock protein 70 | transcript_product=heat shock protein 70 | location=Pf3D7_08_v3:860384-862417(+) | protein_length=677 | sequence_SO=chromosome | SO=protein_coding | is_pseudo=false	0.00196	0.00197	0.0013	0.00275	0	0.102	1	0.47217	0.381102	82.4	112	48.6	119.7
PF3D7_1142100	| transcript=PF3D7_1142100.1 | gene=PF3D7_1142100 | organism=Plasmodium_falciparum_3D7 | gene_product=conserved Plasmodium protein, unknown function | transcript_product=conserved Plasmodium protein, unknown function | location=Pf3D7_11_v3:1681868-1690084(-) | protein_length=2738 | sequence_SO=chromosome | SO=protein_coding | is_pseudo=false	0	1e-05	0	1e-05	0.4	0.0913	1	0.4741	0.378339	X	3	X	2
PF3D7_0108000	| transcript=PF3D7_0108000.1 | gene=PF3D7_0108000 | organism=Plasmodium_falciparum_3D7 | gene_product=proteasome subunit beta type-3, putative | transcript_product=proteasome subunit beta type-3, putative | location=Pf3D7_01_v3:328431-329558(-) | protein_length=218 | sequence_SO=chromosome | SO=protein_coding | is_pseudo=false	0.00044	0.00011	0.00017	0.00029	0.1	0.0815	1	0.476015	0.375574	6	2	2	4
PF3D7_0507700	| transcript=PF3D7_0507700.1 | gene=PF3D7_0507700 | organism=Plasmodium_falciparum_3D7 | gene_product=nuclear protein localization protein 4, putative | transcript_product=nuclear protein localization protein 4, putative | location=Pf3D7_05_v3:316766-318361(-) | protein_length=531 | sequence_SO=chromosome | SO=protein_coding | is_pseudo=false	0.0003	0.00011	0.0001	0.00032	0	0.0792	1	0.476016	0.375573	10	5	3	11
PF3D7_1103600	| transcript=PF3D7_1103600.1 | gene=PF3D7_1103600 | organism=Plasmodium_falciparum_3D7 | gene_product=actin-like protein, putative | transcript_product=actin-like protein, putative | location=Pf3D7_11_v3:156614-158113(+) | protein_length=499 | sequence_SO=chromosome | SO=protein_coding | is_pseudo=false	0	0.00012	0	6e-05	0.3	0.0773	1	0.476017	0.375572	X	5	X	2
PF3D7_1460700	| transcript=PF3D7_1460700.1 | gene=PF3D7_1460700 | organism=Plasmodium_falciparum_3D7 | gene_product=60S ribosomal protein L27 | transcript_product=60S ribosomal protein L27 | location=Pf3D7_14_v3:2475501-2476473(-) | protein_length=146 | sequence_SO=chromosome | SO=protein_coding | is_pseudo=false	0.00033	0.00016	0.00025	0.00021	0	0.0596	1	0.479804	0.37004	3	2	2	2
PF3D7_1408600	| transcript=PF3D7_1408600.1 | gene=PF3D7_1408600 | organism=Plasmodium_falciparum_3D7 | gene_product=40S ribosomal protein S8e, putative | transcript_product=40S ribosomal protein S8e, putative | location=Pf3D7_14_v3:323317-324172(+) | protein_length=218 | sequence_SO=chromosome | SO=protein_coding | is_pseudo=false	0.00296	0.00093	0.00133	0.00207	0	0.0537	1	0.479805	0.370036	40	17	16	29
PF3D7_1432100	| transcript=PF3D7_1432100.1 | gene=PF3D7_1432100 | organism=Plasmodium_falciparum_3D7 | gene_product=voltage-dependent anion-selective channel protein, putative | transcript_product=voltage-dependent anion-selective channel protein, putative | location=Pf3D7_14_v3:1260908-1262826(+) | protein_length=289 | sequence_SO=chromosome | SO=protein_coding | is_pseudo=false	0.00201	0.00012	0.00013	0.00307	0.1	0.0486	1	0.479807	0.370035	36	3	2	57
PF3D7_0511800	| transcript=PF3D7_0511800.1 | gene=PF3D7_0511800 | organism=Plasmodium_falciparum_3D7 | gene_product=inositol-3-phosphate synthase | transcript_product=inositol-3-phosphate synthase | location=Pf3D7_05_v3:520720-522693(-) | protein_length=604 | sequence_SO=chromosome | SO=protein_coding | is_pseudo=false	0	6e-05	0	5e-05	0.2	0.0385	1	0.481677	0.367265	X	3	X	2
PF3D7_1328100	| transcript=PF3D7_1328100.1 | gene=PF3D7_1328100 | organism=Plasmodium_falciparum_3D7 | gene_product=proteasome subunit beta type-7, putative | transcript_product=proteasome subunit beta type-7, putative | location=Pf3D7_13_v3:1184208-1185020(+) | protein_length=270 | sequence_SO=chromosome | SO=protein_coding | is_pseudo=false	0.00018	9e-05	0.00013	0.00012	0	0.0341	1	0.481679	0.367264	3	2	2	2
PF3D7_0422400	| transcript=PF3D7_0422400.1 | gene=PF3D7_0422400 | organism=Plasmodium_falciparum_3D7 | gene_product=40S ribosomal protein S19 | transcript_product=40S ribosomal protein S19 | location=Pf3D7_04_v3:1026648-1027399(+) | protein_length=170 | sequence_SO=chromosome | SO=protein_coding | is_pseudo=false	0.00446	0.00371	0.0047	0.00339	0	0.0326	1	0.483532	0.364498	47	53	44	37
PF3D7_0710600	| transcript=PF3D7_0710600.1 | gene=PF3D7_0710600 | organism=Plasmodium_falciparum_3D7 | gene_product=60S ribosomal protein L34 | transcript_product=60S ribosomal protein L34 | location=Pf3D7_07_v3:478468-479138(-) | protein_length=150 | sequence_SO=chromosome | SO=protein_coding | is_pseudo=false	0	0.00063	0	0.00052	0.1	0.0309	1	0.483532	0.364496	X	8	X	5
PF3D7_0804500	| transcript=PF3D7_0804500.1 | gene=PF3D7_0804500 | organism=Plasmodium_falciparum_3D7 | gene_product=conserved Plasmodium membrane protein, unknown function | transcript_product=conserved Plasmodium membrane protein, unknown function | location=Pf3D7_08_v3:250083-268437(+) | protein_length=6034 | sequence_SO=chromosome | SO=protein_coding | is_pseudo=false	1e-05	0	0	1e-05	0.1	0.0307	1	0.483532	0.364496	2	X	X	2
PF3D7_1007900	| transcript=PF3D7_1007900.1 | gene=PF3D7_1007900 | organism=Plasmodium_falciparum_3D7 | gene_product=eukaryotic translation initiation factor 3 subunit D, putative | transcript_product=eukaryotic translation initiation factor 3 subunit D, putative | location=Pf3D7_10_v3:316649-318280(+) | protein_length=543 | sequence_SO=chromosome | SO=protein_coding | is_pseudo=false	6e-05	0	0	9e-05	0.1	0.0222	1	0.483535	0.364492	2	X	X	3
PF3D7_1211400	| transcript=PF3D7_1211400.1 | gene=PF3D7_1211400 | organism=Plasmodium_falciparum_3D7 | gene_product=heat shock protein DNAJ homologue Pfj4 | transcript_product=heat shock protein DNAJ homologue Pfj4 | location=Pf3D7_12_v3:505344-506662(+) | protein_length=244 | sequence_SO=chromosome | SO=protein_coding | is_pseudo=false	0	0.00059	0	0.00026	0.1	0.0214	1	0.483535	0.364492	X	12	X	4
PF3D7_1036900	| transcript=PF3D7_1036900.1 | gene=PF3D7_1036900 | organism=Plasmodium_falciparum_3D7 | gene_product=conserved Plasmodium protein, unknown function | transcript_product=conserved Plasmodium protein, unknown function | location=Pf3D7_10_v3:1452599-1458006(-) | protein_length=1681 | sequence_SO=chromosome | SO=protein_coding | is_pseudo=false	0.00023	7e-05	9e-05	0.00023	0	0.0089	1	0.485376	0.36172	24	10	8	25
PF3D7_1418000	| transcript=PF3D7_1418000.1 | gene=PF3D7_1418000 | organism=Plasmodium_falciparum_3D7 | gene_product=ubiquitin fusion degradation protein 1, putative | transcript_product=ubiquitin fusion degradation protein 1, putative | location=Pf3D7_14_v3:759360-761422(-) | protein_length=282 | sequence_SO=chromosome | SO=protein_coding | is_pseudo=false	0.00029	0	0	0.00039	0	0.0072	1	0.485377	0.36172	5	X	X	7
PF3D7_0413600	| transcript=PF3D7_0413600.1 | gene=PF3D7_0413600 | organism=Plasmodium_falciparum_3D7 | gene_product=26S protease regulatory subunit 6B, putative | transcript_product=26S protease regulatory subunit 6B, putative | location=Pf3D7_04_v3:616914-618350(-) | protein_length=392 | sequence_SO=chromosome | SO=protein_coding | is_pseudo=false	0	9e-05	0	0.00012	0	0.0046	1	0.487199	0.358952	X	3	X	3
PF3D7_1415400	| transcript=PF3D7_1415400.1 | gene=PF3D7_1415400 | organism=Plasmodium_falciparum_3D7 | gene_product=conserved Plasmodium protein, unknown function | transcript_product=conserved Plasmodium protein, unknown function | location=Pf3D7_14_v3:618897-623321(+) | protein_length=1474 | sequence_SO=chromosome | SO=protein_coding | is_pseudo=false	4e-05	0	0	3e-05	0	-0.0045	1	0.487202	0.358947	4	X	X	3
PF3D7_0205900	| transcript=PF3D7_0205900.1 | gene=PF3D7_0205900 | organism=Plasmodium_falciparum_3D7 | gene_product=26S proteasome regulatory subunit RPN1, putative | transcript_product=26S proteasome regulatory subunit RPN1, putative | location=Pf3D7_02_v3:235237-238816(+) | protein_length=966 | sequence_SO=chromosome | SO=protein_coding | is_pseudo=false	0	0.00018	0	6e-05	-0.1	-0.0243	1	0.490804	0.353406	X	15	X	4
PF3D7_1010600	| transcript=PF3D7_1010600.1 | gene=PF3D7_1010600 | organism=Plasmodium_falciparum_3D7 | gene_product=eukaryotic translation initiation factor 2 subunit beta | transcript_product=eukaryotic translation initiation factor 2 subunit beta | location=Pf3D7_10_v3:420185-421056(-) | protein_length=222 | sequence_SO=chromosome | SO=protein_coding | is_pseudo=false	0.00015	0.00016	0.00016	0.00014	0	-0.0271	1	0.490804	0.353404	2	3	2	2
PF3D7_0517000	| transcript=PF3D7_0517000.1 | gene=PF3D7_0517000 | organism=Plasmodium_falciparum_3D7 | gene_product=60S ribosomal protein L12, putative | transcript_product=60S ribosomal protein L12, putative | location=Pf3D7_05_v3:715765-716675(-) | protein_length=165 | sequence_SO=chromosome | SO=protein_coding | is_pseudo=false	0.00039	0	0	0.00038	-0.1	-0.0334	1	0.490807	0.353401	4	X	X	4
PF3D7_0811600	| transcript=PF3D7_0811600.1 | gene=PF3D7_0811600 | organism=Plasmodium_falciparum_3D7 | gene_product=conserved protein, unknown function | transcript_product=conserved protein, unknown function | location=Pf3D7_08_v3:582983-586953(-) | protein_length=1210 | sequence_SO=chromosome | SO=protein_coding | is_pseudo=false	4e-05	9e-05	5e-05	9e-05	0	-0.0422	1	0.492583	0.350631	3	9	3	7
PF3D7_1464600	| transcript=PF3D7_1464600.1 | gene=PF3D7_1464600 | organism=Plasmodium_falciparum_3D7 | gene_product=serine/threonine protein phosphatase UIS2, putative | transcript_product=serine/threonine protein phosphatase UIS2, putative | location=Pf3D7_14_v3:2619679-2624187(+) | protein_length=1442 | sequence_SO=chromosome | SO=protein_coding | is_pseudo=false	2e-05	0	0	3e-05	-0.2	-0.0428	1	0.492583	0.350631	2	X	X	3
PF3D7_0405700	| transcript=PF3D7_0405700.1 | gene=PF3D7_0405700 | organism=Plasmodium_falciparum_3D7 | gene_product=lysine decarboxylase, putative | transcript_product=lysine decarboxylase, putative | location=Pf3D7_04_v3:305746-312993(-) | protein_length=2415 | sequence_SO=chromosome | SO=protein_coding | is_pseudo=false	1e-05	0	0	2e-05	-0.2	-0.0471	1	0.492586	0.350629	2	X	X	3
PF3D7_1242700	| transcript=PF3D7_1242700.1 | gene=PF3D7_1242700 | organism=Plasmodium_falciparum_3D7 | gene_product=40S ribosomal protein S17, putative | transcript_product=40S ribosomal protein S17, putative | location=Pf3D7_12_v3:1803653-1804483(+) | protein_length=137 | sequence_SO=chromosome | SO=protein_coding | is_pseudo=false	0.00141	0.00061	0.00066	0.00136	0	-0.052	1	0.494345	0.347862	12	7	5	12
PF3D7_1423700	| transcript=PF3D7_1423700.1 | gene=PF3D7_1423700 | organism=Plasmodium_falciparum_3D7 | gene_product=conserved Plasmodium protein, unknown function | transcript_product=conserved Plasmodium protein, unknown function | location=Pf3D7_14_v3:959074-963750(-) | protein_length=1558 | sequence_SO=chromosome | SO=protein_coding | is_pseudo=false	5e-05	0	0	6e-05	-0.2	-0.0522	1	0.494345	0.347862	5	X	X	6
PF3D7_1212900	| transcript=PF3D7_1212900.1 | gene=PF3D7_1212900 | organism=Plasmodium_falciparum_3D7 | gene_product=bromodomain protein 2, putative | transcript_product=bromodomain protein 2, putative | location=Pf3D7_12_v3:568569-571835(-) | protein_length=1088 | sequence_SO=chromosome | SO=protein_coding | is_pseudo=false	9e-05	0	0	6e-05	-0.2	-0.0654	1	0.496091	0.345092	6	X	X	4
PF3D7_0726400	| transcript=PF3D7_0726400.1 | gene=PF3D7_0726400 | organism=Plasmodium_falciparum_3D7 | gene_product=conserved Plasmodium membrane protein, unknown function | transcript_product=conserved Plasmodium membrane protein, unknown function | location=Pf3D7_07_v3:1108831-1124492(-) | protein_length=4944 | sequence_SO=chromosome | SO=protein_coding | is_pseudo=false	1e-05	0	0	1e-05	-0.3	-0.067	1	0.496092	0.34509	3	X	X	3
PF3D7_1437200	| transcript=PF3D7_1437200.1 | gene=PF3D7_1437200 | organism=Plasmodium_falciparum_3D7 | gene_product=ribonucleoside-diphosphate reductase large subunit, putative | transcript_product=ribonucleoside-diphosphate reductase large subunit, putative | location=Pf3D7_14_v3:1507359-1510089(-) | protein_length=847 | sequence_SO=chromosome | SO=protein_coding | is_pseudo=false	4e-05	0	0	7e-05	-0.3	-0.0747	1	0.496095	0.345087	2	X	X	4
PF3D7_1239600	| transcript=PF3D7_1239600.1 | gene=PF3D7_1239600 | organism=Plasmodium_falciparum_3D7 | gene_product=hydroxyethylthiazole kinase | transcript_product=hydroxyethylthiazole kinase | location=Pf3D7_12_v3:1652936-1653844(-) | protein_length=302 | sequence_SO=chromosome | SO=protein_coding | is_pseudo=false	0	8e-05	0	0.0001	-0.3	-0.0797	1	0.497822	0.342322	X	2	X	2
PF3D7_1033600	| transcript=PF3D7_1033600.1 | gene=PF3D7_1033600 | organism=Plasmodium_falciparum_3D7 | gene_product=pre-mRNA-splicing factor CEF1, putative | transcript_product=pre-mRNA-splicing factor CEF1, putative | location=Pf3D7_10_v3:1344150-1346897(-) | protein_length=915 | sequence_SO=chromosome | SO=protein_coding | is_pseudo=false	4e-05	0	0	3e-05	-0.3	-0.0843	1	0.497823	0.342319	2	X	X	2
PF3D7_0716800	| transcript=PF3D7_0716800.1 | gene=PF3D7_0716800 | organism=Plasmodium_falciparum_3D7 | gene_product=eukaryotic translation initiation factor 3 subunit I, putative | transcript_product=eukaryotic translation initiation factor 3 subunit I, putative | location=Pf3D7_07_v3:732070-733496(-) | protein_length=327 | sequence_SO=chromosome | SO=protein_coding | is_pseudo=false	0.00059	0.00113	0.00033	0.00205	-0.1	-0.0859	1	0.497824	0.342318	12	31	6	43
PF3D7_1370300	| transcript=PF3D7_1370300.1 | gene=PF3D7_1370300 | organism=Plasmodium_falciparum_3D7 | gene_product=membrane associated histidine-rich protein 1 | transcript_product=membrane associated histidine-rich protein 1 | location=Pf3D7_13_v3:2787972-2788913(+) | protein_length=249 | sequence_SO=chromosome | SO=protein_coding | is_pseudo=false	0.00934	0.00454	0.00197	0.02618	-0.1	-0.0913	1	0.499536	0.339556	144	95	27	419
PF3D7_0302200	| transcript=PF3D7_0302200.1 | gene=PF3D7_0302200 | organism=Plasmodium_falciparum_3D7 | gene_product=cytoadherence linked asexual protein 3.2 | transcript_product=cytoadherence linked asexual protein 3.2 | location=Pf3D7_03_v3:119458-124735(+) | protein_length=1416 | sequence_SO=chromosome | SO=protein_coding | is_pseudo=false	0	5e-05	0	0.00036	-0.4	-0.0918	1	0.499536	0.339556	0	6.5	0	33
PF3D7_1239700	| transcript=PF3D7_1239700.1 | gene=PF3D7_1239700 | organism=Plasmodium_falciparum_3D7 | gene_product=ATP-dependent zinc metalloprotease FTSH 1 | transcript_product=ATP-dependent zinc metalloprotease FTSH 1 | location=Pf3D7_12_v3:1655487-1658129(+) | protein_length=880 | sequence_SO=chromosome | SO=protein_coding | is_pseudo=false	0.00013	0.00011	8e-05	0.00018	0	-0.0978	1	0.499537	0.339551	7	8	4	10
PF3D7_0904800	| transcript=PF3D7_0904800.1 | gene=PF3D7_0904800 | organism=Plasmodium_falciparum_3D7 | gene_product=replication protein A1, small fragment | transcript_product=replication protein A1, small fragment | location=Pf3D7_09_v3:222271-224156(+) | protein_length=484 | sequence_SO=chromosome | SO=protein_coding | is_pseudo=false	0	0.00015	0	0.00013	-0.4	-0.0981	1	0.499537	0.339551	X	6	X	4
PF3D7_1359600	| transcript=PF3D7_1359600.1 | gene=PF3D7_1359600 | organism=Plasmodium_falciparum_3D7 | gene_product=conserved Plasmodium protein, unknown function | transcript_product=conserved Plasmodium protein, unknown function | location=Pf3D7_13_v3:2371882-2377959(+) | protein_length=2025 | sequence_SO=chromosome | SO=protein_coding | is_pseudo=false	2e-05	0	0	2e-05	-0.4	-0.1011	1	0.499539	0.33955	2	X	X	3
PF3D7_1412300	| transcript=PF3D7_1412300.1 | gene=PF3D7_1412300 | organism=Plasmodium_falciparum_3D7 | gene_product=nuclear transport factor 2, putative | transcript_product=nuclear transport factor 2, putative | location=Pf3D7_14_v3:491494-492221(-) | protein_length=125 | sequence_SO=chromosome | SO=protein_coding | is_pseudo=false	0.00026	0	0.00073	0	-0.4	-0.1092	1	0.501234	0.336787	2	X	5	X
PF3D7_0305500	| transcript=PF3D7_0305500.1 | gene=PF3D7_0305500 | organism=Plasmodium_falciparum_3D7 | gene_product=conserved Plasmodium protein, unknown function | transcript_product=conserved Plasmodium protein, unknown function | location=Pf3D7_03_v3:261485-273286(-) | protein_length=3933 | sequence_SO=chromosome | SO=protein_coding | is_pseudo=false	9e-05	0.00011	4e-05	0.00033	-0.1	-0.1109	1	0.501235	0.336786	23	38	9	83
PF3D7_0708400	| transcript=PF3D7_0708400.1 | gene=PF3D7_0708400 | organism=Plasmodium_falciparum_3D7 | gene_product=heat shock protein 90 | transcript_product=heat shock protein 90 | location=Pf3D7_07_v3:381592-384614(+) | protein_length=745 | sequence_SO=chromosome | SO=protein_coding | is_pseudo=false	0.00035	0.00065	0.00039	0.00067	-0.1	-0.1184	1	0.502915	0.334027	16	41	16	32
PF3D7_0416800	| transcript=PF3D7_0416800.1 | gene=PF3D7_0416800 | organism=Plasmodium_falciparum_3D7 | gene_product=small GTP-binding protein sar1 | transcript_product=small GTP-binding protein sar1 | location=Pf3D7_04_v3:729962-731223(+) | protein_length=192 | sequence_SO=chromosome | SO=protein_coding | is_pseudo=false	0.00067	0.00074	0.00066	0.00081	0	-0.1345	1	0.50458	0.331263	8	12	7	10
PF3D7_1323500	| transcript=PF3D7_1323500.1 | gene=PF3D7_1323500 | organism=Plasmodium_falciparum_3D7 | gene_product=plasmepsin V | transcript_product=plasmepsin V | location=Pf3D7_13_v3:975403-977175(+) | protein_length=590 | sequence_SO=chromosome | SO=protein_coding | is_pseudo=false	0.00014	6e-05	6e-05	0.00018	-0.1	-0.1444	1	0.504585	0.331259	5	3	2	7
PF3D7_1322300	| transcript=PF3D7_1322300.1 | gene=PF3D7_1322300 | organism=Plasmodium_falciparum_3D7 | gene_product=conserved Plasmodium protein, unknown function | transcript_product=conserved Plasmodium protein, unknown function | location=Pf3D7_13_v3:944275-949285(-) | protein_length=1499 | sequence_SO=chromosome | SO=protein_coding | is_pseudo=false	5e-05	0	0	0.00025	-0.6	-0.1489	1	0.506228	0.328504	5	X	X	24
PF3D7_1119900	| transcript=PF3D7_1119900.1 | gene=PF3D7_1119900 | organism=Plasmodium_falciparum_3D7 | gene_product=protein transport protein SEC16, putative | transcript_product=protein transport protein SEC16, putative | location=Pf3D7_11_v3:749152-754401(+) | protein_length=1749 | sequence_SO=chromosome | SO=protein_coding | is_pseudo=false	2e-05	0	0	3e-05	-0.5	-0.1549	1	0.506231	0.3285	2	X	X	3
PF3D7_1330600	| transcript=PF3D7_1330600.1 | gene=PF3D7_1330600 | organism=Plasmodium_falciparum_3D7 | gene_product=elongation factor Tu, putative | transcript_product=elongation factor Tu, putative | location=Pf3D7_13_v3:1287891-1289408(-) | protein_length=505 | sequence_SO=chromosome | SO=protein_coding | is_pseudo=false	0	0.00012	0	6e-05	-0.8	-0.1847	1	0.509479	0.322991	X	5	X	2
PF3D7_1249800	| transcript=PF3D7_1249800.1 | gene=PF3D7_1249800 | organism=Plasmodium_falciparum_3D7 | gene_product=THO complex subunit 2, putative | transcript_product=THO complex subunit 2, putative | location=Pf3D7_12_v3:2030004-2039852(-) | protein_length=2932 | sequence_SO=chromosome | SO=protein_coding | is_pseudo=false	0	1e-05	0	2e-05	-0.7	-0.2027	1	0.512653	0.317501	X	2	X	3
PF3D7_0214100	| transcript=PF3D7_0214100.1 | gene=PF3D7_0214100 | organism=Plasmodium_falciparum_3D7 | gene_product=protein transport protein SEC31 | transcript_product=protein transport protein SEC31 | location=Pf3D7_02_v3:568529-573315(-) | protein_length=1471 | sequence_SO=chromosome | SO=protein_coding | is_pseudo=false	0	3e-05	2e-05	0	-0.9	-0.2159	1	0.514217	0.31476	X	4	2	X
PF3D7_0912400	| transcript=PF3D7_0912400.1 | gene=PF3D7_0912400 | organism=Plasmodium_falciparum_3D7 | gene_product=alkaline phosphatase, putative | transcript_product=alkaline phosphatase, putative | location=Pf3D7_09_v3:551426-553167(-) | protein_length=446 | sequence_SO=chromosome | SO=protein_coding | is_pseudo=false	7e-05	0	0	0.00014	-0.9	-0.2169	1	0.514217	0.314759	2	X	X	4
PF3D7_1309100	| transcript=PF3D7_1309100.1 | gene=PF3D7_1309100 | organism=Plasmodium_falciparum_3D7 | gene_product=60S ribosomal protein L24, putative | transcript_product=60S ribosomal protein L24, putative | location=Pf3D7_13_v3:418820-420121(+) | protein_length=162 | sequence_SO=chromosome | SO=protein_coding | is_pseudo=false	0	0.00015	0	0.00019	-1	-0.2218	1	0.514219	0.314756	X	2	X	2
PF3D7_1347500	| transcript=PF3D7_1347500.1 | gene=PF3D7_1347500 | organism=Plasmodium_falciparum_3D7 | gene_product=DNA/RNA-binding protein Alba 4 | transcript_product=DNA/RNA-binding protein Alba 4 | location=Pf3D7_13_v3:1897983-1899362(-) | protein_length=372 | sequence_SO=chromosome | SO=protein_coding | is_pseudo=false	0.00104	0.00026	0.00068	0.0005	-0.2	-0.2404	1	0.51577	0.312017	24	8	14	12
PF3D7_1026800	| transcript=PF3D7_1026800.1 | gene=PF3D7_1026800 | organism=Plasmodium_falciparum_3D7 | gene_product=40S ribosomal protein S2 | transcript_product=40S ribosomal protein S2 | location=Pf3D7_10_v3:1122962-1124037(+) | protein_length=263 | sequence_SO=chromosome | SO=protein_coding | is_pseudo=false	0	0.00014	0	0.00018	-1	-0.2457	1	0.517294	0.309288	X	3	X	3
PF3D7_0523400	| transcript=PF3D7_0523400.1 | gene=PF3D7_0523400 | organism=Plasmodium_falciparum_3D7 | gene_product=DnaJ protein, putative | transcript_product=DnaJ protein, putative | location=Pf3D7_05_v3:973518-975876(+) | protein_length=533 | sequence_SO=chromosome | SO=protein_coding | is_pseudo=false	0	4e-05	0	6e-05	-0.9	-0.2505	1	0.517297	0.309285	X	2	X	2
PF3D7_1306400	| transcript=PF3D7_1306400.1 | gene=PF3D7_1306400 | organism=Plasmodium_falciparum_3D7 | gene_product=26S protease regulatory subunit 10B, putative | transcript_product=26S protease regulatory subunit 10B, putative | location=Pf3D7_13_v3:297178-298359(-) | protein_length=393 | sequence_SO=chromosome | SO=protein_coding | is_pseudo=false	0	0.00015	0	0.00016	-1.1	-0.2559	1	0.518806	0.306563	X	5	X	4
PF3D7_1211900	| transcript=PF3D7_1211900.1 | gene=PF3D7_1211900 | organism=Plasmodium_falciparum_3D7 | gene_product=non-SERCA-type Ca2+ -transporting P-ATPase | transcript_product=non-SERCA-type Ca2+ -transporting P-ATPase | location=Pf3D7_12_v3:529005-532799(-) | protein_length=1264 | sequence_SO=chromosome | SO=protein_coding | is_pseudo=false	0.00017	0.00036	0.00019	0.00044	-0.2	-0.2684	1	0.520302	0.303842	13	38	13	36
PF3D7_1447900	| transcript=PF3D7_1447900.1 | gene=PF3D7_1447900 | organism=Plasmodium_falciparum_3D7 | gene_product=multidrug resistance protein 2 | transcript_product=multidrug resistance protein 2 | location=Pf3D7_14_v3:1954601-1957675(-) | protein_length=1024 | sequence_SO=chromosome | SO=protein_coding | is_pseudo=false	0.00032	0.00048	0.00027	0.00085	-0.2	-0.2777	1	0.520305	0.303834	20	41	15	56
PF3D7_1455500	| transcript=PF3D7_1455500.1 | gene=PF3D7_1455500 | organism=Plasmodium_falciparum_3D7 | gene_product=AP-1 complex subunit gamma, putative | transcript_product=AP-1 complex subunit gamma, putative | location=Pf3D7_14_v3:2267201-2270851(+) | protein_length=1081 | sequence_SO=chromosome | SO=protein_coding | is_pseudo=false	3e-05	0	0	6e-05	-1.1	-0.2802	1	0.520307	0.303833	2	X	X	4
PF3D7_1304500	| transcript=PF3D7_1304500.1 | gene=PF3D7_1304500 | organism=Plasmodium_falciparum_3D7 | gene_product=small heat shock protein, putative | transcript_product=small heat shock protein, putative | location=Pf3D7_13_v3:235800-236435(-) | protein_length=211 | sequence_SO=chromosome | SO=protein_coding | is_pseudo=false	0	0.00034	0	0.00022	-1.2	-0.2872	1	0.521781	0.301118	X	6	X	3
PF3D7_0919100	| transcript=PF3D7_0919100.1 | gene=PF3D7_0919100 | organism=Plasmodium_falciparum_3D7 | gene_product=DnaJ protein, putative | transcript_product=DnaJ protein, putative | location=Pf3D7_09_v3:786156-788212(+) | protein_length=370 | sequence_SO=chromosome | SO=protein_coding | is_pseudo=false	0.00013	0	0	0.00025	-1.1	-0.2878	1	0.521781	0.301118	3	X	X	6
PF3D7_0819600	| transcript=PF3D7_0819600.1 | gene=PF3D7_0819600 | organism=Plasmodium_falciparum_3D7 | gene_product=conserved Plasmodium protein, unknown function | transcript_product=conserved Plasmodium protein, unknown function | location=Pf3D7_08_v3:885198-886136(-) | protein_length=277 | sequence_SO=chromosome | SO=protein_coding | is_pseudo=false	0	9e-05	0	0.00095	-1.2	-0.2912	1	0.521783	0.301116	X	2	X	17
PF3D7_0930300	| transcript=PF3D7_0930300.1 | gene=PF3D7_0930300 | organism=Plasmodium_falciparum_3D7 | gene_product=merozoite surface protein 1 | transcript_product=merozoite surface protein 1 | location=Pf3D7_09_v3:1201812-1206974(+) | protein_length=1720 | sequence_SO=chromosome | SO=protein_coding | is_pseudo=false	0.00055	0.00037	0.00034	0.00085	-0.2	-0.2986	1	0.523241	0.298408	59	54	32	94
PF3D7_1419700	| transcript=PF3D7_1419700.1 | gene=PF3D7_1419700 | organism=Plasmodium_falciparum_3D7 | gene_product=conserved Plasmodium protein, unknown function | transcript_product=conserved Plasmodium protein, unknown function | location=Pf3D7_14_v3:820068-821597(+) | protein_length=509 | sequence_SO=chromosome | SO=protein_coding | is_pseudo=false	0	9e-05	0	0.00021	-1.4	-0.308	1	0.523246	0.298403	X	4	X	7
PF3D7_1466800	| transcript=PF3D7_1466800.1 | gene=PF3D7_1466800 | organism=Plasmodium_falciparum_3D7 | gene_product=conserved Plasmodium protein, unknown function | transcript_product=conserved Plasmodium protein, unknown function | location=Pf3D7_14_v3:2731986-2734694(+) | protein_length=902 | sequence_SO=chromosome | SO=protein_coding | is_pseudo=false	4e-05	0	0	3e-05	-1.4	-0.3159	1	0.524686	0.295699	2	X	X	2
PF3D7_1228600	| transcript=PF3D7_1228600.1 | gene=PF3D7_1228600 | organism=Plasmodium_falciparum_3D7 | gene_product=merozoite surface protein 9 | transcript_product=merozoite surface protein 9 | location=Pf3D7_12_v3:1160729-1162960(-) | protein_length=743 | sequence_SO=chromosome | SO=protein_coding | is_pseudo=false	7e-05	0	0	8e-05	-1.4	-0.3174	1	0.524687	0.295698	3	X	X	4
PF3D7_1343000	| transcript=PF3D7_1343000.1 | gene=PF3D7_1343000 | organism=Plasmodium_falciparum_3D7 | gene_product=phosphoethanolamine N-methyltransferase | transcript_product=phosphoethanolamine N-methyltransferase | location=Pf3D7_13_v3:1696894-1698113(+) | protein_length=266 | sequence_SO=chromosome | SO=protein_coding | is_pseudo=false	0	0.00027	0	0.00023	-1.4	-0.3413	1	0.52752	0.290305	X	6	X	4
PF3D7_0102200	| transcript=PF3D7_0102200.1 | gene=PF3D7_0102200 | organism=Plasmodium_falciparum_3D7 | gene_product=ring-infected erythrocyte surface antigen | transcript_product=ring-infected erythrocyte surface antigen | location=Pf3D7_01_v3:98819-102282(+) | protein_length=1085 | sequence_SO=chromosome | SO=protein_coding | is_pseudo=false	0.00013	0.00023	0.00013	0.00036	-0.2	-0.342	1	0.527521	0.290305	9	21	8	25
PF3D7_0612900	| transcript=PF3D7_0612900.1 | gene=PF3D7_0612900 | organism=Plasmodium_falciparum_3D7 | gene_product=nucleolar GTP-binding protein 1, putative | transcript_product=nucleolar GTP-binding protein 1, putative | location=Pf3D7_06_v3:531126-533186(+) | protein_length=686 | sequence_SO=chromosome | SO=protein_coding | is_pseudo=false	5e-05	0	0	9e-05	-1.2	-0.3498	1	0.527526	0.290301	2	X	X	4
PF3D7_0821700	| transcript=PF3D7_0821700.1 | gene=PF3D7_0821700 | organism=Plasmodium_falciparum_3D7 | gene_product=60S ribosomal protein L22, putative | transcript_product=60S ribosomal protein L22, putative | location=Pf3D7_08_v3:973586-974267(+) | protein_length=139 | sequence_SO=chromosome | SO=protein_coding | is_pseudo=false	0.00058	0.00051	0.00065	0.00056	-0.1	-0.3546	1	0.528912	0.287618	5	6	5	5
PF3D7_1237700	| transcript=PF3D7_1237700.1 | gene=PF3D7_1237700 | organism=Plasmodium_falciparum_3D7 | gene_product=conserved protein, unknown function | transcript_product=conserved protein, unknown function | location=Pf3D7_12_v3:1572371-1573557(+) | protein_length=210 | sequence_SO=chromosome | SO=protein_coding | is_pseudo=false	0.00038	0.00028	0.00017	0.00141	-0.3	-0.3563	1	0.528912	0.287616	5	5	2	19
PF3D7_0813900	| transcript=PF3D7_0813900.1 | gene=PF3D7_0813900 | organism=Plasmodium_falciparum_3D7 | gene_product=40S ribosomal protein S16, putative | transcript_product=40S ribosomal protein S16, putative | location=Pf3D7_08_v3:677989-678725(-) | protein_length=144 | sequence_SO=chromosome | SO=protein_coding | is_pseudo=false	0	0.00017	0.00025	0	-1.6	-0.3607	1	0.528915	0.287614	X	2	2	X
PF3D7_1464700	| transcript=PF3D7_1464700.1 | gene=PF3D7_1464700 | organism=Plasmodium_falciparum_3D7 | gene_product=ATP synthase (C/AC39) subunit, putative | transcript_product=ATP synthase (C/AC39) subunit, putative | location=Pf3D7_14_v3:2625452-2626600(-) | protein_length=382 | sequence_SO=chromosome | SO=protein_coding | is_pseudo=false	0.00021	0.00025	0.00014	0.00061	-0.3	-0.3653	1	0.530285	0.28494	5	8	3	15
PF3D7_1407800	| transcript=PF3D7_1407800.1 | gene=PF3D7_1407800 | organism=Plasmodium_falciparum_3D7 | gene_product=plasmepsin IV | transcript_product=plasmepsin IV | location=Pf3D7_14_v3:283086-284435(+) | protein_length=449 | sequence_SO=chromosome | SO=protein_coding | is_pseudo=false	0.00054	0.0004	0.00053	0.00055	-0.1	-0.3715	1	0.530287	0.284934	15	15	13	16
PF3D7_1120100	| transcript=PF3D7_1120100.1 | gene=PF3D7_1120100 | organism=Plasmodium_falciparum_3D7 | gene_product=phosphoglycerate mutase, putative | transcript_product=phosphoglycerate mutase, putative | location=Pf3D7_11_v3:761695-762818(+) | protein_length=250 | sequence_SO=chromosome | SO=protein_coding | is_pseudo=false	0	0.00081	0	0.00019	-1.4	-0.3757	1	0.53029	0.284933	X	17	X	3
PF3D7_1013300	| transcript=PF3D7_1013300.1 | gene=PF3D7_1013300 | organism=Plasmodium_falciparum_3D7 | gene_product=conserved Plasmodium protein, unknown function | transcript_product=conserved Plasmodium protein, unknown function | location=Pf3D7_10_v3:515721-517607(-) | protein_length=628 | sequence_SO=chromosome | SO=protein_coding | is_pseudo=false	0	8e-05	0	0.00012	-1.6	-0.3918	1	0.53298	0.279601	X	4	X	5
PF3D7_0528200	| transcript=PF3D7_0528200.1 | gene=PF3D7_0528200 | organism=Plasmodium_falciparum_3D7 | gene_product=eukaryotic translation initiation factor 3 subunit E, putative | transcript_product=eukaryotic translation initiation factor 3 subunit E, putative | location=Pf3D7_05_v3:1163408-1165072(-) | protein_length=517 | sequence_SO=chromosome | SO=protein_coding | is_pseudo=false	0.00041	0.00037	0.00035	0.00057	-0.2	-0.4058	1	0.534301	0.276941	13	16	10	19
PF3D7_1016300	| transcript=PF3D7_1016300.1 | gene=PF3D7_1016300 | organism=Plasmodium_falciparum_3D7 | gene_product=GBP130 protein | transcript_product=GBP130 protein | location=Pf3D7_10_v3:650898-653567(-) | protein_length=824 | sequence_SO=chromosome | SO=protein_coding | is_pseudo=false	0	3e-05	0	0.00026	-1.9	-0.4194	1	0.535605	0.27429	X	2	X	14
PF3D7_0824800	| transcript=PF3D7_0824800.1 | gene=PF3D7_0824800 | organism=Plasmodium_falciparum_3D7 | gene_product=conserved Plasmodium membrane protein, unknown function | transcript_product=conserved Plasmodium membrane protein, unknown function | location=Pf3D7_08_v3:1075800-1079630(+) | protein_length=1276 | sequence_SO=chromosome | SO=protein_coding | is_pseudo=false	3e-05	2e-05	3e-05	2e-05	-0.2	-0.5107	1	0.543062	0.258546	2	2	2	2
PF3D7_0628300	| transcript=PF3D7_0628300.1 | gene=PF3D7_0628300 | organism=Plasmodium_falciparum_3D7 | gene_product=choline/ethanolaminephosphotransferase, putative | transcript_product=choline/ethanolaminephosphotransferase, putative | location=Pf3D7_06_v3:1170813-1173696(-) | protein_length=391 | sequence_SO=chromosome | SO=protein_coding | is_pseudo=false	0.00017	6e-05	9e-05	0.00052	-0.6	-0.5138	1	0.543064	0.258545	4	2	2	13
PF3D7_1444300	| transcript=PF3D7_1444300.1 | gene=PF3D7_1444300 | organism=Plasmodium_falciparum_3D7 | gene_product=1-acyl-sn-glycerol-3-phosphate acyltransferase, putative | transcript_product=1-acyl-sn-glycerol-3-phosphate acyltransferase, putative | location=Pf3D7_14_v3:1828579-1829962(+) | protein_length=292 | sequence_SO=chromosome | SO=protein_coding | is_pseudo=false	0.00017	0.00016	0.00019	0.00021	-0.2	-0.5288	1	0.545401	0.253382	3	4	3	4
PF3D7_1116400	| transcript=PF3D7_1116400.1 | gene=PF3D7_1116400 | organism=Plasmodium_falciparum_3D7 | gene_product=guanine nucleotide-exchange factor SEC12 | transcript_product=guanine nucleotide-exchange factor SEC12 | location=Pf3D7_11_v3:619893-621350(-) | protein_length=485 | sequence_SO=chromosome | SO=protein_coding | is_pseudo=false	7e-05	5e-05	7e-05	6e-05	-0.2	-0.5288	1	0.545401	0.253382	2	2	2	2
PF3D7_1341200	| transcript=PF3D7_1341200.1 | gene=PF3D7_1341200 | organism=Plasmodium_falciparum_3D7 | gene_product=60S ribosomal protein L18, putative | transcript_product=60S ribosomal protein L18, putative | location=Pf3D7_13_v3:1633860-1634530(-) | protein_length=184 | sequence_SO=chromosome | SO=protein_coding | is_pseudo=false	0.00228	0.00129	0.00227	0.00237	-0.2	-0.5501	1	0.546549	0.250801	26	20	23	28
PF3D7_1315600	| transcript=PF3D7_1315600.1 | gene=PF3D7_1315600 | organism=Plasmodium_falciparum_3D7 | gene_product=CDP-diacylglycerol--inositol 3-phosphatidyltransferase | transcript_product=CDP-diacylglycerol--inositol 3-phosphatidyltransferase | location=Pf3D7_13_v3:655207-657259(-) | protein_length=209 | sequence_SO=chromosome | SO=protein_coding | is_pseudo=false	0.00031	0	0	0.00104	-2.4	-0.5639	1	0.547677	0.248239	4	X	X	14
PF3D7_0501000	| transcript=PF3D7_0501000.1 | gene=PF3D7_0501000 | organism=Plasmodium_falciparum_3D7 | gene_product=Plasmodium exported protein, unknown function | transcript_product=Plasmodium exported protein, unknown function | location=Pf3D7_05_v3:55841-56872(+) | protein_length=260 | sequence_SO=chromosome | SO=protein_coding | is_pseudo=false	0.00205	0.00027	0.00063	0.00293	-0.6	-0.5662	1	0.547679	0.248238	33	6	9	49
PF3D7_0520000	| transcript=PF3D7_0520000.1 | gene=PF3D7_0520000 | organism=Plasmodium_falciparum_3D7 | gene_product=40S ribosomal protein S9, putative | transcript_product=40S ribosomal protein S9, putative | location=Pf3D7_05_v3:828953-829883(+) | protein_length=189 | sequence_SO=chromosome | SO=protein_coding | is_pseudo=false	0.00051	0.0005	0.00058	0.00066	-0.2	-0.5734	1	0.548786	0.24569	6	8	6	8
PF3D7_0922200	| transcript=PF3D7_0922200.1 | gene=PF3D7_0922200 | organism=Plasmodium_falciparum_3D7 | gene_product=S-adenosylmethionine synthetase | transcript_product=S-adenosylmethionine synthetase | location=Pf3D7_09_v3:903362-904570(+) | protein_length=402 | sequence_SO=chromosome | SO=protein_coding | is_pseudo=false	0.00032	0.00092	0.00072	0.00085	-0.4	-0.5796	1	0.548789	0.245686	8	31	16	22
PF3D7_1473700	| transcript=PF3D7_1473700.1 | gene=PF3D7_1473700 | organism=Plasmodium_falciparum_3D7 | gene_product=nucleoporin NUP116/NSP116, putative | transcript_product=nucleoporin NUP116/NSP116, putative | location=Pf3D7_14_v3:2998594-3002355(-) | protein_length=1253 | sequence_SO=chromosome | SO=protein_coding | is_pseudo=false	4e-05	0	0	4e-05	-2.2	-0.596	1	0.549885	0.243143	3	X	X	3
PF3D7_1472300	| transcript=PF3D7_1472300.1 | gene=PF3D7_1472300 | organism=Plasmodium_falciparum_3D7 | gene_product=conserved protein, unknown function | transcript_product=conserved protein, unknown function | location=Pf3D7_14_v3:2954108-2957108(+) | protein_length=535 | sequence_SO=chromosome | SO=protein_coding | is_pseudo=false	0.00012	0.00022	0.00017	0.00035	-0.4	-0.609	1	0.550959	0.240612	4	10	5	12
PF3D7_1411100	0 genes:. 2 proteins in this group did not match any genes. PF3D7_1411100:| transcript=PF3D7_1411100.1 | gene=PF3D7_1411100 | organism=Plasmodium_falciparum_3D7 | gene_product=conserved Plasmodium membrane protein, unknown function, unspecified product | transcript_product=conserved Plasmodium membrane protein, unknown function | location=Pf3D7_14_v3:447923-449968(-) | protein_length=373 | sequen…	9e-05	6e-05	0.0001	8e-05	-0.2	-0.6134	1	0.552011	0.238098	2	2	2	2
PF3D7_1219100	| transcript=PF3D7_1219100.1 | gene=PF3D7_1219100 | organism=Plasmodium_falciparum_3D7 | gene_product=clathrin heavy chain, putative | transcript_product=clathrin heavy chain, putative | location=Pf3D7_12_v3:757649-763642(+) | protein_length=1997 | sequence_SO=chromosome | SO=protein_coding | is_pseudo=false	0.00081	0.00054	0.00061	0.00238	-0.5	-0.6213	1	0.552016	0.238091	100	91	67	305
PF3D7_1353200	| transcript=PF3D7_1353200.1 | gene=PF3D7_1353200 | organism=Plasmodium_falciparum_3D7 | gene_product=membrane associated histidine-rich protein 2 | transcript_product=membrane associated histidine-rich protein 2 | location=Pf3D7_13_v3:2130531-2131065(+) | protein_length=137 | sequence_SO=chromosome | SO=protein_coding | is_pseudo=false	0.00059	0.00026	0.00027	0.0017	-0.6	-0.6234	1	0.552018	0.238091	5	3	2	15
PF3D7_0523000	| transcript=PF3D7_0523000.1 | gene=PF3D7_0523000 | organism=Plasmodium_falciparum_3D7 | gene_product=multidrug resistance protein 1 | transcript_product=multidrug resistance protein 1 | location=Pf3D7_05_v3:957890-962149(+) | protein_length=1419 | sequence_SO=chromosome | SO=protein_coding | is_pseudo=false	0.00308	0.00538	0.00411	0.0077	-0.3	-0.6375	1	0.554075	0.233094	271	642	321	702
PF3D7_1145400	| transcript=PF3D7_1145400.1 | gene=PF3D7_1145400 | organism=Plasmodium_falciparum_3D7 | gene_product=dynamin-like protein | transcript_product=dynamin-like protein | location=Pf3D7_11_v3:1800544-1803550(-) | protein_length=837 | sequence_SO=chromosome | SO=protein_coding | is_pseudo=false	6e-05	7e-05	7e-05	9e-05	-0.2	-0.6629	1	0.555086	0.230595	3	5	3	5
PF3D7_1211800	| transcript=PF3D7_1211800.1 | gene=PF3D7_1211800 | organism=Plasmodium_falciparum_3D7 | gene_product=polyubiquitin | transcript_product=polyubiquitin | location=Pf3D7_12_v3:526109-527780(+) | protein_length=381 | sequence_SO=chromosome | SO=protein_coding | is_pseudo=false	0.00034	5e-05	0.00014	0.00057	-0.8	-0.6683	1	0.556069	0.228125	8	1.5	3	14
PF3D7_1424400	| transcript=PF3D7_1424400.1 | gene=PF3D7_1424400 | organism=Plasmodium_falciparum_3D7 | gene_product=60S ribosomal protein L7-3, putative | transcript_product=60S ribosomal protein L7-3, putative | location=Pf3D7_14_v3:977908-979166(+) | protein_length=283 | sequence_SO=chromosome | SO=protein_coding | is_pseudo=false	0.002	0.00063	0.00148	0.00192	-0.4	-0.6824	1	0.557041	0.22566	35	15	23	35
PF3D7_1129000	| transcript=PF3D7_1129000.1 | gene=PF3D7_1129000 | organism=Plasmodium_falciparum_3D7 | gene_product=spermidine synthase | transcript_product=spermidine synthase | location=Pf3D7_11_v3:1121930-1123377(+) | protein_length=321 | sequence_SO=chromosome | SO=protein_coding | is_pseudo=false	0.0003	0.00041	0.00034	0.00082	-0.5	-0.6856	1	0.557042	0.225656	6	11	6	17
PF3D7_1358800	| transcript=PF3D7_1358800.1 | gene=PF3D7_1358800 | organism=Plasmodium_falciparum_3D7 | gene_product=40S ribosomal protein S15 | transcript_product=40S ribosomal protein S15 | location=Pf3D7_13_v3:2331074-2331529(+) | protein_length=151 | sequence_SO=chromosome | SO=protein_coding | is_pseudo=false	0.00246	0.00024	0.0012	0.0034	-1	-0.7354	1	0.560753	0.215923	23	3	10	33
PF3D7_1012900	| transcript=PF3D7_1012900.1 | gene=PF3D7_1012900 | organism=Plasmodium_falciparum_3D7 | gene_product=autophagy-related protein 18 | transcript_product=autophagy-related protein 18 | location=Pf3D7_10_v3:496331-497573(-) | protein_length=380 | sequence_SO=chromosome | SO=protein_coding | is_pseudo=false	0.00208	0.00204	0.00196	0.00418	-0.3	-0.7437	1	0.560757	0.215915	49	65	41	102
PF3D7_0412000	| transcript=PF3D7_0412000.1 | gene=PF3D7_0412000 | organism=Plasmodium_falciparum_3D7 | gene_product=LITAF-like zinc finger protein, putative | transcript_product=LITAF-like zinc finger protein, putative | location=Pf3D7_04_v3:536774-539110(+) | protein_length=778 | sequence_SO=chromosome | SO=protein_coding | is_pseudo=false	6e-05	3e-05	5e-05	0.00014	-0.6	-0.7516	1	0.561639	0.213516	3	2	2	7
PF3D7_1346100	| transcript=PF3D7_1346100.1 | gene=PF3D7_1346100 | organism=Plasmodium_falciparum_3D7 | gene_product=protein transport protein SEC61 subunit alpha | transcript_product=protein transport protein SEC61 subunit alpha | location=Pf3D7_13_v3:1843376-1844897(+) | protein_length=472 | sequence_SO=chromosome | SO=protein_coding | is_pseudo=false	0.00079	0.00025	0.00065	0.00073	-0.4	-0.7646	1	0.562507	0.211125	23	10	17	22
PF3D7_1344800	| transcript=PF3D7_1344800.1 | gene=PF3D7_1344800 | organism=Plasmodium_falciparum_3D7 | gene_product=aspartate carbamoyltransferase | transcript_product=aspartate carbamoyltransferase | location=Pf3D7_13_v3:1796274-1797709(+) | protein_length=375 | sequence_SO=chromosome | SO=protein_coding | is_pseudo=false	0.00034	6e-05	0.00015	0.00071	-0.7	-0.7939	1	0.564194	0.206379	8	2	3	17
PF3D7_1105600	| transcript=PF3D7_1105600.1 | gene=PF3D7_1105600 | organism=Plasmodium_falciparum_3D7 | gene_product=translocon component PTEX88 | transcript_product=translocon component PTEX88 | location=Pf3D7_11_v3:241184-243517(-) | protein_length=777 | sequence_SO=chromosome | SO=protein_coding | is_pseudo=false	0.00046	0.00014	0.00042	0.00056	-0.6	-0.8005	1	0.564199	0.206375	22	9	18	28
PF3D7_1130200	| transcript=PF3D7_1130200.1 | gene=PF3D7_1130200 | organism=Plasmodium_falciparum_3D7 | gene_product=60S ribosomal protein P0 | transcript_product=60S ribosomal protein P0 | location=Pf3D7_11_v3:1165221-1166171(+) | protein_length=316 | sequence_SO=chromosome | SO=protein_coding | is_pseudo=false	0.00051	0.00034	0.0008	0.00044	-0.3	-0.8029	1	0.565011	0.204033	10	9	14	9
PF3D7_1435500	| transcript=PF3D7_1435500.1 | gene=PF3D7_1435500 | organism=Plasmodium_falciparum_3D7 | gene_product=clathrin light chain, putative | transcript_product=clathrin light chain, putative | location=Pf3D7_14_v3:1436280-1437044(+) | protein_length=254 | sequence_SO=chromosome | SO=protein_coding | is_pseudo=false	0.00013	0.00023	0.00021	0.00025	-0.3	-0.8189	1	0.565813	0.20169	2	5	3	4
PF3D7_1229100	| transcript=PF3D7_1229100.1 | gene=PF3D7_1229100 | organism=Plasmodium_falciparum_3D7 | gene_product=multidrug resistance-associated protein 2 | transcript_product=multidrug resistance-associated protein 2 | location=Pf3D7_12_v3:1192888-1199214(-) | protein_length=2108 | sequence_SO=chromosome | SO=protein_coding | is_pseudo=false	4e-05	5e-05	4e-05	0.00018	-0.6	-0.8747	1	0.568852	0.192465	5	9	5	24
PF3D7_0517300	| transcript=PF3D7_0517300.1 | gene=PF3D7_0517300 | organism=Plasmodium_falciparum_3D7 | gene_product=serine/arginine-rich splicing factor 1 | transcript_product=serine/arginine-rich splicing factor 1 | location=Pf3D7_05_v3:724681-725751(-) | protein_length=298 | sequence_SO=chromosome | SO=protein_coding | is_pseudo=false	0.00217	8e-05	0.00097	0.00146	-1.1	-0.9005	1	0.570273	0.187939	40	2	16	28
PF3D7_1431700	| transcript=PF3D7_1431700.1 | gene=PF3D7_1431700 | organism=Plasmodium_falciparum_3D7 | gene_product=60S ribosomal protein L14, putative | transcript_product=60S ribosomal protein L14, putative | location=Pf3D7_14_v3:1247030-1247950(+) | protein_length=165 | sequence_SO=chromosome | SO=protein_coding | is_pseudo=false	0.00059	0.0005	0.00066	0.00104	-0.4	-0.9724	0.983594	0.573546	0.176862	6	7	6	11
PF3D7_0320900	| transcript=PF3D7_0320900.1 | gene=PF3D7_0320900 | organism=Plasmodium_falciparum_3D7 | gene_product=histone H2A.Z | transcript_product=histone H2A.Z | location=Pf3D7_03_v3:875213-876295(+) | protein_length=158 | sequence_SO=chromosome | SO=protein_coding | is_pseudo=false	0.00417	0.0018	0.00616	0.00389	-0.5	-0.994	0.969401	0.574742	0.172543	40.8	24	53.6	39.5
PF3D7_1475600	| transcript=PF3D7_1475600.1 | gene=PF3D7_1475600 | organism=Plasmodium_falciparum_3D7 | gene_product=bromodomain protein, putative | transcript_product=bromodomain protein, putative | location=Pf3D7_14_v3:3112509-3114698(-) | protein_length=729 | sequence_SO=chromosome | SO=protein_coding | is_pseudo=false	0.00011	3e-05	0.00012	0.00011	-0.6	-1.0077	0.960403	0.575318	0.170402	5	2	5	5
PF3D7_0112200	| transcript=PF3D7_0112200.1 | gene=PF3D7_0112200 | organism=Plasmodium_falciparum_3D7 | gene_product=multidrug resistance-associated protein 1 | transcript_product=multidrug resistance-associated protein 1 | location=Pf3D7_01_v3:464726-470194(+) | protein_length=1822 | sequence_SO=chromosome | SO=protein_coding | is_pseudo=false	9e-05	5e-05	7e-05	0.00026	-0.7	-1.0323	0.944259	0.575883	0.168264	10	8	7	30
PF3D7_1358700	| transcript=PF3D7_1358700.1 | gene=PF3D7_1358700 | organism=Plasmodium_falciparum_3D7 | gene_product=YOP1-like protein, putative | transcript_product=YOP1-like protein, putative | location=Pf3D7_13_v3:2326394-2326855(-) | protein_length=153 | sequence_SO=chromosome | SO=protein_coding | is_pseudo=false	0.00021	0.00016	0.00036	0.0002	-0.4	-1.0722	0.918128	0.577471	0.161976	2	2	3	2
PF3D7_0501200	| transcript=PF3D7_0501200.1 | gene=PF3D7_0501200 | organism=Plasmodium_falciparum_3D7 | gene_product=parasite-infected erythrocyte surface protein | transcript_product=parasite-infected erythrocyte surface protein | location=Pf3D7_05_v3:64065-65489(+) | protein_length=408 | sequence_SO=chromosome | SO=protein_coding | is_pseudo=false	0.00218	0.0012	0.0024	0.00355	-0.6	-1.089	0.907151	0.57845	0.157873	55	41	54	93
PF3D7_0807300	| transcript=PF3D7_0807300.1 | gene=PF3D7_0807300 | organism=Plasmodium_falciparum_3D7 | gene_product=ras-related protein Rab-18 | transcript_product=ras-related protein Rab-18 | location=Pf3D7_08_v3:381564-382847(+) | protein_length=201 | sequence_SO=chromosome | SO=protein_coding | is_pseudo=false	0.00032	0.00018	0.00036	0.00039	-0.5	-1.1142	0.890725	0.578925	0.155826	4	3	4	5
PF3D7_0424600	| transcript=PF3D7_0424600.1 | gene=PF3D7_0424600 | organism=Plasmodium_falciparum_3D7 | gene_product=Plasmodium exported protein (PHISTb), unknown function | transcript_product=Plasmodium exported protein (PHISTb), unknown function | location=Pf3D7_04_v3:1113345-1114486(-) | protein_length=309 | sequence_SO=chromosome | SO=protein_coding | is_pseudo=false	0.00063	0.00058	0.00071	0.00257	-0.8	-1.2017	0.834146	0.581802	0.142027	12	15	12	51
PF3D7_1127000	| transcript=PF3D7_1127000.1 | gene=PF3D7_1127000 | organism=Plasmodium_falciparum_3D7 | gene_product=protein phosphatase, putative | transcript_product=protein phosphatase, putative | location=Pf3D7_11_v3:1056198-1058054(-) | protein_length=287 | sequence_SO=chromosome | SO=protein_coding | is_pseudo=false	0.00208	0.00129	0.00202	0.00369	-0.5	-1.2027	0.833504	0.581802	0.142025	37	31	32	68
PF3D7_1334500	| transcript=PF3D7_1334500.1 | gene=PF3D7_1334500 | organism=Plasmodium_falciparum_3D7 | gene_product=MSP7-like protein | transcript_product=MSP7-like protein | location=Pf3D7_13_v3:1405731-1407512(-) | protein_length=593 | sequence_SO=chromosome | SO=protein_coding | is_pseudo=false	0.00014	4e-05	0.00015	0.00047	-1.2	-1.2166	0.824598	0.582158	0.140116	5	2	5	18
PF3D7_0401800	| transcript=PF3D7_0401800.1 | gene=PF3D7_0401800 | organism=Plasmodium_falciparum_3D7 | gene_product=Plasmodium exported protein (PHISTb), unknown function | transcript_product=Plasmodium exported protein (PHISTb), unknown function | location=Pf3D7_04_v3:103742-105603(-) | protein_length=560 | sequence_SO=chromosome | SO=protein_coding | is_pseudo=false	0.00017	0.00026	0.00026	0.00206	-1.2	-1.2498	0.803431	0.58283	0.136341	6	12	8	74
PF3D7_1358100	| transcript=PF3D7_1358100.1 | gene=PF3D7_1358100 | organism=Plasmodium_falciparum_3D7 | gene_product=Sas10 domain-containing protein, putative | transcript_product=Sas10 domain-containing protein, putative | location=Pf3D7_13_v3:2305436-2307640(-) | protein_length=734 | sequence_SO=chromosome | SO=protein_coding | is_pseudo=false	0.00048	5e-05	0.00037	0.00095	-1.3	-1.2552	0.800003	0.58314	0.134488	22	3	15	45
PF3D7_1342000	| transcript=PF3D7_1342000.1 | gene=PF3D7_1342000 | organism=Plasmodium_falciparum_3D7 | gene_product=40S ribosomal protein S6 | transcript_product=40S ribosomal protein S6 | location=Pf3D7_13_v3:1653211-1654131(-) | protein_length=306 | sequence_SO=chromosome | SO=protein_coding | is_pseudo=false	0.00026	0.00016	0.0003	0.00036	-0.5	-1.2883	0.77909	0.58373	0.130807	5	4	5	7
PF3D7_0532100	| transcript=PF3D7_0532100.1 | gene=PF3D7_0532100 | organism=Plasmodium_falciparum_3D7 | gene_product=early transcribed membrane protein 5 | transcript_product=early transcribed membrane protein 5 | location=Pf3D7_05_v3:1301224-1301769(+) | protein_length=181 | sequence_SO=chromosome | SO=protein_coding | is_pseudo=false	0.00036	0.00013	0.0004	0.0006	-0.8	-1.2998	0.771866	0.584003	0.128996	4	2	4	7
PF3D7_0709000	| transcript=PF3D7_0709000.1 | gene=PF3D7_0709000 | organism=Plasmodium_falciparum_3D7 | gene_product=chloroquine resistance transporter | transcript_product=chloroquine resistance transporter | location=Pf3D7_07_v3:403222-406317(+) | protein_length=424 | sequence_SO=chromosome | SO=protein_coding | is_pseudo=false	0.00034	0.00022	0.00039	0.00062	-0.6	-1.3449	0.743754	0.58475	0.123651	9	8	9	17
PF3D7_1471100	| transcript=PF3D7_1471100.1 | gene=PF3D7_1471100 | organism=Plasmodium_falciparum_3D7 | gene_product=exported protein 2 | transcript_product=exported protein 2 | location=Pf3D7_14_v3:2905163-2906565(-) | protein_length=287 | sequence_SO=chromosome | SO=protein_coding | is_pseudo=false	0.02313	0.01024	0.02777	0.04484	-0.8	-1.3962	0.712242	0.585564	0.116756	411	247	439	827
PF3D7_1105800	| transcript=PF3D7_1105800.1 | gene=PF3D7_1105800 | organism=Plasmodium_falciparum_3D7 | gene_product=conserved Apicomplexan protein, unknown function | transcript_product=conserved Apicomplexan protein, unknown function | location=Pf3D7_11_v3:250918-252872(+) | protein_length=266 | sequence_SO=chromosome | SO=protein_coding | is_pseudo=false	0.00042	0.00031	0.00048	0.00099	-0.6	-1.3985	0.710841	0.585565	0.116754	7	7	7	17
PF3D7_0103200	| transcript=PF3D7_0103200.1 | gene=PF3D7_0103200 | organism=Plasmodium_falciparum_3D7 | gene_product=nucleoside transporter 4 | transcript_product=nucleoside transporter 4 | location=Pf3D7_01_v3:140662-142219(-) | protein_length=434 | sequence_SO=chromosome | SO=protein_coding | is_pseudo=false	0.00015	0.00014	0.00021	0.00022	-0.4	-1.3999	0.709989	0.585566	0.116754	4	5	5	6
PF3D7_0500800	| transcript=PF3D7_0500800.1 | gene=PF3D7_0500800 | organism=Plasmodium_falciparum_3D7 | gene_product=mature parasite-infected erythrocyte surface antigen | transcript_product=mature parasite-infected erythrocyte surface antigen | location=Pf3D7_05_v3:43327-47761(-) | protein_length=1434 | sequence_SO=chromosome | SO=protein_coding | is_pseudo=false	0.00098	0.00075	0.0012	0.00305	-0.8	-1.4146	0.701069	0.58574	0.115069	87	90	95	281
PF3D7_1456800	| transcript=PF3D7_1456800.1 | gene=PF3D7_1456800 | organism=Plasmodium_falciparum_3D7 | gene_product=V-type H(+)-translocating pyrophosphatase, putative | transcript_product=V-type H(+)-translocating pyrophosphatase, putative | location=Pf3D7_14_v3:2329933-2332086(-) | protein_length=717 | sequence_SO=chromosome | SO=protein_coding | is_pseudo=false	0.00097	0.0009	0.00124	0.00332	-0.7	-1.4209	0.69726	0.585898	0.113408	43	54	49	153
PF3D7_0519200	| transcript=PF3D7_0519200.1 | gene=PF3D7_0519200 | organism=Plasmodium_falciparum_3D7 | gene_product=V-type proton ATPase 16 kDa proteolipid subunit | transcript_product=V-type proton ATPase 16 kDa proteolipid subunit | location=Pf3D7_05_v3:791719-792936(-) | protein_length=165 | sequence_SO=chromosome | SO=protein_coding | is_pseudo=false	0.00509	0.00779	0.00979	0.01405	-0.6	-1.4472	0.681452	0.586184	0.110122	52	108	89	149
PF3D7_1456500	| transcript=PF3D7_1456500.1 | gene=PF3D7_1456500 | organism=Plasmodium_falciparum_3D7 | gene_product=conserved Plasmodium protein, unknown function | transcript_product=conserved Plasmodium protein, unknown function | location=Pf3D7_14_v3:2314380-2321555(+) | protein_length=2391 | sequence_SO=chromosome | SO=protein_coding | is_pseudo=false	0	0	0	1e-05	-5.4	-1.4914	0.655237	0.586529	0.105309	X	X	X	2
PF3D7_1116800	| transcript=PF3D7_1116800.1 | gene=PF3D7_1116800 | organism=Plasmodium_falciparum_3D7 | gene_product=heat shock protein 101 | transcript_product=heat shock protein 101 | location=Pf3D7_11_v3:636094-639511(-) | protein_length=906 | sequence_SO=chromosome | SO=protein_coding | is_pseudo=false	0.00217	0.00217	0.00279	0.00891	-0.8	-1.4927	0.654473	0.586529	0.105308	122	165	139	519
PF3D7_0617000	| transcript=PF3D7_0617000.1 | gene=PF3D7_0617000 | organism=Plasmodium_falciparum_3D7 | gene_product=mitochondrial import receptor subunit TOM40, putative | transcript_product=mitochondrial import receptor subunit TOM40, putative | location=Pf3D7_06_v3:704035-705168(-) | protein_length=377 | sequence_SO=chromosome | SO=protein_coding | is_pseudo=false	9e-05	0	0.0001	0.00012	-6.5	-1.4957	0.652711	0.586531	0.105306	2	X	2	3
PF3D7_0713700	| transcript=PF3D7_0713700.1 | gene=PF3D7_0713700 | organism=Plasmodium_falciparum_3D7 | gene_product=conserved Plasmodium protein, unknown function | transcript_product=conserved Plasmodium protein, unknown function | location=Pf3D7_07_v3:621463-623521(-) | protein_length=209 | sequence_SO=chromosome | SO=protein_coding | is_pseudo=false	0.00108	0.00131	0.00174	0.00283	-0.6	-1.5175	0.639974	0.586701	0.102185	14	23	20	38
PF3D7_1037300	| transcript=PF3D7_1037300.1 | gene=PF3D7_1037300 | organism=Plasmodium_falciparum_3D7 | gene_product=ADP/ATP transporter on adenylate translocase | transcript_product=ADP/ATP transporter on adenylate translocase | location=Pf3D7_10_v3:1477940-1478845(-) | protein_length=301 | sequence_SO=chromosome | SO=protein_coding | is_pseudo=false	0.00064	0.00059	0.00084	0.0015	-0.6	-1.5323	0.631394	0.586771	0.100645	12	15	14	29
PF3D7_1367500	| transcript=PF3D7_1367500.1 | gene=PF3D7_1367500 | organism=Plasmodium_falciparum_3D7 | gene_product=NADH-cytochrome b5 reductase, putative | transcript_product=NADH-cytochrome b5 reductase, putative | location=Pf3D7_13_v3:2692076-2693282(+) | protein_length=362 | sequence_SO=chromosome | SO=protein_coding | is_pseudo=false	0	0	0	0.00013	-8.3	-1.5607	0.615082	0.586878	0.097614	X	X	X	3
PF3D7_0113000	| transcript=PF3D7_0113000.1 | gene=PF3D7_0113000 | organism=Plasmodium_falciparum_3D7 | gene_product=glutamic acid-rich protein | transcript_product=glutamic acid-rich protein | location=Pf3D7_01_v3:487892-490127(-) | protein_length=673 | sequence_SO=chromosome | SO=protein_coding | is_pseudo=false	0	0	0	9e-05	-6.7	-1.6255	0.578652	0.586962	0.090323	X	X	X	4
PF3D7_0801000	| transcript=PF3D7_0801000.1 | gene=PF3D7_0801000 | organism=Plasmodium_falciparum_3D7 | gene_product=Plasmodium exported protein (PHISTc), unknown function | transcript_product=Plasmodium exported protein (PHISTc), unknown function | location=Pf3D7_08_v3:84568-88422(-) | protein_length=1219 | sequence_SO=chromosome | SO=protein_coding | is_pseudo=false	7e-05	5e-05	9e-05	0.00033	-1.1	-1.6264	0.578154	0.586962	0.090322	5	5	6	26
PF3D7_0601900	| transcript=PF3D7_0601900.1 | gene=PF3D7_0601900 | organism=Plasmodium_falciparum_3D7 | gene_product=conserved Plasmodium protein, unknown function | transcript_product=conserved Plasmodium protein, unknown function | location=Pf3D7_06_v3:78190-78784(+) | protein_length=128 | sequence_SO=chromosome | SO=protein_coding | is_pseudo=false	0	0	0	0.00097	-8.6	-1.6448	0.568021	0.586951	0.088906	X	X	X	8
PF3D7_1421000	| transcript=PF3D7_1421000.1 | gene=PF3D7_1421000 | organism=Plasmodium_falciparum_3D7 | gene_product=DIX domain-containing protein, putative | transcript_product=DIX domain-containing protein, putative | location=Pf3D7_14_v3:867802-868920(-) | protein_length=177 | sequence_SO=chromosome | SO=protein_coding | is_pseudo=false	0	0	0	0.00044	-7.5	-1.6706	0.553972	0.586894	0.08613	X	X	X	5
PF3D7_0822600	| transcript=PF3D7_0822600.1 | gene=PF3D7_0822600 | organism=Plasmodium_falciparum_3D7 | gene_product=protein transport protein SEC23 | transcript_product=protein transport protein SEC23 | location=Pf3D7_08_v3:997055-999529(+) | protein_length=759 | sequence_SO=chromosome | SO=protein_coding | is_pseudo=false	4e-05	0	5e-05	6e-05	-6.7	-1.7155	0.529974	0.586741	0.08208	2	X	2	3
PF3D7_0601200	| transcript=PF3D7_0601200.1 | gene=PF3D7_0601200 | organism=Plasmodium_falciparum_3D7 | gene_product=Pfmc-2TM Maurer's cleft two transmembrane protein | transcript_product=Pfmc-2TM Maurer's cleft two transmembrane protein | location=Pf3D7_06_v3:47463-48261(+) | protein_length=234 | sequence_SO=chromosome | SO=protein_coding | is_pseudo=false	0.00028	0.0001	0.00074	0.00207	-2	-1.744	0.515045	0.586593	0.079459	4	2	9.6	31.1
PF3D7_0406100	| transcript=PF3D7_0406100.1 | gene=PF3D7_0406100 | organism=Plasmodium_falciparum_3D7 | gene_product=V-type proton ATPase subunit B | transcript_product=V-type proton ATPase subunit B | location=Pf3D7_04_v3:323267-325225(-) | protein_length=494 | sequence_SO=chromosome | SO=protein_coding | is_pseudo=false	0	7e-05	7e-05	9e-05	-6.7	-1.7459	0.514059	0.586501	0.078181	X	3	2	3
PF3D7_1436300	| transcript=PF3D7_1436300.1 | gene=PF3D7_1436300 | organism=Plasmodium_falciparum_3D7 | gene_product=translocon component PTEX150 | transcript_product=translocon component PTEX150 | location=Pf3D7_14_v3:1479777-1482758(+) | protein_length=993 | sequence_SO=chromosome | SO=protein_coding | is_pseudo=false	0.00046	0.00041	0.00071	0.00119	-0.7	-1.8102	0.481306	0.586067	0.073172	28	34	39	76
PF3D7_1237200	| transcript=PF3D7_1237200.1 | gene=PF3D7_1237200 | organism=Plasmodium_falciparum_3D7 | gene_product=conserved Plasmodium protein, unknown function | transcript_product=conserved Plasmodium protein, unknown function | location=Pf3D7_12_v3:1550324-1556071(+) | protein_length=1915 | sequence_SO=chromosome | SO=protein_coding | is_pseudo=false	0	0	0	2e-05	-7.2	-1.8142	0.479309	0.585934	0.071969	X	X	X	2
PF3D7_0423000	| transcript=PF3D7_0423000.1 | gene=PF3D7_0423000 | organism=Plasmodium_falciparum_3D7 | gene_product=conserved Plasmodium protein, unknown function | transcript_product=conserved Plasmodium protein, unknown function | location=Pf3D7_04_v3:1047696-1048478(+) | protein_length=260 | sequence_SO=chromosome | SO=protein_coding | is_pseudo=false	0	0	0	0.00012	-6.8	-1.8187	0.47707	0.585935	0.071963	X	X	X	2
PF3D7_0319700	| transcript=PF3D7_0319700.1 | gene=PF3D7_0319700 | organism=Plasmodium_falciparum_3D7 | gene_product=ABC transporter I family member 1, putative | transcript_product=ABC transporter I family member 1, putative | location=Pf3D7_03_v3:820708-830802(+) | protein_length=3133 | sequence_SO=chromosome | SO=protein_coding | is_pseudo=false	0	1e-05	1e-05	2e-05	-6.6	-1.8349	0.469058	0.585797	0.070763	X	2	2	4
PF3D7_0317300	| transcript=PF3D7_0317300.1 | gene=PF3D7_0317300 | organism=Plasmodium_falciparum_3D7 | gene_product=conserved Plasmodium protein, unknown function | transcript_product=conserved Plasmodium protein, unknown function | location=Pf3D7_03_v3:699544-709728(-) | protein_length=3394 | sequence_SO=chromosome | SO=protein_coding | is_pseudo=false	3e-05	0	1e-05	3e-05	-7	-1.8648	0.454485	0.585498	0.068411	7	X	2	7
PF3D7_1025300	| transcript=PF3D7_1025300.1 | gene=PF3D7_1025300 | organism=Plasmodium_falciparum_3D7 | gene_product=conserved protein, unknown function | transcript_product=conserved protein, unknown function | location=Pf3D7_10_v3:1057890-1060658(-) | protein_length=922 | sequence_SO=chromosome | SO=protein_coding | is_pseudo=false	0	0	0	8e-05	-8.2	-1.8751	0.449529	0.585335	0.06726	X	X	X	5
PF3D7_0618600	| transcript=PF3D7_0618600.1 | gene=PF3D7_0618600 | organism=Plasmodium_falciparum_3D7 | gene_product=rhomboid protease ROM10 | transcript_product=rhomboid protease ROM10 | location=Pf3D7_06_v3:775980-777835(-) | protein_length=274 | sequence_SO=chromosome | SO=protein_coding | is_pseudo=false	0	0	0	0.00102	-8.9	-1.9087	0.433594	0.584992	0.064994	X	X	X	18
PF3D7_0606800	| transcript=PF3D7_0606800.1 | gene=PF3D7_0606800 | organism=Plasmodium_falciparum_3D7 | gene_product=VFT protein | transcript_product=VFT protein | location=Pf3D7_06_v3:288377-289276(-) | protein_length=299 | sequence_SO=chromosome | SO=protein_coding | is_pseudo=false	0	0	0	0.00016	-7	-1.9113	0.432376	0.584804	0.063892	X	X	X	3
PF3D7_1312700	| transcript=PF3D7_1312700.1 | gene=PF3D7_1312700 | organism=Plasmodium_falciparum_3D7 | gene_product=conserved Plasmodium protein, unknown function | transcript_product=conserved Plasmodium protein, unknown function | location=Pf3D7_13_v3:532270-533958(-) | protein_length=562 | sequence_SO=chromosome | SO=protein_coding | is_pseudo=false	0	0	0	6e-05	-8	-1.9149	0.430693	0.584805	0.063888	X	X	X	2
PF3D7_0720700	| transcript=PF3D7_0720700.1 | gene=PF3D7_0720700 | organism=Plasmodium_falciparum_3D7 | gene_product=phosphoinositide-binding protein, putative | transcript_product=phosphoinositide-binding protein, putative | location=Pf3D7_07_v3:891683-899051(+) | protein_length=2166 | sequence_SO=chromosome | SO=protein_coding | is_pseudo=false	1e-05	3e-05	6e-05	0.00011	-1.2	-1.9352	0.421278	0.584616	0.062788	2	6	7	15
PF3D7_0501300	| transcript=PF3D7_0501300.1 | gene=PF3D7_0501300 | organism=Plasmodium_falciparum_3D7 | gene_product=skeleton-binding protein 1 | transcript_product=skeleton-binding protein 1 | location=Pf3D7_05_v3:68930-70113(+) | protein_length=337 | sequence_SO=chromosome | SO=protein_coding | is_pseudo=false	0.00115	0.00053	0.00189	0.00194	-0.9	-1.9393	0.419392	0.584415	0.061713	24	15	35	42
PF3D7_0113200	| transcript=PF3D7_0113200.1 | gene=PF3D7_0113200 | organism=Plasmodium_falciparum_3D7 | gene_product=Plasmodium exported protein, unknown function | transcript_product=Plasmodium exported protein, unknown function | location=Pf3D7_01_v3:500959-502868(-) | protein_length=592 | sequence_SO=chromosome | SO=protein_coding | is_pseudo=false	0	0	0	0.00011	-8.3	-1.9456	0.416505	0.584416	0.061708	X	X	X	4
PF3D7_1108400	| transcript=PF3D7_1108400.1 | gene=PF3D7_1108400 | organism=Plasmodium_falciparum_3D7 | gene_product=casein kinase 2, alpha subunit | transcript_product=casein kinase 2, alpha subunit | location=Pf3D7_11_v3:365093-366100(+) | protein_length=335 | sequence_SO=chromosome | SO=protein_coding | is_pseudo=false	0	0.00025	0.00011	0.00014	-7.4	-1.9474	0.415682	0.584417	0.061707	X	7	2	3
PF3D7_0817300	| transcript=PF3D7_0817300.1 | gene=PF3D7_0817300 | organism=Plasmodium_falciparum_3D7 | gene_product=conserved Plasmodium protein, unknown function | transcript_product=conserved Plasmodium protein, unknown function | location=Pf3D7_08_v3:782909-789616(-) | protein_length=2235 | sequence_SO=chromosome | SO=protein_coding | is_pseudo=false	1e-05	2e-05	2e-05	3e-05	-0.7	-1.9935	0.394967	0.583553	0.057528	2	3	3	5
PF3D7_0629500	| transcript=PF3D7_0629500.1 | gene=PF3D7_0629500 | organism=Plasmodium_falciparum_3D7 | gene_product=amino acid transporter AAT1 | transcript_product=amino acid transporter AAT1 | location=Pf3D7_06_v3:1213948-1216005(-) | protein_length=606 | sequence_SO=chromosome | SO=protein_coding | is_pseudo=false	0	4e-05	0.00012	0.00013	-8.1	-2.0186	0.383974	0.583325	0.056509	X	2	4	5
PF3D7_1308900	| transcript=PF3D7_1308900.1 | gene=PF3D7_1308900 | organism=Plasmodium_falciparum_3D7 | gene_product=mRNA-decapping enzyme 2, putative | transcript_product=mRNA-decapping enzyme 2, putative | location=Pf3D7_13_v3:408580-412101(-) | protein_length=1173 | sequence_SO=chromosome | SO=protein_coding | is_pseudo=false	3e-05	0	3e-05	3e-05	-6.9	-2.0197	0.383497	0.583083	0.055519	2	X	2	2
PF3D7_0703900	| transcript=PF3D7_0703900.1 | gene=PF3D7_0703900 | organism=Plasmodium_falciparum_3D7 | gene_product=conserved Plasmodium membrane protein, unknown function | transcript_product=conserved Plasmodium membrane protein, unknown function | location=Pf3D7_07_v3:153320-166396(-) | protein_length=4358 | sequence_SO=chromosome | SO=protein_coding | is_pseudo=false	0	0	0	1e-05	-7.6	-2.0432	0.373397	0.582841	0.054527	X	X	X	2
PF3D7_0819500	| transcript=PF3D7_0819500.1 | gene=PF3D7_0819500 | organism=Plasmodium_falciparum_3D7 | gene_product=conserved protein, unknown function | transcript_product=conserved protein, unknown function | location=Pf3D7_08_v3:881590-884390(+) | protein_length=386 | sequence_SO=chromosome | SO=protein_coding | is_pseudo=false	0	0	0	0.00032	-7.5	-2.0896	0.353974	0.581802	0.050728	X	X	X	8
PF3D7_0811200	| transcript=PF3D7_0811200.1 | gene=PF3D7_0811200 | organism=Plasmodium_falciparum_3D7 | gene_product=ER membrane protein complex subunit 1, putative | transcript_product=ER membrane protein complex subunit 1, putative | location=Pf3D7_08_v3:560744-564276(+) | protein_length=1133 | sequence_SO=chromosome | SO=protein_coding | is_pseudo=false	0	2e-05	5e-05	4e-05	-7.3	-2.093	0.352578	0.581802	0.050724	X	2	3	3
PF3D7_1223700	| transcript=PF3D7_1223700.1 | gene=PF3D7_1223700 | organism=Plasmodium_falciparum_3D7 | gene_product=vacuolar iron transporter | transcript_product=vacuolar iron transporter | location=Pf3D7_12_v3:968980-970073(+) | protein_length=273 | sequence_SO=chromosome | SO=protein_coding | is_pseudo=false	0.00018	9e-05	0.00027	0.00057	-1.2	-2.1029	0.348534	0.581528	0.04981	3	2	4	10
PF3D7_0316600	| transcript=PF3D7_0316600.1 | gene=PF3D7_0316600 | organism=Plasmodium_falciparum_3D7 | gene_product=formate-nitrite transporter | transcript_product=formate-nitrite transporter | location=Pf3D7_03_v3:669302-670873(-) | protein_length=309 | sequence_SO=chromosome | SO=protein_coding | is_pseudo=false	0	0.00015	0.00024	0.0002	-7.2	-2.1161	0.343191	0.581249	0.048905	X	4	4	4
PF3D7_1302800	| transcript=PF3D7_1302800.1 | gene=PF3D7_1302800 | organism=Plasmodium_falciparum_3D7 | gene_product=40S ribosomal protein S7, putative | transcript_product=40S ribosomal protein S7, putative | location=Pf3D7_13_v3:150783-151635(-) | protein_length=194 | sequence_SO=chromosome | SO=protein_coding | is_pseudo=false	0.00025	0	0.00028	0.00056	-8.7	-2.1227	0.340541	0.58125	0.048899	3	X	3	7
PF3D7_0936800	| transcript=PF3D7_0936800.1 | gene=PF3D7_0936800 | organism=Plasmodium_falciparum_3D7 | gene_product=Plasmodium exported protein (PHISTc), unknown function | transcript_product=Plasmodium exported protein (PHISTc), unknown function | location=Pf3D7_09_v3:1458392-1459862(+) | protein_length=383 | sequence_SO=chromosome | SO=protein_coding | is_pseudo=false	0.00042	0.00068	0.00137	0.00134	-0.9	-2.1241	0.339981	0.581251	0.048898	10	22	29	33
PF3D7_0810600	| transcript=PF3D7_0810600.1 | gene=PF3D7_0810600 | organism=Plasmodium_falciparum_3D7 | gene_product=ATP-dependent RNA helicase DBP1, putative | transcript_product=ATP-dependent RNA helicase DBP1, putative | location=Pf3D7_08_v3:541971-544796(+) | protein_length=941 | sequence_SO=chromosome | SO=protein_coding | is_pseudo=false	5e-05	3e-05	0.0001	0.00031	-1.6	-2.1295	0.337825	0.580964	0.048012	3	2	5	19
PF3D7_1024800	| transcript=PF3D7_1024800.1 | gene=PF3D7_1024800 | organism=Plasmodium_falciparum_3D7 | gene_product=exported protein 3 | transcript_product=exported protein 3 | location=Pf3D7_10_v3:1034685-1039079(+) | protein_length=1464 | sequence_SO=chromosome | SO=protein_coding | is_pseudo=false	0	3e-05	4e-05	0.00012	-7.7	-2.1309	0.337268	0.580964	0.048011	X	4	3	11
PF3D7_1330400	| transcript=PF3D7_1330400.1 | gene=PF3D7_1330400 | organism=Plasmodium_falciparum_3D7 | gene_product=ER lumen protein retaining receptor 1, putative, unspecified product | transcript_product=ER lumen protein retaining receptor 1, putative | location=Pf3D7_13_v3:1279800-1281285(-) | protein_length=284 | sequence_SO=chromosome | SO=protein_coding | is_pseudo=false	0	0	0	0.00016	-7.9	-2.1329	0.336473	0.580965	0.048009	X	X	X	3
PF3D7_0914700	| transcript=PF3D7_0914700.1 | gene=PF3D7_0914700 | organism=Plasmodium_falciparum_3D7 | gene_product=major facilitator superfamily-related transporter, putative | transcript_product=major facilitator superfamily-related transporter, putative | location=Pf3D7_09_v3:630657-632207(+) | protein_length=516 | sequence_SO=chromosome | SO=protein_coding | is_pseudo=false	0	0	0	0.00027	-8.7	-2.1617	0.325165	0.58038	0.046261	X	X	X	9
PF3D7_1238800	| transcript=PF3D7_1238800.1 | gene=PF3D7_1238800 | organism=Plasmodium_falciparum_3D7 | gene_product=acyl-CoA synthetase | transcript_product=acyl-CoA synthetase | location=Pf3D7_12_v3:1610363-1612741(+) | protein_length=792 | sequence_SO=chromosome | SO=protein_coding | is_pseudo=false	0	0	0	6e-05	-8.3	-2.3394	0.261204	0.576119	0.036088	X	X	X	3
PF3D7_1033200	| transcript=PF3D7_1033200.1 | gene=PF3D7_1033200 | organism=Plasmodium_falciparum_3D7 | gene_product=early transcribed membrane protein 10.2 | transcript_product=early transcribed membrane protein 10.2 | location=Pf3D7_10_v3:1335222-1336289(+) | protein_length=355 | sequence_SO=chromosome | SO=protein_coding | is_pseudo=false	0.00014	7e-05	0.00056	0.00035	-1.6	-2.3648	0.252864	0.575402	0.034697	3	2	11	8
PF3D7_0301600	| transcript=PF3D7_0301600.1 | gene=PF3D7_0301600 | organism=Plasmodium_falciparum_3D7 | gene_product=Plasmodium exported protein (hyp1), unknown function | transcript_product=Plasmodium exported protein (hyp1), unknown function | location=Pf3D7_03_v3:91115-93463(-) | protein_length=732 | sequence_SO=chromosome | SO=protein_coding | is_pseudo=false	0	0	7e-05	0	-8.2	-2.3857	0.24615	0.575039	0.034014	X	X	3	X
PF3D7_1301700	| transcript=PF3D7_1301700.1 | gene=PF3D7_1301700 | organism=Plasmodium_falciparum_3D7 | gene_product=CX3CL1-binding protein 2 | transcript_product=CX3CL1-binding protein 2 | location=Pf3D7_13_v3:99548-100521(+) | protein_length=245 | sequence_SO=chromosome | SO=protein_coding | is_pseudo=false	0.00138	0.00102	0.00222	0.00362	-0.9	-2.4324	0.231622	0.573548	0.031405	21	21	30	57
PF3D7_1457000	| transcript=PF3D7_1457000.1 | gene=PF3D7_1457000 | organism=Plasmodium_falciparum_3D7 | gene_product=signal peptide peptidase | transcript_product=signal peptide peptidase | location=Pf3D7_14_v3:2336649-2339153(-) | protein_length=412 | sequence_SO=chromosome | SO=protein_coding | is_pseudo=false	0	0	0	0.00015	-9.6	-2.4424	0.228596	0.57355	0.031401	X	X	X	4
PF3D7_0107800	| transcript=PF3D7_0107800.1 | gene=PF3D7_0107800 | organism=Plasmodium_falciparum_3D7 | gene_product=double-strand break repair protein MRE11 | transcript_product=double-strand break repair protein MRE11 | location=Pf3D7_01_v3:322371-326072(+) | protein_length=1233 | sequence_SO=chromosome | SO=protein_coding | is_pseudo=false	0	0	0	3e-05	-7.9	-2.4433	0.228325	0.573168	0.030781	X	X	X	2
PF3D7_0719600	| transcript=PF3D7_0719600.1 | gene=PF3D7_0719600 | organism=Plasmodium_falciparum_3D7 | gene_product=60S ribosomal protein L11a, putative | transcript_product=60S ribosomal protein L11a, putative | location=Pf3D7_07_v3:858742-859492(-) | protein_length=173 | sequence_SO=chromosome | SO=protein_coding | is_pseudo=false	0	0	0.00021	0	-8.8	-2.4451	0.227784	0.573168	0.030779	X	X	2	X
PF3D7_1366900	| transcript=PF3D7_1366900.1 | gene=PF3D7_1366900 | organism=Plasmodium_falciparum_3D7 | gene_product=conserved protein, unknown function | transcript_product=conserved protein, unknown function | location=Pf3D7_13_v3:2675590-2677966(+) | protein_length=685 | sequence_SO=chromosome | SO=protein_coding | is_pseudo=false	0	0	0	5e-05	-7.8	-2.4471	0.227184	0.573168	0.030777	X	X	X	2
PF3D7_1408100	| transcript=PF3D7_1408100.1 | gene=PF3D7_1408100 | organism=Plasmodium_falciparum_3D7 | gene_product=plasmepsin III | transcript_product=plasmepsin III | location=Pf3D7_14_v3:297468-298823(+) | protein_length=451 | sequence_SO=chromosome | SO=protein_coding | is_pseudo=false	0.00025	0.00018	0.00048	0.00062	-0.9	-2.4522	0.225659	0.573169	0.030775	7	7	12	18
PF3D7_0731100	| transcript=PF3D7_0731100.1 | gene=PF3D7_0731100 | organism=Plasmodium_falciparum_3D7 | gene_product=EMP1-trafficking protein | transcript_product=EMP1-trafficking protein | location=Pf3D7_07_v3:1338959-1341790(+) | protein_length=890 | sequence_SO=chromosome | SO=protein_coding | is_pseudo=false	0	0	0	3e-05	-8.2	-2.4627	0.222544	0.572785	0.030159	X	X	X	2
PF3D7_0820700	| transcript=PF3D7_0820700.1 | gene=PF3D7_0820700 | organism=Plasmodium_falciparum_3D7 | gene_product=2-oxoglutarate dehydrogenase E1 component | transcript_product=2-oxoglutarate dehydrogenase E1 component | location=Pf3D7_08_v3:932321-935626(+) | protein_length=1038 | sequence_SO=chromosome | SO=protein_coding | is_pseudo=false	6e-05	0	3e-05	4e-05	-7.5	-2.4959	0.212905	0.572011	0.028954	4	X	2	3
PF3D7_0936000	| transcript=PF3D7_0936000.1 | gene=PF3D7_0936000 | organism=Plasmodium_falciparum_3D7 | gene_product=ring-exported protein 2 | transcript_product=ring-exported protein 2 | location=Pf3D7_09_v3:1427642-1428022(-) | protein_length=94 | sequence_SO=chromosome | SO=protein_coding | is_pseudo=false	0	0.00051	0.00193	0.00116	-8.9	-2.5071	0.209725	0.571618	0.028368	X	4	10	7
PF3D7_1215900	| transcript=PF3D7_1215900.1 | gene=PF3D7_1215900 | organism=Plasmodium_falciparum_3D7 | gene_product=serpentine receptor, putative | transcript_product=serpentine receptor, putative | location=Pf3D7_12_v3:641552-643519(+) | protein_length=655 | sequence_SO=chromosome | SO=protein_coding | is_pseudo=false	0	0	0	5e-05	-8.4	-2.5254	0.204608	0.570826	0.027229	X	X	X	2
PF3D7_0532300	| transcript=PF3D7_0532300.1 | gene=PF3D7_0532300 | organism=Plasmodium_falciparum_3D7 | gene_product=Plasmodium exported protein (PHISTb), unknown function | transcript_product=Plasmodium exported protein (PHISTb), unknown function | location=Pf3D7_05_v3:1308278-1309940(+) | protein_length=509 | sequence_SO=chromosome | SO=protein_coding | is_pseudo=false	0	7e-05	0.00021	0.00086	-8.8	-2.5267	0.204248	0.570826	0.027227	X	3	6	28
PF3D7_1219600	| transcript=PF3D7_1219600.1 | gene=PF3D7_1219600 | organism=Plasmodium_falciparum_3D7 | gene_product=aminophospholipid-transporting P-ATPase | transcript_product=aminophospholipid-transporting P-ATPase | location=Pf3D7_12_v3:785571-790673(-) | protein_length=1555 | sequence_SO=chromosome | SO=protein_coding | is_pseudo=false	0	0	0	2e-05	-8.4	-2.531	0.203061	0.570826	0.027225	X	X	X	2
PF3D7_0204700	| transcript=PF3D7_0204700.1 | gene=PF3D7_0204700 | organism=Plasmodium_falciparum_3D7 | gene_product=hexose transporter | transcript_product=hexose transporter | location=Pf3D7_02_v3:205889-207403(-) | protein_length=504 | sequence_SO=chromosome | SO=protein_coding | is_pseudo=false	0	0	0	0.00037	-8.8	-2.5393	0.200784	0.570426	0.02667	X	X	X	12
PF3D7_1149000	| transcript=PF3D7_1149000.1 | gene=PF3D7_1149000 | organism=Plasmodium_falciparum_3D7 | gene_product=antigen 332, DBL-like protein | transcript_product=antigen 332, DBL-like protein | location=Pf3D7_11_v3:1950210-1968726(+) | protein_length=6093 | sequence_SO=chromosome | SO=protein_coding | is_pseudo=false	1e-05	0	1e-05	6e-05	-7.6	-2.6081	0.182656	0.568393	0.024019	4	X	3	22
PF3D7_0305300	| transcript=PF3D7_0305300.1 | gene=PF3D7_0305300 | organism=Plasmodium_falciparum_3D7 | gene_product=conserved Plasmodium membrane protein, unknown function | transcript_product=conserved Plasmodium membrane protein, unknown function | location=Pf3D7_03_v3:255276-258416(-) | protein_length=956 | sequence_SO=chromosome | SO=protein_coding | is_pseudo=false	0	0	0	5e-05	-8	-2.617	0.180406	0.568394	0.024015	X	X	X	3
PF3D7_1458000	| transcript=PF3D7_1458000.1 | gene=PF3D7_1458000 | organism=Plasmodium_falciparum_3D7 | gene_product=cysteine proteinase falcipain 1 | transcript_product=cysteine proteinase falcipain 1 | location=Pf3D7_14_v3:2387786-2389495(+) | protein_length=569 | sequence_SO=chromosome | SO=protein_coding | is_pseudo=false	0	4e-05	0.00029	0.00112	-9.3	-2.6254	0.178303	0.567981	0.023514	X	2	9	41
PF3D7_0528800	| transcript=PF3D7_0528800.1 | gene=PF3D7_0528800 | organism=Plasmodium_falciparum_3D7 | gene_product=nucleolar preribosomal GTPase, putative | transcript_product=nucleolar preribosomal GTPase, putative | location=Pf3D7_05_v3:1180425-1182038(-) | protein_length=537 | sequence_SO=chromosome | SO=protein_coding | is_pseudo=false	0.00012	0	7e-05	9e-05	-8.3	-2.6668	0.168211	0.56673	0.022056	4	X	2	3
PF3D7_0702500	| transcript=PF3D7_0702500.1 | gene=PF3D7_0702500 | organism=Plasmodium_falciparum_3D7 | gene_product=Plasmodium exported protein, unknown function | transcript_product=Plasmodium exported protein, unknown function | location=Pf3D7_07_v3:104957-105989(-) | protein_length=253 | sequence_SO=chromosome | SO=protein_coding | is_pseudo=false	0.00102	0.00028	0.00244	0.00849	-2	-2.6757	0.166101	0.56631	0.021591	16	6	34	138
PF3D7_0221200	| transcript=PF3D7_0221200.1 | gene=PF3D7_0221200 | organism=Plasmodium_falciparum_3D7 | gene_product=Plasmodium exported protein (hyp15), unknown function | transcript_product=Plasmodium exported protein (hyp15), unknown function | location=Pf3D7_02_v3:854966-855738(+) | protein_length=206 | sequence_SO=chromosome | SO=protein_coding | is_pseudo=false	0	0	0	0.00015	-8.3	-2.6856	0.163778	0.56631	0.021586	X	X	X	2
PF3D7_0824400	| transcript=PF3D7_0824400.1 | gene=PF3D7_0824400 | organism=Plasmodium_falciparum_3D7 | gene_product=nucleoside transporter 2 | transcript_product=nucleoside transporter 2 | location=Pf3D7_08_v3:1062304-1064061(-) | protein_length=585 | sequence_SO=chromosome | SO=protein_coding | is_pseudo=false	0	0	0	5e-05	-8	-2.6908	0.162568	0.565888	0.021129	X	X	X	2
PF3D7_0529000	| transcript=PF3D7_0529000.1 | gene=PF3D7_0529000 | organism=Plasmodium_falciparum_3D7 | gene_product=conserved Plasmodium protein, unknown function | transcript_product=conserved Plasmodium protein, unknown function | location=Pf3D7_05_v3:1186787-1188946(-) | protein_length=719 | sequence_SO=chromosome | SO=protein_coding | is_pseudo=false	9e-05	7e-05	0.00018	0.00022	-0.9	-2.6932	0.162012	0.565888	0.021128	4	4	7	10
PF3D7_1353100	| transcript=PF3D7_1353100.1 | gene=PF3D7_1353100 | organism=Plasmodium_falciparum_3D7 | gene_product=Plasmodium exported protein, unknown function | transcript_product=Plasmodium exported protein, unknown function | location=Pf3D7_13_v3:2124272-2125270(-) | protein_length=285 | sequence_SO=chromosome | SO=protein_coding | is_pseudo=false	0.00034	0.00042	0.00102	0.00191	-1.3	-2.7157	0.156871	0.565465	0.020673	6	10	16	35
PF3D7_0935900	| transcript=PF3D7_0935900.1 | gene=PF3D7_0935900 | organism=Plasmodium_falciparum_3D7 | gene_product=ring-exported protein 1 | transcript_product=ring-exported protein 1 | location=Pf3D7_09_v3:1420483-1422807(-) | protein_length=713 | sequence_SO=chromosome | SO=protein_coding | is_pseudo=false	5e-05	0.00012	0.00028	0.00072	-1.8	-2.724	0.155007	0.565039	0.02023	2	7	11	33
PF3D7_0532400	| transcript=PF3D7_0532400.1 | gene=PF3D7_0532400 | organism=Plasmodium_falciparum_3D7 | gene_product=lysine-rich membrane-associated PHISTb protein | transcript_product=lysine-rich membrane-associated PHISTb protein | location=Pf3D7_05_v3:1312471-1314154(+) | protein_length=528 | sequence_SO=chromosome | SO=protein_coding | is_pseudo=false	0.00018	0.00027	0.00058	0.00121	-1.3	-2.7241	0.154985	0.565039	0.02023	6	12	17	41
PF3D7_1401400	| transcript=PF3D7_1401400.1 | gene=PF3D7_1401400 | organism=Plasmodium_falciparum_3D7 | gene_product=early transcribed membrane protein 14.1 | transcript_product=early transcribed membrane protein 14.1 | location=Pf3D7_14_v3:53411-53734(-) | protein_length=107 | sequence_SO=chromosome | SO=protein_coding | is_pseudo=false	0	0	0	0.00233	-10	-2.7457	0.150217	0.564184	0.019369	X	X	X	16
PF3D7_1129900	| transcript=PF3D7_1129900.1 | gene=PF3D7_1129900 | organism=Plasmodium_falciparum_3D7 | gene_product=major facilitator superfamily-related transporter, putative | transcript_product=major facilitator superfamily-related transporter, putative | location=Pf3D7_11_v3:1156437-1158266(+) | protein_length=609 | sequence_SO=chromosome | SO=protein_coding | is_pseudo=false	0	0	0	0.00013	-9.2	-2.7643	0.146205	0.563755	0.018946	X	X	X	5
PF3D7_0702400	| transcript=PF3D7_0702400.1 | gene=PF3D7_0702400 | organism=Plasmodium_falciparum_3D7 | gene_product=small exported membrane protein 1 | transcript_product=small exported membrane protein 1 | location=Pf3D7_07_v3:101694-102285(+) | protein_length=123 | sequence_SO=chromosome | SO=protein_coding | is_pseudo=false	0.00433	0.0029	0.02037	0.00999	-1.4	-2.7789	0.143116	0.563324	0.018533	33	30	138	79
PF3D7_1129100	| transcript=PF3D7_1129100.1 | gene=PF3D7_1129100 | organism=Plasmodium_falciparum_3D7 | gene_product=parasitophorous vacuolar protein 1 | transcript_product=parasitophorous vacuolar protein 1 | location=Pf3D7_11_v3:1125952-1127310(+) | protein_length=452 | sequence_SO=chromosome | SO=protein_coding | is_pseudo=false	0.00029	0.00034	0.001	0.00134	-1.3	-2.9141	0.11691	0.55896	0.014806	8	13	25	39
PF3D7_1225700	| transcript=PF3D7_1225700.1 | gene=PF3D7_1225700 | organism=Plasmodium_falciparum_3D7 | gene_product=VAC14 domain-containing protein, putative | transcript_product=VAC14 domain-containing protein, putative | location=Pf3D7_12_v3:1039410-1043915(-) | protein_length=1501 | sequence_SO=chromosome | SO=protein_coding | is_pseudo=false	0	0	0	0.00019	-9	-2.921	0.115685	0.558961	0.014805	X	X	X	18
PF3D7_1340900	| transcript=PF3D7_1340900.1 | gene=PF3D7_1340900 | organism=Plasmodium_falciparum_3D7 | gene_product=sodium-dependent phosphate transporter | transcript_product=sodium-dependent phosphate transporter | location=Pf3D7_13_v3:1627311-1629480(+) | protein_length=687 | sequence_SO=chromosome | SO=protein_coding | is_pseudo=false	7e-05	5e-05	0.00016	0.00023	-1.1	-2.948	0.110989	0.558079	0.014141	3	3	6	10
PF3D7_0614300	| transcript=PF3D7_0614300.1 | gene=PF3D7_0614300 | organism=Plasmodium_falciparum_3D7 | gene_product=major facilitator superfamily-related transporter, putative | transcript_product=major facilitator superfamily-related transporter, putative | location=Pf3D7_06_v3:597484-600517(-) | protein_length=853 | sequence_SO=chromosome | SO=protein_coding | is_pseudo=false	0	0	0	5e-05	-8	-2.9482	0.110955	0.558079	0.014141	X	X	X	3
PF3D7_0831700	| transcript=PF3D7_0831700.1 | gene=PF3D7_0831700 | organism=Plasmodium_falciparum_3D7 | gene_product=heat shock protein 70 | transcript_product=heat shock protein 70 | location=Pf3D7_08_v3:1365467-1367506(-) | protein_length=679 | sequence_SO=chromosome | SO=protein_coding | is_pseudo=false	0	2e-05	0.00039	0.00031	-10.2	-2.9549	0.109814	0.557636	0.013821	0	1	14.8	13.7
PF3D7_0906600	| transcript=PF3D7_0906600.1 | gene=PF3D7_0906600 | organism=Plasmodium_falciparum_3D7 | gene_product=zinc finger protein, putative | transcript_product=zinc finger protein, putative | location=Pf3D7_09_v3:320811-323342(-) | protein_length=843 | sequence_SO=chromosome | SO=protein_coding | is_pseudo=false	0	0	4e-05	0	-8.3	-3.0117	0.100523	0.555864	0.012593	X	X	2	X
PF3D7_0113900	| transcript=PF3D7_0113900.1 | gene=PF3D7_0113900 | organism=Plasmodium_falciparum_3D7 | gene_product=CX3CL1-binding protein 1 | transcript_product=CX3CL1-binding protein 1 | location=Pf3D7_01_v3:537109-538025(-) | protein_length=243 | sequence_SO=chromosome | SO=protein_coding | is_pseudo=false	0.00013	0.0001	0.0003	0.00045	-1.1	-3.0541	0.094016	0.554532	0.011735	2	2	4	7
PF3D7_0501100	| transcript=PF3D7_0501100.1 | gene=PF3D7_0501100 | organism=Plasmodium_falciparum_3D7 | gene_product=heat shock protein 40, type II | transcript_product=heat shock protein 40, type II | location=Pf3D7_05_v3:58037-59726(-) | protein_length=402 | sequence_SO=chromosome | SO=protein_coding | is_pseudo=false	0.00028	0.00021	0.00068	0.00062	-1	-3.0632	0.092666	0.554087	0.011462	7	7	15	16
PF3D7_0418200	| transcript=PF3D7_0418200.1 | gene=PF3D7_0418200 | organism=Plasmodium_falciparum_3D7 | gene_product=eukaryotic translation initiation factor 3 subunit M, putative | transcript_product=eukaryotic translation initiation factor 3 subunit M, putative | location=Pf3D7_04_v3:817400-818689(+) | protein_length=429 | sequence_SO=chromosome | SO=protein_coding | is_pseudo=false	0	0.00022	0.00013	0.00044	-8.5	-3.0684	0.091902	0.554088	0.011461	X	8	3	12
PF3D7_1466900	| transcript=PF3D7_1466900.1 | gene=PF3D7_1466900 | organism=Plasmodium_falciparum_3D7 | gene_product=conserved Plasmodium protein, unknown function | transcript_product=conserved Plasmodium protein, unknown function | location=Pf3D7_14_v3:2736908-2741325(+) | protein_length=1416 | sequence_SO=chromosome | SO=protein_coding | is_pseudo=false	0	2e-05	3e-05	9e-05	-8.3	-3.1379	0.082177	0.551864	0.010169	X	2	2	8
PF3D7_1242300	| transcript=PF3D7_1242300.1 | gene=PF3D7_1242300 | organism=Plasmodium_falciparum_3D7 | gene_product=conserved Plasmodium membrane protein, unknown function | transcript_product=conserved Plasmodium membrane protein, unknown function | location=Pf3D7_12_v3:1793532-1794835(-) | protein_length=186 | sequence_SO=chromosome | SO=protein_coding | is_pseudo=false	0	0	0	0.00192	-10.6	-3.2066	0.073421	0.549643	0.009006	X	X	X	23
PF3D7_0406200	| transcript=PF3D7_0406200.1 | gene=PF3D7_0406200 | organism=Plasmodium_falciparum_3D7 | gene_product=sexual stage-specific protein precursor | transcript_product=sexual stage-specific protein precursor | location=Pf3D7_04_v3:329216-329689(+) | protein_length=157 | sequence_SO=chromosome | SO=protein_coding | is_pseudo=false	0.00041	0.00038	0.00104	0.00119	-1	-3.3329	0.059362	0.545225	0.007023	4	5	9	12
PF3D7_1121600	| transcript=PF3D7_1121600.1 | gene=PF3D7_1121600 | organism=Plasmodium_falciparum_3D7 | gene_product=exported protein 1 | transcript_product=exported protein 1 | location=Pf3D7_11_v3:815386-816322(-) | protein_length=162 | sequence_SO=chromosome | SO=protein_coding | is_pseudo=false	0.001	0.00081	0.00258	0.00355	-1.2	-3.5196	0.0428	0.539573	0.005019	10	11	23	37
PF3D7_0114100	| transcript=PF3D7_0114100.1 | gene=PF3D7_0114100 | organism=Plasmodium_falciparum_3D7 | gene_product=Pfmc-2TM Maurer's cleft two transmembrane protein | transcript_product=Pfmc-2TM Maurer's cleft two transmembrane protein | location=Pf3D7_01_v3:547597-548380(-) | protein_length=229 | sequence_SO=chromosome | SO=protein_coding | is_pseudo=false	0	0	0.0003	0.00233	-20.3	-16.4827	0	0.445444	0	X	X	3.8	34.3
PF3D7_0701600	| transcript=PF3D7_0701600.1 | gene=PF3D7_0701600 | organism=Plasmodium_falciparum_3D7 | gene_product=Pfmc-2TM Maurer's cleft two transmembrane protein | transcript_product=Pfmc-2TM Maurer's cleft two transmembrane protein | location=Pf3D7_07_v3:71049-71860(+) | protein_length=235 | sequence_SO=chromosome | SO=protein_coding | is_pseudo=false	0	0	0.00012	0.00074	-19.4	-18.02	0	0.445203	0	X	X	1.5	11.2
PF3D7_0423700	| transcript=PF3D7_0423700.1 | gene=PF3D7_0423700 | organism=Plasmodium_falciparum_3D7 | gene_product=early transcribed membrane protein 4 | transcript_product=early transcribed membrane protein 4 | location=Pf3D7_04_v3:1071435-1071845(-) | protein_length=136 | sequence_SO=chromosome | SO=protein_coding | is_pseudo=false	0	0	0.00027	0.0024	-20.2	-21.5968	0	0.444676	0	X	X	2	21
PF3D7_0214800	| transcript=PF3D7_0214800.1 | gene=PF3D7_0214800 | organism=Plasmodium_falciparum_3D7 | gene_product=conserved Plasmodium membrane protein, unknown function | transcript_product=conserved Plasmodium membrane protein, unknown function | location=Pf3D7_02_v3:605045-609325(+) | protein_length=1371 | sequence_SO=chromosome | SO=protein_coding | is_pseudo=false	0	0	3e-05	8e-05	-17.6	-29.4736	0	0.443037	0	X	X	2	7
PF3D7_0201800	| transcript=PF3D7_0201800.1 | gene=PF3D7_0201800 | organism=Plasmodium_falciparum_3D7 | gene_product=knob associated heat shock protein 40 | transcript_product=knob associated heat shock protein 40 | location=Pf3D7_02_v3:86832-88791(-) | protein_length=421 | sequence_SO=chromosome | SO=protein_coding | is_pseudo=false	0	0	0.0003	0.00096	-20	-30.317	0	0.442799	0	X	X	7	26
PF3D7_0202200	| transcript=PF3D7_0202200.1 | gene=PF3D7_0202200 | organism=Plasmodium_falciparum_3D7 | gene_product=EMP1-trafficking protein | transcript_product=EMP1-trafficking protein | location=Pf3D7_02_v3:112547-113682(-) | protein_length=290 | sequence_SO=chromosome | SO=protein_coding | is_pseudo=false	0	0	0.00013	0.00043	-19.2	-30.9173	0	0.442624	0	X	X	2	8
PF3D7_0631400	| transcript=PF3D7_0631400.1 | gene=PF3D7_0631400 | organism=Plasmodium_falciparum_3D7 | gene_product=Pfmc-2TM Maurer's cleft two transmembrane protein | transcript_product=Pfmc-2TM Maurer's cleft two transmembrane protein | location=Pf3D7_06_v3:1318327-1319116(-) | protein_length=231 | sequence_SO=chromosome | SO=protein_coding | is_pseudo=false	0	0	0.00054	0.00168	-20.6	-31.0821	0	0.442576	0	X	X	6.9	25
PF3D7_0101300	| transcript=PF3D7_0101300.1 | gene=PF3D7_0101300 | organism=Plasmodium_falciparum_3D7 | gene_product=Pfmc-2TM Maurer's cleft two transmembrane protein | transcript_product=Pfmc-2TM Maurer's cleft two transmembrane protein | location=Pf3D7_01_v3:74563-75366(+) | protein_length=235 | sequence_SO=chromosome | SO=protein_coding | is_pseudo=false	0	0	0.00096	0.00291	-21.1	-36.2418	0	0.441161	0	X	X	12.4	44
PF3D7_1132800	| transcript=PF3D7_1132800.1 | gene=PF3D7_1132800 | organism=Plasmodium_falciparum_3D7 | gene_product=aquaglyceroporin | transcript_product=aquaglyceroporin | location=Pf3D7_11_v3:1271204-1271980(+) | protein_length=258 | sequence_SO=chromosome | SO=protein_coding | is_pseudo=false	0	0	0.00014	0.00024	-19	-39.703	0	0.440425	0	X	X	2	4
PF3D7_0201900	| transcript=PF3D7_0201900.1 | gene=PF3D7_0201900 | organism=Plasmodium_falciparum_3D7 | gene_product=erythrocyte membrane protein 3 | transcript_product=erythrocyte membrane protein 3 | location=Pf3D7_02_v3:91318-98838(-) | protein_length=2441 | sequence_SO=chromosome | SO=protein_coding | is_pseudo=false	0	0	0.00073	0.00035	-20	-46.9736	0	0.439032	0	X	X	98	55
PF3D7_1477500	| transcript=PF3D7_1477500.1 | gene=PF3D7_1477500 | organism=Plasmodium_falciparum_3D7 | gene_product=Plasmodium exported protein (PHISTb), unknown function | transcript_product=Plasmodium exported protein (PHISTb), unknown function | location=Pf3D7_14_v3:3188888-3190548(+) | protein_length=500 | sequence_SO=chromosome | SO=protein_coding | is_pseudo=false	0	0	0.00011	6e-05	-18.2	-50.1053	0	0.438208	0	X	X	3	2
PF3D7_1420700	| transcript=PF3D7_1420700.1 | gene=PF3D7_1420700 | organism=Plasmodium_falciparum_3D7 | gene_product=surface protein P113 | transcript_product=surface protein P113 | location=Pf3D7_14_v3:860011-863080(+) | protein_length=969 | sequence_SO=chromosome | SO=protein_coding | is_pseudo=false	0	0	9e-05	8e-05	-18.2	-52.0894	0	0.437618	0	X	X	5	5
PF3D7_0402000	| transcript=PF3D7_0402000.1 | gene=PF3D7_0402000 | organism=Plasmodium_falciparum_3D7 | gene_product=Plasmodium exported protein (PHISTa), unknown function | transcript_product=Plasmodium exported protein (PHISTa), unknown function | location=Pf3D7_04_v3:114601-116058(-) | protein_length=428 | sequence_SO=chromosome | SO=protein_coding | is_pseudo=false	0	0	0.00017	0.00025	-19.1	-52.4345	0	0.437516	0	X	X	4	7
PF3D7_0202000	| transcript=PF3D7_0202000.1 | gene=PF3D7_0202000 | organism=Plasmodium_falciparum_3D7 | gene_product=knob-associated histidine-rich protein | transcript_product=knob-associated histidine-rich protein | location=Pf3D7_02_v3:103385-105796(-) | protein_length=654 | sequence_SO=chromosome | SO=protein_coding | is_pseudo=false	0	0	0.02368	0.04682	-24.2	-53.9583	0	0.437068	0	X	X	853	1968
PF3D7_0401400	| transcript=PF3D7_0401400.1 | gene=PF3D7_0401400 | organism=Plasmodium_falciparum_3D7 | gene_product=rifin | transcript_product=rifin | location=Pf3D7_04_v3:85397-86608(+) | protein_length=329 | sequence_SO=chromosome | SO=protein_coding | is_pseudo=false	0	0	0.00022	0.00019	-19.1	-62.204	0	0.435206	0	X	X	4	4
PF3D7_0201600	| transcript=PF3D7_0201600.1 | gene=PF3D7_0201600 | organism=Plasmodium_falciparum_3D7 | gene_product=PHISTb domain-containing RESA-like protein 1 | transcript_product=PHISTb domain-containing RESA-like protein 1 | location=Pf3D7_02_v3:77251-78808(-) | protein_length=485 | sequence_SO=chromosome | SO=protein_coding | is_pseudo=false	0	0	0.00019	0.00016	-19	-63.3678	0	0.43496	0	X	X	5	5
PF3D7_0605900	| transcript=PF3D7_0605900.1 | gene=PF3D7_0605900 | organism=Plasmodium_falciparum_3D7 | gene_product=long chain polyunsaturated fatty acid elongation enzyme, putative | transcript_product=long chain polyunsaturated fatty acid elongation enzyme, putative | location=Pf3D7_06_v3:247640-249166(+) | protein_length=293 | sequence_SO=chromosome | SO=protein_coding | is_pseudo=false	0	0	0.00012	0.00016	-18.7	-64.247	0	0.434775	0	X	X	2	3
PF3D7_1101700	| transcript=PF3D7_1101700.1 | gene=PF3D7_1101700 | organism=Plasmodium_falciparum_3D7 | gene_product=Pfmc-2TM Maurer's cleft two transmembrane protein | transcript_product=Pfmc-2TM Maurer's cleft two transmembrane protein | location=Pf3D7_11_v3:85629-86418(+) | protein_length=231 | sequence_SO=chromosome | SO=protein_coding | is_pseudo=false	0	0	0.00054	0.00063	-20.2	-67.9837	0	0.434079	0	X	X	6.9	9.4

## Sheet: File_3b_proteomics
Supplementary File 3b: Raw data showing proteins identified by MudPIT analysis after PfMORC-HA immunoprecipitation.
	Column ends with:
	_P	Peptide Count
	_S	Spectral Count
	_uS	Unique Spectral Count
	_sS	Shared Spectral Count
	_dS	Distributed Spectral Count
	_SC	Sequence Coverage (%)
	_dNSAF	Distributed Normalized Spectral Abundance Factor
dNSAF_Rank	MORC dNSAF AVG	MORC Detected # Out of 2	Control dNSAF AVG	Control Detected # Out of 2	Total Proteins In Group	Proteins In Group	Contrast_Rank	Locus	Description	MORC-HA_1-Smn7-s10-v2-p2-r2_P	MORC-HA_1-Smn7-s10-v2-p2-r2_S	MORC-HA_1-Smn7-s10-v2-p2-r2_uS	MORC-HA_1-Smn7-s10-v2-p2-r2_sS	MORC-HA_1-Smn7-s10-v2-p2-r2_dS	MORC-HA_1-Smn7-s10-v2-p2-r2_SC	MORC-HA_1-Smn7-s10-v2-p2-r2_dNSAF	MORC-HA_2-Smn7-s10-v2-p2-r2_P	MORC-HA_2-Smn7-s10-v2-p2-r2_S	MORC-HA_2-Smn7-s10-v2-p2-r2_uS	MORC-HA_2-Smn7-s10-v2-p2-r2_sS	MORC-HA_2-Smn7-s10-v2-p2-r2_dS	MORC-HA_2-Smn7-s10-v2-p2-r2_SC	MORC-HA_2-Smn7-s10-v2-p2-r2_dNSAF	Control_1-Smn7-s10-v2-p2-r2_P	Control_1-Smn7-s10-v2-p2-r2_S	Control_1-Smn7-s10-v2-p2-r2_uS	Control_1-Smn7-s10-v2-p2-r2_sS	Control_1-Smn7-s10-v2-p2-r2_dS	Control_1-Smn7-s10-v2-p2-r2_SC	Control_1-Smn7-s10-v2-p2-r2_dNSAF	Control_2-Smn7-s10-v2-p2-r2_P	Control_2-Smn7-s10-v2-p2-r2_S	Control_2-Smn7-s10-v2-p2-r2_uS	Control_2-Smn7-s10-v2-p2-r2_sS	Control_2-Smn7-s10-v2-p2-r2_dS	Control_2-Smn7-s10-v2-p2-r2_SC	Control_2-Smn7-s10-v2-p2-r2_dNSAF	Length	MW	pI
1	0.000208	2	0.000212	2	1	PF3D7_0507700.1-p1	1	PF3D7_0507700.1-p1	| transcript=PF3D7_0507700.1 | gene=PF3D7_0507700 | organism=Plasmodium_falciparum_3D7 | gene_product=nuclear protein localization protein 4, putative | transcript_product=nuclear protein localization protein 4, putative | location=Pf3D7_05_v3:316766-318361(-) | protein_length=531 | sequence_SO=chromosome | SO=protein_coding | is_pseudo=false	3	10	10	0	10	7.53	0.000304	3	5	5	0	5	7.53	0.000112	1	3	3	0	3	1.88	0.000103	5	11	11	0	11	13.56	0.000322	531	62575	6.9
2	7.1e-05	2	3.4e-05	1	1	PF3D7_0528100.1-p1	2	PF3D7_0528100.1-p1	| transcript=PF3D7_0528100.1 | gene=PF3D7_0528100 | organism=Plasmodium_falciparum_3D7 | gene_product=AP-1 complex subunit beta, putative | transcript_product=AP-1 complex subunit beta, putative | location=Pf3D7_05_v3:1157840-1161553(-) | protein_length=929 | sequence_SO=chromosome | SO=protein_coding | is_pseudo=false	2	6	6	0	6	3.55	0.000104	2	3	3	0	3	3.55	3.84e-05	X	X	X	X	X	X	X	1	2	2	0	2	1.29	3.35e-05	929	106154	6
3	0.000358	2	0.00011	1	1	PF3D7_1437900.1-p1	3	PF3D7_1437900.1-p1	| transcript=PF3D7_1437900.1 | gene=PF3D7_1437900 | organism=Plasmodium_falciparum_3D7 | gene_product=HSP40, subfamily A | transcript_product=HSP40, subfamily A | location=Pf3D7_14_v3:1533329-1534947(+) | protein_length=424 | sequence_SO=chromosome | SO=protein_coding | is_pseudo=false	4	7	7	0	7	8.02	0.000267	5	16	16	0	16	12.74	0.000449	X	X	X	X	X	X	X	2	3	3	0	3	4.95	0.00011	424	48469	7.2
4	0.000914	2	0.000559	2	1	PF3D7_1407100.1-p1	4	PF3D7_1407100.1-p1	| transcript=PF3D7_1407100.1 | gene=PF3D7_1407100 | organism=Plasmodium_falciparum_3D7 | gene_product=rRNA 2'-O-methyltransferase fibrillarin, putative | transcript_product=rRNA 2'-O-methyltransferase fibrillarin, putative | location=Pf3D7_14_v3:258746-259988(+) | protein_length=318 | sequence_SO=chromosome | SO=protein_coding | is_pseudo=false	8	22	22	0	22	24.84	0.001117	6	19	19	0	19	21.38	0.000711	2	5	5	0	5	9.12	0.000285	10	17	17	0	17	21.38	0.000832	318	34129	10
5	0.000189	2	0.000125	2	1	PF3D7_1451800.1-p1	5	PF3D7_1451800.1-p1	| transcript=PF3D7_1451800.1 | gene=PF3D7_1451800 | organism=Plasmodium_falciparum_3D7 | gene_product=sortilin | transcript_product=sortilin | location=Pf3D7_14_v3:2123461-2126599(+) | protein_length=895 | sequence_SO=chromosome | SO=protein_coding | is_pseudo=false	7	15	15	0	15	9.61	0.000271	4	8	8	0	8	4.36	0.000106	1	2	2	0	2	1.12	4.06e-05	6	12	12	0	12	9.5	0.000209	895	102270	6.7
9	0.000249	1	0.000124	2	1	PF3D7_1108400.1-p1	9	PF3D7_1108400.1-p1	| transcript=PF3D7_1108400.1 | gene=PF3D7_1108400 | organism=Plasmodium_falciparum_3D7 | gene_product=casein kinase 2, alpha subunit | transcript_product=casein kinase 2, alpha subunit | location=Pf3D7_11_v3:365093-366100(+) | protein_length=335 | sequence_SO=chromosome | SO=protein_coding | is_pseudo=false	X	X	X	X	X	X	X	4	7	7	0	7	17.31	0.000249	1	2	2	0	2	3.28	0.000108	1	3	3	0	3	3.28	0.000139	335	39890	8.8
11	4.7e-05	2	3.6e-05	1	1	PF3D7_0706500.1-p1	11	PF3D7_0706500.1-p1	| transcript=PF3D7_0706500.1 | gene=PF3D7_0706500 | organism=Plasmodium_falciparum_3D7 | gene_product=conserved Plasmodium protein, unknown function | transcript_product=conserved Plasmodium protein, unknown function | location=Pf3D7_07_v3:309902-315022(-) | protein_length=1706 | sequence_SO=chromosome | SO=protein_coding | is_pseudo=false	1	4	4	0	4	1.35	3.79e-05	1	8	8	0	8	1.35	5.58e-05	X	X	X	X	X	X	X	1	4	4	0	4	1.35	3.65e-05	1706	196569	8.1
12	0.003618	2	0.015181	2	1	PF3D7_0702400.1-p1	12	PF3D7_0702400.1-p1	| transcript=PF3D7_0702400.1 | gene=PF3D7_0702400 | organism=Plasmodium_falciparum_3D7 | gene_product=small exported membrane protein 1 | transcript_product=small exported membrane protein 1 | location=Pf3D7_07_v3:101694-102285(+) | protein_length=123 | sequence_SO=chromosome | SO=protein_coding | is_pseudo=false	2	33	33	0	33	6.5	0.004333	3	30	30	0	30	19.51	0.002903	5	138	138	0	138	39.02	0.020368	6	79	79	0	79	39.84	0.009994	123	14195	9.6
13	3.6e-05	1	3.4e-05	1	1	PF3D7_1466800.1-p1	13	PF3D7_1466800.1-p1	| transcript=PF3D7_1466800.1 | gene=PF3D7_1466800 | organism=Plasmodium_falciparum_3D7 | gene_product=conserved Plasmodium protein, unknown function | transcript_product=conserved Plasmodium protein, unknown function | location=Pf3D7_14_v3:2731986-2734694(+) | protein_length=902 | sequence_SO=chromosome | SO=protein_coding | is_pseudo=false	1	2	2	0	2	1.77	3.58e-05	X	X	X	X	X	X	X	X	X	X	X	X	X	X	1	2	2	0	2	1.77	3.45e-05	902	105448	8.5
14	4.4e-05	1	0	0	1	PF3D7_1437000.1-p1	14	PF3D7_1437000.1-p1	| transcript=PF3D7_1437000.1 | gene=PF3D7_1437000 | organism=Plasmodium_falciparum_3D7 | gene_product=N-acetyltransferase, GNAT family, putative | transcript_product=N-acetyltransferase, GNAT family, putative | location=Pf3D7_14_v3:1502648-1504861(+) | protein_length=544 | sequence_SO=chromosome | SO=protein_coding | is_pseudo=false	X	X	X	X	X	X	X	1	2	2	0	2	2.76	4.38e-05	X	X	X	X	X	X	X	X	X	X	X	X	X	X	544	64188	8
16	4.9e-05	1	0	0	1	PF3D7_0527900.1-p1	16	PF3D7_0527900.1-p1	| transcript=PF3D7_0527900.1 | gene=PF3D7_0527900 | organism=Plasmodium_falciparum_3D7 | gene_product=ATP-dependent RNA helicase DDX41, putative | transcript_product=ATP-dependent RNA helicase DDX41, putative | location=Pf3D7_05_v3:1153676-1155673(+) | protein_length=665 | sequence_SO=chromosome | SO=protein_coding | is_pseudo=false	1	2	2	0	2	1.65	4.86e-05	X	X	X	X	X	X	X	X	X	X	X	X	X	X	X	X	X	X	X	X	X	665	76205	8.3
20	0.001196	2	0.002283	2	1	PF3D7_0713700.1-p1	20	PF3D7_0713700.1-p1	| transcript=PF3D7_0713700.1 | gene=PF3D7_0713700 | organism=Plasmodium_falciparum_3D7 | gene_product=conserved Plasmodium protein, unknown function | transcript_product=conserved Plasmodium protein, unknown function | location=Pf3D7_07_v3:621463-623521(-) | protein_length=209 | sequence_SO=chromosome | SO=protein_coding | is_pseudo=false	6	14	14	0	14	35.89	0.001082	6	23	23	0	23	35.89	0.00131	4	20	20	0	20	30.62	0.001737	6	38	38	0	38	30.62	0.002829	209	24381	5.4
22	0.000157	1	0	0	1	PF3D7_1333600.1-p1	22	PF3D7_1333600.1-p1	| transcript=PF3D7_1333600.1 | gene=PF3D7_1333600 | organism=Plasmodium_falciparum_3D7 | gene_product=U3 small nucleolar RNA-associated protein 4, putative | transcript_product=U3 small nucleolar RNA-associated protein 4, putative | location=Pf3D7_13_v3:1373390-1377397(-) | protein_length=1335 | sequence_SO=chromosome | SO=protein_coding | is_pseudo=false	2	13	13	0	13	1.35	0.000157	X	X	X	X	X	X	X	X	X	X	X	X	X	X	X	X	X	X	X	X	X	1335	159337	8.1
23	0.000508	2	0.000617	2	1	PF3D7_0520000.1-p1	23	PF3D7_0520000.1-p1	| transcript=PF3D7_0520000.1 | gene=PF3D7_0520000 | organism=Plasmodium_falciparum_3D7 | gene_product=40S ribosomal protein S9, putative | transcript_product=40S ribosomal protein S9, putative | location=Pf3D7_05_v3:828953-829883(+) | protein_length=189 | sequence_SO=chromosome | SO=protein_coding | is_pseudo=false	3	6	6	0	6	25.93	0.000513	4	8	8	0	8	30.16	0.000504	2	6	6	0	6	20.11	0.000576	3	8	8	0	8	25.93	0.000659	189	22123	10.4
25	6.4e-05	2	6.8e-05	2	1	PF3D7_0811600.1-p1	25	PF3D7_0811600.1-p1	| transcript=PF3D7_0811600.1 | gene=PF3D7_0811600 | organism=Plasmodium_falciparum_3D7 | gene_product=conserved protein, unknown function | transcript_product=conserved protein, unknown function | location=Pf3D7_08_v3:582983-586953(-) | protein_length=1210 | sequence_SO=chromosome | SO=protein_coding | is_pseudo=false	2	3	3	0	3	3.47	4e-05	5	9	9	0	9	6.53	8.85e-05	2	3	3	0	3	4.05	4.5e-05	5	7	7	0	7	7.44	9e-05	1210	144007	7
26	0.00023	2	0.000377	2	1	PF3D7_1464700.1-p1	26	PF3D7_1464700.1-p1	| transcript=PF3D7_1464700.1 | gene=PF3D7_1464700 | organism=Plasmodium_falciparum_3D7 | gene_product=ATP synthase (C/AC39) subunit, putative | transcript_product=ATP synthase (C/AC39) subunit, putative | location=Pf3D7_14_v3:2625452-2626600(-) | protein_length=382 | sequence_SO=chromosome | SO=protein_coding | is_pseudo=false	2	5	5	0	5	6.81	0.000211	5	8	8	0	8	15.71	0.000249	2	3	3	0	3	6.81	0.000143	5	15	15	0	15	15.18	0.000611	382	44532	5.1
28	1.1e-05	1	0	0	1	PF3D7_1004200.1-p1	28	PF3D7_1004200.1-p1	| transcript=PF3D7_1004200.1 | gene=PF3D7_1004200 | organism=Plasmodium_falciparum_3D7 | gene_product=WD repeat-containing protein, putative | transcript_product=WD repeat-containing protein, putative | location=Pf3D7_10_v3:187669-196954(-) | protein_length=3013 | sequence_SO=chromosome | SO=protein_coding | is_pseudo=false	1	2	2	0	2	0.46	1.07e-05	X	X	X	X	X	X	X	X	X	X	X	X	X	X	X	X	X	X	X	X	X	3013	358077	8.9
29	0.001537	2	7.9e-05	1	1	PF3D7_1141800.1-p1	29	PF3D7_1141800.1-p1	| transcript=PF3D7_1141800.1 | gene=PF3D7_1141800 | organism=Plasmodium_falciparum_3D7 | gene_product=EELM2 domain-containing protein, putative | transcript_product=EELM2 domain-containing protein, putative | location=Pf3D7_11_v3:1672519-1674557(-) | protein_length=394 | sequence_SO=chromosome | SO=protein_coding | is_pseudo=false	7	47	47	0	47	23.86	0.001926	7	38	38	0	38	27.66	0.001148	X	X	X	X	X	X	X	1	2	2	0	2	2.54	7.9e-05	394	46666	6.2
35	0.000933	2	0.000734	2	1	PF3D7_1212700.1-p1	35	PF3D7_1212700.1-p1	| transcript=PF3D7_1212700.1 | gene=PF3D7_1212700 | organism=Plasmodium_falciparum_3D7 | gene_product=eukaryotic translation initiation factor 3 subunit A, putative | transcript_product=eukaryotic translation initiation factor 3 subunit A, putative | location=Pf3D7_12_v3:558047-562180(-) | protein_length=1377 | sequence_SO=chromosome | SO=protein_coding | is_pseudo=false	9	95	95	0	95	9.3	0.001114	12	87	87	0	87	11.84	0.000752	3	17	17	0	17	3.78	0.000224	15	110	110	0	110	15.54	0.001243	1377	166061	6.8
37	3.5e-05	1	3.4e-05	1	1	PF3D7_1033600.1-p1	37	PF3D7_1033600.1-p1	| transcript=PF3D7_1033600.1 | gene=PF3D7_1033600 | organism=Plasmodium_falciparum_3D7 | gene_product=pre-mRNA-splicing factor CEF1, putative | transcript_product=pre-mRNA-splicing factor CEF1, putative | location=Pf3D7_10_v3:1344150-1346897(-) | protein_length=915 | sequence_SO=chromosome | SO=protein_coding | is_pseudo=false	1	2	2	0	2	1.86	3.53e-05	X	X	X	X	X	X	X	X	X	X	X	X	X	X	1	2	2	0	2	1.86	3.4e-05	915	108410	6.6
38	4.6e-05	2	0	0	1	PF3D7_0311800.1-p1	38	PF3D7_0311800.1-p1	| transcript=PF3D7_0311800.1 | gene=PF3D7_0311800 | organism=Plasmodium_falciparum_3D7 | gene_product=ATP synthase F0 subunit d-like protein, putative | transcript_product=ATP synthase F0 subunit d-like protein, putative | location=Pf3D7_03_v3:506655-508846(+) | protein_length=609 | sequence_SO=chromosome | SO=protein_coding | is_pseudo=false	1	2	2	0	2	1.48	5.3e-05	1	2	2	0	2	1.48	3.91e-05	X	X	X	X	X	X	X	X	X	X	X	X	X	X	609	73524	6.2
39	0.000495	2	4.7e-05	1	1	PF3D7_0519800.1-p1	40	PF3D7_0519800.1-p1	| transcript=PF3D7_0519800.1 | gene=PF3D7_0519800 | organism=Plasmodium_falciparum_3D7 | gene_product=EELM2 domain-containing protein, putative | transcript_product=EELM2 domain-containing protein, putative | location=Pf3D7_05_v3:820719-822908(-) | protein_length=668 | sequence_SO=chromosome | SO=protein_coding | is_pseudo=false	7	24	24	0	24	13.32	0.00058	8	23	23	0	23	18.26	0.00041	X	X	X	X	X	X	X	1	2	2	0	2	1.65	4.66e-05	668	78291	5.4
40	7.5e-05	2	3.9e-05	2	1	PF3D7_0318200.1-p1	41	PF3D7_0318200.1-p1	| transcript=PF3D7_0318200.1 | gene=PF3D7_0318200 | organism=Plasmodium_falciparum_3D7 | gene_product=DNA-directed RNA polymerase II subunit RPB1 | transcript_product=DNA-directed RNA polymerase II subunit RPB1 | location=Pf3D7_03_v3:748465-755838(+) | protein_length=2457 | sequence_SO=chromosome | SO=protein_coding | is_pseudo=false	4	8	8	0	8	2.12	5.26e-05	5	20	20	0	20	3.7	9.69e-05	1	2	2	0	2	0.85	1.48e-05	3	10	10	0	10	2.6	6.33e-05	2457	278676	5.6
42	4.7e-05	2	0	0	1	PF3D7_0816600.1-p1	43	PF3D7_0816600.1-p1	| transcript=PF3D7_0816600.1 | gene=PF3D7_0816600 | organism=Plasmodium_falciparum_3D7 | gene_product=chaperone protein ClpB1 | transcript_product=chaperone protein ClpB1 | location=Pf3D7_08_v3:762118-765330(-) | protein_length=1070 | sequence_SO=chromosome | SO=protein_coding | is_pseudo=false	2	4	4	0	4	1.5	6.04e-05	2	3	3	0	3	2.24	3.34e-05	X	X	X	X	X	X	X	X	X	X	X	X	X	X	1070	122508	8.5
44	0.000102	2	0.000457	2	1	PF3D7_1033200.1-p1	45	PF3D7_1033200.1-p1	| transcript=PF3D7_1033200.1 | gene=PF3D7_1033200 | organism=Plasmodium_falciparum_3D7 | gene_product=early transcribed membrane protein 10.2 | transcript_product=early transcribed membrane protein 10.2 | location=Pf3D7_10_v3:1335222-1336289(+) | protein_length=355 | sequence_SO=chromosome | SO=protein_coding | is_pseudo=false	1	3	3	0	3	4.51	0.000136	1	2	2	0	2	4.51	6.71e-05	3	11	11	0	11	11.83	0.000563	4	8	8	0	8	18.59	0.000351	355	38926	9.4
45	3.9e-05	1	0	0	1	PF3D7_1230700.1-p1	46	PF3D7_1230700.1-p1	| transcript=PF3D7_1230700.1 | gene=PF3D7_1230700 | organism=Plasmodium_falciparum_3D7 | gene_product=protein transport protein SEC13 | transcript_product=protein transport protein SEC13 | location=Pf3D7_12_v3:1259620-1262088(+) | protein_length=822 | sequence_SO=chromosome | SO=protein_coding | is_pseudo=false	2	2	2	0	2	3.28	3.93e-05	X	X	X	X	X	X	X	X	X	X	X	X	X	X	X	X	X	X	X	X	X	822	90749	6.6
46	3.9e-05	2	2.4e-05	1	1	PF3D7_1239800.1-p1	47	PF3D7_1239800.1-p1	| transcript=PF3D7_1239800.1 | gene=PF3D7_1239800 | organism=Plasmodium_falciparum_3D7 | gene_product=conserved Plasmodium protein, unknown function | transcript_product=conserved Plasmodium protein, unknown function | location=Pf3D7_12_v3:1660451-1677754(+) | protein_length=5767 | sequence_SO=chromosome | SO=protein_coding | is_pseudo=false	2	15	15	0	15	0.14	4.2e-05	2	17	17	0	17	0.14	3.51e-05	X	X	X	X	X	X	X	2	9	9	0	9	0.33	2.43e-05	5767	691433	5.8
48	0.000297	2	0.000221	2	1	PF3D7_1368100.1-p1	49	PF3D7_1368100.1-p1	| transcript=PF3D7_1368100.1 | gene=PF3D7_1368100 | organism=Plasmodium_falciparum_3D7 | gene_product=26S proteasome regulatory subunit RPN11, putative | transcript_product=26S proteasome regulatory subunit RPN11, putative | location=Pf3D7_13_v3:2710406-2711718(-) | protein_length=311 | sequence_SO=chromosome | SO=protein_coding | is_pseudo=false	2	7	7	0	7	14.47	0.000364	3	6	6	0	6	18.65	0.00023	2	5	5	0	5	14.47	0.000292	1	3	3	0	3	7.07	0.00015	311	35212	6.7
50	5.3e-05	2	1.4e-05	1	1	PF3D7_0605800.1-p1	51	PF3D7_0605800.1-p1	| transcript=PF3D7_0605800.1 | gene=PF3D7_0605800 | organism=Plasmodium_falciparum_3D7 | gene_product=DNA repair protein RAD50, putative | transcript_product=DNA repair protein RAD50, putative | location=Pf3D7_06_v3:237811-244521(-) | protein_length=2236 | sequence_SO=chromosome | SO=protein_coding | is_pseudo=false	5	11	11	0	11	2.59	7.95e-05	4	5	5	0	5	2.59	2.66e-05	X	X	X	X	X	X	X	1	2	2	0	2	0.49	1.39e-05	2236	267955	8.6
51	0.000117	2	5.7e-05	2	1	PF3D7_1118500.1-p1	52	PF3D7_1118500.1-p1	| transcript=PF3D7_1118500.1 | gene=PF3D7_1118500 | organism=Plasmodium_falciparum_3D7 | gene_product=nucleolar protein 56, putative | transcript_product=nucleolar protein 56, putative | location=Pf3D7_11_v3:703175-704959(+) | protein_length=594 | sequence_SO=chromosome | SO=protein_coding | is_pseudo=false	2	2	2	0	2	4.88	5.44e-05	4	9	9	0	9	8.75	0.00018	1	2	2	0	2	2.02	6.11e-05	1	2	2	0	2	2.02	5.24e-05	594	69390	5.9
53	0	0	0	0	1	PF3D7_1319800.1-p1	54	PF3D7_1319800.1-p1	| transcript=PF3D7_1319800.1 | gene=PF3D7_1319800 | organism=Plasmodium_falciparum_3D7 | gene_product=conserved Plasmodium protein, unknown function | transcript_product=conserved Plasmodium protein, unknown function | location=Pf3D7_13_v3:820741-821178(+) | protein_length=145 | sequence_SO=chromosome | SO=protein_coding | is_pseudo=false	X	X	X	X	X	X	X	X	X	X	X	X	X	X	X	X	X	X	X	X	X	X	X	X	X	X	X	X	145	16762	6.5
55	0.016685	2	0.036303	2	1	PF3D7_1471100.1-p1	56	PF3D7_1471100.1-p1	| transcript=PF3D7_1471100.1 | gene=PF3D7_1471100 | organism=Plasmodium_falciparum_3D7 | gene_product=exported protein 2 | transcript_product=exported protein 2 | location=Pf3D7_14_v3:2905163-2906565(-) | protein_length=287 | sequence_SO=chromosome | SO=protein_coding | is_pseudo=false	9	411	411	0	411	29.62	0.023127	10	247	247	0	247	31.71	0.010242	10	439	439	0	439	34.15	0.027769	10	827	827	0	827	37.98	0.044838	287	33412	5.3
56	3.5e-05	1	0	0	1	PF3D7_0526500.1-p1	57	PF3D7_0526500.1-p1	| transcript=PF3D7_0526500.1 | gene=PF3D7_0526500 | organism=Plasmodium_falciparum_3D7 | gene_product=conserved Plasmodium protein, unknown function | transcript_product=conserved Plasmodium protein, unknown function | location=Pf3D7_05_v3:1090930-1095084(+) | protein_length=1384 | sequence_SO=chromosome | SO=protein_coding | is_pseudo=false	2	3	3	0	3	2.6	3.5e-05	X	X	X	X	X	X	X	X	X	X	X	X	X	X	X	X	X	X	X	X	X	1384	165382	7.7
58	0.000466	2	0.000324	2	1	PF3D7_0206800.1-p1	59	PF3D7_0206800.1-p1	| transcript=PF3D7_0206800.1 | gene=PF3D7_0206800 | organism=Plasmodium_falciparum_3D7 | gene_product=merozoite surface protein 2 | transcript_product=merozoite surface protein 2 | location=Pf3D7_02_v3:273689-274507(-) | protein_length=272 | sequence_SO=chromosome | SO=protein_coding | is_pseudo=false	4	12	12	0	12	23.9	0.000712	3	5	5	0	5	13.6	0.000219	1	2	2	0	2	4.41	0.000133	4	9	9	0	9	14.71	0.000515	272	27957	5.6
59	0.000617	2	0.000312	2	1	PF3D7_1220900.1-p1	60	PF3D7_1220900.1-p1	| transcript=PF3D7_1220900.1 | gene=PF3D7_1220900 | organism=Plasmodium_falciparum_3D7 | gene_product=heterochromatin protein 1 | transcript_product=heterochromatin protein 1 | location=Pf3D7_12_v3:831252-832052(-) | protein_length=266 | sequence_SO=chromosome | SO=protein_coding | is_pseudo=false	4	10	10	0	10	24.06	0.000607	4	14	14	0	14	24.06	0.000626	1	4	4	0	4	6.39	0.000273	3	6	6	0	6	16.54	0.000351	266	31018	9.5
60	0.00029	2	0.00025	1	1	PF3D7_1123900.1-p1	61	PF3D7_1123900.1-p1	| transcript=PF3D7_1123900.1 | gene=PF3D7_1123900 | organism=Plasmodium_falciparum_3D7 | gene_product=13 kDa ribonucleoprotein-associated protein, putative | transcript_product=13 kDa ribonucleoprotein-associated protein, putative | location=Pf3D7_11_v3:945470-946148(+) | protein_length=145 | sequence_SO=chromosome | SO=protein_coding | is_pseudo=false	1	3	3	0	3	13.1	0.000334	1	3	3	0	3	13.1	0.000246	1	2	2	0	2	13.1	0.00025	X	X	X	X	X	X	X	145	16012	5.2
64	0.004174	2	0.003598	2	1	PF3D7_1027800.1-p1	65	PF3D7_1027800.1-p1	| transcript=PF3D7_1027800.1 | gene=PF3D7_1027800 | organism=Plasmodium_falciparum_3D7 | gene_product=60S ribosomal protein L3 | transcript_product=60S ribosomal protein L3 | location=Pf3D7_10_v3:1153271-1154431(-) | protein_length=386 | sequence_SO=chromosome | SO=protein_coding | is_pseudo=false	22	120	69	51	118.3	47.41	0.004949	23	112	63	49	110.3	46.37	0.003399	11	63	44	19	63	28.5	0.002963	17	106	55	51	105	42.23	0.004233	386	44221	10.2
67	0.001686	2	0.002975	2	1	PF3D7_0501200.1-p1	68	PF3D7_0501200.1-p1	| transcript=PF3D7_0501200.1 | gene=PF3D7_0501200 | organism=Plasmodium_falciparum_3D7 | gene_product=parasite-infected erythrocyte surface protein | transcript_product=parasite-infected erythrocyte surface protein | location=Pf3D7_05_v3:64065-65489(+) | protein_length=408 | sequence_SO=chromosome | SO=protein_coding | is_pseudo=false	8	55	55	0	55	29.66	0.002177	3	41	41	0	41	10.78	0.001196	6	54	54	0	54	17.16	0.002403	9	93	93	0	93	25.74	0.003547	408	48721	7.2
69	0	0	0.001022	1	1	PF3D7_0618600.1-p1	70	PF3D7_0618600.1-p1	| transcript=PF3D7_0618600.1 | gene=PF3D7_0618600 | organism=Plasmodium_falciparum_3D7 | gene_product=rhomboid protease ROM10 | transcript_product=rhomboid protease ROM10 | location=Pf3D7_06_v3:775980-777835(-) | protein_length=274 | sequence_SO=chromosome | SO=protein_coding | is_pseudo=false	X	X	X	X	X	X	X	X	X	X	X	X	X	X	X	X	X	X	X	X	X	2	18	18	0	18	10.95	0.001022	274	31340	8.6
70	0.000425	2	0.000984	2	1	PF3D7_1353200.1-p1	71	PF3D7_1353200.1-p1	| transcript=PF3D7_1353200.1 | gene=PF3D7_1353200 | organism=Plasmodium_falciparum_3D7 | gene_product=membrane associated histidine-rich protein 2 | transcript_product=membrane associated histidine-rich protein 2 | location=Pf3D7_13_v3:2130531-2131065(+) | protein_length=137 | sequence_SO=chromosome | SO=protein_coding | is_pseudo=false	2	5	5	0	5	12.41	0.000589	1	3	3	0	3	12.41	0.000261	1	2	2	0	2	12.41	0.000265	2	15	15	0	15	21.9	0.001704	137	15849	7.4
71	0.002656	2	0.00213	2	1	PF3D7_0309600.1-p1	72	PF3D7_0309600.1-p1	| transcript=PF3D7_0309600.1 | gene=PF3D7_0309600 | organism=Plasmodium_falciparum_3D7 | gene_product=60S acidic ribosomal protein P2 | transcript_product=60S acidic ribosomal protein P2 | location=Pf3D7_03_v3:407980-408318(+) | protein_length=112 | sequence_SO=chromosome | SO=protein_coding | is_pseudo=false	2	28	28	0	28	31.25	0.004037	2	12	12	0	12	41.96	0.001275	2	10	10	0	10	31.25	0.001621	2	19	19	0	19	31.25	0.00264	112	11948	4.5
72	0.001261	2	0.001047	2	1	PF3D7_1325100.1-p1	73	PF3D7_1325100.1-p1	| transcript=PF3D7_1325100.1 | gene=PF3D7_1325100 | organism=Plasmodium_falciparum_3D7 | gene_product=phosphoribosylpyrophosphate synthetase | transcript_product=phosphoribosylpyrophosphate synthetase | location=Pf3D7_13_v3:1044552-1045865(-) | protein_length=437 | sequence_SO=chromosome | SO=protein_coding | is_pseudo=false	12	41	41	0	41	33.41	0.001515	16	37	37	0	37	38.67	0.001008	7	17	17	0	17	17.62	0.000706	11	39	39	0	39	29.75	0.001389	437	49383	9.3
74	0.000311	2	0.000195	2	1	PF3D7_1118200.1-p1	75	PF3D7_1118200.1-p1	| transcript=PF3D7_1118200.1 | gene=PF3D7_1118200 | organism=Plasmodium_falciparum_3D7 | gene_product=heat shock protein 90, putative | transcript_product=heat shock protein 90, putative | location=Pf3D7_11_v3:688766-691558(-) | protein_length=930 | sequence_SO=chromosome | SO=protein_coding | is_pseudo=false	5	13	13	0	13	6.67	0.000226	12	31	31	0	31	16.45	0.000397	3	8	8	0	8	3.44	0.000156	5	14	14	0	14	6.67	0.000234	930	108465	6.7
75	0.000115	2	0.000374	2	1	PF3D7_0113900.1-p1	76	PF3D7_0113900.1-p1	| transcript=PF3D7_0113900.1 | gene=PF3D7_0113900 | organism=Plasmodium_falciparum_3D7 | gene_product=CX3CL1-binding protein 1 | transcript_product=CX3CL1-binding protein 1 | location=Pf3D7_01_v3:537109-538025(-) | protein_length=243 | sequence_SO=chromosome | SO=protein_coding | is_pseudo=false	1	2	2	0	2	5.35	0.000133	1	2	2	0	2	5.35	9.8e-05	3	4	4	0	4	15.23	0.000299	5	7	7	0	7	24.69	0.000448	243	28234	8.9
76	7.4e-05	2	0.0001	1	1	PF3D7_1218300.1-p1	77	PF3D7_1218300.1-p1	| transcript=PF3D7_1218300.1 | gene=PF3D7_1218300 | organism=Plasmodium_falciparum_3D7 | gene_product=AP-2 complex subunit mu, putative | transcript_product=AP-2 complex subunit mu, putative | location=Pf3D7_12_v3:717955-719820(+) | protein_length=621 | sequence_SO=chromosome | SO=protein_coding | is_pseudo=false	1	2	2	0	2	3.22	5.2e-05	1	5	5	0	5	3.22	9.58e-05	X	X	X	X	X	X	X	1	4	4	0	4	3.22	0.0001	621	72901	9.5
80	0.000103	2	0.000174	1	1	PF3D7_0517700.1-p1	81	PF3D7_0517700.1-p1	| transcript=PF3D7_0517700.1 | gene=PF3D7_0517700 | organism=Plasmodium_falciparum_3D7 | gene_product=eukaryotic translation initiation factor 3 subunit B, putative | transcript_product=eukaryotic translation initiation factor 3 subunit B, putative | location=Pf3D7_05_v3:743179-745329(+) | protein_length=716 | sequence_SO=chromosome | SO=protein_coding | is_pseudo=false	4	4	4	0	4	6.98	9.02e-05	3	7	7	0	7	8.52	0.000116	X	X	X	X	X	X	X	6	8	8	0	8	18.3	0.000174	716	84057	8.1
81	0.000531	2	0	0	1	PF3D7_1239200.1-p1	82	PF3D7_1239200.1-p1	| transcript=PF3D7_1239200.1 | gene=PF3D7_1239200 | organism=Plasmodium_falciparum_3D7 | gene_product=AP2 domain transcription factor, putative | transcript_product=AP2 domain transcription factor, putative | location=Pf3D7_12_v3:1634695-1642428(+) | protein_length=2577 | sequence_SO=chromosome | SO=protein_coding | is_pseudo=false	10	90	90	0	90	5.94	0.000564	12	108	108	0	108	5.55	0.000499	X	X	X	X	X	X	X	X	X	X	X	X	X	X	2577	299381	6.3
82	0.000303	1	0.000238	1	1	PF3D7_0722400.1-p1	83	PF3D7_0722400.1-p1	| transcript=PF3D7_0722400.1 | gene=PF3D7_0722400 | organism=Plasmodium_falciparum_3D7 | gene_product=Obg-like ATPase 1, putative | transcript_product=Obg-like ATPase 1, putative | location=Pf3D7_07_v3:954784-956343(+) | protein_length=393 | sequence_SO=chromosome | SO=protein_coding | is_pseudo=false	X	X	X	X	X	X	X	1	10	10	0	10	6.87	0.000303	X	X	X	X	X	X	X	1	6	6	0	6	6.87	0.000238	393	45164	7.3
83	0.000122	1	0	0	1	PF3D7_0422700.1-p1	84	PF3D7_0422700.1-p1	| transcript=PF3D7_0422700.1 | gene=PF3D7_0422700 | organism=Plasmodium_falciparum_3D7 | gene_product=eukaryotic initiation factor 4A-III, putative | transcript_product=eukaryotic initiation factor 4A-III, putative | location=Pf3D7_04_v3:1040470-1041642(+) | protein_length=390 | sequence_SO=chromosome | SO=protein_coding | is_pseudo=false	X	X	X	X	X	X	X	2	4	4	0	4	6.15	0.000122	X	X	X	X	X	X	X	X	X	X	X	X	X	X	390	44800	7.6
84	1.2e-05	2	0	0	1	PF3D7_0110500.1-p1	85	PF3D7_0110500.1-p1	| transcript=PF3D7_0110500.1 | gene=PF3D7_0110500 | organism=Plasmodium_falciparum_3D7 | gene_product=bromodomain protein, putative | transcript_product=bromodomain protein, putative | location=Pf3D7_01_v3:396591-403606(+) | protein_length=2285 | sequence_SO=chromosome | SO=protein_coding | is_pseudo=false	1	2	2	0	2	0.44	1.41e-05	2	2	2	0	2	0.88	1.04e-05	X	X	X	X	X	X	X	X	X	X	X	X	X	X	2285	268207	6.2
85	0	0	8.4e-05	1	1	PF3D7_1025300.1-p1	86	PF3D7_1025300.1-p1	| transcript=PF3D7_1025300.1 | gene=PF3D7_1025300 | organism=Plasmodium_falciparum_3D7 | gene_product=conserved protein, unknown function | transcript_product=conserved protein, unknown function | location=Pf3D7_10_v3:1057890-1060658(-) | protein_length=922 | sequence_SO=chromosome | SO=protein_coding | is_pseudo=false	X	X	X	X	X	X	X	X	X	X	X	X	X	X	X	X	X	X	X	X	X	1	5	5	0	5	1.19	8.44e-05	922	109072	8.3
87	7.2e-05	2	0.000116	2	1	PF3D7_1475600.1-p1	88	PF3D7_1475600.1-p1	| transcript=PF3D7_1475600.1 | gene=PF3D7_1475600 | organism=Plasmodium_falciparum_3D7 | gene_product=bromodomain protein, putative | transcript_product=bromodomain protein, putative | location=Pf3D7_14_v3:3112509-3114698(-) | protein_length=729 | sequence_SO=chromosome | SO=protein_coding | is_pseudo=false	1	5	5	0	5	2.19	0.000111	2	2	2	0	2	3.7	3.27e-05	1	5	5	0	5	2.19	0.000125	1	5	5	0	5	2.19	0.000107	729	85803	7.2
90	0.000149	2	0.00038	1	1	PF3D7_1206200.1-p1	91	PF3D7_1206200.1-p1	| transcript=PF3D7_1206200.1 | gene=PF3D7_1206200 | organism=Plasmodium_falciparum_3D7 | gene_product=eukaryotic translation initiation factor 3 subunit C, putative | transcript_product=eukaryotic translation initiation factor 3 subunit C, putative | location=Pf3D7_12_v3:275744-279336(-) | protein_length=984 | sequence_SO=chromosome | SO=protein_coding | is_pseudo=false	5	10	10	0	10	6.3	0.000164	5	11	11	0	11	6.5	0.000133	X	X	X	X	X	X	X	7	24	24	0	24	9.35	0.00038	984	116014	5.4
92	0	0	0	0	1	PF3D7_0802000.1-p1	93	PF3D7_0802000.1-p1	| transcript=PF3D7_0802000.1 | gene=PF3D7_0802000 | organism=Plasmodium_falciparum_3D7 | gene_product=glutamate dehydrogenase, putative | transcript_product=glutamate dehydrogenase, putative | location=Pf3D7_08_v3:146089-150282(+) | protein_length=1397 | sequence_SO=chromosome | SO=protein_coding | is_pseudo=false	X	X	X	X	X	X	X	X	X	X	X	X	X	X	X	X	X	X	X	X	X	X	X	X	X	X	X	X	1397	160425	6.7
93	0	0	0	0	1	PF3D7_1408700.1-p1	94	PF3D7_1408700.1-p1	| transcript=PF3D7_1408700.1 | gene=PF3D7_1408700 | organism=Plasmodium_falciparum_3D7 | gene_product=conserved protein, unknown function | transcript_product=conserved protein, unknown function | location=Pf3D7_14_v3:324754-346468(-) | protein_length=7182 | sequence_SO=chromosome | SO=protein_coding | is_pseudo=false	X	X	X	X	X	X	X	X	X	X	X	X	X	X	X	X	X	X	X	X	X	X	X	X	X	X	X	X	7182	851911	8.7
94	0.000546	2	0.000849	2	1	PF3D7_1431700.1-p1	95	PF3D7_1431700.1-p1	| transcript=PF3D7_1431700.1 | gene=PF3D7_1431700 | organism=Plasmodium_falciparum_3D7 | gene_product=60S ribosomal protein L14, putative | transcript_product=60S ribosomal protein L14, putative | location=Pf3D7_14_v3:1247030-1247950(+) | protein_length=165 | sequence_SO=chromosome | SO=protein_coding | is_pseudo=false	4	6	6	0	6	26.67	0.000587	3	7	7	0	7	19.39	0.000505	3	6	6	0	6	19.39	0.00066	5	11	11	0	11	24.24	0.001037	165	19297	10.2
95	1.2e-05	1	0	0	1	PF3D7_0422500.1-p1	96	PF3D7_0422500.1-p1	| transcript=PF3D7_0422500.1 | gene=PF3D7_0422500 | organism=Plasmodium_falciparum_3D7 | gene_product=pre-mRNA-splicing helicase BRR2, putative | transcript_product=pre-mRNA-splicing helicase BRR2, putative | location=Pf3D7_04_v3:1029329-1037953(+) | protein_length=2874 | sequence_SO=chromosome | SO=protein_coding | is_pseudo=false	X	X	X	X	X	X	X	2	3	3	0	3	1.46	1.24e-05	X	X	X	X	X	X	X	X	X	X	X	X	X	X	2874	337908	5.8
96	0.004098	2	0.002991	2	1	PF3D7_0814000.1-p1	97	PF3D7_0814000.1-p1	| transcript=PF3D7_0814000.1 | gene=PF3D7_0814000 | organism=Plasmodium_falciparum_3D7 | gene_product=60S ribosomal protein L13-2, putative | transcript_product=60S ribosomal protein L13-2, putative | location=Pf3D7_08_v3:680957-681809(+) | protein_length=215 | sequence_SO=chromosome | SO=protein_coding | is_pseudo=false	7	87	87	0	87	27.44	0.006535	4	30	30	0	30	17.21	0.001661	4	10	10	0	10	22.33	0.000844	7	71	71	0	71	27.91	0.005139	215	25441	10.8
97	0.000224	2	8.7e-05	1	1	PF3D7_1022400.1-p1	98	PF3D7_1022400.1-p1	| transcript=PF3D7_1022400.1 | gene=PF3D7_1022400 | organism=Plasmodium_falciparum_3D7 | gene_product=serine/arginine-rich splicing factor 4 | transcript_product=serine/arginine-rich splicing factor 4 | location=Pf3D7_10_v3:939938-942234(-) | protein_length=538 | sequence_SO=chromosome | SO=protein_coding | is_pseudo=false	3	12	12	0	12	8.55	0.00036	1	4	4	0	4	1.86	8.85e-05	X	X	X	X	X	X	X	1	3	3	0	3	1.86	8.68e-05	538	62117	10
100	0.000136	1	0.000178	1	1	PF3D7_1026800.1-p1	101	PF3D7_1026800.1-p1	| transcript=PF3D7_1026800.1 | gene=PF3D7_1026800 | organism=Plasmodium_falciparum_3D7 | gene_product=40S ribosomal protein S2 | transcript_product=40S ribosomal protein S2 | location=Pf3D7_10_v3:1122962-1124037(+) | protein_length=263 | sequence_SO=chromosome | SO=protein_coding | is_pseudo=false	X	X	X	X	X	X	X	2	3	3	0	3	15.97	0.000136	X	X	X	X	X	X	X	2	3	3	0	3	11.41	0.000178	263	29856	6.2
103	6.4e-05	1	0.000112	1	1	PF3D7_0715900.1-p1	104	PF3D7_0715900.1-p1	| transcript=PF3D7_0715900.1 | gene=PF3D7_0715900 | organism=Plasmodium_falciparum_3D7 | gene_product=cation diffusion facilitator family protein, putative | transcript_product=cation diffusion facilitator family protein, putative | location=Pf3D7_07_v3:699239-700909(+) | protein_length=556 | sequence_SO=chromosome | SO=protein_coding | is_pseudo=false	X	X	X	X	X	X	X	1	3	3	0	3	3.06	6.42e-05	X	X	X	X	X	X	X	2	4	4	0	4	5.58	0.000112	556	62944	6.3
105	0	0	0	0	1	PF3D7_1104400.1-p1	106	PF3D7_1104400.1-p1	| transcript=PF3D7_1104400.1 | gene=PF3D7_1104400 | organism=Plasmodium_falciparum_3D7 | gene_product=thioredoxin-like mero protein | transcript_product=thioredoxin-like mero protein | location=Pf3D7_11_v3:196767-198355(+) | protein_length=424 | sequence_SO=chromosome | SO=protein_coding | is_pseudo=false	X	X	X	X	X	X	X	X	X	X	X	X	X	X	X	X	X	X	X	X	X	X	X	X	X	X	X	X	424	49266	9.1
106	0.002986	2	0.005023	2	1	PF3D7_0320900.1-p1	107	PF3D7_0320900.1-p1	| transcript=PF3D7_0320900.1 | gene=PF3D7_0320900 | organism=Plasmodium_falciparum_3D7 | gene_product=histone H2A.Z | transcript_product=histone H2A.Z | location=Pf3D7_03_v3:875213-876295(+) | protein_length=158 | sequence_SO=chromosome | SO=protein_coding | is_pseudo=false	5	44	32	12	40.76	41.77	0.004166	6	26	18	8	23.96	48.1	0.001805	3	54	47	7	53.58	32.91	0.006156	6	41	33	8	39.5	41.77	0.00389	158	16453	10.6
107	0.000314	2	0.001173	2	1	PF3D7_1129100.1-p1	108	PF3D7_1129100.1-p1	| transcript=PF3D7_1129100.1 | gene=PF3D7_1129100 | organism=Plasmodium_falciparum_3D7 | gene_product=parasitophorous vacuolar protein 1 | transcript_product=parasitophorous vacuolar protein 1 | location=Pf3D7_11_v3:1125952-1127310(+) | protein_length=452 | sequence_SO=chromosome | SO=protein_coding | is_pseudo=false	5	8	8	0	8	20.58	0.000286	5	13	13	0	13	21.9	0.000342	8	25	25	0	25	27.65	0.001004	11	39	39	0	39	32.74	0.001343	452	51952	5.1
108	8.2e-05	2	4.6e-05	1	1	PF3D7_1303400.1-p1	109	PF3D7_1303400.1-p1	| transcript=PF3D7_1303400.1 | gene=PF3D7_1303400 | organism=Plasmodium_falciparum_3D7 | gene_product=LisH domain-containing protein, putative | transcript_product=LisH domain-containing protein, putative | location=Pf3D7_13_v3:165013-168081(-) | protein_length=1022 | sequence_SO=chromosome | SO=protein_coding | is_pseudo=false	3	6	6	0	6	2.64	9.48e-05	2	6	6	0	6	3.23	6.99e-05	X	X	X	X	X	X	X	1	3	3	0	3	2.15	4.57e-05	1022	118622	6.1
109	0	0	0.000151	1	1	PF3D7_0221200.1-p1	110	PF3D7_0221200.1-p1	| transcript=PF3D7_0221200.1 | gene=PF3D7_0221200 | organism=Plasmodium_falciparum_3D7 | gene_product=Plasmodium exported protein (hyp15), unknown function | transcript_product=Plasmodium exported protein (hyp15), unknown function | location=Pf3D7_02_v3:854966-855738(+) | protein_length=206 | sequence_SO=chromosome | SO=protein_coding | is_pseudo=false	X	X	X	X	X	X	X	X	X	X	X	X	X	X	X	X	X	X	X	X	X	2	2	2	0	2	7.77	0.000151	206	24621	9.7
110	0	0	0.000631	2	1	PF3D7_0201800.1-p1	111	PF3D7_0201800.1-p1	| transcript=PF3D7_0201800.1 | gene=PF3D7_0201800 | organism=Plasmodium_falciparum_3D7 | gene_product=knob associated heat shock protein 40 | transcript_product=knob associated heat shock protein 40 | location=Pf3D7_02_v3:86832-88791(-) | protein_length=421 | sequence_SO=chromosome | SO=protein_coding | is_pseudo=false	X	X	X	X	X	X	X	X	X	X	X	X	X	X	2	7	7	0	7	11.4	0.000302	4	26	26	0	26	14.01	0.000961	421	48283	8.4
111	0.000883	2	0.000526	2	1	PF3D7_1449500.1-p1	112	PF3D7_1449500.1-p1	| transcript=PF3D7_1449500.1 | gene=PF3D7_1449500 | organism=Plasmodium_falciparum_3D7 | gene_product=AP2 domain transcription factor AP2-O5, putative | transcript_product=AP2 domain transcription factor AP2-O5, putative | location=Pf3D7_14_v3:2031087-2033397(+) | protein_length=715 | sequence_SO=chromosome | SO=protein_coding | is_pseudo=false	11	45	45	0	45	14.69	0.001016	11	45	45	0	45	17.06	0.000749	5	14	14	0	14	6.71	0.000355	6	32	32	0	32	8.67	0.000696	715	84432	7.4
112	7.4e-05	2	0	0	1	PF3D7_0907400.1-p1	113	PF3D7_0907400.1-p1	| transcript=PF3D7_0907400.1 | gene=PF3D7_0907400 | organism=Plasmodium_falciparum_3D7 | gene_product=ATP-dependent protease ATPase subunit ClpY | transcript_product=ATP-dependent protease ATPase subunit ClpY | location=Pf3D7_09_v3:351955-354723(-) | protein_length=922 | sequence_SO=chromosome | SO=protein_coding | is_pseudo=false	3	4	4	0	4	5.42	7.01e-05	2	6	6	0	6	4.34	7.75e-05	X	X	X	X	X	X	X	X	X	X	X	X	X	X	922	106462	8.3
114	0	0	0.00054	2	1	PF3D7_0201900.1-p1	115	PF3D7_0201900.1-p1	| transcript=PF3D7_0201900.1 | gene=PF3D7_0201900 | organism=Plasmodium_falciparum_3D7 | gene_product=erythrocyte membrane protein 3 | transcript_product=erythrocyte membrane protein 3 | location=Pf3D7_02_v3:91318-98838(-) | protein_length=2441 | sequence_SO=chromosome | SO=protein_coding | is_pseudo=false	X	X	X	X	X	X	X	X	X	X	X	X	X	X	16	98	98	0	98	8.32	0.000729	18	55	55	0	55	8.97	0.000351	2441	273646	8.9
115	0	0	4.3e-05	1	1	PF3D7_0906600.1-p1	116	PF3D7_0906600.1-p1	| transcript=PF3D7_0906600.1 | gene=PF3D7_0906600 | organism=Plasmodium_falciparum_3D7 | gene_product=zinc finger protein, putative | transcript_product=zinc finger protein, putative | location=Pf3D7_09_v3:320811-323342(-) | protein_length=843 | sequence_SO=chromosome | SO=protein_coding | is_pseudo=false	X	X	X	X	X	X	X	X	X	X	X	X	X	X	1	2	2	0	2	2.97	4.31e-05	X	X	X	X	X	X	X	843	96861	7.1
116	0.002067	2	0.001144	2	1	PF3D7_1426000.1-p1	118	PF3D7_1426000.1-p1	| transcript=PF3D7_1426000.1 | gene=PF3D7_1426000 | organism=Plasmodium_falciparum_3D7 | gene_product=60S ribosomal protein L21 | transcript_product=60S ribosomal protein L21 | location=Pf3D7_14_v3:1016133-1016618(-) | protein_length=161 | sequence_SO=chromosome | SO=protein_coding | is_pseudo=false	8	25	25	0	25	31.06	0.002508	7	22	22	0	22	38.51	0.001626	3	4	4	0	4	13.66	0.000451	6	19	19	0	19	21.74	0.001836	161	18795	10
117	0.001552	1	0.000338	1	1	PF3D7_0706400.1-p1	119	PF3D7_0706400.1-p1	| transcript=PF3D7_0706400.1 | gene=PF3D7_0706400 | organism=Plasmodium_falciparum_3D7 | gene_product=60S ribosomal protein L37 | transcript_product=60S ribosomal protein L37 | location=Pf3D7_07_v3:306855-307133(-) | protein_length=92 | sequence_SO=chromosome | SO=protein_coding | is_pseudo=false	X	X	X	X	X	X	X	2	12	12	0	12	13.04	0.001552	X	X	X	X	X	X	X	1	2	2	0	2	10.87	0.000338	92	10539	11.5
118	1.7e-05	1	5.7e-05	2	1	PF3D7_1466900.1-p1	120	PF3D7_1466900.1-p1	| transcript=PF3D7_1466900.1 | gene=PF3D7_1466900 | organism=Plasmodium_falciparum_3D7 | gene_product=conserved Plasmodium protein, unknown function | transcript_product=conserved Plasmodium protein, unknown function | location=Pf3D7_14_v3:2736908-2741325(+) | protein_length=1416 | sequence_SO=chromosome | SO=protein_coding | is_pseudo=false	X	X	X	X	X	X	X	2	2	2	0	2	1.98	1.68e-05	1	2	2	0	2	0.78	2.56e-05	4	8	8	0	8	2.9	8.79e-05	1416	169342	4.8
120	0.000431	2	0.000952	2	1	PF3D7_1436300.1-p1	122	PF3D7_1436300.1-p1	| transcript=PF3D7_1436300.1 | gene=PF3D7_1436300 | organism=Plasmodium_falciparum_3D7 | gene_product=translocon component PTEX150 | transcript_product=translocon component PTEX150 | location=Pf3D7_14_v3:1479777-1482758(+) | protein_length=993 | sequence_SO=chromosome | SO=protein_coding | is_pseudo=false	7	28	28	0	28	13.09	0.000455	11	34	34	0	34	17.22	0.000407	15	39	39	0	39	22.76	0.000713	25	76	76	0	76	32.43	0.001191	993	112409	4.4
121	0	0	0	0	1	PF3D7_0506100.1-p1	123	PF3D7_0506100.1-p1	| transcript=PF3D7_0506100.1 | gene=PF3D7_0506100 | organism=Plasmodium_falciparum_3D7 | gene_product=60S ribosomal subunit protein L24, putative | transcript_product=60S ribosomal subunit protein L24, putative | location=Pf3D7_05_v3:257748-258831(-) | protein_length=204 | sequence_SO=chromosome | SO=protein_coding | is_pseudo=false	X	X	X	X	X	X	X	X	X	X	X	X	X	X	X	X	X	X	X	X	X	X	X	X	X	X	X	X	204	24872	9.5
122	0.00062	2	0.000787	2	1	PF3D7_0922200.1-p1	124	PF3D7_0922200.1-p1	| transcript=PF3D7_0922200.1 | gene=PF3D7_0922200 | organism=Plasmodium_falciparum_3D7 | gene_product=S-adenosylmethionine synthetase | transcript_product=S-adenosylmethionine synthetase | location=Pf3D7_09_v3:903362-904570(+) | protein_length=402 | sequence_SO=chromosome | SO=protein_coding | is_pseudo=false	2	8	8	0	8	6.47	0.000321	7	31	31	0	31	25.12	0.000918	3	16	16	0	16	8.71	0.000723	4	22	22	0	22	10.7	0.000852	402	44844	6.7
123	0	0	0	0	1	PF3D7_0219600.1-p1	125	PF3D7_0219600.1-p1	| transcript=PF3D7_0219600.1 | gene=PF3D7_0219600 | organism=Plasmodium_falciparum_3D7 | gene_product=replication factor C subunit 1, putative | transcript_product=replication factor C subunit 1, putative | location=Pf3D7_02_v3:779418-782132(-) | protein_length=904 | sequence_SO=chromosome | SO=protein_coding | is_pseudo=false	X	X	X	X	X	X	X	X	X	X	X	X	X	X	X	X	X	X	X	X	X	X	X	X	X	X	X	X	904	104185	9
125	0.000397	2	0.000361	2	1	PF3D7_0831400.1-p1	127	PF3D7_0831400.1-p1	| transcript=PF3D7_0831400.1 | gene=PF3D7_0831400 | organism=Plasmodium_falciparum_3D7 | gene_product=Plasmodium exported protein, unknown function | transcript_product=Plasmodium exported protein, unknown function | location=Pf3D7_08_v3:1344405-1345487(-) | protein_length=302 | sequence_SO=chromosome | SO=protein_coding | is_pseudo=false	4	6	6	0	6	8.61	0.000321	8	12	12	0	12	19.87	0.000473	3	6	6	0	6	9.6	0.000361	4	7	7	0	7	12.58	0.000361	302	36413	6.1
127	1.2e-05	1	0	0	1	PF3D7_0321800.1-p1	129	PF3D7_0321800.1-p1	| transcript=PF3D7_0321800.1 | gene=PF3D7_0321800 | organism=Plasmodium_falciparum_3D7 | gene_product=WD repeat-containing protein, putative | transcript_product=WD repeat-containing protein, putative | location=Pf3D7_03_v3:912916-921036(+) | protein_length=2706 | sequence_SO=chromosome | SO=protein_coding | is_pseudo=false	2	2	2	0	2	1	1.19e-05	X	X	X	X	X	X	X	X	X	X	X	X	X	X	X	X	X	X	X	X	X	2706	322245	8.7
130	0	0	5.3e-05	2	1	PF3D7_0214800.1-p1	132	PF3D7_0214800.1-p1	| transcript=PF3D7_0214800.1 | gene=PF3D7_0214800 | organism=Plasmodium_falciparum_3D7 | gene_product=conserved Plasmodium membrane protein, unknown function | transcript_product=conserved Plasmodium membrane protein, unknown function | location=Pf3D7_02_v3:605045-609325(+) | protein_length=1371 | sequence_SO=chromosome | SO=protein_coding | is_pseudo=false	X	X	X	X	X	X	X	X	X	X	X	X	X	X	1	2	2	0	2	1.02	2.65e-05	3	7	7	0	7	2.99	7.95e-05	1371	160635	8.4
131	0	0	0	0	1	PF3D7_0519700.1-p1	133	PF3D7_0519700.1-p1	| transcript=PF3D7_0519700.1 | gene=PF3D7_0519700 | organism=Plasmodium_falciparum_3D7 | gene_product=FoP domain-containing protein, putative | transcript_product=FoP domain-containing protein, putative | location=Pf3D7_05_v3:817066-819139(+) | protein_length=192 | sequence_SO=chromosome | SO=protein_coding | is_pseudo=false	X	X	X	X	X	X	X	X	X	X	X	X	X	X	X	X	X	X	X	X	X	X	X	X	X	X	X	X	192	22734	10.8
132	4.4e-05	2	0	0	1	PF3D7_0611400.1-p1	134	PF3D7_0611400.1-p1	| transcript=PF3D7_0611400.1 | gene=PF3D7_0611400 | organism=Plasmodium_falciparum_3D7 | gene_product=SWIB/MDM2 domain-containing protein | transcript_product=SWIB/MDM2 domain-containing protein | location=Pf3D7_06_v3:471658-474150(-) | protein_length=830 | sequence_SO=chromosome | SO=protein_coding | is_pseudo=false	3	3	3	0	3	6.63	5.84e-05	2	2	2	0	2	4.1	2.87e-05	X	X	X	X	X	X	X	X	X	X	X	X	X	X	830	97790	5.1
133	1.3e-05	1	1.9e-05	1	1	PF3D7_0405700.1-p1	135	PF3D7_0405700.1-p1	| transcript=PF3D7_0405700.1 | gene=PF3D7_0405700 | organism=Plasmodium_falciparum_3D7 | gene_product=lysine decarboxylase, putative | transcript_product=lysine decarboxylase, putative | location=Pf3D7_04_v3:305746-312993(-) | protein_length=2415 | sequence_SO=chromosome | SO=protein_coding | is_pseudo=false	1	2	2	0	2	0.37	1.34e-05	X	X	X	X	X	X	X	X	X	X	X	X	X	X	1	3	3	0	3	0.7	1.93e-05	2415	280731	6.6
136	0	0	0.035251	2	1	PF3D7_0202000.1-p1	138	PF3D7_0202000.1-p1	| transcript=PF3D7_0202000.1 | gene=PF3D7_0202000 | organism=Plasmodium_falciparum_3D7 | gene_product=knob-associated histidine-rich protein | transcript_product=knob-associated histidine-rich protein | location=Pf3D7_02_v3:103385-105796(-) | protein_length=654 | sequence_SO=chromosome | SO=protein_coding | is_pseudo=false	X	X	X	X	X	X	X	X	X	X	X	X	X	X	40	853	853	0	853	38.38	0.023678	43	1968	1968	0	1968	50.15	0.046824	654	71303	9.1
137	0.000126	2	0.000157	1	1	PF3D7_0929000.1-p1	139	PF3D7_0929000.1-p1	| transcript=PF3D7_0929000.1 | gene=PF3D7_0929000 | organism=Plasmodium_falciparum_3D7 | gene_product=transcription initiation factor TFIID subunit 7, putative | transcript_product=transcription initiation factor TFIID subunit 7, putative | location=Pf3D7_09_v3:1161080-1162539(+) | protein_length=397 | sequence_SO=chromosome | SO=protein_coding | is_pseudo=false	2	4	4	0	4	10.33	0.000163	2	3	3	0	3	10.33	8.99e-05	X	X	X	X	X	X	X	2	4	4	0	4	10.33	0.000157	397	46799	5.8
138	0	0	0.000164	1	1	PF3D7_1330400.1-p1	140	PF3D7_1330400.1-p1	| transcript=PF3D7_1330400.1 | gene=PF3D7_1330400 | organism=Plasmodium_falciparum_3D7 | gene_product=ER lumen protein retaining receptor 1, putative, unspecified product | transcript_product=ER lumen protein retaining receptor 1, putative | location=Pf3D7_13_v3:1279800-1281285(-) | protein_length=284 | sequence_SO=chromosome | SO=protein_coding | is_pseudo=false	X	X	X	X	X	X	X	X	X	X	X	X	X	X	X	X	X	X	X	X	X	2	3	3	0	3	9.86	0.000164	284	32806	7.3
139	0	0	5.5e-05	1	1	PF3D7_1312700.1-p1	141	PF3D7_1312700.1-p1	| transcript=PF3D7_1312700.1 | gene=PF3D7_1312700 | organism=Plasmodium_falciparum_3D7 | gene_product=conserved Plasmodium protein, unknown function | transcript_product=conserved Plasmodium protein, unknown function | location=Pf3D7_13_v3:532270-533958(-) | protein_length=562 | sequence_SO=chromosome | SO=protein_coding | is_pseudo=false	X	X	X	X	X	X	X	X	X	X	X	X	X	X	X	X	X	X	X	X	X	2	2	2	0	2	3.56	5.54e-05	562	66947	6.7
141	0.001876	2	0.001537	2	1	PF3D7_0415900.1-p1	143	PF3D7_0415900.1-p1	| transcript=PF3D7_0415900.1 | gene=PF3D7_0415900 | organism=Plasmodium_falciparum_3D7 | gene_product=60S ribosomal protein L15, putative | transcript_product=60S ribosomal protein L15, putative | location=Pf3D7_04_v3:697918-698768(-) | protein_length=205 | sequence_SO=chromosome | SO=protein_coding | is_pseudo=false	8	27	27	0	27	32.68	0.002127	7	28	28	0	28	33.17	0.001625	5	9	9	0	9	25.85	0.000797	7	30	30	0	30	28.29	0.002277	205	24134	11.3
142	0	0	0	0	1	PF3D7_0615400.1-p1	144	PF3D7_0615400.1-p1	| transcript=PF3D7_0615400.1 | gene=PF3D7_0615400 | organism=Plasmodium_falciparum_3D7 | gene_product=ribonuclease, putative | transcript_product=ribonuclease, putative | location=Pf3D7_06_v3:630956-640174(-) | protein_length=2729 | sequence_SO=chromosome | SO=protein_coding | is_pseudo=false	X	X	X	X	X	X	X	X	X	X	X	X	X	X	X	X	X	X	X	X	X	X	X	X	X	X	X	X	2729	323200	9.2
143	0.000447	2	0.000355	2	1	PF3D7_0626800.1-p1	145	PF3D7_0626800.1-p1	| transcript=PF3D7_0626800.1 | gene=PF3D7_0626800 | organism=Plasmodium_falciparum_3D7 | gene_product=pyruvate kinase | transcript_product=pyruvate kinase | location=Pf3D7_06_v3:1078995-1081320(+) | protein_length=511 | sequence_SO=chromosome | SO=protein_coding | is_pseudo=false	4	15	15	0	15	14.87	0.000474	8	18	18	0	18	27.4	0.000419	3	8	8	0	8	12.33	0.000284	4	14	14	0	14	11.15	0.000426	511	55661	7.6
144	0.000512	2	0.000318	2	1	PF3D7_0821000.1-p1	146	PF3D7_0821000.1-p1	| transcript=PF3D7_0821000.1 | gene=PF3D7_0821000 | organism=Plasmodium_falciparum_3D7 | gene_product=conserved Plasmodium protein, unknown function | transcript_product=conserved Plasmodium protein, unknown function | location=Pf3D7_08_v3:948745-950899(+) | protein_length=514 | sequence_SO=chromosome | SO=protein_coding | is_pseudo=false	4	9	9	0	9	9.14	0.000283	7	32	32	0	32	17.32	0.000741	2	6	6	0	6	4.67	0.000212	5	14	14	0	14	12.84	0.000424	514	60543	9
145	0.000201	2	0	0	1	PF3D7_1008400.1-p1	147	PF3D7_1008400.1-p1	| transcript=PF3D7_1008400.1 | gene=PF3D7_1008400 | organism=Plasmodium_falciparum_3D7 | gene_product=26S protease regulatory subunit 4, putative | transcript_product=26S protease regulatory subunit 4, putative | location=Pf3D7_10_v3:347206-348667(-) | protein_length=448 | sequence_SO=chromosome | SO=protein_coding | is_pseudo=false	2	6	6	0	6	7.14	0.000216	3	7	7	0	7	10.49	0.000186	X	X	X	X	X	X	X	X	X	X	X	X	X	X	448	49839	7.5
146	0.00086	2	0.00119	2	1	PF3D7_0716800.1-p1	148	PF3D7_0716800.1-p1	| transcript=PF3D7_0716800.1 | gene=PF3D7_0716800 | organism=Plasmodium_falciparum_3D7 | gene_product=eukaryotic translation initiation factor 3 subunit I, putative | transcript_product=eukaryotic translation initiation factor 3 subunit I, putative | location=Pf3D7_07_v3:732070-733496(-) | protein_length=327 | sequence_SO=chromosome | SO=protein_coding | is_pseudo=false	6	12	12	0	12	33.03	0.000593	5	31	31	0	31	25.99	0.001128	4	6	6	0	6	19.57	0.000333	7	43	43	0	43	35.47	0.002046	327	37284	6.9
147	0.000134	2	0.000125	2	1	PF3D7_1328100.1-p1	149	PF3D7_1328100.1-p1	| transcript=PF3D7_1328100.1 | gene=PF3D7_1328100 | organism=Plasmodium_falciparum_3D7 | gene_product=proteasome subunit beta type-7, putative | transcript_product=proteasome subunit beta type-7, putative | location=Pf3D7_13_v3:1184208-1185020(+) | protein_length=270 | sequence_SO=chromosome | SO=protein_coding | is_pseudo=false	1	3	3	0	3	4.44	0.000179	1	2	2	0	2	4.44	8.82e-05	1	2	2	0	2	4.44	0.000134	1	2	2	0	2	4.44	0.000115	270	29962	7.8
148	0.000117	2	0	0	1	PF3D7_1330800.1-p1	150	PF3D7_1330800.1-p1	| transcript=PF3D7_1330800.1 | gene=PF3D7_1330800 | organism=Plasmodium_falciparum_3D7 | gene_product=RNA-binding protein, putative | transcript_product=RNA-binding protein, putative | location=Pf3D7_13_v3:1294615-1296966(+) | protein_length=596 | sequence_SO=chromosome | SO=protein_coding | is_pseudo=false	1	2	2	0	2	2.68	5.42e-05	2	9	9	0	9	5.2	0.00018	X	X	X	X	X	X	X	X	X	X	X	X	X	X	596	68010	5.3
151	0.003013	2	0.001077	2	1	PF3D7_1447000.1-p1	153	PF3D7_1447000.1-p1	| transcript=PF3D7_1447000.1 | gene=PF3D7_1447000 | organism=Plasmodium_falciparum_3D7 | gene_product=40S ribosomal protein S5 | transcript_product=40S ribosomal protein S5 | location=Pf3D7_14_v3:1929931-1931379(+) | protein_length=272 | sequence_SO=chromosome | SO=protein_coding | is_pseudo=false	10	44	44	0	44	46.69	0.002612	9	78	78	0	78	40.07	0.003413	3	16	16	0	16	12.5	0.001068	8	19	19	0	19	36.4	0.001087	272	29958	10
152	0.000902	2	0.003066	2	1	PF3D7_1121600.1-p1	154	PF3D7_1121600.1-p1	| transcript=PF3D7_1121600.1 | gene=PF3D7_1121600 | organism=Plasmodium_falciparum_3D7 | gene_product=exported protein 1 | transcript_product=exported protein 1 | location=Pf3D7_11_v3:815386-816322(-) | protein_length=162 | sequence_SO=chromosome | SO=protein_coding | is_pseudo=false	4	10	10	0	10	18.52	0.000997	6	11	11	0	11	50	0.000808	6	23	23	0	23	50	0.002577	8	37	37	0	37	50	0.003554	162	17296	5.9
154	0.003491	2	0.001526	2	1	PF3D7_0918000.1-p1	156	PF3D7_0918000.1-p1	| transcript=PF3D7_0918000.1 | gene=PF3D7_0918000 | organism=Plasmodium_falciparum_3D7 | gene_product=glideosome-associated protein 50 | transcript_product=glideosome-associated protein 50 | location=Pf3D7_09_v3:742494-743684(-) | protein_length=396 | sequence_SO=chromosome | SO=protein_coding | is_pseudo=false	12	85	85	0	85	33.59	0.003466	15	117	117	0	117	33.59	0.003516	3	10	10	0	10	13.89	0.000458	10	66	66	0	66	33.59	0.002593	396	44604	8.6
156	6.1e-05	1	0	0	1	PF3D7_1238600.1-p1	158	PF3D7_1238600.1-p1	| transcript=PF3D7_1238600.1 | gene=PF3D7_1238600 | organism=Plasmodium_falciparum_3D7 | gene_product=sphingomyelin phosphodiesterase | transcript_product=sphingomyelin phosphodiesterase | location=Pf3D7_12_v3:1601515-1602696(-) | protein_length=393 | sequence_SO=chromosome | SO=protein_coding | is_pseudo=false	X	X	X	X	X	X	X	1	2	2	0	2	2.29	6.06e-05	X	X	X	X	X	X	X	X	X	X	X	X	X	X	393	46013	9
158	0.002171	2	0.002288	2	1	PF3D7_1142600.1-p1	160	PF3D7_1142600.1-p1	| transcript=PF3D7_1142600.1 | gene=PF3D7_1142600 | organism=Plasmodium_falciparum_3D7 | gene_product=60S ribosomal protein L35ae, putative | transcript_product=60S ribosomal protein L35ae, putative | location=Pf3D7_11_v3:1708066-1708679(-) | protein_length=140 | sequence_SO=chromosome | SO=protein_coding | is_pseudo=false	3	17	17	0	17	7.14	0.001961	4	28	28	0	28	12.86	0.00238	1	7	7	0	7	5.71	0.000908	6	33	33	0	33	27.86	0.003668	140	16265	10.5
159	0.000162	2	0.000135	2	1	PF3D7_0910300.1-p1	161	PF3D7_0910300.1-p1	| transcript=PF3D7_0910300.1 | gene=PF3D7_0910300 | organism=Plasmodium_falciparum_3D7 | gene_product=conserved protein, unknown function | transcript_product=conserved protein, unknown function | location=Pf3D7_09_v3:475671-476969(+) | protein_length=432 | sequence_SO=chromosome | SO=protein_coding | is_pseudo=false	1	5	5	0	5	3.94	0.000187	1	5	5	0	5	3.94	0.000138	1	3	3	0	3	3.94	0.000126	1	4	4	0	4	3.94	0.000144	432	51595	8.7
161	0	0	0.00044	1	1	PF3D7_1421000.1-p1	163	PF3D7_1421000.1-p1	| transcript=PF3D7_1421000.1 | gene=PF3D7_1421000 | organism=Plasmodium_falciparum_3D7 | gene_product=DIX domain-containing protein, putative | transcript_product=DIX domain-containing protein, putative | location=Pf3D7_14_v3:867802-868920(-) | protein_length=177 | sequence_SO=chromosome | SO=protein_coding | is_pseudo=false	X	X	X	X	X	X	X	X	X	X	X	X	X	X	X	X	X	X	X	X	X	3	5	5	0	5	18.64	0.00044	177	20734	7.3
163	7.1e-05	1	0	0	1	PF3D7_1237600.1-p1	166	PF3D7_1237600.1-p1	| transcript=PF3D7_1237600.1 | gene=PF3D7_1237600 | organism=Plasmodium_falciparum_3D7 | gene_product=periodic tryptophan protein 1, putative | transcript_product=periodic tryptophan protein 1, putative | location=Pf3D7_12_v3:1568605-1570569(+) | protein_length=502 | sequence_SO=chromosome | SO=protein_coding | is_pseudo=false	X	X	X	X	X	X	X	2	3	3	0	3	5.58	7.11e-05	X	X	X	X	X	X	X	X	X	X	X	X	X	X	502	58798	6.9
164	0.000732	2	0.000623	2	1	PF3D7_0304400.1-p1	167	PF3D7_0304400.1-p1	| transcript=PF3D7_0304400.1 | gene=PF3D7_0304400 | organism=Plasmodium_falciparum_3D7 | gene_product=60S ribosomal protein L44 | transcript_product=60S ribosomal protein L44 | location=Pf3D7_03_v3:217941-218489(+) | protein_length=104 | sequence_SO=chromosome | SO=protein_coding | is_pseudo=false	3	5	5	0	5	13.46	0.000776	3	6	6	0	6	13.46	0.000687	1	2	2	0	2	10.58	0.000349	3	6	6	0	6	13.46	0.000898	104	12157	10.5
165	3e-05	2	0	0	1	PF3D7_0903500.1-p1	168	PF3D7_0903500.1-p1	| transcript=PF3D7_0903500.1 | gene=PF3D7_0903500 | organism=Plasmodium_falciparum_3D7 | gene_product=nucleoporin NUP138, putative | transcript_product=nucleoporin NUP138, putative | location=Pf3D7_09_v3:162769-166923(+) | protein_length=1384 | sequence_SO=chromosome | SO=protein_coding | is_pseudo=false	1	3	3	0	3	1.37	3.5e-05	1	3	3	0	3	1.37	2.58e-05	X	X	X	X	X	X	X	X	X	X	X	X	X	X	1384	155151	6
167	0	0	0	0	1	PF3D7_0614900.1-p1	170	PF3D7_0614900.1-p1	| transcript=PF3D7_0614900.1 | gene=PF3D7_0614900 | organism=Plasmodium_falciparum_3D7 | gene_product=conserved Plasmodium membrane protein, unknown function | transcript_product=conserved Plasmodium membrane protein, unknown function | location=Pf3D7_06_v3:617762-621536(+) | protein_length=1096 | sequence_SO=chromosome | SO=protein_coding | is_pseudo=false	X	X	X	X	X	X	X	X	X	X	X	X	X	X	X	X	X	X	X	X	X	X	X	X	X	X	X	X	1096	130934	9.7
168	0.000708	2	0.000736	2	1	PF3D7_0416800.1-p1	171	PF3D7_0416800.1-p1	| transcript=PF3D7_0416800.1 | gene=PF3D7_0416800 | organism=Plasmodium_falciparum_3D7 | gene_product=small GTP-binding protein sar1 | transcript_product=small GTP-binding protein sar1 | location=Pf3D7_04_v3:729962-731223(+) | protein_length=192 | sequence_SO=chromosome | SO=protein_coding | is_pseudo=false	1	8	8	0	8	9.9	0.000673	6	12	12	0	12	49.48	0.000744	2	7	7	0	7	15.63	0.000662	3	10	10	0	10	25.52	0.00081	192	22020	7.3
169	0.006832	2	0.005332	2	1	PF3D7_1006200.1-p1	172	PF3D7_1006200.1-p1	| transcript=PF3D7_1006200.1 | gene=PF3D7_1006200 | organism=Plasmodium_falciparum_3D7 | gene_product=DNA/RNA-binding protein Alba 3 | transcript_product=DNA/RNA-binding protein Alba 3 | location=Pf3D7_10_v3:262150-262997(-) | protein_length=107 | sequence_SO=chromosome | SO=protein_coding | is_pseudo=false	7	50	50	0	50	57.01	0.007547	8	55	55	0	55	67.29	0.006117	8	26	26	0	26	66.36	0.004411	6	43	43	0	43	50.47	0.006253	107	11977	9.3
171	0.000777	2	0.000329	2	1	PF3D7_1203700.1-p1	174	PF3D7_1203700.1-p1	| transcript=PF3D7_1203700.1 | gene=PF3D7_1203700 | organism=Plasmodium_falciparum_3D7 | gene_product=nucleosome assembly protein | transcript_product=nucleosome assembly protein | location=Pf3D7_12_v3:187146-188842(-) | protein_length=347 | sequence_SO=chromosome | SO=protein_coding | is_pseudo=false	5	12	12	0	12	15.85	0.000558	7	29	29	0	29	21.61	0.000995	2	4	4	0	4	6.63	0.000209	5	10	10	0	10	22.77	0.000448	347	40488	4.9
172	0.000127	2	0.000178	1	1	PF3D7_1111100.1-p1	175	PF3D7_1111100.1-p1	| transcript=PF3D7_1111100.1 | gene=PF3D7_1111100 | organism=Plasmodium_falciparum_3D7 | gene_product=replication factor C subunit 5, putative | transcript_product=replication factor C subunit 5, putative | location=Pf3D7_11_v3:437171-438220(-) | protein_length=349 | sequence_SO=chromosome | SO=protein_coding | is_pseudo=false	2	4	4	0	4	7.74	0.000185	2	2	2	0	2	8.02	6.82e-05	X	X	X	X	X	X	X	2	4	4	0	4	7.74	0.000178	349	40347	8.8
174	0.000309	1	0.001042	1	1	PF3D7_1315600.1-p1	177	PF3D7_1315600.1-p1	| transcript=PF3D7_1315600.1 | gene=PF3D7_1315600 | organism=Plasmodium_falciparum_3D7 | gene_product=CDP-diacylglycerol--inositol 3-phosphatidyltransferase | transcript_product=CDP-diacylglycerol--inositol 3-phosphatidyltransferase | location=Pf3D7_13_v3:655207-657259(-) | protein_length=209 | sequence_SO=chromosome | SO=protein_coding | is_pseudo=false	1	4	4	0	4	6.22	0.000309	X	X	X	X	X	X	X	X	X	X	X	X	X	X	1	14	14	0	14	6.22	0.001042	209	23925	9.4
175	0	0	0.000322	1	1	PF3D7_0819500.1-p1	178	PF3D7_0819500.1-p1	| transcript=PF3D7_0819500.1 | gene=PF3D7_0819500 | organism=Plasmodium_falciparum_3D7 | gene_product=conserved protein, unknown function | transcript_product=conserved protein, unknown function | location=Pf3D7_08_v3:881590-884390(+) | protein_length=386 | sequence_SO=chromosome | SO=protein_coding | is_pseudo=false	X	X	X	X	X	X	X	X	X	X	X	X	X	X	X	X	X	X	X	X	X	2	8	8	0	8	4.92	0.000323	386	45683	5.8
176	3.3e-05	2	1.7e-05	1	2	PF3D7_1128000.1-p1;PF3D7_1128000.2-p1	179	PF3D7_1128000.1-p1	0 genes:. 2 proteins in this group did not match any genes. PF3D7_1128000.1-p1:| transcript=PF3D7_1128000.1 | gene=PF3D7_1128000 | organism=Plasmodium_falciparum_3D7 | gene_product=conserved Plasmodium protein, unknown function | transcript_product=conserved Plasmodium protein, unknown function | location=Pf3D7_11_v3:1087314-1093105(+) | protein_length=1789 | sequence_SO=chromosome | SO=protein_c…	2	5	5	0	5	1.29	4.51e-05	2	3	3	0	3	2.24	2e-05	X	X	X	X	X	X	X	1	2	2	0	2	1.23	1.74e-05	1789	212864	6.2
177	0.0003	2	0.000301	1	1	PF3D7_1419200.1-p1	180	PF3D7_1419200.1-p1	| transcript=PF3D7_1419200.1 | gene=PF3D7_1419200 | organism=Plasmodium_falciparum_3D7 | gene_product=thioredoxin-like protein, putative | transcript_product=thioredoxin-like protein, putative | location=Pf3D7_14_v3:797709-800135(-) | protein_length=671 | sequence_SO=chromosome | SO=protein_coding | is_pseudo=false	1	8	8	0	8	1.34	0.000193	3	23	23	0	23	7.6	0.000408	X	X	X	X	X	X	X	1	13	13	0	13	1.34	0.000301	671	80239	9.5
178	0.000355	2	0.000582	2	1	PF3D7_1129000.1-p1	181	PF3D7_1129000.1-p1	| transcript=PF3D7_1129000.1 | gene=PF3D7_1129000 | organism=Plasmodium_falciparum_3D7 | gene_product=spermidine synthase | transcript_product=spermidine synthase | location=Pf3D7_11_v3:1121930-1123377(+) | protein_length=321 | sequence_SO=chromosome | SO=protein_coding | is_pseudo=false	4	6	6	0	6	14.64	0.000302	6	11	11	0	11	19.94	0.000408	3	6	6	0	6	11.21	0.000339	4	17	17	0	17	14.64	0.000824	321	36596	7.7
179	0.000214	2	0.001158	2	1	PF3D7_0401800.1-p1	182	PF3D7_0401800.1-p1	| transcript=PF3D7_0401800.1 | gene=PF3D7_0401800 | organism=Plasmodium_falciparum_3D7 | gene_product=Plasmodium exported protein (PHISTb), unknown function | transcript_product=Plasmodium exported protein (PHISTb), unknown function | location=Pf3D7_04_v3:103742-105603(-) | protein_length=560 | sequence_SO=chromosome | SO=protein_coding | is_pseudo=false	3	6	6	0	6	5.18	0.000173	8	12	12	0	12	13.93	0.000255	4	8	8	0	8	9.29	0.000259	14	74	74	0	74	25.89	0.002056	560	60270	8.6
181	3.2e-05	2	0	0	1	PF3D7_1148000.1-p1	184	PF3D7_1148000.1-p1	| transcript=PF3D7_1148000.1 | gene=PF3D7_1148000 | organism=Plasmodium_falciparum_3D7 | gene_product=serine/threonine protein kinase, putative | transcript_product=serine/threonine protein kinase, putative | location=Pf3D7_11_v3:1909210-1913499(-) | protein_length=1429 | sequence_SO=chromosome | SO=protein_coding | is_pseudo=false	1	2	2	0	2	0.98	2.26e-05	2	5	5	0	5	1.12	4.16e-05	X	X	X	X	X	X	X	X	X	X	X	X	X	X	1429	170704	8.9
183	0.000239	2	0	0	1	PF3D7_0923000.1-p1	186	PF3D7_0923000.1-p1	| transcript=PF3D7_0923000.1 | gene=PF3D7_0923000 | organism=Plasmodium_falciparum_3D7 | gene_product=DNA-directed RNA polymerase II subunit RPB3, putative | transcript_product=DNA-directed RNA polymerase II subunit RPB3, putative | location=Pf3D7_09_v3:939580-940587(-) | protein_length=335 | sequence_SO=chromosome | SO=protein_coding | is_pseudo=false	1	4	4	0	4	9.25	0.000193	4	8	8	0	8	14.33	0.000284	X	X	X	X	X	X	X	X	X	X	X	X	X	X	335	38346	6.5
184	0.002321	2	0.001682	2	1	PF3D7_0919000.1-p1	187	PF3D7_0919000.1-p1	| transcript=PF3D7_0919000.1 | gene=PF3D7_0919000 | organism=Plasmodium_falciparum_3D7 | gene_product=nucleosome assembly protein | transcript_product=nucleosome assembly protein | location=Pf3D7_09_v3:781368-782675(-) | protein_length=269 | sequence_SO=chromosome | SO=protein_coding | is_pseudo=false	7	39	39	0	39	34.94	0.002341	10	52	52	0	52	46.84	0.002301	4	13	13	0	13	26.02	0.000877	7	43	43	0	43	38.66	0.002487	269	31826	4.4
185	1.8e-05	1	0	0	1	PF3D7_1309400.1-p1	188	PF3D7_1309400.1-p1	| transcript=PF3D7_1309400.1 | gene=PF3D7_1309400 | organism=Plasmodium_falciparum_3D7 | gene_product=HORMA domain protein, putative | transcript_product=HORMA domain protein, putative | location=Pf3D7_13_v3:431892-435875(+) | protein_length=1327 | sequence_SO=chromosome | SO=protein_coding | is_pseudo=false	X	X	X	X	X	X	X	2	2	2	0	2	2.03	1.79e-05	X	X	X	X	X	X	X	X	X	X	X	X	X	X	1327	158122	6.3
186	5.8e-05	2	7e-05	2	1	PF3D7_1116400.1-p1	189	PF3D7_1116400.1-p1	| transcript=PF3D7_1116400.1 | gene=PF3D7_1116400 | organism=Plasmodium_falciparum_3D7 | gene_product=guanine nucleotide-exchange factor SEC12 | transcript_product=guanine nucleotide-exchange factor SEC12 | location=Pf3D7_11_v3:619893-621350(-) | protein_length=485 | sequence_SO=chromosome | SO=protein_coding | is_pseudo=false	1	2	2	0	2	2.47	6.66e-05	1	2	2	0	2	2.47	4.91e-05	1	2	2	0	2	2.47	7.49e-05	1	2	2	0	2	2.47	6.42e-05	485	56531	8
187	0	0	0	0	1	PF3D7_1241700.1-p1	190	PF3D7_1241700.1-p1	| transcript=PF3D7_1241700.1 | gene=PF3D7_1241700 | organism=Plasmodium_falciparum_3D7 | gene_product=replication factor C subunit 4, putative | transcript_product=replication factor C subunit 4, putative | location=Pf3D7_12_v3:1778154-1779411(+) | protein_length=336 | sequence_SO=chromosome | SO=protein_coding | is_pseudo=false	X	X	X	X	X	X	X	X	X	X	X	X	X	X	X	X	X	X	X	X	X	X	X	X	X	X	X	X	336	37638	7.3
189	0	0	0	0	1	PF3D7_1448400.1-p1	192	PF3D7_1448400.1-p1	| transcript=PF3D7_1448400.1 | gene=PF3D7_1448400 | organism=Plasmodium_falciparum_3D7 | gene_product=ubiquitin-protein ligase, putative | transcript_product=ubiquitin-protein ligase, putative | location=Pf3D7_14_v3:1980319-1983107(-) | protein_length=851 | sequence_SO=chromosome | SO=protein_coding | is_pseudo=false	X	X	X	X	X	X	X	X	X	X	X	X	X	X	X	X	X	X	X	X	X	X	X	X	X	X	X	X	851	100446	8.9
190	0.000131	1	0.000252	1	1	PF3D7_0919100.1-p1	193	PF3D7_0919100.1-p1	| transcript=PF3D7_0919100.1 | gene=PF3D7_0919100 | organism=Plasmodium_falciparum_3D7 | gene_product=DnaJ protein, putative | transcript_product=DnaJ protein, putative | location=Pf3D7_09_v3:786156-788212(+) | protein_length=370 | sequence_SO=chromosome | SO=protein_coding | is_pseudo=false	1	3	3	0	3	5.95	0.000131	X	X	X	X	X	X	X	X	X	X	X	X	X	X	3	6	6	0	6	14.32	0.000252	370	43260	8.7
192	0.001165	2	0.000945	2	1	PF3D7_0210000.1-p1	195	PF3D7_0210000.1-p1	| transcript=PF3D7_0210000.1 | gene=PF3D7_0210000 | organism=Plasmodium_falciparum_3D7 | gene_product=secretory complex protein 61 gamma subunit | transcript_product=secretory complex protein 61 gamma subunit | location=Pf3D7_02_v3:409983-410228(+) | protein_length=81 | sequence_SO=chromosome | SO=protein_coding | is_pseudo=false	1	8	8	0	8	34.57	0.001595	2	5	5	0	5	44.44	0.000735	1	5	5	0	5	34.57	0.001121	1	4	4	0	4	34.57	0.000768	81	9286	8.3
195	0	0	0	0	1	PF3D7_1305300.1-p1	198	PF3D7_1305300.1-p1	| transcript=PF3D7_1305300.1 | gene=PF3D7_1305300 | organism=Plasmodium_falciparum_3D7 | gene_product=conserved Plasmodium protein, unknown function | transcript_product=conserved Plasmodium protein, unknown function | location=Pf3D7_13_v3:256430-267182(-) | protein_length=3525 | sequence_SO=chromosome | SO=protein_coding | is_pseudo=false	X	X	X	X	X	X	X	X	X	X	X	X	X	X	X	X	X	X	X	X	X	X	X	X	X	X	X	X	3525	418583	7.1
196	0.000114	1	0	0	1	PF3D7_0217500.1-p1	199	PF3D7_0217500.1-p1	| transcript=PF3D7_0217500.1 | gene=PF3D7_0217500 | organism=Plasmodium_falciparum_3D7 | gene_product=calcium-dependent protein kinase 1 | transcript_product=calcium-dependent protein kinase 1 | location=Pf3D7_02_v3:720437-722661(+) | protein_length=524 | sequence_SO=chromosome | SO=protein_coding | is_pseudo=false	X	X	X	X	X	X	X	2	5	5	0	5	6.3	0.000114	X	X	X	X	X	X	X	X	X	X	X	X	X	X	524	60800	7.6
199	0.00152	2	0.000729	2	1	PF3D7_0823800.1-p1	202	PF3D7_0823800.1-p1	| transcript=PF3D7_0823800.1 | gene=PF3D7_0823800 | organism=Plasmodium_falciparum_3D7 | gene_product=DnaJ protein, putative | transcript_product=DnaJ protein, putative | location=Pf3D7_08_v3:1043813-1045780(+) | protein_length=655 | sequence_SO=chromosome | SO=protein_coding | is_pseudo=false	11	85	85	0	85	23.66	0.002096	13	52	52	0	52	24.89	0.000945	4	26	26	0	26	10.08	0.000721	8	31	31	0	31	17.25	0.000736	655	76682	9.2
200	1.3e-05	2	0	0	1	PF3D7_0609000.1-p1	203	PF3D7_0609000.1-p1	| transcript=PF3D7_0609000.1 | gene=PF3D7_0609000 | organism=Plasmodium_falciparum_3D7 | gene_product=nucleoporin NUP637, putative | transcript_product=nucleoporin NUP637, putative | location=Pf3D7_06_v3:370261-388494(+) | protein_length=6077 | sequence_SO=chromosome | SO=protein_coding | is_pseudo=false	4	8	8	0	8	0.89	2.13e-05	2	2	2	0	2	0.43	3.92e-06	X	X	X	X	X	X	X	X	X	X	X	X	X	X	6077	720533	7
201	3.3e-05	1	2.1e-05	2	1	PF3D7_0317300.1-p1	204	PF3D7_0317300.1-p1	| transcript=PF3D7_0317300.1 | gene=PF3D7_0317300 | organism=Plasmodium_falciparum_3D7 | gene_product=conserved Plasmodium protein, unknown function | transcript_product=conserved Plasmodium protein, unknown function | location=Pf3D7_03_v3:699544-709728(-) | protein_length=3394 | sequence_SO=chromosome | SO=protein_coding | is_pseudo=false	3	7	7	0	7	1.03	3.33e-05	X	X	X	X	X	X	X	1	2	2	0	2	0.32	1.07e-05	4	7	7	0	7	1.15	3.21e-05	3394	402951	4.8
204	0	0	0	0	1	PF3D7_0927200.1-p1	207	PF3D7_0927200.1-p1	| transcript=PF3D7_0927200.1 | gene=PF3D7_0927200 | organism=Plasmodium_falciparum_3D7 | gene_product=zinc finger protein, putative | transcript_product=zinc finger protein, putative | location=Pf3D7_09_v3:1107143-1112656(+) | protein_length=1627 | sequence_SO=chromosome | SO=protein_coding | is_pseudo=false	X	X	X	X	X	X	X	X	X	X	X	X	X	X	X	X	X	X	X	X	X	X	X	X	X	X	X	X	1627	189700	5.9
206	0	0	0	0	1	PF3D7_1124900.1-p1	209	PF3D7_1124900.1-p1	| transcript=PF3D7_1124900.1 | gene=PF3D7_1124900 | organism=Plasmodium_falciparum_3D7 | gene_product=60S ribosomal protein L35, putative | transcript_product=60S ribosomal protein L35, putative | location=Pf3D7_11_v3:981945-983086(+) | protein_length=124 | sequence_SO=chromosome | SO=protein_coding | is_pseudo=false	X	X	X	X	X	X	X	X	X	X	X	X	X	X	X	X	X	X	X	X	X	X	X	X	X	X	X	X	124	14748	10.8
209	1.3e-05	2	0	0	1	PF3D7_0506500.1-p1	212	PF3D7_0506500.1-p1	| transcript=PF3D7_0506500.1 | gene=PF3D7_0506500 | organism=Plasmodium_falciparum_3D7 | gene_product=conserved Plasmodium protein, unknown function | transcript_product=conserved Plasmodium protein, unknown function | location=Pf3D7_05_v3:265595-278345(+) | protein_length=3980 | sequence_SO=chromosome | SO=protein_coding | is_pseudo=false	3	4	4	0	4	0.68	1.62e-05	2	3	3	0	3	0.6	8.97e-06	X	X	X	X	X	X	X	X	X	X	X	X	X	X	3980	469876	7.7
210	0.00245	2	0.001422	2	1	PF3D7_0806800.1-p1	213	PF3D7_0806800.1-p1	| transcript=PF3D7_0806800.1 | gene=PF3D7_0806800 | organism=Plasmodium_falciparum_3D7 | gene_product=V-type proton ATPase subunit a, putative | transcript_product=V-type proton ATPase subunit a, putative | location=Pf3D7_08_v3:363260-366421(-) | protein_length=1053 | sequence_SO=chromosome | SO=protein_coding | is_pseudo=false	7	136	136	0	136	8.45	0.002086	14	249	249	0	249	15.86	0.002814	9	39	39	0	39	9.88	0.000672	18	147	147	0	147	19.37	0.002172	1053	122999	7.1
211	2.1e-05	1	4.5e-05	2	1	PF3D7_0811200.1-p1	214	PF3D7_0811200.1-p1	| transcript=PF3D7_0811200.1 | gene=PF3D7_0811200 | organism=Plasmodium_falciparum_3D7 | gene_product=ER membrane protein complex subunit 1, putative | transcript_product=ER membrane protein complex subunit 1, putative | location=Pf3D7_08_v3:560744-564276(+) | protein_length=1133 | sequence_SO=chromosome | SO=protein_coding | is_pseudo=false	X	X	X	X	X	X	X	2	2	2	0	2	3.35	2.1e-05	2	3	3	0	3	3.71	4.81e-05	1	3	3	0	3	1.41	4.12e-05	1133	133758	9.1
214	0.000286	1	0.000386	1	1	PF3D7_1418000.1-p1	217	PF3D7_1418000.1-p1	| transcript=PF3D7_1418000.1 | gene=PF3D7_1418000 | organism=Plasmodium_falciparum_3D7 | gene_product=ubiquitin fusion degradation protein 1, putative | transcript_product=ubiquitin fusion degradation protein 1, putative | location=Pf3D7_14_v3:759360-761422(-) | protein_length=282 | sequence_SO=chromosome | SO=protein_coding | is_pseudo=false	1	5	5	0	5	6.38	0.000286	X	X	X	X	X	X	X	X	X	X	X	X	X	X	2	7	7	0	7	16.31	0.000386	282	32478	6.6
215	0.000292	2	0.000181	2	1	PF3D7_0826700.1-p1	218	PF3D7_0826700.1-p1	| transcript=PF3D7_0826700.1 | gene=PF3D7_0826700 | organism=Plasmodium_falciparum_3D7 | gene_product=receptor for activated c kinase | transcript_product=receptor for activated c kinase | location=Pf3D7_08_v3:1160164-1161708(-) | protein_length=323 | sequence_SO=chromosome | SO=protein_coding | is_pseudo=false	3	8	8	0	8	11.15	0.0004	3	5	5	0	5	11.15	0.000184	2	3	3	0	3	8.36	0.000169	2	4	4	0	4	8.05	0.000193	323	35686	6.7
217	0.000226	1	0	0	1	PF3D7_1312600.1-p1	220	PF3D7_1312600.1-p1	| transcript=PF3D7_1312600.1 | gene=PF3D7_1312600 | organism=Plasmodium_falciparum_3D7 | gene_product=2-oxoisovalerate dehydrogenase subunit alpha, mitochondrial, putative | transcript_product=2-oxoisovalerate dehydrogenase subunit alpha, mitochondrial, putative | location=Pf3D7_13_v3:529976-531265(+) | protein_length=429 | sequence_SO=chromosome | SO=protein_coding | is_pseudo=false	2	6	6	0	6	9.79	0.000226	X	X	X	X	X	X	X	X	X	X	X	X	X	X	X	X	X	X	X	X	X	429	49871	7.5
219	2.8e-05	1	0	0	1	PF3D7_0303200.1-p1	222	PF3D7_0303200.1-p1	| transcript=PF3D7_0303200.1 | gene=PF3D7_0303200 | organism=Plasmodium_falciparum_3D7 | gene_product=HAD superfamily protein, putative | transcript_product=HAD superfamily protein, putative | location=Pf3D7_03_v3:169571-174300(+) | protein_length=1162 | sequence_SO=chromosome | SO=protein_coding | is_pseudo=false	1	2	2	0	2	1.89	2.78e-05	X	X	X	X	X	X	X	X	X	X	X	X	X	X	X	X	X	X	X	X	X	1162	134738	9
221	0	0	0	0	1	PF3D7_0314100.1-p1	224	PF3D7_0314100.1-p1	| transcript=PF3D7_0314100.1 | gene=PF3D7_0314100 | organism=Plasmodium_falciparum_3D7 | gene_product=vesicle transport v-SNARE protein, putative | transcript_product=vesicle transport v-SNARE protein, putative | location=Pf3D7_03_v3:569308-571051(-) | protein_length=198 | sequence_SO=chromosome | SO=protein_coding | is_pseudo=false	X	X	X	X	X	X	X	X	X	X	X	X	X	X	X	X	X	X	X	X	X	X	X	X	X	X	X	X	198	23774	9
223	1.7e-05	2	0	0	1	PF3D7_1433400.1-p1	226	PF3D7_1433400.1-p1	| transcript=PF3D7_1433400.1 | gene=PF3D7_1433400 | organism=Plasmodium_falciparum_3D7 | gene_product=zinc finger protein, putative | transcript_product=zinc finger protein, putative | location=Pf3D7_14_v3:1312304-1329577(-) | protein_length=5757 | sequence_SO=chromosome | SO=protein_coding | is_pseudo=false	1	3	3	0	3	0.28	8.42e-06	3	12	12	0	12	0.4	2.48e-05	X	X	X	X	X	X	X	X	X	X	X	X	X	X	5757	682471	8.7
224	0	0	0	0	1	PF3D7_0711500.1-p1	227	PF3D7_0711500.1-p1	| transcript=PF3D7_0711500.1 | gene=PF3D7_0711500 | organism=Plasmodium_falciparum_3D7 | gene_product=regulator of chromosome condensation, putative | transcript_product=regulator of chromosome condensation, putative | location=Pf3D7_07_v3:505245-507311(+) | protein_length=688 | sequence_SO=chromosome | SO=protein_coding | is_pseudo=false	X	X	X	X	X	X	X	X	X	X	X	X	X	X	X	X	X	X	X	X	X	X	X	X	X	X	X	X	688	78897	6.9
225	0	0	0	0	1	PF3D7_0706000.1-p1	228	PF3D7_0706000.1-p1	| transcript=PF3D7_0706000.1 | gene=PF3D7_0706000 | organism=Plasmodium_falciparum_3D7 | gene_product=importin-7, putative | transcript_product=importin-7, putative | location=Pf3D7_07_v3:293400-297089(+) | protein_length=1229 | sequence_SO=chromosome | SO=protein_coding | is_pseudo=false	X	X	X	X	X	X	X	X	X	X	X	X	X	X	X	X	X	X	X	X	X	X	X	X	X	X	X	X	1229	145508	5.3
227	0.000419	2	0.000962	1	1	PF3D7_0707400.1-p1	230	PF3D7_0707400.1-p1	| transcript=PF3D7_0707400.1 | gene=PF3D7_0707400 | organism=Plasmodium_falciparum_3D7 | gene_product=AAA family ATPase, putative | transcript_product=AAA family ATPase, putative | location=Pf3D7_07_v3:343912-345903(+) | protein_length=663 | sequence_SO=chromosome | SO=protein_coding | is_pseudo=false	2	16	16	0	16	3.32	0.00039	4	25	25	0	25	6.33	0.000449	X	X	X	X	X	X	X	3	41	41	0	41	4.83	0.000962	663	78187	9.4
229	2.4e-05	2	8.3e-05	2	1	PF3D7_0720700.1-p1	232	PF3D7_0720700.1-p1	| transcript=PF3D7_0720700.1 | gene=PF3D7_0720700 | organism=Plasmodium_falciparum_3D7 | gene_product=phosphoinositide-binding protein, putative | transcript_product=phosphoinositide-binding protein, putative | location=Pf3D7_07_v3:891683-899051(+) | protein_length=2166 | sequence_SO=chromosome | SO=protein_coding | is_pseudo=false	2	2	2	0	2	1.52	1.49e-05	4	6	6	0	6	1.99	3.3e-05	5	7	7	0	7	3.05	5.87e-05	10	15	15	0	15	5.82	0.000108	2166	258425	6.8
230	0.000464	2	0.000594	2	1	PF3D7_0930300.1-p1	233	PF3D7_0930300.1-p1	| transcript=PF3D7_0930300.1 | gene=PF3D7_0930300 | organism=Plasmodium_falciparum_3D7 | gene_product=merozoite surface protein 1 | transcript_product=merozoite surface protein 1 | location=Pf3D7_09_v3:1201812-1206974(+) | protein_length=1720 | sequence_SO=chromosome | SO=protein_coding | is_pseudo=false	15	59	59	0	59	14.13	0.000554	15	54	54	0	54	14.53	0.000374	12	32	32	0	32	10.35	0.000338	16	94	94	0	94	15	0.00085	1720	195725	6.5
234	4.7e-05	2	0	0	1	PF3D7_0624600.1-p1	237	PF3D7_0624600.1-p1	| transcript=PF3D7_0624600.1 | gene=PF3D7_0624600 | organism=Plasmodium_falciparum_3D7 | gene_product=SNF2 helicase, putative | transcript_product=SNF2 helicase, putative | location=Pf3D7_06_v3:999524-1007683(+) | protein_length=2719 | sequence_SO=chromosome | SO=protein_coding | is_pseudo=false	4	7	7	0	7	1.73	4.16e-05	5	12	12	0	12	2.39	5.25e-05	X	X	X	X	X	X	X	X	X	X	X	X	X	X	2719	315620	7
235	3.7e-05	1	0	0	1	PF3D7_1405800.1-p1	238	PF3D7_1405800.1-p1	| transcript=PF3D7_1405800.1 | gene=PF3D7_1405800 | organism=Plasmodium_falciparum_3D7 | gene_product=ribosome biogenesis protein BOP1, putative | transcript_product=ribosome biogenesis protein BOP1, putative | location=Pf3D7_14_v3:200493-204143(-) | protein_length=966 | sequence_SO=chromosome | SO=protein_coding | is_pseudo=false	X	X	X	X	X	X	X	2	3	3	0	3	3.52	3.7e-05	X	X	X	X	X	X	X	X	X	X	X	X	X	X	966	114239	7
236	0.000369	2	0.000736	2	1	PF3D7_1105800.1-p1	239	PF3D7_1105800.1-p1	| transcript=PF3D7_1105800.1 | gene=PF3D7_1105800 | organism=Plasmodium_falciparum_3D7 | gene_product=conserved Apicomplexan protein, unknown function | transcript_product=conserved Apicomplexan protein, unknown function | location=Pf3D7_11_v3:250918-252872(+) | protein_length=266 | sequence_SO=chromosome | SO=protein_coding | is_pseudo=false	3	7	7	0	7	9.77	0.000425	4	7	7	0	7	15.04	0.000313	4	7	7	0	7	13.91	0.000478	9	17	17	0	17	35.71	0.000994	266	30661	5.1
237	0	0	0.000212	2	1	PF3D7_0402000.1-p1	240	PF3D7_0402000.1-p1	| transcript=PF3D7_0402000.1 | gene=PF3D7_0402000 | organism=Plasmodium_falciparum_3D7 | gene_product=Plasmodium exported protein (PHISTa), unknown function | transcript_product=Plasmodium exported protein (PHISTa), unknown function | location=Pf3D7_04_v3:114601-116058(-) | protein_length=428 | sequence_SO=chromosome | SO=protein_coding | is_pseudo=false	X	X	X	X	X	X	X	X	X	X	X	X	X	X	2	4	4	0	4	6.78	0.00017	3	7	7	0	7	7.01	0.000254	428	49743	9.5
238	0.000227	2	0.000111	2	1	PF3D7_1222300.1-p1	241	PF3D7_1222300.1-p1	| transcript=PF3D7_1222300.1 | gene=PF3D7_1222300 | organism=Plasmodium_falciparum_3D7 | gene_product=endoplasmin, putative | transcript_product=endoplasmin, putative | location=Pf3D7_12_v3:883567-886032(-) | protein_length=821 | sequence_SO=chromosome | SO=protein_coding | is_pseudo=false	4	12	12	0	12	7.55	0.000236	8	15	15	0	15	14.13	0.000217	3	4	4	0	4	4.87	8.85e-05	5	7	7	0	7	8.53	0.000133	821	95018	5.4
239	0	0	0	0	1	PF3D7_0809900.1-p1	242	PF3D7_0809900.1-p1	| transcript=PF3D7_0809900.1 | gene=PF3D7_0809900 | organism=Plasmodium_falciparum_3D7 | gene_product=JmjC domain-containing protein, putative | transcript_product=JmjC domain-containing protein, putative | location=Pf3D7_08_v3:508224-512428(-) | protein_length=1259 | sequence_SO=chromosome | SO=protein_coding | is_pseudo=false	X	X	X	X	X	X	X	X	X	X	X	X	X	X	X	X	X	X	X	X	X	X	X	X	X	X	X	X	1259	149450	8.1
240	0.001011	2	0.001013	2	1	PF3D7_1242700.1-p1	243	PF3D7_1242700.1-p1	| transcript=PF3D7_1242700.1 | gene=PF3D7_1242700 | organism=Plasmodium_falciparum_3D7 | gene_product=40S ribosomal protein S17, putative | transcript_product=40S ribosomal protein S17, putative | location=Pf3D7_12_v3:1803653-1804483(+) | protein_length=137 | sequence_SO=chromosome | SO=protein_coding | is_pseudo=false	2	12	12	0	12	16.06	0.001415	4	7	7	0	7	16.06	0.000608	2	5	5	0	5	7.3	0.000663	3	12	12	0	12	16.06	0.001363	137	16067	10.4
242	0.000123	2	3.8e-05	2	1	PF3D7_0405400.1-p1	245	PF3D7_0405400.1-p1	| transcript=PF3D7_0405400.1 | gene=PF3D7_0405400 | organism=Plasmodium_falciparum_3D7 | gene_product=pre-mRNA-processing-splicing factor 8, putative | transcript_product=pre-mRNA-processing-splicing factor 8, putative | location=Pf3D7_04_v3:291251-300976(+) | protein_length=3136 | sequence_SO=chromosome | SO=protein_coding | is_pseudo=false	11	24	24	0	24	4.88	0.000124	11	32	32	0	32	5.61	0.000121	3	7	7	0	7	1.66	4.05e-05	3	7	7	0	7	1.56	3.47e-05	3136	366398	8.7
244	3.9e-05	1	0.000124	2	1	PF3D7_0629500.1-p1	247	PF3D7_0629500.1-p1	| transcript=PF3D7_0629500.1 | gene=PF3D7_0629500 | organism=Plasmodium_falciparum_3D7 | gene_product=amino acid transporter AAT1 | transcript_product=amino acid transporter AAT1 | location=Pf3D7_06_v3:1213948-1216005(-) | protein_length=606 | sequence_SO=chromosome | SO=protein_coding | is_pseudo=false	X	X	X	X	X	X	X	1	2	2	0	2	1.98	3.93e-05	1	4	4	0	4	1.98	0.00012	2	5	5	0	5	3.14	0.000128	606	68858	9.6
245	0	0	0.000129	1	1	PF3D7_1367500.1-p1	248	PF3D7_1367500.1-p1	| transcript=PF3D7_1367500.1 | gene=PF3D7_1367500 | organism=Plasmodium_falciparum_3D7 | gene_product=NADH-cytochrome b5 reductase, putative | transcript_product=NADH-cytochrome b5 reductase, putative | location=Pf3D7_13_v3:2692076-2693282(+) | protein_length=362 | sequence_SO=chromosome | SO=protein_coding | is_pseudo=false	X	X	X	X	X	X	X	X	X	X	X	X	X	X	X	X	X	X	X	X	X	2	3	3	0	3	4.42	0.000129	362	42596	9.2
246	5.3e-05	2	4e-05	1	1	PF3D7_0822900.1-p1	249	PF3D7_0822900.1-p1	| transcript=PF3D7_0822900.1 | gene=PF3D7_0822900 | organism=Plasmodium_falciparum_3D7 | gene_product=conserved Plasmodium protein, unknown function | transcript_product=conserved Plasmodium protein, unknown function | location=Pf3D7_08_v3:1007777-1011307(-) | protein_length=1176 | sequence_SO=chromosome | SO=protein_coding | is_pseudo=false	1	4	4	0	4	1.7	5.49e-05	4	5	5	0	5	4.85	5.06e-05	X	X	X	X	X	X	X	1	3	3	0	3	1.7	3.97e-05	1176	138241	5.4
247	4.2e-05	1	0	0	1	PF3D7_0405000.1-p1	250	PF3D7_0405000.1-p1	| transcript=PF3D7_0405000.1 | gene=PF3D7_0405000 | organism=Plasmodium_falciparum_3D7 | gene_product=ATP-dependent RNA helicase DDX51, putative | transcript_product=ATP-dependent RNA helicase DDX51, putative | location=Pf3D7_04_v3:268960-271134(-) | protein_length=567 | sequence_SO=chromosome | SO=protein_coding | is_pseudo=false	X	X	X	X	X	X	X	1	2	2	0	2	1.59	4.2e-05	X	X	X	X	X	X	X	X	X	X	X	X	X	X	567	67689	9
248	9.4e-05	1	0.000214	1	1	PF3D7_1419700.1-p1	251	PF3D7_1419700.1-p1	| transcript=PF3D7_1419700.1 | gene=PF3D7_1419700 | organism=Plasmodium_falciparum_3D7 | gene_product=conserved Plasmodium protein, unknown function | transcript_product=conserved Plasmodium protein, unknown function | location=Pf3D7_14_v3:820068-821597(+) | protein_length=509 | sequence_SO=chromosome | SO=protein_coding | is_pseudo=false	X	X	X	X	X	X	X	2	4	4	0	4	9.04	9.35e-05	X	X	X	X	X	X	X	3	7	7	0	7	12.97	0.000214	509	59693	5
252	0.000236	2	0.000127	1	1	PF3D7_1103700.1-p1	255	PF3D7_1103700.1-p1	| transcript=PF3D7_1103700.1 | gene=PF3D7_1103700 | organism=Plasmodium_falciparum_3D7 | gene_product=casein kinase II beta chain | transcript_product=casein kinase II beta chain | location=Pf3D7_11_v3:160115-160852(+) | protein_length=245 | sequence_SO=chromosome | SO=protein_coding | is_pseudo=false	1	2	2	0	2	4.9	0.000132	2	7	7	0	7	15.92	0.00034	X	X	X	X	X	X	X	1	2	2	0	2	4.9	0.000127	245	28365	7.4
253	0.000407	2	0.000371	2	1	PF3D7_1353900.1-p1	257	PF3D7_1353900.1-p1	| transcript=PF3D7_1353900.1 | gene=PF3D7_1353900 | organism=Plasmodium_falciparum_3D7 | gene_product=proteasome subunit alpha type-7, putative | transcript_product=proteasome subunit alpha type-7, putative | location=Pf3D7_13_v3:2154162-2155217(+) | protein_length=241 | sequence_SO=chromosome | SO=protein_coding | is_pseudo=false	3	7	7	0	7	21.99	0.000469	3	7	7	0	7	21.99	0.000346	1	3	3	0	3	6.64	0.000226	2	8	8	0	8	13.28	0.000517	241	27228	6.5
254	0.000239	2	8.6e-05	2	1	PF3D7_1003800.1-p1	258	PF3D7_1003800.1-p1	| transcript=PF3D7_1003800.1 | gene=PF3D7_1003800 | organism=Plasmodium_falciparum_3D7 | gene_product=U5 small nuclear ribonucleoprotein component, putative | transcript_product=U5 small nuclear ribonucleoprotein component, putative | location=Pf3D7_10_v3:172723-176430(-) | protein_length=1235 | sequence_SO=chromosome | SO=protein_coding | is_pseudo=false	6	24	24	0	24	9.72	0.000314	8	17	17	0	17	9.39	0.000164	1	4	4	0	4	1.38	5.88e-05	2	9	9	0	9	3.4	0.000113	1235	142944	5.1
256	0.000396	2	0.000558	2	1	PF3D7_1447900.1-p1	260	PF3D7_1447900.1-p1	| transcript=PF3D7_1447900.1 | gene=PF3D7_1447900 | organism=Plasmodium_falciparum_3D7 | gene_product=multidrug resistance protein 2 | transcript_product=multidrug resistance protein 2 | location=Pf3D7_14_v3:1954601-1957675(-) | protein_length=1024 | sequence_SO=chromosome | SO=protein_coding | is_pseudo=false	9	20	20	0	20	11.52	0.000315	16	41	41	0	41	17.58	0.000477	7	15	15	0	15	8.79	0.000266	17	56	56	0	56	21.29	0.000851	1024	119012	9.1
258	0.000901	2	0.000424	2	1	PF3D7_0929400.1-p1	262	PF3D7_0929400.1-p1	| transcript=PF3D7_0929400.1 | gene=PF3D7_0929400 | organism=Plasmodium_falciparum_3D7 | gene_product=high molecular weight rhoptry protein 2 | transcript_product=high molecular weight rhoptry protein 2 | location=Pf3D7_09_v3:1175203-1180762(+) | protein_length=1378 | sequence_SO=chromosome | SO=protein_coding | is_pseudo=false	21	94	94	0	94	20.97	0.001102	24	81	81	0	81	24.31	0.0007	8	13	13	0	13	8.56	0.000171	19	60	60	0	60	20.46	0.000678	1378	162664	8.3
259	0	0	0	0	1	PF3D7_1329100.1-p1	263	PF3D7_1329100.1-p1	| transcript=PF3D7_1329100.1 | gene=PF3D7_1329100 | organism=Plasmodium_falciparum_3D7 | gene_product=myosin F, putative | transcript_product=myosin F, putative | location=Pf3D7_13_v3:1227372-1234418(-) | protein_length=2160 | sequence_SO=chromosome | SO=protein_coding | is_pseudo=false	X	X	X	X	X	X	X	X	X	X	X	X	X	X	X	X	X	X	X	X	X	X	X	X	X	X	X	X	2160	250288	8.6
263	0	0	0	0	1	PF3D7_1029400.1-p1	267	PF3D7_1029400.1-p1	| transcript=PF3D7_1029400.1 | gene=PF3D7_1029400 | organism=Plasmodium_falciparum_3D7 | gene_product=LEM3/CDC50 family protein, putative | transcript_product=LEM3/CDC50 family protein, putative | location=Pf3D7_10_v3:1200894-1202399(-) | protein_length=501 | sequence_SO=chromosome | SO=protein_coding | is_pseudo=false	X	X	X	X	X	X	X	X	X	X	X	X	X	X	X	X	X	X	X	X	X	X	X	X	X	X	X	X	501	59438	9.2
265	0.0004	1	0	0	2	PF3D7_1038000.1-p1;PF3D7_1038000.2-p1	269	PF3D7_1038000.1-p1	0 genes:. 2 proteins in this group did not match any genes. PF3D7_1038000.1-p1:| transcript=PF3D7_1038000.1 | gene=PF3D7_1038000 | organism=Plasmodium_falciparum_3D7 | gene_product=antigen UB05 | transcript_product=antigen UB05 | location=Pf3D7_10_v3:1505835-1506896(+) | protein_length=119 | sequence_SO=chromosome | SO=protein_coding | is_pseudo=false ;PF3D7_1038000.2-p1:| transcript=PF3D7_103800…	X	X	X	X	X	X	X	2	4	4	0	4	12.61	0.0004	X	X	X	X	X	X	X	X	X	X	X	X	X	X	119	13712	9.4
267	0	0	0	0	1	PF3D7_0324100.1-p1	271	PF3D7_0324100.1-p1	| transcript=PF3D7_0324100.1 | gene=PF3D7_0324100 | organism=Plasmodium_falciparum_3D7 | gene_product=Pfmc-2TM Maurer's cleft two transmembrane protein | transcript_product=Pfmc-2TM Maurer's cleft two transmembrane protein | location=Pf3D7_03_v3:1007413-1008202(-) | protein_length=231 | sequence_SO=chromosome | SO=protein_coding | is_pseudo=false	X	X	X	X	X	X	X	X	X	X	X	X	X	X	2	5	0	5	0	12.99	X	5	12	0	12	0	27.71	X	231	27005	9.5
268	5.2e-05	1	0	0	1	PF3D7_0924400.1-p1	272	PF3D7_0924400.1-p1	| transcript=PF3D7_0924400.1 | gene=PF3D7_0924400 | organism=Plasmodium_falciparum_3D7 | gene_product=conserved Plasmodium protein, unknown function | transcript_product=conserved Plasmodium protein, unknown function | location=Pf3D7_09_v3:988977-992915(+) | protein_length=1245 | sequence_SO=chromosome | SO=protein_coding | is_pseudo=false	2	4	4	0	4	2.97	5.19e-05	X	X	X	X	X	X	X	X	X	X	X	X	X	X	X	X	X	X	X	X	X	1245	144680	6.1
269	0.000501	2	0.000242	2	1	PF3D7_0629200.1-p1	273	PF3D7_0629200.1-p1	| transcript=PF3D7_0629200.1 | gene=PF3D7_0629200 | organism=Plasmodium_falciparum_3D7 | gene_product=DnaJ protein, putative | transcript_product=DnaJ protein, putative | location=Pf3D7_06_v3:1199853-1200995(-) | protein_length=380 | sequence_SO=chromosome | SO=protein_coding | is_pseudo=false	7	14	14	0	14	19.74	0.000595	6	13	13	0	13	16.05	0.000407	3	5	5	0	5	10	0.000239	3	6	6	0	6	10	0.000246	380	44669	8.1
270	0.000165	2	6.3e-05	1	1	PF3D7_1015600.1-p1	274	PF3D7_1015600.1-p1	| transcript=PF3D7_1015600.1 | gene=PF3D7_1015600 | organism=Plasmodium_falciparum_3D7 | gene_product=heat shock protein 60 | transcript_product=heat shock protein 60 | location=Pf3D7_10_v3:627044-629040(-) | protein_length=580 | sequence_SO=chromosome | SO=protein_coding | is_pseudo=false	2	3	3	0	3	6.38	8.35e-05	5	12	12	0	12	12.41	0.000246	1	2	2	0	2	4.14	6.26e-05	X	X	X	X	X	X	X	580	62551	7.1
271	0.002148	2	0.00132	2	1	PF3D7_1465900.1-p1	275	PF3D7_1465900.1-p1	| transcript=PF3D7_1465900.1 | gene=PF3D7_1465900 | organism=Plasmodium_falciparum_3D7 | gene_product=40S ribosomal protein S3 | transcript_product=40S ribosomal protein S3 | location=Pf3D7_14_v3:2684141-2685534(+) | protein_length=221 | sequence_SO=chromosome | SO=protein_coding | is_pseudo=false	3	19	19	0	19	19	0.001388	8	54	54	0	54	44.8	0.002908	3	9	9	0	9	16.74	0.000739	8	27	25	2	27	36.65	0.001901	221	24668	10.2
272	7e-05	2	0.000163	2	1	PF3D7_0112200.1-p1	276	PF3D7_0112200.1-p1	| transcript=PF3D7_0112200.1 | gene=PF3D7_0112200 | organism=Plasmodium_falciparum_3D7 | gene_product=multidrug resistance-associated protein 1 | transcript_product=multidrug resistance-associated protein 1 | location=Pf3D7_01_v3:464726-470194(+) | protein_length=1822 | sequence_SO=chromosome | SO=protein_coding | is_pseudo=false	7	10	10	0	10	5.87	8.86e-05	5	8	8	0	8	5.71	5.23e-05	3	7	7	0	7	3.57	6.98e-05	14	30	30	0	30	11.03	0.000256	1822	214439	8.7
276	6.7e-05	1	0	0	1	PF3D7_0306800.1-p1	280	PF3D7_0306800.1-p1	| transcript=PF3D7_0306800.1 | gene=PF3D7_0306800 | organism=Plasmodium_falciparum_3D7 | gene_product=T-complex protein 1 subunit beta | transcript_product=T-complex protein 1 subunit beta | location=Pf3D7_03_v3:306108-307984(-) | protein_length=533 | sequence_SO=chromosome | SO=protein_coding | is_pseudo=false	X	X	X	X	X	X	X	2	3	3	0	3	6.75	6.7e-05	X	X	X	X	X	X	X	X	X	X	X	X	X	X	533	59199	5.7
277	0.000122	2	5.9e-05	1	1	PF3D7_1326300.1-p1	281	PF3D7_1326300.1-p1	| transcript=PF3D7_1326300.1 | gene=PF3D7_1326300 | organism=Plasmodium_falciparum_3D7 | gene_product=RNA-binding protein, putative | transcript_product=RNA-binding protein, putative | location=Pf3D7_13_v3:1092394-1094187(-) | protein_length=527 | sequence_SO=chromosome | SO=protein_coding | is_pseudo=false	3	5	5	0	5	10.82	0.000153	1	4	4	0	4	4.93	9.03e-05	X	X	X	X	X	X	X	1	2	2	0	2	3.42	5.91e-05	527	62883	9.5
279	0	0	0	0	1	PF3D7_1351000.1-p1	283	PF3D7_1351000.1-p1	| transcript=PF3D7_1351000.1 | gene=PF3D7_1351000 | organism=Plasmodium_falciparum_3D7 | gene_product=phosphatidylinositol transfer protein, putative | transcript_product=phosphatidylinositol transfer protein, putative | location=Pf3D7_13_v3:2033838-2039882(+) | protein_length=1860 | sequence_SO=chromosome | SO=protein_coding | is_pseudo=false	X	X	X	X	X	X	X	X	X	X	X	X	X	X	X	X	X	X	X	X	X	X	X	X	X	X	X	X	1860	221104	6.3
280	1.1e-05	1	3.3e-05	2	1	PF3D7_1149000.1-p1	285	PF3D7_1149000.1-p1	| transcript=PF3D7_1149000.1 | gene=PF3D7_1149000 | organism=Plasmodium_falciparum_3D7 | gene_product=antigen 332, DBL-like protein | transcript_product=antigen 332, DBL-like protein | location=Pf3D7_11_v3:1950210-1968726(+) | protein_length=6093 | sequence_SO=chromosome | SO=protein_coding | is_pseudo=false	1	4	4	0	4	0.16	1.06e-05	X	X	X	X	X	X	X	2	3	3	0	3	0.34	8.94e-06	11	22	22	0	22	2.59	5.62e-05	6093	689296	3.9
282	0.000149	2	0.000136	1	1	PF3D7_0527500.1-p1	287	PF3D7_0527500.1-p1	| transcript=PF3D7_0527500.1 | gene=PF3D7_0527500 | organism=Plasmodium_falciparum_3D7 | gene_product=Hsc70-interacting protein | transcript_product=Hsc70-interacting protein | location=Pf3D7_05_v3:1143618-1145359(+) | protein_length=458 | sequence_SO=chromosome | SO=protein_coding | is_pseudo=false	3	7	7	0	7	8.3	0.000247	1	2	2	0	2	3.06	5.2e-05	X	X	X	X	X	X	X	2	4	4	0	4	3.06	0.000136	458	51125	4.8
283	0.000272	1	0	0	2	PF3D7_1115300.1-p1;PF3D7_1115700.1-p1	288	PF3D7_1115300.1-p1	0 genes:. 2 proteins in this group did not match any genes. PF3D7_1115300.1-p1:| transcript=PF3D7_1115300.1 | gene=PF3D7_1115300 | organism=Plasmodium_falciparum_3D7 | gene_product=cysteine proteinase falcipain 2b | transcript_product=cysteine proteinase falcipain 2b | location=Pf3D7_11_v3:581250-582698(-) | protein_length=482 | sequence_SO=chromosome | SO=protein_coding | is_pseudo=false ;PF3D7_…	X	X	X	X	X	X	X	2	11	11	0	11	3.32	0.000272	X	X	X	X	X	X	X	X	X	X	X	X	X	X	482	55803	8
285	0.001124	2	0.001218	2	1	PF3D7_0517300.1-p1	290	PF3D7_0517300.1-p1	| transcript=PF3D7_0517300.1 | gene=PF3D7_0517300 | organism=Plasmodium_falciparum_3D7 | gene_product=serine/arginine-rich splicing factor 1 | transcript_product=serine/arginine-rich splicing factor 1 | location=Pf3D7_05_v3:724681-725751(-) | protein_length=298 | sequence_SO=chromosome | SO=protein_coding | is_pseudo=false	1	40	40	0	40	4.36	0.002168	1	2	2	0	2	4.36	7.99e-05	1	16	16	0	16	4.36	0.000975	1	28	28	0	28	4.36	0.001462	298	34561	10.6
286	0.000437	2	0.000471	2	1	PF3D7_1224300.1-p1	291	PF3D7_1224300.1-p1	| transcript=PF3D7_1224300.1 | gene=PF3D7_1224300 | organism=Plasmodium_falciparum_3D7 | gene_product=polyadenylate-binding protein 1, putative | transcript_product=polyadenylate-binding protein 1, putative | location=Pf3D7_12_v3:988628-991255(+) | protein_length=875 | sequence_SO=chromosome | SO=protein_coding | is_pseudo=false	8	23	23	0	23	15.31	0.000425	9	33	33	0	33	18.06	0.000449	3	6	6	0	6	4.57	0.000124	10	46	46	0	46	18.51	0.000818	875	97230	8.9
287	0.000676	2	0.001493	2	1	PF3D7_1219100.1-p1	292	PF3D7_1219100.1-p1	| transcript=PF3D7_1219100.1 | gene=PF3D7_1219100 | organism=Plasmodium_falciparum_3D7 | gene_product=clathrin heavy chain, putative | transcript_product=clathrin heavy chain, putative | location=Pf3D7_12_v3:757649-763642(+) | protein_length=1997 | sequence_SO=chromosome | SO=protein_coding | is_pseudo=false	30	100	100	0	100	20.93	0.000809	33	91	89	2	91	23.28	0.000542	23	67	67	0	67	17.93	0.000609	61	305	301	4	305	41.31	0.002377	1997	232949	6.4
288	0	0	0	0	1	PF3D7_0514900.1-p1	293	PF3D7_0514900.1-p1	| transcript=PF3D7_0514900.1 | gene=PF3D7_0514900 | organism=Plasmodium_falciparum_3D7 | gene_product=conserved Plasmodium protein, unknown function | transcript_product=conserved Plasmodium protein, unknown function | location=Pf3D7_05_v3:618629-619945(+) | protein_length=438 | sequence_SO=chromosome | SO=protein_coding | is_pseudo=false	X	X	X	X	X	X	X	X	X	X	X	X	X	X	X	X	X	X	X	X	X	X	X	X	X	X	X	X	438	51900	7.1
290	4.5e-05	2	0	0	1	PF3D7_0320300.1-p1	295	PF3D7_0320300.1-p1	| transcript=PF3D7_0320300.1 | gene=PF3D7_0320300 | organism=Plasmodium_falciparum_3D7 | gene_product=T-complex protein 1 subunit epsilon | transcript_product=T-complex protein 1 subunit epsilon | location=Pf3D7_03_v3:845713-847320(+) | protein_length=535 | sequence_SO=chromosome | SO=protein_coding | is_pseudo=false	2	3	1	2	1.5	8.22	4.53e-05	1	2	2	0	2	5.61	4.45e-05	X	X	X	X	X	X	X	X	X	X	X	X	X	X	535	59176	6
293	0	0	1.3e-05	1	1	PF3D7_1456500.1-p1	298	PF3D7_1456500.1-p1	| transcript=PF3D7_1456500.1 | gene=PF3D7_1456500 | organism=Plasmodium_falciparum_3D7 | gene_product=conserved Plasmodium protein, unknown function | transcript_product=conserved Plasmodium protein, unknown function | location=Pf3D7_14_v3:2314380-2321555(+) | protein_length=2391 | sequence_SO=chromosome | SO=protein_coding | is_pseudo=false	X	X	X	X	X	X	X	X	X	X	X	X	X	X	X	X	X	X	X	X	X	1	2	2	0	2	0.46	1.3e-05	2391	283201	7.2
294	0.000376	2	0.000648	1	1	PF3D7_0210100.1-p1	299	PF3D7_0210100.1-p1	| transcript=PF3D7_0210100.1 | gene=PF3D7_0210100 | organism=Plasmodium_falciparum_3D7 | gene_product=60S ribosomal protein L37ae, putative | transcript_product=60S ribosomal protein L37ae, putative | location=Pf3D7_02_v3:412275-412859(+) | protein_length=96 | sequence_SO=chromosome | SO=protein_coding | is_pseudo=false	2	3	3	0	3	28.13	0.000505	1	2	2	0	2	9.38	0.000248	X	X	X	X	X	X	X	2	4	4	0	4	28.13	0.000648	96	10799	10.5
295	1.8e-05	1	0	0	1	PF3D7_0704100.1-p1	300	PF3D7_0704100.1-p1	| transcript=PF3D7_0704100.1 | gene=PF3D7_0704100 | organism=Plasmodium_falciparum_3D7 | gene_product=conserved Plasmodium membrane protein, unknown function | transcript_product=conserved Plasmodium membrane protein, unknown function | location=Pf3D7_07_v3:180036-190715(+) | protein_length=3559 | sequence_SO=chromosome | SO=protein_coding | is_pseudo=false	2	4	4	0	4	0.59	1.82e-05	X	X	X	X	X	X	X	X	X	X	X	X	X	X	X	X	X	X	X	X	X	3559	425267	8.8
297	0.005478	2	0.004174	2	1	PF3D7_1414300.1-p1	302	PF3D7_1414300.1-p1	| transcript=PF3D7_1414300.1 | gene=PF3D7_1414300 | organism=Plasmodium_falciparum_3D7 | gene_product=60S ribosomal protein L10, putative | transcript_product=60S ribosomal protein L10, putative | location=Pf3D7_14_v3:570802-571461(+) | protein_length=219 | sequence_SO=chromosome | SO=protein_coding | is_pseudo=false	5	97	97	0	97	24.66	0.007153	4	70	70	0	70	24.2	0.003804	6	45	45	0	45	28.77	0.00373	6	65	65	0	65	28.77	0.004618	219	25216	10
298	7.6e-05	1	0.000124	1	1	PF3D7_1013300.1-p1	303	PF3D7_1013300.1-p1	| transcript=PF3D7_1013300.1 | gene=PF3D7_1013300 | organism=Plasmodium_falciparum_3D7 | gene_product=conserved Plasmodium protein, unknown function | transcript_product=conserved Plasmodium protein, unknown function | location=Pf3D7_10_v3:515721-517607(-) | protein_length=628 | sequence_SO=chromosome | SO=protein_coding | is_pseudo=false	X	X	X	X	X	X	X	1	4	4	0	4	2.07	7.58e-05	X	X	X	X	X	X	X	1	5	5	0	5	2.07	0.000124	628	75469	9.3
299	0.00027	2	0.00037	1	1	PF3D7_0312800.1-p1	304	PF3D7_0312800.1-p1	| transcript=PF3D7_0312800.1 | gene=PF3D7_0312800 | organism=Plasmodium_falciparum_3D7 | gene_product=60S ribosomal protein L26, putative | transcript_product=60S ribosomal protein L26, putative | location=Pf3D7_03_v3:534239-535238(+) | protein_length=126 | sequence_SO=chromosome | SO=protein_coding | is_pseudo=false	1	2	2	0	2	7.14	0.000256	2	3	3	0	3	15.87	0.000283	X	X	X	X	X	X	X	2	3	3	0	3	15.87	0.00037	126	14813	11.1
301	9.5e-05	2	0	0	1	PF3D7_0303400.1-p1	306	PF3D7_0303400.1-p1	| transcript=PF3D7_0303400.1 | gene=PF3D7_0303400 | organism=Plasmodium_falciparum_3D7 | gene_product=palmitoyltransferase DHHC1 | transcript_product=palmitoyltransferase DHHC1 | location=Pf3D7_03_v3:178420-181127(+) | protein_length=616 | sequence_SO=chromosome | SO=protein_coding | is_pseudo=false	2	5	5	0	5	4.22	0.000131	2	3	3	0	3	3.57	5.8e-05	X	X	X	X	X	X	X	X	X	X	X	X	X	X	616	73863	8.2
302	0.000395	1	0.000281	1	1	PF3D7_1020900.1-p1	307	PF3D7_1020900.1-p1	| transcript=PF3D7_1020900.1 | gene=PF3D7_1020900 | organism=Plasmodium_falciparum_3D7 | gene_product=ADP-ribosylation factor | transcript_product=ADP-ribosylation factor | location=Pf3D7_10_v3:845086-846192(-) | protein_length=181 | sequence_SO=chromosome | SO=protein_coding | is_pseudo=false	X	X	X	X	X	X	X	3	6	4	2	6	22.1	0.000395	2	4	2	2	2.8	17.68	0.000281	X	X	X	X	X	X	X	181	20912	6.2
305	0.000147	1	0.000192	1	1	PF3D7_1309100.1-p1	310	PF3D7_1309100.1-p1	| transcript=PF3D7_1309100.1 | gene=PF3D7_1309100 | organism=Plasmodium_falciparum_3D7 | gene_product=60S ribosomal protein L24, putative | transcript_product=60S ribosomal protein L24, putative | location=Pf3D7_13_v3:418820-420121(+) | protein_length=162 | sequence_SO=chromosome | SO=protein_coding | is_pseudo=false	X	X	X	X	X	X	X	1	2	2	0	2	6.17	0.000147	X	X	X	X	X	X	X	1	2	2	0	2	4.94	0.000192	162	19245	10.4
306	0.001113	2	0.000449	2	1	PF3D7_1364800.1-p1	311	PF3D7_1364800.1-p1	| transcript=PF3D7_1364800.1 | gene=PF3D7_1364800 | organism=Plasmodium_falciparum_3D7 | gene_product=DNA-directed RNA polymerases I, II, and III subunit RPABC1, putative | transcript_product=DNA-directed RNA polymerases I, II, and III subunit RPABC1, putative | location=Pf3D7_13_v3:2603463-2604972(-) | protein_length=205 | sequence_SO=chromosome | SO=protein_coding | is_pseudo=false	1	15	15	0	15	4.88	0.001182	2	18	18	0	18	9.76	0.001045	1	5	5	0	5	4.88	0.000443	1	6	6	0	6	4.88	0.000455	205	24154	9.1
307	0.005532	2	0.004748	2	1	PF3D7_0721600.1-p1	312	PF3D7_0721600.1-p1	| transcript=PF3D7_0721600.1 | gene=PF3D7_0721600 | organism=Plasmodium_falciparum_3D7 | gene_product=40S ribosomal protein S5, putative | transcript_product=40S ribosomal protein S5, putative | location=Pf3D7_07_v3:931459-932164(-) | protein_length=195 | sequence_SO=chromosome | SO=protein_coding | is_pseudo=false	9	96	96	0	96	53.85	0.007951	7	51	51	0	51	53.85	0.003113	3	30	30	0	30	26.67	0.002793	7	84	84	0	84	53.85	0.006703	195	21863	9.6
309	1.6e-05	2	0	0	1	PF3D7_1408200.1-p1	314	PF3D7_1408200.1-p1	| transcript=PF3D7_1408200.1 | gene=PF3D7_1408200 | organism=Plasmodium_falciparum_3D7 | gene_product=AP2 domain transcription factor AP2-G2, putative | transcript_product=AP2 domain transcription factor AP2-G2, putative | location=Pf3D7_14_v3:300725-305833(-) | protein_length=1702 | sequence_SO=chromosome | SO=protein_coding | is_pseudo=false	1	2	2	0	2	1.12	1.9e-05	2	2	2	0	2	1.29	1.4e-05	X	X	X	X	X	X	X	X	X	X	X	X	X	X	1702	200795	5.8
310	0.000151	1	0.000158	1	1	PF3D7_1306400.1-p1	315	PF3D7_1306400.1-p1	| transcript=PF3D7_1306400.1 | gene=PF3D7_1306400 | organism=Plasmodium_falciparum_3D7 | gene_product=26S protease regulatory subunit 10B, putative | transcript_product=26S protease regulatory subunit 10B, putative | location=Pf3D7_13_v3:297178-298359(-) | protein_length=393 | sequence_SO=chromosome | SO=protein_coding | is_pseudo=false	X	X	X	X	X	X	X	3	5	5	0	5	12.21	0.000151	X	X	X	X	X	X	X	1	4	4	0	4	5.09	0.000158	393	44677	8.9
311	0.000182	2	0.000246	2	1	PF3D7_0102200.1-p1	316	PF3D7_0102200.1-p1	| transcript=PF3D7_0102200.1 | gene=PF3D7_0102200 | organism=Plasmodium_falciparum_3D7 | gene_product=ring-infected erythrocyte surface antigen | transcript_product=ring-infected erythrocyte surface antigen | location=Pf3D7_01_v3:98819-102282(+) | protein_length=1085 | sequence_SO=chromosome | SO=protein_coding | is_pseudo=false	3	9	9	0	9	2.95	0.000134	6	21	21	0	21	7.19	0.00023	3	8	8	0	8	2.95	0.000134	5	25	25	0	25	3.96	0.000359	1085	126521	4.5
312	2.7e-05	1	3.5e-05	1	1	PF3D7_0302100.1-p1	317	PF3D7_0302100.1-p1	| transcript=PF3D7_0302100.1 | gene=PF3D7_0302100 | organism=Plasmodium_falciparum_3D7 | gene_product=serine/threonine protein kinase | transcript_product=serine/threonine protein kinase | location=Pf3D7_03_v3:114070-118086(+) | protein_length=1338 | sequence_SO=chromosome | SO=protein_coding | is_pseudo=false	X	X	X	X	X	X	X	2	3	3	0	3	2.32	2.67e-05	X	X	X	X	X	X	X	2	3	3	0	3	1.72	3.49e-05	1338	157372	6
313	0.00694	2	0.014076	2	1	PF3D7_1370300.1-p1	318	PF3D7_1370300.1-p1	| transcript=PF3D7_1370300.1 | gene=PF3D7_1370300 | organism=Plasmodium_falciparum_3D7 | gene_product=membrane associated histidine-rich protein 1 | transcript_product=membrane associated histidine-rich protein 1 | location=Pf3D7_13_v3:2787972-2788913(+) | protein_length=249 | sequence_SO=chromosome | SO=protein_coding | is_pseudo=false	7	144	144	0	144	22.49	0.00934	7	95	95	0	95	20.08	0.004541	5	27	27	0	27	19.68	0.001968	8	419	419	0	419	19.68	0.026184	249	28949	6.4
315	0.000283	2	0	0	1	PF3D7_1455700.1-p1	320	PF3D7_1455700.1-p1	| transcript=PF3D7_1455700.1 | gene=PF3D7_1455700 | organism=Plasmodium_falciparum_3D7 | gene_product=conserved Plasmodium protein, unknown function | transcript_product=conserved Plasmodium protein, unknown function | location=Pf3D7_14_v3:2278701-2282162(-) | protein_length=1077 | sequence_SO=chromosome | SO=protein_coding | is_pseudo=false	4	20	20	0	20	7.71	0.0003	8	24	24	0	24	13.93	0.000265	X	X	X	X	X	X	X	X	X	X	X	X	X	X	1077	126119	6.7
316	5.3e-05	2	2.6e-05	1	1	PF3D7_1308200.1-p1	321	PF3D7_1308200.1-p1	| transcript=PF3D7_1308200.1 | gene=PF3D7_1308200 | organism=Plasmodium_falciparum_3D7 | gene_product=carbamoyl phosphate synthetase | transcript_product=carbamoyl phosphate synthetase | location=Pf3D7_13_v3:361166-368495(-) | protein_length=2375 | sequence_SO=chromosome | SO=protein_coding | is_pseudo=false	4	9	9	0	9	2.02	6.12e-05	4	9	9	0	9	2.74	4.51e-05	X	X	X	X	X	X	X	3	4	4	0	4	1.68	2.62e-05	2375	273437	6.6
317	0.000262	2	0.000112	1	1	PF3D7_0105800.1-p1	322	PF3D7_0105800.1-p1	| transcript=PF3D7_0105800.1 | gene=PF3D7_0105800 | organism=Plasmodium_falciparum_3D7 | gene_product=cyclin-dependent kinases regulatory subunit, putative | transcript_product=cyclin-dependent kinases regulatory subunit, putative | location=Pf3D7_01_v3:249231-252010(-) | protein_length=832 | sequence_SO=chromosome | SO=protein_coding | is_pseudo=false	4	10	10	0	10	8.17	0.000194	9	23	23	0	23	13.94	0.000329	X	X	X	X	X	X	X	3	6	6	0	6	4.09	0.000112	832	99310	9
318	2.5e-05	2	0	0	1	PF3D7_1329500.1-p1	323	PF3D7_1329500.1-p1	| transcript=PF3D7_1329500.1 | gene=PF3D7_1329500 | organism=Plasmodium_falciparum_3D7 | gene_product=conserved protein, unknown function | transcript_product=conserved protein, unknown function | location=Pf3D7_13_v3:1252059-1257973(+) | protein_length=1844 | sequence_SO=chromosome | SO=protein_coding | is_pseudo=false	1	2	2	0	2	0.81	1.75e-05	2	5	5	0	5	1.03	3.23e-05	X	X	X	X	X	X	X	X	X	X	X	X	X	X	1844	218437	8.1
320	2.6e-05	1	0	0	1	PF3D7_1320000.1-p1	325	PF3D7_1320000.1-p1	| transcript=PF3D7_1320000.1 | gene=PF3D7_1320000 | organism=Plasmodium_falciparum_3D7 | gene_product=golgi protein 1 | transcript_product=golgi protein 1 | location=Pf3D7_13_v3:829534-833310(+) | protein_length=1258 | sequence_SO=chromosome | SO=protein_coding | is_pseudo=false	1	2	2	0	2	1.75	2.57e-05	X	X	X	X	X	X	X	X	X	X	X	X	X	X	X	X	X	X	X	X	X	1258	149179	6.9
322	0.000627	2	0.000231	2	1	PF3D7_1007700.1-p1	327	PF3D7_1007700.1-p1	| transcript=PF3D7_1007700.1 | gene=PF3D7_1007700 | organism=Plasmodium_falciparum_3D7 | gene_product=AP2 domain transcription factor AP2-I | transcript_product=AP2 domain transcription factor AP2-I | location=Pf3D7_10_v3:301126-305919(-) | protein_length=1597 | sequence_SO=chromosome | SO=protein_coding | is_pseudo=false	14	71	71	0	71	10.52	0.000718	17	72	72	0	72	12.46	0.000537	4	14	14	0	14	3.32	0.000159	13	31	31	0	31	11.02	0.000302	1597	182665	6.2
324	0.000676	2	0.000429	2	1	PF3D7_1410400.1-p1	329	PF3D7_1410400.1-p1	| transcript=PF3D7_1410400.1 | gene=PF3D7_1410400 | organism=Plasmodium_falciparum_3D7 | gene_product=rhoptry-associated protein 1 | transcript_product=rhoptry-associated protein 1 | location=Pf3D7_14_v3:420442-422790(+) | protein_length=782 | sequence_SO=chromosome | SO=protein_coding | is_pseudo=false	12	33	33	0	33	26.47	0.000682	12	44	44	0	44	22.51	0.00067	5	13	13	0	13	8.18	0.000302	11	28	28	0	28	17.77	0.000557	782	90053	7.1
325	0.000288	1	0	0	1	PF3D7_1109900.1-p1	330	PF3D7_1109900.1-p1	| transcript=PF3D7_1109900.1 | gene=PF3D7_1109900 | organism=Plasmodium_falciparum_3D7 | gene_product=60S ribosomal protein L36 | transcript_product=60S ribosomal protein L36 | location=Pf3D7_11_v3:397124-397775(+) | protein_length=112 | sequence_SO=chromosome | SO=protein_coding | is_pseudo=false	1	2	2	0	2	8.93	0.000288	X	X	X	X	X	X	X	X	X	X	X	X	X	X	X	X	X	X	X	X	X	112	12787	11.1
327	4.2e-05	1	0	0	1	PF3D7_0505200.1-p1	332	PF3D7_0505200.1-p1	| transcript=PF3D7_0505200.1 | gene=PF3D7_0505200 | organism=Plasmodium_falciparum_3D7 | gene_product=actin-like protein, putative | transcript_product=actin-like protein, putative | location=Pf3D7_05_v3:230695-232392(+) | protein_length=565 | sequence_SO=chromosome | SO=protein_coding | is_pseudo=false	X	X	X	X	X	X	X	2	2	2	0	2	5.31	4.21e-05	X	X	X	X	X	X	X	X	X	X	X	X	X	X	565	65868	5.3
328	0	0	0	0	1	PF3D7_1359000.1-p1	333	PF3D7_1359000.1-p1	| transcript=PF3D7_1359000.1 | gene=PF3D7_1359000 | organism=Plasmodium_falciparum_3D7 | gene_product=conserved Plasmodium protein, unknown function | transcript_product=conserved Plasmodium protein, unknown function | location=Pf3D7_13_v3:2336005-2345850(-) | protein_length=3281 | sequence_SO=chromosome | SO=protein_coding | is_pseudo=false	X	X	X	X	X	X	X	X	X	X	X	X	X	X	X	X	X	X	X	X	X	X	X	X	X	X	X	X	3281	394592	8.7
330	5e-05	1	0	0	1	PF3D7_0414000.1-p1	335	PF3D7_0414000.1-p1	| transcript=PF3D7_0414000.1 | gene=PF3D7_0414000 | organism=Plasmodium_falciparum_3D7 | gene_product=structural maintenance of chromosomes protein 3, putative | transcript_product=structural maintenance of chromosomes protein 3, putative | location=Pf3D7_04_v3:626891-633126(-) | protein_length=1193 | sequence_SO=chromosome | SO=protein_coding | is_pseudo=false	X	X	X	X	X	X	X	2	5	5	0	5	2.1	4.99e-05	X	X	X	X	X	X	X	X	X	X	X	X	X	X	1193	141225	6.9
331	0.000695	2	0.000396	1	1	PF3D7_1103100.1-p1	336	PF3D7_1103100.1-p1	| transcript=PF3D7_1103100.1 | gene=PF3D7_1103100 | organism=Plasmodium_falciparum_3D7 | gene_product=60S acidic ribosomal protein P1, putative | transcript_product=60S acidic ribosomal protein P1, putative | location=Pf3D7_11_v3:140048-140801(-) | protein_length=118 | sequence_SO=chromosome | SO=protein_coding | is_pseudo=false	2	5	5	0	5	39.83	0.000684	2	7	7	0	7	13.56	0.000706	X	X	X	X	X	X	X	1	3	3	0	3	13.56	0.000396	118	13014	4.6
333	3e-05	1	5.8e-05	1	1	PF3D7_1455500.1-p1	338	PF3D7_1455500.1-p1	| transcript=PF3D7_1455500.1 | gene=PF3D7_1455500 | organism=Plasmodium_falciparum_3D7 | gene_product=AP-1 complex subunit gamma, putative | transcript_product=AP-1 complex subunit gamma, putative | location=Pf3D7_14_v3:2267201-2270851(+) | protein_length=1081 | sequence_SO=chromosome | SO=protein_coding | is_pseudo=false	1	2	2	0	2	1.76	2.99e-05	X	X	X	X	X	X	X	X	X	X	X	X	X	X	3	4	4	0	4	6.11	5.76e-05	1081	124243	6.9
334	2.6e-05	2	4.2e-05	1	1	PF3D7_0904900.1-p1	339	PF3D7_0904900.1-p1	| transcript=PF3D7_0904900.1 | gene=PF3D7_0904900 | organism=Plasmodium_falciparum_3D7 | gene_product=copper-transporting ATPase | transcript_product=copper-transporting ATPase | location=Pf3D7_09_v3:224875-232831(-) | protein_length=2568 | sequence_SO=chromosome | SO=protein_coding | is_pseudo=false	1	3	3	0	3	0.51	1.89e-05	5	7	7	0	7	2.45	3.24e-05	X	X	X	X	X	X	X	4	7	7	0	7	1.91	4.24e-05	2568	299389	5.8
338	0.001017	2	0.000332	2	1	PF3D7_1466400.1-p1	343	PF3D7_1466400.1-p1	| transcript=PF3D7_1466400.1 | gene=PF3D7_1466400 | organism=Plasmodium_falciparum_3D7 | gene_product=AP2 domain transcription factor AP2-EXP | transcript_product=AP2 domain transcription factor AP2-EXP | location=Pf3D7_14_v3:2714844-2717285(-) | protein_length=813 | sequence_SO=chromosome | SO=protein_coding | is_pseudo=false	11	67	67	0	67	16.97	0.001331	12	48	48	0	48	18.94	0.000703	4	10	10	0	10	8.12	0.000223	7	23	23	0	23	13.41	0.00044	813	92093	8.4
339	0.000385	1	0.000185	1	1	PF3D7_1446600.1-p1	344	PF3D7_1446600.1-p1	| transcript=PF3D7_1446600.1 | gene=PF3D7_1446600 | organism=Plasmodium_falciparum_3D7 | gene_product=centrin-2 | transcript_product=centrin-2 | location=Pf3D7_14_v3:1917232-1918010(-) | protein_length=168 | sequence_SO=chromosome | SO=protein_coding | is_pseudo=false	2	4	4	0	4	16.67	0.000385	X	X	X	X	X	X	X	X	X	X	X	X	X	X	1	2	2	0	2	7.14	0.000185	168	19311	4.7
340	0.0006	2	0.000299	2	1	PF3D7_1338200.1-p1	345	PF3D7_1338200.1-p1	| transcript=PF3D7_1338200.1 | gene=PF3D7_1338200 | organism=Plasmodium_falciparum_3D7 | gene_product=60S ribosomal protein L6, putative | transcript_product=60S ribosomal protein L6, putative | location=Pf3D7_13_v3:1545070-1545735(-) | protein_length=221 | sequence_SO=chromosome | SO=protein_coding | is_pseudo=false	3	12	12	0	12	24.89	0.000877	2	6	6	0	6	18.55	0.000323	1	3	3	0	3	8.6	0.000246	2	5	5	0	5	18.55	0.000352	221	25532	10.1
341	2.2e-05	1	0	0	1	PF3D7_1210600.1-p1	346	PF3D7_1210600.1-p1	| transcript=PF3D7_1210600.1 | gene=PF3D7_1210600 | organism=Plasmodium_falciparum_3D7 | gene_product=conserved Plasmodium protein, unknown function | transcript_product=conserved Plasmodium protein, unknown function | location=Pf3D7_12_v3:472260-475457(-) | protein_length=1065 | sequence_SO=chromosome | SO=protein_coding | is_pseudo=false	X	X	X	X	X	X	X	1	2	2	0	2	1.41	2.24e-05	X	X	X	X	X	X	X	X	X	X	X	X	X	X	1065	122856	6.4
343	2.4e-05	2	0	0	1	PF3D7_1225200.1-p1	348	PF3D7_1225200.1-p1	| transcript=PF3D7_1225200.1 | gene=PF3D7_1225200 | organism=Plasmodium_falciparum_3D7 | gene_product=conserved Plasmodium protein, unknown function | transcript_product=conserved Plasmodium protein, unknown function | location=Pf3D7_12_v3:1024455-1028018(-) | protein_length=1187 | sequence_SO=chromosome | SO=protein_coding | is_pseudo=false	1	2	2	0	2	0.76	2.72e-05	2	2	2	0	2	2.44	2.01e-05	X	X	X	X	X	X	X	X	X	X	X	X	X	X	1187	138143	6.3
345	0.000289	2	0.00039	1	1	PF3D7_1130400.1-p1	350	PF3D7_1130400.1-p1	| transcript=PF3D7_1130400.1 | gene=PF3D7_1130400 | organism=Plasmodium_falciparum_3D7 | gene_product=26S protease regulatory subunit 6A, putative | transcript_product=26S protease regulatory subunit 6A, putative | location=Pf3D7_11_v3:1168879-1170198(+) | protein_length=439 | sequence_SO=chromosome | SO=protein_coding | is_pseudo=false	1	12	12	0	12	2.73	0.000441	4	5	5	0	5	10.71	0.000136	X	X	X	X	X	X	X	1	11	11	0	11	2.73	0.00039	439	49541	5.2
346	0.000189	2	0.001406	2	1	PF3D7_0601200.1-p1	351	PF3D7_0601200.1-p1	| transcript=PF3D7_0601200.1 | gene=PF3D7_0601200 | organism=Plasmodium_falciparum_3D7 | gene_product=Pfmc-2TM Maurer's cleft two transmembrane protein | transcript_product=Pfmc-2TM Maurer's cleft two transmembrane protein | location=Pf3D7_06_v3:47463-48261(+) | protein_length=234 | sequence_SO=chromosome | SO=protein_coding | is_pseudo=false	2	4	4	0	4	7.26	0.000276	1	2	2	0	2	5.56	0.000102	6	19	6	13	9.554	24.79	0.000741	9	108	9	99	31.13	34.19	0.00207	234	27302	9.7
347	1.7e-05	2	1.3e-05	1	1	PF3D7_1008000.1-p1	352	PF3D7_1008000.1-p1	| transcript=PF3D7_1008000.1 | gene=PF3D7_1008000 | organism=Plasmodium_falciparum_3D7 | gene_product=histone deacetylase 2 | transcript_product=histone deacetylase 2 | location=Pf3D7_10_v3:321011-328150(+) | protein_length=2379 | sequence_SO=chromosome | SO=protein_coding | is_pseudo=false	1	2	2	0	2	0.46	1.36e-05	1	4	4	0	4	0.46	2e-05	X	X	X	X	X	X	X	1	2	2	0	2	0.46	1.31e-05	2379	282227	8.9
348	0	0	0.001313	2	1	PF3D7_0114100.1-p1	353	PF3D7_0114100.1-p1	| transcript=PF3D7_0114100.1 | gene=PF3D7_0114100 | organism=Plasmodium_falciparum_3D7 | gene_product=Pfmc-2TM Maurer's cleft two transmembrane protein | transcript_product=Pfmc-2TM Maurer's cleft two transmembrane protein | location=Pf3D7_01_v3:547597-548380(-) | protein_length=229 | sequence_SO=chromosome | SO=protein_coding | is_pseudo=false	X	X	X	X	X	X	X	X	X	X	X	X	X	X	6	19	1	18	3.776	34.93	0.000299	10	115	11	104	34.25	34.93	0.002327	229	26900	9.7
351	0	0	0.000973	1	1	PF3D7_0601900.1-p1	356	PF3D7_0601900.1-p1	| transcript=PF3D7_0601900.1 | gene=PF3D7_0601900 | organism=Plasmodium_falciparum_3D7 | gene_product=conserved Plasmodium protein, unknown function | transcript_product=conserved Plasmodium protein, unknown function | location=Pf3D7_06_v3:78190-78784(+) | protein_length=128 | sequence_SO=chromosome | SO=protein_coding | is_pseudo=false	X	X	X	X	X	X	X	X	X	X	X	X	X	X	X	X	X	X	X	X	X	2	8	8	0	8	24.22	0.000973	128	14726	9
352	0.00564	2	0.002084	2	1	PF3D7_1117700.1-p1	357	PF3D7_1117700.1-p1	| transcript=PF3D7_1117700.1 | gene=PF3D7_1117700 | organism=Plasmodium_falciparum_3D7 | gene_product=GTP-binding nuclear protein RAN/TC4 | transcript_product=GTP-binding nuclear protein RAN/TC4 | location=Pf3D7_11_v3:670711-671515(-) | protein_length=214 | sequence_SO=chromosome | SO=protein_coding | is_pseudo=false	8	79	64	15	78	41.12	0.005886	8	121	19	102	97	41.12	0.005394	5	20	18	2	20	30.84	0.001697	7	36	25	11	34	41.12	0.002472	214	24875	8
354	0	0	0	0	1	PF3D7_1446500.1-p1	359	PF3D7_1446500.1-p1	| transcript=PF3D7_1446500.1 | gene=PF3D7_1446500 | organism=Plasmodium_falciparum_3D7 | gene_product=nucleoporin NUP313, putative | transcript_product=nucleoporin NUP313, putative | location=Pf3D7_14_v3:1907197-1916202(+) | protein_length=3001 | sequence_SO=chromosome | SO=protein_coding | is_pseudo=false	X	X	X	X	X	X	X	X	X	X	X	X	X	X	X	X	X	X	X	X	X	X	X	X	X	X	X	X	3001	346921	8.8
356	0.000131	1	0	0	1	PF3D7_0829200.1-p1	361	PF3D7_0829200.1-p1	| transcript=PF3D7_0829200.1 | gene=PF3D7_0829200 | organism=Plasmodium_falciparum_3D7 | gene_product=prohibitin 1, putative | transcript_product=prohibitin 1, putative | location=Pf3D7_08_v3:1254558-1255376(+) | protein_length=272 | sequence_SO=chromosome | SO=protein_coding | is_pseudo=false	X	X	X	X	X	X	X	2	3	3	0	3	15.44	0.000131	X	X	X	X	X	X	X	X	X	X	X	X	X	X	272	30558	8.7
357	0.001475	2	0.000363	1	1	PF3D7_0525800.1-p1	362	PF3D7_0525800.1-p1	| transcript=PF3D7_0525800.1 | gene=PF3D7_0525800 | organism=Plasmodium_falciparum_3D7 | gene_product=inner membrane complex protein 1g, putative | transcript_product=inner membrane complex protein 1g, putative | location=Pf3D7_05_v3:1071247-1072149(+) | protein_length=300 | sequence_SO=chromosome | SO=protein_coding | is_pseudo=false	5	43	43	0	43	21.33	0.002315	1	16	16	0	16	3.33	0.000635	X	X	X	X	X	X	X	1	7	7	0	7	3.33	0.000363	300	34341	7
359	0.00099	2	0.000537	2	1	PF3D7_0827900.1-p1	364	PF3D7_0827900.1-p1	| transcript=PF3D7_0827900.1 | gene=PF3D7_0827900 | organism=Plasmodium_falciparum_3D7 | gene_product=protein disulfide isomerase | transcript_product=protein disulfide isomerase | location=Pf3D7_08_v3:1206788-1208394(-) | protein_length=483 | sequence_SO=chromosome | SO=protein_coding | is_pseudo=false	7	29	29	0	29	23.81	0.00097	11	41	41	0	41	38.1	0.00101	2	14	14	0	14	10.14	0.000526	5	17	17	0	17	20.7	0.000548	483	55514	5.8
360	0.000118	2	0.00046	1	1	PF3D7_0103900.1-p1	365	PF3D7_0103900.1-p1	| transcript=PF3D7_0103900.1 | gene=PF3D7_0103900 | organism=Plasmodium_falciparum_3D7 | gene_product=parasite-infected erythrocyte surface protein | transcript_product=parasite-infected erythrocyte surface protein | location=Pf3D7_01_v3:172864-174591(+) | protein_length=575 | sequence_SO=chromosome | SO=protein_coding | is_pseudo=false	1	4	4	0	4	1.91	0.000112	3	6	6	0	6	3.83	0.000124	X	X	X	X	X	X	X	7	17	17	0	17	11.48	0.00046	575	67802	9.1
361	3.3e-05	2	0	0	1	PF3D7_1228800.1-p1	367	PF3D7_1228800.1-p1	| transcript=PF3D7_1228800.1 | gene=PF3D7_1228800 | organism=Plasmodium_falciparum_3D7 | gene_product=WD repeat-containing protein, putative | transcript_product=WD repeat-containing protein, putative | location=Pf3D7_12_v3:1169557-1179186(-) | protein_length=3209 | sequence_SO=chromosome | SO=protein_coding | is_pseudo=false	3	8	8	0	8	1.18	4.03e-05	2	7	7	0	7	0.84	2.6e-05	X	X	X	X	X	X	X	X	X	X	X	X	X	X	3209	378912	8.9
362	6.5e-05	2	0.000163	1	1	PF3D7_1223400.1-p1	368	PF3D7_1223400.1-p1	| transcript=PF3D7_1223400.1 | gene=PF3D7_1223400 | organism=Plasmodium_falciparum_3D7 | gene_product=phospholipid-transporting ATPase, putative | transcript_product=phospholipid-transporting ATPase, putative | location=Pf3D7_12_v3:941125-946745(+) | protein_length=1618 | sequence_SO=chromosome | SO=protein_coding | is_pseudo=false	1	5	5	0	5	1.42	4.99e-05	5	11	11	0	11	3.71	8.09e-05	X	X	X	X	X	X	X	6	17	17	0	17	4.64	0.000163	1618	190445	8.6
363	0.00025	1	0.000421	2	1	PF3D7_1302800.1-p1	369	PF3D7_1302800.1-p1	| transcript=PF3D7_1302800.1 | gene=PF3D7_1302800 | organism=Plasmodium_falciparum_3D7 | gene_product=40S ribosomal protein S7, putative | transcript_product=40S ribosomal protein S7, putative | location=Pf3D7_13_v3:150783-151635(-) | protein_length=194 | sequence_SO=chromosome | SO=protein_coding | is_pseudo=false	2	3	3	0	3	15.46	0.00025	X	X	X	X	X	X	X	2	3	3	0	3	15.46	0.000281	1	7	7	0	7	4.12	0.000561	194	22481	9.8
366	3.6e-05	1	0	0	1	PF3D7_1241200.1-p1	372	PF3D7_1241200.1-p1	| transcript=PF3D7_1241200.1 | gene=PF3D7_1241200 | organism=Plasmodium_falciparum_3D7 | gene_product=conserved Plasmodium protein, unknown function | transcript_product=conserved Plasmodium protein, unknown function | location=Pf3D7_12_v3:1748873-1756237(-) | protein_length=2309 | sequence_SO=chromosome | SO=protein_coding | is_pseudo=false	X	X	X	X	X	X	X	2	7	7	0	7	1.99	3.61e-05	X	X	X	X	X	X	X	X	X	X	X	X	X	X	2309	276530	8.2
367	5.1e-05	1	0	0	1	PF3D7_1410600.1-p1	374	PF3D7_1410600.1-p1	| transcript=PF3D7_1410600.1 | gene=PF3D7_1410600 | organism=Plasmodium_falciparum_3D7 | gene_product=eukaryotic translation initiation factor 2 subunit gamma, putative | transcript_product=eukaryotic translation initiation factor 2 subunit gamma, putative | location=Pf3D7_14_v3:427191-428588(+) | protein_length=465 | sequence_SO=chromosome | SO=protein_coding | is_pseudo=false	X	X	X	X	X	X	X	1	2	2	0	2	3.01	5.12e-05	X	X	X	X	X	X	X	X	X	X	X	X	X	X	465	51245	8
368	0.000392	1	0.000377	1	1	PF3D7_0517000.1-p1	375	PF3D7_0517000.1-p1	| transcript=PF3D7_0517000.1 | gene=PF3D7_0517000 | organism=Plasmodium_falciparum_3D7 | gene_product=60S ribosomal protein L12, putative | transcript_product=60S ribosomal protein L12, putative | location=Pf3D7_05_v3:715765-716675(-) | protein_length=165 | sequence_SO=chromosome | SO=protein_coding | is_pseudo=false	1	4	4	0	4	11.52	0.000392	X	X	X	X	X	X	X	X	X	X	X	X	X	X	2	4	4	0	4	16.97	0.000377	165	18112	9.5
369	2e-05	2	2.4e-05	1	1	PF3D7_0611800.1-p1	376	PF3D7_0611800.1-p1	| transcript=PF3D7_0611800.1 | gene=PF3D7_0611800 | organism=Plasmodium_falciparum_3D7 | gene_product=conserved Plasmodium protein, unknown function | transcript_product=conserved Plasmodium protein, unknown function | location=Pf3D7_06_v3:490858-501140(-) | protein_length=3248 | sequence_SO=chromosome | SO=protein_coding | is_pseudo=false	2	5	5	0	5	0.74	2.49e-05	2	4	4	0	4	0.74	1.47e-05	X	X	X	X	X	X	X	2	5	5	0	5	0.74	2.4e-05	3248	374892	5.8
370	0.000172	2	0.000259	2	1	PF3D7_1472300.1-p1	377	PF3D7_1472300.1-p1	| transcript=PF3D7_1472300.1 | gene=PF3D7_1472300 | organism=Plasmodium_falciparum_3D7 | gene_product=conserved protein, unknown function | transcript_product=conserved protein, unknown function | location=Pf3D7_14_v3:2954108-2957108(+) | protein_length=535 | sequence_SO=chromosome | SO=protein_coding | is_pseudo=false	1	4	4	0	4	3.55	0.000121	1	10	10	0	10	3.55	0.000222	1	5	5	0	5	3.55	0.00017	1	12	12	0	12	3.55	0.000349	535	64420	8.8
371	0.005241	2	0.002232	2	1	PF3D7_0818200.1-p1	378	PF3D7_0818200.1-p1	| transcript=PF3D7_0818200.1 | gene=PF3D7_0818200 | organism=Plasmodium_falciparum_3D7 | gene_product=14-3-3 protein | transcript_product=14-3-3 protein | location=Pf3D7_08_v3:830006-831454(+) | protein_length=262 | sequence_SO=chromosome | SO=protein_coding | is_pseudo=false	14	61	61	0	61	60.69	0.00376	15	148	146	2	148	61.07	0.006723	10	31	31	0	31	49.24	0.002148	11	39	39	0	39	61.07	0.002316	262	30193	4.9
372	8.8e-05	2	0.000313	2	1	PF3D7_1334500.1-p1	379	PF3D7_1334500.1-p1	| transcript=PF3D7_1334500.1 | gene=PF3D7_1334500 | organism=Plasmodium_falciparum_3D7 | gene_product=MSP7-like protein | transcript_product=MSP7-like protein | location=Pf3D7_13_v3:1405731-1407512(-) | protein_length=593 | sequence_SO=chromosome | SO=protein_coding | is_pseudo=false	2	5	5	0	5	4.72	0.000136	1	2	2	0	2	2.53	4.01e-05	2	5	5	0	5	5.73	0.000153	7	18	18	0	18	17.03	0.000472	593	70661	5.1
373	0.000393	2	3.8e-05	1	1	PF3D7_1342600.1-p1	380	PF3D7_1342600.1-p1	| transcript=PF3D7_1342600.1 | gene=PF3D7_1342600 | organism=Plasmodium_falciparum_3D7 | gene_product=myosin A | transcript_product=myosin A | location=Pf3D7_13_v3:1673699-1676539(+) | protein_length=818 | sequence_SO=chromosome | SO=protein_coding | is_pseudo=false	7	28	28	0	28	13.94	0.000553	6	16	16	0	16	12.59	0.000233	X	X	X	X	X	X	X	2	2	2	0	2	3.79	3.81e-05	818	92277	8.2
374	7e-05	1	0.000535	2	1	PF3D7_0532300.1-p1	381	PF3D7_0532300.1-p1	| transcript=PF3D7_0532300.1 | gene=PF3D7_0532300 | organism=Plasmodium_falciparum_3D7 | gene_product=Plasmodium exported protein (PHISTb), unknown function | transcript_product=Plasmodium exported protein (PHISTb), unknown function | location=Pf3D7_05_v3:1308278-1309940(+) | protein_length=509 | sequence_SO=chromosome | SO=protein_coding | is_pseudo=false	X	X	X	X	X	X	X	1	3	3	0	3	3.14	7.01e-05	3	6	6	0	6	8.64	0.000214	8	28	28	0	28	20.24	0.000856	509	60188	5.1
375	9.8e-05	1	0	0	1	PF3D7_1351700.1-p1	382	PF3D7_1351700.1-p1	| transcript=PF3D7_1351700.1 | gene=PF3D7_1351700 | organism=Plasmodium_falciparum_3D7 | gene_product=inner membrane complex protein 1f, putative | transcript_product=inner membrane complex protein 1f, putative | location=Pf3D7_13_v3:2059616-2063924(+) | protein_length=1318 | sequence_SO=chromosome | SO=protein_coding | is_pseudo=false	3	8	8	0	8	2.73	9.8e-05	X	X	X	X	X	X	X	X	X	X	X	X	X	X	X	X	X	X	X	X	X	1318	151517	8.8
377	0.000245	2	0	0	1	PF3D7_1212000.1-p1	384	PF3D7_1212000.1-p1	| transcript=PF3D7_1212000.1 | gene=PF3D7_1212000 | organism=Plasmodium_falciparum_3D7 | gene_product=glutathione peroxidase-like thioredoxin peroxidase | transcript_product=glutathione peroxidase-like thioredoxin peroxidase | location=Pf3D7_12_v3:534912-535915(-) | protein_length=205 | sequence_SO=chromosome | SO=protein_coding | is_pseudo=false	2	4	4	0	4	18.05	0.000315	2	3	3	0	3	18.05	0.000174	X	X	X	X	X	X	X	X	X	X	X	X	X	X	205	23953	8.9
378	1.1e-05	1	0	0	1	PF3D7_0705500.1-p1	385	PF3D7_0705500.1-p1	| transcript=PF3D7_0705500.1 | gene=PF3D7_0705500 | organism=Plasmodium_falciparum_3D7 | gene_product=inositol-phosphate phosphatase, putative | transcript_product=inositol-phosphate phosphatase, putative | location=Pf3D7_07_v3:270022-278706(-) | protein_length=2814 | sequence_SO=chromosome | SO=protein_coding | is_pseudo=false	1	2	2	0	2	0.71	1.15e-05	X	X	X	X	X	X	X	X	X	X	X	X	X	X	X	X	X	X	X	X	X	2814	330702	7.4
379	5.1e-05	1	0	0	1	PF3D7_0309300.1-p1	386	PF3D7_0309300.1-p1	| transcript=PF3D7_0309300.1 | gene=PF3D7_0309300 | organism=Plasmodium_falciparum_3D7 | gene_product=N2227-like protein, putative | transcript_product=N2227-like protein, putative | location=Pf3D7_03_v3:397649-400516(+) | protein_length=955 | sequence_SO=chromosome | SO=protein_coding | is_pseudo=false	1	3	3	0	3	2.51	5.07e-05	X	X	X	X	X	X	X	X	X	X	X	X	X	X	X	X	X	X	X	X	X	955	112248	5.4
382	0.000164	2	0.0002	2	1	PF3D7_1444300.1-p1	389	PF3D7_1444300.1-p1	| transcript=PF3D7_1444300.1 | gene=PF3D7_1444300 | organism=Plasmodium_falciparum_3D7 | gene_product=1-acyl-sn-glycerol-3-phosphate acyltransferase, putative | transcript_product=1-acyl-sn-glycerol-3-phosphate acyltransferase, putative | location=Pf3D7_14_v3:1828579-1829962(+) | protein_length=292 | sequence_SO=chromosome | SO=protein_coding | is_pseudo=false	1	3	3	0	3	6.85	0.000166	1	4	4	0	4	6.85	0.000163	2	3	3	0	3	17.47	0.000187	1	4	4	0	4	6.85	0.000213	292	33747	9.2
383	4e-05	2	1.8e-05	1	1	PF3D7_0729100.1-p1	390	PF3D7_0729100.1-p1	| transcript=PF3D7_0729100.1 | gene=PF3D7_0729100 | organism=Plasmodium_falciparum_3D7 | gene_product=conserved Plasmodium protein, unknown function | transcript_product=conserved Plasmodium protein, unknown function | location=Pf3D7_07_v3:1238446-1246188(+) | protein_length=2580 | sequence_SO=chromosome | SO=protein_coding | is_pseudo=false	3	9	9	0	9	1.74	5.63e-05	2	5	5	0	5	1.51	2.31e-05	X	X	X	X	X	X	X	1	3	3	0	3	0.93	1.81e-05	2580	304520	5.3
384	0.000101	2	0.000174	1	1	PF3D7_0321500.1-p1	392	PF3D7_0321500.1-p1	| transcript=PF3D7_0321500.1 | gene=PF3D7_0321500 | organism=Plasmodium_falciparum_3D7 | gene_product=peptidase, putative | transcript_product=peptidase, putative | location=Pf3D7_03_v3:896546-899770(-) | protein_length=1074 | sequence_SO=chromosome | SO=protein_coding | is_pseudo=false	1	12	12	0	12	0.84	0.00018	1	2	2	0	2	1.12	2.22e-05	X	X	X	X	X	X	X	1	12	12	0	12	0.84	0.000174	1074	125893	6.6
387	0	0	0.001335	2	1	PF3D7_0423700.1-p1	395	PF3D7_0423700.1-p1	| transcript=PF3D7_0423700.1 | gene=PF3D7_0423700 | organism=Plasmodium_falciparum_3D7 | gene_product=early transcribed membrane protein 4 | transcript_product=early transcribed membrane protein 4 | location=Pf3D7_04_v3:1071435-1071845(-) | protein_length=136 | sequence_SO=chromosome | SO=protein_coding | is_pseudo=false	X	X	X	X	X	X	X	X	X	X	X	X	X	X	2	2	2	0	2	11.76	0.000267	1	21	21	0	21	12.5	0.002403	136	14891	9.4
388	0.00012	1	7.7e-05	2	1	PF3D7_0528800.1-p1	396	PF3D7_0528800.1-p1	| transcript=PF3D7_0528800.1 | gene=PF3D7_0528800 | organism=Plasmodium_falciparum_3D7 | gene_product=nucleolar preribosomal GTPase, putative | transcript_product=nucleolar preribosomal GTPase, putative | location=Pf3D7_05_v3:1180425-1182038(-) | protein_length=537 | sequence_SO=chromosome | SO=protein_coding | is_pseudo=false	2	4	4	0	4	3.72	0.00012	X	X	X	X	X	X	X	1	2	2	0	2	1.86	6.76e-05	2	3	3	0	3	3.72	8.69e-05	537	63934	9.5
389	0.00022	1	0	0	1	PF3D7_0522800.1-p1	397	PF3D7_0522800.1-p1	| transcript=PF3D7_0522800.1 | gene=PF3D7_0522800 | organism=Plasmodium_falciparum_3D7 | gene_product=pre-mRNA-splicing factor BUD31, putative | transcript_product=pre-mRNA-splicing factor BUD31, putative | location=Pf3D7_05_v3:944184-944931(-) | protein_length=147 | sequence_SO=chromosome | SO=protein_coding | is_pseudo=false	1	2	2	0	2	9.52	0.00022	X	X	X	X	X	X	X	X	X	X	X	X	X	X	X	X	X	X	X	X	X	147	17389	8.9
391	3.8e-05	2	2.3e-05	1	1	PF3D7_1123500.1-p1	399	PF3D7_1123500.1-p1	| transcript=PF3D7_1123500.1 | gene=PF3D7_1123500 | organism=Plasmodium_falciparum_3D7 | gene_product=golgi protein 2 | transcript_product=golgi protein 2 | location=Pf3D7_11_v3:929354-933364(-) | protein_length=1336 | sequence_SO=chromosome | SO=protein_coding | is_pseudo=false	3	4	4	0	4	3.82	4.84e-05	2	3	3	0	3	1.87	2.67e-05	X	X	X	X	X	X	X	1	2	2	0	2	0.82	2.33e-05	1336	153698	7.2
392	7.5e-05	2	9e-05	2	2	PF3D7_1411100.1-p1;PF3D7_1411100.2-p1	400	PF3D7_1411100.1-p1	0 genes:. 2 proteins in this group did not match any genes. PF3D7_1411100.1-p1:| transcript=PF3D7_1411100.1 | gene=PF3D7_1411100 | organism=Plasmodium_falciparum_3D7 | gene_product=conserved Plasmodium membrane protein, unknown function, unspecified product | transcript_product=conserved Plasmodium membrane protein, unknown function | location=Pf3D7_14_v3:447923-449968(-) | protein_length=373 | s…	1	2	2	0	2	3.75	8.66e-05	1	2	2	0	2	3.75	6.38e-05	1	2	2	0	2	3.75	9.73e-05	1	2	2	0	2	3.75	8.34e-05	373	44219	7.4
394	1.5e-05	2	3e-05	2	1	PF3D7_0817300.1-p1	402	PF3D7_0817300.1-p1	| transcript=PF3D7_0817300.1 | gene=PF3D7_0817300 | organism=Plasmodium_falciparum_3D7 | gene_product=conserved Plasmodium protein, unknown function | transcript_product=conserved Plasmodium protein, unknown function | location=Pf3D7_08_v3:782909-789616(-) | protein_length=2235 | sequence_SO=chromosome | SO=protein_coding | is_pseudo=false	1	2	2	0	2	0.63	1.45e-05	2	3	3	0	3	1.21	1.6e-05	2	3	3	0	3	1.07	2.44e-05	2	5	5	0	5	1.21	3.48e-05	2235	254753	5.2
395	0.000423	2	0.000628	1	1	PF3D7_1010700.1-p1	403	PF3D7_1010700.1-p1	| transcript=PF3D7_1010700.1 | gene=PF3D7_1010700 | organism=Plasmodium_falciparum_3D7 | gene_product=dolichyl-phosphate-mannose--protein mannosyltransferase, putative | transcript_product=dolichyl-phosphate-mannose--protein mannosyltransferase, putative | location=Pf3D7_10_v3:422961-424365(+) | protein_length=223 | sequence_SO=chromosome | SO=protein_coding | is_pseudo=false	2	8	8	0	8	18.39	0.000579	2	5	5	0	5	15.7	0.000267	X	X	X	X	X	X	X	2	9	9	0	9	15.7	0.000628	223	25678	7
398	7e-06	1	0	0	1	PF3D7_0724700.1-p1	406	PF3D7_0724700.1-p1	| transcript=PF3D7_0724700.1 | gene=PF3D7_0724700 | organism=Plasmodium_falciparum_3D7 | gene_product=conserved Plasmodium protein, unknown function | transcript_product=conserved Plasmodium protein, unknown function | location=Pf3D7_07_v3:1034969-1046109(-) | protein_length=3489 | sequence_SO=chromosome | SO=protein_coding | is_pseudo=false	X	X	X	X	X	X	X	1	2	2	0	2	0.32	6.82e-06	X	X	X	X	X	X	X	X	X	X	X	X	X	X	3489	420677	8.5
402	0	0	0	0	1	PF3D7_1125500.1-p1	410	PF3D7_1125500.1-p1	| transcript=PF3D7_1125500.1 | gene=PF3D7_1125500 | organism=Plasmodium_falciparum_3D7 | gene_product=small nuclear ribonucleoprotein Sm D1, putative | transcript_product=small nuclear ribonucleoprotein Sm D1, putative | location=Pf3D7_11_v3:1001182-1001562(-) | protein_length=126 | sequence_SO=chromosome | SO=protein_coding | is_pseudo=false	X	X	X	X	X	X	X	X	X	X	X	X	X	X	X	X	X	X	X	X	X	X	X	X	X	X	X	X	126	14337	10.2
403	2.6e-05	2	2e-05	1	1	PF3D7_0703500.1-p1	411	PF3D7_0703500.1-p1	| transcript=PF3D7_0703500.1 | gene=PF3D7_0703500 | organism=Plasmodium_falciparum_3D7 | gene_product=erythrocyte membrane-associated antigen | transcript_product=erythrocyte membrane-associated antigen | location=Pf3D7_07_v3:135606-142505(+) | protein_length=2299 | sequence_SO=chromosome | SO=protein_coding | is_pseudo=false	2	6	6	0	6	1.48	4.22e-05	1	2	2	0	2	0.57	1.04e-05	X	X	X	X	X	X	X	2	3	3	0	3	1.48	2.03e-05	2299	264915	8.6
405	0.000338	1	0.000221	1	1	PF3D7_1304500.1-p1	413	PF3D7_1304500.1-p1	| transcript=PF3D7_1304500.1 | gene=PF3D7_1304500 | organism=Plasmodium_falciparum_3D7 | gene_product=small heat shock protein, putative | transcript_product=small heat shock protein, putative | location=Pf3D7_13_v3:235800-236435(-) | protein_length=211 | sequence_SO=chromosome | SO=protein_coding | is_pseudo=false	X	X	X	X	X	X	X	3	6	6	0	6	11.85	0.000338	X	X	X	X	X	X	X	2	3	3	0	3	11.85	0.000221	211	25195	6.4
406	7.9e-05	2	5.1e-05	1	1	PF3D7_1311900.1-p1	414	PF3D7_1311900.1-p1	| transcript=PF3D7_1311900.1 | gene=PF3D7_1311900 | organism=Plasmodium_falciparum_3D7 | gene_product=V-type proton ATPase catalytic subunit A | transcript_product=V-type proton ATPase catalytic subunit A | location=Pf3D7_13_v3:507900-509735(+) | protein_length=611 | sequence_SO=chromosome | SO=protein_coding | is_pseudo=false	1	3	3	0	3	1.8	7.93e-05	3	4	4	0	4	4.58	7.79e-05	X	X	X	X	X	X	X	1	2	2	0	2	1.8	5.09e-05	611	68576	5.7
408	0.000921	2	0.000415	2	1	PF3D7_1351400.1-p1	416	PF3D7_1351400.1-p1	| transcript=PF3D7_1351400.1 | gene=PF3D7_1351400 | organism=Plasmodium_falciparum_3D7 | gene_product=60S ribosomal protein L17, putative | transcript_product=60S ribosomal protein L17, putative | location=Pf3D7_13_v3:2052108-2053384(+) | protein_length=203 | sequence_SO=chromosome | SO=protein_coding | is_pseudo=false	3	18	18	0	18	15.76	0.001432	3	7	7	0	7	15.76	0.00041	2	5	5	0	5	3.94	0.000447	4	5	5	0	5	19.7	0.000383	203	23415	10.9
410	3.8e-05	1	7.3e-05	1	1	PF3D7_1437200.1-p1	418	PF3D7_1437200.1-p1	| transcript=PF3D7_1437200.1 | gene=PF3D7_1437200 | organism=Plasmodium_falciparum_3D7 | gene_product=ribonucleoside-diphosphate reductase large subunit, putative | transcript_product=ribonucleoside-diphosphate reductase large subunit, putative | location=Pf3D7_14_v3:1507359-1510089(-) | protein_length=847 | sequence_SO=chromosome | SO=protein_coding | is_pseudo=false	1	2	2	0	2	1.65	3.81e-05	X	X	X	X	X	X	X	X	X	X	X	X	X	X	4	4	4	0	4	5.31	7.35e-05	847	96904	7.2
411	0	0	0	0	1	PF3D7_1309500.1-p1	419	PF3D7_1309500.1-p1	| transcript=PF3D7_1309500.1 | gene=PF3D7_1309500 | organism=Plasmodium_falciparum_3D7 | gene_product=H/ACA ribonucleoprotein complex subunit 1, putative | transcript_product=H/ACA ribonucleoprotein complex subunit 1, putative | location=Pf3D7_13_v3:436676-437305(-) | protein_length=209 | sequence_SO=chromosome | SO=protein_coding | is_pseudo=false	X	X	X	X	X	X	X	X	X	X	X	X	X	X	X	X	X	X	X	X	X	X	X	X	X	X	X	X	209	24981	10.2
413	0.000303	2	0.000271	1	1	PF3D7_1463200.1-p1	421	PF3D7_1463200.1-p1	| transcript=PF3D7_1463200.1 | gene=PF3D7_1463200 | organism=Plasmodium_falciparum_3D7 | gene_product=replication factor C subunit 3, putative | transcript_product=replication factor C subunit 3, putative | location=Pf3D7_14_v3:2570434-2571719(+) | protein_length=344 | sequence_SO=chromosome | SO=protein_coding | is_pseudo=false	2	7	7	0	7	10.47	0.000329	2	8	8	0	8	10.47	0.000277	X	X	X	X	X	X	X	2	6	6	0	6	10.47	0.000271	344	39232	7.1
414	0	0	0	0	1	PF3D7_0705300.1-p1	422	PF3D7_0705300.1-p1	| transcript=PF3D7_0705300.1 | gene=PF3D7_0705300 | organism=Plasmodium_falciparum_3D7 | gene_product=origin recognition complex subunit 2 | transcript_product=origin recognition complex subunit 2 | location=Pf3D7_07_v3:261977-264454(+) | protein_length=825 | sequence_SO=chromosome | SO=protein_coding | is_pseudo=false	X	X	X	X	X	X	X	X	X	X	X	X	X	X	X	X	X	X	X	X	X	X	X	X	X	X	X	X	825	98010	5.8
417	2.2e-05	2	0	0	1	PF3D7_1447800.1-p1	425	PF3D7_1447800.1-p1	| transcript=PF3D7_1447800.1 | gene=PF3D7_1447800 | organism=Plasmodium_falciparum_3D7 | gene_product=calponin homology domain-containing protein, putative | transcript_product=calponin homology domain-containing protein, putative | location=Pf3D7_14_v3:1947246-1953206(+) | protein_length=1986 | sequence_SO=chromosome | SO=protein_coding | is_pseudo=false	2	4	4	0	4	2.06	3.25e-05	1	2	2	0	2	0.45	1.2e-05	X	X	X	X	X	X	X	X	X	X	X	X	X	X	1986	238050	6.8
[truncated: 441 more rows]
