# Supplementary material for: PfMORC protein regulates chromatin accessibility and transcriptional repression in the human malaria parasite, Plasmodium falciparum
Source: eLife. 2024 Dec 5;12:RP92499. doi: 10.7554/eLife.92499 (PMC11620747; doi:10.7554/eLife.92499)
Supplement: Supplementary file 4. — Results were obtained at (a) ring stages, (b) trophozoite stages, and (c) schizont stages of cell progression. [file elife-92499-supp4.xlsx]

## Sheet: File_4a_ChIPseq_ring_peak_calli
Supplementary File 4a: Peak calling result of PfMORC ChIP-seq in ring stage.
chrom	start	end	name	score	strand	signalValue	pValue	qValue	annotation 1	gene name 1	gene description 1	annotation 2	gene name 2	gene description 2
Pf3D7_01_v3	27087	27406	Ring_H3K4_peak_1	253	.	4.88357	28.3061	25.3539	intergenic
Pf3D7_01_v3	29414	30857	Ring_H3K4_peak_2	27	.	2.07665	4.8906	2.74347	PF3D7_0100100	VAR	erythrocyte membrane protein 1, PfEMP1
Pf3D7_01_v3	31442	32293	Ring_H3K4_peak_3	16	.	1.89833	3.68563	1.69217	intergenic
Pf3D7_01_v3	32986	33274	Ring_H3K4_peak_4	14	.	1.8409	3.36444	1.43863	intergenic
Pf3D7_01_v3	34091	34822	Ring_H3K4_peak_5	257	.	4.42792	28.6342	25.7002	intergenic
Pf3D7_01_v3	39112	39567	Ring_H3K4_peak_6	13	.	1.91812	3.32039	1.39762	PF3D7_0100200	RIF	rifin
Pf3D7_01_v3	46234	46465	Ring_H3K4_peak_7	15	.	1.86207	3.47445	1.52841	intergenic
Pf3D7_01_v3	60404	60922	Ring_H3K4_peak_8	18	.	1.97151	3.90915	1.86596	PF3D7_0100800	RIF	rifin
Pf3D7_01_v3	81942	82519	Ring_H3K4_peak_9	15	.	1.89573	3.51956	1.55921	PF3D7_0101600	RIF	rifin
Pf3D7_01_v3	118975	119552	Ring_H3K4_peak_10	14	.	1.83215	3.34981	1.42478	PF3D7_0102600	FIKK1	serine/threonine protein kinase, FIKK family
Pf3D7_01_v3	148429	148775	Ring_H3K4_peak_11	21	.	2.07427	4.20838	2.13	intergenic
Pf3D7_01_v3	174251	174471	Ring_H3K4_peak_12	32	.	2.27199	5.4596	3.22933	intergenic
Pf3D7_01_v3	217172	217525	Ring_H3K4_peak_13	12	.	1.82054	3.06154	1.21355	intergenic
Pf3D7_01_v3	312424	312701	Ring_H3K4_peak_14	47	.	2.4501	7.08946	4.72817	intergenic
Pf3D7_01_v3	317311	317578	Ring_H3K4_peak_15	14	.	1.78959	3.38473	1.45321	intergenic
Pf3D7_01_v3	363390	363835	Ring_H3K4_peak_16	12	.	1.76358	3.11173	1.24656	intergenic
Pf3D7_01_v3	484029	484288	Ring_H3K4_peak_17	110	.	3.42712	13.71	11.076	PF3D7_0112900		Plasmodium exported protein, unknown function
Pf3D7_01_v3	513646	513918	Ring_H3K4_peak_18	11	.	1.79042	3.00892	1.17607	intergenic
Pf3D7_01_v3	527992	528449	Ring_H3K4_peak_19	29	.	2.08817	5.14678	2.95801	intergenic
Pf3D7_01_v3	592450	592967	Ring_H3K4_peak_20	18	.	1.99871	3.91896	1.8771	PF3D7_0115200	RIF	rifin
Pf3D7_01_v3	599003	599358	Ring_H3K4_peak_21	17	.	1.97059	3.72478	1.71436	PF3D7_0115400		stevor
Pf3D7_01_v3	609799	610113	Ring_H3K4_peak_22	22	.	2.00038	4.40843	2.2889	intergenic
Pf3D7_01_v3	611233	611526	Ring_H3K4_peak_23	17	.	1.89541	3.78978	1.76784	intergenic
Pf3D7_01_v3	612250	612547	Ring_H3K4_peak_24	12	.	1.71267	3.06045	1.2114	intergenic
Pf3D7_01_v3	613078	613786	Ring_H3K4_peak_25	19	.	1.94831	3.95583	1.92078	intergenic
Pf3D7_01_v3	614462	615034	Ring_H3K4_peak_26	29	.	2.13905	5.12252	2.96994	intergenic
Pf3D7_01_v3	615802	616194	Ring_H3K4_peak_27	352	.	5.66504	38.3516	35.2544	intergenic
Pf3D7_01_v3	617149	617722	Ring_H3K4_peak_28	308	.	4.93126	33.8854	30.8335	intergenic
Pf3D7_02_v3	126780	127310	Ring_H3K4_peak_29	103	.	2.54109	12.8739	10.3275	PF3D7_0202500	ETRAMP2	early transcribed membrane protein 2
Pf3D7_02_v3	218348	218678	Ring_H3K4_peak_30	12	.	1.8621	3.09978	1.23901	PF3D7_0205200		MORN repeat protein, putative
Pf3D7_02_v3	268800	269122	Ring_H3K4_peak_31	18	.	1.90331	3.88037	1.85756	PF3D7_0206600		DNA-directed RNA polymerase III subunit RPC10, putative
Pf3D7_02_v3	273814	274523	Ring_H3K4_peak_32	94	.	2.76778	11.8814	9.40315	PF3D7_0206900	MSP5	merozoite surface protein 5
Pf3D7_02_v3	276098	276331	Ring_H3K4_peak_33	20	.	1.97184	4.1685	2.08052	PF3D7_0207000	MSP4	merozoite surface protein 4
Pf3D7_02_v3	320597	320983	Ring_H3K4_peak_34	14	.	1.84599	3.43815	1.49366	intergenic
Pf3D7_02_v3	395482	395802	Ring_H3K4_peak_35	12	.	1.81739	3.15506	1.28253	intergenic
Pf3D7_02_v3	439702	440646	Ring_H3K4_peak_36	18	.	1.99292	3.85681	1.85779	intergenic
Pf3D7_02_v3	521918	522240	Ring_H3K4_peak_37	213	.	4.42016	24.2161	21.3751	PF3D7_0212600	SPATR	secreted protein with altered thrombospondin repeat domain
Pf3D7_02_v3	568944	569159	Ring_H3K4_peak_38	18	.	1.96866	3.86545	1.8293	PF3D7_0214100	SEC31	protein transport protein SEC31
Pf3D7_02_v3	569598	570170	Ring_H3K4_peak_39	23	.	2.05864	4.50731	2.38653	intergenic
Pf3D7_02_v3	622774	623467	Ring_H3K4_peak_40	11	.	1.77128	3.01721	1.17848	intergenic
Pf3D7_02_v3	632879	633158	Ring_H3K4_peak_41	103	.	2.98186	12.9116	10.3124	intergenic
Pf3D7_02_v3	738935	739190	Ring_H3K4_peak_42	17	.	1.91915	3.71598	1.72217	PF3D7_0218000	RFC2	replication factor C subunit 2, putative
Pf3D7_02_v3	767047	767335	Ring_H3K4_peak_43	12	.	1.84822	3.05715	1.21216	intergenic
Pf3D7_02_v3	776866	777339	Ring_H3K4_peak_44	27	.	2.15334	4.98252	2.7685	PF3D7_0219500		pseudouridine synthase, putative
Pf3D7_02_v3	789609	789828	Ring_H3K4_peak_45	29	.	2.13907	5.14772	2.93772	PF3D7_0219900		Plasmodium exported protein, unknown function
Pf3D7_02_v3	809608	810086	Ring_H3K4_peak_46	13	.	1.78497	3.26313	1.36086	PF3D7_0220200		Plasmodium exported protein, unknown function
Pf3D7_02_v3	816046	816363	Ring_H3K4_peak_47	97	.	3.1194	12.2891	9.72031	intergenic
Pf3D7_02_v3	843109	843359	Ring_H3K4_peak_48	16	.	1.88567	3.67655	1.67609	intergenic
Pf3D7_02_v3	848541	848884	Ring_H3K4_peak_49	11	.	1.79657	3.02197	1.18322	PF3D7_0221000		Plasmodium exported protein, unknown function
Pf3D7_02_v3	890259	890645	Ring_H3K4_peak_50	28	.	2.13202	5.01559	2.83802	PF3D7_0222500	RIF	rifin
Pf3D7_02_v3	908286	908644	Ring_H3K4_peak_51	15	.	1.93448	3.46255	1.51245	PF3D7_0223200	RIF	rifin	PF3D7_0223300		erythrocyte membrane protein 1 (PfEMP1), exon 2
Pf3D7_02_v3	920399	921465	Ring_H3K4_peak_52	12	.	1.79109	3.16734	1.29064	intergenic
Pf3D7_02_v3	921985	923792	Ring_H3K4_peak_53	41	.	2.27048	6.33068	4.17856	intergenic
Pf3D7_02_v3	926015	926232	Ring_H3K4_peak_54	51	.	2.62683	7.49936	5.10869	intergenic
Pf3D7_03_v3	34418	34844	Ring_H3K4_peak_55	306	.	5.28205	33.7004	30.6569	intergenic
Pf3D7_03_v3	37477	38101	Ring_H3K4_peak_56	14	.	1.80678	3.41709	1.47418	PF3D7_0300100	VAR	erythrocyte membrane protein 1, PfEMP1
Pf3D7_03_v3	39132	40961	Ring_H3K4_peak_57	30	.	2.09163	5.2903	3.07378	intergenic
Pf3D7_03_v3	46555	46760	Ring_H3K4_peak_58	15	.	1.90106	3.52393	1.55868	PF3D7_0300200	RIF	rifin
Pf3D7_03_v3	101711	102432	Ring_H3K4_peak_59	515	.	5.39047	54.7848	51.5092	intergenic
Pf3D7_03_v3	116594	117368	Ring_H3K4_peak_60	30	.	2.19398	5.20191	3.0114	intergenic
Pf3D7_03_v3	129250	129959	Ring_H3K4_peak_61	18	.	1.9376	3.89082	1.85303	intergenic
Pf3D7_03_v3	145273	145540	Ring_H3K4_peak_62	13	.	1.83241	3.27857	1.37006	PF3D7_0302700		CDGSH iron-sulfur domain-containing protein, putative
Pf3D7_03_v3	228473	228751	Ring_H3K4_peak_63	12	.	1.80362	3.04897	1.20302	intergenic
Pf3D7_03_v3	315021	315456	Ring_H3K4_peak_64	13	.	1.79095	3.2008	1.31148	PF3D7_0307200		60S ribosomal protein L7, putative
Pf3D7_03_v3	326660	327068	Ring_H3K4_peak_65	11	.	1.79372	2.98352	1.15699	intergenic
Pf3D7_03_v3	339140	339553	Ring_H3K4_peak_66	461	.	5.89316	49.4807	46.1891	PF3D7_0307900		conserved Plasmodium protein, unknown function
Pf3D7_03_v3	388088	388394	Ring_H3K4_peak_67	15	.	1.94905	3.47967	1.52765	PF3D7_0309200	ARK2	serine/threonine protein kinase ARK2, putative
Pf3D7_03_v3	402860	403205	Ring_H3K4_peak_68	19	.	1.93264	3.96128	1.93405	intergenic
Pf3D7_03_v3	482789	483008	Ring_H3K4_peak_69	28	.	2.20835	5.04978	2.84908	intergenic
Pf3D7_03_v3	487435	487669	Ring_H3K4_peak_70	18	.	2.02387	3.83885	1.80783	PF3D7_0311400	PKRP	kinase-related protein PKRP, putative
Pf3D7_03_v3	491654	494245	Ring_H3K4_peak_71	40	.	2.25088	6.25661	4.05608	intergenic
Pf3D7_03_v3	518997	519638	Ring_H3K4_peak_72	699	.	6.59418	73.6687	69.9295	intergenic
Pf3D7_03_v3	531131	531376	Ring_H3K4_peak_73	60	.	2.51243	8.448	6.0001	intergenic
Pf3D7_03_v3	531834	532100	Ring_H3K4_peak_74	50	.	2.41034	7.48409	5.09697	intergenic
Pf3D7_03_v3	541830	542160	Ring_H3K4_peak_75	11	.	1.8456	2.97477	1.14502	intergenic
Pf3D7_03_v3	612760	613145	Ring_H3K4_peak_76	13	.	1.84485	3.20366	1.31527	PF3D7_0315100	eIF4E	eukaryotic translation initiation factor 4E
Pf3D7_03_v3	614524	615029	Ring_H3K4_peak_77	25	.	2.07249	4.70196	2.55248	intergenic
Pf3D7_03_v3	641417	641686	Ring_H3K4_peak_78	12	.	1.78875	3.16679	1.28953	PF3D7_0315800		zinc finger protein, putative
Pf3D7_03_v3	677907	678476	Ring_H3K4_peak_79	13	.	1.79785	3.27117	1.36712	PF3D7_0316900		E3 ubiquitin-protein ligase, putative
Pf3D7_03_v3	685749	685987	Ring_H3K4_peak_80	27	.	2.13753	4.92163	2.74802	PF3D7_0317100	B9	6-cysteine protein
Pf3D7_03_v3	713998	714551	Ring_H3K4_peak_81	16	.	1.96623	3.62478	1.64333	intergenic
Pf3D7_03_v3	754429	754730	Ring_H3K4_peak_82	15	.	1.90045	3.45467	1.5156	intergenic
Pf3D7_03_v3	818772	819162	Ring_H3K4_peak_83	72	.	2.91207	9.75117	7.26401	intergenic
Pf3D7_03_v3	870803	872384	Ring_H3K4_peak_84	707	.	5.60234	74.473	70.7258	intergenic
Pf3D7_03_v3	917734	918182	Ring_H3K4_peak_85	13	.	1.81147	3.20609	1.31773	intergenic
Pf3D7_03_v3	936158	936734	Ring_H3K4_peak_86	14	.	1.91417	3.36169	1.43295	PF3D7_0322300	DGAT	diacylglycerol O-acyltransferase
Pf3D7_03_v3	1033093	1033422	Ring_H3K4_peak_87	17	.	1.92966	3.78682	1.76336	intergenic
Pf3D7_03_v3	1035525	1036449	Ring_H3K4_peak_88	15	.	1.77811	3.46007	1.5106	intergenic
Pf3D7_03_v3	1037165	1038379	Ring_H3K4_peak_89	43	.	2.23984	6.51196	4.31076	intergenic
Pf3D7_03_v3	1040503	1041385	Ring_H3K4_peak_90	408	.	4.95561	44.0996	40.8905	intergenic
Pf3D7_04_v3	26168	26535	Ring_H3K4_peak_91	203	.	4.40203	23.1469	20.3081	intergenic
Pf3D7_04_v3	28579	29195	Ring_H3K4_peak_92	42	.	2.39014	6.51959	4.27994	PF3D7_0400100	VAR	erythrocyte membrane protein 1, PfEMP1
Pf3D7_04_v3	29622	30103	Ring_H3K4_peak_93	21	.	2.02862	4.18758	2.11435	intergenic
Pf3D7_04_v3	30663	32701	Ring_H3K4_peak_94	29	.	2.02496	5.10344	2.96407	intergenic
Pf3D7_04_v3	33405	33705	Ring_H3K4_peak_95	13	.	1.79618	3.20395	1.31453	intergenic
Pf3D7_04_v3	47796	48316	Ring_H3K4_peak_96	53	.	2.39198	7.7278	5.31881	intergenic
Pf3D7_04_v3	49465	50992	Ring_H3K4_peak_97	30	.	2.07023	5.21016	3.01331	intergenic
Pf3D7_04_v3	52665	54365	Ring_H3K4_peak_98	22	.	1.97611	4.32341	2.24027	intergenic
Pf3D7_04_v3	56696	57108	Ring_H3K4_peak_99	11	.	1.82944	2.96557	1.14093	intergenic
Pf3D7_04_v3	60244	60731	Ring_H3K4_peak_100	25	.	2.15153	4.72138	2.59584	PF3D7_0400500	RIF	rifin
Pf3D7_04_v3	63477	63684	Ring_H3K4_peak_101	16	.	1.92815	3.66711	1.67221	PF3D7_0400700	RIF	rifin
Pf3D7_04_v3	82989	83397	Ring_H3K4_peak_102	20	.	2.01272	4.05759	2.01127	PF3D7_0401300	RIF	rifin
Pf3D7_04_v3	120525	120945	Ring_H3K4_peak_103	19	.	1.94128	4.00843	1.9575	intergenic
Pf3D7_04_v3	167434	168150	Ring_H3K4_peak_104	15	.	1.83634	3.45764	1.50988	intergenic
Pf3D7_04_v3	174550	174966	Ring_H3K4_peak_105	103	.	2.56172	12.904	10.3374	PF3D7_0403100		regulator of chromosome condensation, putative
Pf3D7_04_v3	219170	219572	Ring_H3K4_peak_106	12	.	1.8351	3.10742	1.24541	PF3D7_0403900	SET8	SET domain protein, putative
Pf3D7_04_v3	244420	244663	Ring_H3K4_peak_107	56	.	2.62319	8.12294	5.68596	PF3D7_0404600		conserved Plasmodium membrane protein, unknown function
Pf3D7_04_v3	264062	264577	Ring_H3K4_peak_108	214	.	4.10959	24.2097	21.4207	PF3D7_0404800		sporozoite-specific protein S10, putative
Pf3D7_04_v3	279780	280138	Ring_H3K4_peak_109	50	.	2.4528	7.43557	5.06451	intergenic
Pf3D7_04_v3	323626	323924	Ring_H3K4_peak_110	14	.	1.81983	3.40904	1.48227	PF3D7_0406100		V-type proton ATPase subunit B
Pf3D7_04_v3	329249	329961	Ring_H3K4_peak_111	31	.	2.13814	5.43284	3.19346	intergenic
Pf3D7_04_v3	469030	470035	Ring_H3K4_peak_112	122	.	3.18295	14.9003	12.265	PF3D7_0410300	PPM1	protein phosphatase PPM1, putative
Pf3D7_04_v3	495962	496590	Ring_H3K4_peak_113	49	.	2.31762	7.23949	4.94518	intergenic
Pf3D7_04_v3	499631	499907	Ring_H3K4_peak_114	15	.	1.84258	3.45644	1.51208	PF3D7_0411000		conserved Plasmodium protein, unknown function
Pf3D7_04_v3	504688	504922	Ring_H3K4_peak_115	15	.	1.94171	3.55302	1.58428	PF3D7_0411100	MED8	mediator of RNA polymerase II transcription subunit 8, putative	PF3D7_0411200		PP-loop family protein, putative
Pf3D7_04_v3	513207	513572	Ring_H3K4_peak_116	19	.	1.99004	3.95323	1.9144	PF3D7_0411400		DEAD box ATP-dependent RNA helicase, putative
Pf3D7_04_v3	517623	518285	Ring_H3K4_peak_117	94	.	2.8025	11.943	9.43319	PF3D7_0411700		conserved Plasmodium protein, unknown function
Pf3D7_04_v3	550318	550537	Ring_H3K4_peak_118	14	.	1.73852	3.32889	1.40835	intergenic
Pf3D7_04_v3	551975	552231	Ring_H3K4_peak_119	14	.	1.84226	3.3902	1.45872	intergenic
Pf3D7_04_v3	553553	553842	Ring_H3K4_peak_120	18	.	2.02508	3.85278	1.81773	intergenic
Pf3D7_04_v3	563824	564038	Ring_H3K4_peak_121	30	.	2.12643	5.29286	3.04848	intergenic
Pf3D7_04_v3	565474	566170	Ring_H3K4_peak_122	26	.	2.06095	4.80533	2.63468	intergenic
Pf3D7_04_v3	566645	567907	Ring_H3K4_peak_123	21	.	1.90759	4.16873	2.10492	intergenic
Pf3D7_04_v3	568999	569297	Ring_H3K4_peak_124	32	.	2.22776	5.52921	3.28595	intergenic
Pf3D7_04_v3	609463	610187	Ring_H3K4_peak_125	17	.	1.85671	3.7688	1.75332	PF3D7_0413300	RIF	rifin
Pf3D7_04_v3	612180	612935	Ring_H3K4_peak_126	31	.	2.13841	5.31392	3.12768	intergenic
Pf3D7_04_v3	636178	636601	Ring_H3K4_peak_127	73	.	2.73949	9.80732	7.33553	intergenic
Pf3D7_04_v3	697969	698371	Ring_H3K4_peak_128	23	.	2.05405	4.43187	2.3343	PF3D7_0415900		60S ribosomal protein L15, putative
Pf3D7_04_v3	709521	710046	Ring_H3K4_peak_129	24	.	2.03141	4.62109	2.48619	PF3D7_0416200		PRKR-interacting protein 1, putative	PF3D7_0416300	MCM9	DNA helicase MCM9, putative
Pf3D7_04_v3	736755	737648	Ring_H3K4_peak_130	48	.	2.27283	7.11047	4.82924	intergenic
Pf3D7_04_v3	800430	800713	Ring_H3K4_peak_131	31	.	2.12349	5.43923	3.18724	intergenic
Pf3D7_04_v3	810103	810608	Ring_H3K4_peak_132	242	.	4.6552	27.1596	24.2421	PF3D7_0418100	SOC1	protein SOC1, putative
Pf3D7_04_v3	915153	915686	Ring_H3K4_peak_133	28	.	2.10414	5.08442	2.88194	PF3D7_0420300	ApiAP2	AP2 domain transcription factor, putative
Pf3D7_04_v3	936752	937000	Ring_H3K4_peak_134	21	.	1.93015	4.21279	2.11097	intergenic
Pf3D7_04_v3	962906	965747	Ring_H3K4_peak_135	34	.	1.90394	5.6476	3.43411	intergenic
Pf3D7_04_v3	967599	968085	Ring_H3K4_peak_136	22	.	1.7525	4.34871	2.22519	PF3D7_0421200	RIF	rifin
Pf3D7_04_v3	971276	971659	Ring_H3K4_peak_137	28	.	1.82601	5.07327	2.89476	intergenic
Pf3D7_04_v3	972860	974054	Ring_H3K4_peak_138	47	.	1.97858	7.13859	4.79261	intergenic
Pf3D7_04_v3	975176	976401	Ring_H3K4_peak_139	17	.	1.95357	3.74488	1.74846	intergenic
Pf3D7_04_v3	1059145	1059852	Ring_H3K4_peak_140	14	.	1.87956	3.42475	1.48264	PF3D7_0423500	GAPM2	glideosome associated protein with multiple membrane spans 2
Pf3D7_04_v3	1111062	1111362	Ring_H3K4_peak_141	12	.	1.76993	3.06851	1.21584	intergenic
Pf3D7_04_v3	1117516	1117862	Ring_H3K4_peak_142	211	.	3.91432	24.0403	21.197	intergenic
Pf3D7_04_v3	1124166	1124376	Ring_H3K4_peak_143	33	.	2.34153	5.65068	3.37308	PF3D7_0424800		Plasmodium exported protein (PHISTb), unknown function
Pf3D7_04_v3	1133091	1133576	Ring_H3K4_peak_144	51	.	2.44083	7.55298	5.15816	intergenic
Pf3D7_04_v3	1152621	1153093	Ring_H3K4_peak_145	13	.	1.82547	3.22626	1.33066	PF3D7_0425700	RIF	rifin
Pf3D7_04_v3	1156930	1157310	Ring_H3K4_peak_146	16	.	1.88826	3.62692	1.63856	PF3D7_0425800	VAR	erythrocyte membrane protein 1, PfEMP1
Pf3D7_04_v3	1159228	1160452	Ring_H3K4_peak_147	38	.	2.21945	6.02983	3.80319	intergenic
Pf3D7_04_v3	1162450	1163020	Ring_H3K4_peak_148	19	.	1.93738	3.97104	1.93832	intergenic
Pf3D7_04_v3	1164107	1164587	Ring_H3K4_peak_149	10	.	1.72908	2.89556	1.09468	intergenic
Pf3D7_04_v3	1175209	1175628	Ring_H3K4_peak_150	17	.	1.91109	3.77648	1.77152	intergenic
Pf3D7_04_v3	1176113	1176908	Ring_H3K4_peak_151	13	.	1.84188	3.23121	1.33774	intergenic
Pf3D7_04_v3	1177566	1180390	Ring_H3K4_peak_152	28	.	2.07939	5.00817	2.85016	intergenic
Pf3D7_04_v3	1181163	1181451	Ring_H3K4_peak_153	122	.	3.53294	14.8895	12.2555	intergenic
Pf3D7_04_v3	1182374	1182890	Ring_H3K4_peak_154	273	.	4.66985	30.3401	27.3439	intergenic
Pf3D7_05_v3	23661	23934	Ring_H3K4_peak_155	36	.	2.26656	5.95543	3.65744	intergenic
Pf3D7_05_v3	24450	24655	Ring_H3K4_peak_156	17	.	1.88092	3.7348	1.72931	intergenic
Pf3D7_05_v3	25915	26290	Ring_H3K4_peak_157	35	.	2.14219	5.89283	3.59746	intergenic
Pf3D7_05_v3	30084	30394	Ring_H3K4_peak_158	14	.	1.85947	3.36441	1.44022	intergenic
Pf3D7_05_v3	66910	67117	Ring_H3K4_peak_159	30	.	2.01834	5.32233	3.08323	PF3D7_0501300	SBP1	skeleton-binding protein 1
Pf3D7_05_v3	73095	73339	Ring_H3K4_peak_160	24	.	1.90832	4.64877	2.49524	PF3D7_0501400	FIRA	interspersed repeat antigen
Pf3D7_05_v3	75092	75330	Ring_H3K4_peak_161	57	.	2.6197	8.17561	5.75614	intergenic
Pf3D7_05_v3	78378	78729	Ring_H3K4_peak_162	57	.	2.70331	8.13389	5.72482	intergenic
Pf3D7_05_v3	108862	109079	Ring_H3K4_peak_163	18	.	1.97722	3.85945	1.83733	PF3D7_0502400	MSP8	merozoite surface protein 8
Pf3D7_05_v3	157705	158155	Ring_H3K4_peak_164	12	.	1.84444	3.12973	1.26253	PF3D7_0504000	ATPase3	cation transporting P-ATPase
Pf3D7_05_v3	178004	178456	Ring_H3K4_peak_165	16	.	1.86991	3.65503	1.6579	PF3D7_0504600	BCKDHB	2-oxoisovalerate dehydrogenase subunit beta, mitochondrial, putative
Pf3D7_05_v3	240082	240876	Ring_H3K4_peak_166	25	.	2.1009	4.6588	2.50419	intergenic
Pf3D7_05_v3	295460	295781	Ring_H3K4_peak_167	15	.	1.84557	3.55241	1.59149	intergenic
Pf3D7_05_v3	333028	333373	Ring_H3K4_peak_168	17	.	1.89328	3.75174	1.7635	intergenic
Pf3D7_05_v3	451232	451513	Ring_H3K4_peak_169	84	.	2.79789	10.9438	8.40604	intergenic
Pf3D7_05_v3	467742	468001	Ring_H3K4_peak_170	27	.	2.02559	4.89582	2.70694	PF3D7_0511000	TCTP	translationally-controlled tumor protein homolog
Pf3D7_05_v3	518302	518513	Ring_H3K4_peak_171	18	.	1.92339	3.94216	1.88521	PF3D7_0511700	CGI121	EKC/KEOPS complex subunit CGI121
Pf3D7_05_v3	530028	530527	Ring_H3K4_peak_172	16	.	1.91383	3.6109	1.63894	PF3D7_0512200	GS	glutathione synthetase
Pf3D7_05_v3	569336	569607	Ring_H3K4_peak_173	25	.	2.0103	4.76375	2.58996	PF3D7_0513300	PNP	purine nucleoside phosphorylase
Pf3D7_05_v3	609506	609762	Ring_H3K4_peak_174	22	.	2.08284	4.33011	2.25685	PF3D7_0514700		MORN repeat protein, putative
Pf3D7_05_v3	634313	635393	Ring_H3K4_peak_175	23	.	2.02565	4.48647	2.36839	intergenic
Pf3D7_05_v3	638348	638770	Ring_H3K4_peak_176	19	.	2.00086	3.94168	1.91381	intergenic
Pf3D7_05_v3	712894	713194	Ring_H3K4_peak_177	19	.	1.9324	3.99727	1.93999	PF3D7_0516900	RPL2	60S ribosomal protein L2
Pf3D7_05_v3	720914	721175	Ring_H3K4_peak_178	10	.	1.73299	2.89482	1.09143	PF3D7_0517200		conserved Plasmodium protein, unknown function
Pf3D7_05_v3	725340	725618	Ring_H3K4_peak_179	22	.	2.00298	4.39465	2.27558	intergenic
Pf3D7_05_v3	764583	765301	Ring_H3K4_peak_180	12	.	1.82511	3.12945	1.26137	intergenic
Pf3D7_05_v3	797281	797503	Ring_H3K4_peak_181	34	.	2.27245	5.77094	3.48952	PF3D7_0519400	RPS24	40S ribosomal protein S24
Pf3D7_05_v3	815818	816086	Ring_H3K4_peak_182	88	.	2.59705	11.3407	8.8069	PF3D7_0519700		FoP domain-containing protein, putative
Pf3D7_05_v3	818562	818767	Ring_H3K4_peak_183	25	.	2.14382	4.76647	2.5985	intergenic
Pf3D7_05_v3	820789	821104	Ring_H3K4_peak_184	17	.	1.91988	3.76993	1.76979	intergenic
Pf3D7_05_v3	903086	903468	Ring_H3K4_peak_185	13	.	1.81357	3.29055	1.38362	intergenic
Pf3D7_05_v3	996177	996707	Ring_H3K4_peak_186	19	.	1.96092	3.95764	1.90929	PF3D7_0524000	KASbeta	karyopherin beta
Pf3D7_05_v3	1074330	1074641	Ring_H3K4_peak_187	17	.	2.00472	3.80939	1.78106	intergenic
Pf3D7_05_v3	1096409	1096763	Ring_H3K4_peak_188	76	.	2.86997	10.1518	7.66147	intergenic
Pf3D7_05_v3	1104353	1104914	Ring_H3K4_peak_189	223	.	4.06694	25.2142	22.3819	intergenic
Pf3D7_05_v3	1112046	1112343	Ring_H3K4_peak_190	33	.	2.10733	5.65691	3.39999	intergenic
Pf3D7_05_v3	1150103	1150389	Ring_H3K4_peak_191	109	.	2.75324	13.5474	10.9341	intergenic
Pf3D7_05_v3	1151147	1151433	Ring_H3K4_peak_192	98	.	2.8285	12.4723	9.88322	intergenic
Pf3D7_05_v3	1160993	1161222	Ring_H3K4_peak_193	11	.	1.74928	2.96138	1.13882	intergenic
Pf3D7_05_v3	1178299	1178573	Ring_H3K4_peak_194	22	.	2.0483	4.37799	2.28815	PF3D7_0528700	CYP23	peptidyl-prolyl cis-trans isomerase
Pf3D7_05_v3	1208299	1208529	Ring_H3K4_peak_195	97	.	2.94711	12.3499	9.76442	PF3D7_0529700		heptatricopeptide repeat-containing protein, putative
Pf3D7_05_v3	1288778	1289250	Ring_H3K4_peak_196	252	.	4.70175	28.2192	25.2814	intergenic
Pf3D7_05_v3	1291700	1292160	Ring_H3K4_peak_197	127	.	3.5714	15.3753	12.7663	intergenic
Pf3D7_05_v3	1296455	1297201	Ring_H3K4_peak_198	439	.	5.24602	47.1499	43.9279	intergenic
Pf3D7_05_v3	1297703	1298158	Ring_H3K4_peak_199	33	.	2.13866	5.58123	3.34846	intergenic
Pf3D7_05_v3	1300218	1300575	Ring_H3K4_peak_200	179	.	3.23016	20.7299	17.9535	PF3D7_0532100	ETRAMP5	early transcribed membrane protein 5
Pf3D7_05_v3	1301369	1301833	Ring_H3K4_peak_201	23	.	1.91587	4.48472	2.35775	intergenic
Pf3D7_05_v3	1306881	1307557	Ring_H3K4_peak_202	41	.	2.25524	6.42434	4.17886	PF3D7_0532300		Plasmodium exported protein (PHISTb), unknown function
Pf3D7_05_v3	1326840	1327286	Ring_H3K4_peak_203	16	.	1.92512	3.67193	1.68024	PF3D7_0532900	RIF	rifin
Pf3D7_05_v3	1334856	1335096	Ring_H3K4_peak_204	28	.	2.10906	5.10623	2.88897	intergenic
Pf3D7_05_v3	1335723	1337194	Ring_H3K4_peak_205	18	.	1.89366	3.91645	1.88478	intergenic
Pf3D7_05_v3	1337716	1338207	Ring_H3K4_peak_206	11	.	1.7576	2.96153	1.13959	intergenic
Pf3D7_05_v3	1339165	1340512	Ring_H3K4_peak_207	23	.	1.93651	4.41423	2.31521	intergenic
Pf3D7_05_v3	1342117	1342747	Ring_H3K4_peak_208	13	.	1.82943	3.20805	1.31893	intergenic
Pf3D7_06_v3	1234	1630	Ring_H3K4_peak_209	13	.	1.82677	3.19737	1.31364	intergenic
Pf3D7_06_v3	3373	3885	Ring_H3K4_peak_210	44	.	2.38525	6.80026	4.45975	PF3D7_0600200	VAR	erythrocyte membrane protein 1, PfEMP1
Pf3D7_06_v3	5346	5750	Ring_H3K4_peak_211	21	.	1.95072	4.19208	2.1234	intergenic
Pf3D7_06_v3	10737	10942	Ring_H3K4_peak_212	27	.	2.1404	4.90111	2.7257	intergenic
Pf3D7_06_v3	15090	15788	Ring_H3K4_peak_213	22	.	2.07517	4.36188	2.25349	PF3D7_0600300	RIF	rifin
Pf3D7_06_v3	32158	32660	Ring_H3K4_peak_214	22	.	2.03851	4.35325	2.23998	PF3D7_0600700	RIF	rifin
Pf3D7_06_v3	38863	39265	Ring_H3K4_peak_215	15	.	1.93819	3.49139	1.5393	intergenic
Pf3D7_06_v3	76438	77241	Ring_H3K4_peak_216	92	.	2.76659	11.8192	9.27316	PF3D7_0601900		conserved Plasmodium protein, unknown function
Pf3D7_06_v3	178943	179652	Ring_H3K4_peak_217	29	.	2.17472	5.14111	2.92489	intergenic
Pf3D7_06_v3	263229	263807	Ring_H3K4_peak_218	128	.	3.21985	15.4257	12.8163	PF3D7_0606300		conserved Plasmodium protein, unknown function	PF3D7_0606400		conserved Plasmodium protein, unknown function
Pf3D7_06_v3	276035	276293	Ring_H3K4_peak_219	12	.	1.78452	3.12636	1.25978	intergenic
Pf3D7_06_v3	354350	354555	Ring_H3K4_peak_220	33	.	2.30458	5.60326	3.33325	PF3D7_0608600		conserved Plasmodium protein, unknown function
Pf3D7_06_v3	444740	445020	Ring_H3K4_peak_221	38	.	2.27572	6.11725	3.81267	PF3D7_0610400	H3	histone H3	PF3D7_0610500		peptidyl-tRNA hydrolase PTRHD1, putative
Pf3D7_06_v3	454975	455685	Ring_H3K4_peak_222	15	.	1.87569	3.47931	1.52462	PF3D7_0610900	SPT5	transcription elongation factor SPT5, putative
Pf3D7_06_v3	482813	483271	Ring_H3K4_peak_223	13	.	1.7675	3.27207	1.37064	PF3D7_0611500		conserved protein, unknown function
Pf3D7_06_v3	485207	485592	Ring_H3K4_peak_224	18	.	1.95804	3.91752	1.88278	PF3D7_0611600	BTP1	basal complex transmembrane protein 1
Pf3D7_06_v3	493039	493439	Ring_H3K4_peak_225	13	.	1.84935	3.21506	1.32683	intergenic
Pf3D7_06_v3	555953	557220	Ring_H3K4_peak_226	128	.	3.43296	15.39	12.8228	intergenic
Pf3D7_06_v3	585568	585896	Ring_H3K4_peak_227	12	.	1.80849	3.08766	1.23147	PF3D7_0614000		thiamine-phosphate synthase, putative
Pf3D7_06_v3	586995	587204	Ring_H3K4_peak_228	33	.	2.2498	5.62714	3.35685	PF3D7_0614000		thiamine-phosphate synthase, putative
Pf3D7_06_v3	593187	593963	Ring_H3K4_peak_229	21	.	1.98283	4.24302	2.16852	PF3D7_0614200	NAR1	cytosolic Fe-S cluster assembly factor NAR1, putative
Pf3D7_06_v3	623273	623531	Ring_H3K4_peak_230	15	.	1.84781	3.51059	1.55432	PF3D7_0615100	ENR	enoyl-acyl carrier reductase
Pf3D7_06_v3	726384	727597	Ring_H3K4_peak_231	13	.	1.76386	3.25356	1.35372	intergenic
Pf3D7_06_v3	730047	730676	Ring_H3K4_peak_232	15	.	1.83954	3.49832	1.54333	intergenic
Pf3D7_06_v3	731117	731396	Ring_H3K4_peak_233	16	.	1.83939	3.57421	1.60209	intergenic
Pf3D7_06_v3	734227	734499	Ring_H3K4_peak_234	14	.	1.90815	3.37294	1.4517	intergenic
Pf3D7_06_v3	741545	741820	Ring_H3K4_peak_235	15	.	1.82943	3.44602	1.50282	PF3D7_0617700	RIF	rifin
Pf3D7_06_v3	748502	748805	Ring_H3K4_peak_236	17	.	1.86231	3.7707	1.75338	intergenic
Pf3D7_06_v3	757911	758204	Ring_H3K4_peak_237	34	.	2.25823	5.71998	3.47091	PF3D7_0618000		conserved Plasmodium membrane protein, unknown function
Pf3D7_06_v3	815753	816919	Ring_H3K4_peak_238	22	.	1.99971	4.35646	2.2617	intergenic
Pf3D7_06_v3	860783	861843	Ring_H3K4_peak_239	115	.	2.95599	14.1952	11.5915	intergenic
Pf3D7_06_v3	872655	872949	Ring_H3K4_peak_240	56	.	2.59792	8.08461	5.65852	PF3D7_0621300	PUF3	mRNA-binding protein PUF3
Pf3D7_06_v3	878960	879517	Ring_H3K4_peak_241	15	.	1.86877	3.51906	1.55943	PF3D7_0621400	ALV7	Pf77 protein
Pf3D7_06_v3	917198	917467	Ring_H3K4_peak_242	31	.	2.23881	5.40355	3.17512	intergenic
Pf3D7_06_v3	933270	933999	Ring_H3K4_peak_243	174	.	3.84366	20.1996	17.4823	intergenic
Pf3D7_06_v3	941191	941762	Ring_H3K4_peak_244	18	.	2.02349	3.90487	1.87149	intergenic
Pf3D7_06_v3	981755	982093	Ring_H3K4_peak_245	11	.	1.72731	3.01455	1.17636	intergenic
Pf3D7_06_v3	1003073	1003313	Ring_H3K4_peak_246	16	.	1.898	3.69393	1.69859	intergenic
Pf3D7_06_v3	1037282	1037632	Ring_H3K4_peak_247	46	.	2.30946	6.94638	4.60017	PF3D7_0625600	PAP	poly(A) polymerase PAP, putative
Pf3D7_06_v3	1061849	1062193	Ring_H3K4_peak_248	15	.	1.78764	3.44762	1.50647	PF3D7_0626300	FabB/FabF	3-oxoacyl-acyl-carrier protein synthase I/II
Pf3D7_06_v3	1084779	1085226	Ring_H3K4_peak_249	11	.	1.77087	3.03143	1.19147	PF3D7_0627000		conserved Plasmodium protein, unknown function
Pf3D7_06_v3	1101837	1102112	Ring_H3K4_peak_250	29	.	2.20497	5.15566	2.94682	PF3D7_0627500	DJ1	protein DJ-1
Pf3D7_06_v3	1168554	1168962	Ring_H3K4_peak_251	16	.	1.90541	3.61715	1.63976	PF3D7_0628300	CEPT	choline/ethanolaminephosphotransferase, putative
Pf3D7_06_v3	1330285	1330611	Ring_H3K4_peak_252	23	.	2.05131	4.47501	2.34497	PF3D7_0631800	RIF	rifin
Pf3D7_06_v3	1336621	1337036	Ring_H3K4_peak_253	14	.	1.85858	3.3882	1.45623	PF3D7_0632000	RIF	rifin
Pf3D7_06_v3	1351524	1351866	Ring_H3K4_peak_254	12	.	1.76626	3.09303	1.23575	PF3D7_0632400	RIF	rifin
Pf3D7_06_v3	1361746	1362348	Ring_H3K4_peak_255	22	.	1.98133	4.3186	2.22862	intergenic
Pf3D7_06_v3	1362922	1363390	Ring_H3K4_peak_256	11	.	1.74001	2.97302	1.1478	intergenic
Pf3D7_06_v3	1372241	1372646	Ring_H3K4_peak_257	11	.	1.80121	2.91651	1.11112	PF3D7_0632700	RIF	rifin
Pf3D7_06_v3	1377371	1377690	Ring_H3K4_peak_258	16	.	1.9132	3.58966	1.61085	intergenic
Pf3D7_06_v3	1378748	1381086	Ring_H3K4_peak_259	22	.	1.9712	4.30536	2.23115	intergenic
Pf3D7_06_v3	1381753	1382726	Ring_H3K4_peak_260	30	.	2.19021	5.26737	3.08971	intergenic
Pf3D7_06_v3	1384739	1385034	Ring_H3K4_peak_261	57	.	2.72354	8.21817	5.78844	intergenic
Pf3D7_07_v3	17577	18077	Ring_H3K4_peak_262	261	.	4.88299	29.0566	26.1238	intergenic
Pf3D7_07_v3	18972	19453	Ring_H3K4_peak_263	734	.	8.52163	77.1971	73.4078	intergenic
Pf3D7_07_v3	20168	20678	Ring_H3K4_peak_264	78	.	3.02145	10.4279	7.89022	PF3D7_0700100	VAR	erythrocyte membrane protein 1, PfEMP1
Pf3D7_07_v3	21130	23100	Ring_H3K4_peak_265	29	.	2.1195	5.19701	2.99779	intergenic
Pf3D7_07_v3	23518	24251	Ring_H3K4_peak_266	13	.	1.78379	3.29926	1.38639	intergenic
Pf3D7_07_v3	25454	25768	Ring_H3K4_peak_267	27	.	2.00039	4.93381	2.74041	intergenic
Pf3D7_07_v3	37033	37245	Ring_H3K4_peak_268	24	.	2.12528	4.56267	2.40683	PF3D7_0700400		stevor
Pf3D7_07_v3	59384	59777	Ring_H3K4_peak_269	13	.	1.83078	3.19097	1.30531	intergenic
Pf3D7_07_v3	87815	88081	Ring_H3K4_peak_270	26	.	2.06184	4.75085	2.60004	intergenic
Pf3D7_07_v3	89931	90562	Ring_H3K4_peak_271	13	.	1.83342	3.24188	1.34582	intergenic
Pf3D7_07_v3	93945	94321	Ring_H3K4_peak_272	18	.	1.84307	3.91223	1.87175	intergenic
Pf3D7_07_v3	99837	100840	Ring_H3K4_peak_273	34	.	2.09826	5.63208	3.42123	PF3D7_0702400	SEMP1	small exported membrane protein 1
Pf3D7_07_v3	111394	112263	Ring_H3K4_peak_274	219	.	3.37209	24.8437	21.9798	PF3D7_0702900		centrin, putative
Pf3D7_07_v3	296006	296542	Ring_H3K4_peak_275	13	.	1.83462	3.30955	1.39445	PF3D7_0706100		conserved Plasmodium protein, unknown function
Pf3D7_07_v3	325941	327000	Ring_H3K4_peak_276	383	.	4.95774	41.4166	38.3118	intergenic
Pf3D7_07_v3	327733	328049	Ring_H3K4_peak_277	153	.	3.1353	18.0752	15.3537	intergenic
Pf3D7_07_v3	328896	329220	Ring_H3K4_peak_278	181	.	3.7616	20.9429	18.1712	PF3D7_0707200		conserved Plasmodium protein, unknown function
Pf3D7_07_v3	380654	381585	Ring_H3K4_peak_279	517	.	5.10116	55.1364	51.7071	PF3D7_0708400	HSP90	heat shock protein 90
Pf3D7_07_v3	384245	385521	Ring_H3K4_peak_280	507	.	5.33106	54.1847	50.7997	PF3D7_0708500		heat shock protein 86 family protein
Pf3D7_07_v3	389549	389800	Ring_H3K4_peak_281	14	.	1.8551	3.37224	1.44532	PF3D7_0708600	IMC1d	inner membrane complex protein 1d, putative
Pf3D7_07_v3	391647	392117	Ring_H3K4_peak_282	17	.	1.86305	3.74987	1.74677	intergenic
Pf3D7_07_v3	401093	401331	Ring_H3K4_peak_283	50	.	2.5699	7.46414	5.06873	intergenic
Pf3D7_07_v3	411302	411814	Ring_H3K4_peak_284	14	.	1.8726	3.32321	1.40799	PF3D7_0709200	GLP3	glutaredoxin-like protein
Pf3D7_07_v3	514095	514653	Ring_H3K4_peak_285	103	.	2.97805	12.9442	10.3365	intergenic
Pf3D7_07_v3	516482	517657	Ring_H3K4_peak_286	29	.	2.06494	5.14636	2.97557	intergenic
Pf3D7_07_v3	518066	518378	Ring_H3K4_peak_287	47	.	2.38801	7.13711	4.77299	intergenic
Pf3D7_07_v3	529655	530002	Ring_H3K4_peak_288	26	.	2.08727	4.77681	2.63846	intergenic
Pf3D7_07_v3	530881	531922	Ring_H3K4_peak_289	33	.	2.15289	5.50679	3.30177	intergenic
Pf3D7_07_v3	532331	532905	Ring_H3K4_peak_290	28	.	2.05192	5.00446	2.85048	intergenic
Pf3D7_07_v3	534032	535025	Ring_H3K4_peak_291	13	.	1.81081	3.20548	1.31796	intergenic
Pf3D7_07_v3	546735	548888	Ring_H3K4_peak_292	33	.	2.23211	5.52802	3.37185	intergenic
Pf3D7_07_v3	551486	551705	Ring_H3K4_peak_293	70	.	2.9087	9.53661	7.04226	PF3D7_0712400	VAR	erythrocyte membrane protein 1, PfEMP1
Pf3D7_07_v3	554872	556186	Ring_H3K4_peak_294	14	.	1.80079	3.32465	1.40823	intergenic
Pf3D7_07_v3	558965	559175	Ring_H3K4_peak_295	35	.	2.35861	5.83476	3.55414	intergenic
Pf3D7_07_v3	569071	569708	Ring_H3K4_peak_296	20	.	2.06967	4.17094	2.08764	intergenic
Pf3D7_07_v3	570157	570780	Ring_H3K4_peak_297	13	.	1.76142	3.25598	1.3533	intergenic
Pf3D7_07_v3	572301	574346	Ring_H3K4_peak_298	19	.	1.94566	4.06031	1.99818	intergenic
Pf3D7_07_v3	586163	587106	Ring_H3K4_peak_299	35	.	2.19378	5.74545	3.50988	intergenic
Pf3D7_07_v3	587937	589038	Ring_H3K4_peak_300	37	.	2.30901	5.9901	3.73346	intergenic
Pf3D7_07_v3	592401	592802	Ring_H3K4_peak_301	36	.	2.22512	5.88468	3.61699	intergenic
Pf3D7_07_v3	594831	596995	Ring_H3K4_peak_302	32	.	2.16113	5.41778	3.21899	intergenic
Pf3D7_07_v3	670700	670932	Ring_H3K4_peak_303	56	.	2.33119	8.08949	5.66127	intergenic
Pf3D7_07_v3	671532	671861	Ring_H3K4_peak_304	153	.	3.13904	18.073	15.3856	intergenic
Pf3D7_07_v3	672568	672945	Ring_H3K4_peak_305	461	.	5.95376	49.3892	46.1038	PF3D7_0715000	PNPase	4-nitrophenylphosphatase
Pf3D7_07_v3	834129	834363	Ring_H3K4_peak_306	29	.	2.21528	5.1139	2.90789	PF3D7_0718800		conserved protein, unknown function
Pf3D7_07_v3	858797	859022	Ring_H3K4_peak_307	16	.	1.86096	3.63037	1.64447	PF3D7_0719600		60S ribosomal protein L11a, putative
Pf3D7_07_v3	887450	887655	Ring_H3K4_peak_308	23	.	2.13491	4.50337	2.39035	PF3D7_0720600		conserved protein, unknown function
Pf3D7_07_v3	897067	897518	Ring_H3K4_peak_309	55	.	2.3852	7.94771	5.58357	intergenic
Pf3D7_07_v3	968252	968852	Ring_H3K4_peak_310	17	.	1.95248	3.78902	1.77827	PF3D7_0723000		tRNAHis guanylyltransferase, putative
Pf3D7_07_v3	1076373	1077311	Ring_H3K4_peak_311	35	.	2.12275	5.75841	3.5406	intergenic
Pf3D7_07_v3	1082159	1083407	Ring_H3K4_peak_312	194	.	3.76577	22.2362	19.4318	intergenic
Pf3D7_07_v3	1085760	1086360	Ring_H3K4_peak_313	122	.	3.35982	14.7221	12.249	intergenic
Pf3D7_07_v3	1090617	1092148	Ring_H3K4_peak_314	124	.	2.84298	14.8353	12.4198	intergenic
Pf3D7_07_v3	1093565	1094077	Ring_H3K4_peak_315	32	.	2.1414	5.39731	3.20778	PF3D7_0726100		Plasmodium exported protein, unknown function
Pf3D7_07_v3	1102224	1102700	Ring_H3K4_peak_316	20	.	1.98698	4.11943	2.08127	intergenic
Pf3D7_07_v3	1107428	1108268	Ring_H3K4_peak_317	235	.	3.89	26.2804	23.5118	PF3D7_0726400		conserved Plasmodium membrane protein, unknown function
Pf3D7_07_v3	1108717	1108953	Ring_H3K4_peak_318	63	.	2.74985	8.7962	6.34464	PF3D7_0726400		conserved Plasmodium membrane protein, unknown function
Pf3D7_07_v3	1163201	1163587	Ring_H3K4_peak_319	13	.	1.79465	3.18634	1.30663	PF3D7_0727500		mTERF domain-containing protein, putative
Pf3D7_07_v3	1172092	1172575	Ring_H3K4_peak_320	13	.	1.8415	3.22466	1.32989	intergenic
Pf3D7_07_v3	1174083	1174313	Ring_H3K4_peak_321	17	.	1.97842	3.74951	1.74389	intergenic
Pf3D7_07_v3	1293701	1294003	Ring_H3K4_peak_322	61	.	2.26558	8.63755	6.18641	intergenic
Pf3D7_07_v3	1317935	1319246	Ring_H3K4_peak_323	319	.	4.31442	34.9234	31.9951	intergenic
Pf3D7_07_v3	1321651	1321920	Ring_H3K4_peak_324	15	.	1.80457	3.4653	1.51421	intergenic
Pf3D7_07_v3	1348079	1348732	Ring_H3K4_peak_325	112	.	2.83892	13.8117	11.2321	PF3D7_0731300	PfG174	Plasmodium exported protein (PHISTb), unknown function
Pf3D7_07_v3	1383025	1383379	Ring_H3K4_peak_326	16	.	1.95138	3.69808	1.69998	intergenic
Pf3D7_07_v3	1391240	1391739	Ring_H3K4_peak_327	18	.	1.99726	3.89334	1.87223	PF3D7_0732200	RIF	rifin
Pf3D7_07_v3	1396560	1397019	Ring_H3K4_peak_328	21	.	1.93883	4.18299	2.10729	PF3D7_0732300	RIF	rifin
Pf3D7_07_v3	1399538	1400172	Ring_H3K4_peak_329	13	.	1.77879	3.23581	1.33781	PF3D7_0732400	RIF	rifin
Pf3D7_07_v3	1419900	1420258	Ring_H3K4_peak_330	36	.	2.27105	5.95022	3.65373	intergenic
Pf3D7_07_v3	1421089	1421441	Ring_H3K4_peak_331	14	.	1.86318	3.41918	1.47984	intergenic
Pf3D7_07_v3	1422367	1425812	Ring_H3K4_peak_332	33	.	2.12183	5.44191	3.3169	intergenic
Pf3D7_07_v3	1428193	1428896	Ring_H3K4_peak_333	195	.	4.10219	22.3169	19.5428	intergenic
Pf3D7_08_v3	18628	19594	Ring_H3K4_peak_334	124	.	3.54605	15.0487	12.4161	intergenic
Pf3D7_08_v3	21259	22469	Ring_H3K4_peak_335	25	.	2.06728	4.68345	2.53567	PF3D7_0800100	VAR	erythrocyte membrane protein 1, PfEMP1
Pf3D7_08_v3	23518	24716	Ring_H3K4_peak_336	21	.	1.94932	4.24919	2.16023	intergenic
Pf3D7_08_v3	40868	41101	Ring_H3K4_peak_337	21	.	2.02455	4.22837	2.1487	PF3D7_0800300	VAR	erythrocyte membrane protein 1, PfEMP1
Pf3D7_08_v3	42294	42570	Ring_H3K4_peak_338	28	.	2.19588	5.05874	2.85776	intergenic
Pf3D7_08_v3	43123	44800	Ring_H3K4_peak_339	31	.	2.11733	5.30315	3.10787	intergenic
Pf3D7_08_v3	45974	46349	Ring_H3K4_peak_340	22	.	2.03166	4.39372	2.28723	intergenic
Pf3D7_08_v3	48271	48539	Ring_H3K4_peak_341	16	.	1.87408	3.62383	1.64474	intergenic
Pf3D7_08_v3	56920	57327	Ring_H3K4_peak_342	19	.	1.95708	4.01789	1.98008	PF3D7_0800500	RIF	rifin
Pf3D7_08_v3	96222	96603	Ring_H3K4_peak_343	17	.	1.92729	3.77055	1.7502	intergenic
Pf3D7_08_v3	97074	97450	Ring_H3K4_peak_344	13	.	1.85392	3.27161	1.36498	intergenic
Pf3D7_08_v3	98095	99062	Ring_H3K4_peak_345	13	.	1.79486	3.2186	1.33003	intergenic
Pf3D7_08_v3	142514	142919	Ring_H3K4_peak_346	71	.	2.8	9.71393	7.18584	intergenic
Pf3D7_08_v3	165526	166036	Ring_H3K4_peak_347	12	.	1.86977	3.17153	1.29194	PF3D7_0802300	PWP2	periodic tryptophan protein 2, putative
Pf3D7_08_v3	307085	307313	Ring_H3K4_peak_348	14	.	1.8349	3.33284	1.4147	intergenic
Pf3D7_08_v3	311164	311369	Ring_H3K4_peak_349	41	.	2.08086	6.50284	4.17638	PF3D7_0805600	PAP2	phosphatidic acid phosphatase 2
Pf3D7_08_v3	397208	397460	Ring_H3K4_peak_350	31	.	2.24819	5.44467	3.19702	intergenic
Pf3D7_08_v3	431170	432191	Ring_H3K4_peak_351	15	.	1.84839	3.55151	1.59093	intergenic
Pf3D7_08_v3	433547	435037	Ring_H3K4_peak_352	18	.	1.90275	3.91516	1.87871	intergenic
Pf3D7_08_v3	436201	436641	Ring_H3K4_peak_353	51	.	2.57852	7.47325	5.12402	intergenic
Pf3D7_08_v3	440308	440593	Ring_H3K4_peak_354	15	.	1.78779	3.48573	1.53662	PF3D7_0808700	VAR	erythrocyte membrane protein 1, PfEMP1
Pf3D7_08_v3	441931	442271	Ring_H3K4_peak_355	10	.	1.71976	2.85288	1.06306	intergenic
Pf3D7_08_v3	442890	443935	Ring_H3K4_peak_356	19	.	1.89758	3.94725	1.91137	intergenic
Pf3D7_08_v3	445226	445859	Ring_H3K4_peak_357	17	.	1.87081	3.68592	1.70463	intergenic
Pf3D7_08_v3	450949	451368	Ring_H3K4_peak_358	16	.	1.83494	3.66734	1.67303	PF3D7_0808800	RIF	rifin
Pf3D7_08_v3	459199	459695	Ring_H3K4_peak_359	25	.	2.0851	4.68651	2.55898	PF3D7_0809100	VAR	erythrocyte membrane protein 1, PfEMP1
Pf3D7_08_v3	461608	462021	Ring_H3K4_peak_360	17	.	1.80683	3.68918	1.70409	intergenic
Pf3D7_08_v3	463908	464254	Ring_H3K4_peak_361	19	.	1.96414	4.0091	1.96145	intergenic
Pf3D7_08_v3	555242	555586	Ring_H3K4_peak_362	48	.	2.42432	7.28169	4.89941	intergenic
Pf3D7_08_v3	685055	685316	Ring_H3K4_peak_363	50	.	2.4283	7.47191	5.08863	PF3D7_0814200	ALBA1	DNA/RNA-binding protein Alba 1
Pf3D7_08_v3	687480	688047	Ring_H3K4_peak_364	16	.	1.78881	3.64194	1.65502	intergenic
Pf3D7_08_v3	830848	831167	Ring_H3K4_peak_365	22	.	1.95926	4.35176	2.24884	intergenic
Pf3D7_08_v3	859124	859507	Ring_H3K4_peak_366	31	.	1.88398	5.3164	3.13443	PF3D7_0818900	HSP70	heat shock protein 70
Pf3D7_08_v3	860622	860862	Ring_H3K4_peak_367	14	.	1.78192	3.42929	1.49178	intergenic
Pf3D7_08_v3	861459	862395	Ring_H3K4_peak_368	26	.	1.96776	4.83949	2.69478	intergenic
Pf3D7_08_v3	1012250	1012520	Ring_H3K4_peak_369	46	.	2.54692	7.01695	4.65045	PF3D7_0823000	VPS15	serine/threonine protein kinase VPS15, putative
Pf3D7_08_v3	1022624	1023728	Ring_H3K4_peak_370	19	.	1.94394	3.99431	1.951	intergenic
Pf3D7_08_v3	1113396	1113701	Ring_H3K4_peak_371	12	.	1.75808	3.05924	1.21011	PF3D7_0826100	HEUL	HECT-like E3 ubiquitin ligase, putative
Pf3D7_08_v3	1173141	1173448	Ring_H3K4_peak_372	18	.	1.85452	3.82909	1.80508	intergenic
Pf3D7_08_v3	1184446	1184787	Ring_H3K4_peak_373	17	.	1.93192	3.78149	1.77044	PF3D7_0827400		conserved protein, unknown function
Pf3D7_08_v3	1196370	1196663	Ring_H3K4_peak_374	20	.	2.0459	4.12959	2.04978	intergenic
Pf3D7_08_v3	1229694	1230011	Ring_H3K4_peak_375	14	.	1.87568	3.38961	1.45523	PF3D7_0828600	FT1	folate transporter 1
Pf3D7_08_v3	1240692	1240989	Ring_H3K4_peak_376	21	.	2.03038	4.23029	2.1365	PF3D7_0828900		conserved protein, unknown function
Pf3D7_08_v3	1293292	1293596	Ring_H3K4_peak_377	43	.	2.26365	6.66998	4.34581	PF3D7_0830400		CRA domain-containing protein, putative
Pf3D7_08_v3	1299486	1299738	Ring_H3K4_peak_378	32	.	2.21143	5.45127	3.21968	intergenic
Pf3D7_08_v3	1309176	1309451	Ring_H3K4_peak_379	48	.	2.46621	7.19932	4.82906	PF3D7_0830800	SURF8.2	surface-associated interspersed protein 8.2 (SURFIN 8.2)
Pf3D7_08_v3	1358679	1359098	Ring_H3K4_peak_380	12	.	1.79803	3.06693	1.21502	PF3D7_0831600	CLAG8	cytoadherence linked asexual protein 8
Pf3D7_08_v3	1368068	1368679	Ring_H3K4_peak_381	40	.	2.2711	6.31801	4.01478	intergenic
Pf3D7_08_v3	1373632	1374288	Ring_H3K4_peak_382	351	.	3.23769	38.2701	35.127	PF3D7_0831800	HRP2	histidine-rich protein II
Pf3D7_08_v3	1383546	1384164	Ring_H3K4_peak_383	13	.	1.87398	3.23587	1.33999	PF3D7_0832000		stevor
Pf3D7_08_v3	1387435	1387650	Ring_H3K4_peak_384	14	.	1.82922	3.37375	1.44442	intergenic
Pf3D7_08_v3	1411644	1411994	Ring_H3K4_peak_385	22	.	2.01452	4.39124	2.27098	PF3D7_0832800	RIF	rifin
Pf3D7_08_v3	1427590	1427818	Ring_H3K4_peak_386	17	.	1.98519	3.74195	1.73519	PF3D7_0833200	RIF	rifin
Pf3D7_08_v3	1438021	1438577	Ring_H3K4_peak_387	19	.	1.95593	4.03494	1.98678	intergenic
Pf3D7_08_v3	1440439	1441234	Ring_H3K4_peak_388	21	.	1.9881	4.24142	2.1534	intergenic
Pf3D7_08_v3	1441646	1443561	Ring_H3K4_peak_389	36	.	2.20893	5.88075	3.66344	intergenic
Pf3D7_08_v3	1444322	1444621	Ring_H3K4_peak_390	170	.	4.07313	19.8455	17.0888	intergenic
Pf3D7_08_v3	1445801	1446338	Ring_H3K4_peak_391	98	.	3.06555	12.4112	9.83638	intergenic
Pf3D7_09_v3	8144	8459	Ring_H3K4_peak_392	35	.	2.22024	5.749	3.50787	intergenic
Pf3D7_09_v3	17241	17909	Ring_H3K4_peak_393	135	.	3.59719	16.2416	13.5699	intergenic
Pf3D7_09_v3	18933	19189	Ring_H3K4_peak_394	147	.	3.84975	17.4944	14.7704	intergenic
Pf3D7_09_v3	19986	20960	Ring_H3K4_peak_395	24	.	2.04317	4.53682	2.41219	PF3D7_0900100	VAR	erythrocyte membrane protein 1, PfEMP1
Pf3D7_09_v3	22397	22655	Ring_H3K4_peak_396	13	.	1.71498	3.18987	1.30793	intergenic
Pf3D7_09_v3	23587	23995	Ring_H3K4_peak_397	21	.	2.00118	4.20192	2.1125	intergenic
Pf3D7_09_v3	24920	25501	Ring_H3K4_peak_398	14	.	1.87028	3.42686	1.49031	intergenic
Pf3D7_09_v3	33669	34187	Ring_H3K4_peak_399	20	.	2.05326	4.07593	2.01524	PF3D7_0900300	RIF	rifin
Pf3D7_09_v3	43069	43436	Ring_H3K4_peak_400	15	.	1.89382	3.54728	1.58229	PF3D7_0900500	RIF	rifin
Pf3D7_09_v3	49731	50133	Ring_H3K4_peak_401	14	.	1.90992	3.40297	1.46941	PF3D7_0900700	RIF	rifin
Pf3D7_09_v3	71093	71631	Ring_H3K4_peak_402	16	.	1.88865	3.63204	1.64649	PF3D7_0901400	RIF	rifin
Pf3D7_09_v3	75018	75583	Ring_H3K4_peak_403	21	.	1.93683	4.18016	2.10811	PF3D7_0901500	RIF	rifin
Pf3D7_09_v3	105509	105748	Ring_H3K4_peak_404	24	.	2.06146	4.52017	2.41419	PF3D7_0902400	FIKK9.5	serine/threonine protein kinase, FIKK family
Pf3D7_09_v3	129607	130369	Ring_H3K4_peak_405	30	.	2.12986	5.23012	3.02941	PF3D7_0903100	RER1	protein RER1, putative
Pf3D7_09_v3	178799	179308	Ring_H3K4_peak_406	19	.	1.99613	4.05158	1.98231	PF3D7_0903800	CCp4	LCCL domain-containing protein
Pf3D7_09_v3	214553	215122	Ring_H3K4_peak_407	428	.	6.11249	46.1037	42.8804	intergenic
Pf3D7_09_v3	275816	276283	Ring_H3K4_peak_408	112	.	3.29041	13.7856	11.2073	PF3D7_0905500		conserved protein, unknown function
Pf3D7_09_v3	328323	329679	Ring_H3K4_peak_409	74	.	2.48064	9.89958	7.45293	PF3D7_0906700	LRR9	leucine-rich repeat protein
Pf3D7_09_v3	356213	356448	Ring_H3K4_peak_410	15	.	1.96323	3.53262	1.56351	PF3D7_0907500		conserved protein, unknown function
Pf3D7_09_v3	372961	373189	Ring_H3K4_peak_411	35	.	2.2702	5.79089	3.53494	PF3D7_0908100		apicoplast integral membrane protein, putative
Pf3D7_09_v3	530646	531021	Ring_H3K4_peak_412	24	.	2.06298	4.60405	2.46579	intergenic
Pf3D7_09_v3	580848	581463	Ring_H3K4_peak_413	14	.	1.87391	3.33099	1.41786	PF3D7_0913400		elongation factor, putative	PF3D7_0913500	AMR4	protein AMR4
Pf3D7_09_v3	608994	609357	Ring_H3K4_peak_414	15	.	1.85714	3.44974	1.50175	intergenic
Pf3D7_09_v3	630748	631037	Ring_H3K4_peak_415	12	.	1.81536	3.13151	1.26219	intergenic
Pf3D7_09_v3	631604	631876	Ring_H3K4_peak_416	35	.	2.18987	5.83127	3.55487	PF3D7_0914800		GINS complex subunit Psf3, putative
Pf3D7_09_v3	700631	701589	Ring_H3K4_peak_417	74	.	2.42375	9.83876	7.47841	intergenic
Pf3D7_09_v3	736546	737010	Ring_H3K4_peak_418	14	.	1.86628	3.42963	1.48509	PF3D7_0917900	BIP	heat shock protein 70
Pf3D7_09_v3	738196	738620	Ring_H3K4_peak_419	25	.	2.10313	4.63926	2.50528	intergenic
Pf3D7_09_v3	814630	815368	Ring_H3K4_peak_420	182	.	3.99741	20.9574	18.2554	intergenic
Pf3D7_09_v3	853442	853976	Ring_H3K4_peak_421	24	.	2.0292	4.56193	2.42731	intergenic
Pf3D7_09_v3	889140	889374	Ring_H3K4_peak_422	39	.	2.32208	6.24722	3.9535	PF3D7_0922000		dynein intermediate chain, putative
Pf3D7_09_v3	962148	962442	Ring_H3K4_peak_423	17	.	1.86742	3.70372	1.70588	PF3D7_0923800	TRXR	thioredoxin reductase
Pf3D7_09_v3	963261	963618	Ring_H3K4_peak_424	29	.	2.05899	5.17756	2.98614	intergenic
Pf3D7_09_v3	1021987	1022296	Ring_H3K4_peak_425	13	.	1.80433	3.25517	1.35471	PF3D7_0925400		protein phosphatase-beta
Pf3D7_09_v3	1028505	1028977	Ring_H3K4_peak_426	59	.	2.56625	8.33343	5.92926	PF3D7_0925700	HDAC1	histone deacetylase 1
Pf3D7_09_v3	1039425	1039695	Ring_H3K4_peak_427	65	.	2.4745	9.03772	6.57973	PF3D7_0925900	LCN	lipocalin
Pf3D7_09_v3	1076952	1077284	Ring_H3K4_peak_428	15	.	1.87489	3.42083	1.5058	intergenic
Pf3D7_09_v3	1115556	1115775	Ring_H3K4_peak_429	21	.	1.9749	4.20256	2.10118	PF3D7_0927400		conserved Plasmodium protein, unknown function
Pf3D7_09_v3	1129512	1129908	Ring_H3K4_peak_430	14	.	1.84383	3.3169	1.40022	PF3D7_0927900	PSD	phosphatidylserine decarboxylase
Pf3D7_09_v3	1156296	1156529	Ring_H3K4_peak_431	28	.	2.21807	5.01571	2.83321	PF3D7_0928800		serine/threonine protein kinase, putative
Pf3D7_09_v3	1203626	1204154	Ring_H3K4_peak_432	26	.	1.96826	4.74085	2.61231	intergenic
Pf3D7_09_v3	1205689	1205994	Ring_H3K4_peak_433	11	.	1.76075	2.99884	1.16609	intergenic
Pf3D7_09_v3	1283181	1283876	Ring_H3K4_peak_434	23	.	2.10585	4.44246	2.31818	intergenic
Pf3D7_09_v3	1289323	1289528	Ring_H3K4_peak_435	15	.	1.93123	3.48442	1.53462	PF3D7_0932300	M18AAP	M18 aspartyl aminopeptidase
Pf3D7_09_v3	1384731	1385882	Ring_H3K4_peak_436	42	.	2.47262	6.61683	4.28908	intergenic
Pf3D7_09_v3	1391305	1391847	Ring_H3K4_peak_437	136	.	3.52889	16.2709	13.6227	intergenic
Pf3D7_09_v3	1424712	1425391	Ring_H3K4_peak_438	46	.	2.28627	7.0209	4.69803	intergenic
Pf3D7_09_v3	1428736	1429325	Ring_H3K4_peak_439	172	.	3.48992	20.0186	17.2684	PF3D7_0936100	ETRAMP9	early transcribed membrane protein
Pf3D7_09_v3	1457552	1457817	Ring_H3K4_peak_440	38	.	2.3608	6.12456	3.82451	PF3D7_0936800		Plasmodium exported protein (PHISTc), unknown function
Pf3D7_09_v3	1497990	1498247	Ring_H3K4_peak_441	13	.	1.80362	3.24645	1.34789	intergenic
Pf3D7_09_v3	1500460	1503453	Ring_H3K4_peak_442	59	.	2.53991	8.3963	5.9909	intergenic
Pf3D7_09_v3	1505533	1506259	Ring_H3K4_peak_443	121	.	3.55531	14.7859	12.1095	intergenic
Pf3D7_10_v3	25260	25799	Ring_H3K4_peak_444	275	.	4.54137	30.5636	27.5892	intergenic
Pf3D7_10_v3	27319	27551	Ring_H3K4_peak_445	131	.	3.68825	15.891	13.1907	intergenic
Pf3D7_10_v3	28359	31649	Ring_H3K4_peak_446	51	.	2.4081	7.42812	5.12438	intergenic
Pf3D7_10_v3	33555	33908	Ring_H3K4_peak_447	71	.	2.74068	9.65345	7.16214	intergenic
Pf3D7_10_v3	38330	38738	Ring_H3K4_peak_448	11	.	1.75874	2.93302	1.11893	PF3D7_1000200	RIF	rifin
Pf3D7_10_v3	45002	45499	Ring_H3K4_peak_449	27	.	2.1481	4.9669	2.7956	PF3D7_1000400	RIF	rifin
Pf3D7_10_v3	48272	49099	Ring_H3K4_peak_450	15	.	1.90867	3.49387	1.53618	PF3D7_1000500	RIF	rifin
Pf3D7_10_v3	69632	70006	Ring_H3K4_peak_451	141	.	3.1266	16.7957	14.1166	PF3D7_1001200	ACBP2	acyl-CoA binding protein, isoform 2, ACBP2
Pf3D7_10_v3	77833	78389	Ring_H3K4_peak_452	21	.	1.95226	4.24862	2.16752	intergenic
Pf3D7_10_v3	81363	81672	Ring_H3K4_peak_453	26	.	2.05832	4.83598	2.66903	intergenic
Pf3D7_10_v3	82079	82867	Ring_H3K4_peak_454	337	.	4.10275	36.7288	33.729	intergenic
Pf3D7_10_v3	89950	90457	Ring_H3K4_peak_455	107	.	3.11653	13.416	10.7905	intergenic
Pf3D7_10_v3	96555	97000	Ring_H3K4_peak_456	16	.	1.90015	3.63413	1.65311	PF3D7_1001800		Plasmodium exported protein (PHISTc), unknown function
Pf3D7_10_v3	101449	101665	Ring_H3K4_peak_457	17	.	1.85346	3.7131	1.71235	intergenic
Pf3D7_10_v3	172959	173418	Ring_H3K4_peak_458	15	.	1.89823	3.49276	1.53705	intergenic
Pf3D7_10_v3	201780	202473	Ring_H3K4_peak_459	12	.	1.85443	3.11172	1.24617	intergenic
Pf3D7_10_v3	256645	256913	Ring_H3K4_peak_460	11	.	1.79153	2.92279	1.1151	PF3D7_1006000	IMP4	IMP1-like protein, putative
Pf3D7_10_v3	343421	344103	Ring_H3K4_peak_461	16	.	1.8991	3.57939	1.6127	PF3D7_1008200		flap endonuclease, putative
Pf3D7_10_v3	365919	366271	Ring_H3K4_peak_462	13	.	1.75976	3.22207	1.32821	PF3D7_1008800	NOP5	nucleolar protein 5, putative
Pf3D7_10_v3	458369	458734	Ring_H3K4_peak_463	56	.	2.51736	8.07849	5.65225	intergenic
Pf3D7_10_v3	475383	475821	Ring_H3K4_peak_464	19	.	1.91411	4.00304	1.97038	PF3D7_1012400	HGPRT	hypoxanthine-guanine phosphoribosyltransferase
Pf3D7_10_v3	477213	477637	Ring_H3K4_peak_465	37	.	2.34573	5.99967	3.71291	PF3D7_1012500		phosphoglucomutase, putative
Pf3D7_10_v3	494575	494850	Ring_H3K4_peak_466	10	.	1.783	2.83304	1.05193	PF3D7_1012900	ATG18	autophagy-related protein 18
Pf3D7_10_v3	619489	619898	Ring_H3K4_peak_467	13	.	1.85019	3.31089	1.39688	intergenic
Pf3D7_10_v3	628281	628518	Ring_H3K4_peak_468	14	.	1.83049	3.33179	1.41222	intergenic
Pf3D7_10_v3	638604	638859	Ring_H3K4_peak_469	14	.	1.82534	3.38812	1.45765	intergenic
Pf3D7_10_v3	647404	647696	Ring_H3K4_peak_470	15	.	1.89668	3.47759	1.51813	PF3D7_1016300	GBP130	GBP130 protein
Pf3D7_10_v3	740240	740657	Ring_H3K4_peak_471	15	.	1.85722	3.48888	1.53331	intergenic
Pf3D7_10_v3	763476	763887	Ring_H3K4_peak_472	17	.	1.94283	3.79401	1.78233	intergenic
Pf3D7_10_v3	789986	790248	Ring_H3K4_peak_473	14	.	1.85584	3.37944	1.45052	intergenic
Pf3D7_10_v3	907775	908061	Ring_H3K4_peak_474	15	.	1.8864	3.54466	1.58514	intergenic
Pf3D7_10_v3	928280	928505	Ring_H3K4_peak_475	13	.	1.85687	3.21223	1.32134	intergenic
Pf3D7_10_v3	994074	994859	Ring_H3K4_peak_476	15	.	1.86106	3.48298	1.5305	PF3D7_1023800		conserved Plasmodium protein, unknown function
Pf3D7_10_v3	1001856	1002378	Ring_H3K4_peak_477	14	.	1.82467	3.33638	1.42155	intergenic
Pf3D7_10_v3	1011874	1012182	Ring_H3K4_peak_478	60	.	2.21395	8.53712	6.09469	intergenic
Pf3D7_10_v3	1021379	1021690	Ring_H3K4_peak_479	18	.	1.94652	3.88784	1.84683	PF3D7_1024200		RNA-binding protein, putative	PF3D7_1024300	ATPTG10	ATP synthase-associated protein, putative
Pf3D7_10_v3	1037666	1037910	Ring_H3K4_peak_480	11	.	1.80594	2.90432	1.10055	intergenic
Pf3D7_10_v3	1082573	1082926	Ring_H3K4_peak_481	16	.	1.93847	3.66268	1.67489	intergenic
Pf3D7_10_v3	1095082	1095354	Ring_H3K4_peak_482	13	.	1.88532	3.28638	1.3783	intergenic
Pf3D7_10_v3	1123527	1123922	Ring_H3K4_peak_483	10	.	1.74708	2.80738	1.03179	intergenic
Pf3D7_10_v3	1178488	1179012	Ring_H3K4_peak_484	76	.	2.74146	10.1185	7.64002	PF3D7_1028700	MTRAP	merozoite TRAP-like protein
Pf3D7_10_v3	1207122	1207382	Ring_H3K4_peak_485	13	.	1.79452	3.28605	1.3781	PF3D7_1029700		conserved Plasmodium protein, unknown function
Pf3D7_10_v3	1214389	1215027	Ring_H3K4_peak_486	21	.	2.04679	4.22386	2.1373	intergenic
Pf3D7_10_v3	1253711	1253928	Ring_H3K4_peak_487	14	.	1.75354	3.42622	1.48537	PF3D7_1031000	P25	ookinete surface protein P25	PF3D7_1031100		conserved Plasmodium protein, unknown function
Pf3D7_10_v3	1279394	1279680	Ring_H3K4_peak_488	53	.	2.45845	7.72541	5.34305	intergenic
Pf3D7_10_v3	1399931	1400430	Ring_H3K4_peak_489	11	.	1.76143	2.99405	1.1636	intergenic
Pf3D7_10_v3	1409503	1409813	Ring_H3K4_peak_490	17	.	1.86358	3.69921	1.70548	PF3D7_1035600	H101	merozoite surface protein
Pf3D7_10_v3	1603362	1603843	Ring_H3K4_peak_491	17	.	1.97634	3.81005	1.78853	PF3D7_1040100	RIF	rifin
Pf3D7_10_v3	1609847	1610229	Ring_H3K4_peak_492	13	.	1.88217	3.19005	1.30462	PF3D7_1040300	RIF	rifin
Pf3D7_10_v3	1619597	1620076	Ring_H3K4_peak_493	35	.	1.87458	5.84674	3.59828	PF3D7_1040600	RIF	rifin
Pf3D7_10_v3	1622985	1623647	Ring_H3K4_peak_494	21	.	1.77745	4.2823	2.18124	PF3D7_1040700	RIF	rifin
Pf3D7_10_v3	1636286	1636521	Ring_H3K4_peak_495	17	.	1.98144	3.7247	1.71037	PF3D7_1041100	RIF	rifin
Pf3D7_10_v3	1639882	1640369	Ring_H3K4_peak_496	17	.	1.80083	3.71294	1.71276	PF3D7_1041200	RIF	rifin
Pf3D7_10_v3	1644692	1645149	Ring_H3K4_peak_497	36	.	2.2345	6.00539	3.69022	intergenic
Pf3D7_10_v3	1646735	1647645	Ring_H3K4_peak_498	14	.	1.79854	3.36225	1.44604	intergenic
Pf3D7_10_v3	1649023	1649230	Ring_H3K4_peak_499	16	.	1.86829	3.66006	1.6671	intergenic
Pf3D7_10_v3	1649684	1650061	Ring_H3K4_peak_500	12	.	1.79895	3.13981	1.26983	intergenic
Pf3D7_10_v3	1652060	1652730	Ring_H3K4_peak_501	74	.	2.93923	9.93001	7.44543	intergenic
Pf3D7_11_v3	24032	26011	Ring_H3K4_peak_502	27	.	2.0934	4.90387	2.75267	PF3D7_1100100	VAR	erythrocyte membrane protein 1, PfEMP1
Pf3D7_11_v3	26611	27380	Ring_H3K4_peak_503	14	.	1.80912	3.3789	1.45253	intergenic
Pf3D7_11_v3	34769	35146	Ring_H3K4_peak_504	12	.	1.73291	3.11111	1.2461	intergenic
Pf3D7_11_v3	38135	38738	Ring_H3K4_peak_505	13	.	1.8444	3.29808	1.38767	intergenic
Pf3D7_11_v3	39573	40173	Ring_H3K4_peak_506	25	.	1.9701	4.72557	2.55646	intergenic
Pf3D7_11_v3	127077	127300	Ring_H3K4_peak_507	24	.	1.98933	4.62729	2.48179	PF3D7_1102700	ETRAMP11.1	early transcribed membrane protein 11.1
Pf3D7_11_v3	132722	134205	Ring_H3K4_peak_508	139	.	2.73862	16.6045	13.9619	intergenic
Pf3D7_11_v3	142471	142737	Ring_H3K4_peak_509	20	.	2.03741	4.10765	2.03121	intergenic
Pf3D7_11_v3	143230	143621	Ring_H3K4_peak_510	275	.	4.0828	30.5122	27.5303	intergenic
Pf3D7_11_v3	144699	145055	Ring_H3K4_peak_511	180	.	3.43275	20.7861	18.0156	PF3D7_1103400	SufD	iron-sulfur cluster assembly protein SufD
Pf3D7_11_v3	184644	184926	Ring_H3K4_peak_512	14	.	1.84855	3.31695	1.40347	intergenic
Pf3D7_11_v3	200835	201238	Ring_H3K4_peak_513	71	.	2.87289	9.62408	7.13386	intergenic
Pf3D7_11_v3	224024	224358	Ring_H3K4_peak_514	14	.	1.90067	3.3184	1.40593	intergenic
Pf3D7_11_v3	225303	225560	Ring_H3K4_peak_515	73	.	2.96014	9.9086	7.39191	PF3D7_1105100	H2B	histone H2B
Pf3D7_11_v3	309008	309366	Ring_H3K4_peak_516	11	.	1.76049	3.03709	1.19292	intergenic
Pf3D7_11_v3	521197	521512	Ring_H3K4_peak_517	11	.	1.80108	2.95441	1.13725	PF3D7_1113400	DSK2	ubiquitin domain-containing protein DSK2, putative
Pf3D7_11_v3	540627	540895	Ring_H3K4_peak_518	13	.	1.79603	3.29816	1.38863	PF3D7_1114100	ROM1	rhomboid protease ROM1
Pf3D7_11_v3	604541	604914	Ring_H3K4_peak_519	12	.	1.82908	3.07779	1.22688	intergenic
Pf3D7_11_v3	624623	625198	Ring_H3K4_peak_520	16	.	1.87756	3.62715	1.64487	intergenic
Pf3D7_11_v3	641569	642217	Ring_H3K4_peak_521	67	.	2.30701	9.16819	6.71768	intergenic
Pf3D7_11_v3	646351	646984	Ring_H3K4_peak_522	24	.	2.07136	4.54978	2.41721	PF3D7_1117000		MFS domain-containing protein P115, putative
Pf3D7_11_v3	670870	671135	Ring_H3K4_peak_523	12	.	1.85287	3.15299	1.28167	PF3D7_1117700	RAN	GTP-binding nuclear protein RAN/TC4
Pf3D7_11_v3	739868	740275	Ring_H3K4_peak_524	14	.	1.81832	3.38443	1.46031	intergenic
Pf3D7_11_v3	768277	768585	Ring_H3K4_peak_525	13	.	1.86884	3.17771	1.30126	PF3D7_1120400		alpha/beta hydrolase fold domain containing protein, putative
Pf3D7_11_v3	808477	808746	Ring_H3K4_peak_526	42	.	2.32092	6.53244	4.20444	intergenic
Pf3D7_11_v3	817721	818034	Ring_H3K4_peak_527	131	.	2.8975	15.7563	13.1088	PF3D7_1121700	GCN20	protein GCN20
Pf3D7_11_v3	820242	821393	Ring_H3K4_peak_528	13	.	1.80363	3.20195	1.31915	intergenic
Pf3D7_11_v3	847568	847789	Ring_H3K4_peak_529	13	.	1.84736	3.26789	1.36352	PF3D7_1122300		conserved Plasmodium protein, unknown function
Pf3D7_11_v3	927280	927523	Ring_H3K4_peak_530	15	.	1.87537	3.49672	1.53736	intergenic
Pf3D7_11_v3	953225	953463	Ring_H3K4_peak_531	21	.	2.02314	4.19578	2.12622	intergenic
Pf3D7_11_v3	988459	988673	Ring_H3K4_peak_532	46	.	2.52922	6.98975	4.60188	PF3D7_1125200		ubiquitin-like domain-containing protein, putative
Pf3D7_11_v3	1001195	1001560	Ring_H3K4_peak_533	20	.	1.99057	4.0693	2.01212	PF3D7_1125500	SNRPD1	small nuclear ribonucleoprotein Sm D1, putative	PF3D7_1125600	C4AP1	respiratory chain complex 4 associated protein 1
Pf3D7_11_v3	1014397	1014654	Ring_H3K4_peak_534	12	.	1.76292	3.08965	1.2305	PF3D7_1126000	ThrRS	threonine--tRNA ligase
Pf3D7_11_v3	1083940	1084196	Ring_H3K4_peak_535	26	.	2.11546	4.81624	2.64118	PF3D7_1127900		conserved Plasmodium protein, unknown function
Pf3D7_11_v3	1092745	1092951	Ring_H3K4_peak_536	25	.	2.11911	4.73447	2.58662	intergenic
Pf3D7_11_v3	1093608	1093990	Ring_H3K4_peak_537	12	.	1.87124	3.14578	1.28186	PF3D7_1128100		prefoldin subunit 5, putative
Pf3D7_11_v3	1115582	1116112	Ring_H3K4_peak_538	13	.	1.87984	3.19846	1.31004	intergenic
Pf3D7_11_v3	1130263	1130506	Ring_H3K4_peak_539	13	.	1.81206	3.30382	1.39115	PF3D7_1129300		conserved Plasmodium protein, unknown function
Pf3D7_11_v3	1146883	1147120	Ring_H3K4_peak_540	74	.	2.93421	9.957	7.43571	intergenic
Pf3D7_11_v3	1148719	1149040	Ring_H3K4_peak_541	60	.	2.68936	8.48589	6.06331	PF3D7_1129700		conserved Plasmodium protein, unknown function
Pf3D7_11_v3	1165275	1165480	Ring_H3K4_peak_542	13	.	1.78353	3.18908	1.30616	intergenic
Pf3D7_11_v3	1182394	1182868	Ring_H3K4_peak_543	32	.	2.18318	5.43054	3.23919	intergenic
Pf3D7_11_v3	1207091	1207384	Ring_H3K4_peak_544	81	.	2.84695	10.6465	8.13356	intergenic
Pf3D7_11_v3	1243734	1244336	Ring_H3K4_peak_545	14	.	1.8126	3.36743	1.43716	PF3D7_1132100		RNA-binding protein, putative
Pf3D7_11_v3	1300441	1301060	Ring_H3K4_peak_546	28	.	2.21018	4.9736	2.82025	PF3D7_1133700		FHA domain-containing protein, putative
Pf3D7_11_v3	1459858	1460081	Ring_H3K4_peak_547	30	.	2.12657	5.34261	3.09681	intergenic
Pf3D7_11_v3	1461268	1461577	Ring_H3K4_peak_548	95	.	2.83564	12.1538	9.55101	PF3D7_1137100		ribosomal protein S9, mitochondrial, putative
Pf3D7_11_v3	1481939	1482144	Ring_H3K4_peak_549	16	.	1.92818	3.60138	1.61334	intergenic
Pf3D7_11_v3	1486359	1487200	Ring_H3K4_peak_550	164	.	3.62773	19.0452	16.4086	PF3D7_1138000		conserved Plasmodium protein, unknown function
Pf3D7_11_v3	1548295	1548741	Ring_H3K4_peak_551	11	.	1.76905	2.95517	1.13534	intergenic
Pf3D7_11_v3	1568788	1569385	Ring_H3K4_peak_552	29	.	2.16525	5.17394	2.95933	intergenic
Pf3D7_11_v3	1862022	1862816	Ring_H3K4_peak_553	74	.	2.67479	9.90989	7.48081	intergenic
Pf3D7_11_v3	1878139	1878402	Ring_H3K4_peak_554	52	.	2.52117	7.67326	5.26981	intergenic
Pf3D7_11_v3	1898142	1898474	Ring_H3K4_peak_555	51	.	2.44546	7.45234	5.10651	PF3D7_1147800	MAEBL	membrane associated erythrocyte binding-like protein
Pf3D7_11_v3	1937295	1937575	Ring_H3K4_peak_556	49	.	2.33683	7.32782	4.97367	intergenic
Pf3D7_11_v3	1943845	1944344	Ring_H3K4_peak_557	24	.	1.87233	4.52501	2.40604	PF3D7_1148900		Plasmodium exported protein, unknown function
Pf3D7_11_v3	2015810	2016298	Ring_H3K4_peak_558	19	.	1.96607	4.03404	1.97066	intergenic
Pf3D7_11_v3	2026035	2026339	Ring_H3K4_peak_559	15	.	1.83397	3.51256	1.55363	PF3D7_1150400	VAR	erythrocyte membrane protein 1, PfEMP1
Pf3D7_11_v3	2030023	2032170	Ring_H3K4_peak_560	55	.	2.4262	7.97606	5.5907	intergenic
Pf3D7_12_v3	14405	14922	Ring_H3K4_peak_561	473	.	6.46792	50.7231	47.3729	intergenic
Pf3D7_12_v3	15767	16089	Ring_H3K4_peak_562	272	.	5.04469	30.2527	27.2672	intergenic
Pf3D7_12_v3	16869	20691	Ring_H3K4_peak_563	22	.	1.99229	4.33789	2.25361	intergenic
Pf3D7_12_v3	21747	22003	Ring_H3K4_peak_564	59	.	2.44909	8.38599	5.96038	intergenic
Pf3D7_12_v3	30337	30723	Ring_H3K4_peak_565	15	.	1.93977	3.54063	1.58733	PF3D7_1200300	RIF	rifin
Pf3D7_12_v3	44294	44525	Ring_H3K4_peak_566	35	.	2.34527	5.77556	3.5018	PF3D7_1200500	RIF	rifin
Pf3D7_12_v3	53858	54440	Ring_H3K4_peak_567	14	.	1.80804	3.35969	1.43137	intergenic
Pf3D7_12_v3	57170	57486	Ring_H3K4_peak_568	13	.	1.83166	3.30779	1.39667	PF3D7_1200610		VAR2CSA uORF
Pf3D7_12_v3	61499	61860	Ring_H3K4_peak_569	179	.	3.9089	20.7206	17.9541	PF3D7_1200700	ACS7	acyl-CoA synthetase
Pf3D7_12_v3	65166	65523	Ring_H3K4_peak_570	15	.	1.67959	3.48222	1.52736	intergenic
Pf3D7_12_v3	116487	116938	Ring_H3K4_peak_571	14	.	1.86741	3.40695	1.46641	PF3D7_1202200	PIC	mitochondrial phosphate carrier protein
Pf3D7_12_v3	203043	203306	Ring_H3K4_peak_572	15	.	1.9196	3.50439	1.5416	PF3D7_1204200		conserved Plasmodium protein, unknown function
Pf3D7_12_v3	205591	205941	Ring_H3K4_peak_573	52	.	2.46036	7.69117	5.27838	intergenic
Pf3D7_12_v3	306432	306759	Ring_H3K4_peak_574	37	.	2.31369	6.07808	3.7992	intergenic
Pf3D7_12_v3	561797	562134	Ring_H3K4_peak_575	12	.	1.79378	3.06241	1.21309	intergenic
Pf3D7_12_v3	576346	576683	Ring_H3K4_peak_576	135	.	3.13469	16.1842	13.5125	PF3D7_1213200	MED18	mediator of RNA polymerase II transcription subunit 18, putative
Pf3D7_12_v3	596321	596696	Ring_H3K4_peak_577	10	.	1.65843	2.87308	1.07883	intergenic
Pf3D7_12_v3	600024	600346	Ring_H3K4_peak_578	67	.	2.66504	9.20631	6.75789	intergenic
Pf3D7_12_v3	605938	606405	Ring_H3K4_peak_579	16	.	1.87396	3.61059	1.62479	PF3D7_1214200	SET5	histone-lysine N-methyltransferase SET5
Pf3D7_12_v3	625398	625838	Ring_H3K4_peak_580	12	.	1.80098	3.08415	1.22691	intergenic
Pf3D7_12_v3	649524	649935	Ring_H3K4_peak_581	11	.	1.74825	3.01978	1.18025	intergenic
Pf3D7_12_v3	665666	665888	Ring_H3K4_peak_582	18	.	1.88695	3.8715	1.85226	intergenic
Pf3D7_12_v3	666752	667092	Ring_H3K4_peak_583	208	.	4.05923	23.6324	20.8041	intergenic
Pf3D7_12_v3	672898	673234	Ring_H3K4_peak_584	14	.	1.86811	3.33944	1.41685	intergenic
Pf3D7_12_v3	691627	691842	Ring_H3K4_peak_585	39	.	2.2897	6.26726	3.97597	PF3D7_1217500		conserved Plasmodium protein, unknown function
Pf3D7_12_v3	766737	767266	Ring_H3K4_peak_586	18	.	1.99721	3.8481	1.82135	PF3D7_1219300	VAR	erythrocyte membrane protein 1, PfEMP1
Pf3D7_12_v3	768716	769526	Ring_H3K4_peak_587	42	.	2.35283	6.55568	4.22854	intergenic
Pf3D7_12_v3	770485	771913	Ring_H3K4_peak_588	14	.	1.78594	3.37724	1.45208	intergenic
Pf3D7_12_v3	772358	774354	Ring_H3K4_peak_589	49	.	2.36446	7.24616	4.94612	intergenic
Pf3D7_12_v3	775134	775379	Ring_H3K4_peak_590	167	.	3.8925	19.553	16.7872	intergenic
Pf3D7_12_v3	775916	777919	Ring_H3K4_peak_591	62	.	2.49179	8.51049	6.2218	intergenic
Pf3D7_12_v3	778859	779141	Ring_H3K4_peak_592	21	.	1.945	4.27895	2.18482	intergenic
Pf3D7_12_v3	831682	831887	Ring_H3K4_peak_593	14	.	1.87015	3.38374	1.45454	PF3D7_1220900	HP1	heterochromatin protein 1
Pf3D7_12_v3	907235	908278	Ring_H3K4_peak_594	13	.	1.79906	3.20828	1.31928	intergenic
Pf3D7_12_v3	913635	914353	Ring_H3K4_peak_595	15	.	1.87154	3.47077	1.52296	intergenic
Pf3D7_12_v3	917398	917690	Ring_H3K4_peak_596	19	.	1.97833	3.98136	1.92226	PF3D7_1222700	GAP45	glideosome-associated protein 45
Pf3D7_12_v3	989307	989776	Ring_H3K4_peak_597	15	.	1.85682	3.53703	1.57151	intergenic
Pf3D7_12_v3	990504	991111	Ring_H3K4_peak_598	15	.	1.81187	3.4973	1.53807	intergenic
Pf3D7_12_v3	1057349	1057591	Ring_H3K4_peak_599	24	.	2.07403	4.61538	2.47079	PF3D7_1226100	HAD3	haloacid dehalogenase-like hydrolase, putative
Pf3D7_12_v3	1194109	1194346	Ring_H3K4_peak_600	25	.	2.0778	4.67047	2.52218	intergenic
Pf3D7_12_v3	1197043	1197316	Ring_H3K4_peak_601	14	.	1.88947	3.41089	1.47501	intergenic
Pf3D7_12_v3	1198769	1199156	Ring_H3K4_peak_602	15	.	1.9476	3.46178	1.50453	intergenic
Pf3D7_12_v3	1201709	1202477	Ring_H3K4_peak_603	16	.	1.81361	3.59474	1.61784	intergenic
Pf3D7_12_v3	1213904	1214200	Ring_H3K4_peak_604	78	.	2.99484	10.3968	7.88458	PF3D7_1229600		conserved Plasmodium protein, unknown function
Pf3D7_12_v3	1214743	1215052	Ring_H3K4_peak_605	13	.	1.75292	3.29178	1.3856	intergenic
Pf3D7_12_v3	1261286	1261998	Ring_H3K4_peak_606	12	.	1.76482	3.05367	1.20769	intergenic
Pf3D7_12_v3	1264920	1265498	Ring_H3K4_peak_607	13	.	1.84079	3.24332	1.34527	intergenic
Pf3D7_12_v3	1272831	1273247	Ring_H3K4_peak_608	12	.	1.7993	3.05995	1.21327	intergenic
Pf3D7_12_v3	1309166	1309893	Ring_H3K4_peak_609	87	.	2.72698	11.2004	8.75829	intergenic
Pf3D7_12_v3	1370294	1370553	Ring_H3K4_peak_610	12	.	1.81717	3.16564	1.28823	intergenic
Pf3D7_12_v3	1458527	1458855	Ring_H3K4_peak_611	29	.	2.21121	5.15171	2.94241	PF3D7_1234900		CHCH domain-containing protein, putative
Pf3D7_12_v3	1509716	1509921	Ring_H3K4_peak_612	31	.	2.23034	5.41809	3.19202	intergenic
Pf3D7_12_v3	1524129	1525522	Ring_H3K4_peak_613	19	.	1.98066	3.98392	1.94375	PF3D7_1236500		conserved Plasmodium protein, unknown function
Pf3D7_12_v3	1547881	1548418	Ring_H3K4_peak_614	13	.	1.83071	3.25967	1.3604	intergenic
Pf3D7_12_v3	1611783	1612076	Ring_H3K4_peak_615	14	.	1.80985	3.41577	1.47374	PF3D7_1238900	PK2	protein kinase 2
Pf3D7_12_v3	1621710	1622034	Ring_H3K4_peak_616	10	.	1.73192	2.8387	1.05423	intergenic
Pf3D7_12_v3	1651239	1651532	Ring_H3K4_peak_617	11	.	1.75543	2.92427	1.11237	intergenic
Pf3D7_12_v3	1696035	1697246	Ring_H3K4_peak_618	29	.	2.15025	5.11913	2.9391	intergenic
Pf3D7_12_v3	1698378	1699372	Ring_H3K4_peak_619	24	.	2.00464	4.55553	2.41696	intergenic
Pf3D7_12_v3	1700160	1700687	Ring_H3K4_peak_620	17	.	1.97725	3.73027	1.74148	intergenic
Pf3D7_12_v3	1703352	1703563	Ring_H3K4_peak_621	81	.	3.07631	10.7077	8.14115	PF3D7_1240400	VAR	erythrocyte membrane protein 1, PfEMP1
Pf3D7_12_v3	1704403	1705477	Ring_H3K4_peak_622	17	.	1.91369	3.71971	1.71749	PF3D7_1240400	VAR	erythrocyte membrane protein 1, PfEMP1
Pf3D7_12_v3	1706002	1706439	Ring_H3K4_peak_623	46	.	2.3729	7.00807	4.665	intergenic
Pf3D7_12_v3	1707835	1710031	Ring_H3K4_peak_624	61	.	2.05486	8.47003	6.19521	intergenic
Pf3D7_12_v3	1719548	1723050	Ring_H3K4_peak_625	76	.	2.2845	9.98497	7.60758	intergenic
Pf3D7_12_v3	1725065	1725320	Ring_H3K4_peak_626	31	.	2.10636	5.34183	3.10469	intergenic
Pf3D7_12_v3	1735504	1735826	Ring_H3K4_peak_627	17	.	1.91552	3.7931	1.77659	PF3D7_1240900	VAR	erythrocyte membrane protein 1, PfEMP1
Pf3D7_12_v3	1737732	1738222	Ring_H3K4_peak_628	18	.	1.90416	3.94211	1.89435	intergenic
Pf3D7_12_v3	1739002	1739533	Ring_H3K4_peak_629	16	.	1.95468	3.62121	1.63747	intergenic
Pf3D7_12_v3	1824265	1824502	Ring_H3K4_peak_630	40	.	2.36433	6.40122	4.07933	PF3D7_1243600		translation initiation factor SUI1, putative
Pf3D7_12_v3	1857762	1858082	Ring_H3K4_peak_631	43	.	2.06402	6.6561	4.34502	intergenic
Pf3D7_12_v3	1859017	1859243	Ring_H3K4_peak_632	29	.	2.11586	5.1763	2.9592	PF3D7_1244400		RNA-binding protein, putative
Pf3D7_12_v3	1871898	1872363	Ring_H3K4_peak_633	18	.	2.00063	3.86894	1.83322	PF3D7_1244800		translation machinery-associated protein 46, putative
Pf3D7_12_v3	1898382	1898785	Ring_H3K4_peak_634	151	.	3.67321	17.8323	15.1709	intergenic
Pf3D7_12_v3	1920925	1921827	Ring_H3K4_peak_635	17	.	1.93512	3.7918	1.77583	intergenic
Pf3D7_12_v3	1982062	1982578	Ring_H3K4_peak_636	14	.	1.83987	3.36486	1.43807	PF3D7_1248400		conserved Plasmodium protein, unknown function	PF3D7_1248500		bax inhibitor 1, putative
Pf3D7_12_v3	2112742	2113048	Ring_H3K4_peak_637	78	.	2.79822	10.3668	7.85333	intergenic
Pf3D7_12_v3	2113600	2113889	Ring_H3K4_peak_638	47	.	2.30163	7.0728	4.70759	PF3D7_1252100	RON3	rhoptry neck protein 3
Pf3D7_12_v3	2166257	2166504	Ring_H3K4_peak_639	81	.	2.83494	10.7332	8.17167	PF3D7_1253000	GECO	gametocyte erythrocyte cytosolic protein
Pf3D7_12_v3	2169344	2169567	Ring_H3K4_peak_640	12	.	1.7919	3.08471	1.22917	intergenic
Pf3D7_12_v3	2189109	2189379	Ring_H3K4_peak_641	18	.	2.02282	3.86765	1.83094	intergenic
Pf3D7_12_v3	2202168	2202388	Ring_H3K4_peak_642	21	.	2.05703	4.19611	2.11912	PF3D7_1254000	RIF	rifin
Pf3D7_12_v3	2218922	2219366	Ring_H3K4_peak_643	15	.	1.90995	3.50406	1.54566	PF3D7_1254500	RIF	rifin
Pf3D7_12_v3	2238831	2239310	Ring_H3K4_peak_644	13	.	1.87311	3.21766	1.33149	PF3D7_1255100	RIF	rifin
Pf3D7_12_v3	2243465	2243938	Ring_H3K4_peak_645	22	.	2.01771	4.35024	2.23019	intergenic
Pf3D7_12_v3	2246019	2248218	Ring_H3K4_peak_646	21	.	1.93707	4.21284	2.12991	intergenic
Pf3D7_12_v3	2248698	2249038	Ring_H3K4_peak_647	34	.	2.24012	5.74297	3.47355	intergenic
Pf3D7_12_v3	2251238	2251705	Ring_H3K4_peak_648	188	.	4.15387	21.6938	18.8655	intergenic
Pf3D7_13_v3	25980	26557	Ring_H3K4_peak_649	19	.	1.98201	4.02228	1.98899	intergenic
Pf3D7_13_v3	41047	41302	Ring_H3K4_peak_650	24	.	2.00851	4.61176	2.46395	intergenic
Pf3D7_13_v3	41713	42192	Ring_H3K4_peak_651	24	.	2.07058	4.61875	2.49434	intergenic
Pf3D7_13_v3	51512	51744	Ring_H3K4_peak_652	20	.	1.98252	4.14196	2.06712	PF3D7_1300500	RIF	rifin
Pf3D7_13_v3	57233	57767	Ring_H3K4_peak_653	15	.	1.92814	3.50075	1.54388	PF3D7_1300700	RIF	rifin
Pf3D7_13_v3	62616	63007	Ring_H3K4_peak_654	21	.	2.02316	4.23447	2.13518	PF3D7_1300900		stevor
Pf3D7_13_v3	87531	87761	Ring_H3K4_peak_655	33	.	2.27064	5.64973	3.38674	PF3D7_1301600	EBA140	erythrocyte binding antigen-140
Pf3D7_13_v3	90860	91185	Ring_H3K4_peak_656	11	.	1.76596	3.04631	1.19913	intergenic
Pf3D7_13_v3	97876	98805	Ring_H3K4_peak_657	15	.	1.91208	3.55382	1.5913	PF3D7_1301700	CBP2	CX3CL1-binding protein 2
Pf3D7_13_v3	99954	100393	Ring_H3K4_peak_658	17	.	1.92091	3.78479	1.77441	intergenic
Pf3D7_13_v3	110762	111143	Ring_H3K4_peak_659	85	.	2.84967	11.1231	8.59932	intergenic
Pf3D7_13_v3	117814	118138	Ring_H3K4_peak_660	64	.	2.65777	8.90211	6.48868	PF3D7_1302050		hypothetical protein
Pf3D7_13_v3	156621	156956	Ring_H3K4_peak_661	22	.	1.95392	4.35316	2.236	intergenic
Pf3D7_13_v3	192316	192537	Ring_H3K4_peak_662	19	.	1.86218	4.02238	1.96087	intergenic
Pf3D7_13_v3	199888	200375	Ring_H3K4_peak_663	39	.	2.29595	6.23005	3.9221	intergenic
Pf3D7_13_v3	371065	371270	Ring_H3K4_peak_664	18	.	1.95113	3.90877	1.85492	PF3D7_1308300	RPS27	40S ribosomal protein S27
Pf3D7_13_v3	395387	395641	Ring_H3K4_peak_665	22	.	2.08068	4.28545	2.20366	intergenic
Pf3D7_13_v3	416106	416313	Ring_H3K4_peak_666	16	.	1.86468	3.60526	1.62568	PF3D7_1309000		conserved protein, unknown function
Pf3D7_13_v3	476660	477131	Ring_H3K4_peak_667	18	.	1.97742	3.92507	1.88382	PF3D7_1310900		ribosomal protein S15, mitochondrial, putative	PF3D7_1311000	ISD11	protein ISD11
Pf3D7_13_v3	547354	547581	Ring_H3K4_peak_668	60	.	2.75504	8.53923	6.06468	PF3D7_1312900	EIF4G	eukaryotic translation initation factor 4 gamma
Pf3D7_13_v3	646229	646510	Ring_H3K4_peak_669	12	.	1.83599	3.13715	1.26735	PF3D7_1315400		zinc finger (CCCH type) protein, putative
Pf3D7_13_v3	779983	780375	Ring_H3K4_peak_670	17	.	1.89089	3.72694	1.71703	intergenic
Pf3D7_13_v3	954179	954443	Ring_H3K4_peak_671	15	.	1.87184	3.53404	1.56724	intergenic
Pf3D7_13_v3	975561	976115	Ring_H3K4_peak_672	19	.	1.97165	3.93416	1.90293	intergenic
Pf3D7_13_v3	979131	979547	Ring_H3K4_peak_673	12	.	1.7962	3.10466	1.24077	PF3D7_1323600		conserved protein, unknown function
Pf3D7_13_v3	1004927	1005631	Ring_H3K4_peak_674	27	.	2.16363	4.9246	2.74066	intergenic
Pf3D7_13_v3	1039702	1040519	Ring_H3K4_peak_675	246	.	4.11299	27.478	24.648	PF3D7_1324900	LDH	L-lactate dehydrogenase
Pf3D7_13_v3	1045035	1045408	Ring_H3K4_peak_676	21	.	1.95723	4.19732	2.12975	intergenic
Pf3D7_13_v3	1147755	1148103	Ring_H3K4_peak_677	12	.	1.82394	3.07748	1.22531	intergenic
Pf3D7_13_v3	1167315	1167529	Ring_H3K4_peak_678	38	.	2.23596	6.20515	3.8858	intergenic
Pf3D7_13_v3	1184377	1184643	Ring_H3K4_peak_679	13	.	1.79422	3.27157	1.37524	PF3D7_1328100		proteasome subunit beta type-7, putative
Pf3D7_13_v3	1222548	1222892	Ring_H3K4_peak_680	19	.	2.0072	3.99393	1.95261	intergenic
Pf3D7_13_v3	1247121	1248147	Ring_H3K4_peak_681	56	.	2.12372	7.92153	5.6137	intergenic
Pf3D7_13_v3	1254782	1256072	Ring_H3K4_peak_682	16	.	1.93089	3.5884	1.6323	intergenic
Pf3D7_13_v3	1257564	1257979	Ring_H3K4_peak_683	31	.	2.15983	5.38031	3.17919	PF3D7_1329600		conserved Plasmodium protein, unknown function
Pf3D7_13_v3	1282179	1282491	Ring_H3K4_peak_684	38	.	2.36905	6.1094	3.8246	intergenic
Pf3D7_13_v3	1284061	1284712	Ring_H3K4_peak_685	113	.	3.39506	14.0376	11.3919	PF3D7_1330500		CTLH domain-containing protein, putative
Pf3D7_13_v3	1319498	1319717	Ring_H3K4_peak_686	12	.	1.74122	3.13386	1.26336	PF3D7_1331700		glutamine--tRNA ligase, putative
Pf3D7_13_v3	1369620	1369861	Ring_H3K4_peak_687	23	.	1.99535	4.53606	2.39795	PF3D7_1333400		AMMECR1 domain-containing protein, putative
Pf3D7_13_v3	1409406	1409822	Ring_H3K4_peak_688	10	.	1.79272	2.89995	1.09759	PF3D7_1334700	MSRP7	MSP7-like protein
Pf3D7_13_v3	1416736	1417100	Ring_H3K4_peak_689	20	.	1.9255	4.10865	2.0712	intergenic
Pf3D7_13_v3	1420506	1420756	Ring_H3K4_peak_690	32	.	2.23776	5.47259	3.22854	intergenic
Pf3D7_13_v3	1421192	1421410	Ring_H3K4_peak_691	16	.	1.91106	3.68902	1.69933	intergenic
Pf3D7_13_v3	1524080	1524306	Ring_H3K4_peak_692	39	.	2.35826	6.20692	3.92954	PF3D7_1337700	PH2	phosphoinositide-binding protein PH2
Pf3D7_13_v3	1561326	1561662	Ring_H3K4_peak_693	13	.	1.84773	3.27297	1.368	PF3D7_1338700		conserved protein, unknown function
Pf3D7_13_v3	1575302	1575554	Ring_H3K4_peak_694	31	.	2.01756	5.35461	3.12398	intergenic
Pf3D7_13_v3	1576820	1577175	Ring_H3K4_peak_695	169	.	3.57848	19.6529	16.9467	intergenic
Pf3D7_13_v3	1580196	1580707	Ring_H3K4_peak_696	54	.	2.68248	7.87756	5.42554	PF3D7_1339300		conserved protein, unknown function
Pf3D7_13_v3	1618566	1618788	Ring_H3K4_peak_697	25	.	2.07196	4.63628	2.51388	intergenic
Pf3D7_13_v3	1628711	1629248	Ring_H3K4_peak_698	14	.	1.86039	3.38041	1.45206	intergenic
Pf3D7_13_v3	1631230	1631461	Ring_H3K4_peak_699	36	.	2.23473	5.86091	3.60666	intergenic
Pf3D7_13_v3	1632514	1633352	Ring_H3K4_peak_700	46	.	2.49714	6.96605	4.63999	PF3D7_1341200		60S ribosomal protein L18, putative
Pf3D7_13_v3	1648232	1648440	Ring_H3K4_peak_701	20	.	2.02413	4.11226	2.03459	PF3D7_1341900		V-type proton ATPase subunit D, putative
Pf3D7_13_v3	1657779	1658267	Ring_H3K4_peak_702	14	.	1.84212	3.34164	1.41958	intergenic
Pf3D7_13_v3	1674429	1674757	Ring_H3K4_peak_703	48	.	2.38154	7.2277	4.86999	intergenic
Pf3D7_13_v3	1675817	1676451	Ring_H3K4_peak_704	20	.	2.01759	4.13514	2.07181	intergenic
Pf3D7_13_v3	1695394	1696129	Ring_H3K4_peak_705	28	.	2.09656	4.98485	2.82537	PF3D7_1343000	PMT	phosphoethanolamine N-methyltransferase
Pf3D7_13_v3	1811042	1811294	Ring_H3K4_peak_706	21	.	1.95302	4.28112	2.17789	PF3D7_1345200	ROM6	rhomboid protease ROM6, putative
Pf3D7_13_v3	1890112	1890317	Ring_H3K4_peak_707	27	.	2.11193	4.91713	2.73837	PF3D7_1347200	NT1	nucleoside transporter 1
Pf3D7_13_v3	1898156	1898382	Ring_H3K4_peak_708	11	.	1.78075	2.97578	1.15009	intergenic
Pf3D7_13_v3	2015349	2015569	Ring_H3K4_peak_709	14	.	1.80543	3.32817	1.40975	PF3D7_1350500		conserved Plasmodium protein, unknown function
Pf3D7_13_v3	2126538	2127069	Ring_H3K4_peak_710	38	.	2.25507	6.17169	3.88353	intergenic
Pf3D7_13_v3	2267979	2268281	Ring_H3K4_peak_711	11	.	1.84401	2.98751	1.1584	intergenic
Pf3D7_13_v3	2296630	2296905	Ring_H3K4_peak_712	21	.	1.95153	4.21956	2.13154	PF3D7_1358000		patatin-like phospholipase, putative
Pf3D7_13_v3	2407996	2408283	Ring_H3K4_peak_713	12	.	1.84612	3.15672	1.28652	PF3D7_1360300		conserved Plasmodium protein, unknown function
Pf3D7_13_v3	2489599	2489822	Ring_H3K4_peak_714	52	.	2.64511	7.70872	5.28667	PF3D7_1362200	RUVB3	RuvB-like helicase 3
Pf3D7_13_v3	2510320	2511710	Ring_H3K4_peak_715	52	.	2.49167	7.52048	5.23282	intergenic
Pf3D7_13_v3	2609528	2610003	Ring_H3K4_peak_716	12	.	1.87562	3.1115	1.24154	PF3D7_1365100	mtRPS17	ribosomal protein S17, mitochondrial
Pf3D7_13_v3	2714380	2714685	Ring_H3K4_peak_717	14	.	1.84945	3.41782	1.4806	intergenic
Pf3D7_13_v3	2780223	2780542	Ring_H3K4_peak_718	127	.	2.86611	15.3625	12.7345	intergenic
Pf3D7_13_v3	2780974	2781782	Ring_H3K4_peak_719	173	.	3.38237	20.0994	17.3534	intergenic
Pf3D7_13_v3	2783071	2783898	Ring_H3K4_peak_720	78	.	2.58638	10.3678	7.86069	intergenic
Pf3D7_13_v3	2784844	2785070	Ring_H3K4_peak_721	25	.	2.05487	4.66266	2.50356	intergenic
Pf3D7_13_v3	2785882	2787170	Ring_H3K4_peak_722	48	.	2.30168	7.1447	4.84947	PF3D7_1370300	MAHRP1	membrane associated histidine-rich protein 1
Pf3D7_13_v3	2842466	2843024	Ring_H3K4_peak_723	26	.	2.03395	4.804	2.67781	PF3D7_1372300		Plasmodium exported protein (PHIST), unknown function
Pf3D7_13_v3	2857463	2857914	Ring_H3K4_peak_724	12	.	1.82545	3.06064	1.21217	intergenic
Pf3D7_13_v3	2860840	2861272	Ring_H3K4_peak_725	13	.	1.8629	3.21917	1.3295	PF3D7_1372700	RIF	rifin
Pf3D7_13_v3	2871960	2872430	Ring_H3K4_peak_726	11	.	1.78091	3.02025	1.18264	PF3D7_1373100	RIF	rifin
Pf3D7_13_v3	2878457	2878892	Ring_H3K4_peak_727	18	.	2.01445	3.83104	1.80375	PF3D7_1373300	RIF	rifin
Pf3D7_13_v3	2882331	2882721	Ring_H3K4_peak_728	11	.	1.75371	3.0043	1.16878	PF3D7_1373400	RIF	rifin
Pf3D7_13_v3	2886995	2887433	Ring_H3K4_peak_729	41	.	2.36042	6.49873	4.15991	intergenic
Pf3D7_13_v3	2888108	2888624	Ring_H3K4_peak_730	15	.	1.84775	3.45541	1.50456	intergenic
Pf3D7_13_v3	2889977	2892472	Ring_H3K4_peak_731	24	.	2.04786	4.56393	2.4995	intergenic
Pf3D7_13_v3	2893293	2893523	Ring_H3K4_peak_732	89	.	3.18168	11.5799	8.99435	intergenic
Pf3D7_13_v3	2916776	2916989	Ring_H3K4_peak_733	41	.	2.47081	6.50785	4.1973	intergenic
Pf3D7_14_v3	1624	1904	Ring_H3K4_peak_734	18	.	1.96279	3.89252	1.85835	intergenic
Pf3D7_14_v3	2453	3127	Ring_H3K4_peak_735	43	.	2.3563	6.61669	4.30567	intergenic
Pf3D7_14_v3	14432	15197	Ring_H3K4_peak_736	21	.	2.02806	4.20546	2.12207	PF3D7_1400400	RIF	rifin
Pf3D7_14_v3	17529	18093	Ring_H3K4_peak_737	18	.	1.98178	3.84987	1.84023	PF3D7_1400500	RIF	rifin
Pf3D7_14_v3	24422	24664	Ring_H3K4_peak_738	17	.	1.92309	3.7759	1.75762	PF3D7_1400700		stevor
Pf3D7_14_v3	27441	28001	Ring_H3K4_peak_739	22	.	2.05597	4.34568	2.26611	PF3D7_1400800	RIF	rifin
Pf3D7_14_v3	37155	37490	Ring_H3K4_peak_740	52	.	2.503	7.58464	5.21352	intergenic
Pf3D7_14_v3	55542	56143	Ring_H3K4_peak_741	49	.	2.50828	7.33848	4.94619	PF3D7_1401500		esterase, putative
Pf3D7_14_v3	150219	150486	Ring_H3K4_peak_742	16	.	1.80421	3.6876	1.69539	PF3D7_1404300	SOAP	secreted ookinete adhesive protein, putative
Pf3D7_14_v3	168448	168969	Ring_H3K4_peak_743	57	.	2.2398	8.1877	5.78986	PF3D7_1404900		conserved Plasmodium protein, unknown function
Pf3D7_14_v3	247416	247684	Ring_H3K4_peak_744	24	.	2.03799	4.61265	2.47153	intergenic
Pf3D7_14_v3	259433	259714	Ring_H3K4_peak_745	16	.	1.82354	3.61785	1.64849	intergenic
Pf3D7_14_v3	323302	323543	Ring_H3K4_peak_746	39	.	2.31011	6.27821	3.95098	PF3D7_1408700		conserved protein, unknown function
Pf3D7_14_v3	359115	359329	Ring_H3K4_peak_747	23	.	2.04732	4.42139	2.31123	intergenic
Pf3D7_14_v3	428203	428502	Ring_H3K4_peak_748	22	.	2.05857	4.36704	2.26982	PF3D7_1410700		conserved protein, unknown function
Pf3D7_14_v3	482464	482680	Ring_H3K4_peak_749	14	.	1.81891	3.37475	1.44848	PF3D7_1412000		p1/s1 nuclease, putative
Pf3D7_14_v3	524787	524992	Ring_H3K4_peak_750	17	.	1.86966	3.73726	1.72447	PF3D7_1413000		conserved Plasmodium protein, unknown function
Pf3D7_14_v3	666482	666766	Ring_H3K4_peak_751	61	.	2.48819	8.63285	6.1984	PF3D7_1416500	GDH1	NADP-specific glutamate dehydrogenase
Pf3D7_14_v3	777992	778236	Ring_H3K4_peak_752	67	.	2.55204	9.2135	6.72555	intergenic
Pf3D7_14_v3	779260	780206	Ring_H3K4_peak_753	247	.	4.28666	27.6801	24.7583	intergenic
Pf3D7_14_v3	780727	781126	Ring_H3K4_peak_754	311	.	4.19756	34.176	31.1251	intergenic
Pf3D7_14_v3	781916	782506	Ring_H3K4_peak_755	200	.	3.69617	22.7742	20.0152	PF3D7_1418900	DBP4	ATP-dependent RNA helicase DBP4, putative
Pf3D7_14_v3	823581	824179	Ring_H3K4_peak_756	12	.	1.86541	3.14751	1.27622	intergenic
Pf3D7_14_v3	938652	939100	Ring_H3K4_peak_757	28	.	2.06393	5.0077	2.84143	intergenic
Pf3D7_14_v3	971952	972507	Ring_H3K4_peak_758	14	.	1.91452	3.36514	1.43756	intergenic
Pf3D7_14_v3	978377	979007	Ring_H3K4_peak_759	14	.	1.78763	3.39169	1.45982	intergenic
Pf3D7_14_v3	986491	986741	Ring_H3K4_peak_760	31	.	2.27428	5.36488	3.14875	intergenic
Pf3D7_14_v3	999272	999813	Ring_H3K4_peak_761	15	.	1.87049	3.56382	1.59155	intergenic
Pf3D7_14_v3	1021681	1021948	Ring_H3K4_peak_762	25	.	2.17347	4.66691	2.50271	PF3D7_1426200	PRMT1	protein arginine N-methyltransferase 1
Pf3D7_14_v3	1026566	1027008	Ring_H3K4_peak_763	55	.	2.52638	7.9227	5.55526	PF3D7_1426400		MORN repeat protein, putative	PF3D7_1426500	ABCG2	ABC transporter G family member 2
Pf3D7_14_v3	1028056	1028365	Ring_H3K4_peak_764	12	.	1.8302	3.17154	1.29198	PF3D7_1426500	ABCG2	ABC transporter G family member 2
Pf3D7_14_v3	1029781	1030627	Ring_H3K4_peak_765	111	.	3.30738	13.6741	11.1048	PF3D7_1426600		conserved Plasmodium protein, unknown function
Pf3D7_14_v3	1054812	1055383	Ring_H3K4_peak_766	166	.	3.59689	19.208	16.6038	PF3D7_1427100		lipase, putative
Pf3D7_14_v3	1093364	1093607	Ring_H3K4_peak_767	12	.	1.79954	3.15599	1.27893	PF3D7_1428000		conserved Plasmodium membrane protein, unknown function
Pf3D7_14_v3	1101617	1102263	Ring_H3K4_peak_768	15	.	1.87052	3.48781	1.53125	intergenic
Pf3D7_14_v3	1211407	1211868	Ring_H3K4_peak_769	14	.	1.86445	3.36947	1.44853	PF3D7_1430700	GDH2	NADP-specific glutamate dehydrogenase
Pf3D7_14_v3	1236797	1237020	Ring_H3K4_peak_770	30	.	2.11204	5.25428	3.04889	intergenic
Pf3D7_14_v3	1369846	1370225	Ring_H3K4_peak_771	31	.	2.22142	5.35914	3.12075	PF3D7_1434300	HOP	Hsp70/Hsp90 organizing protein
Pf3D7_14_v3	1372537	1372912	Ring_H3K4_peak_772	71	.	2.80672	9.65143	7.168	intergenic
Pf3D7_14_v3	1476629	1476986	Ring_H3K4_peak_773	40	.	2.19857	6.36913	4.08348	PF3D7_1436300	PTEX150	translocon component PTEX150
Pf3D7_14_v3	1477486	1478008	Ring_H3K4_peak_774	109	.	2.74258	13.5817	10.9468	intergenic
Pf3D7_14_v3	1568583	1568869	Ring_H3K4_peak_775	25	.	2.14232	4.71846	2.55798	intergenic
Pf3D7_14_v3	1623275	1623539	Ring_H3K4_peak_776	11	.	1.72619	3.003	1.16749	PF3D7_1440000		conserved Plasmodium protein, unknown function
Pf3D7_14_v3	1680647	1680876	Ring_H3K4_peak_777	23	.	2.01399	4.49398	2.37058	PF3D7_1441300		serine/threonine protein kinase, putative
Pf3D7_14_v3	1846716	1846940	Ring_H3K4_peak_778	26	.	1.99056	4.79799	2.61716	intergenic
Pf3D7_14_v3	1889233	1889593	Ring_H3K4_peak_779	211	.	3.81813	24.0129	21.1755	PF3D7_1446100		conserved Plasmodium protein, unknown function
Pf3D7_14_v3	1895084	1895453	Ring_H3K4_peak_780	51	.	2.45705	7.45343	5.11119	intergenic
Pf3D7_14_v3	1903377	1903836	Ring_H3K4_peak_781	16	.	1.89023	3.62468	1.63669	intergenic
Pf3D7_14_v3	1938072	1938476	Ring_H3K4_peak_782	41	.	2.3759	6.49138	4.16516	PF3D7_1447400		conserved Plasmodium protein, unknown function
Pf3D7_14_v3	2089375	2089586	Ring_H3K4_peak_783	23	.	2.08699	4.43119	2.30352	PF3D7_1451100	eEF2	elongation factor 2
Pf3D7_14_v3	2091795	2092986	Ring_H3K4_peak_784	16	.	1.84706	3.57621	1.61508	intergenic
Pf3D7_14_v3	2099517	2099759	Ring_H3K4_peak_785	29	.	2.00994	5.21607	2.99933	intergenic
Pf3D7_14_v3	2102351	2102692	Ring_H3K4_peak_786	51	.	2.50558	7.58581	5.19524	intergenic
Pf3D7_14_v3	2140281	2140718	Ring_H3K4_peak_787	12	.	1.77437	3.10881	1.24482	PF3D7_1452100	LRR3	leucine-rich repeat protein
Pf3D7_14_v3	2244011	2244219	Ring_H3K4_peak_788	26	.	2.13507	4.77351	2.60256	PF3D7_1454800		conserved Plasmodium protein, unknown function	PF3D7_1454900		conserved protein, unknown function
Pf3D7_14_v3	2245068	2245400	Ring_H3K4_peak_789	16	.	1.91467	3.60149	1.62031	PF3D7_1454900		conserved protein, unknown function
Pf3D7_14_v3	2260049	2260322	Ring_H3K4_peak_790	38	.	2.25761	6.09825	3.81145	intergenic
Pf3D7_14_v3	2263117	2263328	Ring_H3K4_peak_791	22	.	2.11112	4.34108	2.21844	PF3D7_1455400	HlyIII	hemolysin III
Pf3D7_14_v3	2331252	2331791	Ring_H3K4_peak_792	15	.	1.80133	3.53142	1.57152	intergenic
Pf3D7_14_v3	2333151	2333380	Ring_H3K4_peak_793	34	.	2.07009	5.68582	3.43164	PF3D7_1456900		conserved protein, unknown function
Pf3D7_14_v3	2381868	2382542	Ring_H3K4_peak_794	261	.	4.26663	29.0766	26.1445	intergenic
Pf3D7_14_v3	2421833	2422320	Ring_H3K4_peak_795	12	.	1.77665	3.12069	1.25424	intergenic
Pf3D7_14_v3	2462520	2462805	Ring_H3K4_peak_796	13	.	1.84916	3.25005	1.35393	intergenic
Pf3D7_14_v3	2494076	2494349	Ring_H3K4_peak_797	12	.	1.78147	3.06583	1.21342	PF3D7_1461400		MORN repeat protein, putative
Pf3D7_14_v3	2557729	2558668	Ring_H3K4_peak_798	28	.	2.13471	4.98256	2.80431	PF3D7_1462800	GAPDH	glyceraldehyde-3-phosphate dehydrogenase
Pf3D7_14_v3	2559519	2560212	Ring_H3K4_peak_799	21	.	1.94349	4.25591	2.17919	intergenic
Pf3D7_14_v3	2649287	2649512	Ring_H3K4_peak_800	12	.	1.84306	3.11541	1.2549	intergenic
Pf3D7_14_v3	2651905	2652196	Ring_H3K4_peak_801	10	.	1.75837	2.88374	1.08521	intergenic
Pf3D7_14_v3	2685108	2685386	Ring_H3K4_peak_802	13	.	1.82428	3.24779	1.34738	PF3D7_1466000		conserved protein, unknown function
Pf3D7_14_v3	2721010	2721586	Ring_H3K4_peak_803	187	.	2.82111	21.5174	18.7866	intergenic
Pf3D7_14_v3	2785858	2786773	Ring_H3K4_peak_804	266	.	2.82464	29.5981	26.6206	PF3D7_1468100	MORC	MORC family protein
Pf3D7_14_v3	2802622	2802892	Ring_H3K4_peak_805	13	.	1.88414	3.27292	1.37382	PF3D7_1468300	LRR14.1	leucine-rich repeat protein
Pf3D7_14_v3	2981642	2982230	Ring_H3K4_peak_806	86	.	2.82846	11.1488	8.63628	intergenic
Pf3D7_14_v3	2988793	2989064	Ring_H3K4_peak_807	68	.	2.80449	9.34509	6.84256	PF3D7_1473400		conserved protein, unknown function
Pf3D7_14_v3	3005018	3005343	Ring_H3K4_peak_808	151	.	3.84	17.8384	15.1419	intergenic
Pf3D7_14_v3	3175935	3176368	Ring_H3K4_peak_809	15	.	1.86064	3.54911	1.58145	PF3D7_1477200		Plasmodium exported protein (hyp15), unknown function
Pf3D7_14_v3	3179613	3180183	Ring_H3K4_peak_810	14	.	1.86519	3.41018	1.47894	intergenic
Pf3D7_14_v3	3210655	3211005	Ring_H3K4_peak_811	13	.	1.78148	3.18406	1.30161	intergenic
Pf3D7_14_v3	3249579	3250040	Ring_H3K4_peak_812	22	.	2.07051	4.40509	2.291	intergenic
Pf_M76611	30	5926	Ring_H3K4_peak_813	383	.	2.43289	41.6232	38.3804	intergenic

## Sheet: File_4b_ChIPseq_trophozoite_pea
Supplementary File 4b: Peak calling result of PfMORC ChIP-seq in trophozoite stage.
chrom	start	end	name	score	strand	signalValue	pValue	qValue	annotation 1	gene name 1	gene description 1	annotation 2	gene name 2	gene description 2	annotation 3	gene name 3	gene description 3
Pf3D7_01_v3	5746	6110	Troph_H3K4_peak_1	135	.	2.72428	15.2828	13.5922	intergenic
Pf3D7_01_v3	8294	10046	Troph_H3K4_peak_2	384	.	4.13759	40.7168	38.4907	intergenic
Pf3D7_01_v3	26885	27491	Troph_H3K4_peak_3	652	.	5.2408	67.6969	65.2125	intergenic
Pf3D7_01_v3	28289	28620	Troph_H3K4_peak_4	149	.	2.81907	16.6354	14.903	intergenic
Pf3D7_01_v3	29302	33302	Troph_H3K4_peak_5	156	.	2.63039	17.4092	15.6604	intergenic
Pf3D7_01_v3	34151	34856	Troph_H3K4_peak_6	545	.	4.35224	56.9342	54.5083	intergenic
Pf3D7_01_v3	43195	43536	Troph_H3K4_peak_7	24	.	1.67296	3.61119	2.40462	PF3D7_0100300	VAR	erythrocyte membrane protein 1, PfEMP1
Pf3D7_01_v3	45620	46727	Troph_H3K4_peak_8	46	.	1.87175	5.96037	4.63168	intergenic
Pf3D7_01_v3	47715	48437	Troph_H3K4_peak_9	95	.	2.32992	11.1373	9.59533	intergenic
Pf3D7_01_v3	50842	51552	Troph_H3K4_peak_10	88	.	2.32916	10.3681	8.83689	PF3D7_0100400	RIF	rifin
Pf3D7_01_v3	54093	54497	Troph_H3K4_peak_11	88	.	2.36045	10.4055	8.88174	PF3D7_0100600	RIF	rifin
Pf3D7_01_v3	58515	59490	Troph_H3K4_peak_12	76	.	2.10798	9.07992	7.64812	PF3D7_0100800	RIF	rifin
Pf3D7_01_v3	60259	61214	Troph_H3K4_peak_13	121	.	2.42436	13.827	12.1977	PF3D7_0100800	RIF	rifin
Pf3D7_01_v3	61613	63232	Troph_H3K4_peak_14	113	.	2.40969	12.9147	11.3089	PF3D7_0100900	RIF	rifin
Pf3D7_01_v3	63797	66707	Troph_H3K4_peak_15	77	.	2.13355	9.24512	7.79784	PF3D7_0101000	RIF	rifin
Pf3D7_01_v3	81829	82680	Troph_H3K4_peak_16	123	.	2.51606	14.0571	12.3893	PF3D7_0101600	RIF	rifin
Pf3D7_01_v3	87276	87639	Troph_H3K4_peak_17	102	.	2.44296	11.7659	10.2028	PF3D7_0101800		stevor
Pf3D7_01_v3	90269	92034	Troph_H3K4_peak_18	103	.	2.28273	11.9063	10.3749	PF3D7_0101900	RIF	rifin
Pf3D7_01_v3	92797	94139	Troph_H3K4_peak_19	44	.	1.82614	5.7699	4.45051	intergenic
Pf3D7_01_v3	95032	95844	Troph_H3K4_peak_20	31	.	1.63399	4.37575	3.12769	intergenic
Pf3D7_01_v3	100326	100588	Troph_H3K4_peak_21	22	.	1.63707	3.40622	2.21388	intergenic
Pf3D7_01_v3	104973	105275	Troph_H3K4_peak_22	76	.	2.2089	9.07915	7.61106	intergenic
Pf3D7_01_v3	143769	144459	Troph_H3K4_peak_23	42	.	1.74972	5.50502	4.20915	PF3D7_0103300		conserved protein, unknown function
Pf3D7_01_v3	148441	148755	Troph_H3K4_peak_24	22	.	1.63471	3.41228	2.22014	intergenic
Pf3D7_01_v3	152379	152637	Troph_H3K4_peak_25	15	.	1.49772	2.63868	1.50969	intergenic
Pf3D7_01_v3	186375	186736	Troph_H3K4_peak_26	62	.	2.1295	7.71721	6.29946	intergenic
Pf3D7_01_v3	219870	220328	Troph_H3K4_peak_27	34	.	1.77182	4.73716	3.46335	PF3D7_0105100		conserved Apicomplexan protein, unknown function
Pf3D7_01_v3	226706	227168	Troph_H3K4_peak_28	12	.	1.46776	2.40036	1.29442	PF3D7_0105400		conserved Plasmodium protein, unknown function
Pf3D7_01_v3	231664	231973	Troph_H3K4_peak_29	31	.	1.66368	4.34738	3.10208	intergenic
Pf3D7_01_v3	259303	259698	Troph_H3K4_peak_30	25	.	1.67033	3.70833	2.50038	PF3D7_0106100		V-type proton ATPase subunit C, putative
Pf3D7_01_v3	264091	264607	Troph_H3K4_peak_31	18	.	1.56177	3.00049	1.84111	PF3D7_0106300	ATP6	calcium-transporting ATPase
Pf3D7_01_v3	278642	279268	Troph_H3K4_peak_32	33	.	1.73638	4.61328	3.35987	PF3D7_0106600		conserved Plasmodium protein, unknown function
Pf3D7_01_v3	291861	292111	Troph_H3K4_peak_33	25	.	1.64647	3.80105	2.58553	intergenic
Pf3D7_01_v3	312340	312950	Troph_H3K4_peak_34	78	.	2.15671	9.308	7.84533	intergenic
Pf3D7_01_v3	315842	316321	Troph_H3K4_peak_35	18	.	1.52443	3.03672	1.87334	intergenic
Pf3D7_01_v3	316960	317730	Troph_H3K4_peak_36	25	.	1.62322	3.80406	2.58281	intergenic
Pf3D7_01_v3	344353	344672	Troph_H3K4_peak_37	94	.	2.27726	10.952	9.41771	PF3D7_0108400		mitochondrial carrier protein, putative
Pf3D7_01_v3	345285	345704	Troph_H3K4_peak_38	20	.	1.59704	3.18001	2.00934	intergenic
Pf3D7_01_v3	347181	348291	Troph_H3K4_peak_39	27	.	1.71475	4.02061	2.79313	PF3D7_0108500		ELM2 domain-containing protein, putative
Pf3D7_01_v3	362659	362987	Troph_H3K4_peak_40	106	.	2.49553	12.2796	10.6935	PF3D7_0109000	PHIL1	photosensitized INA-labeled protein PHIL1
Pf3D7_01_v3	363392	363728	Troph_H3K4_peak_41	14	.	1.44145	2.5324	1.41308	intergenic
Pf3D7_01_v3	406612	407121	Troph_H3K4_peak_42	21	.	1.57009	3.37951	2.19617	intergenic
Pf3D7_01_v3	416536	416801	Troph_H3K4_peak_43	16	.	1.56361	2.78407	1.64101	PF3D7_0110800		transcription initiation factor TFIIB, putative
Pf3D7_01_v3	439104	439334	Troph_H3K4_peak_44	19	.	1.59172	3.13522	1.96317	PF3D7_0111500		UMP-CMP kinase, putative
Pf3D7_01_v3	451164	451400	Troph_H3K4_peak_45	50	.	1.95227	6.45574	5.09034	PF3D7_0112000	TatD	TatD-like deoxyribonuclease
Pf3D7_01_v3	453557	454316	Troph_H3K4_peak_46	120	.	2.44415	13.6887	12.0535	PF3D7_0112100	PIMMS1	PIMMS1 protein
Pf3D7_01_v3	454769	457313	Troph_H3K4_peak_47	53	.	1.93226	6.70296	5.33807	intergenic
Pf3D7_01_v3	460736	461173	Troph_H3K4_peak_48	21	.	1.61314	3.379	2.19076	intergenic
Pf3D7_01_v3	462506	463908	Troph_H3K4_peak_49	43	.	1.85282	5.70085	4.38839	PF3D7_0112200	MRP1	multidrug resistance-associated protein 1
Pf3D7_01_v3	471574	472315	Troph_H3K4_peak_50	36	.	1.70642	4.94841	3.67139	intergenic
Pf3D7_01_v3	483955	484379	Troph_H3K4_peak_51	113	.	2.52944	12.9269	11.3263	PF3D7_0112900		Plasmodium exported protein, unknown function
Pf3D7_01_v3	491009	491431	Troph_H3K4_peak_52	14	.	1.52048	2.52347	1.40447	intergenic
Pf3D7_01_v3	500986	501331	Troph_H3K4_peak_53	45	.	1.85922	5.83205	4.50303	PF3D7_0113200		Plasmodium exported protein, unknown function
Pf3D7_01_v3	501764	502087	Troph_H3K4_peak_54	21	.	1.53532	3.2839	2.10678	intergenic
Pf3D7_01_v3	510769	511039	Troph_H3K4_peak_55	30	.	1.72728	4.29825	3.05851	intergenic
Pf3D7_01_v3	513775	514669	Troph_H3K4_peak_56	405	.	3.50137	42.6126	40.5205	intergenic
Pf3D7_01_v3	523315	533199	Troph_H3K4_peak_57	115	.	2.35281	13.1445	11.5408	intergenic
Pf3D7_01_v3	533722	535936	Troph_H3K4_peak_58	36	.	1.76299	4.95774	3.67954	intergenic
Pf3D7_01_v3	537263	537591	Troph_H3K4_peak_59	11	.	1.44701	2.27027	1.178	PF3D7_0113900	CBP1	CX3CL1-binding protein 1
Pf3D7_01_v3	540728	541045	Troph_H3K4_peak_60	49	.	1.93795	6.32727	4.99029	PF3D7_0114000	EPF1	exported protein family 1
Pf3D7_01_v3	541845	542312	Troph_H3K4_peak_61	219	.	3.20356	23.8316	21.9167	PF3D7_0114000	EPF1	exported protein family 1
Pf3D7_01_v3	545832	546196	Troph_H3K4_peak_62	46	.	1.9324	5.94782	4.6104	intergenic
Pf3D7_01_v3	550485	552108	Troph_H3K4_peak_63	92	.	2.29435	10.7108	9.22307	PF3D7_0114200	EPF3	exported protein family 3
Pf3D7_01_v3	552719	556013	Troph_H3K4_peak_64	117	.	2.42839	13.337	11.7477	intergenic
Pf3D7_01_v3	556528	556800	Troph_H3K4_peak_65	31	.	1.7729	4.39945	3.14936	intergenic
Pf3D7_01_v3	557215	558526	Troph_H3K4_peak_66	27	.	1.69564	3.91291	2.70322	PF3D7_0114500		Plasmodium exported protein (hyp10), unknown function
Pf3D7_01_v3	559088	561361	Troph_H3K4_peak_67	38	.	1.77834	5.13458	3.85038	intergenic
Pf3D7_01_v3	561778	562303	Troph_H3K4_peak_68	43	.	1.89743	5.67539	4.37006	intergenic
Pf3D7_01_v3	562792	563159	Troph_H3K4_peak_69	36	.	1.82127	4.91409	3.63533	PF3D7_0114700	RIF	rifin
Pf3D7_01_v3	563616	565459	Troph_H3K4_peak_70	85	.	2.19972	10.0142	8.511	PF3D7_0114700	RIF	rifin
Pf3D7_01_v3	566094	567944	Troph_H3K4_peak_71	58	.	1.9743	7.24874	5.8589	PF3D7_0114750		Plasmodium exported protein, unknown function, fragment
Pf3D7_01_v3	568746	570819	Troph_H3K4_peak_72	60	.	2.06993	7.43597	6.04616	PF3D7_0114800		Plasmodium exported protein (hyp7), unknown function
Pf3D7_01_v3	571326	571676	Troph_H3K4_peak_73	27	.	1.72013	3.97899	2.75255	intergenic
Pf3D7_01_v3	572151	572858	Troph_H3K4_peak_74	19	.	1.60451	3.08989	1.92339	intergenic
Pf3D7_01_v3	592237	594207	Troph_H3K4_peak_75	82	.	2.13487	9.68995	8.22519	intergenic
Pf3D7_01_v3	595527	596279	Troph_H3K4_peak_76	341	.	3.73084	36.3492	34.123	PF3D7_0115300	RIF	rifin
Pf3D7_01_v3	596800	598019	Troph_H3K4_peak_77	34	.	1.78967	4.74663	3.4908	intergenic
Pf3D7_01_v3	598921	599491	Troph_H3K4_peak_78	143	.	2.60707	16.0688	14.3527	PF3D7_0115400		stevor
Pf3D7_01_v3	604834	605492	Troph_H3K4_peak_79	63	.	2.05185	7.78992	6.36473	intergenic
Pf3D7_01_v3	609702	615126	Troph_H3K4_peak_80	158	.	2.57431	17.6041	15.8692	intergenic
Pf3D7_01_v3	615732	616251	Troph_H3K4_peak_81	911	.	6.42223	94.0299	91.1641	intergenic
Pf3D7_01_v3	616641	617847	Troph_H3K4_peak_82	640	.	4.89697	66.4689	64.0556	intergenic
Pf3D7_01_v3	639707	640451	Troph_H3K4_peak_83	31	.	1.75105	4.3525	3.11533	intergenic
Pf3D7_02_v3	123597	123851	Troph_H3K4_peak_84	13	.	1.48739	2.45829	1.34579	intergenic
Pf3D7_02_v3	126762	127448	Troph_H3K4_peak_85	47	.	1.80518	6.03942	4.72302	PF3D7_0202500	ETRAMP2	early transcribed membrane protein 2
Pf3D7_02_v3	164167	164659	Troph_H3K4_peak_86	21	.	1.61442	3.38019	2.19255	intergenic
Pf3D7_02_v3	226809	227117	Troph_H3K4_peak_87	24	.	1.66231	3.68183	2.47578	PF3D7_0205600		conserved Plasmodium protein, unknown function
Pf3D7_02_v3	233105	233472	Troph_H3K4_peak_88	16	.	1.52642	2.74172	1.60305	PF3D7_0205800	PH1	PH domain-containing protein, putative
Pf3D7_02_v3	251528	251842	Troph_H3K4_peak_89	183	.	3.01084	20.1886	18.3476	intergenic
Pf3D7_02_v3	257096	257681	Troph_H3K4_peak_90	65	.	2.00499	7.97121	6.53912	intergenic
Pf3D7_02_v3	268760	269219	Troph_H3K4_peak_91	77	.	2.24603	9.25487	7.77749	PF3D7_0206600		DNA-directed RNA polymerase III subunit RPC10, putative
Pf3D7_02_v3	273831	275335	Troph_H3K4_peak_92	139	.	2.37763	15.6437	13.9891	PF3D7_0206900	MSP5	merozoite surface protein 5
Pf3D7_02_v3	279580	279918	Troph_H3K4_peak_93	23	.	1.61263	3.59462	2.39265	intergenic
Pf3D7_02_v3	288288	288633	Troph_H3K4_peak_94	47	.	1.8532	6.09925	4.75581	intergenic
Pf3D7_02_v3	293406	294479	Troph_H3K4_peak_95	46	.	1.85397	6.01718	4.69983	PF3D7_0207400	SERA7	serine repeat antigen 7
Pf3D7_02_v3	297861	298105	Troph_H3K4_peak_96	63	.	2.04885	7.78278	6.36472	PF3D7_0207500	SERA6	serine repeat antigen 6
Pf3D7_02_v3	307444	308082	Troph_H3K4_peak_97	30	.	1.73096	4.27701	3.03528	PF3D7_0207700	SERA4	serine repeat antigen 4
Pf3D7_02_v3	311725	311964	Troph_H3K4_peak_98	22	.	1.54697	3.49442	2.29606	intergenic
Pf3D7_02_v3	312676	313003	Troph_H3K4_peak_99	87	.	2.26357	10.2946	8.78465	PF3D7_0207800	SERA3	serine repeat antigen 3
Pf3D7_02_v3	316246	316499	Troph_H3K4_peak_100	24	.	1.57878	3.66067	2.45437	intergenic
Pf3D7_02_v3	320741	321040	Troph_H3K4_peak_101	33	.	1.62052	4.60359	3.3385	intergenic
Pf3D7_02_v3	321688	322063	Troph_H3K4_peak_102	207	.	3.19827	22.6209	20.7135	PF3D7_0208000	SERA1	serine repeat antigen 1
Pf3D7_02_v3	324379	324679	Troph_H3K4_peak_103	16	.	1.50405	2.84275	1.69675	intergenic
Pf3D7_02_v3	346542	346926	Troph_H3K4_peak_104	19	.	1.58022	3.15533	1.98326	intergenic
Pf3D7_02_v3	351681	351985	Troph_H3K4_peak_105	29	.	1.71892	4.15951	2.91664	PF3D7_0208500	ACP	acyl carrier protein
Pf3D7_02_v3	356052	357836	Troph_H3K4_peak_106	103	.	2.38374	11.8724	10.3395	PF3D7_0208700		SHS2 domain-containing protein, putative
Pf3D7_02_v3	384819	385250	Troph_H3K4_peak_107	46	.	1.8696	6.0057	4.66998	PF3D7_0209200	MTR3	exosome complex component MTR3, putative
Pf3D7_02_v3	387655	387971	Troph_H3K4_peak_108	19	.	1.56016	3.169	1.99473	PF3D7_0209300	IspF	2C-methyl-D-erythritol 2,4-cyclodiphosphate synthase	PF3D7_0209400		ARMT1-like domain-containing protein, putative
Pf3D7_02_v3	398563	399573	Troph_H3K4_peak_109	26	.	1.65507	3.88689	2.67108	intergenic
Pf3D7_02_v3	403036	403433	Troph_H3K4_peak_110	33	.	1.69229	4.59829	3.33217	PF3D7_0209800	UAP56	ATP-dependent RNA helicase UAP56
Pf3D7_02_v3	410211	410816	Troph_H3K4_peak_111	31	.	1.71536	4.35408	3.10203	PF3D7_0210000	Sec61-gamma	secretory complex protein 61 gamma subunit	PF3D7_0210100	RPL37A	60S ribosomal protein L37ae, putative
Pf3D7_02_v3	423135	423399	Troph_H3K4_peak_112	31	.	1.67328	4.43656	3.18309	PF3D7_0210300		monocarboxylate transporter, putative
Pf3D7_02_v3	440250	440552	Troph_H3K4_peak_113	43	.	1.89264	5.65254	4.3331	PF3D7_0210900		conserved Plasmodium protein, unknown function
Pf3D7_02_v3	442265	442562	Troph_H3K4_peak_114	19	.	1.51072	3.10859	1.9395	intergenic
Pf3D7_02_v3	445423	446773	Troph_H3K4_peak_115	26	.	1.61602	3.92041	2.699	intergenic
Pf3D7_02_v3	451771	452162	Troph_H3K4_peak_116	19	.	1.52944	3.11458	1.94698	PF3D7_0211100		conserved Plasmodium protein, unknown function
Pf3D7_02_v3	453622	455026	Troph_H3K4_peak_117	20	.	1.55229	3.1859	2.01225	PF3D7_0211200	RAB5a	ras-related protein Rab-5A
Pf3D7_02_v3	521959	522568	Troph_H3K4_peak_118	45	.	1.87526	5.84621	4.53842	PF3D7_0212600	SPATR	secreted protein with altered thrombospondin repeat domain
Pf3D7_02_v3	523466	523817	Troph_H3K4_peak_119	20	.	1.50309	3.19437	2.02054	PF3D7_0212700		SRR1-like protein
Pf3D7_02_v3	526476	526830	Troph_H3K4_peak_120	67	.	2.13128	8.15808	6.73056	PF3D7_0212800	MATE	multidrug efflux pump, putative
Pf3D7_02_v3	528868	529689	Troph_H3K4_peak_121	306	.	3.10604	32.7104	30.6356	intergenic
Pf3D7_02_v3	533493	533747	Troph_H3K4_peak_122	13	.	1.44103	2.41384	1.30594	intergenic
Pf3D7_02_v3	568769	570133	Troph_H3K4_peak_123	65	.	1.92572	7.9788	6.56293	intergenic
Pf3D7_02_v3	576996	577261	Troph_H3K4_peak_124	43	.	1.92246	5.69776	4.37586	PF3D7_0214300		conserved Plasmodium protein, unknown function
Pf3D7_02_v3	578180	578814	Troph_H3K4_peak_125	127	.	2.59325	14.3732	12.7468	intergenic
Pf3D7_02_v3	601965	602739	Troph_H3K4_peak_126	58	.	2.0078	7.26917	5.89901	PF3D7_0214800		conserved Plasmodium membrane protein, unknown function
Pf3D7_02_v3	615191	615488	Troph_H3K4_peak_127	103	.	2.35492	11.8759	10.3001	PF3D7_0215000	ACS9	acyl-CoA synthetase
Pf3D7_02_v3	618836	619063	Troph_H3K4_peak_128	22	.	1.6158	3.48742	2.28864	intergenic
Pf3D7_02_v3	622761	623069	Troph_H3K4_peak_129	30	.	1.72542	4.25603	3.01096	PF3D7_0215100		RING zinc finger protein, putative
Pf3D7_02_v3	625346	625651	Troph_H3K4_peak_130	21	.	1.60663	3.31152	2.13406	PF3D7_0215200		conserved Plasmodium protein, unknown function
Pf3D7_02_v3	627002	627255	Troph_H3K4_peak_131	34	.	1.77444	4.7114	3.43746	PF3D7_0215300	ACS8	acyl-CoA synthetase
Pf3D7_02_v3	632795	633265	Troph_H3K4_peak_132	201	.	2.94714	22.0346	20.1732	intergenic
Pf3D7_02_v3	649405	649754	Troph_H3K4_peak_133	14	.	1.4507	2.62006	1.49351	PF3D7_0215800	ORC5	origin recognition complex subunit 5
Pf3D7_02_v3	677340	677567	Troph_H3K4_peak_134	28	.	1.64041	4.05224	2.81779	PF3D7_0216500		conserved Plasmodium protein, unknown function
Pf3D7_02_v3	689360	689868	Troph_H3K4_peak_135	72	.	2.14504	8.7042	7.26058	PF3D7_0216700	ATG11	autophagy-related protein 11, putative
Pf3D7_02_v3	700116	700556	Troph_H3K4_peak_136	46	.	1.93995	5.95553	4.62448	PF3D7_0216900		conserved Plasmodium protein, unknown function
Pf3D7_02_v3	701825	702091	Troph_H3K4_peak_137	15	.	1.5167	2.69368	1.56148	PF3D7_0216900		conserved Plasmodium protein, unknown function
Pf3D7_02_v3	716312	716565	Troph_H3K4_peak_138	24	.	1.68667	3.63018	2.42102	PF3D7_0217300	AP2S	AP-2 complex subunit sigma, putative	PF3D7_0217400		conserved protein, unknown function
Pf3D7_02_v3	736273	736799	Troph_H3K4_peak_139	14	.	1.43238	2.59961	1.47463	intergenic
Pf3D7_02_v3	737753	738180	Troph_H3K4_peak_140	94	.	2.3826	10.9616	9.42172	PF3D7_0218000	RFC2	replication factor C subunit 2, putative
Pf3D7_02_v3	748269	748660	Troph_H3K4_peak_141	126	.	2.52527	14.3499	12.6913	intergenic
Pf3D7_02_v3	752899	753210	Troph_H3K4_peak_142	53	.	1.98569	6.69525	5.3284	PF3D7_0218500	SNRPD2	small nuclear ribonucleoprotein Sm D2, putative
Pf3D7_02_v3	769915	770165	Troph_H3K4_peak_143	23	.	1.58508	3.5441	2.34128	PF3D7_0219100		saccharopine dehydrogenase, putative
Pf3D7_02_v3	775494	775827	Troph_H3K4_peak_144	31	.	1.67579	4.42436	3.17316	PF3D7_0219500		pseudouridine synthase, putative
Pf3D7_02_v3	779291	779584	Troph_H3K4_peak_145	52	.	1.85419	6.63089	5.26508	PF3D7_0219600	RFC1	replication factor C subunit 1
Pf3D7_02_v3	784159	784538	Troph_H3K4_peak_146	35	.	1.69037	4.85677	3.58066	intergenic
Pf3D7_02_v3	785876	786129	Troph_H3K4_peak_147	40	.	1.872	5.32631	4.02005	PF3D7_0219800		Plasmodium exported protein (PHISTc), unknown function
Pf3D7_02_v3	787702	788486	Troph_H3K4_peak_148	75	.	2.11846	9.00203	7.53069	intergenic
Pf3D7_02_v3	789526	789983	Troph_H3K4_peak_149	84	.	2.18209	9.92819	8.43248	PF3D7_0219900		Plasmodium exported protein, unknown function
Pf3D7_02_v3	793847	794955	Troph_H3K4_peak_150	86	.	2.1817	10.1201	8.65132	PF3D7_0220000	LSA3	liver stage antigen 3
Pf3D7_02_v3	797314	797699	Troph_H3K4_peak_151	19	.	1.54064	3.14166	1.97193	intergenic
Pf3D7_02_v3	799993	800248	Troph_H3K4_peak_152	18	.	1.51099	2.96167	1.80492	intergenic
Pf3D7_02_v3	808186	808511	Troph_H3K4_peak_153	18	.	1.55623	3.0153	1.8552	PF3D7_0220200		Plasmodium exported protein, unknown function
Pf3D7_02_v3	809233	810595	Troph_H3K4_peak_154	111	.	2.2696	12.739	11.1592	PF3D7_0220200		Plasmodium exported protein, unknown function
Pf3D7_02_v3	811284	811600	Troph_H3K4_peak_155	47	.	1.95429	6.06313	4.71948	intergenic
Pf3D7_02_v3	813916	814388	Troph_H3K4_peak_156	31	.	1.67801	4.36816	3.1143	intergenic
Pf3D7_02_v3	815507	816390	Troph_H3K4_peak_157	222	.	3.14744	24.0879	22.2473	intergenic
Pf3D7_02_v3	831592	831917	Troph_H3K4_peak_158	13	.	1.43783	2.50519	1.38886	intergenic
Pf3D7_02_v3	832814	833055	Troph_H3K4_peak_159	19	.	1.59091	3.12934	1.95913	PF3D7_0220700		Plasmodium exported protein (hyp9), unknown function
Pf3D7_02_v3	838070	838855	Troph_H3K4_peak_160	21	.	1.59024	3.38154	2.19406	PF3D7_0220800	CLAG2	cytoadherence linked asexual protein 2
Pf3D7_02_v3	842738	844106	Troph_H3K4_peak_161	25	.	1.59539	3.75133	2.5428	intergenic
Pf3D7_02_v3	844766	851667	Troph_H3K4_peak_162	73	.	2.09408	8.7683	7.33212	PF3D7_0221000		Plasmodium exported protein, unknown function
Pf3D7_02_v3	855537	855811	Troph_H3K4_peak_163	26	.	1.62975	3.86928	2.64398	intergenic
Pf3D7_02_v3	856522	858521	Troph_H3K4_peak_164	75	.	2.06537	9.01827	7.59056	intergenic
Pf3D7_02_v3	858935	863773	Troph_H3K4_peak_165	82	.	2.16859	9.71803	8.25651	PF3D7_0221400		stevor
Pf3D7_02_v3	864802	867038	Troph_H3K4_peak_166	38	.	1.81395	5.07594	3.80544	intergenic
Pf3D7_02_v3	870560	870851	Troph_H3K4_peak_167	11	.	1.41582	2.20074	1.11454	intergenic
Pf3D7_02_v3	873858	874268	Troph_H3K4_peak_168	35	.	1.80227	4.77905	3.50282	intergenic
Pf3D7_02_v3	889864	890741	Troph_H3K4_peak_169	124	.	2.5064	14.063	12.4148	PF3D7_0222500	RIF	rifin
Pf3D7_02_v3	893141	894228	Troph_H3K4_peak_170	157	.	2.60669	17.4981	15.7617	PF3D7_0222600	RIF	rifin
Pf3D7_02_v3	896483	897375	Troph_H3K4_peak_171	101	.	2.34364	11.664	10.108	PF3D7_0222700	RIF	rifin
Pf3D7_02_v3	899961	900409	Troph_H3K4_peak_172	118	.	2.52048	13.4874	11.8648	PF3D7_0222800		stevor
Pf3D7_02_v3	904956	905751	Troph_H3K4_peak_173	90	.	2.25229	10.5578	9.03024	PF3D7_0223100	RIF	rifin
Pf3D7_02_v3	908087	908803	Troph_H3K4_peak_174	290	.	3.48855	31.2023	29.0828	PF3D7_0223200	RIF	rifin	PF3D7_0223300		erythrocyte membrane protein 1 (PfEMP1), exon 2
Pf3D7_02_v3	909871	910241	Troph_H3K4_peak_175	26	.	1.70425	3.83442	2.61724	PF3D7_0223300		erythrocyte membrane protein 1 (PfEMP1), exon 2
Pf3D7_02_v3	913936	914428	Troph_H3K4_peak_176	98	.	2.34648	11.4149	9.85783	PF3D7_0223400	RIF	rifin
Pf3D7_02_v3	918289	923838	Troph_H3K4_peak_177	196	.	2.90333	21.5216	19.658	intergenic
Pf3D7_02_v3	925277	925513	Troph_H3K4_peak_178	95	.	2.42303	11.1501	9.5967	intergenic
Pf3D7_02_v3	925990	926385	Troph_H3K4_peak_179	198	.	3.10952	21.6884	19.8366	intergenic
Pf3D7_02_v3	929261	929632	Troph_H3K4_peak_180	15	.	1.53663	2.68157	1.54874	intergenic
Pf3D7_02_v3	930388	931328	Troph_H3K4_peak_181	14	.	1.53239	2.58964	1.46455	intergenic
Pf3D7_02_v3	933883	934814	Troph_H3K4_peak_182	20	.	1.62553	3.2434	2.06887	intergenic
Pf3D7_02_v3	935749	938906	Troph_H3K4_peak_183	572	.	4.55345	59.6818	57.2941	intergenic
Pf3D7_03_v3	10610	12624	Troph_H3K4_peak_184	470	.	4.34326	49.2377	47.0047	intergenic
Pf3D7_03_v3	13627	14150	Troph_H3K4_peak_185	129	.	2.67724	14.6317	12.9628	intergenic
Pf3D7_03_v3	34281	35296	Troph_H3K4_peak_186	604	.	4.96268	62.8915	60.4819	intergenic
Pf3D7_03_v3	35771	36084	Troph_H3K4_peak_187	222	.	3.28331	24.1393	22.2094	intergenic
Pf3D7_03_v3	36780	41277	Troph_H3K4_peak_188	152	.	2.57947	16.9877	15.2413	intergenic
Pf3D7_03_v3	41906	42208	Troph_H3K4_peak_189	10	.	1.44898	2.09415	1.02044	intergenic
Pf3D7_03_v3	46510	46844	Troph_H3K4_peak_190	15	.	1.52442	2.69192	1.56071	PF3D7_0300200	RIF	rifin
Pf3D7_03_v3	52288	52753	Troph_H3K4_peak_191	209	.	3.10351	22.886	20.9729	PF3D7_0300400		stevor
Pf3D7_03_v3	55411	55765	Troph_H3K4_peak_192	135	.	2.72192	15.2765	13.5879	PF3D7_0300500	RIF	rifin
Pf3D7_03_v3	61454	62686	Troph_H3K4_peak_193	68	.	2.05805	8.25235	6.82129	PF3D7_0300700	RIF	rifin
Pf3D7_03_v3	65364	66426	Troph_H3K4_peak_194	44	.	1.92049	5.76298	4.4424	intergenic
Pf3D7_03_v3	66859	75263	Troph_H3K4_peak_195	77	.	2.12015	9.18214	7.73635	intergenic
Pf3D7_03_v3	75696	77785	Troph_H3K4_peak_196	79	.	2.1406	9.43078	7.97389	PF3D7_0301100		Plasmodium exported protein (hyp13), unknown function
Pf3D7_03_v3	78511	78977	Troph_H3K4_peak_197	22	.	1.58179	3.40561	2.21758	PF3D7_0301200	FIKK3	serine/threonine protein kinase, FIKK family
Pf3D7_03_v3	79782	80117	Troph_H3K4_peak_198	35	.	1.74748	4.81239	3.53671	intergenic
Pf3D7_03_v3	85461	85794	Troph_H3K4_peak_199	16	.	1.52323	2.77904	1.63705	PF3D7_0301400		Plasmodium exported protein, unknown function
Pf3D7_03_v3	86702	86990	Troph_H3K4_peak_200	38	.	1.84287	5.12102	3.83277	PF3D7_0301500		Plasmodium exported protein, unknown function
Pf3D7_03_v3	96049	96300	Troph_H3K4_peak_201	44	.	1.89519	5.78377	4.45892	PF3D7_0301700		Plasmodium exported protein, unknown function
Pf3D7_03_v3	96892	97252	Troph_H3K4_peak_202	46	.	1.83558	5.99149	4.6548	intergenic
Pf3D7_03_v3	99811	100540	Troph_H3K4_peak_203	76	.	2.19849	9.13115	7.66156	intergenic
Pf3D7_03_v3	101029	102973	Troph_H3K4_peak_204	293	.	3.12033	31.2221	29.3989	intergenic
Pf3D7_03_v3	115220	119687	Troph_H3K4_peak_205	221	.	2.77924	23.9742	22.1934	intergenic
Pf3D7_03_v3	120914	121347	Troph_H3K4_peak_206	168	.	2.92726	18.5953	16.8036	intergenic
Pf3D7_03_v3	123749	124058	Troph_H3K4_peak_207	76	.	2.24166	9.1234	7.65444	intergenic
Pf3D7_03_v3	124602	135276	Troph_H3K4_peak_208	89	.	2.19399	10.4395	8.92512	intergenic
Pf3D7_03_v3	148100	148507	Troph_H3K4_peak_209	51	.	1.83672	6.49876	5.14521	PF3D7_0302800		RNA-binding protein, putative
Pf3D7_03_v3	149853	150105	Troph_H3K4_peak_210	23	.	1.62384	3.52252	2.32592	intergenic
Pf3D7_03_v3	197653	197949	Troph_H3K4_peak_211	45	.	1.89869	5.8885	4.55781	PF3D7_0304000	IMC1a	inner membrane complex protein 1a, putative
Pf3D7_03_v3	202615	203816	Troph_H3K4_peak_212	95	.	2.29821	11.1099	9.5834	PF3D7_0304100	IMC1e	inner membrane complex protein 1e, putative
Pf3D7_03_v3	222805	223477	Troph_H3K4_peak_213	159	.	2.85485	17.7257	15.9715	intergenic
Pf3D7_03_v3	231431	232264	Troph_H3K4_peak_214	31	.	1.71954	4.39246	3.14599	PF3D7_0304900		conserved protein, unknown function
Pf3D7_03_v3	238606	239084	Troph_H3K4_peak_215	63	.	2.0252	7.76096	6.34703	intergenic
Pf3D7_03_v3	291814	292156	Troph_H3K4_peak_216	25	.	1.65775	3.78867	2.57166	PF3D7_0306200	AHA1	activator of Hsp90 ATPase
Pf3D7_03_v3	309144	309483	Troph_H3K4_peak_217	87	.	2.3209	10.2855	8.76886	PF3D7_0306900		40S ribosomal protein S23, putative
Pf3D7_03_v3	316924	317481	Troph_H3K4_peak_218	16	.	1.54746	2.7669	1.62815	intergenic
Pf3D7_03_v3	318817	319513	Troph_H3K4_peak_219	19	.	1.56861	3.10346	1.93929	PF3D7_0307300	EB1	microtubule-associated protein RP/EB family, putative
Pf3D7_03_v3	339098	339512	Troph_H3K4_peak_220	136	.	2.53259	15.3215	13.6375	PF3D7_0307900		conserved Plasmodium protein, unknown function
Pf3D7_03_v3	347341	347596	Troph_H3K4_peak_221	30	.	1.73057	4.24783	3.00059	intergenic
Pf3D7_03_v3	348152	348383	Troph_H3K4_peak_222	51	.	1.9407	6.47206	5.11546	intergenic
Pf3D7_03_v3	367029	369642	Troph_H3K4_peak_223	83	.	2.07714	9.76739	8.32088	intergenic
Pf3D7_03_v3	375212	375691	Troph_H3K4_peak_224	16	.	1.53297	2.80712	1.66304	PF3D7_0308700		conserved protein, unknown function
Pf3D7_03_v3	388080	388452	Troph_H3K4_peak_225	23	.	1.66121	3.52287	2.33056	PF3D7_0309200	ARK2	serine/threonine protein kinase ARK2, putative
Pf3D7_03_v3	396430	397003	Troph_H3K4_peak_226	83	.	2.24592	9.80339	8.3031	PF3D7_0309300		N2227-like protein, putative
Pf3D7_03_v3	402875	403201	Troph_H3K4_peak_227	50	.	1.96058	6.39945	5.04355	intergenic
Pf3D7_03_v3	405157	405458	Troph_H3K4_peak_228	15	.	1.42313	2.63493	1.50783	intergenic
Pf3D7_03_v3	407967	408244	Troph_H3K4_peak_229	27	.	1.62331	4.00754	2.77699	PF3D7_0309700	SBP2	SECIS-binding protein 2, putative
Pf3D7_03_v3	409793	410047	Troph_H3K4_peak_230	20	.	1.53051	3.21531	2.03675	PF3D7_0309700	SBP2	SECIS-binding protein 2, putative
Pf3D7_03_v3	410696	411664	Troph_H3K4_peak_231	21	.	1.62387	3.3785	2.19151	PF3D7_0309800	YTH2	YTH domain-containing protein 2
Pf3D7_03_v3	422908	423216	Troph_H3K4_peak_232	11	.	1.38685	2.19035	1.10616	PF3D7_0310100	CDPK3	calcium-dependent protein kinase 3
Pf3D7_03_v3	434279	435545	Troph_H3K4_peak_233	81	.	2.20172	9.63353	8.15283	intergenic
Pf3D7_03_v3	439863	440146	Troph_H3K4_peak_234	58	.	2.04931	7.22364	5.82838	intergenic
Pf3D7_03_v3	478787	479015	Troph_H3K4_peak_235	13	.	1.45599	2.42945	1.32055	PF3D7_0311300		phosphatidylinositol 3- and 4-kinase, putative
Pf3D7_03_v3	481868	482133	Troph_H3K4_peak_236	15	.	1.44562	2.65331	1.52364	intergenic
Pf3D7_03_v3	487190	487611	Troph_H3K4_peak_237	38	.	1.8512	5.11836	3.83345	PF3D7_0311400	PKRP	kinase-related protein PKRP, putative
Pf3D7_03_v3	488486	489067	Troph_H3K4_peak_238	60	.	2.04428	7.43573	6.03654	PF3D7_0311400	PKRP	kinase-related protein PKRP, putative
Pf3D7_03_v3	491783	492432	Troph_H3K4_peak_239	40	.	1.79294	5.33935	4.03892	intergenic
Pf3D7_03_v3	492915	493381	Troph_H3K4_peak_240	42	.	1.79832	5.54679	4.23025	intergenic
Pf3D7_03_v3	497160	497399	Troph_H3K4_peak_241	34	.	1.74604	4.77665	3.4999	PF3D7_0311500		conserved protein, unknown function
Pf3D7_03_v3	519014	519505	Troph_H3K4_peak_242	155	.	2.41613	17.2315	15.5028	intergenic
Pf3D7_03_v3	524190	524477	Troph_H3K4_peak_243	46	.	1.87272	5.95865	4.62987	intergenic
Pf3D7_03_v3	531108	532091	Troph_H3K4_peak_244	122	.	2.35959	13.9095	12.2819	intergenic
Pf3D7_03_v3	547669	548115	Troph_H3K4_peak_245	60	.	2.02841	7.47561	6.07253	PF3D7_0313500	PfG	Ras-like G protein
Pf3D7_03_v3	565957	566184	Troph_H3K4_peak_246	27	.	1.70077	3.94868	2.72412	PF3D7_0314000		HSP20-like chaperone, putative
Pf3D7_03_v3	570463	570800	Troph_H3K4_peak_247	32	.	1.7401	4.49947	3.23801	intergenic
Pf3D7_03_v3	582054	582472	Troph_H3K4_peak_248	31	.	1.77681	4.45267	3.19201	PF3D7_0314500		conserved Plasmodium protein, unknown function
Pf3D7_03_v3	587704	588084	Troph_H3K4_peak_249	71	.	2.08806	8.55974	7.1273	PF3D7_0314700	RNF1	RING finger protein RNF1
Pf3D7_03_v3	591896	592167	Troph_H3K4_peak_250	20	.	1.54266	3.23749	2.05626	intergenic
Pf3D7_03_v3	593625	594537	Troph_H3K4_peak_251	50	.	1.97227	6.39222	5.03953	intergenic
Pf3D7_03_v3	597029	597718	Troph_H3K4_peak_252	24	.	1.64054	3.63957	2.43516	intergenic
Pf3D7_03_v3	600660	601444	Troph_H3K4_peak_253	17	.	1.51674	2.8598	1.71237	intergenic
Pf3D7_03_v3	603735	605920	Troph_H3K4_peak_254	66	.	2.01616	8.05658	6.6553	PF3D7_0314800		conserved Plasmodium protein, unknown function
Pf3D7_03_v3	611530	611977	Troph_H3K4_peak_255	56	.	2.00303	7.02352	5.63863	PF3D7_0315000		zinc finger protein, putative	PF3D7_0315100	eIF4E	eukaryotic translation initiation factor 4E
Pf3D7_03_v3	614461	615312	Troph_H3K4_peak_256	85	.	2.24516	10.039	8.53063	intergenic
Pf3D7_03_v3	639855	640320	Troph_H3K4_peak_257	18	.	1.4869	3.01748	1.85684	intergenic
Pf3D7_03_v3	644319	644958	Troph_H3K4_peak_258	18	.	1.5182	2.97063	1.81482	PF3D7_0315900		conserved Plasmodium protein, unknown function	PF3D7_0316000	MA	microneme associated antigen
Pf3D7_03_v3	672661	673094	Troph_H3K4_peak_259	57	.	2.04229	7.10959	5.72924	PF3D7_0316700	YOP1	protein YOP1, putative
Pf3D7_03_v3	685603	686052	Troph_H3K4_peak_260	71	.	2.1288	8.63581	7.18738	PF3D7_0317100	B9	6-cysteine protein
Pf3D7_03_v3	697675	698940	Troph_H3K4_peak_261	94	.	2.26736	10.9827	9.47379	PF3D7_0317300		conserved Plasmodium protein, unknown function
Pf3D7_03_v3	716009	717129	Troph_H3K4_peak_262	68	.	2.05959	8.3265	6.89819	PF3D7_0317500	EG5	kinesin-5
Pf3D7_03_v3	719986	720234	Troph_H3K4_peak_263	19	.	1.52554	3.15646	1.98439	intergenic
Pf3D7_03_v3	723347	724021	Troph_H3K4_peak_264	104	.	2.47993	12.0289	10.4502	PF3D7_0317600	RPS11	40S ribosomal protein S11, putative
Pf3D7_03_v3	757037	757627	Troph_H3K4_peak_265	22	.	1.63055	3.44645	2.2536	intergenic
Pf3D7_03_v3	766767	767143	Troph_H3K4_peak_266	59	.	2.01604	7.39812	5.99922	PF3D7_0318500		conserved Plasmodium protein, unknown function
Pf3D7_03_v3	782416	783314	Troph_H3K4_peak_267	28	.	1.66702	4.09698	2.86287	PF3D7_0318600		cleavage and polyadenylation specificity factor, putative
Pf3D7_03_v3	818764	819172	Troph_H3K4_peak_268	56	.	1.93408	7.03836	5.66006	intergenic
Pf3D7_03_v3	819710	820076	Troph_H3K4_peak_269	151	.	2.73143	16.8493	15.1084	PF3D7_0319700	ABCI3	ABC transporter I family member 1, putative
Pf3D7_03_v3	832867	833147	Troph_H3K4_peak_270	42	.	1.89717	5.57034	4.25621	PF3D7_0319900		conserved protein, unknown function
Pf3D7_03_v3	868322	868695	Troph_H3K4_peak_271	64	.	2.01157	7.86841	6.45879	PF3D7_0320800	DOZI	ATP-dependent RNA helicase DDX6
Pf3D7_03_v3	870868	871129	Troph_H3K4_peak_272	41	.	1.50057	5.42698	4.12542	intergenic
Pf3D7_03_v3	871596	872271	Troph_H3K4_peak_273	34	.	1.41811	4.78025	3.49927	intergenic
Pf3D7_03_v3	873956	874242	Troph_H3K4_peak_274	60	.	2.03348	7.4495	6.04709	PF3D7_0320900	H2A.Z	histone H2A.Z
Pf3D7_03_v3	882537	882772	Troph_H3K4_peak_275	18	.	1.5082	2.99612	1.83823	intergenic
Pf3D7_03_v3	885737	886393	Troph_H3K4_peak_276	24	.	1.66366	3.62821	2.42674	PF3D7_0321200	ALG7	UDP-N-acetylglucosamine--dolichyl-phosphate N-acetylglucosaminephosphotransferase, putative
Pf3D7_03_v3	910916	911250	Troph_H3K4_peak_277	31	.	1.76136	4.45201	3.19688	PF3D7_0321800		WD repeat-containing protein, putative
Pf3D7_03_v3	931436	931861	Troph_H3K4_peak_278	39	.	1.74001	5.24728	3.95132	intergenic
Pf3D7_03_v3	983277	983779	Troph_H3K4_peak_279	78	.	2.02683	9.27913	7.80427	intergenic
Pf3D7_03_v3	984172	984401	Troph_H3K4_peak_280	38	.	1.82345	5.19755	3.89555	intergenic
Pf3D7_03_v3	1015916	1017733	Troph_H3K4_peak_281	155	.	2.71416	17.2932	15.5695	intergenic
Pf3D7_03_v3	1019129	1019987	Troph_H3K4_peak_282	102	.	2.39841	11.7992	10.2232	PF3D7_0324500	RIF	rifin
Pf3D7_03_v3	1022559	1023029	Troph_H3K4_peak_283	201	.	3.08029	22.0602	20.1764	PF3D7_0324600		stevor
Pf3D7_03_v3	1027862	1028891	Troph_H3K4_peak_284	42	.	1.83361	5.58145	4.27765	PF3D7_0324800	RIF	rifin
Pf3D7_03_v3	1034345	1038506	Troph_H3K4_peak_285	174	.	2.70123	19.2103	17.4166	intergenic
Pf3D7_03_v3	1040479	1041545	Troph_H3K4_peak_286	956	.	5.60177	98.536	95.6114	intergenic
Pf3D7_03_v3	1043074	1044455	Troph_H3K4_peak_287	16	.	1.56238	2.7946	1.65278	intergenic
Pf3D7_03_v3	1050725	1051606	Troph_H3K4_peak_288	55	.	1.99448	6.88001	5.5088	intergenic
Pf3D7_03_v3	1052097	1054540	Troph_H3K4_peak_289	336	.	3.62608	35.8289	33.6838	intergenic
Pf3D7_04_v3	8142	8500	Troph_H3K4_peak_290	127	.	2.64597	14.3577	12.7037	intergenic
Pf3D7_04_v3	8957	10363	Troph_H3K4_peak_291	106	.	2.4544	12.2009	10.6355	intergenic
Pf3D7_04_v3	26060	26579	Troph_H3K4_peak_292	500	.	4.64866	52.449	50.0945	intergenic
Pf3D7_04_v3	28481	34042	Troph_H3K4_peak_293	173	.	2.68753	19.1488	17.3826	intergenic
Pf3D7_04_v3	34965	35275	Troph_H3K4_peak_294	17	.	1.52285	2.86595	1.71692	intergenic
Pf3D7_04_v3	47623	57205	Troph_H3K4_peak_295	114	.	2.34154	13.0396	11.426	intergenic
Pf3D7_04_v3	60037	60916	Troph_H3K4_peak_296	151	.	2.67551	16.8475	15.1141	PF3D7_0400500	RIF	rifin
Pf3D7_04_v3	63165	64040	Troph_H3K4_peak_297	126	.	2.57025	14.329	12.66	PF3D7_0400700	RIF	rifin
Pf3D7_04_v3	66540	67424	Troph_H3K4_peak_298	109	.	2.45472	12.5162	10.935	PF3D7_0400800		stevor
Pf3D7_04_v3	69501	70915	Troph_H3K4_peak_299	61	.	2.02593	7.59338	6.18833	PF3D7_0400900	RIF	rifin
Pf3D7_04_v3	71403	72122	Troph_H3K4_peak_300	31	.	1.77	4.37418	3.1247	intergenic
Pf3D7_04_v3	73318	73915	Troph_H3K4_peak_301	252	.	3.31138	27.2499	25.2172	PF3D7_0401000	RIF	rifin
Pf3D7_04_v3	79596	81019	Troph_H3K4_peak_302	158	.	2.78669	17.5832	15.814	intergenic
Pf3D7_04_v3	82425	84268	Troph_H3K4_peak_303	93	.	2.27143	10.8948	9.35775	intergenic
Pf3D7_04_v3	85593	87986	Troph_H3K4_peak_304	131	.	2.51247	14.778	13.1217	intergenic
Pf3D7_04_v3	89077	90102	Troph_H3K4_peak_305	42	.	1.83355	5.57515	4.26193	intergenic
Pf3D7_04_v3	98400	102216	Troph_H3K4_peak_306	109	.	2.27369	12.53	10.9853	intergenic
Pf3D7_04_v3	103753	104020	Troph_H3K4_peak_307	16	.	1.52219	2.80767	1.66543	PF3D7_0401800	PfD80	Plasmodium exported protein (PHISTb), unknown function
Pf3D7_04_v3	109256	113654	Troph_H3K4_peak_308	129	.	2.39069	14.5732	12.9794	intergenic
Pf3D7_04_v3	115028	116139	Troph_H3K4_peak_309	66	.	2.06361	8.03325	6.60475	intergenic
Pf3D7_04_v3	117303	118722	Troph_H3K4_peak_310	23	.	1.67169	3.56581	2.36529	intergenic
Pf3D7_04_v3	119334	124479	Troph_H3K4_peak_311	48	.	1.89816	6.16469	4.84121	intergenic
Pf3D7_04_v3	141815	142050	Troph_H3K4_peak_312	47	.	1.87706	6.0916	4.74644	intergenic
Pf3D7_04_v3	150484	155517	Troph_H3K4_peak_313	66	.	2.07357	8.05569	6.63555	intergenic
Pf3D7_04_v3	155986	157033	Troph_H3K4_peak_314	124	.	2.49015	14.0575	12.4236	intergenic
Pf3D7_04_v3	157493	161274	Troph_H3K4_peak_315	60	.	1.94249	7.47582	6.097	PF3D7_0402600		stevor
Pf3D7_04_v3	161800	171224	Troph_H3K4_peak_316	90	.	2.1717	10.5348	9.01919	intergenic
Pf3D7_04_v3	174630	175022	Troph_H3K4_peak_317	180	.	2.29858	19.8235	18.0201	PF3D7_0403100		regulator of chromosome condensation, putative
Pf3D7_04_v3	215893	216204	Troph_H3K4_peak_318	79	.	2.25102	9.47919	7.99497	intergenic
Pf3D7_04_v3	221258	221510	Troph_H3K4_peak_319	39	.	1.74607	5.2668	3.96807	intergenic
Pf3D7_04_v3	224498	225114	Troph_H3K4_peak_320	70	.	2.10078	8.47923	7.05928	PF3D7_0404100	ApiAP2	AP2 domain transcription factor AP2-SP2, putative
Pf3D7_04_v3	239722	240532	Troph_H3K4_peak_321	104	.	2.4103	11.9992	10.4192	PF3D7_0404500	P52	6-cysteine protein P52
Pf3D7_04_v3	244364	244744	Troph_H3K4_peak_322	288	.	3.6597	30.8826	28.8154	PF3D7_0404600		conserved Plasmodium membrane protein, unknown function
Pf3D7_04_v3	245265	245570	Troph_H3K4_peak_323	36	.	1.82773	4.91737	3.6351	PF3D7_0404600		conserved Plasmodium membrane protein, unknown function
Pf3D7_04_v3	250372	250666	Troph_H3K4_peak_324	35	.	1.70137	4.77502	3.50285	intergenic
Pf3D7_04_v3	257100	257360	Troph_H3K4_peak_325	18	.	1.50299	3.03556	1.87261	intergenic
Pf3D7_04_v3	263760	264772	Troph_H3K4_peak_326	99	.	2.29435	11.5141	9.98198	PF3D7_0404800		sporozoite-specific protein S10, putative
Pf3D7_04_v3	279739	280225	Troph_H3K4_peak_327	26	.	1.61761	3.86339	2.64581	intergenic
Pf3D7_04_v3	282437	283283	Troph_H3K4_peak_328	135	.	2.63701	15.2165	13.5484	PF3D7_0405300	LISP2	liver specific protein 2, putative
Pf3D7_04_v3	285710	286601	Troph_H3K4_peak_329	28	.	1.63065	4.11465	2.8907	intergenic
Pf3D7_04_v3	299601	300072	Troph_H3K4_peak_330	33	.	1.6613	4.64679	3.38357	intergenic
Pf3D7_04_v3	313994	314328	Troph_H3K4_peak_331	105	.	2.3919	12.121	10.5435	PF3D7_0405800		conserved protein, unknown function
Pf3D7_04_v3	319493	319984	Troph_H3K4_peak_332	21	.	1.59487	3.30934	2.12752	PF3D7_0406000		conserved protein, unknown function
Pf3D7_04_v3	323415	324094	Troph_H3K4_peak_333	52	.	1.76829	6.55908	5.20226	PF3D7_0406100		V-type proton ATPase subunit B
Pf3D7_04_v3	329246	329560	Troph_H3K4_peak_334	15	.	1.45768	2.6677	1.53627	PF3D7_0406200	Pfs16	parasitophorous vacuole membrane protein S16
Pf3D7_04_v3	338091	338422	Troph_H3K4_peak_335	130	.	2.67815	14.7272	13.0581	intergenic
Pf3D7_04_v3	355357	355644	Troph_H3K4_peak_336	51	.	1.94299	6.46697	5.11216	intergenic
Pf3D7_04_v3	360550	361074	Troph_H3K4_peak_337	90	.	2.20707	10.5154	9.00279	PF3D7_0407000		conserved Plasmodium protein, unknown function
Pf3D7_04_v3	371780	372356	Troph_H3K4_peak_338	270	.	3.36185	29.0505	27.0651	PF3D7_0407600		conserved Plasmodium protein, unknown function
Pf3D7_04_v3	384765	385139	Troph_H3K4_peak_339	25	.	1.61138	3.76144	2.54695	PF3D7_0407800	CINCH	protein CINCH
Pf3D7_04_v3	413402	413767	Troph_H3K4_peak_340	23	.	1.56692	3.58202	2.37901	PF3D7_0408600	SIAP1	sporozoite invasion-associated protein 1
Pf3D7_04_v3	420621	421672	Troph_H3K4_peak_341	88	.	2.30619	10.3492	8.83662	PF3D7_0408800		conserved Plasmodium protein, unknown function
Pf3D7_04_v3	440068	440309	Troph_H3K4_peak_342	28	.	1.65132	4.08457	2.84446	PF3D7_0409300		methyltransferase, putative
Pf3D7_04_v3	452079	452650	Troph_H3K4_peak_343	41	.	1.76431	5.48179	4.17132	PF3D7_0409600	RPA1	replication protein A1, large subunit
Pf3D7_04_v3	468929	470047	Troph_H3K4_peak_344	155	.	2.46571	17.2284	15.5053	PF3D7_0410300	PPM1	protein phosphatase PPM1, putative
Pf3D7_04_v3	474632	475052	Troph_H3K4_peak_345	63	.	1.96228	7.78235	6.3677	PF3D7_0410400	RRP4	exosome complex component RRP4
Pf3D7_04_v3	477317	477631	Troph_H3K4_peak_346	31	.	1.70622	4.44038	3.17837	intergenic
Pf3D7_04_v3	479342	479999	Troph_H3K4_peak_347	11	.	1.42099	2.28816	1.19323	PF3D7_0410600	ATRP	armadillo-type repeat protein ATRP	PF3D7_0410700	RbgA	ribosome biogenesis GTPase A, putative
Pf3D7_04_v3	488540	488818	Troph_H3K4_peak_348	12	.	1.41909	2.40647	1.29844	intergenic
Pf3D7_04_v3	495963	496677	Troph_H3K4_peak_349	220	.	3.02101	23.8775	22.0634	intergenic
Pf3D7_04_v3	517576	518358	Troph_H3K4_peak_350	169	.	2.52982	18.6931	16.9051	PF3D7_0411700		conserved Plasmodium protein, unknown function
Pf3D7_04_v3	535245	535594	Troph_H3K4_peak_351	19	.	1.59239	3.14606	1.97532	PF3D7_0412000		LITAF-like zinc finger protein, putative
Pf3D7_04_v3	545926	547480	Troph_H3K4_peak_352	99	.	2.22711	11.5477	9.99959	intergenic
Pf3D7_04_v3	548368	553987	Troph_H3K4_peak_353	129	.	2.42007	14.5945	12.9418	intergenic
Pf3D7_04_v3	561359	561933	Troph_H3K4_peak_354	154	.	2.73773	17.1395	15.4125	PF3D7_0412700	VAR	erythrocyte membrane protein 1, PfEMP1
Pf3D7_04_v3	563719	569420	Troph_H3K4_peak_355	129	.	2.42698	14.5908	12.9535	intergenic
Pf3D7_04_v3	582709	582940	Troph_H3K4_peak_356	45	.	1.93323	5.872	4.54685	intergenic
Pf3D7_04_v3	583557	583917	Troph_H3K4_peak_357	42	.	1.91512	5.56529	4.24552	intergenic
Pf3D7_04_v3	584398	584717	Troph_H3K4_peak_358	58	.	2.06694	7.2178	5.83163	intergenic
Pf3D7_04_v3	598578	600041	Troph_H3K4_peak_359	169	.	2.85242	18.6348	16.9	intergenic
Pf3D7_04_v3	603254	610523	Troph_H3K4_peak_360	95	.	2.18331	11.0635	9.5398	intergenic
Pf3D7_04_v3	611009	614200	Troph_H3K4_peak_361	64	.	1.96326	7.88274	6.46764	intergenic
Pf3D7_04_v3	639895	640147	Troph_H3K4_peak_362	17	.	1.5087	2.8487	1.70118	intergenic
Pf3D7_04_v3	641348	641828	Troph_H3K4_peak_363	32	.	1.74501	4.55202	3.2892	intergenic
Pf3D7_04_v3	644877	645156	Troph_H3K4_peak_364	15	.	1.49796	2.66184	1.53062	intergenic
Pf3D7_04_v3	649807	650310	Troph_H3K4_peak_365	22	.	1.64084	3.43451	2.24314	PF3D7_0414300		Rab5-interacting protein, putative
Pf3D7_04_v3	656879	657345	Troph_H3K4_peak_366	41	.	1.87267	5.43484	4.13224	intergenic
Pf3D7_04_v3	657752	657979	Troph_H3K4_peak_367	14	.	1.52301	2.55141	1.42869	PF3D7_0414600	APH	acylated pleckstrin-homology domain-containing protein, putative
Pf3D7_04_v3	685295	685528	Troph_H3K4_peak_368	23	.	1.61702	3.57378	2.37414	PF3D7_0415400		coatomer subunit zeta, putative
Pf3D7_04_v3	688666	689016	Troph_H3K4_peak_369	11	.	1.42343	2.26614	1.17384	PF3D7_0415500	CBP20	nuclear cap-binding protein subunit 2, putative	PF3D7_0415600	GAK	GTP:AMP phosphotransferase
Pf3D7_04_v3	705733	706031	Troph_H3K4_peak_370	81	.	2.26795	9.66015	8.16338	PF3D7_0416100	GATA	glutamyl-tRNA(Gln) amidotransferase subunit A
Pf3D7_04_v3	707442	707672	Troph_H3K4_peak_371	28	.	1.63725	4.13422	2.89309	intergenic
Pf3D7_04_v3	727750	727979	Troph_H3K4_peak_372	19	.	1.53549	3.07867	1.91064	PF3D7_0416700		CDGSH iron-sulfur domain-containing protein, putative
Pf3D7_04_v3	729167	729407	Troph_H3K4_peak_373	35	.	1.83435	4.81652	3.53211	PF3D7_0416800	SAR1	small GTP-binding protein sar1
Pf3D7_04_v3	730629	731184	Troph_H3K4_peak_374	37	.	1.69904	5.03617	3.76313	intergenic
Pf3D7_04_v3	733401	733847	Troph_H3K4_peak_375	28	.	1.6549	4.06754	2.83264	intergenic
Pf3D7_04_v3	741106	741554	Troph_H3K4_peak_376	58	.	1.99223	7.22138	5.83975	PF3D7_0417000		conserved Plasmodium protein, unknown function
Pf3D7_04_v3	745411	745702	Troph_H3K4_peak_377	11	.	1.4059	2.23557	1.14582	intergenic
Pf3D7_04_v3	746388	746904	Troph_H3K4_peak_378	85	.	2.27834	10.0854	8.58314	intergenic
Pf3D7_04_v3	764795	765640	Troph_H3K4_peak_379	246	.	3.1253	26.552	24.6671	intergenic
Pf3D7_04_v3	772814	773133	Troph_H3K4_peak_380	64	.	1.91867	7.89055	6.47063	intergenic
Pf3D7_04_v3	809934	810636	Troph_H3K4_peak_381	311	.	3.52516	33.1995	31.1173	PF3D7_0418100	SOC1	protein SOC1, putative
Pf3D7_04_v3	830204	830467	Troph_H3K4_peak_382	22	.	1.58329	3.40179	2.21091	PF3D7_0418400		LSM domain-containing protein, putative	PF3D7_0418500	BET3	trafficking protein particle complex subunit 3, putative
Pf3D7_04_v3	836399	836923	Troph_H3K4_peak_383	103	.	2.20055	11.9312	10.3666	intergenic
Pf3D7_04_v3	847173	847976	Troph_H3K4_peak_384	22	.	1.57782	3.4246	2.23277	PF3D7_0418900		conserved protein, unknown function
Pf3D7_04_v3	851292	851869	Troph_H3K4_peak_385	56	.	2.0219	7.05415	5.66732	PF3D7_0419100		conserved Plasmodium protein, unknown function
Pf3D7_04_v3	854711	855215	Troph_H3K4_peak_386	112	.	2.4267	12.8692	11.2694	PF3D7_0419300		conserved Plasmodium protein, unknown function	PF3D7_0419200	GOT1	protein transport protein GOT1, putative
Pf3D7_04_v3	872502	872777	Troph_H3K4_peak_387	10	.	1.46896	2.18331	1.09944	PF3D7_0419700	Pf34	apical merozoite protein
Pf3D7_04_v3	914404	915761	Troph_H3K4_peak_388	44	.	1.85807	5.75068	4.43939	PF3D7_0420300	ApiAP2	AP2 domain transcription factor, putative
Pf3D7_04_v3	935035	939161	Troph_H3K4_peak_389	130	.	2.37044	14.6759	13.0787	intergenic
Pf3D7_04_v3	962738	965826	Troph_H3K4_peak_390	284	.	2.79377	30.5652	28.446	intergenic
Pf3D7_04_v3	967463	968253	Troph_H3K4_peak_391	328	.	3.02802	35.0904	32.89	PF3D7_0421200	RIF	rifin
Pf3D7_04_v3	968738	969944	Troph_H3K4_peak_392	99	.	2.13462	11.4843	9.95129	PF3D7_0421300	VAR	erythrocyte membrane protein 1, PfEMP1
Pf3D7_04_v3	971118	977030	Troph_H3K4_peak_393	189	.	2.55822	20.7539	18.9005	intergenic
Pf3D7_04_v3	982292	983967	Troph_H3K4_peak_394	72	.	2.12905	8.70977	7.25837	intergenic
Pf3D7_04_v3	984804	987586	Troph_H3K4_peak_395	47	.	1.87897	6.08544	4.75358	intergenic
Pf3D7_04_v3	988170	991321	Troph_H3K4_peak_396	42	.	1.82515	5.56228	4.25312	intergenic
Pf3D7_04_v3	995157	995505	Troph_H3K4_peak_397	77	.	2.19206	9.26785	7.79325	PF3D7_0421800		conserved Plasmodium protein, unknown function
Pf3D7_04_v3	997915	998328	Troph_H3K4_peak_398	46	.	1.95366	5.961	4.62403	PF3D7_0421900		conserved Plasmodium protein, unknown function	PF3D7_0422000		steroid dehydrogenase, putative
Pf3D7_04_v3	1004435	1004878	Troph_H3K4_peak_399	34	.	1.7235	4.76407	3.49012	PF3D7_0422200		erythrocyte membrane-associated antigen
Pf3D7_04_v3	1020806	1021409	Troph_H3K4_peak_400	91	.	2.31804	10.6498	9.14429	PF3D7_0422300		alpha tubulin 2
Pf3D7_04_v3	1022985	1023253	Troph_H3K4_peak_401	54	.	1.97228	6.87218	5.49301	intergenic
Pf3D7_04_v3	1026957	1027236	Troph_H3K4_peak_402	22	.	1.54522	3.48648	2.29122	intergenic
Pf3D7_04_v3	1038785	1039066	Troph_H3K4_peak_403	35	.	1.75647	4.77394	3.50618	PF3D7_0422600		conserved Plasmodium protein, unknown function	PF3D7_0422700	EIF4A3	eukaryotic initiation factor 4A-III, putative
Pf3D7_04_v3	1054784	1055259	Troph_H3K4_peak_404	33	.	1.77708	4.57097	3.30516	PF3D7_0423400	AARP	apical asparagine-rich protein AARP
Pf3D7_04_v3	1071543	1071810	Troph_H3K4_peak_405	22	.	1.58497	3.41781	2.22642	intergenic
Pf3D7_04_v3	1113420	1113651	Troph_H3K4_peak_406	15	.	1.45456	2.67382	1.54098	PF3D7_0424600		Plasmodium exported protein (PHISTb)
Pf3D7_04_v3	1117514	1117948	Troph_H3K4_peak_407	78	.	2.23521	9.28007	7.80416	intergenic
Pf3D7_04_v3	1121478	1122485	Troph_H3K4_peak_408	27	.	1.69748	3.96799	2.75196	intergenic
Pf3D7_04_v3	1123086	1126630	Troph_H3K4_peak_409	61	.	1.91736	7.52096	6.16134	PF3D7_0424800		Plasmodium exported protein (PHISTb), unknown function
Pf3D7_04_v3	1127263	1137443	Troph_H3K4_peak_410	101	.	2.18324	11.6905	10.1994	intergenic
Pf3D7_04_v3	1138000	1139416	Troph_H3K4_peak_411	51	.	1.94768	6.47608	5.11248	intergenic
Pf3D7_04_v3	1139917	1147162	Troph_H3K4_peak_412	63	.	1.99249	7.72185	6.32669	PF3D7_0425400		Plasmodium exported protein (PHISTa), unknown function
Pf3D7_04_v3	1152506	1153228	Troph_H3K4_peak_413	107	.	2.40965	12.3467	10.7467	PF3D7_0425700	RIF	rifin
Pf3D7_04_v3	1156199	1165848	Troph_H3K4_peak_414	127	.	2.37915	14.3401	12.7076	intergenic
Pf3D7_04_v3	1170764	1171062	Troph_H3K4_peak_415	26	.	1.66129	3.84474	2.63001	intergenic
Pf3D7_04_v3	1175003	1180493	Troph_H3K4_peak_416	247	.	3.16421	26.7918	24.7758	intergenic
Pf3D7_04_v3	1181116	1181547	Troph_H3K4_peak_417	305	.	3.72724	32.5944	30.5097	intergenic
Pf3D7_04_v3	1182334	1183052	Troph_H3K4_peak_418	802	.	5.6868	82.9639	80.2636	intergenic
Pf3D7_04_v3	1183654	1185881	Troph_H3K4_peak_419	21	.	1.64005	3.34093	2.15587	intergenic
Pf3D7_04_v3	1186301	1192698	Troph_H3K4_peak_420	152	.	2.65276	16.9177	15.2523	intergenic
Pf3D7_05_v3	23534	26408	Troph_H3K4_peak_421	157	.	2.7112	17.4784	15.7222	intergenic
Pf3D7_05_v3	29772	30801	Troph_H3K4_peak_422	339	.	3.89209	36.2348	33.9949	intergenic
Pf3D7_05_v3	33048	34143	Troph_H3K4_peak_423	175	.	2.76403	19.2885	17.501	PF3D7_0500400	RIF	rifin
Pf3D7_05_v3	36703	39896	Troph_H3K4_peak_424	92	.	2.21809	10.7043	9.22863	intergenic
Pf3D7_05_v3	40823	42293	Troph_H3K4_peak_425	39	.	1.78418	5.25456	3.96581	PF3D7_0500800	MESA	mature parasite-infected erythrocyte surface antigen
Pf3D7_05_v3	48045	49666	Troph_H3K4_peak_426	57	.	2.03158	7.14478	5.77422	intergenic
Pf3D7_05_v3	62066	63079	Troph_H3K4_peak_427	122	.	2.51332	13.8916	12.286	PF3D7_0501200	PIESP2	parasite-infected erythrocyte surface protein
Pf3D7_05_v3	66726	67492	Troph_H3K4_peak_428	103	.	2.42099	11.914	10.3597	PF3D7_0501300	SBP1	skeleton-binding protein 1
Pf3D7_05_v3	69651	70300	Troph_H3K4_peak_429	123	.	2.65441	14.0046	12.3443	intergenic
Pf3D7_05_v3	73015	73329	Troph_H3K4_peak_430	20	.	1.58554	3.23307	2.05776	PF3D7_0501400	FIRA	interspersed repeat antigen
Pf3D7_05_v3	74458	75345	Troph_H3K4_peak_431	81	.	2.12868	9.63185	8.16145	intergenic
Pf3D7_05_v3	76030	76717	Troph_H3K4_peak_432	55	.	1.98985	6.84981	5.50107	intergenic
Pf3D7_05_v3	77839	78799	Troph_H3K4_peak_433	166	.	2.85706	18.3586	16.6172	intergenic
Pf3D7_05_v3	79529	79912	Troph_H3K4_peak_434	143	.	2.6969	16.099	14.3936	PF3D7_0501500	RAP3	rhoptry-associated protein 3
Pf3D7_05_v3	82635	83563	Troph_H3K4_peak_435	67	.	2.15653	8.23112	6.79831	PF3D7_0501600	RAP2	rhoptry-associated protein 2
Pf3D7_05_v3	85696	86783	Troph_H3K4_peak_436	146	.	2.70568	16.3986	14.6829	PF3D7_0501700	APC3	anaphase-promoting complex subunit 3, putative
Pf3D7_05_v3	108755	109519	Troph_H3K4_peak_437	77	.	2.17815	9.18328	7.73712	PF3D7_0502400	MSP8	merozoite surface protein 8
Pf3D7_05_v3	123486	123824	Troph_H3K4_peak_438	23	.	1.67638	3.60128	2.39786	PF3D7_0502900		Tim10/DDP family zinc finger protein, putative
Pf3D7_05_v3	138077	138632	Troph_H3K4_peak_439	33	.	1.79021	4.59751	3.33366	intergenic
Pf3D7_05_v3	139394	140266	Troph_H3K4_peak_440	59	.	2.06596	7.34071	5.95588	PF3D7_0503400	ADF1	actin-depolymerizing factor 1
Pf3D7_05_v3	145917	146148	Troph_H3K4_peak_441	29	.	1.71973	4.1864	2.94256	PF3D7_0503600	MyoB	myosin B
Pf3D7_05_v3	150245	150869	Troph_H3K4_peak_442	55	.	1.9914	6.88313	5.50306	PF3D7_0503800	RPL31	60S ribosomal protein L31
Pf3D7_05_v3	154518	155717	Troph_H3K4_peak_443	88	.	2.18983	10.3075	8.82429	intergenic
Pf3D7_05_v3	160241	160481	Troph_H3K4_peak_444	23	.	1.56388	3.5574	2.35773	intergenic
Pf3D7_05_v3	174129	174477	Troph_H3K4_peak_445	67	.	2.02114	8.20339	6.77051	PF3D7_0504500		MOLO1 domain-containing protein, putative
Pf3D7_05_v3	177835	178415	Troph_H3K4_peak_446	22	.	1.54594	3.48533	2.29147	PF3D7_0504600	BCKDHB	2-oxoisovalerate dehydrogenase subunit beta, mitochondrial, putative
Pf3D7_05_v3	239707	240948	Troph_H3K4_peak_447	53	.	1.85647	6.74165	5.38012	intergenic
Pf3D7_05_v3	287834	288110	Troph_H3K4_peak_448	43	.	1.89649	5.61924	4.31279	PF3D7_0506900	ROM4	rhomboid protease ROM4
Pf3D7_05_v3	289114	289585	Troph_H3K4_peak_449	13	.	1.43891	2.51285	1.3955	intergenic
Pf3D7_05_v3	295399	295820	Troph_H3K4_peak_450	27	.	1.65776	3.96405	2.75148	intergenic
Pf3D7_05_v3	300519	301439	Troph_H3K4_peak_451	58	.	2.0397	7.2028	5.8148	PF3D7_0507300	SOPT	subtilisin-like ookinete protein SOPT
Pf3D7_05_v3	304799	306448	Troph_H3K4_peak_452	33	.	1.73372	4.55157	3.31063	PF3D7_0507400	SUB1-ProM	subtilisin propeptide-like protein
Pf3D7_05_v3	330854	331088	Troph_H3K4_peak_453	16	.	1.53657	2.80903	1.66382	PF3D7_0508100	SET9	SET domain protein, putative
Pf3D7_05_v3	342451	342897	Troph_H3K4_peak_454	12	.	1.39416	2.30663	1.21017	intergenic
Pf3D7_05_v3	365524	366217	Troph_H3K4_peak_455	25	.	1.68272	3.74237	2.53885	PF3D7_0508900	AAP6	protein AAP6
Pf3D7_05_v3	368308	368853	Troph_H3K4_peak_456	15	.	1.49295	2.6626	1.53116	intergenic
Pf3D7_05_v3	387178	387442	Troph_H3K4_peak_457	32	.	1.68372	4.49268	3.22956	PF3D7_0509200	LRR2	leucine-rich repeat protein	PF3D7_0509300		conserved Plasmodium protein, unknown function
Pf3D7_05_v3	405945	406459	Troph_H3K4_peak_458	121	.	2.40749	13.7521	12.1133	PF3D7_0509700		conserved Plasmodium protein, unknown function
Pf3D7_05_v3	423028	423390	Troph_H3K4_peak_459	20	.	1.53761	3.17696	2.00442	intergenic
Pf3D7_05_v3	434507	434945	Troph_H3K4_peak_460	147	.	2.75366	16.5124	14.7972	intergenic
Pf3D7_05_v3	451171	451585	Troph_H3K4_peak_461	278	.	2.91043	29.9309	27.886	intergenic
Pf3D7_05_v3	452378	452698	Troph_H3K4_peak_462	17	.	1.5221	2.94135	1.78685	intergenic
Pf3D7_05_v3	453434	455279	Troph_H3K4_peak_463	39	.	1.77736	5.24089	3.95051	intergenic
Pf3D7_05_v3	458008	458582	Troph_H3K4_peak_464	16	.	1.52162	2.84297	1.69802	intergenic
Pf3D7_05_v3	459450	460353	Troph_H3K4_peak_465	13	.	1.42139	2.46047	1.34821	PF3D7_0510700		conserved Plasmodium protein, unknown function
Pf3D7_05_v3	460956	461317	Troph_H3K4_peak_466	44	.	1.81959	5.80816	4.47862	PF3D7_0510800		WD repeat-containing protein, putative
Pf3D7_05_v3	465532	465838	Troph_H3K4_peak_467	59	.	1.97336	7.36606	5.96743	intergenic
Pf3D7_05_v3	480125	481085	Troph_H3K4_peak_468	35	.	1.79713	4.85287	3.58219	PF3D7_0511400		conserved Plasmodium protein, unknown function
Pf3D7_05_v3	499522	499958	Troph_H3K4_peak_469	66	.	1.97935	8.02615	6.60608	intergenic
Pf3D7_05_v3	506767	507023	Troph_H3K4_peak_470	17	.	1.48729	2.88777	1.73645	intergenic
Pf3D7_05_v3	518028	518585	Troph_H3K4_peak_471	199	.	2.92035	21.8266	19.9626	PF3D7_0511700	CGI121	EKC/KEOPS complex subunit CGI121
Pf3D7_05_v3	528955	529226	Troph_H3K4_peak_472	18	.	1.57408	2.98874	1.83176	PF3D7_0512100		conserved protein, unknown function	PF3D7_0512200	GS	glutathione synthetase
Pf3D7_05_v3	569637	569936	Troph_H3K4_peak_473	39	.	1.73836	5.23537	3.93687	PF3D7_0513400	YihA1	GTP-binding protein YihA1
Pf3D7_05_v3	573580	574248	Troph_H3K4_peak_474	31	.	1.70529	4.41769	3.1608	PF3D7_0513500	PAM16	mitochondrial import inner membrane translocase subunit TIM16, putative	PF3D7_0513600		deoxyribodipyrimidine photo-lyase, putative
Pf3D7_05_v3	592329	592657	Troph_H3K4_peak_475	14	.	1.47274	2.61844	1.49363	intergenic
Pf3D7_05_v3	613575	613862	Troph_H3K4_peak_476	42	.	1.74386	5.55708	4.24352	intergenic
Pf3D7_05_v3	627603	627914	Troph_H3K4_peak_477	24	.	1.63317	3.65136	2.44795	PF3D7_0515200		conserved Plasmodium protein, unknown function
Pf3D7_05_v3	636095	636377	Troph_H3K4_peak_478	42	.	1.88188	5.5389	4.22133	PF3D7_0515400		conserved protein, unknown function
Pf3D7_05_v3	638430	638828	Troph_H3K4_peak_479	64	.	1.94011	7.88501	6.46567	intergenic
Pf3D7_05_v3	644513	645448	Troph_H3K4_peak_480	25	.	1.66295	3.7455	2.53804	intergenic
Pf3D7_05_v3	657565	657906	Troph_H3K4_peak_481	65	.	2.14518	8.01048	6.58447	PF3D7_0515800		BolA-like protein, putative
Pf3D7_05_v3	677301	677842	Troph_H3K4_peak_482	45	.	1.90257	5.88432	4.5536	PF3D7_0516300		tRNA pseudouridine synthase, putative
Pf3D7_05_v3	711034	711950	Troph_H3K4_peak_483	61	.	2.07543	7.57877	6.19115	PF3D7_0516900	RPL2	60S ribosomal protein L2
Pf3D7_05_v3	712757	713161	Troph_H3K4_peak_484	47	.	1.80919	6.08203	4.73961	PF3D7_0516900	RPL2	60S ribosomal protein L2
Pf3D7_05_v3	714167	714531	Troph_H3K4_peak_485	74	.	2.22095	8.92125	7.4623	PF3D7_0517000		60S ribosomal protein L12, putative
Pf3D7_05_v3	715897	716163	Troph_H3K4_peak_486	22	.	1.56824	3.43794	2.24301	PF3D7_0517000		60S ribosomal protein L12, putative
Pf3D7_05_v3	719642	719929	Troph_H3K4_peak_487	14	.	1.5239	2.60739	1.48091	PF3D7_0517200		conserved Plasmodium protein, unknown function
Pf3D7_05_v3	722349	722698	Troph_H3K4_peak_488	37	.	1.78457	5.00956	3.72075	PF3D7_0517300	SR1	serine/arginine-rich splicing factor 1
Pf3D7_05_v3	725344	725764	Troph_H3K4_peak_489	18	.	1.51636	3.05605	1.89311	intergenic
Pf3D7_05_v3	747228	748029	Troph_H3K4_peak_490	19	.	1.5191	3.07001	1.90733	PF3D7_0517900		zinc finger protein, putative
Pf3D7_05_v3	758004	758873	Troph_H3K4_peak_491	34	.	1.74332	4.67682	3.42874	PF3D7_0518200	MDM2	SWIB/MDM2 domain-containing protein	PF3D7_0518300		proteasome subunit beta type-1, putative
Pf3D7_05_v3	775121	775593	Troph_H3K4_peak_492	66	.	2.09906	8.03108	6.60302	intergenic
Pf3D7_05_v3	790319	790782	Troph_H3K4_peak_493	28	.	1.67612	4.051	2.82347	PF3D7_0519100		50S ribosomal protein L14, mitochondrial, putative	PF3D7_0519200		V-type proton ATPase 16 kDa proteolipid subunit
Pf3D7_05_v3	796983	797530	Troph_H3K4_peak_494	51	.	1.90803	6.46914	5.11608	PF3D7_0519400	RPS24	40S ribosomal protein S24
Pf3D7_05_v3	799919	800529	Troph_H3K4_peak_495	132	.	2.61227	14.9175	13.2463	PF3D7_0519500	CCR4-1	CCR4 domain-containing protein 1, putative
Pf3D7_05_v3	813579	814322	Troph_H3K4_peak_496	116	.	2.43825	13.3168	11.6871	intergenic
Pf3D7_05_v3	815767	816132	Troph_H3K4_peak_497	201	.	3.10168	22.0535	20.1681	PF3D7_0519700		FoP domain-containing protein, putative
Pf3D7_05_v3	818599	818859	Troph_H3K4_peak_498	51	.	1.95581	6.49681	5.13732	intergenic
Pf3D7_05_v3	820783	821197	Troph_H3K4_peak_499	26	.	1.68622	3.911	2.68429	intergenic
Pf3D7_05_v3	828012	828485	Troph_H3K4_peak_500	21	.	1.64327	3.37729	2.19308	PF3D7_0520000	RPS9	40S ribosomal protein S9, putative
Pf3D7_05_v3	864360	864679	Troph_H3K4_peak_501	35	.	1.74804	4.83289	3.5535	intergenic
Pf3D7_05_v3	871548	872091	Troph_H3K4_peak_502	21	.	1.61415	3.34152	2.15639	intergenic
Pf3D7_05_v3	880703	881327	Troph_H3K4_peak_503	31	.	1.71757	4.40939	3.1582	intergenic
Pf3D7_05_v3	891465	891747	Troph_H3K4_peak_504	52	.	1.99384	6.59219	5.22827	intergenic
Pf3D7_05_v3	894989	895304	Troph_H3K4_peak_505	74	.	2.16969	8.88572	7.4255	PF3D7_0522000		conserved Plasmodium protein, unknown function
Pf3D7_05_v3	899668	899977	Troph_H3K4_peak_506	23	.	1.58339	3.52335	2.32371	PF3D7_0522200	TAF10	transcription initiation factor TFIID subunit 10, putative
Pf3D7_05_v3	905774	906401	Troph_H3K4_peak_507	48	.	1.9201	6.1727	4.83866	intergenic
Pf3D7_05_v3	935610	936298	Troph_H3K4_peak_508	26	.	1.58208	3.85902	2.63962	intergenic
Pf3D7_05_v3	945481	945740	Troph_H3K4_peak_509	18	.	1.54099	3.00905	1.85122	intergenic
Pf3D7_05_v3	954213	955698	Troph_H3K4_peak_510	88	.	2.20426	10.3777	8.86095	PF3D7_0523000	MDR1	multidrug resistance protein 1
Pf3D7_05_v3	963393	963827	Troph_H3K4_peak_511	14	.	1.45012	2.55531	1.4333	intergenic
Pf3D7_05_v3	966698	967476	Troph_H3K4_peak_512	98	.	2.21614	11.3726	9.82324	intergenic
Pf3D7_05_v3	986275	986553	Troph_H3K4_peak_513	34	.	1.76603	4.70802	3.43761	PF3D7_0523800		divalent metal transporter, putative
Pf3D7_05_v3	990033	990504	Troph_H3K4_peak_514	16	.	1.49605	2.78179	1.64103	intergenic
Pf3D7_05_v3	994890	995193	Troph_H3K4_peak_515	89	.	2.21795	10.5185	8.99816	PF3D7_0524000	KASbeta	karyopherin beta
Pf3D7_05_v3	996146	997195	Troph_H3K4_peak_516	41	.	1.82552	5.42391	4.13149	PF3D7_0524000	KASbeta	karyopherin beta
Pf3D7_05_v3	1001618	1002029	Troph_H3K4_peak_517	31	.	1.65427	4.45767	3.19919	PF3D7_0524100		conserved Plasmodium protein, unknown function
Pf3D7_05_v3	1010012	1010317	Troph_H3K4_peak_518	30	.	1.7475	4.32167	3.07527	PF3D7_0524300		conserved Plasmodium protein, unknown function
Pf3D7_05_v3	1011103	1011367	Troph_H3K4_peak_519	28	.	1.7043	4.10867	2.86683	PF3D7_0524300		conserved Plasmodium protein, unknown function
Pf3D7_05_v3	1013522	1014094	Troph_H3K4_peak_520	22	.	1.54934	3.41112	2.22317	PF3D7_0524400	RBG1	ribosome-interacting GTPase 1, putative
Pf3D7_05_v3	1016451	1016744	Troph_H3K4_peak_521	44	.	1.88215	5.82805	4.49838	PF3D7_0524500		conserved Plasmodium protein, unknown function	PF3D7_0524600		50S ribosomal protein L12, apicoplast, putative
Pf3D7_05_v3	1019445	1019910	Troph_H3K4_peak_522	96	.	2.32481	11.1712	9.62124	PF3D7_0524700	TOM22	mitochondrial import receptor subunit TOM22, putative
Pf3D7_05_v3	1025715	1026018	Troph_H3K4_peak_523	22	.	1.60362	3.40452	2.21371	PF3D7_0524900	TYW1	S-adenosyl-L-methionine-dependent tRNA 4-demethylwyosine synthase, putative
Pf3D7_05_v3	1031155	1031576	Troph_H3K4_peak_524	77	.	2.24457	9.2454	7.77235	intergenic
Pf3D7_05_v3	1032013	1032569	Troph_H3K4_peak_525	75	.	2.25196	9.01862	7.54164	intergenic
Pf3D7_05_v3	1033424	1033833	Troph_H3K4_peak_526	103	.	2.45472	11.933	10.3665	intergenic
Pf3D7_05_v3	1039435	1040243	Troph_H3K4_peak_527	36	.	1.7869	4.89614	3.61733	intergenic
Pf3D7_05_v3	1058825	1060145	Troph_H3K4_peak_528	39	.	1.81845	5.21046	3.92055	PF3D7_0525500		WD repeat-containing protein, putative
Pf3D7_05_v3	1074352	1075035	Troph_H3K4_peak_529	18	.	1.57576	2.96814	1.8118	intergenic
Pf3D7_05_v3	1077993	1078237	Troph_H3K4_peak_530	45	.	1.91615	5.9338	4.59489	intergenic
Pf3D7_05_v3	1097630	1098357	Troph_H3K4_peak_531	51	.	1.97323	6.46551	5.12421	PF3D7_0526600		conserved Plasmodium protein, unknown function
Pf3D7_05_v3	1099662	1100079	Troph_H3K4_peak_532	149	.	2.69164	16.6946	14.9657	intergenic
Pf3D7_05_v3	1104199	1105084	Troph_H3K4_peak_533	1096	.	6.12028	112.728	109.686	intergenic
Pf3D7_05_v3	1111974	1112448	Troph_H3K4_peak_534	61	.	1.91786	7.51871	6.11389	intergenic
Pf3D7_05_v3	1113308	1113780	Troph_H3K4_peak_535	145	.	2.58995	16.2608	14.5544	intergenic
Pf3D7_05_v3	1137639	1138128	Troph_H3K4_peak_536	58	.	2.03874	7.21771	5.82462	PF3D7_0527400		conserved Plasmodium protein, unknown function
Pf3D7_05_v3	1150067	1151422	Troph_H3K4_peak_537	200	.	2.38752	21.8188	20.0124	intergenic
Pf3D7_05_v3	1160177	1160473	Troph_H3K4_peak_538	27	.	1.61074	3.9834	2.75466	intergenic
Pf3D7_05_v3	1166294	1166606	Troph_H3K4_peak_539	52	.	1.96468	6.59138	5.23104	PF3D7_0528300		conserved protein, unknown function
Pf3D7_05_v3	1169088	1170132	Troph_H3K4_peak_540	34	.	1.78662	4.69567	3.43907	PF3D7_0528400	DHHC7	palmitoyltransferase DHHC7
Pf3D7_05_v3	1181196	1181680	Troph_H3K4_peak_541	98	.	2.26735	11.4088	9.86098	intergenic
Pf3D7_05_v3	1183877	1184213	Troph_H3K4_peak_542	58	.	2.04698	7.23866	5.84881	PF3D7_0528900		conserved protein, unknown function
Pf3D7_05_v3	1208215	1208674	Troph_H3K4_peak_543	384	.	3.5501	40.7207	38.4689	PF3D7_0529700		heptatricopeptide repeat-containing protein, putative
Pf3D7_05_v3	1220857	1221156	Troph_H3K4_peak_544	27	.	1.70939	3.9307	2.71088	intergenic
Pf3D7_05_v3	1223415	1223652	Troph_H3K4_peak_545	41	.	1.88305	5.46856	4.1551	PF3D7_0530000		conserved Plasmodium protein, unknown function
Pf3D7_05_v3	1246226	1246606	Troph_H3K4_peak_546	30	.	1.64396	4.28873	3.04237	intergenic
Pf3D7_05_v3	1255876	1256184	Troph_H3K4_peak_547	14	.	1.43945	2.58989	1.46496	intergenic
Pf3D7_05_v3	1265435	1266540	Troph_H3K4_peak_548	81	.	2.17958	9.63751	8.16387	PF3D7_0531000		SURF1 domain-containing protein, putative
Pf3D7_05_v3	1271452	1271740	Troph_H3K4_peak_549	19	.	1.55396	3.08248	1.91916	intergenic
Pf3D7_05_v3	1286994	1288365	Troph_H3K4_peak_550	227	.	3.21534	24.6098	22.7288	intergenic
Pf3D7_05_v3	1288792	1289283	Troph_H3K4_peak_551	233	.	2.93665	25.3084	23.3689	intergenic
Pf3D7_05_v3	1291518	1292183	Troph_H3K4_peak_552	312	.	3.86668	33.4342	31.2659	intergenic
Pf3D7_05_v3	1296277	1300664	Troph_H3K4_peak_553	393	.	3.53267	41.5637	39.3241	intergenic
Pf3D7_05_v3	1301195	1301845	Troph_H3K4_peak_554	49	.	1.80297	6.33446	4.97908	intergenic
Pf3D7_05_v3	1302515	1302943	Troph_H3K4_peak_555	43	.	1.90379	5.71289	4.38922	PF3D7_0532200		Plasmodium exported protein (PHISTc), unknown function
Pf3D7_05_v3	1303749	1304167	Troph_H3K4_peak_556	13	.	1.50733	2.51627	1.39966	PF3D7_0532200		Plasmodium exported protein (PHISTc), unknown function
Pf3D7_05_v3	1306817	1308006	Troph_H3K4_peak_557	105	.	2.42143	12.1302	10.5792	PF3D7_0532300		Plasmodium exported protein (PHISTb), unknown function
Pf3D7_05_v3	1309189	1309537	Troph_H3K4_peak_558	14	.	1.46099	2.52949	1.41123	intergenic
Pf3D7_05_v3	1318408	1321257	Troph_H3K4_peak_559	105	.	2.32217	12.0932	10.5467	intergenic
Pf3D7_05_v3	1321998	1325167	Troph_H3K4_peak_560	93	.	2.28101	10.8803	9.35433	intergenic
Pf3D7_05_v3	1326369	1327599	Troph_H3K4_peak_561	132	.	2.51423	14.9256	13.2798	PF3D7_0532900	RIF	rifin
Pf3D7_05_v3	1328551	1332327	Troph_H3K4_peak_562	182	.	2.74828	20.031	18.2695	intergenic
Pf3D7_05_v3	1333305	1343009	Troph_H3K4_peak_563	186	.	2.78227	20.4909	18.6316	intergenic
Pf3D7_06_v3	574	1867	Troph_H3K4_peak_564	171	.	2.79024	18.9716	17.1574	intergenic
Pf3D7_06_v3	3230	11098	Troph_H3K4_peak_565	184	.	2.7885	20.2658	18.4254	intergenic
Pf3D7_06_v3	11638	12145	Troph_H3K4_peak_566	25	.	1.68669	3.7167	2.51007	intergenic
Pf3D7_06_v3	15043	15955	Troph_H3K4_peak_567	72	.	2.07648	8.73337	7.27466	PF3D7_0600300	RIF	rifin
Pf3D7_06_v3	21925	23033	Troph_H3K4_peak_568	72	.	2.12663	8.74923	7.2948	intergenic
Pf3D7_06_v3	24423	24658	Troph_H3K4_peak_569	23	.	1.68242	3.59185	2.3821	intergenic
Pf3D7_06_v3	27511	27763	Troph_H3K4_peak_570	68	.	2.17013	8.32794	6.89203	intergenic
Pf3D7_06_v3	30675	31019	Troph_H3K4_peak_571	36	.	1.84098	4.96112	3.67696	intergenic
Pf3D7_06_v3	31940	32888	Troph_H3K4_peak_572	258	.	3.38369	27.9463	25.8902	PF3D7_0600700	RIF	rifin
Pf3D7_06_v3	35525	36430	Troph_H3K4_peak_573	91	.	2.35748	10.6725	9.14879	intergenic
Pf3D7_06_v3	36960	37193	Troph_H3K4_peak_574	30	.	1.76759	4.27196	3.02016	intergenic
Pf3D7_06_v3	38647	39512	Troph_H3K4_peak_575	216	.	3.02096	23.5457	21.6105	intergenic
Pf3D7_06_v3	74205	74535	Troph_H3K4_peak_576	132	.	2.70083	14.9514	13.2691	intergenic
Pf3D7_06_v3	76346	77388	Troph_H3K4_peak_577	239	.	3.1509	25.8862	23.9399	PF3D7_0601900		conserved Plasmodium protein, unknown function
Pf3D7_06_v3	80215	80693	Troph_H3K4_peak_578	21	.	1.61265	3.29003	2.11059	intergenic
Pf3D7_06_v3	81087	81330	Troph_H3K4_peak_579	39	.	1.84511	5.28541	3.97976	PF3D7_0602000		zinc finger protein, putative
Pf3D7_06_v3	177735	178101	Troph_H3K4_peak_580	37	.	1.82003	5.0308	3.74522	intergenic
Pf3D7_06_v3	178758	179820	Troph_H3K4_peak_581	265	.	3.35372	28.5381	26.57	intergenic
Pf3D7_06_v3	186900	187257	Troph_H3K4_peak_582	19	.	1.58716	3.13894	1.96547	intergenic
Pf3D7_06_v3	263152	263859	Troph_H3K4_peak_583	220	.	3.01016	23.9277	22.0874	PF3D7_0606300		conserved Plasmodium protein, unknown function	PF3D7_0606400		conserved Plasmodium protein, unknown function
Pf3D7_06_v3	291451	291726	Troph_H3K4_peak_584	58	.	2.05117	7.22408	5.83158	PF3D7_0607000		translation initiation factor IF-2, putative
Pf3D7_06_v3	317724	318909	Troph_H3K4_peak_585	44	.	1.88312	5.76314	4.44202	intergenic
Pf3D7_06_v3	320020	320363	Troph_H3K4_peak_586	37	.	1.81173	5.02303	3.73964	PF3D7_0607700		conserved Plasmodium protein, unknown function
Pf3D7_06_v3	326228	326479	Troph_H3K4_peak_587	23	.	1.62977	3.59863	2.39359	intergenic
Pf3D7_06_v3	354297	354664	Troph_H3K4_peak_588	49	.	1.95406	6.30715	4.95545	PF3D7_0608600		conserved Plasmodium protein, unknown function
Pf3D7_06_v3	361044	361403	Troph_H3K4_peak_589	105	.	2.47253	12.1154	10.5348	PF3D7_0608800	OAT	ornithine aminotransferase
Pf3D7_06_v3	362751	363871	Troph_H3K4_peak_590	128	.	2.27895	14.4139	12.8089	PF3D7_0608900		conserved Plasmodium protein, unknown function
Pf3D7_06_v3	402521	403032	Troph_H3K4_peak_591	20	.	1.5825	3.20931	2.03518	PF3D7_0609500		conserved Plasmodium protein, unknown function
Pf3D7_06_v3	423752	424566	Troph_H3K4_peak_592	32	.	1.77395	4.45315	3.20205	PF3D7_0609900		conserved Plasmodium protein, unknown function
Pf3D7_06_v3	425061	425367	Troph_H3K4_peak_593	82	.	2.26167	9.73294	8.23882	intergenic
Pf3D7_06_v3	437942	438228	Troph_H3K4_peak_594	29	.	1.65889	4.159	2.92064	PF3D7_0610200	RBM25	RNA-binding protein 25, putative
Pf3D7_06_v3	443561	444058	Troph_H3K4_peak_595	215	.	3.24216	23.494	21.5834	PF3D7_0610400	H3	histone H3	PF3D7_0610500		peptidyl-tRNA hydrolase PTRHD1, putative
Pf3D7_06_v3	445801	446161	Troph_H3K4_peak_596	18	.	1.56161	3.02713	1.865	intergenic
Pf3D7_06_v3	455305	455632	Troph_H3K4_peak_597	31	.	1.69482	4.45303	3.19689	PF3D7_0610900	SPT5	transcription elongation factor SPT5, putative
Pf3D7_06_v3	457857	458273	Troph_H3K4_peak_598	10	.	1.39515	2.14067	1.06167	intergenic
Pf3D7_06_v3	470216	471048	Troph_H3K4_peak_599	22	.	1.57005	3.43455	2.24283	PF3D7_0611300	ATPTG2	ATP synthase-associated protein, putative	PF3D7_0611400	SWIB	SWI/SNF-related matrix-associated actin-dependent regulator of chromatin
Pf3D7_06_v3	471750	472426	Troph_H3K4_peak_600	18	.	1.53994	3.03069	1.86996	PF3D7_0611400	SWIB	SWI/SNF-related matrix-associated actin-dependent regulator of chromatin
Pf3D7_06_v3	473729	474070	Troph_H3K4_peak_601	13	.	1.46531	2.51524	1.39895	intergenic
Pf3D7_06_v3	476066	477057	Troph_H3K4_peak_602	40	.	1.75025	5.35918	4.05933	intergenic
Pf3D7_06_v3	477534	478245	Troph_H3K4_peak_603	14	.	1.47668	2.53558	1.41681	intergenic
Pf3D7_06_v3	482783	483425	Troph_H3K4_peak_604	16	.	1.50075	2.82176	1.67688	PF3D7_0611500		conserved protein, unknown function
Pf3D7_06_v3	485458	486184	Troph_H3K4_peak_605	29	.	1.65574	4.18392	2.94654	intergenic
Pf3D7_06_v3	487427	488805	Troph_H3K4_peak_606	50	.	1.89343	6.39462	5.05496	PF3D7_0611700	RPL39	60S ribosomal protein L39
Pf3D7_06_v3	489730	490049	Troph_H3K4_peak_607	29	.	1.69631	4.24434	2.99929	PF3D7_0611800		conserved Plasmodium protein, unknown function
Pf3D7_06_v3	498655	498905	Troph_H3K4_peak_608	30	.	1.71808	4.25041	3.00585	intergenic
Pf3D7_06_v3	503881	504136	Troph_H3K4_peak_609	50	.	1.99896	6.37936	5.02191	intergenic
Pf3D7_06_v3	524463	524867	Troph_H3K4_peak_610	50	.	1.80443	6.38132	5.03675	intergenic
Pf3D7_06_v3	541587	542010	Troph_H3K4_peak_611	67	.	1.94856	8.13597	6.71192	intergenic
Pf3D7_06_v3	556415	556980	Troph_H3K4_peak_612	70	.	2.14734	8.48953	7.03477	intergenic
Pf3D7_06_v3	563459	563715	Troph_H3K4_peak_613	71	.	2.18331	8.54751	7.10611	intergenic
Pf3D7_06_v3	564515	564902	Troph_H3K4_peak_614	24	.	1.68978	3.66921	2.45742	intergenic
Pf3D7_06_v3	578656	578936	Troph_H3K4_peak_615	26	.	1.63345	3.83515	2.61846	PF3D7_0613900	MyoE	myosin E, putative
Pf3D7_06_v3	579421	579888	Troph_H3K4_peak_616	42	.	1.76812	5.51503	4.20577	PF3D7_0613900	MyoE	myosin E, putative
Pf3D7_06_v3	582179	582591	Troph_H3K4_peak_617	66	.	1.97366	8.10494	6.67406	intergenic
Pf3D7_06_v3	587029	587401	Troph_H3K4_peak_618	19	.	1.53997	3.15271	1.98321	PF3D7_0614000		thiamine-phosphate synthase, putative
Pf3D7_06_v3	601395	601655	Troph_H3K4_peak_619	51	.	1.94477	6.49856	5.13234	PF3D7_0614400	CWF7	pre-mRNA-splicing factor CWF7, putative
Pf3D7_06_v3	608190	608447	Troph_H3K4_peak_620	49	.	1.98253	6.31191	4.95792	PF3D7_0614600		conserved Plasmodium protein, unknown function
Pf3D7_06_v3	610990	611845	Troph_H3K4_peak_621	76	.	2.21427	9.10562	7.64325	PF3D7_0614700		F-box protein FBXO6, putative
Pf3D7_06_v3	613155	613902	Troph_H3K4_peak_622	29	.	1.65977	4.21029	2.96542	intergenic
Pf3D7_06_v3	657972	658348	Troph_H3K4_peak_623	58	.	1.94559	7.19278	5.80178	PF3D7_0615800	COG4	conserved oligomeric Golgi complex subunit 4, putative
Pf3D7_06_v3	672132	672743	Troph_H3K4_peak_624	130	.	2.48483	14.7428	13.0868	PF3D7_0616100		conserved Plasmodium protein, unknown function
Pf3D7_06_v3	675411	675644	Troph_H3K4_peak_625	28	.	1.71674	4.12613	2.89137	intergenic
Pf3D7_06_v3	703923	704319	Troph_H3K4_peak_626	32	.	1.64791	4.47995	3.22095	PF3D7_0617000	TOM40	mitochondrial import receptor subunit TOM40, putative
Pf3D7_06_v3	726198	731968	Troph_H3K4_peak_627	115	.	2.32417	13.2244	11.5998	intergenic
Pf3D7_06_v3	732617	732874	Troph_H3K4_peak_628	30	.	1.7588	4.32708	3.07248	intergenic
Pf3D7_06_v3	734059	743969	Troph_H3K4_peak_629	112	.	2.29425	12.8049	11.2298	PF3D7_0617600		stevor
Pf3D7_06_v3	744368	744889	Troph_H3K4_peak_630	28	.	1.6768	4.07253	2.8413	intergenic
Pf3D7_06_v3	747132	747593	Troph_H3K4_peak_631	19	.	1.53948	3.08704	1.92273	PF3D7_0617800	H2A	histone H2A
Pf3D7_06_v3	748513	748770	Troph_H3K4_peak_632	26	.	1.59271	3.88623	2.66288	intergenic
Pf3D7_06_v3	749560	750026	Troph_H3K4_peak_633	95	.	2.37887	11.0342	9.50249	intergenic
Pf3D7_06_v3	751086	751518	Troph_H3K4_peak_634	41	.	1.80969	5.49837	4.19032	intergenic
Pf3D7_06_v3	752524	752791	Troph_H3K4_peak_635	23	.	1.66678	3.50797	2.30812	PF3D7_0617900	H3.3	histone H3 variant
Pf3D7_06_v3	756695	757157	Troph_H3K4_peak_636	266	.	3.39687	28.7029	26.6948	PF3D7_0618000		conserved Plasmodium membrane protein, unknown function
Pf3D7_06_v3	757721	758238	Troph_H3K4_peak_637	145	.	2.64585	16.311	14.5927	PF3D7_0618000		conserved Plasmodium membrane protein, unknown function
Pf3D7_06_v3	760175	760560	Troph_H3K4_peak_638	53	.	1.88109	6.71845	5.34397	intergenic
Pf3D7_06_v3	767585	768025	Troph_H3K4_peak_639	22	.	1.62957	3.48181	2.28555	PF3D7_0618300		60S ribosomal protein L27a, putative
Pf3D7_06_v3	768826	769342	Troph_H3K4_peak_640	13	.	1.48206	2.46485	1.35305	intergenic
Pf3D7_06_v3	773358	773650	Troph_H3K4_peak_641	27	.	1.71896	3.98146	2.74965	PF3D7_0618500	MDH	malate dehydrogenase
Pf3D7_06_v3	780013	780852	Troph_H3K4_peak_642	43	.	1.80027	5.61773	4.31058	PF3D7_0618800		heptatricopeptide repeat-containing protein, putative
Pf3D7_06_v3	853831	854085	Troph_H3K4_peak_643	21	.	1.60438	3.34486	2.16449	PF3D7_0620500		cleavage stimulation factor subunit 1, putative
Pf3D7_06_v3	860692	861916	Troph_H3K4_peak_644	279	.	2.99529	30.0122	27.9768	intergenic
Pf3D7_06_v3	872625	872957	Troph_H3K4_peak_645	65	.	2.09344	7.98589	6.55844	PF3D7_0621300	PUF3	mRNA-binding protein PUF3
Pf3D7_06_v3	878949	880269	Troph_H3K4_peak_646	143	.	2.39507	16.0208	14.3767	intergenic
Pf3D7_06_v3	883446	883769	Troph_H3K4_peak_647	56	.	1.88838	6.97584	5.60039	PF3D7_0621700		RAP protein, putative
Pf3D7_06_v3	889326	889693	Troph_H3K4_peak_648	24	.	1.64037	3.68856	2.47867	intergenic
Pf3D7_06_v3	890628	890945	Troph_H3K4_peak_649	15	.	1.50646	2.62796	1.50054	PF3D7_0621800		nascent polypeptide-associated complex subunit alpha, putative
Pf3D7_06_v3	913234	913752	Troph_H3K4_peak_650	139	.	2.51845	15.6546	13.9718	PF3D7_0622600	QCR9	cytochrome b-c1 complex subunit 9, putative
Pf3D7_06_v3	932267	932662	Troph_H3K4_peak_651	24	.	1.67502	3.63641	2.42675	intergenic
Pf3D7_06_v3	933283	933955	Troph_H3K4_peak_652	64	.	2.09938	7.89166	6.49264	intergenic
Pf3D7_06_v3	935000	935706	Troph_H3K4_peak_653	153	.	2.83648	17.1347	15.3954	PF3D7_0623000	CS	chorismate synthase
Pf3D7_06_v3	952208	952536	Troph_H3K4_peak_654	55	.	2.04485	6.94249	5.56342	PF3D7_0623500	SOD2	superoxide dismutase [Fe]
Pf3D7_06_v3	973321	973595	Troph_H3K4_peak_655	34	.	1.65768	4.69073	3.41874	intergenic
Pf3D7_06_v3	995331	995878	Troph_H3K4_peak_656	63	.	2.03791	7.74084	6.33998	intergenic
Pf3D7_06_v3	999622	1000136	Troph_H3K4_peak_657	15	.	1.45413	2.67507	1.54382	intergenic
Pf3D7_06_v3	1022182	1022458	Troph_H3K4_peak_658	43	.	1.91997	5.68535	4.36463	PF3D7_0625100	SMS2	sphingomyelin synthase 2, putative
Pf3D7_06_v3	1037275	1037603	Troph_H3K4_peak_659	14	.	1.52283	2.55849	1.43597	PF3D7_0625600	PAP	poly(A) polymerase PAP, putative
Pf3D7_06_v3	1061675	1062434	Troph_H3K4_peak_660	49	.	1.79085	6.28204	4.95524	PF3D7_0626300	FabB/FabF	3-oxoacyl-acyl-carrier protein synthase I/II
Pf3D7_06_v3	1068212	1068454	Troph_H3K4_peak_661	16	.	1.53358	2.84551	1.69843	intergenic
Pf3D7_06_v3	1071385	1071807	Troph_H3K4_peak_662	48	.	1.85851	6.20148	4.86786	intergenic
Pf3D7_06_v3	1075871	1076178	Troph_H3K4_peak_663	16	.	1.46517	2.73842	1.60218	intergenic
Pf3D7_06_v3	1077028	1077919	Troph_H3K4_peak_664	57	.	2.00696	7.14616	5.75784	PF3D7_0626800	PyrK	pyruvate kinase
Pf3D7_06_v3	1080707	1081083	Troph_H3K4_peak_665	22	.	1.52751	3.49019	2.29313	intergenic
Pf3D7_06_v3	1083753	1084211	Troph_H3K4_peak_666	77	.	2.14088	9.27143	7.79301	PF3D7_0627000		conserved Plasmodium protein, unknown function
Pf3D7_06_v3	1084661	1085609	Troph_H3K4_peak_667	29	.	1.71293	4.16344	2.929	intergenic
Pf3D7_06_v3	1100327	1100647	Troph_H3K4_peak_668	20	.	1.56209	3.27467	2.09483	PF3D7_0627400	TIM22	mitochondrial import inner membrane translocase subunit TIM22, putative	PF3D7_0627500	DJ1	protein DJ-1
Pf3D7_06_v3	1101753	1102108	Troph_H3K4_peak_669	76	.	2.06368	9.11031	7.64077	PF3D7_0627500	DJ1	protein DJ-1
Pf3D7_06_v3	1103147	1103641	Troph_H3K4_peak_670	24	.	1.68778	3.69926	2.491	PF3D7_0627600		conserved Plasmodium protein, unknown function
Pf3D7_06_v3	1154536	1155042	Troph_H3K4_peak_671	120	.	2.47136	13.6872	12.0717	intergenic
Pf3D7_06_v3	1155646	1155915	Troph_H3K4_peak_672	32	.	1.77981	4.48301	3.22266	intergenic
Pf3D7_06_v3	1174718	1174960	Troph_H3K4_peak_673	19	.	1.618	3.166	1.98983	intergenic
Pf3D7_06_v3	1183835	1184125	Troph_H3K4_peak_674	45	.	1.86812	5.84638	4.52089	PF3D7_0628700		conserved Plasmodium protein, unknown function	PF3D7_0628800	GATB	glutamyl-tRNA(Gln) amidotransferase subunit B
Pf3D7_06_v3	1203725	1203980	Troph_H3K4_peak_675	40	.	1.88603	5.33652	4.03092	intergenic
Pf3D7_06_v3	1219828	1220245	Troph_H3K4_peak_676	44	.	1.92465	5.76302	4.4373	intergenic
Pf3D7_06_v3	1252037	1252736	Troph_H3K4_peak_677	15	.	1.53021	2.67741	1.54515	PF3D7_0630000		CPW-WPC family protein
Pf3D7_06_v3	1286622	1287038	Troph_H3K4_peak_678	19	.	1.56797	3.08122	1.91849	intergenic
Pf3D7_06_v3	1291490	1292413	Troph_H3K4_peak_679	66	.	1.89325	8.05307	6.66113	intergenic
Pf3D7_06_v3	1330150	1331033	Troph_H3K4_peak_680	241	.	3.12646	26.1141	24.1278	PF3D7_0631800	RIF	rifin
Pf3D7_06_v3	1333120	1335016	Troph_H3K4_peak_681	69	.	2.06983	8.32196	6.90806	intergenic
Pf3D7_06_v3	1335434	1338691	Troph_H3K4_peak_682	107	.	2.38573	12.3649	10.7863	PF3D7_0632000	RIF	rifin
Pf3D7_06_v3	1341299	1342160	Troph_H3K4_peak_683	96	.	2.30828	11.2574	9.69582	PF3D7_0632200	RIF	rifin
Pf3D7_06_v3	1347897	1348326	Troph_H3K4_peak_684	32	.	1.80076	4.55381	3.28635	PF3D7_0632300	RIF	rifin
Pf3D7_06_v3	1349030	1349302	Troph_H3K4_peak_685	34	.	1.81854	4.75263	3.479	intergenic
Pf3D7_06_v3	1351190	1352054	Troph_H3K4_peak_686	67	.	2.07969	8.2325	6.79769	PF3D7_0632400	RIF	rifin
Pf3D7_06_v3	1354229	1355486	Troph_H3K4_peak_687	62	.	2.09455	7.65688	6.2519	PF3D7_0632500	VAR	erythrocyte membrane protein 1, PfEMP1
Pf3D7_06_v3	1356012	1366593	Troph_H3K4_peak_688	88	.	2.17478	10.3644	8.84354	intergenic
Pf3D7_06_v3	1368371	1368938	Troph_H3K4_peak_689	98	.	2.35856	11.3835	9.81874	intergenic
Pf3D7_06_v3	1371997	1372820	Troph_H3K4_peak_690	62	.	2.03869	7.61211	6.20187	PF3D7_0632700	RIF	rifin
Pf3D7_06_v3	1374985	1375331	Troph_H3K4_peak_691	94	.	2.38625	10.9578	9.4239	PF3D7_0632800	VAR	erythrocyte membrane protein 1, PfEMP1
Pf3D7_06_v3	1376285	1376654	Troph_H3K4_peak_692	27	.	1.72449	3.98901	2.76264	intergenic
Pf3D7_06_v3	1377333	1382817	Troph_H3K4_peak_693	163	.	2.7402	18.1151	16.3409	intergenic
Pf3D7_06_v3	1383541	1383841	Troph_H3K4_peak_694	66	.	2.14895	8.11011	6.68736	intergenic
Pf3D7_06_v3	1384284	1385275	Troph_H3K4_peak_695	214	.	3.13123	23.2624	21.4238	intergenic
Pf3D7_06_v3	1386105	1386680	Troph_H3K4_peak_696	21	.	1.61873	3.36994	2.19234	intergenic
Pf3D7_06_v3	1389213	1389573	Troph_H3K4_peak_697	22	.	1.54143	3.48383	2.28871	intergenic
Pf3D7_06_v3	1404919	1406760	Troph_H3K4_peak_698	746	.	5.25029	77.243	74.6279	intergenic
Pf3D7_06_v3	1407822	1408089	Troph_H3K4_peak_699	59	.	2.07402	7.30121	5.91042	intergenic
Pf3D7_06_v3	1409194	1410243	Troph_H3K4_peak_700	175	.	2.89011	19.294	17.5516	intergenic
Pf3D7_07_v3	7593	11567	Troph_H3K4_peak_701	424	.	4.14279	44.7428	42.4963	intergenic
Pf3D7_07_v3	12895	14388	Troph_H3K4_peak_702	33	.	1.78654	4.57158	3.31107	intergenic
Pf3D7_07_v3	15442	15669	Troph_H3K4_peak_703	13	.	1.51611	2.47075	1.3562	intergenic
Pf3D7_07_v3	16966	18101	Troph_H3K4_peak_704	547	.	4.64039	57.0023	54.7021	intergenic
Pf3D7_07_v3	18859	19497	Troph_H3K4_peak_705	1361	.	8.0424	139.629	136.141	intergenic
Pf3D7_07_v3	20105	25915	Troph_H3K4_peak_706	198	.	2.88142	21.6777	19.8091	intergenic
Pf3D7_07_v3	30230	31239	Troph_H3K4_peak_707	166	.	2.69033	18.3741	16.6565	PF3D7_0700200	RIF	rifin
Pf3D7_07_v3	35096	36133	Troph_H3K4_peak_708	41	.	1.8947	5.50356	4.19174	intergenic
Pf3D7_07_v3	36873	37389	Troph_H3K4_peak_709	205	.	3.02464	22.4342	20.5419	PF3D7_0700400		stevor
Pf3D7_07_v3	40330	41429	Troph_H3K4_peak_710	118	.	2.44976	13.5107	11.8913	PF3D7_0700500	RIF	rifin
Pf3D7_07_v3	41930	42187	Troph_H3K4_peak_711	23	.	1.66903	3.52034	2.31936	intergenic
Pf3D7_07_v3	42619	43132	Troph_H3K4_peak_712	19	.	1.57345	3.14124	1.97411	intergenic
Pf3D7_07_v3	50267	50688	Troph_H3K4_peak_713	51	.	1.99605	6.5005	5.1468	intergenic
Pf3D7_07_v3	55666	56337	Troph_H3K4_peak_714	63	.	2.11771	7.76216	6.34986	PF3D7_0701100	RIF	rifin
Pf3D7_07_v3	59258	60010	Troph_H3K4_peak_715	244	.	3.14727	26.5091	24.4966	intergenic
Pf3D7_07_v3	73843	74819	Troph_H3K4_peak_716	39	.	1.85478	5.2751	3.97625	intergenic
Pf3D7_07_v3	75895	79345	Troph_H3K4_peak_717	61	.	1.91052	7.55789	6.17389	intergenic
Pf3D7_07_v3	79749	81242	Troph_H3K4_peak_718	72	.	2.03214	8.73795	7.29616	intergenic
Pf3D7_07_v3	82076	82347	Troph_H3K4_peak_719	12	.	1.44339	2.32311	1.22498	intergenic
Pf3D7_07_v3	83517	83812	Troph_H3K4_peak_720	95	.	2.40428	11.1014	9.55143	PF3D7_0702000		Plasmodium exported protein (hyp12), unknown function
Pf3D7_07_v3	87300	88332	Troph_H3K4_peak_721	46	.	1.89917	5.9836	4.65936	intergenic
Pf3D7_07_v3	89169	90784	Troph_H3K4_peak_722	62	.	1.90979	7.58886	6.20116	intergenic
Pf3D7_07_v3	96712	97277	Troph_H3K4_peak_723	21	.	1.64079	3.33592	2.14924	intergenic
Pf3D7_07_v3	99702	100968	Troph_H3K4_peak_724	261	.	3.31422	28.1215	26.1025	PF3D7_0702400	SEMP1	small exported membrane protein 1
Pf3D7_07_v3	106913	108088	Troph_H3K4_peak_725	130	.	2.63489	14.692	13.0458	intergenic
Pf3D7_07_v3	109843	110713	Troph_H3K4_peak_726	47	.	1.88687	6.08704	4.74486	PF3D7_0702600		chitinase, fragment
Pf3D7_07_v3	111301	112294	Troph_H3K4_peak_727	281	.	2.77577	30.1553	28.1003	PF3D7_0702900		centrin, putative
Pf3D7_07_v3	133750	133979	Troph_H3K4_peak_728	38	.	1.81838	5.11352	3.81577	PF3D7_0703500		erythrocyte membrane-associated antigen
Pf3D7_07_v3	139173	139400	Troph_H3K4_peak_729	21	.	1.50682	3.36009	2.1736	intergenic
Pf3D7_07_v3	141595	142344	Troph_H3K4_peak_730	30	.	1.6217	4.30233	3.05681	intergenic
Pf3D7_07_v3	146942	147418	Troph_H3K4_peak_731	22	.	1.56979	3.41458	2.22671	PF3D7_0703700		conserved protein, unknown function
Pf3D7_07_v3	148987	149416	Troph_H3K4_peak_732	37	.	1.84133	5.05873	3.77596	PF3D7_0703800		conserved Plasmodium protein, unknown function
Pf3D7_07_v3	153839	154186	Troph_H3K4_peak_733	20	.	1.54458	3.22063	2.04321	PF3D7_0703900		conserved Plasmodium membrane protein, unknown function
Pf3D7_07_v3	194329	194600	Troph_H3K4_peak_734	45	.	1.7862	5.82608	4.50072	intergenic
Pf3D7_07_v3	215199	216205	Troph_H3K4_peak_735	144	.	2.73441	16.126	14.4154	PF3D7_0704600	UT	HECT-type E3 ubiquitin ligase UT
Pf3D7_07_v3	237190	237503	Troph_H3K4_peak_736	26	.	1.65621	3.84607	2.6273	PF3D7_0704800	PPM12	protein phosphatase PPM12, putative
Pf3D7_07_v3	252546	252998	Troph_H3K4_peak_737	110	.	2.26255	12.6187	11.0305	PF3D7_0705100		conserved Plasmodium protein, unknown function
Pf3D7_07_v3	287726	287980	Troph_H3K4_peak_738	10	.	1.46822	2.18376	1.09997	PF3D7_0705800	CRISP	cysteine-rich secretory protein
Pf3D7_07_v3	307736	308257	Troph_H3K4_peak_739	111	.	2.43425	12.7278	11.1206	intergenic
Pf3D7_07_v3	309935	310210	Troph_H3K4_peak_740	37	.	1.80716	5.04761	3.75794	PF3D7_0706500		conserved Plasmodium protein, unknown function
Pf3D7_07_v3	325928	326997	Troph_H3K4_peak_741	322	.	2.93689	34.3254	32.2666	intergenic
Pf3D7_07_v3	327723	328042	Troph_H3K4_peak_742	141	.	2.23805	15.8733	14.1686	intergenic
Pf3D7_07_v3	328782	329222	Troph_H3K4_peak_743	97	.	1.9327	11.3354	9.79001	PF3D7_0707200		conserved Plasmodium protein, unknown function
Pf3D7_07_v3	337895	338281	Troph_H3K4_peak_744	37	.	1.8179	5.08542	3.79099	PF3D7_0707300	RAMA	rhoptry-associated membrane antigen
Pf3D7_07_v3	345453	345711	Troph_H3K4_peak_745	32	.	1.62081	4.55385	3.29381	intergenic
Pf3D7_07_v3	379779	380944	Troph_H3K4_peak_746	27	.	1.59139	3.98257	2.76099	PF3D7_0708400	HSP90	heat shock protein 90
Pf3D7_07_v3	384994	385351	Troph_H3K4_peak_747	37	.	1.51871	5.03618	3.7503	PF3D7_0708500		heat shock protein 86 family protein
Pf3D7_07_v3	386273	386951	Troph_H3K4_peak_748	23	.	1.58813	3.50848	2.31645	intergenic
Pf3D7_07_v3	388993	389379	Troph_H3K4_peak_749	151	.	2.67847	16.9167	15.1854	PF3D7_0708600	IMC1d	inner membrane complex protein 1d, putative
Pf3D7_07_v3	393843	394251	Troph_H3K4_peak_750	14	.	1.52167	2.62549	1.49667	PF3D7_0708800	HSP110c	heat shock protein 110
Pf3D7_07_v3	401071	401334	Troph_H3K4_peak_751	42	.	1.87977	5.53525	4.22942	intergenic
Pf3D7_07_v3	405550	406241	Troph_H3K4_peak_752	38	.	1.80608	5.14417	3.87042	intergenic
Pf3D7_07_v3	442770	443146	Troph_H3K4_peak_753	13	.	1.44118	2.47683	1.36348	intergenic
Pf3D7_07_v3	476941	477255	Troph_H3K4_peak_754	15	.	1.49898	2.71346	1.57726	intergenic
Pf3D7_07_v3	496573	496962	Troph_H3K4_peak_755	30	.	1.61783	4.32076	3.07913	intergenic
Pf3D7_07_v3	514033	519814	Troph_H3K4_peak_756	262	.	3.05179	28.2564	26.2891	intergenic
Pf3D7_07_v3	527179	527811	Troph_H3K4_peak_757	26	.	1.71425	3.903	2.68132	PF3D7_0712000	VAR	erythrocyte membrane protein 1, PfEMP1
Pf3D7_07_v3	529576	535496	Troph_H3K4_peak_758	185	.	2.76729	20.3366	18.5041	intergenic
Pf3D7_07_v3	537151	537779	Troph_H3K4_peak_759	50	.	1.98676	6.42785	5.07889	intergenic
Pf3D7_07_v3	538855	539735	Troph_H3K4_peak_760	32	.	1.78994	4.55814	3.29999	intergenic
Pf3D7_07_v3	540808	541318	Troph_H3K4_peak_761	50	.	1.99663	6.38739	5.02993	intergenic
Pf3D7_07_v3	542963	544080	Troph_H3K4_peak_762	124	.	2.57266	14.1248	12.4605	PF3D7_0712300	VAR	erythrocyte membrane protein 1, PfEMP1
Pf3D7_07_v3	545049	550709	Troph_H3K4_peak_763	129	.	2.48839	14.5733	12.9179	intergenic
Pf3D7_07_v3	551404	552214	Troph_H3K4_peak_764	255	.	3.32208	27.4712	25.5725	PF3D7_0712400	VAR	erythrocyte membrane protein 1, PfEMP1
Pf3D7_07_v3	554091	559251	Troph_H3K4_peak_765	119	.	2.39303	13.6032	11.9625	intergenic
Pf3D7_07_v3	561607	562206	Troph_H3K4_peak_766	31	.	1.75922	4.39207	3.14244	intergenic
Pf3D7_07_v3	562964	563964	Troph_H3K4_peak_767	77	.	2.18738	9.2446	7.76752	intergenic
Pf3D7_07_v3	566730	567871	Troph_H3K4_peak_768	74	.	2.17307	8.87622	7.42649	PF3D7_0712600	VAR	erythrocyte membrane protein 1, PfEMP1
Pf3D7_07_v3	568835	574532	Troph_H3K4_peak_769	156	.	2.6016	17.3928	15.6569	intergenic
Pf3D7_07_v3	583457	589128	Troph_H3K4_peak_770	135	.	2.52529	15.2064	13.5134	intergenic
Pf3D7_07_v3	592241	598009	Troph_H3K4_peak_771	200	.	2.77139	21.9441	20.0928	intergenic
Pf3D7_07_v3	598949	603414	Troph_H3K4_peak_772	69	.	2.00441	8.3575	6.92859	PF3D7_0713000	RIF	rifin
Pf3D7_07_v3	604353	605278	Troph_H3K4_peak_773	21	.	1.62888	3.33207	2.15152	PF3D7_0713100	MC-2TM	Pfmc-2TM Maurer's cleft two transmembrane protein
Pf3D7_07_v3	605879	606398	Troph_H3K4_peak_774	67	.	2.08968	8.13717	6.71455	PF3D7_0713100	MC-2TM	Pfmc-2TM Maurer's cleft two transmembrane protein	PF3D7_0713200	EPF1	exported protein family 1
Pf3D7_07_v3	606813	607223	Troph_H3K4_peak_775	35	.	1.74839	4.77825	3.50708	PF3D7_0713200	EPF1	exported protein family 1
Pf3D7_07_v3	607707	609634	Troph_H3K4_peak_776	31	.	1.7577	4.43688	3.18748	intergenic
Pf3D7_07_v3	640714	641789	Troph_H3K4_peak_777	70	.	2.0327	8.45723	7.0287	PF3D7_0714000	H2B.Z	histone H2B variant
Pf3D7_07_v3	644350	645737	Troph_H3K4_peak_778	50	.	1.95684	6.43121	5.09369	intergenic
Pf3D7_07_v3	669355	669745	Troph_H3K4_peak_779	17	.	1.50221	2.89143	1.74254	intergenic
Pf3D7_07_v3	670669	670996	Troph_H3K4_peak_780	115	.	2.12379	13.2008	11.5861	intergenic
Pf3D7_07_v3	671404	671931	Troph_H3K4_peak_781	275	.	2.66188	29.5573	27.535	intergenic
Pf3D7_07_v3	672483	672963	Troph_H3K4_peak_782	643	.	4.03048	66.9321	64.3607	PF3D7_0715000	PNPase	4-nitrophenylphosphatase
Pf3D7_07_v3	673996	674263	Troph_H3K4_peak_783	18	.	1.49996	3.03042	1.86897	PF3D7_0715100	MYCBP	C-Myc-binding protein, putative
Pf3D7_07_v3	700371	700735	Troph_H3K4_peak_784	12	.	1.46303	2.303	1.20773	intergenic
Pf3D7_07_v3	702026	702328	Troph_H3K4_peak_785	31	.	1.77113	4.40095	3.14669	PF3D7_0716000		RNA-binding protein, putative
Pf3D7_07_v3	750377	750655	Troph_H3K4_peak_786	14	.	1.48942	2.54765	1.42667	intergenic
Pf3D7_07_v3	754515	754813	Troph_H3K4_peak_787	11	.	1.45532	2.21536	1.12758	PF3D7_0717500	CDPK4	calcium-dependent protein kinase 4
Pf3D7_07_v3	770212	770781	Troph_H3K4_peak_788	42	.	1.85851	5.60398	4.29121	intergenic
Pf3D7_07_v3	808160	808928	Troph_H3K4_peak_789	37	.	1.72943	5.00333	3.72707	intergenic
Pf3D7_07_v3	813354	814308	Troph_H3K4_peak_790	20	.	1.51503	3.19594	2.02466	intergenic
Pf3D7_07_v3	819781	821615	Troph_H3K4_peak_791	70	.	2.08035	8.50552	7.08026	intergenic
Pf3D7_07_v3	826382	826874	Troph_H3K4_peak_792	95	.	2.31392	11.0751	9.53578	PF3D7_0718600		conserved Plasmodium protein, unknown function
Pf3D7_07_v3	833945	834466	Troph_H3K4_peak_793	30	.	1.67884	4.3118	3.05972	PF3D7_0718800		conserved protein, unknown function
Pf3D7_07_v3	837245	837506	Troph_H3K4_peak_794	16	.	1.5108	2.79826	1.65618	PF3D7_0719000		conserved protein, unknown function
Pf3D7_07_v3	841885	842834	Troph_H3K4_peak_795	95	.	2.20597	11.0454	9.53653	intergenic
Pf3D7_07_v3	855253	856112	Troph_H3K4_peak_796	58	.	1.93919	7.23504	5.84507	intergenic
Pf3D7_07_v3	860133	860781	Troph_H3K4_peak_797	33	.	1.77316	4.62502	3.37053	PF3D7_0719700	RPS10	40S ribosomal protein S10, putative
Pf3D7_07_v3	862057	862437	Troph_H3K4_peak_798	13	.	1.49609	2.49227	1.37673	PF3D7_0719800		conserved protein, unknown function
Pf3D7_07_v3	871459	871701	Troph_H3K4_peak_799	27	.	1.64409	3.93248	2.7058	intergenic
Pf3D7_07_v3	881826	882490	Troph_H3K4_peak_800	31	.	1.74409	4.43597	3.19068	PF3D7_0720400	AIF	apoptosis-inducing factor, putative
Pf3D7_07_v3	885445	885971	Troph_H3K4_peak_801	17	.	1.58162	2.93386	1.78265	PF3D7_0720500		conserved Plasmodium protein, unknown function
Pf3D7_07_v3	889914	890213	Troph_H3K4_peak_802	25	.	1.69021	3.81598	2.59654	PF3D7_0720700	PX1	phosphoinositide-binding protein PX1
Pf3D7_07_v3	890850	891090	Troph_H3K4_peak_803	22	.	1.65736	3.49396	2.29542	intergenic
Pf3D7_07_v3	897139	897431	Troph_H3K4_peak_804	30	.	1.65286	4.32512	3.07389	intergenic
Pf3D7_07_v3	929920	930156	Troph_H3K4_peak_805	20	.	1.58357	3.20131	2.0232	PF3D7_0721600		40S ribosomal protein S5, putative
Pf3D7_07_v3	934083	934361	Troph_H3K4_peak_806	27	.	1.65238	3.9921	2.76113	PF3D7_0721700	PSOP1	secreted ookinete protein, putative
Pf3D7_07_v3	935306	935867	Troph_H3K4_peak_807	130	.	2.4769	14.6797	13.0272	PF3D7_0721700	PSOP1	secreted ookinete protein, putative
Pf3D7_07_v3	939590	939818	Troph_H3K4_peak_808	20	.	1.58882	3.21761	2.03842	PF3D7_0721900		V-type ATPase V0 subunit e, putative
Pf3D7_07_v3	962161	962536	Troph_H3K4_peak_809	88	.	2.11078	10.3213	8.80773	PF3D7_0722700	C3AP1	respiratory chain complex 3 associated protein 1
Pf3D7_07_v3	965842	966207	Troph_H3K4_peak_810	63	.	2.1011	7.71786	6.30804	PF3D7_0722900		conserved protein, unknown function
Pf3D7_07_v3	1050378	1051208	Troph_H3K4_peak_811	74	.	2.13005	8.8546	7.4086	intergenic
Pf3D7_07_v3	1075495	1075861	Troph_H3K4_peak_812	32	.	1.78956	4.55232	3.29479	intergenic
Pf3D7_07_v3	1076271	1078117	Troph_H3K4_peak_813	264	.	3.16922	28.2783	26.4005	intergenic
Pf3D7_07_v3	1081999	1083448	Troph_H3K4_peak_814	269	.	2.86945	28.9578	26.964	intergenic
Pf3D7_07_v3	1085691	1086385	Troph_H3K4_peak_815	350	.	4.04907	37.2546	35.0309	intergenic
Pf3D7_07_v3	1090402	1096034	Troph_H3K4_peak_816	511	.	3.84776	53.5905	51.1933	PF3D7_0726050		conserved Plasmodium protein, unknown function	PF3D7_0726100		Plasmodium exported protein, unknown function
Pf3D7_07_v3	1098242	1098891	Troph_H3K4_peak_817	44	.	1.89742	5.73983	4.42618	PF3D7_0726200	FIKK7.1	serine/threonine protein kinase, FIKK family
Pf3D7_07_v3	1107366	1109600	Troph_H3K4_peak_818	436	.	3.64618	45.7412	43.6849	PF3D7_0726400		conserved Plasmodium membrane protein, unknown function
Pf3D7_07_v3	1115820	1116299	Troph_H3K4_peak_819	55	.	1.90253	6.91762	5.532	intergenic
Pf3D7_07_v3	1122601	1123286	Troph_H3K4_peak_820	28	.	1.71167	4.08104	2.85142	intergenic
Pf3D7_07_v3	1138132	1138402	Troph_H3K4_peak_821	39	.	1.85142	5.28074	3.98505	intergenic
Pf3D7_07_v3	1182209	1182738	Troph_H3K4_peak_822	22	.	1.61152	3.46586	2.27416	intergenic
Pf3D7_07_v3	1188862	1189111	Troph_H3K4_peak_823	33	.	1.69851	4.5911	3.32244	intergenic
Pf3D7_07_v3	1216747	1216980	Troph_H3K4_peak_824	33	.	1.80249	4.62281	3.35704	PF3D7_0728500		EF hand domain-containing protein, putative	PF3D7_0728600		RING zinc finger protein, putative
Pf3D7_07_v3	1280663	1281186	Troph_H3K4_peak_825	21	.	1.56433	3.34654	2.16009	PF3D7_0730000		conserved protein, unknown function
Pf3D7_07_v3	1290727	1291167	Troph_H3K4_peak_826	21	.	1.57323	3.34122	2.15476	intergenic
Pf3D7_07_v3	1293643	1294018	Troph_H3K4_peak_827	128	.	2.52947	14.5363	12.8741	intergenic
Pf3D7_07_v3	1294901	1295281	Troph_H3K4_peak_828	70	.	2.20122	8.49424	7.04404	intergenic
Pf3D7_07_v3	1303108	1303354	Troph_H3K4_peak_829	44	.	1.87823	5.7488	4.41816	intergenic
Pf3D7_07_v3	1304343	1304886	Troph_H3K4_peak_830	27	.	1.65545	3.96631	2.73902	PF3D7_0730400	IMP2	IMP1-like protein, putative	PF3D7_0730500		conserved Plasmodium protein, unknown function
Pf3D7_07_v3	1316368	1316839	Troph_H3K4_peak_831	23	.	1.66053	3.52471	2.32763	intergenic
Pf3D7_07_v3	1317909	1319267	Troph_H3K4_peak_832	364	.	3.42525	38.5317	36.4336	intergenic
Pf3D7_07_v3	1320385	1320862	Troph_H3K4_peak_833	97	.	2.23066	11.2466	9.70754	PF3D7_0730800		Plasmodium exported protein, unknown function
Pf3D7_07_v3	1321501	1321937	Troph_H3K4_peak_834	81	.	2.05515	9.6003	8.11844	intergenic
Pf3D7_07_v3	1323697	1324146	Troph_H3K4_peak_835	112	.	2.53073	12.867	11.2585	PF3D7_0730900	PTP4	EMP1-trafficking protein
Pf3D7_07_v3	1344704	1344954	Troph_H3K4_peak_836	30	.	1.74684	4.31002	3.06016	intergenic
Pf3D7_07_v3	1347994	1348744	Troph_H3K4_peak_837	143	.	2.47521	16.0216	14.3554	PF3D7_0731300	PfG174	Plasmodium exported protein (PHISTb), unknown function
Pf3D7_07_v3	1352440	1352680	Troph_H3K4_peak_838	21	.	1.56052	3.33462	2.15239	intergenic
Pf3D7_07_v3	1379138	1380670	Troph_H3K4_peak_839	17	.	1.51955	2.94151	1.78626	intergenic
Pf3D7_07_v3	1382468	1383543	Troph_H3K4_peak_840	103	.	2.33138	11.9694	10.3886	intergenic
Pf3D7_07_v3	1386212	1386588	Troph_H3K4_peak_841	128	.	2.62948	14.5337	12.867	PF3D7_0732000		stevor
Pf3D7_07_v3	1391117	1392104	Troph_H3K4_peak_842	170	.	2.7129	18.8625	17.0522	PF3D7_0732200	RIF	rifin
Pf3D7_07_v3	1392509	1394293	Troph_H3K4_peak_843	87	.	2.30371	10.2703	8.76799	intergenic
Pf3D7_07_v3	1395549	1398312	Troph_H3K4_peak_844	112	.	2.32459	12.8592	11.2736	PF3D7_0732300	RIF	rifin
Pf3D7_07_v3	1398739	1403821	Troph_H3K4_peak_845	79	.	2.07619	9.42761	7.96672	intergenic
Pf3D7_07_v3	1404295	1405537	Troph_H3K4_peak_846	61	.	2.05745	7.5304	6.13664	intergenic
Pf3D7_07_v3	1409542	1409873	Troph_H3K4_peak_847	94	.	2.39705	10.9792	9.4397	PF3D7_0732700	RIF	rifin	PF3D7_0732800		erythrocyte membrane protein 1 (PfEMP1), exon 2
Pf3D7_07_v3	1414912	1415654	Troph_H3K4_peak_848	127	.	2.51284	14.4574	12.7909	PF3D7_0732900	RIF	rifin
Pf3D7_07_v3	1419777	1426409	Troph_H3K4_peak_849	245	.	3.1101	26.5248	24.5357	intergenic
Pf3D7_07_v3	1427798	1429111	Troph_H3K4_peak_850	460	.	4.24947	48.3198	46.0921	intergenic
Pf3D7_07_v3	1430393	1432231	Troph_H3K4_peak_851	29	.	1.73835	4.20279	2.96128	intergenic
Pf3D7_07_v3	1434239	1438430	Troph_H3K4_peak_852	641	.	5.1947	66.7249	64.1478	intergenic
Pf3D7_07_v3	1442370	1442912	Troph_H3K4_peak_853	144	.	2.72274	16.1645	14.4837	intergenic
Pf3D7_08_v3	5736	5988	Troph_H3K4_peak_854	70	.	2.19649	8.51199	7.06443	intergenic
Pf3D7_08_v3	6412	6932	Troph_H3K4_peak_855	225	.	3.28041	24.4934	22.5731	intergenic
Pf3D7_08_v3	7328	12699	Troph_H3K4_peak_856	380	.	3.67198	39.9812	38.0343	intergenic
Pf3D7_08_v3	17881	19734	Troph_H3K4_peak_857	373	.	4.00603	39.5229	37.3512	intergenic
Pf3D7_08_v3	20150	20509	Troph_H3K4_peak_858	66	.	2.15996	8.11957	6.68713	intergenic
Pf3D7_08_v3	21154	26319	Troph_H3K4_peak_859	160	.	2.63948	17.8354	16.0947	intergenic
Pf3D7_08_v3	33760	39182	Troph_H3K4_peak_860	128	.	2.39829	14.5041	12.8662	intergenic
Pf3D7_08_v3	40762	48683	Troph_H3K4_peak_861	139	.	2.55419	15.6762	13.9636	intergenic
Pf3D7_08_v3	52764	53318	Troph_H3K4_peak_862	105	.	2.43816	12.1563	10.5969	PF3D7_0800400	RIF	rifin
Pf3D7_08_v3	56363	57755	Troph_H3K4_peak_863	142	.	2.53737	15.9433	14.2402	PF3D7_0800500	RIF	rifin
Pf3D7_08_v3	76240	78044	Troph_H3K4_peak_864	61	.	2.08097	7.5772	6.17609	intergenic
Pf3D7_08_v3	78436	81646	Troph_H3K4_peak_865	71	.	2.13907	8.52857	7.10963	PF3D7_0800800		Plasmodium exported protein (hyp7), unknown function
Pf3D7_08_v3	82417	83928	Troph_H3K4_peak_866	68	.	2.10195	8.24176	6.80092	PF3D7_0801000		Plasmodium exported protein (PHISTc)
Pf3D7_08_v3	85173	85603	Troph_H3K4_peak_867	22	.	1.59624	3.47974	2.28872	intergenic
Pf3D7_08_v3	87291	89851	Troph_H3K4_peak_868	32	.	1.74005	4.4967	3.24686	intergenic
Pf3D7_08_v3	91264	99826	Troph_H3K4_peak_869	249	.	2.92343	26.8538	24.9052	intergenic
Pf3D7_08_v3	104572	105125	Troph_H3K4_peak_870	20	.	1.56914	3.24724	2.07398	PF3D7_0801400		conserved Plasmodium protein, unknown function
Pf3D7_08_v3	121811	122055	Troph_H3K4_peak_871	21	.	1.57972	3.37411	2.18982	intergenic
Pf3D7_08_v3	124230	125053	Troph_H3K4_peak_872	60	.	2.06586	7.48032	6.09375	intergenic
Pf3D7_08_v3	142608	143558	Troph_H3K4_peak_873	86	.	2.18469	10.182	8.68376	intergenic
Pf3D7_08_v3	144457	145024	Troph_H3K4_peak_874	50	.	1.9466	6.4155	5.0535	PF3D7_0802000	GDH3	glutamate dehydrogenase, putative
Pf3D7_08_v3	148190	148851	Troph_H3K4_peak_875	25	.	1.57379	3.80139	2.58509	intergenic
Pf3D7_08_v3	168234	168650	Troph_H3K4_peak_876	27	.	1.59585	3.9989	2.76941	intergenic
Pf3D7_08_v3	190258	190542	Troph_H3K4_peak_877	30	.	1.65566	4.32787	3.08346	intergenic
Pf3D7_08_v3	191596	192107	Troph_H3K4_peak_878	14	.	1.50099	2.58739	1.46324	PF3D7_0802800	CNA	serine/threonine protein phosphatase 2B catalytic subunit A
Pf3D7_08_v3	254155	254677	Troph_H3K4_peak_879	19	.	1.54222	3.12108	1.95185	intergenic
Pf3D7_08_v3	272524	272825	Troph_H3K4_peak_880	18	.	1.56092	2.98496	1.82578	intergenic
Pf3D7_08_v3	274536	274943	Troph_H3K4_peak_881	26	.	1.68712	3.84671	2.62588	intergenic
Pf3D7_08_v3	276856	277146	Troph_H3K4_peak_882	25	.	1.58087	3.73364	2.52427	intergenic
Pf3D7_08_v3	283379	283714	Troph_H3K4_peak_883	49	.	1.85127	6.27238	4.92456	intergenic
Pf3D7_08_v3	286344	286636	Troph_H3K4_peak_884	55	.	1.97643	6.93687	5.55455	PF3D7_0805100		conserved protein, unknown function
Pf3D7_08_v3	290889	291710	Troph_H3K4_peak_885	44	.	1.81228	5.72767	4.40752	PF3D7_0805200	GAMER	gamete release protein, putative
Pf3D7_08_v3	295917	296330	Troph_H3K4_peak_886	12	.	1.44285	2.39717	1.29146	intergenic
Pf3D7_08_v3	297430	298572	Troph_H3K4_peak_887	36	.	1.76979	4.96025	3.68562	intergenic
Pf3D7_08_v3	302589	303953	Troph_H3K4_peak_888	25	.	1.60739	3.78769	2.57538	PF3D7_0805400		N-acetyltransferase, GNAT family, putative
Pf3D7_08_v3	311070	311401	Troph_H3K4_peak_889	104	.	2.28503	11.9792	10.4044	PF3D7_0805600	PAP2	phosphatidic acid phosphatase 2
Pf3D7_08_v3	312553	313018	Troph_H3K4_peak_890	119	.	2.22732	13.5759	11.9544	PF3D7_0805700	FIKK8	serine/threonine protein kinase, FIKK family
Pf3D7_08_v3	321070	321833	Troph_H3K4_peak_891	26	.	1.70824	3.87567	2.65781	PF3D7_0805800		conserved Plasmodium protein, unknown function
Pf3D7_08_v3	332075	332801	Troph_H3K4_peak_892	89	.	2.20178	10.4593	8.97166	PF3D7_0806200	DPY19	Dpy-19-like C-mannosyltransferase
Pf3D7_08_v3	337146	337402	Troph_H3K4_peak_893	21	.	1.57244	3.29998	2.11669	PF3D7_0806300	FLP	ferlin-like protein, putative
Pf3D7_08_v3	349326	349683	Troph_H3K4_peak_894	26	.	1.62671	3.88536	2.65916	PF3D7_0806600		kinesin-like protein, putative
Pf3D7_08_v3	350757	351482	Troph_H3K4_peak_895	26	.	1.6348	3.86427	2.64657	intergenic
Pf3D7_08_v3	382682	382940	Troph_H3K4_peak_896	32	.	1.76286	4.50956	3.24713	PF3D7_0807400	COQ10	coenzyme Q-binding protein COQ10 homolog, mitochondrial
Pf3D7_08_v3	397063	397466	Troph_H3K4_peak_897	38	.	1.78803	5.17691	3.88128	intergenic
Pf3D7_08_v3	420244	420643	Troph_H3K4_peak_898	43	.	1.84804	5.62722	4.31381	PF3D7_0808300		ubiquitin regulatory protein, putative
Pf3D7_08_v3	427681	436759	Troph_H3K4_peak_899	96	.	2.2083	11.1533	9.60959	intergenic
Pf3D7_08_v3	437936	438623	Troph_H3K4_peak_900	36	.	1.8387	4.91208	3.62838	intergenic
Pf3D7_08_v3	440184	445916	Troph_H3K4_peak_901	133	.	2.46609	15.0498	13.3765	intergenic
Pf3D7_08_v3	447478	448089	Troph_H3K4_peak_902	82	.	2.27739	9.76917	8.27203	intergenic
Pf3D7_08_v3	450792	456071	Troph_H3K4_peak_903	120	.	2.40876	13.6985	12.0702	PF3D7_0808900	RIF	rifin
Pf3D7_08_v3	457651	458332	Troph_H3K4_peak_904	127	.	2.52832	14.4493	12.7985	intergenic
Pf3D7_08_v3	459096	463440	Troph_H3K4_peak_905	96	.	2.14093	11.2399	9.69553	intergenic
Pf3D7_08_v3	466181	466414	Troph_H3K4_peak_906	13	.	1.46332	2.44992	1.33826	intergenic
Pf3D7_08_v3	501818	503469	Troph_H3K4_peak_907	48	.	1.90641	6.18655	4.85524	PF3D7_0809800		conserved Plasmodium protein, unknown function
Pf3D7_08_v3	505059	505394	Troph_H3K4_peak_908	90	.	2.2479	10.5489	9.02193	intergenic
Pf3D7_08_v3	507079	507477	Troph_H3K4_peak_909	32	.	1.71386	4.53076	3.26359	PF3D7_0809900	JmjC1	JmjC domain-containing protein 1, putative
Pf3D7_08_v3	515496	516231	Troph_H3K4_peak_910	26	.	1.71316	3.86749	2.64468	intergenic
Pf3D7_08_v3	517442	517707	Troph_H3K4_peak_911	34	.	1.76923	4.71555	3.44502	PF3D7_0810000		acyl-CoA binding protein, putative
Pf3D7_08_v3	527186	527459	Troph_H3K4_peak_912	24	.	1.68503	3.66519	2.45707	intergenic
Pf3D7_08_v3	534575	535038	Troph_H3K4_peak_913	28	.	1.70502	4.11246	2.87971	PF3D7_0810500	PPM7	protein phosphatase PPM7, putative
Pf3D7_08_v3	540273	540909	Troph_H3K4_peak_914	32	.	1.77674	4.50906	3.26065	intergenic
Pf3D7_08_v3	555339	555601	Troph_H3K4_peak_915	37	.	1.69164	5.08152	3.78862	intergenic
Pf3D7_08_v3	557134	557414	Troph_H3K4_peak_916	55	.	1.96883	6.92561	5.55424	PF3D7_0811100		mitochondrial carrier protein, putative
Pf3D7_08_v3	589821	590307	Troph_H3K4_peak_917	92	.	2.22318	10.8123	9.27597	intergenic
Pf3D7_08_v3	612496	612783	Troph_H3K4_peak_918	41	.	1.7494	5.49436	4.18893	PF3D7_0812220	YihA3	GTP-binding protein YihA3
Pf3D7_08_v3	620581	620964	Troph_H3K4_peak_919	161	.	2.86639	17.9308	16.1629	PF3D7_0812400	KARalpha	karyopherin alpha
Pf3D7_08_v3	649212	650615	Troph_H3K4_peak_920	53	.	2.0002	6.72746	5.35963	intergenic
Pf3D7_08_v3	652535	652802	Troph_H3K4_peak_921	29	.	1.69291	4.24389	2.99638	intergenic
Pf3D7_08_v3	661074	661736	Troph_H3K4_peak_922	18	.	1.48553	2.96201	1.80667	intergenic
Pf3D7_08_v3	672478	673066	Troph_H3K4_peak_923	308	.	3.36804	32.9682	30.8779	intergenic
Pf3D7_08_v3	677108	677506	Troph_H3K4_peak_924	16	.	1.48538	2.73998	1.60188	PF3D7_0813800	GMD	GDP-mannose 4,6-dehydratase	PF3D7_0813900	RPS16	40S ribosomal protein S16, putative
Pf3D7_08_v3	679881	680116	Troph_H3K4_peak_925	28	.	1.74046	4.13449	2.89661	PF3D7_0814000		60S ribosomal protein L13-2, putative
Pf3D7_08_v3	684103	685398	Troph_H3K4_peak_926	191	.	2.96903	20.9281	19.1054	PF3D7_0814200	ALBA1	DNA/RNA-binding protein Alba 1
Pf3D7_08_v3	687691	688025	Troph_H3K4_peak_927	48	.	1.81648	6.2284	4.8794	intergenic
Pf3D7_08_v3	704942	705698	Troph_H3K4_peak_928	37	.	1.77067	4.99118	3.71186	PF3D7_0814700		conserved Plasmodium protein, unknown function
Pf3D7_08_v3	713684	714247	Troph_H3K4_peak_929	24	.	1.60984	3.68	2.47613	intergenic
Pf3D7_08_v3	776609	777040	Troph_H3K4_peak_930	22	.	1.63219	3.43473	2.24119	PF3D7_0817200		conserved protein, unknown function
Pf3D7_08_v3	793423	793776	Troph_H3K4_peak_931	127	.	2.64678	14.3553	12.7008	PF3D7_0817400		phosphatase, putative
Pf3D7_08_v3	794330	794674	Troph_H3K4_peak_932	29	.	1.7409	4.15919	2.92668	PF3D7_0817400		phosphatase, putative
Pf3D7_08_v3	806660	806910	Troph_H3K4_peak_933	19	.	1.60003	3.08452	1.91742	intergenic
Pf3D7_08_v3	809708	810583	Troph_H3K4_peak_934	24	.	1.62863	3.68215	2.4756	intergenic
Pf3D7_08_v3	816816	817053	Troph_H3K4_peak_935	45	.	1.88461	5.90468	4.56558	PF3D7_0817900	HMGB2	high mobility group protein B2
Pf3D7_08_v3	821586	821908	Troph_H3K4_peak_936	36	.	1.70202	4.9529	3.6659	intergenic
Pf3D7_08_v3	823276	823959	Troph_H3K4_peak_937	103	.	2.48459	11.9645	10.3806	PF3D7_0818100		zinc finger protein, putative
Pf3D7_08_v3	832547	832861	Troph_H3K4_peak_938	51	.	1.86082	6.54983	5.18881	PF3D7_0818300		dynactin subunit 6, putative
Pf3D7_08_v3	842677	843135	Troph_H3K4_peak_939	16	.	1.50375	2.75233	1.61366	intergenic
Pf3D7_08_v3	846787	847079	Troph_H3K4_peak_940	64	.	2.13189	7.90716	6.48785	PF3D7_0818700		DNA helicase, putative
Pf3D7_08_v3	856370	856640	Troph_H3K4_peak_941	19	.	1.51075	3.07714	1.91096	intergenic
Pf3D7_08_v3	857418	859538	Troph_H3K4_peak_942	50	.	1.89784	6.42934	5.08014	PF3D7_0818900	HSP70	heat shock protein 70
Pf3D7_08_v3	860941	862437	Troph_H3K4_peak_943	112	.	2.09907	12.8561	11.2874	intergenic
Pf3D7_08_v3	878631	878928	Troph_H3K4_peak_944	18	.	1.49483	2.98279	1.82455	PF3D7_0819400	PLP4	perforin-like protein 4
Pf3D7_08_v3	885178	885754	Troph_H3K4_peak_945	17	.	1.52925	2.91226	1.76096	PF3D7_0819600		ubiquitin-like protein, putative
Pf3D7_08_v3	888120	888361	Troph_H3K4_peak_946	25	.	1.68173	3.77175	2.559	PF3D7_0819700		conserved Plasmodium protein, unknown function
Pf3D7_08_v3	922294	922538	Troph_H3K4_peak_947	27	.	1.67684	4.0105	2.77831	PF3D7_0820400		conserved Plasmodium protein, unknown function
Pf3D7_08_v3	928439	928690	Troph_H3K4_peak_948	32	.	1.79539	4.51688	3.25271	PF3D7_0820600		conserved protein, unknown function
Pf3D7_08_v3	946698	947265	Troph_H3K4_peak_949	25	.	1.68224	3.77949	2.56529	intergenic
Pf3D7_08_v3	957565	958148	Troph_H3K4_peak_950	63	.	2.00586	7.74809	6.33384	PF3D7_0821200		conserved protein, unknown function	PF3D7_0821300	DHX36	ATP-dependent RNA helicase DHX36, putative
Pf3D7_08_v3	967401	968096	Troph_H3K4_peak_951	15	.	1.52436	2.65859	1.52881	PF3D7_0821500	NEP1	ribosomal RNA small subunit methyltransferase NEP1, putative
Pf3D7_08_v3	981502	981740	Troph_H3K4_peak_952	22	.	1.63403	3.44945	2.2554	PF3D7_0822100	MED7	mediator of RNA polymerase II transcription subunit 7, putative	PF3D7_0822200		phosphorylated CTD interacting factor 1 WW domain-containing protein, putative
Pf3D7_08_v3	990508	990791	Troph_H3K4_peak_953	26	.	1.63696	3.8922	2.66764	PF3D7_0822400		conserved Plasmodium protein, unknown function
Pf3D7_08_v3	994571	995032	Troph_H3K4_peak_954	22	.	1.64057	3.43853	2.24539	intergenic
Pf3D7_08_v3	997722	998535	Troph_H3K4_peak_955	32	.	1.61042	4.45016	3.20295	intergenic
Pf3D7_08_v3	1003543	1004324	Troph_H3K4_peak_956	23	.	1.6685	3.56538	2.36404	intergenic
Pf3D7_08_v3	1007936	1008228	Troph_H3K4_peak_957	10	.	1.4426	2.10345	1.02866	intergenic
Pf3D7_08_v3	1009876	1010134	Troph_H3K4_peak_958	39	.	1.83677	5.23321	3.93756	intergenic
Pf3D7_08_v3	1012076	1012631	Troph_H3K4_peak_959	176	.	2.95473	19.486	17.6936	PF3D7_0823000	VPS15	serine/threonine protein kinase VPS15, putative
Pf3D7_08_v3	1022586	1023822	Troph_H3K4_peak_960	65	.	1.95627	7.98297	6.56443	intergenic
Pf3D7_08_v3	1025869	1026885	Troph_H3K4_peak_961	24	.	1.65303	3.70416	2.49439	intergenic
Pf3D7_08_v3	1048191	1048535	Troph_H3K4_peak_962	27	.	1.61043	3.93391	2.71144	PF3D7_0824000		conserved Plasmodium protein, unknown function
Pf3D7_08_v3	1062435	1062674	Troph_H3K4_peak_963	12	.	1.43604	2.34079	1.24061	PF3D7_0824400	NT2	nucleoside transporter 2
Pf3D7_08_v3	1066808	1067403	Troph_H3K4_peak_964	41	.	1.82938	5.44525	4.13891	intergenic
Pf3D7_08_v3	1093831	1094667	Troph_H3K4_peak_965	40	.	1.77208	5.32604	4.04012	PF3D7_0825200	IF3a	translation initiation factor IF-3	PF3D7_0825300		SAYSvFN domain-containing protein, putative
Pf3D7_08_v3	1113388	1113742	Troph_H3K4_peak_966	31	.	1.63668	4.43422	3.18287	PF3D7_0826100	HEUL	HECT-like E3 ubiquitin ligase, putative
Pf3D7_08_v3	1128623	1128866	Troph_H3K4_peak_967	20	.	1.55673	3.22543	2.04926	intergenic
Pf3D7_08_v3	1155702	1156136	Troph_H3K4_peak_968	22	.	1.61996	3.47754	2.28204	PF3D7_0826600	VAMP7	SNARE protein, putative
Pf3D7_08_v3	1159296	1159570	Troph_H3K4_peak_969	20	.	1.62912	3.22411	2.04412	PF3D7_0826700	RACK1	receptor for activated c kinase
Pf3D7_08_v3	1160157	1160809	Troph_H3K4_peak_970	32	.	1.65753	4.50933	3.25934	PF3D7_0826700	RACK1	receptor for activated c kinase
Pf3D7_08_v3	1165489	1165740	Troph_H3K4_peak_971	29	.	1.69686	4.23675	2.99049	intergenic
Pf3D7_08_v3	1166584	1166914	Troph_H3K4_peak_972	15	.	1.52024	2.72921	1.59147	PF3D7_0827000	DBP10	ATP-dependent RNA helicase DBP10, putative
Pf3D7_08_v3	1179277	1179504	Troph_H3K4_peak_973	20	.	1.59616	3.25882	2.07715	intergenic
Pf3D7_08_v3	1184250	1185102	Troph_H3K4_peak_974	23	.	1.6325	3.5003	2.30725	PF3D7_0827400		conserved protein, unknown function
Pf3D7_08_v3	1206927	1207287	Troph_H3K4_peak_975	30	.	1.63429	4.34631	3.09593	PF3D7_0827900	PDI8	protein disulfide-isomerase
Pf3D7_08_v3	1232150	1232463	Troph_H3K4_peak_976	48	.	1.94466	6.15353	4.81252	PF3D7_0828700		conserved protein, unknown function
Pf3D7_08_v3	1232945	1233579	Troph_H3K4_peak_977	47	.	1.94021	6.12647	4.79581	PF3D7_0828700		conserved protein, unknown function
Pf3D7_08_v3	1236033	1236454	Troph_H3K4_peak_978	57	.	1.99864	7.16195	5.77711	PF3D7_0828800	GAMA	GPI-anchored micronemal antigen
Pf3D7_08_v3	1239653	1240103	Troph_H3K4_peak_979	18	.	1.58064	2.98156	1.82079	intergenic
Pf3D7_08_v3	1240778	1241353	Troph_H3K4_peak_980	139	.	2.72601	15.6096	13.9163	PF3D7_0828900		conserved protein, unknown function
Pf3D7_08_v3	1260072	1260461	Troph_H3K4_peak_981	136	.	2.65633	15.2877	13.6102	PF3D7_0829500		conserved Plasmodium protein, unknown function
Pf3D7_08_v3	1267495	1267867	Troph_H3K4_peak_982	83	.	2.24755	9.83027	8.33799	intergenic
Pf3D7_08_v3	1269222	1269544	Troph_H3K4_peak_983	24	.	1.6062	3.70238	2.49233	PF3D7_0829600	ETRAMP8	early transcribed membrane protein 8
Pf3D7_08_v3	1288805	1289129	Troph_H3K4_peak_984	12	.	1.46328	2.34337	1.24303	intergenic
Pf3D7_08_v3	1291803	1292347	Troph_H3K4_peak_985	93	.	2.38782	10.8747	9.33981	intergenic
Pf3D7_08_v3	1293147	1293670	Troph_H3K4_peak_986	152	.	2.58257	16.9701	15.2449	PF3D7_0830400		CRA domain-containing protein, putative
Pf3D7_08_v3	1294347	1295082	Troph_H3K4_peak_987	45	.	1.88446	5.8888	4.57683	PF3D7_0830500	TryThrA	sporozoite and liver stage tryptophan-rich protein, putative
Pf3D7_08_v3	1296298	1296824	Troph_H3K4_peak_988	13	.	1.50795	2.49582	1.37979	PF3D7_0830500	TryThrA	sporozoite and liver stage tryptophan-rich protein, putative
Pf3D7_08_v3	1299498	1299793	Troph_H3K4_peak_989	108	.	2.50854	12.4085	10.8155	intergenic
Pf3D7_08_v3	1305639	1305911	Troph_H3K4_peak_990	19	.	1.60049	3.06808	1.90229	PF3D7_0830700		Plasmodium exported protein (hyp9), unknown function
Pf3D7_08_v3	1309172	1309519	Troph_H3K4_peak_991	82	.	2.2419	9.74437	8.24904	PF3D7_0830800	SURF8.2	surface-associated interspersed protein 8.2 (SURFIN 8.2)
Pf3D7_08_v3	1330651	1331086	Troph_H3K4_peak_992	21	.	1.5845	3.3169	2.13143	intergenic
Pf3D7_08_v3	1336073	1336709	Troph_H3K4_peak_993	59	.	1.90529	7.30928	5.93574	intergenic
Pf3D7_08_v3	1340863	1341405	Troph_H3K4_peak_994	70	.	2.04982	8.53022	7.08562	intergenic
Pf3D7_08_v3	1346063	1346674	Troph_H3K4_peak_995	25	.	1.65644	3.79479	2.5798	intergenic
Pf3D7_08_v3	1349687	1350165	Troph_H3K4_peak_996	92	.	2.26176	10.8128	9.28156	intergenic
Pf3D7_08_v3	1350644	1351154	Troph_H3K4_peak_997	106	.	2.45769	12.2055	10.6321	intergenic
Pf3D7_08_v3	1351918	1352189	Troph_H3K4_peak_998	61	.	2.09305	7.56009	6.14818	PF3D7_0831500		Plasmodium exported protein (PHIST), unknown function
Pf3D7_08_v3	1356941	1357540	Troph_H3K4_peak_999	104	.	2.46913	12.0561	10.4768	PF3D7_0831600	CLAG8	cytoadherence linked asexual protein 8
Pf3D7_08_v3	1360781	1361441	Troph_H3K4_peak_1000	58	.	1.92379	7.26134	5.89487	intergenic
Pf3D7_08_v3	1369384	1369895	Troph_H3K4_peak_1001	165	.	2.67285	18.3609	16.5851	intergenic
Pf3D7_08_v3	1373784	1374217	Troph_H3K4_peak_1002	19	.	1.30232	3.09573	1.93009	PF3D7_0831800	HRP2	histidine-rich protein II
Pf3D7_08_v3	1377994	1378282	Troph_H3K4_peak_1003	50	.	1.97398	6.42046	5.06623	intergenic
Pf3D7_08_v3	1380611	1388521	Troph_H3K4_peak_1004	68	.	2.02771	8.22681	6.81365	intergenic
Pf3D7_08_v3	1391230	1391470	Troph_H3K4_peak_1005	14	.	1.52942	2.55282	1.42985	PF3D7_0832200		Plasmodium exported protein (PHISTa-like), unknown function
Pf3D7_08_v3	1392718	1392999	Troph_H3K4_peak_1006	17	.	1.51688	2.89744	1.74499	intergenic
Pf3D7_08_v3	1393412	1394835	Troph_H3K4_peak_1007	43	.	1.86047	5.61514	4.30758	intergenic
Pf3D7_08_v3	1395264	1400433	Troph_H3K4_peak_1008	63	.	1.97371	7.68841	6.30817	PF3D7_0832300		Plasmodium exported protein (PHISTa-like), unknown function
Pf3D7_08_v3	1400923	1409521	Troph_H3K4_peak_1009	91	.	2.18122	10.668	9.16961	PF3D7_0832600		stevor
Pf3D7_08_v3	1410353	1410628	Troph_H3K4_peak_1010	31	.	1.77192	4.38171	3.13149	PF3D7_0832800	RIF	rifin
Pf3D7_08_v3	1411084	1412180	Troph_H3K4_peak_1011	200	.	2.94174	21.9677	20.0638	PF3D7_0832800	RIF	rifin
Pf3D7_08_v3	1414317	1415408	Troph_H3K4_peak_1012	104	.	2.35544	12.0216	10.4613	PF3D7_0832900		stevor
Pf3D7_08_v3	1417690	1418644	Troph_H3K4_peak_1013	148	.	2.66139	16.5624	14.8176	PF3D7_0833000	RIF	rifin
Pf3D7_08_v3	1420949	1421184	Troph_H3K4_peak_1014	46	.	1.94622	6.00501	4.6735	PF3D7_0833100	RIF	rifin
Pf3D7_08_v3	1421630	1422588	Troph_H3K4_peak_1015	38	.	1.86913	5.18029	3.88184	intergenic
Pf3D7_08_v3	1427474	1428041	Troph_H3K4_peak_1016	195	.	3.11057	21.4599	19.5793	PF3D7_0833200	RIF	rifin
Pf3D7_08_v3	1429194	1429531	Troph_H3K4_peak_1017	37	.	1.85361	5.08621	3.79676	intergenic
Pf3D7_08_v3	1433013	1433931	Troph_H3K4_peak_1018	65	.	2.05698	7.94388	6.52255	PF3D7_0833400	RIF	rifin
Pf3D7_08_v3	1437938	1443659	Troph_H3K4_peak_1019	150	.	2.57603	16.7667	15.0451	intergenic
Pf3D7_08_v3	1444245	1444712	Troph_H3K4_peak_1020	537	.	4.81418	56.0999	53.7017	intergenic
Pf3D7_08_v3	1445583	1447744	Troph_H3K4_peak_1021	200	.	2.94533	21.8615	20.0793	intergenic
Pf3D7_08_v3	1459912	1463694	Troph_H3K4_peak_1022	347	.	3.79431	36.769	34.7133	intergenic
Pf3D7_09_v3	6757	10737	Troph_H3K4_peak_1023	503	.	4.24345	52.6506	50.362	intergenic
Pf3D7_09_v3	11231	12846	Troph_H3K4_peak_1024	16	.	1.56624	2.82724	1.68125	intergenic
Pf3D7_09_v3	13290	16016	Troph_H3K4_peak_1025	26	.	1.64023	3.88448	2.67093	intergenic
Pf3D7_09_v3	17146	17951	Troph_H3K4_peak_1026	461	.	4.58571	48.558	46.1722	intergenic
Pf3D7_09_v3	18834	19213	Troph_H3K4_peak_1027	271	.	3.57437	29.1663	27.1266	intergenic
Pf3D7_09_v3	19881	25604	Troph_H3K4_peak_1028	231	.	3.09297	25.0786	23.1127	intergenic
Pf3D7_09_v3	29800	30662	Troph_H3K4_peak_1029	131	.	2.64228	14.8356	13.1448	PF3D7_0900200	RIF	rifin
Pf3D7_09_v3	33554	34311	Troph_H3K4_peak_1030	278	.	3.49331	29.9795	27.8778	PF3D7_0900300	RIF	rifin
Pf3D7_09_v3	42986	43632	Troph_H3K4_peak_1031	153	.	2.69659	17.0646	15.3058	PF3D7_0900500	RIF	rifin
Pf3D7_09_v3	45905	46837	Troph_H3K4_peak_1032	90	.	2.21456	10.5419	9.01711	PF3D7_0900600	RIF	rifin
Pf3D7_09_v3	49648	50403	Troph_H3K4_peak_1033	79	.	2.20437	9.40593	7.91603	PF3D7_0900700	RIF	rifin
Pf3D7_09_v3	55112	55666	Troph_H3K4_peak_1034	132	.	2.60806	14.9576	13.2855	PF3D7_0900900		stevor
Pf3D7_09_v3	57775	59771	Troph_H3K4_peak_1035	54	.	1.95898	6.82222	5.47175	PF3D7_0901000	RIF	rifin
Pf3D7_09_v3	64219	64538	Troph_H3K4_peak_1036	54	.	2.03159	6.82764	5.45641	PF3D7_0901200		Plasmodium exported protein, unknown function, fragment
Pf3D7_09_v3	67726	69177	Troph_H3K4_peak_1037	139	.	2.61153	15.6191	13.9237	intergenic
Pf3D7_09_v3	70679	74008	Troph_H3K4_peak_1038	102	.	2.29213	11.7711	10.2498	intergenic
Pf3D7_09_v3	74640	77167	Troph_H3K4_peak_1039	130	.	2.35797	14.6296	13.0228	intergenic
Pf3D7_09_v3	77829	78793	Troph_H3K4_peak_1040	21	.	1.57177	3.367	2.1813	PF3D7_0901600		stevor
Pf3D7_09_v3	83469	83755	Troph_H3K4_peak_1041	27	.	1.67403	3.94531	2.71991	PF3D7_0901800		Plasmodium exported protein, unknown function
Pf3D7_09_v3	111968	112244	Troph_H3K4_peak_1042	54	.	1.91442	6.78278	5.41047	intergenic
Pf3D7_09_v3	124300	124689	Troph_H3K4_peak_1043	101	.	2.19239	11.6644	10.1017	intergenic
Pf3D7_09_v3	125359	125790	Troph_H3K4_peak_1044	68	.	2.13408	8.24711	6.83195	intergenic
Pf3D7_09_v3	127546	127778	Troph_H3K4_peak_1045	11	.	1.47116	2.24802	1.15731	PF3D7_0902900		early transcribed membrane protein, putative
Pf3D7_09_v3	129334	130654	Troph_H3K4_peak_1046	39	.	1.78275	5.20121	3.90587	PF3D7_0903100	RER1	protein RER1, putative
Pf3D7_09_v3	133681	133988	Troph_H3K4_peak_1047	11	.	1.4644	2.29456	1.1997	PF3D7_0903200	RAB7	ras-related protein RAB7
Pf3D7_09_v3	136295	136870	Troph_H3K4_peak_1048	187	.	2.91368	20.5835	18.7759	intergenic
Pf3D7_09_v3	167658	168084	Troph_H3K4_peak_1049	14	.	1.4983	2.56452	1.44511	PF3D7_0903600		conserved protein, unknown function
Pf3D7_09_v3	176511	177137	Troph_H3K4_peak_1050	12	.	1.45381	2.33229	1.23323	intergenic
Pf3D7_09_v3	191628	192841	Troph_H3K4_peak_1051	27	.	1.62445	3.95622	2.73053	intergenic
Pf3D7_09_v3	214440	215394	Troph_H3K4_peak_1052	1024	.	6.53111	105.369	102.416	intergenic
Pf3D7_09_v3	233678	233952	Troph_H3K4_peak_1053	42	.	1.89692	5.53195	4.21542	PF3D7_0905000	ATPTG4	ATP synthase-associated protein, putative
Pf3D7_09_v3	250093	250418	Troph_H3K4_peak_1054	31	.	1.69206	4.44987	3.19961	intergenic
Pf3D7_09_v3	263383	263620	Troph_H3K4_peak_1055	29	.	1.66632	4.15005	2.90848	intergenic
Pf3D7_09_v3	270849	271234	Troph_H3K4_peak_1056	22	.	1.6086	3.43573	2.24411	PF3D7_0905400	RhopH3	high molecular weight rhoptry protein 3
Pf3D7_09_v3	275294	276370	Troph_H3K4_peak_1057	249	.	3.20655	26.8229	24.9618	PF3D7_0905500		conserved protein, unknown function
Pf3D7_09_v3	277574	277981	Troph_H3K4_peak_1058	51	.	1.99386	6.51036	5.14746	intergenic
Pf3D7_09_v3	317263	317549	Troph_H3K4_peak_1059	15	.	1.54539	2.67094	1.53869	PF3D7_0906500		arginase
Pf3D7_09_v3	328197	329764	Troph_H3K4_peak_1060	131	.	2.42194	14.7973	13.1753	PF3D7_0906700	LRR9	leucine-rich repeat protein
Pf3D7_09_v3	330652	330923	Troph_H3K4_peak_1061	35	.	1.73184	4.82877	3.55018	intergenic
Pf3D7_09_v3	338471	338882	Troph_H3K4_peak_1062	72	.	2.02785	8.67698	7.23051	PF3D7_0907100		conserved Plasmodium protein, unknown function
Pf3D7_09_v3	356097	356429	Troph_H3K4_peak_1063	21	.	1.64078	3.35097	2.16157	PF3D7_0907500		conserved protein, unknown function
Pf3D7_09_v3	358465	359234	Troph_H3K4_peak_1064	19	.	1.61558	3.1537	1.98187	PF3D7_0907600		translation initiation factor SUI1, putative
Pf3D7_09_v3	372857	373560	Troph_H3K4_peak_1065	85	.	2.31378	10.106	8.58844	PF3D7_0908100		apicoplast integral membrane protein, putative
Pf3D7_09_v3	382116	383033	Troph_H3K4_peak_1066	36	.	1.74274	4.93911	3.67113	PF3D7_0908300		conserved protein, unknown function
Pf3D7_09_v3	397939	398552	Troph_H3K4_peak_1067	46	.	1.87803	5.96123	4.62427	PF3D7_0908600		ribosomal RNA methyltransferase, putative
Pf3D7_09_v3	399035	399309	Troph_H3K4_peak_1068	26	.	1.67212	3.89749	2.67346	PF3D7_0908600		ribosomal RNA methyltransferase, putative
Pf3D7_09_v3	489185	489472	Troph_H3K4_peak_1069	28	.	1.72793	4.11319	2.87852	PF3D7_0910600	YKT6.1	SNARE protein
Pf3D7_09_v3	498925	499176	Troph_H3K4_peak_1070	60	.	2.08861	7.40558	6.00186	PF3D7_0911000		phosphatidylinositol N-acetylglucosaminyltransferase, putative
Pf3D7_09_v3	499717	499976	Troph_H3K4_peak_1071	18	.	1.59636	3.00215	1.83837	PF3D7_0911000		phosphatidylinositol N-acetylglucosaminyltransferase, putative
Pf3D7_09_v3	503887	504776	Troph_H3K4_peak_1072	63	.	2.07457	7.80797	6.39522	PF3D7_0911100		START domain-containing protein, putative
Pf3D7_09_v3	507616	508027	Troph_H3K4_peak_1073	39	.	1.7937	5.27945	3.98928	intergenic
Pf3D7_09_v3	510772	511819	Troph_H3K4_peak_1074	142	.	2.57103	15.8678	14.218	PF3D7_0911300	CRMP1	cysteine repeat modular protein 1
Pf3D7_09_v3	530068	531028	Troph_H3K4_peak_1075	40	.	1.84564	5.33266	4.03959	intergenic
Pf3D7_09_v3	540254	540793	Troph_H3K4_peak_1076	80	.	2.27595	9.5611	8.07396	PF3D7_0912000		conserved Plasmodium protein, unknown function
Pf3D7_09_v3	551465	551780	Troph_H3K4_peak_1077	16	.	1.48003	2.77043	1.63163	PF3D7_0912400		alkaline phosphatase, putative
Pf3D7_09_v3	554362	554892	Troph_H3K4_peak_1078	103	.	2.47831	11.9678	10.3911	intergenic
Pf3D7_09_v3	558882	559359	Troph_H3K4_peak_1079	42	.	1.86604	5.57083	4.26543	PF3D7_0912600		conserved Plasmodium protein, unknown function
Pf3D7_09_v3	583238	583528	Troph_H3K4_peak_1080	38	.	1.8349	5.15408	3.85602	intergenic
Pf3D7_09_v3	605911	606316	Troph_H3K4_peak_1081	62	.	2.06326	7.6243	6.22889	intergenic
Pf3D7_09_v3	616232	617123	Troph_H3K4_peak_1082	64	.	2.02275	7.8081	6.40186	intergenic
Pf3D7_09_v3	631582	632250	Troph_H3K4_peak_1083	75	.	2.01949	8.98054	7.5426	PF3D7_0914800		GINS complex subunit Psf3, putative
Pf3D7_09_v3	658925	659168	Troph_H3K4_peak_1084	15	.	1.51497	2.72796	1.59231	PF3D7_0915600		conserved Plasmodium protein, unknown function
Pf3D7_09_v3	667634	668102	Troph_H3K4_peak_1085	31	.	1.67343	4.39485	3.14064	intergenic
Pf3D7_09_v3	691583	691867	Troph_H3K4_peak_1086	52	.	2.01681	6.66223	5.29503	PF3D7_0916500	UFD1	ubiquitin fusion degradation protein 1
Pf3D7_09_v3	695774	696059	Troph_H3K4_peak_1087	18	.	1.57287	2.97746	1.81892	PF3D7_0916700	HoMu	RNA-binding protein musashi, putative
Pf3D7_09_v3	700557	701792	Troph_H3K4_peak_1088	163	.	2.64308	18.0613	16.3202	intergenic
Pf3D7_09_v3	715664	716149	Troph_H3K4_peak_1089	190	.	3.00614	20.892	19.0485	PF3D7_0917200		conserved protein, unknown function
Pf3D7_09_v3	735702	737108	Troph_H3K4_peak_1090	95	.	2.33606	11.0415	9.5267	PF3D7_0917900	BIP	heat shock protein 70
Pf3D7_09_v3	738475	738971	Troph_H3K4_peak_1091	22	.	1.52965	3.47454	2.28279	intergenic
Pf3D7_09_v3	739491	739842	Troph_H3K4_peak_1092	21	.	1.51913	3.34482	2.16462	intergenic
Pf3D7_09_v3	741231	741557	Troph_H3K4_peak_1093	25	.	1.66504	3.75555	2.54282	PF3D7_0918000	GAP50	glideosome-associated protein 50
Pf3D7_09_v3	744668	745258	Troph_H3K4_peak_1094	57	.	2.05515	7.10804	5.72469	intergenic
Pf3D7_09_v3	746810	747039	Troph_H3K4_peak_1095	30	.	1.7229	4.27334	3.02448	PF3D7_0918100		cytochrome b5-like heme/steroid binding protein, putative
Pf3D7_09_v3	754454	755390	Troph_H3K4_peak_1096	61	.	1.99706	7.50422	6.11131	PF3D7_0918400		conserved Plasmodium protein, unknown function
Pf3D7_09_v3	768683	769049	Troph_H3K4_peak_1097	19	.	1.6048	3.11992	1.94935	PF3D7_0918700		conserved Plasmodium protein, unknown function
Pf3D7_09_v3	773491	773805	Troph_H3K4_peak_1098	14	.	1.44696	2.62663	1.4984	intergenic
Pf3D7_09_v3	776448	776870	Troph_H3K4_peak_1099	55	.	2.01304	6.92784	5.55092	intergenic
Pf3D7_09_v3	787745	788090	Troph_H3K4_peak_1100	53	.	1.89182	6.74249	5.36912	PF3D7_0919200		PPPDE peptidase, putative
Pf3D7_09_v3	791217	791534	Troph_H3K4_peak_1101	78	.	2.23767	9.33096	7.8599	intergenic
Pf3D7_09_v3	792400	793310	Troph_H3K4_peak_1102	18	.	1.58176	3.01149	1.85365	PF3D7_0919300	TrxL1	thioredoxin-like protein 1, putative
Pf3D7_09_v3	793805	794593	Troph_H3K4_peak_1103	26	.	1.64553	3.82713	2.61639	intergenic
Pf3D7_09_v3	814309	815432	Troph_H3K4_peak_1104	417	.	4.0552	43.888	41.7548	intergenic
Pf3D7_09_v3	821045	821597	Troph_H3K4_peak_1105	31	.	1.7352	4.40662	3.16232	intergenic
Pf3D7_09_v3	853405	854055	Troph_H3K4_peak_1106	61	.	1.95281	7.57144	6.16945	intergenic
Pf3D7_09_v3	889698	890406	Troph_H3K4_peak_1107	25	.	1.65651	3.76488	2.55554	PF3D7_0922000		dynein intermediate chain, putative
Pf3D7_09_v3	901539	902401	Troph_H3K4_peak_1108	49	.	1.94221	6.25554	4.91796	PF3D7_0922200	SAMS	S-adenosylmethionine synthetase
Pf3D7_09_v3	904002	904534	Troph_H3K4_peak_1109	59	.	1.87576	7.40181	5.99998	intergenic
Pf3D7_09_v3	905976	906248	Troph_H3K4_peak_1110	43	.	1.84634	5.67782	4.35539	PF3D7_0922300		conserved protein, unknown function
Pf3D7_09_v3	912363	912674	Troph_H3K4_peak_1111	77	.	2.22048	9.20636	7.73175	PF3D7_0922500	PGK	phosphoglycerate kinase
Pf3D7_09_v3	923500	924079	Troph_H3K4_peak_1112	32	.	1.71073	4.50937	3.24931	intergenic
Pf3D7_09_v3	925019	925269	Troph_H3K4_peak_1113	51	.	1.91528	6.46722	5.10541	intergenic
Pf3D7_09_v3	937648	938101	Troph_H3K4_peak_1114	38	.	1.82614	5.09498	3.80174	intergenic
Pf3D7_09_v3	961887	962367	Troph_H3K4_peak_1115	46	.	1.78079	5.99877	4.66161	PF3D7_0923800	TRXR	thioredoxin reductase
Pf3D7_09_v3	986981	987208	Troph_H3K4_peak_1116	14	.	1.51878	2.53616	1.41764	PF3D7_0924400		conserved Plasmodium protein, unknown function
Pf3D7_09_v3	998962	999292	Troph_H3K4_peak_1117	58	.	2.0243	7.2019	5.80861	PF3D7_0924600		conserved Plasmodium protein, unknown function
Pf3D7_09_v3	1027288	1027676	Troph_H3K4_peak_1118	47	.	1.83377	6.05847	4.72565	PF3D7_0925600		zinc binding protein (Yippee), putative	PF3D7_0925700	HDAC1	histone deacetylase 1
Pf3D7_09_v3	1028518	1029359	Troph_H3K4_peak_1119	48	.	1.86285	6.17281	4.83051	PF3D7_0925700	HDAC1	histone deacetylase 1
Pf3D7_09_v3	1031264	1031609	Troph_H3K4_peak_1120	32	.	1.76153	4.4849	3.22861	intergenic
Pf3D7_09_v3	1036012	1036277	Troph_H3K4_peak_1121	30	.	1.61399	4.31511	3.06428	intergenic
Pf3D7_09_v3	1038894	1040263	Troph_H3K4_peak_1122	52	.	1.90091	6.62015	5.27528	PF3D7_0925900	LCN	lipocalin
Pf3D7_09_v3	1041151	1041500	Troph_H3K4_peak_1123	15	.	1.46972	2.72921	1.59096	intergenic
Pf3D7_09_v3	1042390	1042846	Troph_H3K4_peak_1124	31	.	1.75601	4.43528	3.17507	PF3D7_0926000		protein kinase, putative
Pf3D7_09_v3	1044826	1045111	Troph_H3K4_peak_1125	63	.	2.03808	7.7322	6.31329	intergenic
Pf3D7_09_v3	1056250	1056653	Troph_H3K4_peak_1126	25	.	1.60911	3.76981	2.55295	intergenic
Pf3D7_09_v3	1061670	1061978	Troph_H3K4_peak_1127	21	.	1.60258	3.32003	2.13896	PF3D7_0926200		conserved Plasmodium protein, unknown function
Pf3D7_09_v3	1064790	1065018	Troph_H3K4_peak_1128	16	.	1.56981	2.81815	1.67154	PF3D7_0926300		protein kinase, putative
Pf3D7_09_v3	1084446	1084706	Troph_H3K4_peak_1129	35	.	1.74225	4.78507	3.51092	PF3D7_0926600		conserved Plasmodium membrane protein, unknown function
Pf3D7_09_v3	1121789	1122167	Troph_H3K4_peak_1130	55	.	2.01055	6.93895	5.56131	PF3D7_0927600		RNA-binding protein, putative
Pf3D7_09_v3	1133383	1133670	Troph_H3K4_peak_1131	35	.	1.79308	4.85319	3.57609	intergenic
Pf3D7_09_v3	1135073	1136358	Troph_H3K4_peak_1132	37	.	1.80992	5.08734	3.79566	PF3D7_0928000	COX6B	cytochrome c oxidase subunit 6B, putative	PF3D7_0928100		conserved Plasmodium protein, unknown function
Pf3D7_09_v3	1148144	1148539	Troph_H3K4_peak_1133	73	.	2.0989	8.81754	7.36025	PF3D7_0928600		conserved Plasmodium protein, unknown function
Pf3D7_09_v3	1149827	1150288	Troph_H3K4_peak_1134	225	.	3.1924	24.5185	22.5684	PF3D7_0928700		conserved Plasmodium protein, unknown function
Pf3D7_09_v3	1150917	1151266	Troph_H3K4_peak_1135	44	.	1.80862	5.80103	4.47401	intergenic
Pf3D7_09_v3	1158167	1158533	Troph_H3K4_peak_1136	11	.	1.42687	2.21833	1.13113	intergenic
Pf3D7_09_v3	1167904	1168446	Troph_H3K4_peak_1137	28	.	1.69826	4.07374	2.83492	intergenic
Pf3D7_09_v3	1173889	1174406	Troph_H3K4_peak_1138	19	.	1.60536	3.09666	1.92868	PF3D7_0929400	RhopH2	high molecular weight rhoptry protein 2
Pf3D7_09_v3	1183461	1183765	Troph_H3K4_peak_1139	99	.	2.3308	11.5085	9.94692	intergenic
Pf3D7_09_v3	1200715	1201190	Troph_H3K4_peak_1140	99	.	2.35302	11.5001	9.94322	PF3D7_0930300	MSP1	merozoite surface protein 1
Pf3D7_09_v3	1201923	1202177	Troph_H3K4_peak_1141	28	.	1.66987	4.07409	2.83601	PF3D7_0930300	MSP1	merozoite surface protein 1
Pf3D7_09_v3	1203786	1204737	Troph_H3K4_peak_1142	138	.	2.26896	15.5029	13.8618	intergenic
Pf3D7_09_v3	1211045	1211655	Troph_H3K4_peak_1143	29	.	1.67187	4.14071	2.90639	PF3D7_0930500	DGK1	diacylglycerol kinase, putative
Pf3D7_09_v3	1236902	1237138	Troph_H3K4_peak_1144	30	.	1.64176	4.26522	3.01464	intergenic
Pf3D7_09_v3	1240108	1240512	Troph_H3K4_peak_1145	47	.	1.89873	6.06667	4.72436	intergenic
Pf3D7_09_v3	1245767	1246362	Troph_H3K4_peak_1146	23	.	1.60271	3.56175	2.35775	PF3D7_0930900	NFU1	NifU-like protein, putative
Pf3D7_09_v3	1247371	1247872	Troph_H3K4_peak_1147	21	.	1.55244	3.38437	2.199	PF3D7_0930900	NFU1	NifU-like protein, putative	PF3D7_0931000		elongation factor Tu, putative
Pf3D7_09_v3	1250171	1250416	Troph_H3K4_peak_1148	22	.	1.54352	3.46334	2.26671	intergenic
Pf3D7_09_v3	1256561	1256840	Troph_H3K4_peak_1149	12	.	1.49021	2.33842	1.23824	intergenic
Pf3D7_09_v3	1260164	1261171	Troph_H3K4_peak_1150	286	.	3.39763	30.5955	28.6248	PF3D7_0931300		conserved Plasmodium protein, unknown function
Pf3D7_09_v3	1265822	1266072	Troph_H3K4_peak_1151	37	.	1.8194	4.99379	3.70454	intergenic
Pf3D7_09_v3	1267845	1268356	Troph_H3K4_peak_1152	38	.	1.86891	5.13707	3.83647	PF3D7_0931600		conserved protein, unknown function
Pf3D7_09_v3	1273124	1273362	Troph_H3K4_peak_1153	25	.	1.64587	3.75586	2.54149	PF3D7_0931800		proteasome subunit beta type-6, putative
Pf3D7_09_v3	1283224	1284018	Troph_H3K4_peak_1154	179	.	2.86184	19.6994	17.9681	intergenic
Pf3D7_09_v3	1303673	1304406	Troph_H3K4_peak_1155	22	.	1.59521	3.44084	2.25327	intergenic
Pf3D7_09_v3	1306146	1306382	Troph_H3K4_peak_1156	37	.	1.70754	5.02263	3.73747	intergenic
Pf3D7_09_v3	1340451	1340694	Troph_H3K4_peak_1157	29	.	1.66808	4.22702	2.97689	PF3D7_0934000		histidine--tRNA ligase, putative
Pf3D7_09_v3	1349833	1350283	Troph_H3K4_peak_1158	15	.	1.4755	2.65145	1.52103	PF3D7_0934400	ApiAP2	AP2 domain transcription factor, putative	PF3D7_0934500		V-type proton ATPase subunit E, putative
Pf3D7_09_v3	1350850	1351202	Troph_H3K4_peak_1159	21	.	1.52715	3.33421	2.14878	PF3D7_0934500		V-type proton ATPase subunit E, putative
Pf3D7_09_v3	1354406	1354763	Troph_H3K4_peak_1160	31	.	1.77542	4.38267	3.12998	PF3D7_0934600		conserved Plasmodium protein, unknown function
Pf3D7_09_v3	1360806	1362452	Troph_H3K4_peak_1161	45	.	1.89019	5.84518	4.52483	PF3D7_0934800	PKAc	cAMP-dependent protein kinase catalytic subunit
Pf3D7_09_v3	1364286	1365319	Troph_H3K4_peak_1162	42	.	1.82823	5.59457	4.28361	PF3D7_0934900		conserved Plasmodium protein, unknown function
Pf3D7_09_v3	1373540	1374582	Troph_H3K4_peak_1163	170	.	2.81631	18.7752	17.0633	intergenic
Pf3D7_09_v3	1375690	1376783	Troph_H3K4_peak_1164	90	.	2.23571	10.5533	9.08194	intergenic
Pf3D7_09_v3	1380638	1382435	Troph_H3K4_peak_1165	49	.	1.93301	6.3047	4.97167	intergenic
Pf3D7_09_v3	1382946	1386614	Troph_H3K4_peak_1166	154	.	2.81986	17.1762	15.4456	intergenic
Pf3D7_09_v3	1387154	1388466	Troph_H3K4_peak_1167	58	.	2.0174	7.21836	5.84022	intergenic
Pf3D7_09_v3	1388969	1394195	Troph_H3K4_peak_1168	133	.	2.50942	14.9788	13.3605	intergenic
Pf3D7_09_v3	1396004	1396937	Troph_H3K4_peak_1169	143	.	2.6558	16.0336	14.3308	intergenic
Pf3D7_09_v3	1403951	1404190	Troph_H3K4_peak_1170	47	.	1.95579	6.14848	4.79881	PF3D7_0935600	GIG	gametocytogenesis-implicated protein
Pf3D7_09_v3	1408546	1409159	Troph_H3K4_peak_1171	35	.	1.74834	4.78557	3.51053	PF3D7_0935700		Plasmodium exported protein, unknown function
Pf3D7_09_v3	1412505	1413207	Troph_H3K4_peak_1172	39	.	1.84174	5.21887	3.92758	PF3D7_0935800	CLAG9	cytoadherence linked asexual protein 9
Pf3D7_09_v3	1424482	1425403	Troph_H3K4_peak_1173	53	.	1.98329	6.71388	5.36201	intergenic
Pf3D7_09_v3	1428735	1429296	Troph_H3K4_peak_1174	170	.	2.94615	18.8595	17.0709	PF3D7_0936100	ETRAMP9	early transcribed membrane protein
Pf3D7_09_v3	1435081	1435594	Troph_H3K4_peak_1175	81	.	2.14047	9.62908	8.13673	PF3D7_0936300	REX3	ring-exported protein 3
Pf3D7_09_v3	1444244	1444996	Troph_H3K4_peak_1176	49	.	1.83382	6.326	4.9788	intergenic
Pf3D7_09_v3	1446921	1447883	Troph_H3K4_peak_1177	23	.	1.59188	3.56665	2.36542	intergenic
Pf3D7_09_v3	1448335	1450539	Troph_H3K4_peak_1178	59	.	2.00133	7.30185	5.92635	intergenic
Pf3D7_09_v3	1450936	1453941	Troph_H3K4_peak_1179	66	.	2.06454	8.04642	6.65719	intergenic
Pf3D7_09_v3	1454341	1455736	Troph_H3K4_peak_1180	57	.	1.91806	7.1469	5.76367	PF3D7_0936700		lysophospholipase, putative
Pf3D7_09_v3	1456179	1456747	Troph_H3K4_peak_1181	11	.	1.47795	2.2715	1.17857	intergenic
Pf3D7_09_v3	1458944	1471292	Troph_H3K4_peak_1182	35	.	1.76683	4.8684	3.59913	PF3D7_0937000		Plasmodium exported protein (PHISTb), unknown function
Pf3D7_09_v3	1471826	1473547	Troph_H3K4_peak_1183	71	.	2.12925	8.63069	7.17267	intergenic
Pf3D7_09_v3	1474570	1475680	Troph_H3K4_peak_1184	176	.	2.80091	19.461	17.6648	PF3D7_0937300	RIF	rifin
Pf3D7_09_v3	1477643	1478335	Troph_H3K4_peak_1185	65	.	2.0861	7.95589	6.56011	PF3D7_0937400	RIF	rifin
Pf3D7_09_v3	1480898	1481938	Troph_H3K4_peak_1186	118	.	2.4495	13.4319	11.8037	PF3D7_0937500	RIF	rifin
Pf3D7_09_v3	1485933	1486857	Troph_H3K4_peak_1187	42	.	1.83051	5.59402	4.27678	PF3D7_0937600	VAR	erythrocyte membrane protein 1, PfEMP1
Pf3D7_09_v3	1493059	1493706	Troph_H3K4_peak_1188	101	.	2.381	11.7115	10.1409	intergenic
Pf3D7_09_v3	1495978	1496290	Troph_H3K4_peak_1189	33	.	1.80435	4.57098	3.30129	PF3D7_0937800	VAR	erythrocyte membrane protein 1, PfEMP1
Pf3D7_09_v3	1497807	1503531	Troph_H3K4_peak_1190	281	.	3.1915	30.0992	28.1028	intergenic
Pf3D7_09_v3	1505478	1506308	Troph_H3K4_peak_1191	343	.	3.96306	36.5636	34.3507	intergenic
Pf3D7_09_v3	1531477	1532737	Troph_H3K4_peak_1192	391	.	3.88325	41.316	39.1749	intergenic
Pf3D7_10_v3	9117	11402	Troph_H3K4_peak_1193	594	.	4.72273	61.8068	59.414	intergenic
Pf3D7_10_v3	25159	25827	Troph_H3K4_peak_1194	700	.	4.9607	72.7133	70.0836	intergenic
Pf3D7_10_v3	27267	27610	Troph_H3K4_peak_1195	257	.	3.49948	27.7789	25.7626	intergenic
Pf3D7_10_v3	28059	34132	Troph_H3K4_peak_1196	239	.	3.09971	25.9427	23.958	intergenic
Pf3D7_10_v3	38120	38876	Troph_H3K4_peak_1197	128	.	2.56739	14.5548	12.8721	PF3D7_1000200	RIF	rifin
Pf3D7_10_v3	41872	42758	Troph_H3K4_peak_1198	134	.	2.54616	15.0609	13.4199	PF3D7_1000300	RIF	rifin
Pf3D7_10_v3	44836	45742	Troph_H3K4_peak_1199	140	.	2.64774	15.7593	14.0469	PF3D7_1000400	RIF	rifin
Pf3D7_10_v3	46750	52231	Troph_H3K4_peak_1200	76	.	2.13383	9.15135	7.69177	intergenic
Pf3D7_10_v3	54677	60398	Troph_H3K4_peak_1201	66	.	2.04157	8.11893	6.6971	intergenic
Pf3D7_10_v3	69573	69939	Troph_H3K4_peak_1202	19	.	1.54546	3.07751	1.91173	PF3D7_1001200	ACBP2	acyl-CoA binding protein, isoform 2, ACBP2
Pf3D7_10_v3	70560	70818	Troph_H3K4_peak_1203	38	.	1.80322	5.16255	3.86442	PF3D7_1001200	ACBP2	acyl-CoA binding protein, isoform 2, ACBP2
Pf3D7_10_v3	71303	72275	Troph_H3K4_peak_1204	35	.	1.77621	4.81414	3.54809	PF3D7_1001300		Plasmodium exported protein (PHISTa), unknown function
Pf3D7_10_v3	77837	78374	Troph_H3K4_peak_1205	22	.	1.62994	3.43282	2.24485	intergenic
Pf3D7_10_v3	82082	82530	Troph_H3K4_peak_1206	238	.	3.07188	25.7657	23.8109	intergenic
Pf3D7_10_v3	84003	84498	Troph_H3K4_peak_1207	25	.	1.6506	3.81442	2.59747	intergenic
Pf3D7_10_v3	89954	90526	Troph_H3K4_peak_1208	78	.	2.22826	9.3398	7.85801	intergenic
Pf3D7_10_v3	90945	91992	Troph_H3K4_peak_1209	102	.	2.37528	11.7501	10.2112	PF3D7_1001700		Plasmodium exported protein (PHISTc), unknown function
Pf3D7_10_v3	93622	94335	Troph_H3K4_peak_1210	107	.	2.40741	12.3459	10.7557	intergenic
Pf3D7_10_v3	99560	99871	Troph_H3K4_peak_1211	17	.	1.50698	2.95347	1.7973	PF3D7_1001900	PfJ23	Plasmodium exported protein (hyp16), unknown function
Pf3D7_10_v3	102124	102378	Troph_H3K4_peak_1212	37	.	1.8045	5.01033	3.73257	PF3D7_1002000		Plasmodium exported protein (hyp2), unknown function
Pf3D7_10_v3	103769	104180	Troph_H3K4_peak_1213	15	.	1.5278	2.64116	1.51095	intergenic
Pf3D7_10_v3	105251	105750	Troph_H3K4_peak_1214	133	.	2.69007	15.0458	13.3738	intergenic
Pf3D7_10_v3	117349	118297	Troph_H3K4_peak_1215	43	.	1.80694	5.61554	4.30248	PF3D7_1002300		conserved Plasmodium protein, unknown function
Pf3D7_10_v3	121056	121576	Troph_H3K4_peak_1216	30	.	1.67049	4.26414	3.02695	PF3D7_1002400	TRA2B	transformer-2 protein homolog beta, putative
Pf3D7_10_v3	128160	128387	Troph_H3K4_peak_1217	26	.	1.71025	3.91161	2.6872	PF3D7_1002700		conserved Plasmodium protein, unknown function
Pf3D7_10_v3	139299	139850	Troph_H3K4_peak_1218	131	.	2.62609	14.8104	13.1487	intergenic
Pf3D7_10_v3	141031	141714	Troph_H3K4_peak_1219	64	.	2.11172	7.89408	6.47661	PF3D7_1003000		guanylate cyclase organizer UGO, putative
Pf3D7_10_v3	147844	148092	Troph_H3K4_peak_1220	18	.	1.49855	3.00683	1.84552	PF3D7_1003100	C4AP3	respiratory chain complex 4 associated protein 3
Pf3D7_10_v3	149397	149690	Troph_H3K4_peak_1221	44	.	1.90568	5.80774	4.48586	PF3D7_1003200		ribosome-binding factor A, putative	PF3D7_1003300	ARD1	N-terminal acetyltransferase A complex catalytic subunit ARD1, putative
Pf3D7_10_v3	155123	155412	Troph_H3K4_peak_1222	17	.	1.55079	2.88894	1.7385	intergenic
Pf3D7_10_v3	159273	159646	Troph_H3K4_peak_1223	30	.	1.73096	4.29297	3.04718	PF3D7_1003500		40S ribosomal protein S20e, putative
Pf3D7_10_v3	162598	163001	Troph_H3K4_peak_1224	71	.	2.1356	8.57595	7.1253	intergenic
Pf3D7_10_v3	163602	164180	Troph_H3K4_peak_1225	82	.	2.21879	9.72163	8.24224	PF3D7_1003600	IMC1c	inner membrane complex protein 1c, putative
Pf3D7_10_v3	180721	181067	Troph_H3K4_peak_1226	23	.	1.66586	3.50766	2.30746	intergenic
Pf3D7_10_v3	181614	181931	Troph_H3K4_peak_1227	20	.	1.62437	3.18547	2.00727	PF3D7_1004100		conserved Plasmodium protein, unknown function
Pf3D7_10_v3	199307	199785	Troph_H3K4_peak_1228	20	.	1.60912	3.25721	2.08139	PF3D7_1004300		E3 ubiquitin-protein ligase, putative
Pf3D7_10_v3	200945	201172	Troph_H3K4_peak_1229	30	.	1.749	4.27305	3.02314	intergenic
Pf3D7_10_v3	244613	245067	Troph_H3K4_peak_1230	17	.	1.54053	2.85478	1.70541	intergenic
Pf3D7_10_v3	250683	251026	Troph_H3K4_peak_1231	41	.	1.87046	5.41384	4.10673	PF3D7_1005800		conserved Plasmodium membrane protein, unknown function
Pf3D7_10_v3	259308	259989	Troph_H3K4_peak_1232	18	.	1.58622	3.01896	1.85802	PF3D7_1006100	NOT5	CCR4-NOT transcription complex subunit 5, putative
Pf3D7_10_v3	261854	262654	Troph_H3K4_peak_1233	57	.	2.02623	7.10343	5.73669	PF3D7_1006200	ALBA3	DNA/RNA-binding protein Alba 3
Pf3D7_10_v3	278020	278298	Troph_H3K4_peak_1234	47	.	1.95122	6.12806	4.78837	intergenic
Pf3D7_10_v3	288182	288545	Troph_H3K4_peak_1235	23	.	1.65603	3.53843	2.33873	PF3D7_1007200		rho GTPase-activating protein, putative
Pf3D7_10_v3	292435	292677	Troph_H3K4_peak_1236	30	.	1.64513	4.27942	3.03323	PF3D7_1007300		RING zinc finger protein, putative
Pf3D7_10_v3	294505	294824	Troph_H3K4_peak_1237	17	.	1.55898	2.87152	1.72336	intergenic
Pf3D7_10_v3	299185	299617	Troph_H3K4_peak_1238	42	.	1.76787	5.54875	4.23484	PF3D7_1007600		conserved protein, unknown function	PF3D7_1007700	AP2-I	AP2 domain transcription factor AP2-I
Pf3D7_10_v3	307471	308396	Troph_H3K4_peak_1239	16	.	1.56857	2.81747	1.67246	intergenic
Pf3D7_10_v3	308895	309336	Troph_H3K4_peak_1240	129	.	2.64731	14.5769	12.9089	intergenic
Pf3D7_10_v3	309918	310814	Troph_H3K4_peak_1241	43	.	1.89661	5.67217	4.36467	PF3D7_1007800		conserved Plasmodium protein, unknown function
Pf3D7_10_v3	351766	352127	Troph_H3K4_peak_1242	23	.	1.58049	3.55475	2.35777	intergenic
Pf3D7_10_v3	356196	356493	Troph_H3K4_peak_1243	18	.	1.57123	2.95974	1.8025	intergenic
Pf3D7_10_v3	359014	359348	Troph_H3K4_peak_1244	30	.	1.74851	4.33905	3.09189	PF3D7_1008700		tubulin beta chain
Pf3D7_10_v3	372506	372779	Troph_H3K4_peak_1245	46	.	1.84174	5.97467	4.6384	PF3D7_1009100		conserved Plasmodium membrane protein, unknown function
Pf3D7_10_v3	377024	377601	Troph_H3K4_peak_1246	46	.	1.80443	5.92432	4.60503	PF3D7_1009300		AMP-binding protein, putative
Pf3D7_10_v3	391584	392708	Troph_H3K4_peak_1247	77	.	2.1157	9.17836	7.71321	intergenic
Pf3D7_10_v3	393437	393666	Troph_H3K4_peak_1248	40	.	1.88123	5.40237	4.09635	PF3D7_1009800		conserved Plasmodium membrane protein, unknown function
Pf3D7_10_v3	412667	413484	Troph_H3K4_peak_1249	84	.	2.07216	9.87764	8.40352	PF3D7_1010300	SDH4	succinate dehydrogenase subunit 4, putative
Pf3D7_10_v3	417965	418316	Troph_H3K4_peak_1250	31	.	1.76353	4.40122	3.1453	PF3D7_1010500		ankyrin-repeat protein, putative
Pf3D7_10_v3	421975	422377	Troph_H3K4_peak_1251	110	.	2.38393	12.5996	11.0073	PF3D7_1010700		dolichyl-phosphate-mannose--protein mannosyltransferase, putative
Pf3D7_10_v3	429228	429471	Troph_H3K4_peak_1252	23	.	1.58152	3.50193	2.30311	PF3D7_1011000	ISP1	inner membrane complex sub-compartment protein 1
Pf3D7_10_v3	431272	432733	Troph_H3K4_peak_1253	34	.	1.79458	4.72747	3.45591	PF3D7_1011100		conserved Plasmodium protein, unknown function
Pf3D7_10_v3	452063	452473	Troph_H3K4_peak_1254	15	.	1.51827	2.64819	1.51956	PF3D7_1011800	PREBP	PRE-binding protein
Pf3D7_10_v3	457938	458816	Troph_H3K4_peak_1255	213	.	2.79561	23.1161	21.3112	intergenic
Pf3D7_10_v3	472613	473326	Troph_H3K4_peak_1256	16	.	1.53304	2.77655	1.63549	PF3D7_1012300	QCR7	cytochrome b-c1 complex subunit 7, putative
Pf3D7_10_v3	475391	475922	Troph_H3K4_peak_1257	46	.	1.78036	6.00953	4.67501	PF3D7_1012400	HGPRT	hypoxanthine-guanine phosphoribosyltransferase
Pf3D7_10_v3	477177	477760	Troph_H3K4_peak_1258	43	.	1.89236	5.65188	4.33157	PF3D7_1012500		phosphoglucomutase, putative
Pf3D7_10_v3	501848	502280	Troph_H3K4_peak_1259	84	.	2.19317	9.98077	8.48638	PF3D7_1013100	UTP13	U3 small nucleolar RNA-associated protein 13, putative
Pf3D7_10_v3	553698	554332	Troph_H3K4_peak_1260	30	.	1.70795	4.3355	3.08884	PF3D7_1014100	MSA180	merozoite surface protein MSA180
Pf3D7_10_v3	560390	560922	Troph_H3K4_peak_1261	70	.	2.02	8.52127	7.07688	PF3D7_1014200	HAP2	male gamete fusion factor HAP2, putative
Pf3D7_10_v3	584636	585521	Troph_H3K4_peak_1262	44	.	1.77202	5.73255	4.42215	intergenic
Pf3D7_10_v3	604685	605000	Troph_H3K4_peak_1263	32	.	1.65893	4.53705	3.27973	intergenic
Pf3D7_10_v3	608552	609155	Troph_H3K4_peak_1264	34	.	1.7511	4.72365	3.44514	intergenic
Pf3D7_10_v3	611569	612062	Troph_H3K4_peak_1265	48	.	1.83429	6.22283	4.88244	PF3D7_1015100		CWC16 domain-containing protein, putative
Pf3D7_10_v3	631579	631819	Troph_H3K4_peak_1266	27	.	1.68368	3.96689	2.73732	PF3D7_1015800		ribonucleoside-diphosphate reductase small chain, putative
Pf3D7_10_v3	636433	636893	Troph_H3K4_peak_1267	152	.	2.71677	16.9588	15.2305	PF3D7_1015900	ENO	enolase
Pf3D7_10_v3	644691	645174	Troph_H3K4_peak_1268	23	.	1.64864	3.55153	2.35365	PF3D7_1016200		Rab3 GTPase-activating protein non-catalytic subunit, putative
Pf3D7_10_v3	654600	655422	Troph_H3K4_peak_1269	365	.	3.91846	38.6911	36.5756	intergenic
Pf3D7_10_v3	657110	657392	Troph_H3K4_peak_1270	39	.	1.76499	5.22952	3.93025	PF3D7_1016400	FIKK10.1	serine/threonine protein kinase, FIKK family
Pf3D7_10_v3	662656	663692	Troph_H3K4_peak_1271	85	.	2.17517	10.0633	8.58677	intergenic
Pf3D7_10_v3	664624	664870	Troph_H3K4_peak_1272	27	.	1.71865	3.93462	2.70465	PF3D7_1016600		Plasmodium exported protein (PHISTc), unknown function
Pf3D7_10_v3	674171	674600	Troph_H3K4_peak_1273	93	.	2.37962	10.9289	9.38645	PF3D7_1016800		Plasmodium exported protein (PHISTc), unknown function
Pf3D7_10_v3	677196	677681	Troph_H3K4_peak_1274	25	.	1.68694	3.74659	2.53662	intergenic
Pf3D7_10_v3	678856	679265	Troph_H3K4_peak_1275	55	.	1.99556	6.88547	5.50672	intergenic
Pf3D7_10_v3	682234	682513	Troph_H3K4_peak_1276	33	.	1.75506	4.58916	3.32826	intergenic
Pf3D7_10_v3	701150	702609	Troph_H3K4_peak_1277	14	.	1.49721	2.57838	1.45587	PF3D7_1017500	ELC	myosin essential light chain ELC
Pf3D7_10_v3	703877	704148	Troph_H3K4_peak_1278	63	.	2.12758	7.72323	6.30718	PF3D7_1017600		conserved Plasmodium protein, unknown function
Pf3D7_10_v3	707283	708159	Troph_H3K4_peak_1279	49	.	1.96027	6.29659	4.94515	intergenic
Pf3D7_10_v3	710042	710728	Troph_H3K4_peak_1280	22	.	1.6373	3.38719	2.20426	PF3D7_1017800		conserved Plasmodium protein, unknown function
Pf3D7_10_v3	725341	726070	Troph_H3K4_peak_1281	49	.	1.9307	6.29917	4.95463	intergenic
Pf3D7_10_v3	734527	734912	Troph_H3K4_peak_1282	70	.	2.15041	8.5014	7.05522	PF3D7_1018400		conserved Plasmodium protein, unknown function	PF3D7_1018500	RDS3	pre-mRNA-splicing factor RDS3, putative
Pf3D7_10_v3	763297	763848	Troph_H3K4_peak_1283	59	.	1.89407	7.34319	5.94503	intergenic
Pf3D7_10_v3	766444	766685	Troph_H3K4_peak_1284	20	.	1.5791	3.24558	2.06779	PF3D7_1019100		conserved Plasmodium protein, unknown function
Pf3D7_10_v3	772550	773135	Troph_H3K4_peak_1285	29	.	1.69513	4.16572	2.92475	PF3D7_1019200		conserved Plasmodium protein, unknown function
Pf3D7_10_v3	780611	780838	Troph_H3K4_peak_1286	19	.	1.60283	3.07484	1.90957	intergenic
Pf3D7_10_v3	783358	785010	Troph_H3K4_peak_1287	285	.	3.1648	30.4887	28.5823	intergenic
Pf3D7_10_v3	804875	805271	Troph_H3K4_peak_1288	53	.	1.98377	6.71106	5.3404	PF3D7_1019800		tRNA methyltransferase, putative
Pf3D7_10_v3	808553	808839	Troph_H3K4_peak_1289	16	.	1.51335	2.80889	1.667	PF3D7_1019900	ATG8	autophagy-related protein 8
Pf3D7_10_v3	820605	820832	Troph_H3K4_peak_1290	21	.	1.52969	3.35604	2.17126	intergenic
Pf3D7_10_v3	821825	822157	Troph_H3K4_peak_1291	90	.	2.14991	10.5394	9.02025	PF3D7_1020400	RCM1	rRNA (cytosine-C(5))-methyltransferase, putative
Pf3D7_10_v3	843801	844209	Troph_H3K4_peak_1292	33	.	1.75506	4.59036	3.3302	PF3D7_1020900	ARF1	ADP-ribosylation factor 1
Pf3D7_10_v3	855080	855319	Troph_H3K4_peak_1293	24	.	1.60435	3.62441	2.41467	intergenic
Pf3D7_10_v3	860148	860376	Troph_H3K4_peak_1294	35	.	1.78317	4.85697	3.5765	PF3D7_1021300		apicoplast integral membrane protein, putative
Pf3D7_10_v3	863101	863333	Troph_H3K4_peak_1295	27	.	1.68064	3.9871	2.76155	PF3D7_1021400		endomembrane protein 70, putative
Pf3D7_10_v3	875760	876516	Troph_H3K4_peak_1296	23	.	1.57621	3.59013	2.39359	intergenic
Pf3D7_10_v3	904406	904664	Troph_H3K4_peak_1297	32	.	1.72118	4.52939	3.27326	PF3D7_1021900		PHAX domain-containing protein, putative
Pf3D7_10_v3	908696	909572	Troph_H3K4_peak_1298	59	.	1.98915	7.36137	5.95843	intergenic
Pf3D7_10_v3	925185	926045	Troph_H3K4_peak_1299	44	.	1.78936	5.73506	4.42767	PF3D7_1022100		methyltransferase, putative	PF3D7_1022200		conserved Plasmodium membrane protein, unknown function
Pf3D7_10_v3	930631	931518	Troph_H3K4_peak_1300	50	.	1.93832	6.35737	5.00081	PF3D7_1022300	ZIPCO	ZIP domain-containing protein, putative
Pf3D7_10_v3	933009	933236	Troph_H3K4_peak_1301	16	.	1.49672	2.81455	1.66966	intergenic
Pf3D7_10_v3	935013	936277	Troph_H3K4_peak_1302	13	.	1.47473	2.44086	1.33076	intergenic
Pf3D7_10_v3	937296	937915	Troph_H3K4_peak_1303	14	.	1.49972	2.60107	1.47578	intergenic
Pf3D7_10_v3	941034	941340	Troph_H3K4_peak_1304	55	.	1.86537	6.9335	5.55565	intergenic
Pf3D7_10_v3	953507	954156	Troph_H3K4_peak_1305	75	.	2.12521	9.04172	7.56944	intergenic
Pf3D7_10_v3	983831	984714	Troph_H3K4_peak_1306	28	.	1.70937	4.08142	2.84806	PF3D7_1023300		conserved protein, unknown function	PF3D7_1023400		HORMA domain protein, putative
Pf3D7_10_v3	985889	986202	Troph_H3K4_peak_1307	72	.	2.1741	8.72224	7.27122	PF3D7_1023500		conserved Plasmodium protein, unknown function
Pf3D7_10_v3	993355	994945	Troph_H3K4_peak_1308	142	.	2.63851	15.9295	14.2484	PF3D7_1023800		conserved Plasmodium protein, unknown function
Pf3D7_10_v3	998164	998391	Troph_H3K4_peak_1309	21	.	1.54433	3.34346	2.15566	intergenic
Pf3D7_10_v3	999292	1000108	Troph_H3K4_peak_1310	344	.	3.19232	36.59	34.436	intergenic
Pf3D7_10_v3	1011854	1012281	Troph_H3K4_peak_1311	185	.	2.67856	20.3436	18.513	intergenic
Pf3D7_10_v3	1013453	1014087	Troph_H3K4_peak_1312	52	.	1.90403	6.63415	5.27414	PF3D7_1024000		conserved Plasmodium protein, unknown function
Pf3D7_10_v3	1024301	1024556	Troph_H3K4_peak_1313	30	.	1.7294	4.29627	3.04298	intergenic
Pf3D7_10_v3	1027586	1027826	Troph_H3K4_peak_1314	35	.	1.73305	4.82325	3.54388	PF3D7_1024600		RAP protein, putative
Pf3D7_10_v3	1038693	1039144	Troph_H3K4_peak_1315	41	.	1.74881	5.49481	4.18531	intergenic
Pf3D7_10_v3	1073202	1073474	Troph_H3K4_peak_1316	23	.	1.58549	3.54863	2.3485	intergenic
Pf3D7_10_v3	1100794	1101606	Troph_H3K4_peak_1317	93	.	2.26346	10.9108	9.39518	PF3D7_1026100		conserved Plasmodium protein, unknown function
Pf3D7_10_v3	1120200	1120441	Troph_H3K4_peak_1318	39	.	1.83455	5.25157	3.95168	intergenic
Pf3D7_10_v3	1121655	1122139	Troph_H3K4_peak_1319	36	.	1.77969	4.88377	3.60619	PF3D7_1026800	RPS2	40S ribosomal protein S2
Pf3D7_10_v3	1123489	1123746	Troph_H3K4_peak_1320	10	.	1.38655	2.17662	1.09368	intergenic
Pf3D7_10_v3	1124612	1124839	Troph_H3K4_peak_1321	29	.	1.68813	4.18687	2.94699	PF3D7_1026900	HCS1	biotin--protein ligase 1
Pf3D7_10_v3	1130014	1130616	Troph_H3K4_peak_1322	178	.	2.89584	19.7135	17.8892	intergenic
Pf3D7_10_v3	1134137	1134396	Troph_H3K4_peak_1323	18	.	1.53769	2.97342	1.81355	PF3D7_1027100	MPP10	U3 small nucleolar ribonucleoprotein protein MPP10, putative
Pf3D7_10_v3	1143577	1144305	Troph_H3K4_peak_1324	94	.	2.4075	10.9968	9.44795	intergenic
Pf3D7_10_v3	1153342	1153672	Troph_H3K4_peak_1325	20	.	1.51487	3.26508	2.08482	PF3D7_1027800	RPL3	60S ribosomal protein L3
Pf3D7_10_v3	1178445	1179047	Troph_H3K4_peak_1326	142	.	2.7442	15.9409	14.2433	PF3D7_1028700	MTRAP	merozoite TRAP-like protein
Pf3D7_10_v3	1186508	1186776	Troph_H3K4_peak_1327	65	.	2.14518	7.99202	6.5596	intergenic
Pf3D7_10_v3	1198713	1199159	Troph_H3K4_peak_1328	71	.	2.01141	8.60759	7.15688	intergenic
Pf3D7_10_v3	1205336	1205687	Troph_H3K4_peak_1329	145	.	2.7019	16.2298	14.5194	PF3D7_1029600	ADA	adenosine deaminase
Pf3D7_10_v3	1207089	1207322	Troph_H3K4_peak_1330	12	.	1.41114	2.39687	1.29094	PF3D7_1029700		conserved Plasmodium protein, unknown function
Pf3D7_10_v3	1208064	1208422	Troph_H3K4_peak_1331	48	.	1.89275	6.18688	4.84095	PF3D7_1029700		conserved Plasmodium protein, unknown function
Pf3D7_10_v3	1211104	1211351	Troph_H3K4_peak_1332	53	.	2.0008	6.74037	5.37031	PF3D7_1029800	HPR2	heptatricopeptide repeat and RAP domain-containing protein, putative
Pf3D7_10_v3	1214292	1215117	Troph_H3K4_peak_1333	54	.	1.99975	6.84822	5.46782	intergenic
Pf3D7_10_v3	1216957	1217246	Troph_H3K4_peak_1334	37	.	1.85309	5.05799	3.76857	PF3D7_1029900		ORC3 domain-containing protein, putative
Pf3D7_10_v3	1221513	1222133	Troph_H3K4_peak_1335	22	.	1.56786	3.43648	2.24212	intergenic
Pf3D7_10_v3	1230552	1230916	Troph_H3K4_peak_1336	17	.	1.4866	2.87795	1.72923	PF3D7_1030200	CLAMP	claudin-like apicomplexan microneme protein, putative
Pf3D7_10_v3	1232863	1233804	Troph_H3K4_peak_1337	44	.	1.91658	5.74317	4.41706	PF3D7_1030300		conserved Plasmodium protein, unknown function
Pf3D7_10_v3	1241149	1241470	Troph_H3K4_peak_1338	32	.	1.74864	4.49139	3.23464	PF3D7_1030400		conserved protein, unknown function
Pf3D7_10_v3	1245928	1246335	Troph_H3K4_peak_1339	36	.	1.68194	4.97014	3.68602	PF3D7_1030600	KAE1	tRNA N6-adenosine threonylcarbamoyltransferase
Pf3D7_10_v3	1249655	1250217	Troph_H3K4_peak_1340	22	.	1.64248	3.39887	2.21068	PF3D7_1030800		calmodulin, putative
Pf3D7_10_v3	1253689	1254130	Troph_H3K4_peak_1341	22	.	1.53932	3.46412	2.27105	PF3D7_1031000	P25	ookinete surface protein P25	PF3D7_1031100		conserved Plasmodium protein, unknown function
Pf3D7_10_v3	1256094	1256797	Troph_H3K4_peak_1342	96	.	2.32624	11.1298	9.60539	PF3D7_1031200	MORN1	MORN repeat-containing protein 1
Pf3D7_10_v3	1257402	1257814	Troph_H3K4_peak_1343	16	.	1.45135	2.77468	1.63338	intergenic
Pf3D7_10_v3	1264284	1264974	Troph_H3K4_peak_1344	15	.	1.54355	2.67447	1.54347	PF3D7_1031400	OTU	OTU-like cysteine protease
Pf3D7_10_v3	1267758	1268177	Troph_H3K4_peak_1345	67	.	1.95828	8.20818	6.77073	intergenic
Pf3D7_10_v3	1273081	1274021	Troph_H3K4_peak_1346	18	.	1.57972	2.96877	1.8117	intergenic
Pf3D7_10_v3	1279383	1279773	Troph_H3K4_peak_1347	86	.	2.13832	10.1264	8.61946	PF3D7_1031700	I3	protein phosphatase inhibitor 3
Pf3D7_10_v3	1298905	1299413	Troph_H3K4_peak_1348	29	.	1.69874	4.1936	2.96253	PF3D7_1032200		conserved Plasmodium protein, unknown function	PF3D7_1032300		conserved protein, unknown function
Pf3D7_10_v3	1304766	1305127	Troph_H3K4_peak_1349	14	.	1.50373	2.59826	1.47342	PF3D7_1032500	Der1-2	DER1-like protein, putative
Pf3D7_10_v3	1306843	1307395	Troph_H3K4_peak_1350	52	.	1.92301	6.61882	5.24685	intergenic
Pf3D7_10_v3	1310143	1310803	Troph_H3K4_peak_1351	55	.	2.03599	6.91752	5.53129	PF3D7_1032700		conserved Plasmodium protein, unknown function
Pf3D7_10_v3	1333164	1333485	Troph_H3K4_peak_1352	39	.	1.86346	5.2128	3.91755	PF3D7_1033200	ETRAMP10.2	early transcribed membrane protein 10.2
Pf3D7_10_v3	1335860	1336136	Troph_H3K4_peak_1353	17	.	1.4882	2.89382	1.74379	intergenic
Pf3D7_10_v3	1394007	1394700	Troph_H3K4_peak_1354	104	.	2.36828	11.9752	10.4009	PF3D7_1035200		S-antigen
Pf3D7_10_v3	1399707	1400005	Troph_H3K4_peak_1355	24	.	1.57436	3.65725	2.45352	intergenic
Pf3D7_10_v3	1407423	1408065	Troph_H3K4_peak_1356	38	.	1.74499	5.14854	3.85078	intergenic
Pf3D7_10_v3	1409425	1409685	Troph_H3K4_peak_1357	35	.	1.74764	4.79351	3.51276	PF3D7_1035600	H101	merozoite surface protein
Pf3D7_10_v3	1412306	1412840	Troph_H3K4_peak_1358	180	.	2.81609	19.8637	18.0505	PF3D7_1035700	DBLMSP	duffy binding-like merozoite surface protein
Pf3D7_10_v3	1429060	1434742	Troph_H3K4_peak_1359	107	.	2.31325	12.3047	10.7283	PF3D7_1036300	DBLMSP2	duffy binding-like merozoite surface protein 2
Pf3D7_10_v3	1435244	1436646	Troph_H3K4_peak_1360	56	.	2.00214	7.08536	5.69472	PF3D7_1036400	LSA1	liver stage antigen 1
Pf3D7_10_v3	1440546	1441426	Troph_H3K4_peak_1361	75	.	2.19808	9.01119	7.56295	PF3D7_1036500		conserved Plasmodium protein, unknown function
Pf3D7_10_v3	1460053	1460564	Troph_H3K4_peak_1362	67	.	2.07017	8.13222	6.70507	intergenic
Pf3D7_10_v3	1470441	1470869	Troph_H3K4_peak_1363	99	.	2.15735	11.5565	9.9953	PF3D7_1037100	PyKII	pyruvate kinase 2
Pf3D7_10_v3	1504201	1504779	Troph_H3K4_peak_1364	21	.	1.63354	3.29843	2.11703	PF3D7_1038000		antigen UB05
Pf3D7_10_v3	1509994	1510555	Troph_H3K4_peak_1365	21	.	1.59464	3.30958	2.12972	PF3D7_1038200		conserved Plasmodium protein, unknown function
Pf3D7_10_v3	1518804	1519085	Troph_H3K4_peak_1366	25	.	1.63922	3.77791	2.5633	PF3D7_1038400	Pf11-1	gametocyte-specific protein
Pf3D7_10_v3	1551482	1552211	Troph_H3K4_peak_1367	34	.	1.6771	4.66912	3.40101	PF3D7_1038600		Plasmodium exported protein, unknown function
Pf3D7_10_v3	1565193	1565588	Troph_H3K4_peak_1368	132	.	2.61022	14.9283	13.2685	intergenic
Pf3D7_10_v3	1567177	1567444	Troph_H3K4_peak_1369	44	.	1.90609	5.8248	4.49638	PF3D7_1039000	FIKK10.2	serine/threonine protein kinase, FIKK family
Pf3D7_10_v3	1567952	1568209	Troph_H3K4_peak_1370	54	.	2.03914	6.77905	5.4027	PF3D7_1039000	FIKK10.2	serine/threonine protein kinase, FIKK family
Pf3D7_10_v3	1603077	1604474	Troph_H3K4_peak_1371	140	.	2.50787	15.7386	14.067	PF3D7_1040100	RIF	rifin
Pf3D7_10_v3	1604939	1605375	Troph_H3K4_peak_1372	26	.	1.70766	3.87456	2.65768	PF3D7_1040200		stevor
Pf3D7_10_v3	1606349	1606971	Troph_H3K4_peak_1373	73	.	2.08977	8.75297	7.30107	PF3D7_1040200		stevor
Pf3D7_10_v3	1608480	1611065	Troph_H3K4_peak_1374	99	.	2.349	11.4976	9.94617	PF3D7_1040300	RIF	rifin
Pf3D7_10_v3	1611854	1613252	Troph_H3K4_peak_1375	82	.	2.1262	9.67633	8.23196	PF3D7_1040400	RIF	rifin
Pf3D7_10_v3	1614338	1615834	Troph_H3K4_peak_1376	30	.	1.56702	4.33969	3.09671	PF3D7_1040500	RIF	rifin
Pf3D7_10_v3	1616317	1618630	Troph_H3K4_peak_1377	74	.	1.86325	8.93206	7.47643	intergenic
Pf3D7_10_v3	1619500	1620629	Troph_H3K4_peak_1378	348	.	2.9261	37.0169	34.8665	PF3D7_1040600	RIF	rifin
Pf3D7_10_v3	1622551	1623733	Troph_H3K4_peak_1379	237	.	2.58517	25.695	23.7221	PF3D7_1040700	RIF	rifin
Pf3D7_10_v3	1625101	1625394	Troph_H3K4_peak_1380	50	.	1.99423	6.37939	5.02471	PF3D7_1040800	RIF	rifin
Pf3D7_10_v3	1625972	1626911	Troph_H3K4_peak_1381	170	.	2.76747	18.8233	17.0181	PF3D7_1040800	RIF	rifin
Pf3D7_10_v3	1627446	1628639	Troph_H3K4_peak_1382	60	.	2.10116	7.40819	6.00316	PF3D7_1040900	RIF	rifin
Pf3D7_10_v3	1629372	1630062	Troph_H3K4_peak_1383	53	.	2.02085	6.71317	5.34661	PF3D7_1040900	RIF	rifin
Pf3D7_10_v3	1630477	1630962	Troph_H3K4_peak_1384	23	.	1.62149	3.51962	2.32321	intergenic
Pf3D7_10_v3	1631805	1633651	Troph_H3K4_peak_1385	75	.	2.13598	8.95493	7.50676	PF3D7_1041000	RIF	rifin
Pf3D7_10_v3	1635863	1636654	Troph_H3K4_peak_1386	120	.	2.46677	13.6093	12.0141	PF3D7_1041100	RIF	rifin
Pf3D7_10_v3	1639716	1640522	Troph_H3K4_peak_1387	66	.	2.04497	8.06453	6.63636	PF3D7_1041200	RIF	rifin
Pf3D7_10_v3	1644502	1650169	Troph_H3K4_peak_1388	202	.	2.78324	22.0355	20.218	intergenic
Pf3D7_10_v3	1650837	1651065	Troph_H3K4_peak_1389	64	.	2.14262	7.85986	6.43618	intergenic
Pf3D7_10_v3	1651545	1652837	Troph_H3K4_peak_1390	204	.	3.15427	22.2959	20.426	intergenic
Pf3D7_10_v3	1676601	1679397	Troph_H3K4_peak_1391	258	.	3.4639	27.8691	25.8906	intergenic
Pf3D7_10_v3	1681850	1682085	Troph_H3K4_peak_1392	55	.	2.04795	6.93016	5.55036	intergenic
Pf3D7_11_v3	11473	12612	Troph_H3K4_peak_1393	66	.	2.11901	8.0815	6.67116	intergenic
Pf3D7_11_v3	13274	13545	Troph_H3K4_peak_1394	26	.	1.71198	3.83871	2.61527	intergenic
Pf3D7_11_v3	13968	15339	Troph_H3K4_peak_1395	20	.	1.60084	3.22733	2.05387	intergenic
Pf3D7_11_v3	18572	18865	Troph_H3K4_peak_1396	20	.	1.61578	3.26426	2.08432	intergenic
Pf3D7_11_v3	22971	23267	Troph_H3K4_peak_1397	108	.	2.50797	12.4849	10.8938	intergenic
Pf3D7_11_v3	23956	28233	Troph_H3K4_peak_1398	157	.	2.5497	17.4335	15.7074	intergenic
Pf3D7_11_v3	29117	29433	Troph_H3K4_peak_1399	29	.	1.72581	4.20622	2.96841	intergenic
Pf3D7_11_v3	34613	42552	Troph_H3K4_peak_1400	106	.	2.27642	12.2396	10.6587	intergenic
Pf3D7_11_v3	48596	49234	Troph_H3K4_peak_1401	151	.	2.73467	16.8887	15.1404	PF3D7_1100400	RIF	rifin
Pf3D7_11_v3	52232	52583	Troph_H3K4_peak_1402	82	.	2.28591	9.77358	8.28465	PF3D7_1100500	RIF	rifin
Pf3D7_11_v3	53000	54234	Troph_H3K4_peak_1403	35	.	1.80354	4.82443	3.55462	intergenic
Pf3D7_11_v3	66815	67333	Troph_H3K4_peak_1404	45	.	1.91268	5.92678	4.58576	PF3D7_1101100	RIF	rifin
Pf3D7_11_v3	70163	70700	Troph_H3K4_peak_1405	213	.	3.18908	23.2421	21.3309	PF3D7_1101200	RIF	rifin
Pf3D7_11_v3	71469	71881	Troph_H3K4_peak_1406	76	.	2.24007	9.14734	7.68009	intergenic
Pf3D7_11_v3	72419	74244	Troph_H3K4_peak_1407	77	.	2.15567	9.21844	7.74352	PF3D7_1101300	RIF	rifin
Pf3D7_11_v3	74782	75377	Troph_H3K4_peak_1408	19	.	1.60567	3.07461	1.90886	intergenic
Pf3D7_11_v3	75954	76957	Troph_H3K4_peak_1409	72	.	2.2014	8.69299	7.24371	intergenic
Pf3D7_11_v3	111706	111943	Troph_H3K4_peak_1410	24	.	1.65839	3.64187	2.43123	intergenic
Pf3D7_11_v3	122605	122926	Troph_H3K4_peak_1411	11	.	1.46294	2.19114	1.1073	PF3D7_1102600	GEXP14	Plasmodium exported protein, unknown function
Pf3D7_11_v3	125366	125757	Troph_H3K4_peak_1412	39	.	1.85807	5.21411	3.92119	intergenic
Pf3D7_11_v3	132798	134257	Troph_H3K4_peak_1413	141	.	2.27042	15.7739	14.1159	intergenic
Pf3D7_11_v3	136696	137213	Troph_H3K4_peak_1414	14	.	1.47985	2.60235	1.4763	PF3D7_1102900		Plasmodium exported protein (hyp11), unknown function
Pf3D7_11_v3	138625	139161	Troph_H3K4_peak_1415	151	.	2.67172	16.9113	15.1772	PF3D7_1103000		conserved Plasmodium protein, unknown function	PF3D7_1103100	RPP1	60S acidic ribosomal protein P1, putative
Pf3D7_11_v3	140027	140272	Troph_H3K4_peak_1416	43	.	1.91797	5.64507	4.31775	PF3D7_1103100	RPP1	60S acidic ribosomal protein P1, putative
Pf3D7_11_v3	143212	143636	Troph_H3K4_peak_1417	308	.	2.76201	32.908	30.8016	intergenic
Pf3D7_11_v3	144511	145637	Troph_H3K4_peak_1418	120	.	2.2154	13.6691	12.0721	PF3D7_1103400	SufD	iron-sulfur cluster assembly protein SufD
Pf3D7_11_v3	154071	155070	Troph_H3K4_peak_1419	24	.	1.67079	3.62638	2.42438	intergenic
Pf3D7_11_v3	161099	161401	Troph_H3K4_peak_1420	40	.	1.89312	5.35748	4.04627	intergenic
Pf3D7_11_v3	163266	163504	Troph_H3K4_peak_1421	19	.	1.59772	3.11178	1.94158	intergenic
Pf3D7_11_v3	167249	167497	Troph_H3K4_peak_1422	15	.	1.44125	2.72424	1.58678	intergenic
Pf3D7_11_v3	189024	189571	Troph_H3K4_peak_1423	36	.	1.80703	4.93785	3.6593	intergenic
Pf3D7_11_v3	211350	211587	Troph_H3K4_peak_1424	29	.	1.75557	4.19351	2.94859	intergenic
Pf3D7_11_v3	212259	212569	Troph_H3K4_peak_1425	41	.	1.8974	5.45486	4.14513	PF3D7_1104900		calcium/calmodulin-dependent protein kinase, putative
Pf3D7_11_v3	216258	216542	Troph_H3K4_peak_1426	43	.	1.82194	5.68966	4.37181	intergenic
Pf3D7_11_v3	219768	220871	Troph_H3K4_peak_1427	17	.	1.51216	2.92438	1.77187	PF3D7_1105000	H4	histone H4
Pf3D7_11_v3	221739	222039	Troph_H3K4_peak_1428	68	.	2.03486	8.2611	6.82469	intergenic
Pf3D7_11_v3	223071	224465	Troph_H3K4_peak_1429	71	.	2.09435	8.63031	7.17605	intergenic
Pf3D7_11_v3	224930	225571	Troph_H3K4_peak_1430	82	.	2.25116	9.75118	8.27908	PF3D7_1105100	H2B	histone H2B
Pf3D7_11_v3	226121	226456	Troph_H3K4_peak_1431	39	.	1.83143	5.28359	3.98009	intergenic
Pf3D7_11_v3	227974	228603	Troph_H3K4_peak_1432	63	.	1.93116	7.75297	6.35401	PF3D7_1105200	WDR8	WD repeat-containing protein WRAP73, putative
Pf3D7_11_v3	235915	236331	Troph_H3K4_peak_1433	12	.	1.47257	2.35037	1.24891	PF3D7_1105400	RPS4	40S ribosomal protein S4, putative
Pf3D7_11_v3	240937	241386	Troph_H3K4_peak_1434	65	.	2.02645	7.96994	6.54974	PF3D7_1105600	PTEX88	translocon component PTEX88
Pf3D7_11_v3	243278	243605	Troph_H3K4_peak_1435	51	.	1.91765	6.54176	5.18889	intergenic
Pf3D7_11_v3	293052	293865	Troph_H3K4_peak_1436	65	.	2.13429	7.92776	6.50755	PF3D7_1107100		nucleic acid binding protein, putative
Pf3D7_11_v3	301403	301640	Troph_H3K4_peak_1437	17	.	1.4602	2.905	1.75277	PF3D7_1107300	PAIP1	polyadenylate-binding protein-interacting protein 1, putative
Pf3D7_11_v3	315608	315887	Troph_H3K4_peak_1438	33	.	1.74362	4.57497	3.30946	intergenic
Pf3D7_11_v3	321933	323728	Troph_H3K4_peak_1439	60	.	1.98609	7.43147	6.04067	PF3D7_1107600		conserved Plasmodium protein, unknown function
Pf3D7_11_v3	338565	339109	Troph_H3K4_peak_1440	44	.	1.90413	5.72197	4.41525	intergenic
Pf3D7_11_v3	339929	340770	Troph_H3K4_peak_1441	84	.	2.20764	9.96203	8.48718	intergenic
Pf3D7_11_v3	342324	343093	Troph_H3K4_peak_1442	95	.	2.35789	11.054	9.50997	intergenic
Pf3D7_11_v3	347919	348179	Troph_H3K4_peak_1443	29	.	1.66498	4.17753	2.93836	intergenic
Pf3D7_11_v3	350366	350696	Troph_H3K4_peak_1444	26	.	1.7003	3.91608	2.69101	intergenic
Pf3D7_11_v3	355048	355589	Troph_H3K4_peak_1445	116	.	2.46435	13.2547	11.6256	PF3D7_1108100		conserved Plasmodium protein, unknown function
Pf3D7_11_v3	361260	361493	Troph_H3K4_peak_1446	31	.	1.72624	4.40151	3.1477	PF3D7_1108200	DTD	D-tyrosyl-tRNA(Tyr) deacylase	PF3D7_1108300	PCD	pterin-4a-carbinolamine dehydratase
Pf3D7_11_v3	368092	368803	Troph_H3K4_peak_1447	27	.	1.64317	3.92877	2.70621	PF3D7_1108600	ERC	endoplasmic reticulum-resident calcium binding protein
Pf3D7_11_v3	371282	371861	Troph_H3K4_peak_1448	58	.	2.06729	7.23505	5.84914	PF3D7_1108700	Pfj2	heat shock protein J2
Pf3D7_11_v3	372435	372691	Troph_H3K4_peak_1449	20	.	1.58344	3.23655	2.06107	PF3D7_1108700	Pfj2	heat shock protein J2
Pf3D7_11_v3	386864	387235	Troph_H3K4_peak_1450	49	.	1.89861	6.31432	4.97124	PF3D7_1109200		conserved Plasmodium protein, unknown function
Pf3D7_11_v3	417996	418881	Troph_H3K4_peak_1451	21	.	1.5868	3.31082	2.12678	intergenic
Pf3D7_11_v3	441308	442177	Troph_H3K4_peak_1452	14	.	1.50443	2.57536	1.45315	PF3D7_1111300	BOS1	protein transport protein BOS1, putative
Pf3D7_11_v3	448986	449587	Troph_H3K4_peak_1453	19	.	1.55542	3.09512	1.92951	PF3D7_1111600		endonuclease/exonuclease/phosphatase family protein, putative
Pf3D7_11_v3	450547	450864	Troph_H3K4_peak_1454	14	.	1.47181	2.61176	1.48436	intergenic
Pf3D7_11_v3	495824	496505	Troph_H3K4_peak_1455	75	.	2.03497	8.98852	7.55944	intergenic
Pf3D7_11_v3	524325	524687	Troph_H3K4_peak_1456	24	.	1.60355	3.63038	2.4231	PF3D7_1113500		GTP-binding protein, putative
Pf3D7_11_v3	545890	546124	Troph_H3K4_peak_1457	13	.	1.4032	2.41749	1.31067	intergenic
Pf3D7_11_v3	561999	562325	Troph_H3K4_peak_1458	51	.	1.9339	6.49324	5.13939	PF3D7_1114900		filamin domain-containing protein, putative
Pf3D7_11_v3	575350	575659	Troph_H3K4_peak_1459	34	.	1.75202	4.68811	3.42783	PF3D7_1115200	SET7	histone-lysine N-methyltransferase SET7
Pf3D7_11_v3	583031	583562	Troph_H3K4_peak_1460	35	.	1.8149	4.78097	3.50777	PF3D7_1115400	FP3	cysteine proteinase falcipain 3
Pf3D7_11_v3	586677	587852	Troph_H3K4_peak_1461	74	.	2.11386	8.91366	7.49167	PF3D7_1115500	ApiAP2	AP2 domain transcription factor, putative
Pf3D7_11_v3	590954	591218	Troph_H3K4_peak_1462	21	.	1.65299	3.38831	2.19492	PF3D7_1115700	FP2A	cysteine proteinase falcipain 2a
Pf3D7_11_v3	594054	595078	Troph_H3K4_peak_1463	85	.	2.14785	10.0524	8.58302	PF3D7_1115800		conserved Plasmodium protein, unknown function
Pf3D7_11_v3	596435	597213	Troph_H3K4_peak_1464	83	.	2.05299	9.89553	8.3895	intergenic
Pf3D7_11_v3	598434	598926	Troph_H3K4_peak_1465	11	.	1.43335	2.2114	1.1243	PF3D7_1115900	DHHC9	palmitoyltransferase DHHC9
Pf3D7_11_v3	630835	631318	Troph_H3K4_peak_1466	70	.	2.00302	8.51473	7.09529	PF3D7_1116700	DPAP1	dipeptidyl aminopeptidase 1
Pf3D7_11_v3	633559	634175	Troph_H3K4_peak_1467	34	.	1.7965	4.74574	3.47818	intergenic
Pf3D7_11_v3	634907	635318	Troph_H3K4_peak_1468	48	.	1.90613	6.18364	4.84535	PF3D7_1116800	HSP101	heat shock protein 101
Pf3D7_11_v3	641519	642238	Troph_H3K4_peak_1469	181	.	2.72042	19.9031	18.1462	intergenic
Pf3D7_11_v3	643189	643875	Troph_H3K4_peak_1470	21	.	1.6272	3.28562	2.10429	PF3D7_1116900		conserved protein, unknown function
Pf3D7_11_v3	645183	645443	Troph_H3K4_peak_1471	35	.	1.73573	4.85147	3.57062	intergenic
Pf3D7_11_v3	645855	646754	Troph_H3K4_peak_1472	102	.	2.2671	11.8379	10.2901	PF3D7_1117000		MFS domain-containing protein P115, putative
Pf3D7_11_v3	654646	654903	Troph_H3K4_peak_1473	47	.	1.92565	6.1014	4.76786	PF3D7_1117200		conserved Plasmodium protein, unknown function
Pf3D7_11_v3	655742	656246	Troph_H3K4_peak_1474	14	.	1.49694	2.54617	1.4257	intergenic
Pf3D7_11_v3	663331	663627	Troph_H3K4_peak_1475	46	.	1.90727	5.94141	4.61372	PF3D7_1117400		conserved Plasmodium protein, unknown function
Pf3D7_11_v3	670779	671520	Troph_H3K4_peak_1476	48	.	1.861	6.22013	4.89007	PF3D7_1117700	RAN	GTP-binding nuclear protein RAN/TC4
Pf3D7_11_v3	673030	673301	Troph_H3K4_peak_1477	38	.	1.85523	5.13279	3.838	PF3D7_1117800	MLH	DNA mismatch repair protein MLH
Pf3D7_11_v3	688826	689075	Troph_H3K4_peak_1478	20	.	1.52805	3.19248	2.01704	PF3D7_1118200		heat shock protein 90, putative
Pf3D7_11_v3	708195	708702	Troph_H3K4_peak_1479	19	.	1.53725	3.11175	1.94533	PF3D7_1118700	MLC-B	myosin light chain B
Pf3D7_11_v3	713601	713890	Troph_H3K4_peak_1480	41	.	1.86381	5.43877	4.13132	PF3D7_1118800	ARC40	actin-related protein 2/3 complex subunit 1, putative
Pf3D7_11_v3	724983	725651	Troph_H3K4_peak_1481	14	.	1.46388	2.57539	1.45331	intergenic
Pf3D7_11_v3	760832	761186	Troph_H3K4_peak_1482	27	.	1.70761	4.00599	2.77441	PF3D7_1120100	PGM1	phosphoglycerate mutase, putative
Pf3D7_11_v3	776288	776733	Troph_H3K4_peak_1483	34	.	1.77461	4.72482	3.44636	intergenic
Pf3D7_11_v3	781901	782211	Troph_H3K4_peak_1484	12	.	1.46506	2.3023	1.20598	intergenic
Pf3D7_11_v3	787127	787486	Troph_H3K4_peak_1485	17	.	1.50327	2.91365	1.76222	intergenic
Pf3D7_11_v3	808287	808902	Troph_H3K4_peak_1486	993	.	6.04806	102.312	99.3823	intergenic
Pf3D7_11_v3	810861	811121	Troph_H3K4_peak_1487	21	.	1.55709	3.38828	2.19896	PF3D7_1121400		WD repeat-containing protein, putative
Pf3D7_11_v3	815423	815789	Troph_H3K4_peak_1488	25	.	1.61695	3.81066	2.59512	intergenic
Pf3D7_11_v3	817591	818467	Troph_H3K4_peak_1489	245	.	2.91045	26.5461	24.5923	PF3D7_1121700	GCN20	protein GCN20
Pf3D7_11_v3	829877	830622	Troph_H3K4_peak_1490	24	.	1.62807	3.69175	2.4859	intergenic
Pf3D7_11_v3	834869	835555	Troph_H3K4_peak_1491	28	.	1.68408	4.10348	2.87242	PF3D7_1121900	PDK1	3-phosphoinositide-dependent protein kinase 1
Pf3D7_11_v3	837181	837674	Troph_H3K4_peak_1492	12	.	1.45744	2.38173	1.27737	PF3D7_1122000		conserved protein, unknown function
Pf3D7_11_v3	838271	838757	Troph_H3K4_peak_1493	19	.	1.56998	3.14212	1.97027	PF3D7_1122000		conserved protein, unknown function
Pf3D7_11_v3	847717	847962	Troph_H3K4_peak_1494	17	.	1.50917	2.94703	1.79126	PF3D7_1122300		conserved Plasmodium protein, unknown function	PF3D7_1122400		conserved Plasmodium protein, unknown function
Pf3D7_11_v3	858833	859189	Troph_H3K4_peak_1495	42	.	1.74536	5.50878	4.20133	PF3D7_1122600		conserved Plasmodium protein, unknown function
Pf3D7_11_v3	866585	867414	Troph_H3K4_peak_1496	28	.	1.65053	4.06691	2.83742	intergenic
Pf3D7_11_v3	870345	870608	Troph_H3K4_peak_1497	60	.	2.05864	7.48825	6.07987	PF3D7_1122800	CDPK6	calcium-dependent protein kinase 6
Pf3D7_11_v3	878008	878583	Troph_H3K4_peak_1498	34	.	1.75081	4.71896	3.44216	PF3D7_1122900		dynein heavy chain, putative
Pf3D7_11_v3	892591	893088	Troph_H3K4_peak_1499	56	.	1.86413	6.97334	5.60153	intergenic
Pf3D7_11_v3	904848	905086	Troph_H3K4_peak_1500	22	.	1.65993	3.45972	2.26429	intergenic
Pf3D7_11_v3	906249	906701	Troph_H3K4_peak_1501	22	.	1.59875	3.4224	2.23646	intergenic
Pf3D7_11_v3	908072	908690	Troph_H3K4_peak_1502	33	.	1.78013	4.62158	3.35663	PF3D7_1123100	CDPK7	calcium-dependent protein kinase 7
Pf3D7_11_v3	916014	916357	Troph_H3K4_peak_1503	42	.	1.78976	5.51013	4.20267	intergenic
Pf3D7_11_v3	979335	980710	Troph_H3K4_peak_1504	35	.	1.80667	4.7842	3.5136	PF3D7_1124900	RPL35	60S ribosomal protein L35, putative
Pf3D7_11_v3	1001238	1001683	Troph_H3K4_peak_1505	31	.	1.70188	4.38153	3.12459	PF3D7_1125500	SNRPD1	small nuclear ribonucleoprotein Sm D1, putative	PF3D7_1125600	C4AP1	respiratory chain complex 4 associated protein 1
Pf3D7_11_v3	1002403	1002684	Troph_H3K4_peak_1506	44	.	1.93387	5.79273	4.46439	PF3D7_1125600	C4AP1	respiratory chain complex 4 associated protein 1
Pf3D7_11_v3	1007667	1007921	Troph_H3K4_peak_1507	31	.	1.77793	4.3859	3.13036	PF3D7_1125800		kelch domain-containing protein, putative
Pf3D7_11_v3	1010520	1010827	Troph_H3K4_peak_1508	73	.	1.95003	8.83465	7.37952	intergenic
Pf3D7_11_v3	1011282	1011629	Troph_H3K4_peak_1509	13	.	1.51506	2.51191	1.395	PF3D7_1125900		XTBD domain-containing protein, putative
Pf3D7_11_v3	1018683	1018940	Troph_H3K4_peak_1510	31	.	1.64519	4.3845	3.13186	PF3D7_1126100	ATG7	autophagy-related protein 7, putative
Pf3D7_11_v3	1024930	1025910	Troph_H3K4_peak_1511	52	.	1.95681	6.57487	5.21541	intergenic
Pf3D7_11_v3	1043908	1044370	Troph_H3K4_peak_1512	160	.	2.7302	17.7815	16.0317	intergenic
Pf3D7_11_v3	1045760	1046053	Troph_H3K4_peak_1513	11	.	1.48454	2.27652	1.18183	intergenic
Pf3D7_11_v3	1046578	1047477	Troph_H3K4_peak_1514	165	.	2.93477	18.3535	16.5433	intergenic
Pf3D7_11_v3	1048960	1049205	Troph_H3K4_peak_1515	43	.	1.92365	5.62943	4.30473	PF3D7_1126800	SR-MG	alternative splicing factor SR-MG, putative
Pf3D7_11_v3	1049762	1050479	Troph_H3K4_peak_1516	15	.	1.48133	2.68168	1.55015	PF3D7_1126800	SR-MG	alternative splicing factor SR-MG, putative
Pf3D7_11_v3	1061156	1061570	Troph_H3K4_peak_1517	28	.	1.72879	4.0616	2.82511	intergenic
Pf3D7_11_v3	1062076	1062434	Troph_H3K4_peak_1518	39	.	1.87509	5.2582	3.9578	PF3D7_1127200		conserved Plasmodium protein, unknown function	PF3D7_1127300		tRNA (guanine-N(7)-)-methyltransferase, putative
Pf3D7_11_v3	1066524	1066809	Troph_H3K4_peak_1519	25	.	1.67568	3.77462	2.55843	PF3D7_1127500		protein disulfide-isomerase, putative
Pf3D7_11_v3	1096996	1097474	Troph_H3K4_peak_1520	138	.	2.59923	15.5679	13.8676	PF3D7_1128200	MBF1	multiprotein-bridging factor 1, putative	PF3D7_1128300	PFK11	ATP-dependent 6-phosphofructokinase
Pf3D7_11_v3	1117059	1117826	Troph_H3K4_peak_1521	76	.	2.24571	9.07887	7.60228	PF3D7_1128900		conserved protein, unknown function
Pf3D7_11_v3	1122407	1123321	Troph_H3K4_peak_1522	50	.	1.89239	6.43122	5.09849	intergenic
Pf3D7_11_v3	1123782	1124485	Troph_H3K4_peak_1523	57	.	2.05167	7.09819	5.71584	PF3D7_1129100	PV1	parasitophorous vacuolar protein 1
Pf3D7_11_v3	1126792	1127195	Troph_H3K4_peak_1524	24	.	1.55935	3.63057	2.42713	intergenic
Pf3D7_11_v3	1132745	1133033	Troph_H3K4_peak_1525	29	.	1.65097	4.19434	2.95623	intergenic
Pf3D7_11_v3	1145119	1145420	Troph_H3K4_peak_1526	18	.	1.54049	2.97537	1.81762	PF3D7_1129600		phosphatidylinositol-4-phosphate 5-kinase, putative
Pf3D7_11_v3	1146772	1147123	Troph_H3K4_peak_1527	76	.	2.21273	9.14547	7.678	intergenic
Pf3D7_11_v3	1148584	1149102	Troph_H3K4_peak_1528	185	.	2.89958	20.3866	18.5804	PF3D7_1129700		conserved Plasmodium protein, unknown function
Pf3D7_11_v3	1151622	1151936	Troph_H3K4_peak_1529	29	.	1.74972	4.15448	2.91302	PF3D7_1129800		conserved Plasmodium protein, unknown function
Pf3D7_11_v3	1153812	1154143	Troph_H3K4_peak_1530	60	.	2.08187	7.40547	6.00774	intergenic
Pf3D7_11_v3	1155002	1155418	Troph_H3K4_peak_1531	47	.	1.96971	6.12195	4.77802	PF3D7_1129900	MFR5	major facilitator superfamily-related transporter, putative
Pf3D7_11_v3	1165494	1166186	Troph_H3K4_peak_1532	29	.	1.62563	4.16577	2.92986	intergenic
Pf3D7_11_v3	1182291	1182718	Troph_H3K4_peak_1533	144	.	2.51286	16.1722	14.4612	intergenic
Pf3D7_11_v3	1190725	1191002	Troph_H3K4_peak_1534	37	.	1.82157	5.07135	3.7795	PF3D7_1130900		conserved Plasmodium protein, unknown function
Pf3D7_11_v3	1207156	1207400	Troph_H3K4_peak_1535	43	.	1.83391	5.6798	4.36154	intergenic
Pf3D7_11_v3	1212660	1213412	Troph_H3K4_peak_1536	13	.	1.50622	2.49236	1.3781	intergenic
Pf3D7_11_v3	1216579	1217050	Troph_H3K4_peak_1537	15	.	1.50234	2.71532	1.57959	PF3D7_1131600		kelch domain-containing protein, putative
Pf3D7_11_v3	1225786	1226749	Troph_H3K4_peak_1538	38	.	1.78696	5.14978	3.86271	PF3D7_1131700		conserved Plasmodium protein, unknown function	PF3D7_1131800		oxysterol-binding protein, putative
Pf3D7_11_v3	1236771	1237829	Troph_H3K4_peak_1539	157	.	2.7271	17.4999	15.7908	intergenic
Pf3D7_11_v3	1241998	1242419	Troph_H3K4_peak_1540	17	.	1.50197	2.9415	1.7868	intergenic
Pf3D7_11_v3	1270398	1270677	Troph_H3K4_peak_1541	36	.	1.82553	4.88973	3.60543	PF3D7_1132800	AQP	aquaglyceroporin
Pf3D7_11_v3	1291962	1293142	Troph_H3K4_peak_1542	25	.	1.66896	3.71141	2.50594	PF3D7_1133400	AMA1	apical membrane antigen 1
Pf3D7_11_v3	1300099	1300901	Troph_H3K4_peak_1543	14	.	1.53128	2.6031	1.4764	PF3D7_1133700		FHA domain-containing protein, putative
Pf3D7_11_v3	1302152	1302632	Troph_H3K4_peak_1544	40	.	1.84793	5.37932	4.08088	intergenic
Pf3D7_11_v3	1307115	1307549	Troph_H3K4_peak_1545	96	.	2.32263	11.1541	9.60529	PF3D7_1133800		RNA (uracil-5-)methyltransferase, putative
Pf3D7_11_v3	1318108	1318638	Troph_H3K4_peak_1546	52	.	1.92104	6.591	5.23624	PF3D7_1134000	HSP70-3	heat shock protein 70
Pf3D7_11_v3	1350799	1351271	Troph_H3K4_peak_1547	16	.	1.52714	2.80957	1.66751	PF3D7_1134600		zinc finger protein, putative
Pf3D7_11_v3	1377632	1378216	Troph_H3K4_peak_1548	68	.	2.11201	8.2747	6.84759	intergenic
Pf3D7_11_v3	1385545	1386241	Troph_H3K4_peak_1549	18	.	1.59224	3.01053	1.852	intergenic
Pf3D7_11_v3	1387405	1387908	Troph_H3K4_peak_1550	35	.	1.72655	4.87453	3.59511	PF3D7_1135500		RNA-binding protein, putative
Pf3D7_11_v3	1401191	1401490	Troph_H3K4_peak_1551	32	.	1.80077	4.56259	3.29587	intergenic
Pf3D7_11_v3	1414131	1414408	Troph_H3K4_peak_1552	26	.	1.66441	3.82329	2.60309	intergenic
Pf3D7_11_v3	1421757	1422023	Troph_H3K4_peak_1553	48	.	1.94228	6.21543	4.87428	PF3D7_1136300	TSN	tudor staphylococcal nuclease
Pf3D7_11_v3	1433703	1433958	Troph_H3K4_peak_1554	29	.	1.61711	4.1845	2.9436	intergenic
Pf3D7_11_v3	1446533	1446789	Troph_H3K4_peak_1555	18	.	1.58439	3.0383	1.87536	PF3D7_1136700	AIP	armadillo-interacting protein AIP
Pf3D7_11_v3	1459742	1460271	Troph_H3K4_peak_1556	113	.	2.20836	12.9181	11.3234	intergenic
Pf3D7_11_v3	1460831	1461640	Troph_H3K4_peak_1557	393	.	3.65181	41.5654	39.3301	PF3D7_1137100		ribosomal protein S9, mitochondrial, putative
Pf3D7_11_v3	1465430	1465757	Troph_H3K4_peak_1558	47	.	1.91391	6.08785	4.75979	PF3D7_1137300		CLPTM1 domain-containing protein, putative
Pf3D7_11_v3	1481871	1482380	Troph_H3K4_peak_1559	214	.	3.04282	23.3079	21.4245	intergenic
Pf3D7_11_v3	1486284	1487256	Troph_H3K4_peak_1560	163	.	2.70766	18.0386	16.335	PF3D7_1138000		conserved Plasmodium protein, unknown function
Pf3D7_11_v3	1531080	1531346	Troph_H3K4_peak_1561	15	.	1.49386	2.67054	1.53942	intergenic
Pf3D7_11_v3	1548262	1549563	Troph_H3K4_peak_1562	146	.	2.68644	16.3297	14.6007	intergenic
Pf3D7_11_v3	1566827	1567111	Troph_H3K4_peak_1563	24	.	1.68759	3.63442	2.4223	intergenic
Pf3D7_11_v3	1569570	1569798	Troph_H3K4_peak_1564	30	.	1.71511	4.25937	3.01081	intergenic
Pf3D7_11_v3	1574076	1574849	Troph_H3K4_peak_1565	319	.	3.53388	33.9227	31.9062	intergenic
Pf3D7_11_v3	1582651	1583115	Troph_H3K4_peak_1566	57	.	1.94847	7.11786	5.74531	PF3D7_1139700		adrenodoxin reductase, putative
Pf3D7_11_v3	1606609	1607669	Troph_H3K4_peak_1567	48	.	1.91311	6.23813	4.89802	PF3D7_1140400		conserved Plasmodium protein, unknown function
Pf3D7_11_v3	1622303	1622542	Troph_H3K4_peak_1568	30	.	1.75954	4.26992	3.02203	PF3D7_1140700		chromo domain-containing protein, putative
Pf3D7_11_v3	1632650	1632907	Troph_H3K4_peak_1569	66	.	2.14275	8.05011	6.62635	PF3D7_1140800		conserved Plasmodium protein, unknown function
Pf3D7_11_v3	1641437	1641901	Troph_H3K4_peak_1570	48	.	1.90265	6.1765	4.82804	intergenic
Pf3D7_11_v3	1649471	1649810	Troph_H3K4_peak_1571	11	.	1.44343	2.27106	1.17826	PF3D7_1141100		conserved Plasmodium protein, unknown function
Pf3D7_11_v3	1675452	1675889	Troph_H3K4_peak_1572	54	.	2.02291	6.8445	5.48063	PF3D7_1141900	IMC1b	inner membrane complex protein 1b, putative
Pf3D7_11_v3	1704507	1705843	Troph_H3K4_peak_1573	21	.	1.63496	3.33792	2.15931	PF3D7_1142500	RPL28	60S ribosomal protein L28
Pf3D7_11_v3	1707439	1707703	Troph_H3K4_peak_1574	21	.	1.60703	3.34275	2.1595	PF3D7_1142600		60S ribosomal protein L35ae, putative
Pf3D7_11_v3	1740370	1740598	Troph_H3K4_peak_1575	27	.	1.73671	4.01675	2.77979	PF3D7_1143600		conserved Plasmodium protein, unknown function
Pf3D7_11_v3	1756572	1756983	Troph_H3K4_peak_1576	28	.	1.67201	4.05662	2.82976	PF3D7_1144100		mitochondrial large subunit ribosomal protein, putative	PF3D7_1144200		conserved Plasmodium protein, unknown function
Pf3D7_11_v3	1757611	1758808	Troph_H3K4_peak_1577	199	.	2.77394	21.7731	19.9879	PF3D7_1144200		conserved Plasmodium protein, unknown function
Pf3D7_11_v3	1790049	1790497	Troph_H3K4_peak_1578	13	.	1.47764	2.49122	1.37615	intergenic
Pf3D7_11_v3	1791581	1791849	Troph_H3K4_peak_1579	28	.	1.6717	4.09812	2.86416	intergenic
Pf3D7_11_v3	1795774	1796103	Troph_H3K4_peak_1580	72	.	2.16106	8.70156	7.25338	intergenic
Pf3D7_11_v3	1798403	1798871	Troph_H3K4_peak_1581	94	.	2.32478	11.0342	9.48185	PF3D7_1145300	CRIPT	cysteine-rich PDZ-binding protein, putative
Pf3D7_11_v3	1810389	1810861	Troph_H3K4_peak_1582	72	.	2.15352	8.75715	7.29489	PF3D7_1145600		TMEM65 domain-containing protein, putative
Pf3D7_11_v3	1812057	1812363	Troph_H3K4_peak_1583	43	.	1.87495	5.63016	4.30977	PF3D7_1145700		bicoid-interacting protein BIN3, putative
Pf3D7_11_v3	1826150	1826581	Troph_H3K4_peak_1584	50	.	1.94643	6.43795	5.09083	PF3D7_1146200		conserved Plasmodium protein, unknown function
Pf3D7_11_v3	1849049	1849448	Troph_H3K4_peak_1585	16	.	1.53385	2.82805	1.68283	intergenic
Pf3D7_11_v3	1854778	1855296	Troph_H3K4_peak_1586	78	.	2.18057	9.32164	7.8406	PF3D7_1146900		protein YIPF6, putative
Pf3D7_11_v3	1868021	1869080	Troph_H3K4_peak_1587	95	.	2.31028	11.0419	9.51347	intergenic
Pf3D7_11_v3	1878303	1878665	Troph_H3K4_peak_1588	16	.	1.51898	2.74121	1.60333	intergenic
Pf3D7_11_v3	1897913	1898565	Troph_H3K4_peak_1589	86	.	2.20099	10.1456	8.65152	PF3D7_1147800	MAEBL	membrane associated erythrocyte binding-like protein
Pf3D7_11_v3	1906991	1907384	Troph_H3K4_peak_1590	21	.	1.56118	3.37524	2.18861	PF3D7_1147900	PEX22	peroxisome assembly protein 22, putative
Pf3D7_11_v3	1936772	1937590	Troph_H3K4_peak_1591	57	.	2.04553	7.13508	5.75649	intergenic
Pf3D7_11_v3	1943889	1944494	Troph_H3K4_peak_1592	64	.	1.99581	7.84913	6.43009	PF3D7_1148900		Plasmodium exported protein, unknown function
Pf3D7_11_v3	1947462	1948365	Troph_H3K4_peak_1593	40	.	1.85393	5.38618	4.09361	PF3D7_1149000	Pf332	antigen 332, DBL-like protein
Pf3D7_11_v3	1967923	1968239	Troph_H3K4_peak_1594	28	.	1.64606	4.10752	2.87097	intergenic
Pf3D7_11_v3	1970098	1970683	Troph_H3K4_peak_1595	11	.	1.47336	2.23562	1.14627	PF3D7_1149100		Plasmodium exported protein, unknown function
Pf3D7_11_v3	1987611	1987987	Troph_H3K4_peak_1596	35	.	1.79983	4.80429	3.52727	intergenic
Pf3D7_11_v3	1995271	1995835	Troph_H3K4_peak_1597	62	.	2.04658	7.64843	6.23564	intergenic
Pf3D7_11_v3	2002182	2009272	Troph_H3K4_peak_1598	78	.	2.11481	9.32785	7.87891	PF3D7_1149700		Plasmodium exported protein (PHISTa), unknown function, fragment	PF3D7_1149800	RIF	rifin
Pf3D7_11_v3	2010298	2012761	Troph_H3K4_peak_1599	110	.	2.38282	12.5939	11.0522	intergenic
Pf3D7_11_v3	2013181	2019813	Troph_H3K4_peak_1600	128	.	2.48938	14.5155	12.8609	intergenic
Pf3D7_11_v3	2021454	2021814	Troph_H3K4_peak_1601	30	.	1.76937	4.29458	3.04274	PF3D7_1150300	RIF	rifin
Pf3D7_11_v3	2022354	2022683	Troph_H3K4_peak_1602	45	.	1.94648	5.93141	4.59974	PF3D7_1150300	RIF	rifin
Pf3D7_11_v3	2025485	2034063	Troph_H3K4_peak_1603	217	.	2.9243	23.6878	21.7974	intergenic
Pf3D7_11_v3	2034499	2035119	Troph_H3K4_peak_1604	58	.	2.06064	7.19548	5.8101	intergenic
Pf3D7_12_v3	8309	14950	Troph_H3K4_peak_1605	344	.	3.56406	36.3761	34.4269	intergenic
Pf3D7_12_v3	15687	16137	Troph_H3K4_peak_1606	489	.	4.67739	51.3586	48.9638	intergenic
Pf3D7_12_v3	16787	22196	Troph_H3K4_peak_1607	246	.	3.1215	26.6172	24.6229	intergenic
Pf3D7_12_v3	26297	27068	Troph_H3K4_peak_1608	144	.	2.64219	16.2011	14.4681	PF3D7_1200200	RIF	rifin
Pf3D7_12_v3	30168	30838	Troph_H3K4_peak_1609	187	.	2.89119	20.5737	18.714	PF3D7_1200300	RIF	rifin
Pf3D7_12_v3	32537	38855	Troph_H3K4_peak_1610	142	.	2.50059	15.9483	14.2693	intergenic
Pf3D7_12_v3	44095	44560	Troph_H3K4_peak_1611	15	.	1.50273	2.65426	1.52343	PF3D7_1200500	RIF	rifin
Pf3D7_12_v3	50295	60626	Troph_H3K4_peak_1612	119	.	2.32834	13.539	11.924	intergenic
Pf3D7_12_v3	61259	61924	Troph_H3K4_peak_1613	418	.	3.90455	44.0144	41.832	PF3D7_1200700	ACS7	acyl-CoA synthetase
Pf3D7_12_v3	62324	63451	Troph_H3K4_peak_1614	19	.	1.55157	3.16479	1.99785	intergenic
Pf3D7_12_v3	65093	65498	Troph_H3K4_peak_1615	29	.	1.65504	4.23823	2.99297	intergenic
Pf3D7_12_v3	79609	80034	Troph_H3K4_peak_1616	63	.	2.08785	7.79797	6.38432	intergenic
Pf3D7_12_v3	84825	85547	Troph_H3K4_peak_1617	66	.	2.14964	8.11838	6.68727	intergenic
Pf3D7_12_v3	91789	92556	Troph_H3K4_peak_1618	21	.	1.61447	3.35494	2.17163	PF3D7_1201300	LSAP1	liver stage associated protein 1
Pf3D7_12_v3	97489	97855	Troph_H3K4_peak_1619	33	.	1.76424	4.65897	3.39513	intergenic
Pf3D7_12_v3	107511	107757	Troph_H3K4_peak_1620	28	.	1.65053	4.10242	2.86881	PF3D7_1201900		conserved protein, unknown function
Pf3D7_12_v3	125251	125561	Troph_H3K4_peak_1621	38	.	1.78012	5.16509	3.86873	intergenic
Pf3D7_12_v3	130147	130408	Troph_H3K4_peak_1622	12	.	1.47639	2.34641	1.24492	intergenic
Pf3D7_12_v3	133216	133545	Troph_H3K4_peak_1623	73	.	2.18135	8.8342	7.37707	intergenic
Pf3D7_12_v3	137842	138534	Troph_H3K4_peak_1624	70	.	2.07822	8.50325	7.06144	intergenic
Pf3D7_12_v3	160766	161348	Troph_H3K4_peak_1625	22	.	1.62033	3.48632	2.29105	PF3D7_1202800		DNA/RNA-binding protein, putative	PF3D7_1202900	HMGB1	high mobility group protein B1
Pf3D7_12_v3	165473	166289	Troph_H3K4_peak_1626	22	.	1.66314	3.4756	2.27781	intergenic
Pf3D7_12_v3	191268	191678	Troph_H3K4_peak_1627	27	.	1.73233	4.00661	2.77123	intergenic
Pf3D7_12_v3	192184	192840	Troph_H3K4_peak_1628	44	.	1.92981	5.77304	4.44787	intergenic
Pf3D7_12_v3	196813	198133	Troph_H3K4_peak_1629	93	.	2.29692	10.8243	9.31309	PF3D7_1204000		conserved Plasmodium protein, unknown function
Pf3D7_12_v3	205489	206012	Troph_H3K4_peak_1630	85	.	2.11724	10.0641	8.56172	intergenic
Pf3D7_12_v3	206957	207391	Troph_H3K4_peak_1631	15	.	1.55341	2.70911	1.57176	PF3D7_1204400	G37	sexual stage-specific protein G37, putative
Pf3D7_12_v3	227759	227990	Troph_H3K4_peak_1632	61	.	2.10867	7.53108	6.12389	intergenic
Pf3D7_12_v3	237690	238114	Troph_H3K4_peak_1633	36	.	1.81862	4.88107	3.60554	intergenic
Pf3D7_12_v3	239014	239368	Troph_H3K4_peak_1634	74	.	2.07517	8.8626	7.41132	intergenic
Pf3D7_12_v3	246254	246517	Troph_H3K4_peak_1635	13	.	1.46492	2.44816	1.33765	intergenic
Pf3D7_12_v3	271707	272073	Troph_H3K4_peak_1636	74	.	2.13041	8.90079	7.43656	PF3D7_1206100	ISN1	IMP-specific 5'-nucleotidase 1
Pf3D7_12_v3	289086	289950	Troph_H3K4_peak_1637	83	.	2.20159	9.86246	8.37041	PF3D7_1206400	TUM1	thiosulfate sulfurtransferase, putative
Pf3D7_12_v3	298257	298533	Troph_H3K4_peak_1638	27	.	1.59239	3.96869	2.74246	intergenic
Pf3D7_12_v3	306471	306872	Troph_H3K4_peak_1639	82	.	2.26174	9.74249	8.25229	intergenic
Pf3D7_12_v3	312294	312544	Troph_H3K4_peak_1640	20	.	1.57137	3.22876	2.05079	PF3D7_1207000		conserved Plasmodium protein, unknown function
Pf3D7_12_v3	327920	328772	Troph_H3K4_peak_1641	144	.	2.6228	16.1443	14.4736	PF3D7_1207200		zinc finger protein, putative
Pf3D7_12_v3	331118	331385	Troph_H3K4_peak_1642	60	.	1.93141	7.50265	6.0922	intergenic
Pf3D7_12_v3	341140	342837	Troph_H3K4_peak_1643	52	.	1.9354	6.56495	5.23856	intergenic
Pf3D7_12_v3	369974	370485	Troph_H3K4_peak_1644	36	.	1.72912	4.95171	3.664	intergenic
Pf3D7_12_v3	412004	412375	Troph_H3K4_peak_1645	15	.	1.55027	2.69918	1.56479	PF3D7_1208900	PPM11	protein phosphatase PPM11, putative
Pf3D7_12_v3	413082	413807	Troph_H3K4_peak_1646	59	.	2.06326	7.339	5.9553	PF3D7_1208900	PPM11	protein phosphatase PPM11, putative
Pf3D7_12_v3	420646	421442	Troph_H3K4_peak_1647	17	.	1.54175	2.88756	1.7371	PF3D7_1209000		mago-binding protein, putative
Pf3D7_12_v3	454210	454455	Troph_H3K4_peak_1648	33	.	1.78004	4.61363	3.34713	PF3D7_1210100	SYN2	syntaxin, Qa-SNARE family
Pf3D7_12_v3	462990	463952	Troph_H3K4_peak_1649	67	.	2.05544	8.20123	6.79807	intergenic
Pf3D7_12_v3	490847	491313	Troph_H3K4_peak_1650	62	.	1.92603	7.62788	6.22208	PF3D7_1211100		HSP20-like chaperone, putative	PF3D7_1211200		conserved Plasmodium protein, unknown function
Pf3D7_12_v3	503700	504560	Troph_H3K4_peak_1651	37	.	1.84501	5.0711	3.78859	PF3D7_1211400	PfJ4	heat shock protein DNAJ homologue Pfj4
Pf3D7_12_v3	512907	513251	Troph_H3K4_peak_1652	46	.	1.85304	6.03139	4.69584	intergenic
Pf3D7_12_v3	532027	532978	Troph_H3K4_peak_1653	21	.	1.56411	3.38267	2.19221	intergenic
Pf3D7_12_v3	539302	539903	Troph_H3K4_peak_1654	113	.	2.39135	12.9436	11.3512	PF3D7_1212200		conserved protein, unknown function
Pf3D7_12_v3	575140	575864	Troph_H3K4_peak_1655	37	.	1.69016	5.01515	3.74541	intergenic
Pf3D7_12_v3	576313	576705	Troph_H3K4_peak_1656	257	.	2.73992	27.7905	25.7766	PF3D7_1213200	MED18	mediator of RNA polymerase II transcription subunit 18, putative
Pf3D7_12_v3	586838	587065	Troph_H3K4_peak_1657	27	.	1.65066	4.02313	2.78792	PF3D7_1213600	DLC8	dynein light chain 1, putative	PF3D7_1213700	RPB8	DNA-directed RNA polymerases I, II, and III subunit RPABC3, putative
Pf3D7_12_v3	590175	590408	Troph_H3K4_peak_1658	30	.	1.70859	4.35216	3.09494	PF3D7_1213800	PRS	proline--tRNA ligase
Pf3D7_12_v3	600003	600420	Troph_H3K4_peak_1659	78	.	2.15368	9.29398	7.81603	intergenic
Pf3D7_12_v3	619651	620121	Troph_H3K4_peak_1660	34	.	1.7563	4.71689	3.44256	PF3D7_1215000	Trx-Px2	thioredoxin peroxidase 2
Pf3D7_12_v3	620744	621682	Troph_H3K4_peak_1661	24	.	1.55759	3.6156	2.41497	PF3D7_1215000	Trx-Px2	thioredoxin peroxidase 2
Pf3D7_12_v3	622800	623175	Troph_H3K4_peak_1662	10	.	1.45259	2.10501	1.03055	PF3D7_1215100		SUN domain-containing protein, putative
Pf3D7_12_v3	625709	626371	Troph_H3K4_peak_1663	16	.	1.53702	2.81377	1.6702	PF3D7_1215200	CYP32	peptidyl-prolyl cis-trans isomerase
Pf3D7_12_v3	636752	637368	Troph_H3K4_peak_1664	199	.	2.89857	21.851	19.9834	intergenic
Pf3D7_12_v3	660002	661494	Troph_H3K4_peak_1665	212	.	2.76585	22.9482	21.2048	intergenic
Pf3D7_12_v3	666718	667152	Troph_H3K4_peak_1666	419	.	3.85105	44.1971	41.9222	intergenic
Pf3D7_12_v3	674416	674680	Troph_H3K4_peak_1667	32	.	1.75585	4.53568	3.2732	PF3D7_1217000		conserved protein, unknown function	PF3D7_1217100	SPO11	meiotic recombination protein SPO11, putative
Pf3D7_12_v3	687058	687720	Troph_H3K4_peak_1668	278	.	3.15675	29.853	27.8206	intergenic
Pf3D7_12_v3	705246	705833	Troph_H3K4_peak_1669	86	.	2.30698	10.1403	8.64123	PF3D7_1218100		conserved Plasmodium protein, unknown function
Pf3D7_12_v3	755398	755665	Troph_H3K4_peak_1670	69	.	2.13799	8.35056	6.90989	intergenic
Pf3D7_12_v3	764333	767333	Troph_H3K4_peak_1671	116	.	2.37177	13.2966	11.6764	PF3D7_1219300	VAR	erythrocyte membrane protein 1, PfEMP1
Pf3D7_12_v3	768637	774451	Troph_H3K4_peak_1672	283	.	3.38097	30.4657	28.3731	intergenic
Pf3D7_12_v3	775078	775426	Troph_H3K4_peak_1673	616	.	5.09748	64.2827	61.6979	intergenic
Pf3D7_12_v3	775821	785621	Troph_H3K4_peak_1674	138	.	2.44177	15.5162	13.8753	intergenic
Pf3D7_12_v3	822462	824305	Troph_H3K4_peak_1675	58	.	2.01722	7.27853	5.8984	PF3D7_1220700		conserved Plasmodium protein, unknown function
Pf3D7_12_v3	828527	829043	Troph_H3K4_peak_1676	76	.	2.17566	9.10827	7.63584	intergenic
Pf3D7_12_v3	835854	836286	Troph_H3K4_peak_1677	59	.	2.07097	7.29102	5.90288	PF3D7_1221000	SET10	histone-lysine N-methyltransferase, H3 lysine-4 specific
Pf3D7_12_v3	846138	846569	Troph_H3K4_peak_1678	59	.	2.06687	7.3523	5.96787	PF3D7_1221100		conserved Plasmodium protein, unknown function
Pf3D7_12_v3	851510	851765	Troph_H3K4_peak_1679	15	.	1.50347	2.72299	1.58554	PF3D7_1221300		conserved Plasmodium protein, unknown function
Pf3D7_12_v3	855257	855855	Troph_H3K4_peak_1680	67	.	2.08598	8.19278	6.76963	intergenic
Pf3D7_12_v3	875976	876530	Troph_H3K4_peak_1681	24	.	1.62581	3.60146	2.40704	PF3D7_1222000		tRNA-splicing ligase RtcB, putative
Pf3D7_12_v3	901784	902069	Troph_H3K4_peak_1682	12	.	1.48246	2.30928	1.21156	intergenic
Pf3D7_12_v3	903494	916372	Troph_H3K4_peak_1683	122	.	2.42318	13.8387	12.2031	intergenic
Pf3D7_12_v3	916822	917756	Troph_H3K4_peak_1684	122	.	2.49167	13.889	12.2578	PF3D7_1222700	GAP45	glideosome-associated protein 45
Pf3D7_12_v3	929844	930089	Troph_H3K4_peak_1685	39	.	1.86343	5.22585	3.93362	intergenic
Pf3D7_12_v3	931139	931502	Troph_H3K4_peak_1686	33	.	1.78929	4.59073	3.3283	PF3D7_1223200		nucleus export protein BRR6, putative
Pf3D7_12_v3	984999	985322	Troph_H3K4_peak_1687	42	.	1.83097	5.5566	4.24094	PF3D7_1224300	PABP1	polyadenylate-binding protein 1, putative
Pf3D7_12_v3	989448	989698	Troph_H3K4_peak_1688	24	.	1.55206	3.65955	2.44971	intergenic
Pf3D7_12_v3	990300	991199	Troph_H3K4_peak_1689	15	.	1.43959	2.7238	1.58799	intergenic
Pf3D7_12_v3	1001471	1001750	Troph_H3K4_peak_1690	27	.	1.65911	4.01325	2.7824	intergenic
Pf3D7_12_v3	1029907	1030574	Troph_H3K4_peak_1691	75	.	2.0545	8.98322	7.51776	intergenic
Pf3D7_12_v3	1031796	1032629	Troph_H3K4_peak_1692	18	.	1.56142	3.06119	1.8971	PF3D7_1225400		rRNA-processing protein, putative	PF3D7_1225500		small subunit rRNA processing factor, putative
Pf3D7_12_v3	1057110	1057639	Troph_H3K4_peak_1693	174	.	2.75025	19.2243	17.4368	PF3D7_1226100	HAD3	haloacid dehalogenase-like hydrolase, putative
Pf3D7_12_v3	1059005	1059540	Troph_H3K4_peak_1694	13	.	1.4302	2.47178	1.35843	PF3D7_1226200		conserved Plasmodium protein, unknown function
Pf3D7_12_v3	1061791	1062042	Troph_H3K4_peak_1695	22	.	1.61595	3.40874	2.22138	intergenic
Pf3D7_12_v3	1121990	1123272	Troph_H3K4_peak_1696	30	.	1.72122	4.26246	3.02998	intergenic
Pf3D7_12_v3	1145684	1146053	Troph_H3K4_peak_1697	35	.	1.71398	4.80951	3.53203	intergenic
Pf3D7_12_v3	1154379	1154606	Troph_H3K4_peak_1698	34	.	1.73913	4.7481	3.47226	intergenic
Pf3D7_12_v3	1163473	1164424	Troph_H3K4_peak_1699	327	.	3.67594	34.8642	32.7122	PF3D7_1228700		conserved Plasmodium protein, unknown function
Pf3D7_12_v3	1174054	1174528	Troph_H3K4_peak_1700	11	.	1.43371	2.29431	1.19889	intergenic
Pf3D7_12_v3	1201594	1203100	Troph_H3K4_peak_1701	49	.	1.88155	6.22749	4.91956	intergenic
Pf3D7_12_v3	1203764	1204017	Troph_H3K4_peak_1702	13	.	1.48394	2.4549	1.3436	intergenic
Pf3D7_12_v3	1209301	1209647	Troph_H3K4_peak_1703	32	.	1.68309	4.52608	3.26156	intergenic
Pf3D7_12_v3	1214699	1215376	Troph_H3K4_peak_1704	28	.	1.62077	4.04862	2.82083	intergenic
Pf3D7_12_v3	1227263	1227682	Troph_H3K4_peak_1705	16	.	1.54258	2.79112	1.65143	PF3D7_1229900		conserved Plasmodium protein, unknown function
Pf3D7_12_v3	1238100	1238596	Troph_H3K4_peak_1706	98	.	2.19916	11.4426	9.89223	intergenic
Pf3D7_12_v3	1251956	1252212	Troph_H3K4_peak_1707	26	.	1.59496	3.89222	2.67474	PF3D7_1230400	ClpQ	ATP-dependent protease subunit ClpQ
Pf3D7_12_v3	1264985	1265224	Troph_H3K4_peak_1708	22	.	1.57887	3.49734	2.29843	intergenic
Pf3D7_12_v3	1268578	1268819	Troph_H3K4_peak_1709	28	.	1.65328	4.10812	2.87729	intergenic
Pf3D7_12_v3	1278567	1279058	Troph_H3K4_peak_1710	15	.	1.44456	2.6394	1.51025	PF3D7_1231200		conserved Plasmodium protein, unknown function
Pf3D7_12_v3	1280397	1280649	Troph_H3K4_peak_1711	24	.	1.67779	3.66005	2.44768	intergenic
Pf3D7_12_v3	1281515	1281881	Troph_H3K4_peak_1712	35	.	1.74381	4.87857	3.59558	intergenic
Pf3D7_12_v3	1286776	1288070	Troph_H3K4_peak_1713	42	.	1.76719	5.61595	4.29922	intergenic
Pf3D7_12_v3	1288671	1289331	Troph_H3K4_peak_1714	30	.	1.67551	4.28957	3.04763	intergenic
Pf3D7_12_v3	1291242	1291681	Troph_H3K4_peak_1715	27	.	1.61265	3.97251	2.74261	intergenic
Pf3D7_12_v3	1309197	1309680	Troph_H3K4_peak_1716	47	.	1.88458	6.10032	4.75501	intergenic
Pf3D7_12_v3	1311013	1311375	Troph_H3K4_peak_1717	48	.	1.96106	6.21997	4.87835	intergenic
Pf3D7_12_v3	1333941	1334886	Troph_H3K4_peak_1718	173	.	2.55445	19.0782	17.3009	intergenic
Pf3D7_12_v3	1355170	1355477	Troph_H3K4_peak_1719	23	.	1.58944	3.51724	2.3187	PF3D7_1233000	EF-G	elongation factor G
Pf3D7_12_v3	1359074	1359406	Troph_H3K4_peak_1720	16	.	1.53894	2.81476	1.67395	PF3D7_1233050	OST4	dolichyl-diphosphooligosaccharide--protein glycosyltransferase subunit OST4, putative	PF3D7_1233100		conserved protein, unknown function	PF3D7_1233200		conserved Plasmodium protein, unknown function
Pf3D7_12_v3	1370303	1370657	Troph_H3K4_peak_1721	26	.	1.64111	3.86646	2.64634	intergenic
Pf3D7_12_v3	1374072	1374299	Troph_H3K4_peak_1722	26	.	1.64811	3.82139	2.602	intergenic
Pf3D7_12_v3	1384025	1384691	Troph_H3K4_peak_1723	30	.	1.7406	4.32822	3.08763	intergenic
Pf3D7_12_v3	1430608	1430904	Troph_H3K4_peak_1724	37	.	1.73635	4.99112	3.70847	intergenic
Pf3D7_12_v3	1455900	1456192	Troph_H3K4_peak_1725	22	.	1.5726	3.45293	2.26167	intergenic
Pf3D7_12_v3	1462140	1462684	Troph_H3K4_peak_1726	106	.	2.28238	12.275	10.6893	PF3D7_1235100		conserved protein, unknown function
Pf3D7_12_v3	1463244	1463695	Troph_H3K4_peak_1727	27	.	1.6496	3.98323	2.76139	PF3D7_1235200	VP2	V-type K -independent H -translocating inorganic pyrophosphatase
Pf3D7_12_v3	1465625	1466212	Troph_H3K4_peak_1728	28	.	1.60178	4.13092	2.89623	intergenic
Pf3D7_12_v3	1468020	1468319	Troph_H3K4_peak_1729	32	.	1.72499	4.45837	3.20022	PF3D7_1235300	NOT4	CCR4-NOT transcription complex subunit 4, putative
Pf3D7_12_v3	1509595	1509895	Troph_H3K4_peak_1730	49	.	1.98165	6.27045	4.92063	intergenic
Pf3D7_12_v3	1511564	1511886	Troph_H3K4_peak_1731	77	.	2.25096	9.20263	7.72579	PF3D7_1236200		conserved Plasmodium protein, unknown function
Pf3D7_12_v3	1526283	1526700	Troph_H3K4_peak_1732	21	.	1.59617	3.36786	2.18483	PF3D7_1236600		p25-alpha family protein, putative
Pf3D7_12_v3	1528635	1529416	Troph_H3K4_peak_1733	38	.	1.80227	5.15761	3.86758	PF3D7_1236650		conserved Plasmodium protein, unknown function	PF3D7_1236700		S-adenosyl-methyltransferase, putative
Pf3D7_12_v3	1556681	1557777	Troph_H3K4_peak_1734	133	.	2.50019	14.9709	13.3458	PF3D7_1237300		conserved Plasmodium protein, unknown function
Pf3D7_12_v3	1559385	1559978	Troph_H3K4_peak_1735	16	.	1.49283	2.81326	1.66825	intergenic
Pf3D7_12_v3	1577449	1578397	Troph_H3K4_peak_1736	87	.	2.04131	10.2638	8.78572	PF3D7_1237900		conserved Plasmodium protein, unknown function
Pf3D7_12_v3	1587063	1587492	Troph_H3K4_peak_1737	14	.	1.45815	2.61793	1.49052	intergenic
Pf3D7_12_v3	1593305	1593572	Troph_H3K4_peak_1738	16	.	1.50285	2.75799	1.61799	PF3D7_1238500		conserved Plasmodium protein, unknown function
Pf3D7_12_v3	1607816	1608888	Troph_H3K4_peak_1739	59	.	2.03221	7.29185	5.90997	PF3D7_1238800	ACS11	acyl-CoA synthetase
Pf3D7_12_v3	1611511	1612693	Troph_H3K4_peak_1740	86	.	2.05829	10.1831	8.69313	PF3D7_1238900	PK2	protein kinase 2
Pf3D7_12_v3	1618120	1618779	Troph_H3K4_peak_1741	67	.	2.09173	8.12541	6.71427	intergenic
Pf3D7_12_v3	1624667	1625449	Troph_H3K4_peak_1742	39	.	1.85374	5.29449	3.99539	PF3D7_1239100		ribosomal protein L23, mitochondrial, putative
Pf3D7_12_v3	1629191	1629509	Troph_H3K4_peak_1743	137	.	2.72936	15.3989	13.7065	intergenic
Pf3D7_12_v3	1630295	1631079	Troph_H3K4_peak_1744	235	.	3.34758	25.4588	23.5102	intergenic
Pf3D7_12_v3	1652904	1653584	Troph_H3K4_peak_1745	32	.	1.69732	4.50419	3.25038	PF3D7_1239600	ThzK	hydroxyethylthiazole kinase
Pf3D7_12_v3	1683778	1684367	Troph_H3K4_peak_1746	14	.	1.45236	2.57606	1.45255	PF3D7_1240100	ETRAMP12	early transcribed membrane protein 12
Pf3D7_12_v3	1685048	1686419	Troph_H3K4_peak_1747	64	.	2.01239	7.80381	6.42401	PF3D7_1240100	ETRAMP12	early transcribed membrane protein 12
Pf3D7_12_v3	1687018	1687522	Troph_H3K4_peak_1748	29	.	1.7171	4.22854	2.98261	intergenic
Pf3D7_12_v3	1688199	1693134	Troph_H3K4_peak_1749	108	.	2.23693	12.4666	10.8894	intergenic
Pf3D7_12_v3	1693723	1700815	Troph_H3K4_peak_1750	102	.	2.25055	11.8616	10.2881	intergenic
Pf3D7_12_v3	1703272	1703605	Troph_H3K4_peak_1751	293	.	3.70376	31.4098	29.3191	PF3D7_1240400	VAR	erythrocyte membrane protein 1, PfEMP1
Pf3D7_12_v3	1704265	1707201	Troph_H3K4_peak_1752	177	.	2.79605	19.5413	17.7174	intergenic
Pf3D7_12_v3	1707675	1710095	Troph_H3K4_peak_1753	444	.	3.24882	46.8869	44.4989	intergenic
Pf3D7_12_v3	1710997	1712236	Troph_H3K4_peak_1754	58	.	2.05022	7.23534	5.84352	intergenic
Pf3D7_12_v3	1714040	1714481	Troph_H3K4_peak_1755	71	.	2.19863	8.59487	7.1476	intergenic
Pf3D7_12_v3	1719468	1725421	Troph_H3K4_peak_1756	239	.	2.76929	25.9338	23.9613	intergenic
Pf3D7_12_v3	1726604	1727387	Troph_H3K4_peak_1757	75	.	2.22991	9.00258	7.53696	intergenic
Pf3D7_12_v3	1729362	1729701	Troph_H3K4_peak_1758	74	.	2.21431	8.91514	7.45875	intergenic
Pf3D7_12_v3	1735286	1738357	Troph_H3K4_peak_1759	220	.	3.07632	24.0073	22.0749	intergenic
Pf3D7_12_v3	1738955	1740020	Troph_H3K4_peak_1760	23	.	1.59756	3.56339	2.36202	intergenic
Pf3D7_12_v3	1742784	1743494	Troph_H3K4_peak_1761	41	.	1.8458	5.41792	4.13213	intergenic
Pf3D7_12_v3	1771435	1771690	Troph_H3K4_peak_1762	22	.	1.65487	3.41782	2.22337	PF3D7_1241500		conserved Plasmodium protein, unknown function
Pf3D7_12_v3	1793565	1793922	Troph_H3K4_peak_1763	101	.	2.46901	11.7273	10.1528	PF3D7_1242300		conserved Plasmodium membrane protein, unknown function
Pf3D7_12_v3	1805930	1806827	Troph_H3K4_peak_1764	29	.	1.67558	4.19672	2.95663	intergenic
Pf3D7_12_v3	1823346	1824505	Troph_H3K4_peak_1765	68	.	2.02732	8.25723	6.82032	PF3D7_1243600		translation initiation factor SUI1, putative
Pf3D7_12_v3	1828464	1828930	Troph_H3K4_peak_1766	39	.	1.8218	5.1936	3.9038	PF3D7_1243700		ubiquitin-conjugating enzyme E2, putative
Pf3D7_12_v3	1829616	1829843	Troph_H3K4_peak_1767	23	.	1.58782	3.56736	2.3631	PF3D7_1243700		ubiquitin-conjugating enzyme E2, putative
Pf3D7_12_v3	1834054	1834412	Troph_H3K4_peak_1768	42	.	1.80526	5.55513	4.24056	PF3D7_1243900	DOC2	double C2-like domain-containing protein
Pf3D7_12_v3	1839461	1840578	Troph_H3K4_peak_1769	31	.	1.71934	4.42961	3.1742	intergenic
Pf3D7_12_v3	1852756	1853065	Troph_H3K4_peak_1770	49	.	1.87509	6.25761	4.91169	PF3D7_1244200	TFB2	RNA polymerase II transcription factor B subunit 2, putative
Pf3D7_12_v3	1857717	1858097	Troph_H3K4_peak_1771	119	.	2.1123	13.5708	11.9355	intergenic
Pf3D7_12_v3	1858853	1859288	Troph_H3K4_peak_1772	28	.	1.62423	4.13519	2.89474	PF3D7_1244400		RNA-binding protein, putative
Pf3D7_12_v3	1871713	1872788	Troph_H3K4_peak_1773	180	.	2.93272	19.9146	18.0944	PF3D7_1244800		translation machinery-associated protein 46, putative
Pf3D7_12_v3	1874305	1874865	Troph_H3K4_peak_1774	27	.	1.61368	3.93912	2.71992	PF3D7_1244900		conserved Plasmodium protein, unknown function
Pf3D7_12_v3	1897490	1897840	Troph_H3K4_peak_1775	14	.	1.51665	2.60216	1.47622	PF3D7_1245500		conserved Plasmodium protein, unknown function
Pf3D7_12_v3	1898426	1898751	Troph_H3K4_peak_1776	52	.	2.01283	6.60085	5.23917	intergenic
Pf3D7_12_v3	1924946	1925713	Troph_H3K4_peak_1777	54	.	2.01133	6.82678	5.46779	PF3D7_1246300	KIC4	protein KIC4
Pf3D7_12_v3	1929771	1929998	Troph_H3K4_peak_1778	38	.	1.81852	5.1681	3.86854	intergenic
Pf3D7_12_v3	1932166	1932483	Troph_H3K4_peak_1779	27	.	1.64758	3.94384	2.71885	intergenic
Pf3D7_12_v3	1945511	1945809	Troph_H3K4_peak_1780	73	.	2.21345	8.75724	7.30295	PF3D7_1247000	FBXO9	F-box only protein 9 homolog, putative
Pf3D7_12_v3	1966988	1967662	Troph_H3K4_peak_1781	17	.	1.55304	2.87651	1.7293	PF3D7_1247800	DPAP2	dipeptidyl aminopeptidase 2
Pf3D7_12_v3	1981930	1982273	Troph_H3K4_peak_1782	31	.	1.65817	4.37709	3.12642	PF3D7_1248400		conserved Plasmodium protein, unknown function	PF3D7_1248500		bax inhibitor 1, putative
Pf3D7_12_v3	1983588	1984382	Troph_H3K4_peak_1783	33	.	1.68323	4.64214	3.37213	PF3D7_1248500		bax inhibitor 1, putative
Pf3D7_12_v3	1985988	1986217	Troph_H3K4_peak_1784	27	.	1.65936	3.9313	2.70337	intergenic
Pf3D7_12_v3	1991146	1991811	Troph_H3K4_peak_1785	48	.	1.94487	6.21441	4.87648	intergenic
Pf3D7_12_v3	2014838	2015536	Troph_H3K4_peak_1786	19	.	1.49969	3.07167	1.90994	PF3D7_1249400		conserved Plasmodium protein, unknown function
Pf3D7_12_v3	2016334	2016620	Troph_H3K4_peak_1787	63	.	2.01482	7.79772	6.37441	PF3D7_1249400		conserved Plasmodium protein, unknown function	PF3D7_1249500		protein CutA, putative
Pf3D7_12_v3	2023203	2023953	Troph_H3K4_peak_1788	461	.	4.12361	48.415	46.1779	PF3D7_1249700		conserved Plasmodium protein, unknown function
Pf3D7_12_v3	2025803	2026032	Troph_H3K4_peak_1789	18	.	1.54196	2.99998	1.83936	intergenic
Pf3D7_12_v3	2027004	2027478	Troph_H3K4_peak_1790	82	.	2.2218	9.70054	8.22286	intergenic
Pf3D7_12_v3	2029939	2030190	Troph_H3K4_peak_1791	27	.	1.66801	4.03262	2.79568	PF3D7_1249800	THO2	THO complex subunit 2, putative
Pf3D7_12_v3	2088028	2088265	Troph_H3K4_peak_1792	21	.	1.64142	3.34845	2.15998	intergenic
Pf3D7_12_v3	2089516	2090269	Troph_H3K4_peak_1793	108	.	2.42951	12.3984	10.8424	PF3D7_1251100		conserved Plasmodium protein, unknown function
Pf3D7_12_v3	2092895	2093354	Troph_H3K4_peak_1794	18	.	1.52777	3.05828	1.8955	intergenic
Pf3D7_12_v3	2095323	2095669	Troph_H3K4_peak_1795	14	.	1.49875	2.56094	1.43947	PF3D7_1251300	TMK	thymidylate kinase
Pf3D7_12_v3	2105033	2105278	Troph_H3K4_peak_1796	29	.	1.67812	4.21354	2.97273	PF3D7_1251700	aTrpRS	tryptophan--tRNA ligase
Pf3D7_12_v3	2111791	2112078	Troph_H3K4_peak_1797	47	.	1.86401	6.12159	4.77703	intergenic
Pf3D7_12_v3	2112759	2113934	Troph_H3K4_peak_1798	126	.	2.22641	14.2664	12.6154	PF3D7_1252100	RON3	rhoptry neck protein 3
Pf3D7_12_v3	2123177	2124327	Troph_H3K4_peak_1799	64	.	2.04103	7.81903	6.43255	intergenic
Pf3D7_12_v3	2129742	2131045	Troph_H3K4_peak_1800	60	.	2.06001	7.437	6.05228	intergenic
Pf3D7_12_v3	2135351	2135697	Troph_H3K4_peak_1801	113	.	2.49162	12.9227	11.3158	intergenic
Pf3D7_12_v3	2138789	2139226	Troph_H3K4_peak_1802	95	.	2.13099	11.0755	9.55048	intergenic
Pf3D7_12_v3	2148502	2149056	Troph_H3K4_peak_1803	45	.	1.90622	5.85172	4.52711	intergenic
Pf3D7_12_v3	2152737	2153010	Troph_H3K4_peak_1804	38	.	1.82068	5.1378	3.84353	PF3D7_1252700		Plasmodium exported protein (PHISTb), unknown function
Pf3D7_12_v3	2158676	2158949	Troph_H3K4_peak_1805	51	.	1.94163	6.50758	5.14261	PF3D7_1252800		Plasmodium exported protein (PHISTb), unknown function
Pf3D7_12_v3	2162437	2162977	Troph_H3K4_peak_1806	31	.	1.69713	4.39526	3.15027	PF3D7_1252900		Plasmodium exported protein, unknown function
Pf3D7_12_v3	2166295	2167609	Troph_H3K4_peak_1807	93	.	2.21198	10.813	9.32577	PF3D7_1253000	GECO	gametocyte erythrocyte cytosolic protein
Pf3D7_12_v3	2186014	2190085	Troph_H3K4_peak_1808	81	.	2.11528	9.64964	8.19133	intergenic
Pf3D7_12_v3	2190494	2195825	Troph_H3K4_peak_1809	94	.	2.20648	10.9526	9.44025	intergenic
Pf3D7_12_v3	2201619	2202681	Troph_H3K4_peak_1810	166	.	2.87583	18.4052	16.6061	PF3D7_1254000	RIF	rifin
Pf3D7_12_v3	2205304	2206282	Troph_H3K4_peak_1811	65	.	2.05759	7.92341	6.53817	intergenic
Pf3D7_12_v3	2208347	2209224	Troph_H3K4_peak_1812	52	.	1.92261	6.63519	5.26701	PF3D7_1254200	RIF	rifin
Pf3D7_12_v3	2213383	2213663	Troph_H3K4_peak_1813	15	.	1.53594	2.65361	1.52119	intergenic
Pf3D7_12_v3	2214882	2216232	Troph_H3K4_peak_1814	73	.	2.11921	8.85591	7.39123	PF3D7_1254400	RIF	rifin
Pf3D7_12_v3	2217295	2220937	Troph_H3K4_peak_1815	166	.	2.64929	18.3153	16.6215	PF3D7_1254500	RIF	rifin
Pf3D7_12_v3	2222788	2225663	Troph_H3K4_peak_1816	50	.	1.89972	6.38908	5.04611	PF3D7_1254700	RIF	rifin
Pf3D7_12_v3	2226331	2227012	Troph_H3K4_peak_1817	63	.	2.06477	7.7547	6.34176	intergenic
Pf3D7_12_v3	2228373	2229453	Troph_H3K4_peak_1818	91	.	2.25266	10.6624	9.1187	PF3D7_1254800	RIF	rifin
Pf3D7_12_v3	2234952	2235766	Troph_H3K4_peak_1819	280	.	3.43307	30.0824	28.007	PF3D7_1255000	RIF	rifin
Pf3D7_12_v3	2238626	2239398	Troph_H3K4_peak_1820	129	.	2.56587	14.6512	12.9719	PF3D7_1255100	RIF	rifin
Pf3D7_12_v3	2243353	2249150	Troph_H3K4_peak_1821	325	.	3.50057	34.6932	32.514	intergenic
Pf3D7_12_v3	2249908	2250738	Troph_H3K4_peak_1822	130	.	2.65726	14.6701	13.0128	intergenic
Pf3D7_12_v3	2251204	2251778	Troph_H3K4_peak_1823	595	.	5.10923	62.1517	59.5967	intergenic
Pf3D7_12_v3	2259430	2262892	Troph_H3K4_peak_1824	241	.	3.31462	26.0641	24.1306	intergenic
Pf3D7_12_v3	2265302	2265529	Troph_H3K4_peak_1825	49	.	1.99502	6.3185	4.96172	intergenic
Pf3D7_13_v3	23980	26630	Troph_H3K4_peak_1826	145	.	2.62323	16.2084	14.5091	intergenic
Pf3D7_13_v3	30700	31371	Troph_H3K4_peak_1827	162	.	2.90458	18.0665	16.2811	PF3D7_1300200	RIF	rifin
Pf3D7_13_v3	34983	35294	Troph_H3K4_peak_1828	87	.	2.34994	10.3164	8.79696	intergenic
Pf3D7_13_v3	35790	45001	Troph_H3K4_peak_1829	128	.	2.47104	14.5107	12.8441	intergenic
Pf3D7_13_v3	51060	51802	Troph_H3K4_peak_1830	91	.	2.29628	10.643	9.10762	PF3D7_1300500	RIF	rifin
Pf3D7_13_v3	54199	54772	Troph_H3K4_peak_1831	88	.	2.2888	10.3326	8.80651	PF3D7_1300600	RIF	rifin
Pf3D7_13_v3	57118	58151	Troph_H3K4_peak_1832	104	.	2.36336	12.0605	10.4833	PF3D7_1300700	RIF	rifin
Pf3D7_13_v3	62524	63153	Troph_H3K4_peak_1833	100	.	2.33209	11.5756	10.017	PF3D7_1300900		stevor
Pf3D7_13_v3	73884	78147	Troph_H3K4_peak_1834	68	.	2.11415	8.26361	6.83811	intergenic
Pf3D7_13_v3	78649	79258	Troph_H3K4_peak_1835	38	.	1.74075	5.16772	3.88422	intergenic
Pf3D7_13_v3	81428	81815	Troph_H3K4_peak_1836	16	.	1.54632	2.80719	1.66534	PF3D7_1301400	HYP12	Plasmodium exported protein (hyp12), unknown function
Pf3D7_13_v3	87540	87773	Troph_H3K4_peak_1837	27	.	1.69665	3.97988	2.75153	PF3D7_1301600	EBA140	erythrocyte binding antigen-140
Pf3D7_13_v3	93561	93795	Troph_H3K4_peak_1838	43	.	1.89495	5.65419	4.32823	intergenic
Pf3D7_13_v3	99820	100385	Troph_H3K4_peak_1839	54	.	1.9641	6.84725	5.48617	intergenic
Pf3D7_13_v3	101540	101816	Troph_H3K4_peak_1840	34	.	1.80086	4.68448	3.41107	intergenic
Pf3D7_13_v3	112863	113764	Troph_H3K4_peak_1841	680	.	4.71262	70.5174	68.0256	intergenic
Pf3D7_13_v3	115469	115818	Troph_H3K4_peak_1842	51	.	1.96518	6.45448	5.1012	intergenic
Pf3D7_13_v3	116634	116936	Troph_H3K4_peak_1843	20	.	1.6277	3.23403	2.05639	intergenic
Pf3D7_13_v3	117713	118182	Troph_H3K4_peak_1844	148	.	2.80308	16.621	14.8964	PF3D7_1302050		hypothetical protein
Pf3D7_13_v3	120324	120650	Troph_H3K4_peak_1845	36	.	1.83644	4.95194	3.67053	PF3D7_1302100	G27/25	gamete antigen 27/25
Pf3D7_13_v3	124951	125492	Troph_H3K4_peak_1846	36	.	1.84352	4.97164	3.68526	PF3D7_1302300		Plasmodium exported protein, unknown function
Pf3D7_13_v3	142912	143225	Troph_H3K4_peak_1847	21	.	1.55873	3.30907	2.12379	PF3D7_1302600	DOHH	deoxyhypusine hydroxylase
Pf3D7_13_v3	162009	162537	Troph_H3K4_peak_1848	13	.	1.50169	2.42213	1.31404	PF3D7_1303300		conserved Plasmodium protein, unknown function
Pf3D7_13_v3	183931	184314	Troph_H3K4_peak_1849	11	.	1.42386	2.20431	1.11875	PF3D7_1303800		conserved Plasmodium protein, unknown function
Pf3D7_13_v3	214677	215119	Troph_H3K4_peak_1850	45	.	1.88836	5.88968	4.56199	PF3D7_1303900		GINS complex subunit Psf3, putative
Pf3D7_13_v3	235823	236095	Troph_H3K4_peak_1851	32	.	1.66946	4.48487	3.22439	PF3D7_1304500		small heat shock protein, putative	PF3D7_1304600		conserved Plasmodium protein, unknown function
Pf3D7_13_v3	268726	268957	Troph_H3K4_peak_1852	39	.	1.8076	5.27773	3.9815	PF3D7_1305400		AAR2 protein, putative
Pf3D7_13_v3	278397	278938	Troph_H3K4_peak_1853	23	.	1.63473	3.54717	2.34773	PF3D7_1305800		conserved Plasmodium protein, unknown function	PF3D7_1305900		conserved Plasmodium protein, unknown function
Pf3D7_13_v3	282579	283007	Troph_H3K4_peak_1854	15	.	1.49744	2.67233	1.54272	PF3D7_1306000		conserved Plasmodium protein, unknown function
Pf3D7_13_v3	301311	301623	Troph_H3K4_peak_1855	28	.	1.63291	4.11247	2.87361	intergenic
Pf3D7_13_v3	306939	307183	Troph_H3K4_peak_1856	30	.	1.67041	4.31239	3.06543	intergenic
Pf3D7_13_v3	325564	326155	Troph_H3K4_peak_1857	84	.	2.05406	9.90505	8.42067	intergenic
Pf3D7_13_v3	336774	337644	Troph_H3K4_peak_1858	86	.	2.20102	10.1019	8.61506	PF3D7_1307500		conserved Plasmodium protein, unknown function
Pf3D7_13_v3	339965	340889	Troph_H3K4_peak_1859	29	.	1.65774	4.21223	2.97685	PF3D7_1307600	rpoA	DNA-directed RNA polymerase subunit alpha, putative
Pf3D7_13_v3	355676	355954	Troph_H3K4_peak_1860	29	.	1.73518	4.2296	2.9972	PF3D7_1308000		conserved Plasmodium membrane protein, unknown function
Pf3D7_13_v3	360200	360535	Troph_H3K4_peak_1861	29	.	1.67138	4.18033	2.94322	PF3D7_1308100		CCAAT-binding transcription factor, putative	PF3D7_1308200	cpsSII	carbamoyl phosphate synthetase
Pf3D7_13_v3	370907	371682	Troph_H3K4_peak_1862	75	.	2.20449	8.9744	7.50384	PF3D7_1308300	RPS27	40S ribosomal protein S27
Pf3D7_13_v3	447498	447764	Troph_H3K4_peak_1863	13	.	1.44484	2.48943	1.37442	PF3D7_1309900		succinate dehydrogenase assembly factor 2, putative
Pf3D7_13_v3	469458	469835	Troph_H3K4_peak_1864	115	.	2.47714	13.115	11.5064	PF3D7_1310800		tetratricopeptide repeat protein, putative
Pf3D7_13_v3	476300	476953	Troph_H3K4_peak_1865	15	.	1.46769	2.656	1.52628	PF3D7_1310900		ribosomal protein S15, mitochondrial, putative	PF3D7_1311000	ISD11	protein ISD11
Pf3D7_13_v3	478326	478990	Troph_H3K4_peak_1866	51	.	1.96612	6.46498	5.11703	PF3D7_1311100		meiosis-specific nuclear structural protein 1, putative
Pf3D7_13_v3	480446	480706	Troph_H3K4_peak_1867	20	.	1.56903	3.23315	2.05627	PF3D7_1311200		transducin beta-like protein TBL1, putative
Pf3D7_13_v3	484894	485344	Troph_H3K4_peak_1868	50	.	1.97573	6.43102	5.07652	intergenic
Pf3D7_13_v3	488394	488800	Troph_H3K4_peak_1869	43	.	1.82786	5.7091	4.38444	PF3D7_1311500	RPT1	26S protease regulatory subunit 7, putative
Pf3D7_13_v3	496073	496323	Troph_H3K4_peak_1870	44	.	1.84993	5.74819	4.41803	intergenic
Pf3D7_13_v3	501274	501698	Troph_H3K4_peak_1871	18	.	1.57098	3.00904	1.84782	intergenic
Pf3D7_13_v3	508992	509364	Troph_H3K4_peak_1872	44	.	1.75606	5.73642	4.40753	intergenic
Pf3D7_13_v3	510543	510867	Troph_H3K4_peak_1873	77	.	2.19241	9.18928	7.71296	PF3D7_1312000	MCAT	malonyl CoA-acyl carrier protein transacylase
Pf3D7_13_v3	524867	525344	Troph_H3K4_peak_1874	300	.	3.48043	32.0809	30.0056	PF3D7_1312450	ARA1	apical ring associated protein 1, putative	PF3D7_1312500		conserved Plasmodium protein, unknown function
Pf3D7_13_v3	526743	527072	Troph_H3K4_peak_1875	23	.	1.53638	3.52395	2.32355	intergenic
Pf3D7_13_v3	527914	528170	Troph_H3K4_peak_1876	35	.	1.79554	4.78043	3.50367	intergenic
Pf3D7_13_v3	530413	530891	Troph_H3K4_peak_1877	22	.	1.54354	3.42995	2.24065	intergenic
Pf3D7_13_v3	534499	535995	Troph_H3K4_peak_1878	18	.	1.56298	2.96947	1.81612	intergenic
Pf3D7_13_v3	545307	546276	Troph_H3K4_peak_1879	18	.	1.57331	3.03149	1.87399	intergenic
Pf3D7_13_v3	547317	547617	Troph_H3K4_peak_1880	96	.	2.40454	11.1888	9.63739	PF3D7_1312900	EIF4G	eukaryotic translation initation factor 4 gamma
Pf3D7_13_v3	553604	554271	Troph_H3K4_peak_1881	29	.	1.72709	4.16375	2.92587	PF3D7_1313000	NEDD8	ubiquitin-like protein Nedd8
Pf3D7_13_v3	555404	556656	Troph_H3K4_peak_1882	59	.	1.99089	7.35671	5.98127	PF3D7_1313100		conserved Plasmodium protein, unknown function
Pf3D7_13_v3	569018	569517	Troph_H3K4_peak_1883	15	.	1.50448	2.67745	1.54543	PF3D7_1313300		peptidyl-prolyl cis-trans isomerase, putative	PF3D7_1313400		DEAD box helicase, putative
Pf3D7_13_v3	571852	572258	Troph_H3K4_peak_1884	28	.	1.65552	4.07466	2.83835	intergenic
Pf3D7_13_v3	579044	579308	Troph_H3K4_peak_1885	46	.	1.83565	5.93398	4.60407	PF3D7_1313600		Clu domain-containing protein, putative
Pf3D7_13_v3	631518	631946	Troph_H3K4_peak_1886	16	.	1.56533	2.8395	1.69314	PF3D7_1314900	P44	general transcription factor IIH subunit 2
Pf3D7_13_v3	643945	644210	Troph_H3K4_peak_1887	75	.	2.1808	9.03557	7.56472	PF3D7_1315300		conserved protein, unknown function
Pf3D7_13_v3	652033	652267	Troph_H3K4_peak_1888	46	.	1.95465	5.94833	4.60835	PF3D7_1315500		conserved protein, unknown function
Pf3D7_13_v3	655076	655505	Troph_H3K4_peak_1889	49	.	1.94996	6.2543	4.9171	PF3D7_1315600	PIS	CDP-diacylglycerol--inositol 3-phosphatidyltransferase
Pf3D7_13_v3	668915	669557	Troph_H3K4_peak_1890	23	.	1.5975	3.56114	2.35933	intergenic
Pf3D7_13_v3	707705	707972	Troph_H3K4_peak_1891	59	.	2.0635	7.35035	5.95047	PF3D7_1317000	USP39	U4/U6.U5 tri-snRNP-associated protein 2, putative
Pf3D7_13_v3	715846	716524	Troph_H3K4_peak_1892	89	.	2.29355	10.4225	8.93018	intergenic
Pf3D7_13_v3	717593	717912	Troph_H3K4_peak_1893	96	.	2.4085	11.1487	9.60174	intergenic
Pf3D7_13_v3	733134	733848	Troph_H3K4_peak_1894	197	.	2.81168	21.5531	19.7269	PF3D7_1317400		zinc finger protein, putative
Pf3D7_13_v3	748363	748654	Troph_H3K4_peak_1895	43	.	1.80144	5.69137	4.37183	PF3D7_1318100	FD	ferredoxin
Pf3D7_13_v3	751179	752904	Troph_H3K4_peak_1896	38	.	1.78793	5.0889	3.81946	PF3D7_1318300		conserved Plasmodium protein, unknown function
Pf3D7_13_v3	759195	759612	Troph_H3K4_peak_1897	36	.	1.75853	4.89831	3.6161	PF3D7_1318400	SMC2	structural maintenance of chromosomes protein 2, putative
Pf3D7_13_v3	772574	772848	Troph_H3K4_peak_1898	19	.	1.51871	3.10181	1.93464	PF3D7_1318800	SEC63	translocation protein SEC63, putative
Pf3D7_13_v3	773278	773794	Troph_H3K4_peak_1899	38	.	1.75375	5.0943	3.80987	PF3D7_1318800	SEC63	translocation protein SEC63, putative
Pf3D7_13_v3	778705	779483	Troph_H3K4_peak_1900	59	.	1.98057	7.34901	5.97236	PF3D7_1318900		conserved Plasmodium protein, unknown function
Pf3D7_13_v3	790595	791127	Troph_H3K4_peak_1901	68	.	2.0296	8.26666	6.84168	intergenic
Pf3D7_13_v3	809271	809593	Troph_H3K4_peak_1902	24	.	1.66954	3.63853	2.4446	intergenic
Pf3D7_13_v3	814713	815111	Troph_H3K4_peak_1903	102	.	2.32404	11.8094	10.2402	PF3D7_1319700		protein phosphatase PP2A regulatory subunit A, putative
Pf3D7_13_v3	827641	828283	Troph_H3K4_peak_1904	42	.	1.81884	5.52644	4.22244	intergenic
Pf3D7_13_v3	855245	855843	Troph_H3K4_peak_1905	155	.	2.5451	17.2842	15.5559	PF3D7_1320800		dihydrolipoyllysine-residue succinyltransferase component of 2-oxoglutarate dehydrogenase complex
Pf3D7_13_v3	858563	858884	Troph_H3K4_peak_1906	44	.	1.85333	5.75852	4.43703	PF3D7_1321000		conserved Plasmodium protein, unknown function
Pf3D7_13_v3	875623	875890	Troph_H3K4_peak_1907	58	.	2.0343	7.2171	5.82283	PF3D7_1321200		zinc finger protein, putative	PF3D7_1321300		conserved Plasmodium membrane protein, unknown function
Pf3D7_13_v3	896339	896892	Troph_H3K4_peak_1908	15	.	1.51884	2.63422	1.50471	intergenic
Pf3D7_13_v3	905783	906533	Troph_H3K4_peak_1909	38	.	1.85262	5.13502	3.8413	intergenic
Pf3D7_13_v3	919126	919373	Troph_H3K4_peak_1910	19	.	1.57331	3.06203	1.90149	intergenic
Pf3D7_13_v3	921006	921601	Troph_H3K4_peak_1911	47	.	1.86849	6.06768	4.72879	PF3D7_1322100	SET2	histone-lysine N-methyltransferase SET2
Pf3D7_13_v3	954200	954427	Troph_H3K4_peak_1912	44	.	1.8377	5.78018	4.4504	intergenic
Pf3D7_13_v3	962876	963723	Troph_H3K4_peak_1913	21	.	1.62304	3.32524	2.14509	PF3D7_1323000	FabZ	beta-hydroxyacyl-ACP dehydratase
Pf3D7_13_v3	966814	967094	Troph_H3K4_peak_1914	18	.	1.60654	3.05572	1.88707	PF3D7_1323200		V-type proton ATPase subunit G, putative
Pf3D7_13_v3	973515	973745	Troph_H3K4_peak_1915	40	.	1.86579	5.32286	4.01676	PF3D7_1323500	PMV	plasmepsin V
Pf3D7_13_v3	980395	980687	Troph_H3K4_peak_1916	93	.	2.31946	10.8599	9.32188	intergenic
Pf3D7_13_v3	993967	994197	Troph_H3K4_peak_1917	28	.	1.65792	4.12414	2.88596	intergenic
Pf3D7_13_v3	995691	995994	Troph_H3K4_peak_1918	13	.	1.45552	2.46556	1.35334	intergenic
Pf3D7_13_v3	998924	999458	Troph_H3K4_peak_1919	24	.	1.62295	3.64899	2.4485	PF3D7_1324200		micro-fibrillar-associated protein, putative
Pf3D7_13_v3	1026620	1026923	Troph_H3K4_peak_1920	79	.	2.23555	9.45442	7.97396	intergenic
Pf3D7_13_v3	1039499	1040563	Troph_H3K4_peak_1921	293	.	3.29971	31.2776	29.3588	PF3D7_1324900	LDH	L-lactate dehydrogenase
Pf3D7_13_v3	1044938	1045586	Troph_H3K4_peak_1922	135	.	2.34054	15.2466	13.5696	intergenic
Pf3D7_13_v3	1049063	1049491	Troph_H3K4_peak_1923	61	.	1.96307	7.57396	6.1828	intergenic
Pf3D7_13_v3	1049985	1050535	Troph_H3K4_peak_1924	23	.	1.66138	3.50044	2.30643	PF3D7_1325300		conserved Plasmodium protein, unknown function
Pf3D7_13_v3	1086044	1086481	Troph_H3K4_peak_1925	54	.	1.91728	6.783	5.4094	PF3D7_1326000	C3AP2	respiratory chain complex 3 associated protein 2	PF3D7_1326100		WD repeat-containing protein, putative
Pf3D7_13_v3	1101280	1101865	Troph_H3K4_peak_1926	59	.	1.92663	7.3377	5.93977	intergenic
Pf3D7_13_v3	1140060	1140521	Troph_H3K4_peak_1927	75	.	2.06685	9.04176	7.58045	intergenic
Pf3D7_13_v3	1141618	1142111	Troph_H3K4_peak_1928	129	.	2.49231	14.6098	12.9606	intergenic
Pf3D7_13_v3	1146991	1148076	Troph_H3K4_peak_1929	24	.	1.59285	3.61573	2.41698	intergenic
Pf3D7_13_v3	1150724	1151047	Troph_H3K4_peak_1930	37	.	1.74974	5.01102	3.72508	intergenic
Pf3D7_13_v3	1153392	1154529	Troph_H3K4_peak_1931	25	.	1.6752	3.71842	2.51148	PF3D7_1327500		conserved protein, unknown function
Pf3D7_13_v3	1163326	1164064	Troph_H3K4_peak_1932	14	.	1.43316	2.60241	1.47838	intergenic
Pf3D7_13_v3	1165209	1165595	Troph_H3K4_peak_1933	23	.	1.58833	3.53925	2.34051	PF3D7_1327900		conserved Plasmodium protein, unknown function
Pf3D7_13_v3	1166193	1166619	Troph_H3K4_peak_1934	11	.	1.43957	2.20674	1.12108	intergenic
Pf3D7_13_v3	1167192	1167706	Troph_H3K4_peak_1935	41	.	1.79441	5.49133	4.18063	intergenic
Pf3D7_13_v3	1170617	1171473	Troph_H3K4_peak_1936	28	.	1.62833	4.12881	2.899	intergenic
Pf3D7_13_v3	1172645	1173612	Troph_H3K4_peak_1937	25	.	1.64625	3.80082	2.58543	PF3D7_1328000		conserved Plasmodium protein, unknown function
Pf3D7_13_v3	1209209	1209523	Troph_H3K4_peak_1938	115	.	2.50717	13.1196	11.5049	PF3D7_1328600		conserved Plasmodium protein, unknown function
Pf3D7_13_v3	1210734	1211986	Troph_H3K4_peak_1939	27	.	1.6958	4.00406	2.78206	intergenic
Pf3D7_13_v3	1213419	1214461	Troph_H3K4_peak_1940	51	.	1.94746	6.45432	5.11494	PF3D7_1328800	SIR2A	transcriptional regulatory protein sir2a	PF3D7_1328900		PUB domain-containing protein, putative
Pf3D7_13_v3	1214913	1215143	Troph_H3K4_peak_1941	16	.	1.49505	2.82537	1.67956	PF3D7_1328900		PUB domain-containing protein, putative
Pf3D7_13_v3	1235446	1235859	Troph_H3K4_peak_1942	24	.	1.65544	3.69636	2.48345	PF3D7_1329200		conserved Plasmodium protein, unknown function
Pf3D7_13_v3	1247160	1248112	Troph_H3K4_peak_1943	207	.	2.75421	22.5219	20.7156	intergenic
Pf3D7_13_v3	1257481	1257827	Troph_H3K4_peak_1944	33	.	1.66293	4.61044	3.34961	PF3D7_1329600		conserved Plasmodium protein, unknown function
Pf3D7_13_v3	1260304	1260616	Troph_H3K4_peak_1945	51	.	1.96532	6.54384	5.18514	PF3D7_1329700	ACBP1	apicoplast calcium binding protein 1
Pf3D7_13_v3	1273654	1274022	Troph_H3K4_peak_1946	57	.	2.05399	7.13375	5.74585	PF3D7_1330100		conserved Plasmodium protein, unknown function
Pf3D7_13_v3	1279591	1280137	Troph_H3K4_peak_1947	169	.	2.73013	18.7194	16.943	PF3D7_1330400		ER lumen protein retaining receptor 1, putative
Pf3D7_13_v3	1282143	1283028	Troph_H3K4_peak_1948	44	.	1.92851	5.8208	4.49151	intergenic
Pf3D7_13_v3	1284199	1284642	Troph_H3K4_peak_1949	77	.	2.19525	9.22366	7.75429	PF3D7_1330500		CTLH domain-containing protein, putative
Pf3D7_13_v3	1293722	1294013	Troph_H3K4_peak_1950	90	.	2.3428	10.5297	9.00355	PF3D7_1330800		RNA-binding protein, putative
Pf3D7_13_v3	1301959	1302233	Troph_H3K4_peak_1951	17	.	1.50235	2.90837	1.75626	intergenic
Pf3D7_13_v3	1307713	1308007	Troph_H3K4_peak_1952	21	.	1.5932	3.353	2.16685	PF3D7_1331300	SEC11	signal peptidase complex catalytic subunit SEC11
Pf3D7_13_v3	1319491	1319883	Troph_H3K4_peak_1953	81	.	2.07754	9.63383	8.14761	PF3D7_1331700		glutamine--tRNA ligase, putative
Pf3D7_13_v3	1324502	1324775	Troph_H3K4_peak_1954	23	.	1.64294	3.5946	2.39246	intergenic
Pf3D7_13_v3	1330813	1331065	Troph_H3K4_peak_1955	31	.	1.64442	4.37982	3.12882	intergenic
Pf3D7_13_v3	1331619	1332134	Troph_H3K4_peak_1956	31	.	1.76735	4.38942	3.14061	PF3D7_1332200		conserved protein, unknown function
Pf3D7_13_v3	1356348	1357041	Troph_H3K4_peak_1957	45	.	1.89052	5.87306	4.55582	intergenic
Pf3D7_13_v3	1358802	1359064	Troph_H3K4_peak_1958	17	.	1.55983	2.86611	1.71743	intergenic
Pf3D7_13_v3	1359815	1360611	Troph_H3K4_peak_1959	83	.	2.14772	9.82923	8.34413	PF3D7_1333200	UBA1	ubiquitin-activating enzyme
Pf3D7_13_v3	1390988	1391317	Troph_H3K4_peak_1960	53	.	1.96261	6.754	5.38948	intergenic
Pf3D7_13_v3	1416779	1417352	Troph_H3K4_peak_1961	93	.	2.1701	10.92	9.3873	intergenic
Pf3D7_13_v3	1420439	1421393	Troph_H3K4_peak_1962	251	.	3.26097	27.0479	25.1791	intergenic
Pf3D7_13_v3	1422550	1422895	Troph_H3K4_peak_1963	24	.	1.68981	3.68848	2.47641	intergenic
Pf3D7_13_v3	1427156	1428179	Troph_H3K4_peak_1964	36	.	1.81491	4.87296	3.60243	PF3D7_1335300	RH2b	reticulocyte binding protein 2 homologue b
Pf3D7_13_v3	1467225	1468133	Troph_H3K4_peak_1965	22	.	1.6119	3.49187	2.2954	intergenic
Pf3D7_13_v3	1476702	1476978	Troph_H3K4_peak_1966	30	.	1.66022	4.27248	3.03076	PF3D7_1336300		conserved Plasmodium membrane protein, unknown function	PF3D7_1336400		RanBPM and CLTH-like protein, putative
Pf3D7_13_v3	1481309	1481674	Troph_H3K4_peak_1967	11	.	1.45257	2.22812	1.13938	PF3D7_1336700	PV3	parasitophorous vacuolar protein 3, putative
Pf3D7_13_v3	1485609	1485973	Troph_H3K4_peak_1968	93	.	2.30784	10.9269	9.39545	PF3D7_1336800	NUDC	nuclear movement protein, putative
Pf3D7_13_v3	1523931	1524327	Troph_H3K4_peak_1969	252	.	3.1678	27.1948	25.2186	PF3D7_1337700	PH2	phosphoinositide-binding protein PH2
Pf3D7_13_v3	1525376	1525744	Troph_H3K4_peak_1970	39	.	1.8743	5.26879	3.96781	PF3D7_1337700	PH2	phosphoinositide-binding protein PH2
Pf3D7_13_v3	1540037	1540453	Troph_H3K4_peak_1971	127	.	2.63925	14.3711	12.7216	PF3D7_1338100	RPN3	26S proteasome regulatory subunit RPN3, putative
Pf3D7_13_v3	1549141	1549453	Troph_H3K4_peak_1972	28	.	1.60151	4.03281	2.8031	intergenic
Pf3D7_13_v3	1550918	1551383	Troph_H3K4_peak_1973	100	.	2.29293	11.6286	10.0714	PF3D7_1338400		SprT-like domain-containing protein, putative
Pf3D7_13_v3	1573131	1573582	Troph_H3K4_peak_1974	13	.	1.47058	2.42568	1.3166	PF3D7_1339000		conserved Plasmodium protein, unknown function
Pf3D7_13_v3	1575272	1575609	Troph_H3K4_peak_1975	61	.	1.80343	7.50615	6.10357	intergenic
Pf3D7_13_v3	1576288	1577123	Troph_H3K4_peak_1976	66	.	1.84213	8.02573	6.62508	intergenic
Pf3D7_13_v3	1578778	1579170	Troph_H3K4_peak_1977	31	.	1.78528	4.41651	3.15598	PF3D7_1339300		conserved protein, unknown function
Pf3D7_13_v3	1579798	1580674	Troph_H3K4_peak_1978	61	.	2.11239	7.55456	6.14328	PF3D7_1339300		conserved protein, unknown function
Pf3D7_13_v3	1581603	1582574	Troph_H3K4_peak_1979	26	.	1.70732	3.85729	2.63704	intergenic
Pf3D7_13_v3	1596506	1596789	Troph_H3K4_peak_1980	54	.	2.02127	6.81574	5.4418	PF3D7_1339800	MZT1	mitotic-spindle organizing protein 1, putative
Pf3D7_13_v3	1609644	1610204	Troph_H3K4_peak_1981	56	.	1.91924	7.02617	5.64093	PF3D7_1340400		conserved Plasmodium protein, unknown function
Pf3D7_13_v3	1618624	1619037	Troph_H3K4_peak_1982	63	.	1.92623	7.78561	6.3736	intergenic
Pf3D7_13_v3	1621204	1621823	Troph_H3K4_peak_1983	15	.	1.47857	2.72094	1.58512	PF3D7_1340700	RAB11b	ras-related protein Rab-11B
Pf3D7_13_v3	1624049	1624470	Troph_H3K4_peak_1984	15	.	1.5177	2.7006	1.56611	intergenic
Pf3D7_13_v3	1627198	1627682	Troph_H3K4_peak_1985	59	.	2.00656	7.35728	5.95958	intergenic
Pf3D7_13_v3	1628299	1629303	Troph_H3K4_peak_1986	42	.	1.81213	5.54497	4.22795	intergenic
Pf3D7_13_v3	1631185	1631490	Troph_H3K4_peak_1987	79	.	1.9571	9.47535	7.99176	intergenic
Pf3D7_13_v3	1632469	1634278	Troph_H3K4_peak_1988	100	.	2.29121	11.5796	10.0525	PF3D7_1341200		60S ribosomal protein L18, putative
Pf3D7_13_v3	1638443	1639723	Troph_H3K4_peak_1989	47	.	1.90821	6.05684	4.71536	PF3D7_1341500	ISC1	inner membrane complex suture component, putative
Pf3D7_13_v3	1648135	1648564	Troph_H3K4_peak_1990	130	.	2.66602	14.666	13.0015	PF3D7_1341900		V-type proton ATPase subunit D, putative
Pf3D7_13_v3	1653106	1653708	Troph_H3K4_peak_1991	23	.	1.61612	3.50592	2.30699	PF3D7_1342000		40S ribosomal protein S6
Pf3D7_13_v3	1656305	1656729	Troph_H3K4_peak_1992	24	.	1.65306	3.60233	2.40041	intergenic
Pf3D7_13_v3	1671335	1671612	Troph_H3K4_peak_1993	22	.	1.60894	3.44795	2.25219	intergenic
Pf3D7_13_v3	1674223	1674910	Troph_H3K4_peak_1994	203	.	2.65504	22.2648	20.3764	intergenic
Pf3D7_13_v3	1676265	1676511	Troph_H3K4_peak_1995	21	.	1.59314	3.37052	2.17977	PF3D7_1342700	RPB12	DNA-directed RNA polymerases I, II, and III subunit RPABC4, putative
Pf3D7_13_v3	1677536	1677816	Troph_H3K4_peak_1996	28	.	1.70791	4.107	2.8665	PF3D7_1342700	RPB12	DNA-directed RNA polymerases I, II, and III subunit RPABC4, putative
Pf3D7_13_v3	1682371	1682671	Troph_H3K4_peak_1997	44	.	1.84451	5.73727	4.40997	PF3D7_1342900	AP2-HS	AP2 domain transcription factor AP2-HS
Pf3D7_13_v3	1695160	1696393	Troph_H3K4_peak_1998	246	.	3.19843	26.6055	24.6724	PF3D7_1343000	PMT	phosphoethanolamine N-methyltransferase
[truncated: 445 more rows]

## Sheet: File_4c_ChIPseq_schizont_peak_c
Supplementary File 4c: Peak calling result of PfMORC ChIP-seq in schizont stage.
chrom	start	end	name	score	strand	signalValue	pValue	qValue	annotation 1	gene name 1	gene description 1	annotation 2	gene name 2	gene description 2
Pf3D7_01_v3	5721	6155	Szt_H3K4_peak_1	487	.	3.83915	51.151	48.7343	intergenic
Pf3D7_01_v3	8399	9932	Szt_H3K4_peak_2	243	.	2.87756	26.4724	24.3845	intergenic
Pf3D7_01_v3	26847	27790	Szt_H3K4_peak_3	795	.	4.50194	82.1922	79.5867	intergenic
Pf3D7_01_v3	28229	28656	Szt_H3K4_peak_4	460	.	3.75453	48.4581	46.063	intergenic
Pf3D7_01_v3	29297	33351	Szt_H3K4_peak_5	125	.	2.11256	14.3691	12.5901	intergenic
Pf3D7_01_v3	34381	34741	Szt_H3K4_peak_6	20	.	1.45273	3.29009	2.01592	intergenic
Pf3D7_01_v3	45703	46760	Szt_H3K4_peak_7	36	.	1.5935	5.02337	3.61903	intergenic
Pf3D7_01_v3	47397	48353	Szt_H3K4_peak_8	59	.	1.81358	7.50125	5.93899	intergenic
Pf3D7_01_v3	50910	51533	Szt_H3K4_peak_9	32	.	1.63749	4.66844	3.27921	PF3D7_0100400	RIF	rifin
Pf3D7_01_v3	59096	59507	Szt_H3K4_peak_10	81	.	1.99434	9.79758	8.13301	PF3D7_0100800	RIF	rifin
Pf3D7_01_v3	60312	63183	Szt_H3K4_peak_11	38	.	1.63376	5.26755	3.83926	PF3D7_0100900	RIF	rifin
Pf3D7_01_v3	63793	66435	Szt_H3K4_peak_12	35	.	1.62021	4.91352	3.52018	PF3D7_0101000	RIF	rifin
Pf3D7_01_v3	81862	82605	Szt_H3K4_peak_13	48	.	1.71446	6.36697	4.86235	PF3D7_0101600	RIF	rifin
Pf3D7_01_v3	87323	87577	Szt_H3K4_peak_14	33	.	1.62316	4.7362	3.3363	PF3D7_0101800		stevor
Pf3D7_01_v3	90360	91963	Szt_H3K4_peak_15	31	.	1.59473	4.56443	3.19	PF3D7_0101900	RIF	rifin
Pf3D7_01_v3	92881	93795	Szt_H3K4_peak_16	37	.	1.60275	5.12951	3.70533	intergenic
Pf3D7_01_v3	97215	98241	Szt_H3K4_peak_17	49	.	1.79242	6.4153	4.91636	PF3D7_0102200	RESA	ring-infected erythrocyte surface antigen
Pf3D7_01_v3	116982	118138	Szt_H3K4_peak_18	69	.	1.86518	8.53121	6.94555	intergenic
Pf3D7_01_v3	186357	186741	Szt_H3K4_peak_19	64	.	1.92577	8.02896	6.4286	intergenic
Pf3D7_01_v3	187467	188037	Szt_H3K4_peak_20	32	.	1.64152	4.59765	3.21542	PF3D7_0104300	UBP1	ubiquitin carboxyl-terminal hydrolase 1, putative
Pf3D7_01_v3	226532	227761	Szt_H3K4_peak_21	104	.	2.0438	12.2023	10.452	intergenic
Pf3D7_01_v3	231615	231963	Szt_H3K4_peak_22	69	.	1.76101	8.57898	6.97039	intergenic
Pf3D7_01_v3	236075	236789	Szt_H3K4_peak_23	12	.	1.39958	2.44789	1.25571	PF3D7_0105700		asparagine-rich antigen Pfa35-2
Pf3D7_01_v3	259273	259795	Szt_H3K4_peak_24	105	.	2.14902	12.3321	10.595	PF3D7_0106100		V-type proton ATPase subunit C, putative
Pf3D7_01_v3	278594	279265	Szt_H3K4_peak_25	21	.	1.51258	3.47285	2.17806	PF3D7_0106600		conserved Plasmodium protein, unknown function
Pf3D7_01_v3	301381	302075	Szt_H3K4_peak_26	18	.	1.48483	3.06288	1.80461	PF3D7_0107400	ATPk	ATP synthase-associated protein, putative
Pf3D7_01_v3	312276	312937	Szt_H3K4_peak_27	191	.	2.59086	21.0681	19.1036	intergenic
Pf3D7_01_v3	344377	344672	Szt_H3K4_peak_28	51	.	1.79939	6.71655	5.1974	PF3D7_0108400		mitochondrial carrier protein, putative
Pf3D7_01_v3	347215	348293	Szt_H3K4_peak_29	28	.	1.60164	4.1878	2.83804	PF3D7_0108500		ELM2 domain-containing protein, putative
Pf3D7_01_v3	359992	360294	Szt_H3K4_peak_30	18	.	1.46364	3.0742	1.81585	intergenic
Pf3D7_01_v3	361480	361776	Szt_H3K4_peak_31	25	.	1.55897	3.93063	2.59672	PF3D7_0109000	PHIL1	photosensitized INA-labeled protein PHIL1
Pf3D7_01_v3	362310	363730	Szt_H3K4_peak_32	189	.	2.51885	20.8426	18.9793	PF3D7_0109000	PHIL1	photosensitized INA-labeled protein PHIL1
Pf3D7_01_v3	402923	403253	Szt_H3K4_peak_33	12	.	1.40115	2.44187	1.24942	intergenic
Pf3D7_01_v3	416440	416807	Szt_H3K4_peak_34	17	.	1.48043	3.01077	1.75721	PF3D7_0110800		transcription initiation factor TFIIB, putative
Pf3D7_01_v3	441158	443078	Szt_H3K4_peak_35	33	.	1.63006	4.73221	3.34904	PF3D7_0111600		conserved Plasmodium protein, unknown function
Pf3D7_01_v3	451660	451954	Szt_H3K4_peak_36	13	.	1.37118	2.58695	1.37848	PF3D7_0112000	TatD	TatD-like deoxyribonuclease
Pf3D7_01_v3	453723	454189	Szt_H3K4_peak_37	142	.	2.18967	16.107	14.2413	PF3D7_0112100	PIMMS1	PIMMS1 protein
Pf3D7_01_v3	454894	456701	Szt_H3K4_peak_38	23	.	1.53521	3.68934	2.38115	PF3D7_0112100	PIMMS1	PIMMS1 protein
Pf3D7_01_v3	463182	463696	Szt_H3K4_peak_39	13	.	1.40869	2.51123	1.31156	PF3D7_0112200	MRP1	multidrug resistance-associated protein 1
Pf3D7_01_v3	485495	485822	Szt_H3K4_peak_40	24	.	1.57148	3.81469	2.48759	intergenic
Pf3D7_01_v3	514138	514663	Szt_H3K4_peak_41	429	.	3.10193	45.2345	42.9074	intergenic
Pf3D7_01_v3	522856	533162	Szt_H3K4_peak_42	74	.	1.84448	9.0065	7.41989	intergenic
Pf3D7_01_v3	533976	535562	Szt_H3K4_peak_43	25	.	1.52507	3.86002	2.53839	intergenic
Pf3D7_01_v3	541880	542323	Szt_H3K4_peak_44	170	.	2.5412	19.0285	17.0783	PF3D7_0114000	EPF1	exported protein family 1
Pf3D7_01_v3	545784	546093	Szt_H3K4_peak_45	19	.	1.49807	3.23661	1.96112	intergenic
Pf3D7_01_v3	550561	550866	Szt_H3K4_peak_46	65	.	1.93241	8.18952	6.58613	PF3D7_0114200	EPF3	exported protein family 3
Pf3D7_01_v3	551333	555975	Szt_H3K4_peak_47	52	.	1.7559	6.73551	5.23337	intergenic
Pf3D7_01_v3	556614	558403	Szt_H3K4_peak_48	21	.	1.53586	3.49307	2.19616	PF3D7_0114500		Plasmodium exported protein (hyp10), unknown function
Pf3D7_01_v3	559132	559522	Szt_H3K4_peak_49	35	.	1.67518	4.9205	3.50948	intergenic
Pf3D7_01_v3	559990	561348	Szt_H3K4_peak_50	19	.	1.43088	3.17891	1.91299	intergenic
Pf3D7_01_v3	561886	562362	Szt_H3K4_peak_51	47	.	1.76941	6.20833	4.71121	intergenic
Pf3D7_01_v3	563854	565375	Szt_H3K4_peak_52	40	.	1.65453	5.46897	4.04224	PF3D7_0114700	RIF	rifin
Pf3D7_01_v3	566270	567820	Szt_H3K4_peak_53	49	.	1.69746	6.44457	4.95397	PF3D7_0114750		Plasmodium exported protein, unknown function, fragment
Pf3D7_01_v3	568727	570638	Szt_H3K4_peak_54	43	.	1.73813	5.79832	4.34267	PF3D7_0114800		Plasmodium exported protein (hyp7), unknown function
Pf3D7_01_v3	572132	572868	Szt_H3K4_peak_55	15	.	1.45065	2.72702	1.50088	intergenic
Pf3D7_01_v3	592330	593074	Szt_H3K4_peak_56	55	.	1.74111	7.13626	5.58092	PF3D7_0115200	RIF	rifin
Pf3D7_01_v3	593686	594812	Szt_H3K4_peak_57	22	.	1.49905	3.58642	2.28172	PF3D7_0115300	RIF	rifin
Pf3D7_01_v3	595580	596204	Szt_H3K4_peak_58	158	.	2.3924	17.7709	15.8162	PF3D7_0115300	RIF	rifin
Pf3D7_01_v3	596824	597604	Szt_H3K4_peak_59	26	.	1.56533	3.96915	2.63465	intergenic
Pf3D7_01_v3	598985	599435	Szt_H3K4_peak_60	66	.	1.83091	8.26415	6.64633	PF3D7_0115400		stevor
Pf3D7_01_v3	599918	600691	Szt_H3K4_peak_61	29	.	1.62066	4.35095	2.985	intergenic
Pf3D7_01_v3	610518	615138	Szt_H3K4_peak_62	152	.	2.15808	17.0048	15.235	intergenic
Pf3D7_01_v3	615679	617873	Szt_H3K4_peak_63	1076	.	5.2773	110.686	107.696	intergenic
Pf3D7_01_v3	640096	640387	Szt_H3K4_peak_64	24	.	1.5484	3.80097	2.47612	intergenic
Pf3D7_02_v3	123610	124076	Szt_H3K4_peak_65	16	.	1.44521	2.87363	1.63523	intergenic
Pf3D7_02_v3	126337	127545	Szt_H3K4_peak_66	74	.	1.97815	9.07143	7.44522	PF3D7_0202500	ETRAMP2	early transcribed membrane protein 2
Pf3D7_02_v3	157454	157718	Szt_H3K4_peak_67	45	.	1.75357	6.01344	4.5333	PF3D7_0203200		conserved Plasmodium protein, unknown function
Pf3D7_02_v3	164134	164505	Szt_H3K4_peak_68	105	.	2.18037	12.3133	10.5615	intergenic
Pf3D7_02_v3	190443	190692	Szt_H3K4_peak_69	43	.	1.75019	5.78367	4.31277	intergenic
Pf3D7_02_v3	218198	218561	Szt_H3K4_peak_70	15	.	1.44757	2.81853	1.58724	PF3D7_0205200		MORN repeat protein, putative
Pf3D7_02_v3	246538	248018	Szt_H3K4_peak_71	54	.	1.80544	7.00885	5.48101	intergenic
Pf3D7_02_v3	251263	251848	Szt_H3K4_peak_72	35	.	1.66294	4.99573	3.59723	intergenic
Pf3D7_02_v3	268836	269118	Szt_H3K4_peak_73	25	.	1.5718	3.86818	2.54108	PF3D7_0206600		DNA-directed RNA polymerase III subunit RPC10, putative
Pf3D7_02_v3	271106	271835	Szt_H3K4_peak_74	22	.	1.48538	3.60007	2.29734	PF3D7_0206700	ADSL	adenylosuccinate lyase	PF3D7_0206800	MSP2	merozoite surface protein 2
Pf3D7_02_v3	273886	277030	Szt_H3K4_peak_75	144	.	2.20029	16.1876	14.4146	PF3D7_0206900	MSP5	merozoite surface protein 5
Pf3D7_02_v3	278867	279912	Szt_H3K4_peak_76	39	.	1.65359	5.33887	3.90648	intergenic
Pf3D7_02_v3	287888	288679	Szt_H3K4_peak_77	255	.	2.6819	27.6418	25.5033	PF3D7_0207200	ISCA1	iron-sulfur assembly protein, putative
Pf3D7_02_v3	293374	294468	Szt_H3K4_peak_78	17	.	1.4391	2.9732	1.7257	PF3D7_0207400	SERA7	serine repeat antigen 7
Pf3D7_02_v3	307488	308133	Szt_H3K4_peak_79	37	.	1.66167	5.17327	3.74796	PF3D7_0207700	SERA4	serine repeat antigen 4
Pf3D7_02_v3	312689	312931	Szt_H3K4_peak_80	36	.	1.6541	5.0582	3.64147	PF3D7_0207800	SERA3	serine repeat antigen 3
Pf3D7_02_v3	321722	322047	Szt_H3K4_peak_81	74	.	1.99163	9.05817	7.40632	PF3D7_0208000	SERA1	serine repeat antigen 1
Pf3D7_02_v3	351450	352001	Szt_H3K4_peak_82	23	.	1.54054	3.63399	2.3279	PF3D7_0208500	ACP	acyl carrier protein
Pf3D7_02_v3	356119	357889	Szt_H3K4_peak_83	145	.	2.28163	16.322	14.5476	PF3D7_0208700		SHS2 domain-containing protein, putative
Pf3D7_02_v3	384824	385117	Szt_H3K4_peak_84	47	.	1.72193	6.27051	4.77355	PF3D7_0209200	MTR3	exosome complex component MTR3, putative
Pf3D7_02_v3	399344	399671	Szt_H3K4_peak_85	22	.	1.50864	3.53728	2.2367	PF3D7_0209700		RING zinc finger protein, putative
Pf3D7_02_v3	402495	403333	Szt_H3K4_peak_86	32	.	1.6267	4.63903	3.25198	PF3D7_0209800	UAP56	ATP-dependent RNA helicase UAP56
Pf3D7_02_v3	431186	431463	Szt_H3K4_peak_87	11	.	1.36194	2.33273	1.15336	PF3D7_0210600	CERLI1	protein CERLI1
Pf3D7_02_v3	434752	434996	Szt_H3K4_peak_88	56	.	1.86013	7.22847	5.67801	intergenic
Pf3D7_02_v3	440228	440568	Szt_H3K4_peak_89	25	.	1.58059	3.91349	2.57937	PF3D7_0210900		conserved Plasmodium protein, unknown function
Pf3D7_02_v3	445161	445675	Szt_H3K4_peak_90	19	.	1.47353	3.27421	1.99886	intergenic
Pf3D7_02_v3	451476	451728	Szt_H3K4_peak_91	12	.	1.41209	2.43991	1.24588	PF3D7_0211100		conserved Plasmodium protein, unknown function
Pf3D7_02_v3	512809	513203	Szt_H3K4_peak_92	92	.	1.9597	10.9828	9.26606	intergenic
Pf3D7_02_v3	521923	522637	Szt_H3K4_peak_93	161	.	2.44513	18.0755	16.1368	PF3D7_0212600	SPATR	secreted protein with altered thrombospondin repeat domain
Pf3D7_02_v3	528894	529538	Szt_H3K4_peak_94	398	.	2.82981	42.2141	39.8775	intergenic
Pf3D7_02_v3	532245	532566	Szt_H3K4_peak_95	25	.	1.55106	3.89584	2.56563	PF3D7_0212900	ATEL1	arginyl-tRNA--protein transferase
Pf3D7_02_v3	578228	578840	Szt_H3K4_peak_96	67	.	1.90945	8.30312	6.72897	intergenic
Pf3D7_02_v3	591917	592439	Szt_H3K4_peak_97	18	.	1.46207	3.14793	1.88679	intergenic
Pf3D7_02_v3	601888	603144	Szt_H3K4_peak_98	140	.	2.283	15.8838	14.0825	PF3D7_0214800		conserved Plasmodium membrane protein, unknown function
Pf3D7_02_v3	609950	610323	Szt_H3K4_peak_99	58	.	1.84111	7.3821	5.83025	PF3D7_0214900	RON6	rhoptry neck protein 6
Pf3D7_02_v3	615230	615507	Szt_H3K4_peak_100	30	.	1.56879	4.38012	3.0134	PF3D7_0215000	ACS9	acyl-CoA synthetase
Pf3D7_02_v3	620561	620951	Szt_H3K4_peak_101	17	.	1.48325	2.99832	1.74538	intergenic
Pf3D7_02_v3	632767	633506	Szt_H3K4_peak_102	350	.	3.15897	37.1442	35.0251	intergenic
Pf3D7_02_v3	638705	638954	Szt_H3K4_peak_103	18	.	1.46794	3.1108	1.85082	intergenic
Pf3D7_02_v3	684591	684870	Szt_H3K4_peak_104	33	.	1.58461	4.73097	3.33935	PF3D7_0216600		sugar transporter, putative
Pf3D7_02_v3	685500	685842	Szt_H3K4_peak_105	35	.	1.64436	4.99274	3.5895	PF3D7_0216600		sugar transporter, putative
Pf3D7_02_v3	689325	690356	Szt_H3K4_peak_106	52	.	1.821	6.7972	5.27835	PF3D7_0216700	ATG11	autophagy-related protein 11, putative
Pf3D7_02_v3	700146	700486	Szt_H3K4_peak_107	30	.	1.62103	4.47337	3.09979	PF3D7_0216900		conserved Plasmodium protein, unknown function
Pf3D7_02_v3	703569	703838	Szt_H3K4_peak_108	12	.	1.40297	2.39343	1.2055	PF3D7_0217000		conserved Plasmodium membrane protein, unknown function
Pf3D7_02_v3	717996	720152	Szt_H3K4_peak_109	47	.	1.75199	6.26221	4.78867	PF3D7_0217500	CDPK1	calcium-dependent protein kinase 1
Pf3D7_02_v3	723028	723327	Szt_H3K4_peak_110	32	.	1.64127	4.59026	3.20519	PF3D7_0217600		conserved Plasmodium protein, unknown function
Pf3D7_02_v3	737788	738198	Szt_H3K4_peak_111	40	.	1.70636	5.44697	4.0056	PF3D7_0218000	RFC2	replication factor C subunit 2, putative
Pf3D7_02_v3	748243	748663	Szt_H3K4_peak_112	129	.	2.2731	14.7523	12.9149	intergenic
Pf3D7_02_v3	789595	790005	Szt_H3K4_peak_113	54	.	1.79509	6.94262	5.41196	PF3D7_0219900		Plasmodium exported protein, unknown function
Pf3D7_02_v3	794249	794983	Szt_H3K4_peak_114	106	.	2.20197	12.4457	10.6736	PF3D7_0220000	LSA3	liver stage antigen 3
Pf3D7_02_v3	808061	808538	Szt_H3K4_peak_115	22	.	1.53978	3.59163	2.28791	PF3D7_0220200		Plasmodium exported protein, unknown function
Pf3D7_02_v3	809547	810060	Szt_H3K4_peak_116	21	.	1.46893	3.43808	2.14534	PF3D7_0220200		Plasmodium exported protein, unknown function
Pf3D7_02_v3	815063	816409	Szt_H3K4_peak_117	283	.	2.85765	30.3415	28.3897	intergenic
Pf3D7_02_v3	817068	817696	Szt_H3K4_peak_118	14	.	1.42639	2.71782	1.49559	intergenic
Pf3D7_02_v3	832769	833161	Szt_H3K4_peak_119	22	.	1.54143	3.5564	2.2535	PF3D7_0220700		Plasmodium exported protein (hyp9), unknown function
Pf3D7_02_v3	837763	839011	Szt_H3K4_peak_120	244	.	2.7777	26.5895	24.4832	PF3D7_0220800	CLAG2	cytoadherence linked asexual protein 2
Pf3D7_02_v3	843195	843502	Szt_H3K4_peak_121	11	.	1.32378	2.30553	1.12885	intergenic
Pf3D7_02_v3	845559	846748	Szt_H3K4_peak_122	33	.	1.60936	4.76794	3.37453	intergenic
Pf3D7_02_v3	847353	850415	Szt_H3K4_peak_123	55	.	1.7538	7.04686	5.52968	PF3D7_0221000		Plasmodium exported protein, unknown function
Pf3D7_02_v3	850924	851198	Szt_H3K4_peak_124	16	.	1.45312	2.91145	1.6702	intergenic
Pf3D7_02_v3	856881	857162	Szt_H3K4_peak_125	16	.	1.43826	2.86432	1.62783	intergenic
Pf3D7_02_v3	857921	858607	Szt_H3K4_peak_126	14	.	1.40469	2.64201	1.42743	intergenic
Pf3D7_02_v3	859083	859595	Szt_H3K4_peak_127	17	.	1.42628	2.95889	1.71184	intergenic
Pf3D7_02_v3	861113	863738	Szt_H3K4_peak_128	55	.	1.73813	7.00121	5.53309	intergenic
Pf3D7_02_v3	865028	865434	Szt_H3K4_peak_129	34	.	1.66052	4.80661	3.40306	intergenic
Pf3D7_02_v3	866709	867037	Szt_H3K4_peak_130	15	.	1.45886	2.80517	1.57297	intergenic
Pf3D7_02_v3	873009	873371	Szt_H3K4_peak_131	11	.	1.3565	2.2807	1.10724	intergenic
Pf3D7_02_v3	873845	874221	Szt_H3K4_peak_132	34	.	1.65674	4.89612	3.48478	intergenic
Pf3D7_02_v3	890163	890714	Szt_H3K4_peak_133	79	.	1.92158	9.60302	7.93882	PF3D7_0222500	RIF	rifin
Pf3D7_02_v3	892707	894148	Szt_H3K4_peak_134	43	.	1.6672	5.77361	4.30613	PF3D7_0222600	RIF	rifin
Pf3D7_02_v3	896712	897327	Szt_H3K4_peak_135	23	.	1.53677	3.71035	2.39266	PF3D7_0222700	RIF	rifin
Pf3D7_02_v3	899952	900388	Szt_H3K4_peak_136	82	.	1.95751	9.92175	8.21763	PF3D7_0222800		stevor
Pf3D7_02_v3	905153	905740	Szt_H3K4_peak_137	50	.	1.74284	6.5527	5.03829	PF3D7_0223100	RIF	rifin
Pf3D7_02_v3	908230	908747	Szt_H3K4_peak_138	69	.	1.88849	8.55599	6.94102	PF3D7_0223200	RIF	rifin	PF3D7_0223300		erythrocyte membrane protein 1 (PfEMP1), exon 2
Pf3D7_02_v3	909853	910160	Szt_H3K4_peak_139	35	.	1.67059	4.99178	3.5882	PF3D7_0223300		erythrocyte membrane protein 1 (PfEMP1), exon 2
Pf3D7_02_v3	914026	914399	Szt_H3K4_peak_140	42	.	1.7187	5.70433	4.23307	PF3D7_0223400	RIF	rifin
Pf3D7_02_v3	918306	923874	Szt_H3K4_peak_141	141	.	2.13995	15.8741	14.1418	intergenic
Pf3D7_02_v3	924608	926490	Szt_H3K4_peak_142	452	.	3.57579	47.4945	45.2186	intergenic
Pf3D7_02_v3	929246	929533	Szt_H3K4_peak_143	19	.	1.49464	3.17202	1.90236	intergenic
Pf3D7_02_v3	935824	938061	Szt_H3K4_peak_144	440	.	3.3096	46.362	44.0718	intergenic
Pf3D7_02_v3	938497	938891	Szt_H3K4_peak_145	39	.	1.70794	5.35483	3.92059	intergenic
Pf3D7_03_v3	7755	8754	Szt_H3K4_peak_146	172	.	2.56282	19.1718	17.2149	intergenic
Pf3D7_03_v3	11300	12581	Szt_H3K4_peak_147	392	.	3.34079	41.4471	39.2402	intergenic
Pf3D7_03_v3	13680	14015	Szt_H3K4_peak_148	45	.	1.77305	6.01181	4.52375	intergenic
Pf3D7_03_v3	34247	36129	Szt_H3K4_peak_149	835	.	4.75778	86.2731	83.529	intergenic
Pf3D7_03_v3	36758	41075	Szt_H3K4_peak_150	144	.	2.123	16.1161	14.4046	intergenic
Pf3D7_03_v3	52327	52686	Szt_H3K4_peak_151	67	.	1.86902	8.32919	6.70635	PF3D7_0300400		stevor
Pf3D7_03_v3	61395	62674	Szt_H3K4_peak_152	22	.	1.51136	3.56778	2.26534	PF3D7_0300700	RIF	rifin
Pf3D7_03_v3	65408	66345	Szt_H3K4_peak_153	17	.	1.48394	3.0411	1.78686	intergenic
Pf3D7_03_v3	66892	69695	Szt_H3K4_peak_154	38	.	1.67852	5.25534	3.82563	PF3D7_0300900		stevor
Pf3D7_03_v3	70132	70469	Szt_H3K4_peak_155	14	.	1.35672	2.65839	1.44299	PF3D7_0301000	ACS2	acyl-CoA synthetase
Pf3D7_03_v3	71046	74213	Szt_H3K4_peak_156	32	.	1.60213	4.60639	3.23053	intergenic
Pf3D7_03_v3	74621	75238	Szt_H3K4_peak_157	22	.	1.50243	3.5613	2.26409	intergenic
Pf3D7_03_v3	75711	77779	Szt_H3K4_peak_158	41	.	1.67248	5.53553	4.10046	PF3D7_0301100		Plasmodium exported protein (hyp13), unknown function
Pf3D7_03_v3	101339	102568	Szt_H3K4_peak_159	554	.	3.6603	57.7562	55.4322	intergenic
Pf3D7_03_v3	115235	115653	Szt_H3K4_peak_160	84	.	1.92687	10.0881	8.40863	intergenic
Pf3D7_03_v3	116510	119673	Szt_H3K4_peak_161	195	.	2.26867	21.4216	19.585	intergenic
Pf3D7_03_v3	120961	121350	Szt_H3K4_peak_162	80	.	2.02693	9.72736	8.04725	intergenic
Pf3D7_03_v3	124652	126083	Szt_H3K4_peak_163	45	.	1.71555	5.98308	4.50605	intergenic
Pf3D7_03_v3	126494	135468	Szt_H3K4_peak_164	141	.	2.20762	15.9009	14.1318	intergenic
Pf3D7_03_v3	150849	151516	Szt_H3K4_peak_165	29	.	1.58274	4.34768	2.98317	PF3D7_0302900		exportin-1, putative
Pf3D7_03_v3	202035	203804	Szt_H3K4_peak_166	264	.	2.91489	28.6103	26.4638	PF3D7_0304100	IMC1e	inner membrane complex protein 1e, putative
Pf3D7_03_v3	222865	223337	Szt_H3K4_peak_167	79	.	2.00105	9.58132	7.91483	intergenic
Pf3D7_03_v3	249247	250397	Szt_H3K4_peak_168	100	.	2.03551	11.7142	10.0305	PF3D7_0305200		GRIP domain-containing protein, putative
Pf3D7_03_v3	286609	287220	Szt_H3K4_peak_169	17	.	1.42345	3.00764	1.75776	PF3D7_0306000	QCR8	cytochrome b-c1 complex subunit 8, putative
Pf3D7_03_v3	309140	309394	Szt_H3K4_peak_170	42	.	1.70741	5.73184	4.26641	PF3D7_0306900		40S ribosomal protein S23, putative
Pf3D7_03_v3	339194	339494	Szt_H3K4_peak_171	84	.	1.92188	10.1644	8.46227	PF3D7_0307900		conserved Plasmodium protein, unknown function
Pf3D7_03_v3	355465	355905	Szt_H3K4_peak_172	127	.	2.20258	14.5913	12.7894	PF3D7_0308100		zinc finger protein, putative
Pf3D7_03_v3	366555	369998	Szt_H3K4_peak_173	83	.	1.94472	9.9257	8.31025	intergenic
Pf3D7_03_v3	374679	375702	Szt_H3K4_peak_174	32	.	1.58858	4.5859	3.2146	PF3D7_0308700		conserved protein, unknown function
Pf3D7_03_v3	396441	396997	Szt_H3K4_peak_175	99	.	2.14212	11.6902	9.9435	PF3D7_0309300		N2227-like protein, putative
Pf3D7_03_v3	406544	406825	Szt_H3K4_peak_176	51	.	1.81919	6.64538	5.12415	PF3D7_0309600	PfP2	60S acidic ribosomal protein P2
Pf3D7_03_v3	410741	411744	Szt_H3K4_peak_177	41	.	1.71542	5.58101	4.14471	PF3D7_0309800	YTH2	YTH domain-containing protein 2
Pf3D7_03_v3	434429	435467	Szt_H3K4_peak_178	53	.	1.75388	6.84285	5.33575	intergenic
Pf3D7_03_v3	451809	452063	Szt_H3K4_peak_179	33	.	1.56072	4.76597	3.37101	PF3D7_0310500	DHX57	ATP-dependent RNA helicase DHX57, putative
Pf3D7_03_v3	486489	487629	Szt_H3K4_peak_180	40	.	1.7189	5.51054	4.06684	PF3D7_0311400	PKRP	kinase-related protein PKRP, putative
Pf3D7_03_v3	488492	488847	Szt_H3K4_peak_181	25	.	1.55218	3.86329	2.53413	PF3D7_0311400	PKRP	kinase-related protein PKRP, putative
Pf3D7_03_v3	519120	519485	Szt_H3K4_peak_182	91	.	1.85448	10.9088	9.19622	intergenic
Pf3D7_03_v3	527507	527999	Szt_H3K4_peak_183	30	.	1.62395	4.38753	3.01891	PF3D7_0312500	MFR3	multidrug-resistant modulator MFR3
Pf3D7_03_v3	531124	532137	Szt_H3K4_peak_184	63	.	1.82163	7.93818	6.35597	intergenic
Pf3D7_03_v3	570491	570796	Szt_H3K4_peak_185	24	.	1.54449	3.79788	2.47349	intergenic
Pf3D7_03_v3	587718	588075	Szt_H3K4_peak_186	66	.	1.89813	8.20889	6.60922	PF3D7_0314700	RNF1	RING finger protein RNF1
Pf3D7_03_v3	593628	594586	Szt_H3K4_peak_187	53	.	1.82269	6.8958	5.37747	intergenic
Pf3D7_03_v3	595396	595923	Szt_H3K4_peak_188	12	.	1.41594	2.45896	1.26309	intergenic
Pf3D7_03_v3	602426	602953	Szt_H3K4_peak_189	17	.	1.43938	2.95759	1.71145	intergenic
Pf3D7_03_v3	603784	604978	Szt_H3K4_peak_190	190	.	2.45944	20.8542	19.0346	PF3D7_0314800		conserved Plasmodium protein, unknown function
Pf3D7_03_v3	614395	615255	Szt_H3K4_peak_191	55	.	1.80452	7.05967	5.52048	intergenic
Pf3D7_03_v3	684959	685238	Szt_H3K4_peak_192	17	.	1.44909	2.98032	1.7326	intergenic
Pf3D7_03_v3	685732	686008	Szt_H3K4_peak_193	40	.	1.66836	5.55	4.09729	PF3D7_0317100	B9	6-cysteine protein
Pf3D7_03_v3	696831	697093	Szt_H3K4_peak_194	49	.	1.76921	6.41796	4.91082	intergenic
Pf3D7_03_v3	697649	698918	Szt_H3K4_peak_195	72	.	1.8474	8.77082	7.20909	PF3D7_0317300		conserved Plasmodium protein, unknown function
Pf3D7_03_v3	716497	716898	Szt_H3K4_peak_196	18	.	1.4398	3.12973	1.86612	PF3D7_0317500	EG5	kinesin-5
Pf3D7_03_v3	723450	723698	Szt_H3K4_peak_197	36	.	1.68285	5.0564	3.64139	PF3D7_0317600	RPS11	40S ribosomal protein S11, putative
Pf3D7_03_v3	745853	746110	Szt_H3K4_peak_198	29	.	1.58916	4.31293	2.94831	intergenic
Pf3D7_03_v3	766852	767126	Szt_H3K4_peak_199	18	.	1.4664	3.13474	1.87018	PF3D7_0318500		conserved Plasmodium protein, unknown function
Pf3D7_03_v3	789232	789877	Szt_H3K4_peak_200	13	.	1.4124	2.50206	1.30271	PF3D7_0318800		triosephosphate isomerase, putative
Pf3D7_03_v3	819732	820079	Szt_H3K4_peak_201	108	.	2.16494	12.5977	10.8198	PF3D7_0319700	ABCI3	ABC transporter I family member 1, putative
Pf3D7_03_v3	832883	833153	Szt_H3K4_peak_202	41	.	1.71038	5.62321	4.16367	PF3D7_0319900		conserved protein, unknown function
Pf3D7_03_v3	859663	860239	Szt_H3K4_peak_203	29	.	1.61974	4.29556	2.92904	PF3D7_0320500	Nico	nicotinamidase, putative
Pf3D7_03_v3	860945	862796	Szt_H3K4_peak_204	21	.	1.47426	3.42855	2.14194	PF3D7_0320600		conserved protein, unknown function
Pf3D7_03_v3	868128	868688	Szt_H3K4_peak_205	72	.	1.87144	8.89581	7.27148	PF3D7_0320800	DOZI	ATP-dependent RNA helicase DDX6
Pf3D7_03_v3	872632	874613	Szt_H3K4_peak_206	133	.	2.17211	15.1199	13.3755	PF3D7_0320900	H2A.Z	histone H2A.Z
Pf3D7_03_v3	886069	886477	Szt_H3K4_peak_207	53	.	1.82193	6.88293	5.34938	PF3D7_0321200	ALG7	UDP-N-acetylglucosamine--dolichyl-phosphate N-acetylglucosaminephosphotransferase, putative
Pf3D7_03_v3	893552	894017	Szt_H3K4_peak_208	59	.	1.853	7.50779	5.94396	PF3D7_0321400	pPK1	pseudo protein kinase 1, putative
Pf3D7_03_v3	984829	985079	Szt_H3K4_peak_209	19	.	1.47191	3.26167	1.98454	PF3D7_0323500	SMN	survival motor neuron-like protein
Pf3D7_03_v3	994880	995184	Szt_H3K4_peak_210	21	.	1.49379	3.4216	2.13207	PF3D7_0323800		conserved Plasmodium protein, unknown function
Pf3D7_03_v3	1015974	1017755	Szt_H3K4_peak_211	61	.	1.8372	7.74744	6.16819	intergenic
Pf3D7_03_v3	1019279	1020161	Szt_H3K4_peak_212	32	.	1.56938	4.63254	3.25015	PF3D7_0324500	RIF	rifin
Pf3D7_03_v3	1022636	1022990	Szt_H3K4_peak_213	51	.	1.77791	6.63849	5.11075	PF3D7_0324600		stevor
Pf3D7_03_v3	1035216	1038527	Szt_H3K4_peak_214	178	.	2.33324	19.7289	17.8163	intergenic
Pf3D7_03_v3	1039146	1039466	Szt_H3K4_peak_215	378	.	3.47655	40.1617	37.843	intergenic
Pf3D7_03_v3	1040037	1041495	Szt_H3K4_peak_216	1067	.	4.56373	109.699	106.791	intergenic
Pf3D7_03_v3	1042897	1043428	Szt_H3K4_peak_217	26	.	1.58178	3.9601	2.62255	intergenic
Pf3D7_03_v3	1050334	1051568	Szt_H3K4_peak_218	66	.	1.85905	8.2041	6.64156	intergenic
Pf3D7_03_v3	1052093	1054518	Szt_H3K4_peak_219	159	.	2.33011	17.8705	15.9856	intergenic
Pf3D7_04_v3	5380	5705	Szt_H3K4_peak_220	307	.	3.19109	32.9487	30.7275	intergenic
Pf3D7_04_v3	8162	8418	Szt_H3K4_peak_221	78	.	2.03931	9.55098	7.86745	intergenic
Pf3D7_04_v3	9006	9805	Szt_H3K4_peak_222	70	.	1.92537	8.65212	7.05762	intergenic
Pf3D7_04_v3	25923	26635	Szt_H3K4_peak_223	1102	.	5.5662	113.253	110.291	intergenic
Pf3D7_04_v3	28475	33575	Szt_H3K4_peak_224	121	.	2.04556	13.838	12.1447	intergenic
Pf3D7_04_v3	47592	49529	Szt_H3K4_peak_225	20	.	1.46516	3.30445	2.02509	intergenic
Pf3D7_04_v3	50164	55504	Szt_H3K4_peak_226	37	.	1.62018	5.213	3.79633	intergenic
Pf3D7_04_v3	55978	57192	Szt_H3K4_peak_227	45	.	1.69145	5.97101	4.50215	intergenic
Pf3D7_04_v3	60196	60826	Szt_H3K4_peak_228	47	.	1.7131	6.19096	4.7031	PF3D7_0400500	RIF	rifin
Pf3D7_04_v3	63149	63996	Szt_H3K4_peak_229	49	.	1.71773	6.45369	4.96044	PF3D7_0400700	RIF	rifin
Pf3D7_04_v3	66583	66943	Szt_H3K4_peak_230	37	.	1.64509	5.22625	3.79876	PF3D7_0400800		stevor
Pf3D7_04_v3	69985	70854	Szt_H3K4_peak_231	39	.	1.62017	5.42224	3.98207	PF3D7_0400900	RIF	rifin
Pf3D7_04_v3	73404	73806	Szt_H3K4_peak_232	41	.	1.66674	5.55867	4.10575	PF3D7_0401000	RIF	rifin
Pf3D7_04_v3	79703	80542	Szt_H3K4_peak_233	45	.	1.73724	6.05958	4.57955	PF3D7_0401200	RIF	rifin
Pf3D7_04_v3	82345	83490	Szt_H3K4_peak_234	45	.	1.69935	6.02232	4.55224	PF3D7_0401300	RIF	rifin
Pf3D7_04_v3	85577	86794	Szt_H3K4_peak_235	37	.	1.60511	5.22728	3.79912	PF3D7_0401400	RIF	rifin
Pf3D7_04_v3	87244	87772	Szt_H3K4_peak_236	46	.	1.75731	6.10507	4.62546	intergenic
Pf3D7_04_v3	99536	102055	Szt_H3K4_peak_237	47	.	1.7028	6.24731	4.76268	intergenic
Pf3D7_04_v3	102846	103177	Szt_H3K4_peak_238	28	.	1.60612	4.1623	2.80704	PF3D7_0401800	PfD80	Plasmodium exported protein (PHISTb), unknown function
Pf3D7_04_v3	105721	105988	Szt_H3K4_peak_239	31	.	1.64052	4.56082	3.17881	intergenic
Pf3D7_04_v3	110090	112642	Szt_H3K4_peak_240	33	.	1.59844	4.71613	3.32644	intergenic
Pf3D7_04_v3	115244	116125	Szt_H3K4_peak_241	23	.	1.51654	3.6417	2.33297	intergenic
Pf3D7_04_v3	119461	119752	Szt_H3K4_peak_242	34	.	1.67122	4.8274	3.41931	intergenic
Pf3D7_04_v3	120415	122472	Szt_H3K4_peak_243	46	.	1.70915	6.14394	4.68946	intergenic
Pf3D7_04_v3	123050	123291	Szt_H3K4_peak_244	28	.	1.59167	4.17105	2.81597	PF3D7_0402100		Plasmodium exported protein (PHISTb), unknown function
Pf3D7_04_v3	125000	125543	Szt_H3K4_peak_245	13	.	1.4241	2.51189	1.30927	intergenic
Pf3D7_04_v3	151304	155972	Szt_H3K4_peak_246	45	.	1.71178	5.95972	4.50881	intergenic
Pf3D7_04_v3	156386	156822	Szt_H3K4_peak_247	39	.	1.63247	5.39886	3.96104	intergenic
Pf3D7_04_v3	157455	161266	Szt_H3K4_peak_248	32	.	1.57567	4.64824	3.26949	PF3D7_0402600		stevor
Pf3D7_04_v3	161803	162209	Szt_H3K4_peak_249	20	.	1.50005	3.37671	2.08745	intergenic
Pf3D7_04_v3	162721	168927	Szt_H3K4_peak_250	57	.	1.70667	7.29018	5.79507	intergenic
Pf3D7_04_v3	169354	171069	Szt_H3K4_peak_251	59	.	1.68891	7.46436	5.96303	intergenic
Pf3D7_04_v3	174462	175059	Szt_H3K4_peak_252	256	.	2.50899	27.6651	25.6677	PF3D7_0403100		regulator of chromosome condensation, putative
Pf3D7_04_v3	215876	216580	Szt_H3K4_peak_253	20	.	1.51368	3.28992	2.01254	intergenic
Pf3D7_04_v3	217897	218387	Szt_H3K4_peak_254	50	.	1.81442	6.55974	5.04166	PF3D7_0403900	SET8	SET domain protein, putative
Pf3D7_04_v3	223632	225132	Szt_H3K4_peak_255	179	.	2.47904	19.8821	17.9787	PF3D7_0404100	ApiAP2	AP2 domain transcription factor AP2-SP2, putative
Pf3D7_04_v3	239714	240391	Szt_H3K4_peak_256	100	.	2.08014	11.7275	10.0384	PF3D7_0404500	P52	6-cysteine protein P52
Pf3D7_04_v3	243166	243453	Szt_H3K4_peak_257	20	.	1.49923	3.38584	2.09997	intergenic
Pf3D7_04_v3	244372	244753	Szt_H3K4_peak_258	210	.	2.74955	23.045	21.0028	PF3D7_0404600		conserved Plasmodium membrane protein, unknown function
Pf3D7_04_v3	245207	245663	Szt_H3K4_peak_259	42	.	1.73475	5.71543	4.2609	PF3D7_0404600		conserved Plasmodium membrane protein, unknown function
Pf3D7_04_v3	263257	264824	Szt_H3K4_peak_260	161	.	2.23846	17.9006	16.1571	PF3D7_0404800		sporozoite-specific protein S10, putative
Pf3D7_04_v3	269184	269622	Szt_H3K4_peak_261	52	.	1.73129	6.79357	5.27303	PF3D7_0405000	DDX51	ATP-dependent RNA helicase DDX51, putative
Pf3D7_04_v3	278197	279120	Szt_H3K4_peak_262	45	.	1.74287	6.05844	4.58788	PF3D7_0405200	CERLI2	protein CERLI2
Pf3D7_04_v3	282495	283016	Szt_H3K4_peak_263	27	.	1.59011	4.09698	2.75019	PF3D7_0405300	LISP2	liver specific protein 2, putative
Pf3D7_04_v3	289408	289691	Szt_H3K4_peak_264	20	.	1.48403	3.31587	2.03384	PF3D7_0405400	PRPF8	pre-mRNA-processing-splicing factor 8, putative
Pf3D7_04_v3	313981	314315	Szt_H3K4_peak_265	62	.	1.83878	7.8553	6.28104	PF3D7_0405800		conserved protein, unknown function
Pf3D7_04_v3	318942	320546	Szt_H3K4_peak_266	214	.	2.64778	23.4423	21.4434	PF3D7_0406000		conserved protein, unknown function
Pf3D7_04_v3	332411	332710	Szt_H3K4_peak_267	30	.	1.62386	4.42772	3.05523	PF3D7_0406500		NYN domain-containing protein, putative
Pf3D7_04_v3	338082	338435	Szt_H3K4_peak_268	189	.	2.63703	20.9599	18.9713	intergenic
Pf3D7_04_v3	371713	372377	Szt_H3K4_peak_269	321	.	2.97453	34.2414	32.1128	PF3D7_0407600		conserved Plasmodium protein, unknown function
Pf3D7_04_v3	383716	384137	Szt_H3K4_peak_270	139	.	2.2916	15.8399	13.982	PF3D7_0407800	CINCH	protein CINCH
Pf3D7_04_v3	394890	396570	Szt_H3K4_peak_271	52	.	1.7412	6.68133	5.21562	PF3D7_0408100		conserved Plasmodium protein, unknown function
Pf3D7_04_v3	412149	412701	Szt_H3K4_peak_272	25	.	1.55192	3.92178	2.58877	PF3D7_0408600	SIAP1	sporozoite invasion-associated protein 1
Pf3D7_04_v3	421141	421709	Szt_H3K4_peak_273	74	.	1.95416	9.07535	7.43819	PF3D7_0408800		conserved Plasmodium protein, unknown function
Pf3D7_04_v3	422674	422955	Szt_H3K4_peak_274	21	.	1.50764	3.48562	2.18902	PF3D7_0408800		conserved Plasmodium protein, unknown function
Pf3D7_04_v3	458911	459521	Szt_H3K4_peak_275	112	.	2.14822	12.9628	11.2472	PF3D7_0409800		zinc finger protein, putative
Pf3D7_04_v3	468912	470058	Szt_H3K4_peak_276	149	.	2.22827	16.7363	14.9079	PF3D7_0410300	PPM1	protein phosphatase PPM1, putative
Pf3D7_04_v3	479975	480442	Szt_H3K4_peak_277	15	.	1.37187	2.76788	1.54067	PF3D7_0410700	RbgA	ribosome biogenesis GTPase A, putative
Pf3D7_04_v3	484836	485123	Szt_H3K4_peak_278	46	.	1.73652	6.13201	4.65251	PF3D7_0410800		conserved Plasmodium protein, unknown function
Pf3D7_04_v3	496027	496750	Szt_H3K4_peak_279	414	.	3.37517	43.5888	41.4363	intergenic
Pf3D7_04_v3	517566	518354	Szt_H3K4_peak_280	262	.	2.78493	28.4237	26.2973	PF3D7_0411700		conserved Plasmodium protein, unknown function
Pf3D7_04_v3	546573	548013	Szt_H3K4_peak_281	74	.	1.79982	9.01825	7.45019	intergenic
Pf3D7_04_v3	548458	549016	Szt_H3K4_peak_282	22	.	1.46108	3.5366	2.2382	intergenic
Pf3D7_04_v3	549506	553927	Szt_H3K4_peak_283	35	.	1.58729	4.97902	3.57228	intergenic
Pf3D7_04_v3	561393	561822	Szt_H3K4_peak_284	44	.	1.75933	5.90482	4.42919	PF3D7_0412700	VAR	erythrocyte membrane protein 1, PfEMP1
Pf3D7_04_v3	563705	569359	Szt_H3K4_peak_285	45	.	1.67936	6.0374	4.58563	intergenic
Pf3D7_04_v3	584462	584742	Szt_H3K4_peak_286	58	.	1.86923	7.42036	5.86511	intergenic
Pf3D7_04_v3	598636	599206	Szt_H3K4_peak_287	55	.	1.8365	7.0551	5.50819	intergenic
Pf3D7_04_v3	599623	600025	Szt_H3K4_peak_288	245	.	2.88592	26.6029	24.52	intergenic
Pf3D7_04_v3	603276	613349	Szt_H3K4_peak_289	52	.	1.68506	6.70433	5.20347	PF3D7_0413300	RIF	rifin
Pf3D7_04_v3	647434	647712	Szt_H3K4_peak_290	19	.	1.49718	3.2453	1.9685	PF3D7_0414200		calmodulin-like protein
Pf3D7_04_v3	665004	666021	Szt_H3K4_peak_291	26	.	1.55664	3.95802	2.62513	PF3D7_0414900	ARO	armadillo-domain containing rhoptry protein
Pf3D7_04_v3	666868	667210	Szt_H3K4_peak_292	20	.	1.45246	3.28938	2.01556	intergenic
Pf3D7_04_v3	705725	706514	Szt_H3K4_peak_293	45	.	1.73555	6.03362	4.57265	PF3D7_0416100	GATA	glutamyl-tRNA(Gln) amidotransferase subunit A
Pf3D7_04_v3	709532	710094	Szt_H3K4_peak_294	96	.	2.00824	11.3442	9.60183	PF3D7_0416200		PRKR-interacting protein 1, putative	PF3D7_0416300	MCM9	DNA helicase MCM9, putative
Pf3D7_04_v3	736676	737380	Szt_H3K4_peak_295	59	.	1.72523	7.50189	5.9422	intergenic
Pf3D7_04_v3	764881	765331	Szt_H3K4_peak_296	69	.	1.85069	8.53711	6.94002	intergenic
Pf3D7_04_v3	836399	836808	Szt_H3K4_peak_297	122	.	1.99281	14.045	12.254	intergenic
Pf3D7_04_v3	851522	851787	Szt_H3K4_peak_298	17	.	1.46937	3.03318	1.78114	PF3D7_0419100		conserved Plasmodium protein, unknown function
Pf3D7_04_v3	869347	869662	Szt_H3K4_peak_299	27	.	1.60408	4.11825	2.7639	PF3D7_0419600	RANBP1	ran-specific GTPase-activating protein 1, putative
Pf3D7_04_v3	872277	872912	Szt_H3K4_peak_300	89	.	2.10628	10.6467	8.92195	PF3D7_0419700	Pf34	apical merozoite protein
Pf3D7_04_v3	913050	915888	Szt_H3K4_peak_301	130	.	2.20876	14.8177	13.0866	intergenic
Pf3D7_04_v3	935063	935592	Szt_H3K4_peak_302	18	.	1.43082	3.06791	1.81174	PF3D7_0420700	VAR	erythrocyte membrane protein 1, PfEMP1
Pf3D7_04_v3	936128	937253	Szt_H3K4_peak_303	78	.	1.87372	9.53531	7.88975	intergenic
Pf3D7_04_v3	937856	939129	Szt_H3K4_peak_304	69	.	1.77146	8.53289	6.99081	intergenic
Pf3D7_04_v3	962957	965804	Szt_H3K4_peak_305	88	.	1.70268	10.4814	8.80496	intergenic
Pf3D7_04_v3	967529	968215	Szt_H3K4_peak_306	110	.	1.8752	12.8739	11.0617	PF3D7_0421200	RIF	rifin
Pf3D7_04_v3	968732	969219	Szt_H3K4_peak_307	92	.	1.86787	10.936	9.22352	PF3D7_0421300	VAR	erythrocyte membrane protein 1, PfEMP1
Pf3D7_04_v3	971100	976921	Szt_H3K4_peak_308	59	.	1.65539	7.51807	5.95797	intergenic
Pf3D7_04_v3	982373	984124	Szt_H3K4_peak_309	29	.	1.57847	4.3434	2.98076	intergenic
Pf3D7_04_v3	984818	985525	Szt_H3K4_peak_310	53	.	1.82006	6.94178	5.3958	intergenic
Pf3D7_04_v3	986000	987801	Szt_H3K4_peak_311	28	.	1.51424	4.22335	2.87423	PF3D7_0421700		conserved Plasmodium protein, unknown function
Pf3D7_04_v3	988317	988756	Szt_H3K4_peak_312	15	.	1.41375	2.81996	1.58681	PF3D7_0421700		conserved Plasmodium protein, unknown function
Pf3D7_04_v3	989934	991212	Szt_H3K4_peak_313	17	.	1.43187	3.05381	1.79996	intergenic
Pf3D7_04_v3	997954	998247	Szt_H3K4_peak_314	25	.	1.57415	3.87527	2.54516	PF3D7_0421900		conserved Plasmodium protein, unknown function	PF3D7_0422000		steroid dehydrogenase, putative
Pf3D7_04_v3	1020653	1021417	Szt_H3K4_peak_315	63	.	1.86143	7.94706	6.3903	PF3D7_0422300		alpha tubulin 2
Pf3D7_04_v3	1052432	1053494	Szt_H3K4_peak_316	18	.	1.48498	3.05704	1.80021	intergenic
Pf3D7_04_v3	1054679	1055638	Szt_H3K4_peak_317	120	.	2.21104	13.8466	12.0767	PF3D7_0423400	AARP	apical asparagine-rich protein AARP
Pf3D7_04_v3	1056701	1057710	Szt_H3K4_peak_318	62	.	1.91129	7.87033	6.28183	intergenic
Pf3D7_04_v3	1071403	1071838	Szt_H3K4_peak_319	39	.	1.65881	5.42476	3.98037	intergenic
Pf3D7_04_v3	1072295	1072819	Szt_H3K4_peak_320	38	.	1.71308	5.28299	3.84126	intergenic
Pf3D7_04_v3	1074681	1075294	Szt_H3K4_peak_321	31	.	1.63538	4.56298	3.18638	PF3D7_0423800	CyRPA	cysteine-rich protective antigen
Pf3D7_04_v3	1078789	1079527	Szt_H3K4_peak_322	23	.	1.55877	3.68269	2.36589	intergenic
Pf3D7_04_v3	1085272	1085515	Szt_H3K4_peak_323	31	.	1.57599	4.51557	3.13315	PF3D7_0424200	RH4	reticulocyte binding protein homologue 4
Pf3D7_04_v3	1117626	1117901	Szt_H3K4_peak_324	17	.	1.4884	3.05136	1.79382	intergenic
Pf3D7_04_v3	1123139	1124752	Szt_H3K4_peak_325	38	.	1.63909	5.32194	3.891	PF3D7_0424800		Plasmodium exported protein (PHISTb), unknown function
Pf3D7_04_v3	1125335	1126770	Szt_H3K4_peak_326	24	.	1.53967	3.71342	2.40087	intergenic
Pf3D7_04_v3	1127180	1132288	Szt_H3K4_peak_327	39	.	1.61968	5.33856	3.91318	intergenic
Pf3D7_04_v3	1132965	1133944	Szt_H3K4_peak_328	37	.	1.64671	5.20441	3.78298	PF3D7_0425100		Plasmodium exported protein (hyp6), unknown function
Pf3D7_04_v3	1134449	1134958	Szt_H3K4_peak_329	16	.	1.44806	2.88228	1.64334	PF3D7_0425100		Plasmodium exported protein (hyp6), unknown function
Pf3D7_04_v3	1135367	1136106	Szt_H3K4_peak_330	45	.	1.75635	6.01898	4.54345	PF3D7_0425200		Plasmodium exported protein (hyp15), unknown function
Pf3D7_04_v3	1136680	1137391	Szt_H3K4_peak_331	37	.	1.63221	5.21221	3.78237	PF3D7_0425200		Plasmodium exported protein (hyp15), unknown function
Pf3D7_04_v3	1137908	1143722	Szt_H3K4_peak_332	38	.	1.63171	5.23116	3.82696	intergenic
Pf3D7_04_v3	1144206	1147094	Szt_H3K4_peak_333	34	.	1.59792	4.8825	3.48606	intergenic
Pf3D7_04_v3	1152547	1153171	Szt_H3K4_peak_334	26	.	1.53099	3.9934	2.65892	PF3D7_0425700	RIF	rifin
Pf3D7_04_v3	1156175	1158805	Szt_H3K4_peak_335	50	.	1.71245	6.50023	5.00523	intergenic
Pf3D7_04_v3	1159319	1164368	Szt_H3K4_peak_336	31	.	1.54824	4.49746	3.13026	intergenic
Pf3D7_04_v3	1174920	1180520	Szt_H3K4_peak_337	163	.	2.29721	18.2353	16.37	intergenic
Pf3D7_04_v3	1181064	1181596	Szt_H3K4_peak_338	900	.	5.11716	92.8696	90.0736	intergenic
Pf3D7_04_v3	1182247	1183004	Szt_H3K4_peak_339	1222	.	5.5056	125.393	122.269	intergenic
Pf3D7_04_v3	1183819	1184939	Szt_H3K4_peak_340	13	.	1.43588	2.60138	1.38845	intergenic
Pf3D7_04_v3	1186859	1187332	Szt_H3K4_peak_341	12	.	1.4215	2.4801	1.28034	intergenic
Pf3D7_04_v3	1188949	1192711	Szt_H3K4_peak_342	112	.	2.1496	13.0246	11.2797	intergenic
Pf3D7_05_v3	23625	26383	Szt_H3K4_peak_343	65	.	1.81958	8.12898	6.58681	intergenic
Pf3D7_05_v3	29784	30766	Szt_H3K4_peak_344	92	.	2.02771	10.9576	9.24073	intergenic
Pf3D7_05_v3	33060	34185	Szt_H3K4_peak_345	69	.	1.87663	8.63529	6.99786	PF3D7_0500400	RIF	rifin
Pf3D7_05_v3	36845	37401	Szt_H3K4_peak_346	19	.	1.50861	3.22493	1.95043	PF3D7_0500500	RIF	rifin
Pf3D7_05_v3	37975	39849	Szt_H3K4_peak_347	34	.	1.61859	4.83498	3.43862	intergenic
Pf3D7_05_v3	40314	42398	Szt_H3K4_peak_348	32	.	1.61396	4.65694	3.27407	PF3D7_0500800	MESA	mature parasite-infected erythrocyte surface antigen
Pf3D7_05_v3	48412	48721	Szt_H3K4_peak_349	50	.	1.81281	6.55576	5.03913	intergenic
Pf3D7_05_v3	49174	49625	Szt_H3K4_peak_350	15	.	1.45857	2.7934	1.56179	PF3D7_0500900	FIKK5	serine/threonine protein kinase, FIKK family
Pf3D7_05_v3	52761	53123	Szt_H3K4_peak_351	17	.	1.47919	3.01618	1.76345	intergenic
Pf3D7_05_v3	53584	54068	Szt_H3K4_peak_352	20	.	1.49681	3.31203	2.03136	intergenic
Pf3D7_05_v3	66672	67076	Szt_H3K4_peak_353	43	.	1.75757	5.8668	4.39219	PF3D7_0501300	SBP1	skeleton-binding protein 1
Pf3D7_05_v3	71491	73424	Szt_H3K4_peak_354	32	.	1.63167	4.58054	3.20136	PF3D7_0501400	FIRA	interspersed repeat antigen
Pf3D7_05_v3	82176	83579	Szt_H3K4_peak_355	162	.	2.46456	18.0954	16.2083	PF3D7_0501600	RAP2	rhoptry-associated protein 2
Pf3D7_05_v3	85677	87083	Szt_H3K4_peak_356	164	.	2.38343	18.3542	16.4837	PF3D7_0501700	APC3	anaphase-promoting complex subunit 3, putative
Pf3D7_05_v3	138268	140843	Szt_H3K4_peak_357	123	.	2.16108	14.0023	12.3281	PF3D7_0503400	ADF1	actin-depolymerizing factor 1
Pf3D7_05_v3	145889	146746	Szt_H3K4_peak_358	34	.	1.62991	4.84532	3.44552	PF3D7_0503600	MyoB	myosin B
Pf3D7_05_v3	150223	151164	Szt_H3K4_peak_359	131	.	2.24763	14.9603	13.1713	PF3D7_0503800	RPL31	60S ribosomal protein L31
Pf3D7_05_v3	152668	153345	Szt_H3K4_peak_360	21	.	1.51441	3.41257	2.12485	PF3D7_0503900		conserved Plasmodium protein, unknown function
Pf3D7_05_v3	155106	155535	Szt_H3K4_peak_361	37	.	1.63464	5.17043	3.74335	intergenic
Pf3D7_05_v3	263430	263898	Szt_H3K4_peak_362	18	.	1.45981	3.11769	1.85506	PF3D7_0506400		conserved Plasmodium protein, unknown function	PF3D7_0506500		conserved Plasmodium protein, unknown function
Pf3D7_05_v3	291814	292448	Szt_H3K4_peak_363	73	.	1.98596	9.02436	7.3853	PF3D7_0507000		conserved protein, unknown function
Pf3D7_05_v3	300534	300776	Szt_H3K4_peak_364	31	.	1.60892	4.52787	3.15071	PF3D7_0507300	SOPT	subtilisin-like ookinete protein SOPT
Pf3D7_05_v3	305934	306985	Szt_H3K4_peak_365	18	.	1.44807	3.13275	1.86943	PF3D7_0507500	SUB1	subtilisin-like protease 1
Pf3D7_05_v3	310415	310846	Szt_H3K4_peak_366	79	.	1.99606	9.60605	7.9558	intergenic
Pf3D7_05_v3	330409	330959	Szt_H3K4_peak_367	31	.	1.57784	4.52419	3.15029	PF3D7_0508100	SET9	SET domain protein, putative
Pf3D7_05_v3	355536	355820	Szt_H3K4_peak_368	93	.	2.02562	11.0557	9.32571	PF3D7_0508600		conserved protein, unknown function
Pf3D7_05_v3	365320	366305	Szt_H3K4_peak_369	186	.	2.61147	20.6657	18.6573	PF3D7_0508900	AAP6	protein AAP6
Pf3D7_05_v3	405985	406422	Szt_H3K4_peak_370	68	.	1.84344	8.46573	6.84349	PF3D7_0509700		conserved Plasmodium protein, unknown function
Pf3D7_05_v3	432794	433147	Szt_H3K4_peak_371	23	.	1.52648	3.63675	2.32632	intergenic
Pf3D7_05_v3	434419	435535	Szt_H3K4_peak_372	263	.	2.854	28.3586	26.3595	intergenic
Pf3D7_05_v3	449844	450217	Szt_H3K4_peak_373	35	.	1.61238	4.95909	3.54224	intergenic
Pf3D7_05_v3	451214	451541	Szt_H3K4_peak_374	74	.	1.73187	9.13268	7.48488	intergenic
Pf3D7_05_v3	461604	461945	Szt_H3K4_peak_375	20	.	1.47026	3.30479	2.02457	PF3D7_0510800		WD repeat-containing protein, putative
Pf3D7_05_v3	463726	464022	Szt_H3K4_peak_376	25	.	1.52955	3.84394	2.51617	intergenic
Pf3D7_05_v3	464921	466082	Szt_H3K4_peak_377	65	.	1.85933	8.08032	6.51507	intergenic
Pf3D7_05_v3	480203	480903	Szt_H3K4_peak_378	49	.	1.77568	6.40282	4.90323	PF3D7_0511400		conserved Plasmodium protein, unknown function
Pf3D7_05_v3	497056	497295	Szt_H3K4_peak_379	13	.	1.3601	2.54014	1.33772	intergenic
Pf3D7_05_v3	499541	499926	Szt_H3K4_peak_380	44	.	1.61016	5.92414	4.44089	intergenic
Pf3D7_05_v3	517955	518711	Szt_H3K4_peak_381	452	.	3.38229	47.5936	45.2858	PF3D7_0511700	CGI121	EKC/KEOPS complex subunit CGI121
Pf3D7_05_v3	573607	573899	Szt_H3K4_peak_382	40	.	1.65329	5.52437	4.07438	PF3D7_0513500	PAM16	mitochondrial import inner membrane translocase subunit TIM16, putative	PF3D7_0513600		deoxyribodipyrimidine photo-lyase, putative
Pf3D7_05_v3	627506	628012	Szt_H3K4_peak_383	17	.	1.44103	3.05277	1.79727	PF3D7_0515200		conserved Plasmodium protein, unknown function
Pf3D7_05_v3	635880	636858	Szt_H3K4_peak_384	310	.	2.97866	33.1601	31.0635	PF3D7_0515400		conserved protein, unknown function
Pf3D7_05_v3	640353	641424	Szt_H3K4_peak_385	20	.	1.48332	3.2806	2.00632	PF3D7_0515500	GEP1	gametogenesis essential protein 1, putative
Pf3D7_05_v3	656027	658016	Szt_H3K4_peak_386	147	.	2.3654	16.5799	14.7499	PF3D7_0515800		BolA-like protein, putative
Pf3D7_05_v3	693169	693619	Szt_H3K4_peak_387	16	.	1.46657	2.91208	1.67129	PF3D7_0516700		ubiquitin carboxyl-terminal hydrolase 2, putative
Pf3D7_05_v3	711020	711942	Szt_H3K4_peak_388	74	.	1.9718	9.08696	7.46787	PF3D7_0516900	RPL2	60S ribosomal protein L2
Pf3D7_05_v3	793357	794003	Szt_H3K4_peak_389	76	.	1.98703	9.25712	7.62445	intergenic
Pf3D7_05_v3	810559	811151	Szt_H3K4_peak_390	23	.	1.52802	3.60471	2.30374	PF3D7_0519600		zinc finger protein, putative
Pf3D7_05_v3	813599	814157	Szt_H3K4_peak_391	55	.	1.75903	7.13771	5.59738	intergenic
Pf3D7_05_v3	815731	816174	Szt_H3K4_peak_392	396	.	3.49745	41.9117	39.6103	PF3D7_0519700		FoP domain-containing protein, putative
Pf3D7_05_v3	818580	818844	Szt_H3K4_peak_393	22	.	1.5248	3.50441	2.20573	intergenic
Pf3D7_05_v3	880877	881284	Szt_H3K4_peak_394	16	.	1.42733	2.83479	1.60141	intergenic
Pf3D7_05_v3	900778	901148	Szt_H3K4_peak_395	52	.	1.80492	6.81939	5.29377	PF3D7_0522200	TAF10	transcription initiation factor TFIID subunit 10, putative
Pf3D7_05_v3	905966	906724	Szt_H3K4_peak_396	53	.	1.77775	6.80489	5.30426	PF3D7_0522400		conserved Plasmodium protein, unknown function
Pf3D7_05_v3	938599	938870	Szt_H3K4_peak_397	69	.	1.94046	8.56062	6.92703	PF3D7_0522600		magnesium transporter NIPA, putative
Pf3D7_05_v3	954680	955658	Szt_H3K4_peak_398	61	.	1.81747	7.74045	6.18617	PF3D7_0523000	MDR1	multidrug resistance protein 1
Pf3D7_05_v3	971855	972256	Szt_H3K4_peak_399	24	.	1.55789	3.80229	2.47701	PF3D7_0523400		DnaJ protein, putative
Pf3D7_05_v3	994808	995392	Szt_H3K4_peak_400	158	.	2.37787	17.7736	15.8603	PF3D7_0524000	KASbeta	karyopherin beta
Pf3D7_05_v3	1009968	1010457	Szt_H3K4_peak_401	110	.	2.13203	12.7555	11.0195	PF3D7_0524300		conserved Plasmodium protein, unknown function
Pf3D7_05_v3	1019540	1019872	Szt_H3K4_peak_402	29	.	1.53796	4.2701	2.91291	PF3D7_0524700	TOM22	mitochondrial import receptor subunit TOM22, putative
Pf3D7_05_v3	1025770	1026119	Szt_H3K4_peak_403	14	.	1.40342	2.67052	1.45338	PF3D7_0524900	TYW1	S-adenosyl-L-methionine-dependent tRNA 4-demethylwyosine synthase, putative
Pf3D7_05_v3	1039743	1040433	Szt_H3K4_peak_404	12	.	1.40785	2.49574	1.29706	PF3D7_0525100	ACS10	acyl-CoA synthetase
Pf3D7_05_v3	1055067	1055384	Szt_H3K4_peak_405	45	.	1.76644	5.99746	4.51643	intergenic
Pf3D7_05_v3	1069204	1070834	Szt_H3K4_peak_406	129	.	2.29928	14.8012	12.9773	intergenic
Pf3D7_05_v3	1071309	1071825	Szt_H3K4_peak_407	25	.	1.54862	3.87638	2.55038	PF3D7_0525800	IMC1g	inner membrane complex protein 1g, putative
Pf3D7_05_v3	1083664	1084344	Szt_H3K4_peak_408	34	.	1.63119	4.81249	3.41316	intergenic
Pf3D7_05_v3	1097604	1098275	Szt_H3K4_peak_409	180	.	2.59411	19.9962	18.0321	PF3D7_0526600		conserved Plasmodium protein, unknown function
Pf3D7_05_v3	1099530	1100085	Szt_H3K4_peak_410	178	.	2.56883	19.828	17.8723	PF3D7_0526600		conserved Plasmodium protein, unknown function
Pf3D7_05_v3	1104419	1104817	Szt_H3K4_peak_411	117	.	2.14334	13.5425	11.736	intergenic
Pf3D7_05_v3	1136083	1136511	Szt_H3K4_peak_412	21	.	1.45565	3.41891	2.12942	PF3D7_0527300	METAP1a	methionine aminopeptidase 1a, putative
Pf3D7_05_v3	1150028	1151467	Szt_H3K4_peak_413	330	.	2.81404	35.2119	33.0553	intergenic
Pf3D7_05_v3	1169078	1170121	Szt_H3K4_peak_414	27	.	1.5897	4.04301	2.70237	PF3D7_0528400	DHHC7	palmitoyltransferase DHHC7
Pf3D7_05_v3	1181294	1181642	Szt_H3K4_peak_415	37	.	1.59713	5.1244	3.70591	intergenic
Pf3D7_05_v3	1198041	1198347	Szt_H3K4_peak_416	60	.	1.87062	7.58112	6.01453	PF3D7_0529400		conserved Plasmodium protein, unknown function
Pf3D7_05_v3	1208193	1208637	Szt_H3K4_peak_417	388	.	3.14246	41.1613	38.8614	PF3D7_0529700		heptatricopeptide repeat-containing protein, putative
Pf3D7_05_v3	1223388	1223784	Szt_H3K4_peak_418	82	.	2.04623	9.93629	8.25836	PF3D7_0530000		conserved Plasmodium protein, unknown function
Pf3D7_05_v3	1231974	1232843	Szt_H3K4_peak_419	30	.	1.61115	4.42048	3.05221	PF3D7_0530300	PIC6	PhIL1-interacting candidate PIC6
Pf3D7_05_v3	1279146	1279681	Szt_H3K4_peak_420	25	.	1.5418	3.87587	2.55167	PF3D7_0531200		ribosomal protein S16, mitochondrial, putative
Pf3D7_05_v3	1287105	1289204	Szt_H3K4_peak_421	166	.	2.45463	18.5501	16.6803	intergenic
Pf3D7_05_v3	1291606	1292043	Szt_H3K4_peak_422	30	.	1.62789	4.41195	3.03963	intergenic
Pf3D7_05_v3	1296388	1298593	Szt_H3K4_peak_423	81	.	1.9196	9.7589	8.10634	intergenic
Pf3D7_05_v3	1299134	1300718	Szt_H3K4_peak_424	359	.	3.07115	38.0315	35.9703	PF3D7_0532100	ETRAMP5	early transcribed membrane protein 5
Pf3D7_05_v3	1305274	1305921	Szt_H3K4_peak_425	20	.	1.52346	3.36973	2.08223	intergenic
Pf3D7_05_v3	1306840	1307580	Szt_H3K4_peak_426	20	.	1.51715	3.31525	2.03382	PF3D7_0532300		Plasmodium exported protein (PHISTb), unknown function
Pf3D7_05_v3	1318465	1318932	Szt_H3K4_peak_427	27	.	1.56413	4.06838	2.71885	PF3D7_0532600		Plasmodium exported protein, unknown function
Pf3D7_05_v3	1319347	1321229	Szt_H3K4_peak_428	41	.	1.69318	5.56592	4.11995	intergenic
Pf3D7_05_v3	1321985	1323214	Szt_H3K4_peak_429	33	.	1.62143	4.79931	3.39938	intergenic
Pf3D7_05_v3	1323661	1325162	Szt_H3K4_peak_430	65	.	1.79629	8.17539	6.59493	intergenic
Pf3D7_05_v3	1326779	1327488	Szt_H3K4_peak_431	58	.	1.79931	7.39358	5.82577	PF3D7_0532900	RIF	rifin
Pf3D7_05_v3	1328561	1332401	Szt_H3K4_peak_432	107	.	2.1101	12.4932	10.7601	intergenic
Pf3D7_05_v3	1333349	1342989	Szt_H3K4_peak_433	148	.	2.27273	16.7369	14.8452	intergenic
Pf3D7_06_v3	577	1871	Szt_H3K4_peak_434	163	.	2.44429	18.3855	16.399	intergenic
Pf3D7_06_v3	2847	11149	Szt_H3K4_peak_435	112	.	2.0762	12.9786	11.2032	intergenic
Pf3D7_06_v3	15160	15845	Szt_H3K4_peak_436	33	.	1.57273	4.77176	3.37845	PF3D7_0600300	RIF	rifin
Pf3D7_06_v3	22000	23060	Szt_H3K4_peak_437	58	.	1.80643	7.44826	5.89061	intergenic
Pf3D7_06_v3	30718	31008	Szt_H3K4_peak_438	47	.	1.78594	6.24906	4.75351	intergenic
Pf3D7_06_v3	31971	32805	Szt_H3K4_peak_439	104	.	2.07935	12.2204	10.4186	PF3D7_0600700	RIF	rifin
Pf3D7_06_v3	35907	36273	Szt_H3K4_peak_440	23	.	1.53693	3.63906	2.33338	intergenic
Pf3D7_06_v3	38541	39388	Szt_H3K4_peak_441	51	.	1.72141	6.67911	5.16307	intergenic
Pf3D7_06_v3	74257	74497	Szt_H3K4_peak_442	45	.	1.77405	6.09437	4.59991	intergenic
Pf3D7_06_v3	76478	77200	Szt_H3K4_peak_443	24	.	1.53443	3.74244	2.42488	PF3D7_0601900		conserved Plasmodium protein, unknown function
Pf3D7_06_v3	177495	180470	Szt_H3K4_peak_444	493	.	3.64718	51.6645	49.3233	intergenic
Pf3D7_06_v3	186888	187188	Szt_H3K4_peak_445	13	.	1.41525	2.52662	1.32481	intergenic
Pf3D7_06_v3	214470	215135	Szt_H3K4_peak_446	42	.	1.6888	5.65793	4.20406	PF3D7_0605100	KH1	KH domain-containing protein, putative
Pf3D7_06_v3	262949	263850	Szt_H3K4_peak_447	86	.	1.9817	10.2752	8.63779	PF3D7_0606300		conserved Plasmodium protein, unknown function	PF3D7_0606400		conserved Plasmodium protein, unknown function
Pf3D7_06_v3	317707	318773	Szt_H3K4_peak_448	218	.	2.78054	23.8919	21.8188	intergenic
Pf3D7_06_v3	354277	354601	Szt_H3K4_peak_449	41	.	1.72465	5.57517	4.11648	PF3D7_0608600		conserved Plasmodium protein, unknown function
Pf3D7_06_v3	360990	361407	Szt_H3K4_peak_450	95	.	2.086	11.3208	9.59763	PF3D7_0608800	OAT	ornithine aminotransferase
Pf3D7_06_v3	391288	391924	Szt_H3K4_peak_451	20	.	1.50017	3.3261	2.04299	PF3D7_0609200		citrate synthase-like protein, putative
Pf3D7_06_v3	403624	403885	Szt_H3K4_peak_452	13	.	1.3894	2.52672	1.32537	intergenic
Pf3D7_06_v3	411302	411726	Szt_H3K4_peak_453	41	.	1.6433	5.62863	4.17461	PF3D7_0609700	KIC6	protein KIC6
Pf3D7_06_v3	423557	425324	Szt_H3K4_peak_454	94	.	2.04432	11.0688	9.43679	PF3D7_0609900		conserved Plasmodium protein, unknown function
Pf3D7_06_v3	441685	442531	Szt_H3K4_peak_455	24	.	1.50198	3.74147	2.43353	intergenic
Pf3D7_06_v3	443529	444098	Szt_H3K4_peak_456	216	.	2.7925	23.6845	21.6154	PF3D7_0610400	H3	histone H3	PF3D7_0610500		peptidyl-tRNA hydrolase PTRHD1, putative
Pf3D7_06_v3	444587	444828	Szt_H3K4_peak_457	16	.	1.41012	2.9069	1.66444	PF3D7_0610400	H3	histone H3	PF3D7_0610500		peptidyl-tRNA hydrolase PTRHD1, putative
Pf3D7_06_v3	447941	448260	Szt_H3K4_peak_458	22	.	1.55008	3.59158	2.28172	PF3D7_0610600	CDPK2	calcium-dependent protein kinase 2
Pf3D7_06_v3	470299	471247	Szt_H3K4_peak_459	21	.	1.44886	3.43014	2.14319	PF3D7_0611400	SWIB	SWI/SNF-related matrix-associated actin-dependent regulator of chromatin
Pf3D7_06_v3	476069	477869	Szt_H3K4_peak_460	23	.	1.50856	3.63525	2.32959	intergenic
Pf3D7_06_v3	481602	482091	Szt_H3K4_peak_461	19	.	1.49957	3.24128	1.96834	PF3D7_0611500		conserved protein, unknown function
Pf3D7_06_v3	486947	488118	Szt_H3K4_peak_462	123	.	2.1403	14.0866	12.3705	PF3D7_0611700	RPL39	60S ribosomal protein L39
Pf3D7_06_v3	489725	490375	Szt_H3K4_peak_463	33	.	1.60734	4.77951	3.39285	PF3D7_0611800		conserved Plasmodium protein, unknown function
Pf3D7_06_v3	498547	498930	Szt_H3K4_peak_464	142	.	2.32432	16.1081	14.223	intergenic
Pf3D7_06_v3	503875	504119	Szt_H3K4_peak_465	40	.	1.73176	5.55392	4.09912	intergenic
Pf3D7_06_v3	537930	538412	Szt_H3K4_peak_466	13	.	1.41873	2.57638	1.36736	PF3D7_0613200		conserved Plasmodium protein, unknown function
Pf3D7_06_v3	545090	546303	Szt_H3K4_peak_467	67	.	1.88322	8.33482	6.73521	intergenic
Pf3D7_06_v3	556426	556998	Szt_H3K4_peak_468	136	.	2.2859	15.5007	13.6378	intergenic
Pf3D7_06_v3	562326	563688	Szt_H3K4_peak_469	24	.	1.55797	3.73698	2.42142	intergenic
Pf3D7_06_v3	564334	565516	Szt_H3K4_peak_470	54	.	1.82164	6.98716	5.47435	intergenic
Pf3D7_06_v3	582245	582503	Szt_H3K4_peak_471	34	.	1.57226	4.85559	3.44762	intergenic
Pf3D7_06_v3	585686	587465	Szt_H3K4_peak_472	101	.	1.98757	11.8654	10.1629	PF3D7_0614000		thiamine-phosphate synthase, putative
Pf3D7_06_v3	592467	592822	Szt_H3K4_peak_473	90	.	2.0281	10.6996	9.00236	PF3D7_0614200	NAR1	cytosolic Fe-S cluster assembly factor NAR1, putative
Pf3D7_06_v3	610792	611939	Szt_H3K4_peak_474	171	.	2.36205	18.9301	17.1637	PF3D7_0614700		F-box protein FBXO6, putative
Pf3D7_06_v3	672094	672681	Szt_H3K4_peak_475	76	.	1.88043	9.28179	7.66204	PF3D7_0616100		conserved Plasmodium protein, unknown function
Pf3D7_06_v3	716246	716489	Szt_H3K4_peak_476	23	.	1.55359	3.66008	2.3481	intergenic
Pf3D7_06_v3	719621	719977	Szt_H3K4_peak_477	29	.	1.62408	4.35798	2.98839	PF3D7_0617300		RNA-binding protein, putative
Pf3D7_06_v3	727061	731937	Szt_H3K4_peak_478	58	.	1.73	7.33065	5.80401	intergenic
Pf3D7_06_v3	732663	732939	Szt_H3K4_peak_479	30	.	1.60971	4.42756	3.0603	intergenic
Pf3D7_06_v3	734063	744510	Szt_H3K4_peak_480	46	.	1.67098	6.13555	4.66211	intergenic
Pf3D7_06_v3	747028	747419	Szt_H3K4_peak_481	19	.	1.50334	3.26267	1.98562	PF3D7_0617800	H2A	histone H2A
Pf3D7_06_v3	748532	748876	Szt_H3K4_peak_482	74	.	1.83622	9.1334	7.48069	intergenic
Pf3D7_06_v3	749533	750474	Szt_H3K4_peak_483	84	.	1.98373	10.0758	8.47986	intergenic
Pf3D7_06_v3	751135	751460	Szt_H3K4_peak_484	19	.	1.45871	3.25597	1.98037	intergenic
Pf3D7_06_v3	754397	754766	Szt_H3K4_peak_485	34	.	1.61889	4.85643	3.44948	intergenic
Pf3D7_06_v3	756316	758676	Szt_H3K4_peak_486	394	.	3.21743	41.6061	39.4908	PF3D7_0618000		conserved Plasmodium membrane protein, unknown function
Pf3D7_06_v3	819034	819463	Szt_H3K4_peak_487	22	.	1.49011	3.58722	2.27915	PF3D7_0619500	ACS12	acyl-CoA synthetase
Pf3D7_06_v3	847770	848255	Szt_H3K4_peak_488	34	.	1.65557	4.85504	3.45644	PF3D7_0620300		conserved Plasmodium protein, unknown function
Pf3D7_06_v3	860601	862028	Szt_H3K4_peak_489	352	.	2.92623	37.4978	35.2626	intergenic
Pf3D7_06_v3	877329	877843	Szt_H3K4_peak_490	57	.	1.75179	7.32878	5.78611	PF3D7_0621350	SYS1	protein SYS1, putative	PF3D7_0621400	ALV7	Pf77 protein
Pf3D7_06_v3	879122	879509	Szt_H3K4_peak_491	20	.	1.41559	3.37232	2.08791	PF3D7_0621400	ALV7	Pf77 protein
Pf3D7_06_v3	883434	883803	Szt_H3K4_peak_492	118	.	2.14789	13.6385	11.8315	PF3D7_0621700		RAP protein, putative
Pf3D7_06_v3	933302	933563	Szt_H3K4_peak_493	44	.	1.76902	5.93173	4.44669	intergenic
Pf3D7_06_v3	935303	936072	Szt_H3K4_peak_494	236	.	2.80962	25.71	23.686	PF3D7_0623000	CS	chorismate synthase
Pf3D7_06_v3	951942	952550	Szt_H3K4_peak_495	55	.	1.84285	7.03939	5.5026	PF3D7_0623500	SOD2	superoxide dismutase [Fe]
Pf3D7_06_v3	973217	973692	Szt_H3K4_peak_496	111	.	2.22624	12.986	11.1934	intergenic
Pf3D7_06_v3	993290	994580	Szt_H3K4_peak_497	34	.	1.6116	4.86518	3.46934	PF3D7_0624500	APC11	anaphase-promoting complex subunit 11, putative
Pf3D7_06_v3	995467	995938	Szt_H3K4_peak_498	257	.	2.96101	27.9167	25.7727	intergenic
Pf3D7_06_v3	997921	998256	Szt_H3K4_peak_499	20	.	1.51339	3.35656	2.07335	PF3D7_0624600	ISWI	ISWI chromatin-remodeling complex ATPase
Pf3D7_06_v3	1055567	1055842	Szt_H3K4_peak_500	32	.	1.63194	4.60665	3.22444	PF3D7_0626100		oxidoreductase, short-chain dehydrogenase family, putative
Pf3D7_06_v3	1083746	1084224	Szt_H3K4_peak_501	76	.	1.88245	9.32913	7.6688	PF3D7_0627000		conserved Plasmodium protein, unknown function
Pf3D7_06_v3	1105846	1106225	Szt_H3K4_peak_502	47	.	1.75488	6.272	4.78104	PF3D7_0627700		transportin
Pf3D7_06_v3	1154259	1155336	Szt_H3K4_peak_503	363	.	3.09169	38.4486	36.3344	intergenic
Pf3D7_06_v3	1169528	1170283	Szt_H3K4_peak_504	122	.	2.28031	14.1126	12.2936	PF3D7_0628300	CEPT	choline/ethanolaminephosphotransferase, putative
Pf3D7_06_v3	1171390	1172234	Szt_H3K4_peak_505	16	.	1.46747	2.93169	1.68533	intergenic
Pf3D7_06_v3	1174101	1175102	Szt_H3K4_peak_506	61	.	1.8765	7.69305	6.13789	intergenic
Pf3D7_06_v3	1203459	1204618	Szt_H3K4_peak_507	46	.	1.77317	6.16812	4.68433	PF3D7_0629300	PL	phospholipase, putative
Pf3D7_06_v3	1219746	1220194	Szt_H3K4_peak_508	52	.	1.78661	6.79522	5.26985	intergenic
Pf3D7_06_v3	1274280	1274544	Szt_H3K4_peak_509	25	.	1.57603	3.91865	2.58486	intergenic
Pf3D7_06_v3	1294091	1294768	Szt_H3K4_peak_510	50	.	1.78428	6.55159	5.0657	PF3D7_0631000		tetratricopeptide repeat protein, putative
Pf3D7_06_v3	1330226	1330945	Szt_H3K4_peak_511	59	.	1.78163	7.52448	5.95978	PF3D7_0631800	RIF	rifin
Pf3D7_06_v3	1333153	1334054	Szt_H3K4_peak_512	58	.	1.75081	7.4314	5.88422	PF3D7_0631900		stevor
Pf3D7_06_v3	1334675	1334991	Szt_H3K4_peak_513	39	.	1.71436	5.38076	3.93572	intergenic
Pf3D7_06_v3	1335500	1338599	Szt_H3K4_peak_514	39	.	1.64338	5.38133	3.96055	PF3D7_0632000	RIF	rifin
Pf3D7_06_v3	1341440	1342103	Szt_H3K4_peak_515	30	.	1.58188	4.43435	3.0694	PF3D7_0632200	RIF	rifin
Pf3D7_06_v3	1348994	1349815	Szt_H3K4_peak_516	37	.	1.69127	5.20969	3.78882	intergenic
Pf3D7_06_v3	1351704	1352021	Szt_H3K4_peak_517	35	.	1.59723	5.00076	3.58272	intergenic
Pf3D7_06_v3	1355054	1355466	Szt_H3K4_peak_518	40	.	1.72904	5.48303	4.02953	intergenic
Pf3D7_06_v3	1356042	1357865	Szt_H3K4_peak_519	37	.	1.60316	5.13355	3.71728	intergenic
Pf3D7_06_v3	1358405	1366604	Szt_H3K4_peak_520	36	.	1.60482	5.0722	3.67063	intergenic
Pf3D7_06_v3	1368412	1368868	Szt_H3K4_peak_521	36	.	1.65985	5.11335	3.68182	intergenic
Pf3D7_06_v3	1372080	1372751	Szt_H3K4_peak_522	49	.	1.75232	6.47781	4.97797	PF3D7_0632700	RIF	rifin
Pf3D7_06_v3	1376256	1376684	Szt_H3K4_peak_523	66	.	1.92501	8.25696	6.6633	intergenic
Pf3D7_06_v3	1377334	1382816	Szt_H3K4_peak_524	95	.	1.97115	11.2376	9.57645	intergenic
Pf3D7_06_v3	1383489	1385297	Szt_H3K4_peak_525	499	.	3.7112	52.2795	49.9556	intergenic
Pf3D7_06_v3	1405030	1406762	Szt_H3K4_peak_526	452	.	3.24357	47.5231	45.2578	intergenic
Pf3D7_06_v3	1407757	1408104	Szt_H3K4_peak_527	241	.	2.8923	26.2994	24.1996	intergenic
Pf3D7_06_v3	1409096	1410248	Szt_H3K4_peak_528	352	.	3.29285	37.495	35.2729	intergenic
Pf3D7_07_v3	8167	11487	Szt_H3K4_peak_529	294	.	2.94458	31.5796	29.4545	intergenic
Pf3D7_07_v3	16620	18166	Szt_H3K4_peak_530	878	.	4.58994	90.5315	87.8558	intergenic
Pf3D7_07_v3	18808	19556	Szt_H3K4_peak_531	1538	.	6.8196	157.441	153.849	intergenic
Pf3D7_07_v3	20083	25891	Szt_H3K4_peak_532	121	.	2.04591	13.8262	12.1551	intergenic
Pf3D7_07_v3	30325	31178	Szt_H3K4_peak_533	67	.	1.84846	8.35628	6.77159	PF3D7_0700200	RIF	rifin
Pf3D7_07_v3	34381	35400	Szt_H3K4_peak_534	48	.	1.73426	6.32165	4.82516	intergenic
Pf3D7_07_v3	36878	37343	Szt_H3K4_peak_535	89	.	2.02966	10.6373	8.91381	PF3D7_0700400		stevor
Pf3D7_07_v3	38491	38749	Szt_H3K4_peak_536	25	.	1.58625	3.92178	2.58139	intergenic
Pf3D7_07_v3	40348	41392	Szt_H3K4_peak_537	44	.	1.67851	5.90918	4.43514	PF3D7_0700500	RIF	rifin
Pf3D7_07_v3	42582	43150	Szt_H3K4_peak_538	42	.	1.70282	5.65568	4.20078	intergenic
Pf3D7_07_v3	50401	50661	Szt_H3K4_peak_539	29	.	1.62007	4.32103	2.95486	intergenic
Pf3D7_07_v3	59255	59935	Szt_H3K4_peak_540	58	.	1.76241	7.42761	5.87635	intergenic
Pf3D7_07_v3	73879	75422	Szt_H3K4_peak_541	38	.	1.70383	5.27772	3.8382	intergenic
Pf3D7_07_v3	75941	79157	Szt_H3K4_peak_542	39	.	1.61259	5.41232	3.97594	intergenic
Pf3D7_07_v3	79818	81216	Szt_H3K4_peak_543	23	.	1.47848	3.63331	2.33286	intergenic
Pf3D7_07_v3	86957	88323	Szt_H3K4_peak_544	33	.	1.65502	4.787	3.39494	intergenic
Pf3D7_07_v3	89171	89899	Szt_H3K4_peak_545	13	.	1.39614	2.60481	1.39469	intergenic
Pf3D7_07_v3	93850	94907	Szt_H3K4_peak_546	49	.	1.79429	6.48971	4.98714	intergenic
Pf3D7_07_v3	99890	100962	Szt_H3K4_peak_547	71	.	1.94611	8.80211	7.17612	PF3D7_0702400	SEMP1	small exported membrane protein 1
Pf3D7_07_v3	109966	110332	Szt_H3K4_peak_548	21	.	1.49958	3.4713	2.17632	PF3D7_0702600		chitinase, fragment
Pf3D7_07_v3	111260	112294	Szt_H3K4_peak_549	332	.	2.94554	35.4751	33.2668	PF3D7_0702900		centrin, putative
Pf3D7_07_v3	196148	197005	Szt_H3K4_peak_550	24	.	1.5457	3.81727	2.49107	PF3D7_0704300		conserved Plasmodium membrane protein, unknown function
Pf3D7_07_v3	215065	216795	Szt_H3K4_peak_551	299	.	3.03075	32.0699	29.9802	PF3D7_0704600	UT	HECT-type E3 ubiquitin ligase UT
Pf3D7_07_v3	230900	231562	Szt_H3K4_peak_552	21	.	1.53194	3.46137	2.16813	intergenic
Pf3D7_07_v3	242603	243358	Szt_H3K4_peak_553	37	.	1.65006	5.18579	3.76032	PF3D7_0704900	RF2	peptide chain release factor 2
Pf3D7_07_v3	304609	305681	Szt_H3K4_peak_554	37	.	1.69797	5.18833	3.75861	PF3D7_0706300		conserved Plasmodium protein, unknown function
Pf3D7_07_v3	307855	308228	Szt_H3K4_peak_555	29	.	1.58545	4.35363	2.986	intergenic
Pf3D7_07_v3	325888	327000	Szt_H3K4_peak_556	254	.	2.72564	27.5101	25.444	intergenic
Pf3D7_07_v3	327681	328108	Szt_H3K4_peak_557	200	.	2.4719	22.0372	20.063	intergenic
Pf3D7_07_v3	328801	329226	Szt_H3K4_peak_558	137	.	2.16547	15.5554	13.7361	PF3D7_0707200		conserved Plasmodium protein, unknown function
Pf3D7_07_v3	337154	338427	Szt_H3K4_peak_559	175	.	2.52948	19.4562	17.5418	PF3D7_0707300	RAMA	rhoptry-associated membrane antigen
Pf3D7_07_v3	341768	342039	Szt_H3K4_peak_560	11	.	1.37557	2.36141	1.17796	intergenic
Pf3D7_07_v3	355390	355957	Szt_H3K4_peak_561	19	.	1.49376	3.1907	1.92189	PF3D7_0707700		E3 ubiquitin-protein ligase, putative
Pf3D7_07_v3	357431	357711	Szt_H3K4_peak_562	21	.	1.51717	3.48239	2.18761	intergenic
Pf3D7_07_v3	514056	519800	Szt_H3K4_peak_563	65	.	1.78699	8.12222	6.54214	intergenic
Pf3D7_07_v3	529596	532558	Szt_H3K4_peak_564	44	.	1.66342	5.87622	4.42131	intergenic
Pf3D7_07_v3	532984	535336	Szt_H3K4_peak_565	47	.	1.67368	6.20246	4.72431	intergenic
Pf3D7_07_v3	538945	539774	Szt_H3K4_peak_566	29	.	1.60377	4.27182	2.91415	intergenic
Pf3D7_07_v3	540985	541325	Szt_H3K4_peak_567	31	.	1.61529	4.4964	3.12132	intergenic
Pf3D7_07_v3	543035	544062	Szt_H3K4_peak_568	41	.	1.6793	5.55135	4.10298	PF3D7_0712300	VAR	erythrocyte membrane protein 1, PfEMP1
Pf3D7_07_v3	545082	547185	Szt_H3K4_peak_569	43	.	1.67531	5.77314	4.32136	intergenic
Pf3D7_07_v3	547664	550701	Szt_H3K4_peak_570	65	.	1.78591	8.05463	6.53335	intergenic
Pf3D7_07_v3	551340	552114	Szt_H3K4_peak_571	610	.	3.96396	63.4109	61.093	PF3D7_0712400	VAR	erythrocyte membrane protein 1, PfEMP1
Pf3D7_07_v3	554064	559278	Szt_H3K4_peak_572	65	.	1.75581	8.09875	6.59181	intergenic
Pf3D7_07_v3	561586	562178	Szt_H3K4_peak_573	59	.	1.84478	7.5194	5.96075	intergenic
Pf3D7_07_v3	563040	563965	Szt_H3K4_peak_574	40	.	1.70701	5.55104	4.09391	intergenic
Pf3D7_07_v3	565600	565879	Szt_H3K4_peak_575	26	.	1.58524	3.96731	2.62953	PF3D7_0712600	VAR	erythrocyte membrane protein 1, PfEMP1
Pf3D7_07_v3	566725	567875	Szt_H3K4_peak_576	43	.	1.71751	5.78093	4.31713	PF3D7_0712600	VAR	erythrocyte membrane protein 1, PfEMP1
Pf3D7_07_v3	568884	574441	Szt_H3K4_peak_577	53	.	1.73006	6.87355	5.36812	intergenic
Pf3D7_07_v3	583464	585582	Szt_H3K4_peak_578	38	.	1.64298	5.26262	3.8325	intergenic
Pf3D7_07_v3	586266	589101	Szt_H3K4_peak_579	78	.	1.85422	9.47317	7.86573	intergenic
Pf3D7_07_v3	589775	590101	Szt_H3K4_peak_580	209	.	2.73615	23.0025	20.9739	PF3D7_0712900	VAR	erythrocyte membrane protein 1, PfEMP1
Pf3D7_07_v3	592241	597919	Szt_H3K4_peak_581	44	.	1.63648	5.92461	4.47999	intergenic
Pf3D7_07_v3	598563	603250	Szt_H3K4_peak_582	48	.	1.6792	6.36608	4.88191	intergenic
Pf3D7_07_v3	604357	605233	Szt_H3K4_peak_583	18	.	1.48394	3.14821	1.88523	PF3D7_0713100	MC-2TM	Pfmc-2TM Maurer's cleft two transmembrane protein
Pf3D7_07_v3	605848	607229	Szt_H3K4_peak_584	52	.	1.75736	6.73333	5.22264	PF3D7_0713200	EPF1	exported protein family 1
Pf3D7_07_v3	607824	609062	Szt_H3K4_peak_585	40	.	1.71472	5.47076	4.02523	intergenic
Pf3D7_07_v3	625775	626106	Szt_H3K4_peak_586	15	.	1.453	2.82006	1.58841	PF3D7_0713900		conserved Plasmodium protein, unknown function
Pf3D7_07_v3	640502	641680	Szt_H3K4_peak_587	120	.	2.08881	13.7866	12.0821	intergenic
Pf3D7_07_v3	644207	645749	Szt_H3K4_peak_588	179	.	2.5933	19.9451	17.977	intergenic
Pf3D7_07_v3	670629	671037	Szt_H3K4_peak_589	219	.	2.5499	23.9819	21.9307	intergenic
Pf3D7_07_v3	671476	671903	Szt_H3K4_peak_590	206	.	2.3233	22.666	20.653	intergenic
Pf3D7_07_v3	672527	672955	Szt_H3K4_peak_591	479	.	3.41938	50.4007	47.9754	PF3D7_0715000	PNPase	4-nitrophenylphosphatase
Pf3D7_07_v3	754536	755024	Szt_H3K4_peak_592	86	.	2.00976	10.3712	8.69402	PF3D7_0717500	CDPK4	calcium-dependent protein kinase 4
Pf3D7_07_v3	763624	764041	Szt_H3K4_peak_593	69	.	1.85835	8.58483	6.97352	PF3D7_0717700		serine--tRNA ligase, putative
Pf3D7_07_v3	777398	777727	Szt_H3K4_peak_594	22	.	1.48819	3.57068	2.27112	intergenic
Pf3D7_07_v3	806022	806637	Szt_H3K4_peak_595	19	.	1.49094	3.18783	1.92278	intergenic
Pf3D7_07_v3	820214	821619	Szt_H3K4_peak_596	85	.	1.98511	10.2695	8.5866	PF3D7_0718400		ribosomal protein S8, mitochondrial, putative
Pf3D7_07_v3	826194	826806	Szt_H3K4_peak_597	43	.	1.74046	5.79178	4.31787	PF3D7_0718600		conserved Plasmodium protein, unknown function
Pf3D7_07_v3	860269	860525	Szt_H3K4_peak_598	13	.	1.42396	2.50835	1.30631	PF3D7_0719700	RPS10	40S ribosomal protein S10, putative
Pf3D7_07_v3	881793	882512	Szt_H3K4_peak_599	43	.	1.71204	5.79803	4.33298	PF3D7_0720400	AIF	apoptosis-inducing factor, putative
Pf3D7_07_v3	889921	890246	Szt_H3K4_peak_600	41	.	1.73264	5.62441	4.16778	PF3D7_0720700	PX1	phosphoinositide-binding protein PX1
Pf3D7_07_v3	890697	891137	Szt_H3K4_peak_601	69	.	1.94385	8.58546	6.9816	intergenic
Pf3D7_07_v3	897080	897396	Szt_H3K4_peak_602	51	.	1.69004	6.6978	5.1825	intergenic
Pf3D7_07_v3	934010	934347	Szt_H3K4_peak_603	25	.	1.51782	3.92031	2.58705	PF3D7_0721700	PSOP1	secreted ookinete protein, putative
Pf3D7_07_v3	945625	946088	Szt_H3K4_peak_604	227	.	2.67989	24.7703	22.7385	PF3D7_0722200	RALP1	rhoptry-associated leucine zipper-like protein 1
Pf3D7_07_v3	974873	975411	Szt_H3K4_peak_605	80	.	2.03623	9.68664	8.01091	PF3D7_0723300		conserved protein, unknown function
Pf3D7_07_v3	1000091	1001104	Szt_H3K4_peak_606	73	.	1.90409	8.92811	7.33123	PF3D7_0723900		RNA-binding protein, putative
Pf3D7_07_v3	1050502	1051099	Szt_H3K4_peak_607	31	.	1.60378	4.51593	3.13298	intergenic
Pf3D7_07_v3	1075437	1078307	Szt_H3K4_peak_608	168	.	2.36584	18.7103	16.8436	intergenic
Pf3D7_07_v3	1078828	1080054	Szt_H3K4_peak_609	53	.	1.79208	6.82643	5.32862	PF3D7_0725400		conserved Plasmodium protein, unknown function
Pf3D7_07_v3	1082019	1083425	Szt_H3K4_peak_610	183	.	2.38857	20.2136	18.3194	intergenic
Pf3D7_07_v3	1085706	1086336	Szt_H3K4_peak_611	263	.	3.05353	28.5709	26.367	intergenic
Pf3D7_07_v3	1090417	1094074	Szt_H3K4_peak_612	136	.	2.22918	15.5813	13.6959	PF3D7_0726050		conserved Plasmodium protein, unknown function
Pf3D7_07_v3	1107460	1108300	Szt_H3K4_peak_613	556	.	3.39869	58.0726	55.6711	PF3D7_0726400		conserved Plasmodium membrane protein, unknown function
Pf3D7_07_v3	1182450	1182732	Szt_H3K4_peak_614	21	.	1.49172	3.49236	2.19652	intergenic
Pf3D7_07_v3	1262912	1263455	Szt_H3K4_peak_615	30	.	1.59918	4.46221	3.09414	PF3D7_0729800		dynein light chain, putative
Pf3D7_07_v3	1291032	1291622	Szt_H3K4_peak_616	20	.	1.51623	3.31058	2.02838	intergenic
Pf3D7_07_v3	1292231	1293075	Szt_H3K4_peak_617	32	.	1.6373	4.6035	3.2163	intergenic
Pf3D7_07_v3	1293589	1294048	Szt_H3K4_peak_618	148	.	2.44857	16.8018	14.8894	intergenic
Pf3D7_07_v3	1294893	1295254	Szt_H3K4_peak_619	76	.	2.00394	9.29369	7.64393	intergenic
Pf3D7_07_v3	1303124	1303918	Szt_H3K4_peak_620	14	.	1.41418	2.643	1.42939	PF3D7_0730400	IMP2	IMP1-like protein, putative
Pf3D7_07_v3	1317942	1318313	Szt_H3K4_peak_621	190	.	2.29937	21.0687	19.0857	intergenic
Pf3D7_07_v3	1318822	1319238	Szt_H3K4_peak_622	307	.	2.99261	32.9513	30.7508	intergenic
Pf3D7_07_v3	1335306	1335556	Szt_H3K4_peak_623	38	.	1.71082	5.25591	3.81619	intergenic
Pf3D7_07_v3	1336105	1336468	Szt_H3K4_peak_624	18	.	1.49868	3.16191	1.89554	PF3D7_0731100	PTP2	EMP1-trafficking protein
Pf3D7_07_v3	1344651	1345458	Szt_H3K4_peak_625	88	.	2.07054	10.5113	8.82451	intergenic
Pf3D7_07_v3	1348268	1348722	Szt_H3K4_peak_626	54	.	1.78706	7.00382	5.46766	PF3D7_0731300	PfG174	Plasmodium exported protein (PHISTb), unknown function
Pf3D7_07_v3	1355579	1357393	Szt_H3K4_peak_627	53	.	1.78356	6.84584	5.34126	PF3D7_0731500	EBA175	erythrocyte binding antigen-175
Pf3D7_07_v3	1380107	1380556	Szt_H3K4_peak_628	12	.	1.38605	2.46788	1.27288	intergenic
Pf3D7_07_v3	1382498	1383443	Szt_H3K4_peak_629	29	.	1.55284	4.29798	2.93305	intergenic
Pf3D7_07_v3	1386264	1386569	Szt_H3K4_peak_630	71	.	1.96779	8.74835	7.11896	PF3D7_0732000		stevor
Pf3D7_07_v3	1391204	1392043	Szt_H3K4_peak_631	41	.	1.65513	5.64918	4.19109	PF3D7_0732200	RIF	rifin
Pf3D7_07_v3	1392541	1394240	Szt_H3K4_peak_632	51	.	1.77867	6.62798	5.113	intergenic
Pf3D7_07_v3	1395563	1398290	Szt_H3K4_peak_633	53	.	1.74785	6.92478	5.39072	PF3D7_0732300	RIF	rifin
Pf3D7_07_v3	1399432	1403353	Szt_H3K4_peak_634	32	.	1.57526	4.62264	3.23875	intergenic
Pf3D7_07_v3	1403963	1404331	Szt_H3K4_peak_635	11	.	1.40421	2.34741	1.1631	intergenic
Pf3D7_07_v3	1405115	1405502	Szt_H3K4_peak_636	52	.	1.82458	6.74685	5.22212	intergenic
Pf3D7_07_v3	1414969	1415632	Szt_H3K4_peak_637	50	.	1.71983	6.5391	5.05005	PF3D7_0732900	RIF	rifin
Pf3D7_07_v3	1419774	1426410	Szt_H3K4_peak_638	93	.	1.98132	11.0154	9.32293	intergenic
Pf3D7_07_v3	1427089	1429180	Szt_H3K4_peak_639	518	.	3.57571	54.1307	51.8245	intergenic
Pf3D7_07_v3	1430332	1432133	Szt_H3K4_peak_640	28	.	1.5985	4.20501	2.85227	intergenic
Pf3D7_07_v3	1434333	1438143	Szt_H3K4_peak_641	505	.	3.79684	53.007	50.5549	intergenic
Pf3D7_07_v3	1442384	1442778	Szt_H3K4_peak_642	129	.	2.33822	14.7824	12.9329	intergenic
Pf3D7_07_v3	1444541	1444797	Szt_H3K4_peak_643	84	.	2.07102	10.1759	8.47598	intergenic
Pf3D7_08_v3	5735	6968	Szt_H3K4_peak_644	536	.	3.95094	56.0777	53.636	intergenic
Pf3D7_08_v3	7457	9496	Szt_H3K4_peak_645	573	.	3.95054	59.765	57.3556	intergenic
Pf3D7_08_v3	10099	11160	Szt_H3K4_peak_646	33	.	1.65196	4.75642	3.36331	intergenic
Pf3D7_08_v3	11695	12216	Szt_H3K4_peak_647	14	.	1.43702	2.70256	1.48221	intergenic
Pf3D7_08_v3	17930	20557	Szt_H3K4_peak_648	739	.	4.51015	76.5802	73.9788	intergenic
Pf3D7_08_v3	21163	25312	Szt_H3K4_peak_649	112	.	2.01587	12.9508	11.2282	intergenic
Pf3D7_08_v3	33915	39233	Szt_H3K4_peak_650	54	.	1.73472	6.93523	5.41839	intergenic
Pf3D7_08_v3	40798	48666	Szt_H3K4_peak_651	47	.	1.70012	6.27006	4.78858	intergenic
Pf3D7_08_v3	52827	53092	Szt_H3K4_peak_652	58	.	1.86856	7.44065	5.86387	PF3D7_0800400	RIF	rifin
Pf3D7_08_v3	56396	57671	Szt_H3K4_peak_653	70	.	1.86235	8.65028	7.01588	PF3D7_0800500	RIF	rifin
Pf3D7_08_v3	76403	77902	Szt_H3K4_peak_654	20	.	1.50524	3.28173	2.00527	intergenic
Pf3D7_08_v3	78427	78841	Szt_H3K4_peak_655	36	.	1.69382	5.09299	3.6674	PF3D7_0800800		Plasmodium exported protein (hyp7), unknown function
Pf3D7_08_v3	80027	81695	Szt_H3K4_peak_656	37	.	1.70237	5.20373	3.77157	intergenic
Pf3D7_08_v3	82499	83891	Szt_H3K4_peak_657	34	.	1.61837	4.87602	3.47329	PF3D7_0801000		Plasmodium exported protein (PHISTc)
Pf3D7_08_v3	91393	92128	Szt_H3K4_peak_658	18	.	1.40939	3.08215	1.82435	intergenic
Pf3D7_08_v3	92996	94900	Szt_H3K4_peak_659	33	.	1.55578	4.78954	3.39161	intergenic
Pf3D7_08_v3	96147	99761	Szt_H3K4_peak_660	92	.	1.86423	10.9343	9.2518	intergenic
Pf3D7_08_v3	124283	124633	Szt_H3K4_peak_661	55	.	1.84758	7.0752	5.53445	intergenic
Pf3D7_08_v3	126418	126748	Szt_H3K4_peak_662	28	.	1.60915	4.16336	2.80464	PF3D7_0801900	LSD2	lysine-specific histone demethylase, putative
Pf3D7_08_v3	142655	142905	Szt_H3K4_peak_663	36	.	1.63424	5.11719	3.69777	intergenic
Pf3D7_08_v3	144605	144968	Szt_H3K4_peak_664	17	.	1.44547	2.98435	1.73468	PF3D7_0802000	GDH3	glutamate dehydrogenase, putative
Pf3D7_08_v3	162496	164460	Szt_H3K4_peak_665	65	.	1.91479	8.16958	6.58675	intergenic
Pf3D7_08_v3	179747	180078	Szt_H3K4_peak_666	44	.	1.68802	5.95972	4.49016	PF3D7_0802600	ACbeta	adenylyl cyclase beta
Pf3D7_08_v3	191004	191666	Szt_H3K4_peak_667	39	.	1.6723	5.36415	3.93684	PF3D7_0802800	CNA	serine/threonine protein phosphatase 2B catalytic subunit A
Pf3D7_08_v3	207483	208154	Szt_H3K4_peak_668	21	.	1.53737	3.49625	2.19775	PF3D7_0803300	MORG1	mitogen-activated protein kinase organizer 1, putative
Pf3D7_08_v3	216623	216994	Szt_H3K4_peak_669	62	.	1.7968	7.87571	6.29368	PF3D7_0803500		AAA family ATPase, putative
Pf3D7_08_v3	274636	274944	Szt_H3K4_peak_670	33	.	1.6324	4.76524	3.36645	intergenic
Pf3D7_08_v3	283407	283656	Szt_H3K4_peak_671	21	.	1.46111	3.46234	2.16754	intergenic
Pf3D7_08_v3	285422	285661	Szt_H3K4_peak_672	21	.	1.51922	3.46856	2.17744	PF3D7_0805100		conserved protein, unknown function
Pf3D7_08_v3	286233	286640	Szt_H3K4_peak_673	46	.	1.76684	6.18174	4.69678	PF3D7_0805100		conserved protein, unknown function
Pf3D7_08_v3	290854	291139	Szt_H3K4_peak_674	42	.	1.67129	5.72922	4.27096	PF3D7_0805200	GAMER	gamete release protein, putative
Pf3D7_08_v3	291565	292178	Szt_H3K4_peak_675	31	.	1.57327	4.51853	3.15753	intergenic
Pf3D7_08_v3	295430	295885	Szt_H3K4_peak_676	12	.	1.38041	2.4738	1.27746	intergenic
Pf3D7_08_v3	296883	298655	Szt_H3K4_peak_677	115	.	2.19562	13.317	11.5365	intergenic
Pf3D7_08_v3	302199	302504	Szt_H3K4_peak_678	11	.	1.37176	2.32112	1.14229	PF3D7_0805400		N-acetyltransferase, GNAT family, putative
Pf3D7_08_v3	303225	304589	Szt_H3K4_peak_679	47	.	1.74993	6.19961	4.72762	PF3D7_0805400		N-acetyltransferase, GNAT family, putative	PF3D7_0805500		conserved Plasmodium protein, unknown function
Pf3D7_08_v3	309732	311522	Szt_H3K4_peak_680	239	.	2.52784	25.8248	23.9961	PF3D7_0805600	PAP2	phosphatidic acid phosphatase 2
Pf3D7_08_v3	321059	321824	Szt_H3K4_peak_681	75	.	1.96196	9.17251	7.56956	PF3D7_0805800		conserved Plasmodium protein, unknown function
Pf3D7_08_v3	333363	333910	Szt_H3K4_peak_682	16	.	1.43327	2.88623	1.64722	PF3D7_0806200	DPY19	Dpy-19-like C-mannosyltransferase
Pf3D7_08_v3	367460	368155	Szt_H3K4_peak_683	36	.	1.63151	5.00917	3.60503	PF3D7_0807000		YEATS domain-containing protein, putative	PF3D7_0806900		conserved protein, unknown function
Pf3D7_08_v3	382081	383089	Szt_H3K4_peak_684	69	.	1.86368	8.57613	6.97971	PF3D7_0807400	COQ10	coenzyme Q-binding protein COQ10 homolog, mitochondrial
Pf3D7_08_v3	398806	399377	Szt_H3K4_peak_685	24	.	1.53776	3.7436	2.42689	PF3D7_0807800	RPN10	26S proteasome regulatory subunit RPN10, putative
Pf3D7_08_v3	418344	418637	Szt_H3K4_peak_686	17	.	1.44915	3.03641	1.78205	intergenic
Pf3D7_08_v3	419388	420783	Szt_H3K4_peak_687	48	.	1.77554	6.34942	4.86204	PF3D7_0808300		ubiquitin regulatory protein, putative
Pf3D7_08_v3	427618	436759	Szt_H3K4_peak_688	46	.	1.6603	6.09763	4.62945	intergenic
Pf3D7_08_v3	437976	438575	Szt_H3K4_peak_689	21	.	1.53149	3.456	2.16276	intergenic
Pf3D7_08_v3	440197	444547	Szt_H3K4_peak_690	72	.	1.77972	8.81998	7.25034	intergenic
Pf3D7_08_v3	445110	445888	Szt_H3K4_peak_691	55	.	1.70556	7.04094	5.52562	intergenic
Pf3D7_08_v3	447508	448155	Szt_H3K4_peak_692	65	.	1.90479	8.17894	6.56706	intergenic
Pf3D7_08_v3	450856	454577	Szt_H3K4_peak_693	65	.	1.8175	8.14556	6.55665	intergenic
Pf3D7_08_v3	455451	456019	Szt_H3K4_peak_694	17	.	1.43584	3.01488	1.76343	intergenic
Pf3D7_08_v3	457688	458369	Szt_H3K4_peak_695	78	.	1.94203	9.51966	7.85118	intergenic
Pf3D7_08_v3	459069	461887	Szt_H3K4_peak_696	51	.	1.68291	6.68436	5.18473	intergenic
Pf3D7_08_v3	505055	505391	Szt_H3K4_peak_697	80	.	1.92509	9.66769	8.00069	intergenic
Pf3D7_08_v3	506634	507539	Szt_H3K4_peak_698	110	.	2.08708	12.8188	11.0892	PF3D7_0809900	JmjC1	JmjC domain-containing protein 1, putative
Pf3D7_08_v3	552813	553565	Szt_H3K4_peak_699	84	.	2.00478	10.1939	8.48091	PF3D7_0811000	CUL1	cullin-1, putative
Pf3D7_08_v3	588816	589380	Szt_H3K4_peak_700	53	.	1.76023	6.87046	5.36567	PF3D7_0811700		conserved Plasmodium protein, unknown function
Pf3D7_08_v3	589816	590385	Szt_H3K4_peak_701	347	.	3.08886	36.9989	34.7765	intergenic
Pf3D7_08_v3	620540	620969	Szt_H3K4_peak_702	178	.	2.56168	19.8039	17.8451	PF3D7_0812400	KARalpha	karyopherin alpha
Pf3D7_08_v3	625063	625328	Szt_H3K4_peak_703	27	.	1.59219	4.06431	2.7215	PF3D7_0812500		RNA-binding protein, putative
Pf3D7_08_v3	646447	646926	Szt_H3K4_peak_704	27	.	1.58475	4.13987	2.79835	PF3D7_0813100		conserved Plasmodium protein, unknown function
Pf3D7_08_v3	649508	650684	Szt_H3K4_peak_705	164	.	2.43274	18.2836	16.446	PF3D7_0813200		CS domain protein, putative
Pf3D7_08_v3	667896	668168	Szt_H3K4_peak_706	46	.	1.76478	6.15544	4.676	PF3D7_0813600		translation initiation factor SUI1, putative
Pf3D7_08_v3	672588	672910	Szt_H3K4_peak_707	31	.	1.50072	4.50625	3.12841	intergenic
Pf3D7_08_v3	684283	684599	Szt_H3K4_peak_708	26	.	1.5643	4.0127	2.67154	PF3D7_0814200	ALBA1	DNA/RNA-binding protein Alba 1
Pf3D7_08_v3	685044	685284	Szt_H3K4_peak_709	32	.	1.65565	4.65114	3.25515	PF3D7_0814200	ALBA1	DNA/RNA-binding protein Alba 1
Pf3D7_08_v3	741652	741980	Szt_H3K4_peak_710	50	.	1.76246	6.58393	5.06779	intergenic
Pf3D7_08_v3	794330	794610	Szt_H3K4_peak_711	32	.	1.65065	4.64755	3.25683	PF3D7_0817400		phosphatase, putative
Pf3D7_08_v3	804448	805336	Szt_H3K4_peak_712	30	.	1.6244	4.42089	3.05271	PF3D7_0817700	RON5	rhoptry neck protein 5
Pf3D7_08_v3	813913	814254	Szt_H3K4_peak_713	63	.	1.91672	7.94261	6.34961	PF3D7_0817800	C3AP3	respiratory chain complex 3 associated protein 3
Pf3D7_08_v3	816027	816299	Szt_H3K4_peak_714	13	.	1.40169	2.55933	1.35439	PF3D7_0817900	HMGB2	high mobility group protein B2
Pf3D7_08_v3	822805	823948	Szt_H3K4_peak_715	216	.	2.72095	23.605	21.6107	PF3D7_0818100		zinc finger protein, putative
Pf3D7_08_v3	827613	827882	Szt_H3K4_peak_716	21	.	1.52929	3.3998	2.10749	PF3D7_0818200	14-3-3I	14-3-3 protein
Pf3D7_08_v3	828450	828744	Szt_H3K4_peak_717	16	.	1.46789	2.86476	1.62487	PF3D7_0818200	14-3-3I	14-3-3 protein
Pf3D7_08_v3	832569	832851	Szt_H3K4_peak_718	57	.	1.85102	7.31798	5.75753	PF3D7_0818300		dynactin subunit 6, putative
Pf3D7_08_v3	858322	859501	Szt_H3K4_peak_719	90	.	1.94974	10.6422	9.02376	PF3D7_0818900	HSP70	heat shock protein 70
Pf3D7_08_v3	886985	887227	Szt_H3K4_peak_720	33	.	1.66519	4.76393	3.3606	intergenic
Pf3D7_08_v3	887856	888367	Szt_H3K4_peak_721	18	.	1.48878	3.11872	1.85544	PF3D7_0819700		conserved Plasmodium protein, unknown function
Pf3D7_08_v3	915509	916189	Szt_H3K4_peak_722	49	.	1.78654	6.46262	4.96091	intergenic
Pf3D7_08_v3	946688	947195	Szt_H3K4_peak_723	15	.	1.45149	2.72859	1.50278	intergenic
Pf3D7_08_v3	962475	964249	Szt_H3K4_peak_724	115	.	2.21993	13.3548	11.5955	PF3D7_0821400		conserved Plasmodium protein, unknown function
Pf3D7_08_v3	994612	994948	Szt_H3K4_peak_725	14	.	1.44442	2.67431	1.45497	intergenic
Pf3D7_08_v3	1011141	1011435	Szt_H3K4_peak_726	16	.	1.45477	2.92908	1.68553	intergenic
Pf3D7_08_v3	1011938	1013165	Szt_H3K4_peak_727	330	.	3.14037	35.1643	33.0093	PF3D7_0823000	VPS15	serine/threonine protein kinase VPS15, putative
Pf3D7_08_v3	1026595	1026864	Szt_H3K4_peak_728	21	.	1.52248	3.41799	2.12762	intergenic
Pf3D7_08_v3	1144519	1145197	Szt_H3K4_peak_729	15	.	1.4478	2.78541	1.55611	PF3D7_0826300		SPRY domain, putative
Pf3D7_08_v3	1232139	1232436	Szt_H3K4_peak_730	15	.	1.46435	2.83159	1.59466	PF3D7_0828700		conserved protein, unknown function
Pf3D7_08_v3	1240559	1241408	Szt_H3K4_peak_731	141	.	2.41395	16.0727	14.1757	PF3D7_0828900		conserved protein, unknown function
Pf3D7_08_v3	1243030	1244150	Szt_H3K4_peak_732	74	.	1.9221	9.00205	7.43325	PF3D7_0829000		conserved Plasmodium membrane protein, unknown function
Pf3D7_08_v3	1260017	1260701	Szt_H3K4_peak_733	78	.	1.94219	9.40521	7.80524	PF3D7_0829500		conserved Plasmodium protein, unknown function
Pf3D7_08_v3	1267506	1268426	Szt_H3K4_peak_734	70	.	1.893	8.65481	7.05659	PF3D7_0829600	ETRAMP8	early transcribed membrane protein 8
Pf3D7_08_v3	1277684	1277973	Szt_H3K4_peak_735	95	.	2.13125	11.2921	9.56165	intergenic
Pf3D7_08_v3	1291884	1292345	Szt_H3K4_peak_736	48	.	1.79635	6.3347	4.83025	intergenic
Pf3D7_08_v3	1293186	1293674	Szt_H3K4_peak_737	142	.	2.39364	16.1311	14.2402	PF3D7_0830400		CRA domain-containing protein, putative
Pf3D7_08_v3	1299520	1299783	Szt_H3K4_peak_738	87	.	2.09599	10.4739	8.75532	intergenic
Pf3D7_08_v3	1356919	1357807	Szt_H3K4_peak_739	141	.	2.26183	15.9043	14.1857	PF3D7_0831600	CLAG8	cytoadherence linked asexual protein 8
Pf3D7_08_v3	1369486	1369835	Szt_H3K4_peak_740	48	.	1.71883	6.39672	4.89816	intergenic
Pf3D7_08_v3	1378032	1378357	Szt_H3K4_peak_741	62	.	1.90587	7.8729	6.29003	intergenic
Pf3D7_08_v3	1380446	1380928	Szt_H3K4_peak_742	23	.	1.5564	3.70904	2.39578	intergenic
Pf3D7_08_v3	1382174	1382771	Szt_H3K4_peak_743	38	.	1.68314	5.32751	3.89885	PF3D7_0832000		stevor
Pf3D7_08_v3	1383234	1384505	Szt_H3K4_peak_744	22	.	1.50583	3.49756	2.20171	PF3D7_0832000		stevor
Pf3D7_08_v3	1385380	1388499	Szt_H3K4_peak_745	25	.	1.52454	3.84527	2.52088	intergenic
Pf3D7_08_v3	1393473	1394512	Szt_H3K4_peak_746	32	.	1.61721	4.66879	3.2892	intergenic
Pf3D7_08_v3	1395421	1396480	Szt_H3K4_peak_747	27	.	1.59811	4.07915	2.72998	intergenic
Pf3D7_08_v3	1397023	1398993	Szt_H3K4_peak_748	44	.	1.67731	5.87505	4.42507	PF3D7_0832300		Plasmodium exported protein (PHISTa-like), unknown function
Pf3D7_08_v3	1399533	1400195	Szt_H3K4_peak_749	45	.	1.6006	5.9767	4.51633	PF3D7_0832400		stevor
Pf3D7_08_v3	1400607	1403321	Szt_H3K4_peak_750	34	.	1.58936	4.80744	3.40964	PF3D7_0832500	RIF	rifin
Pf3D7_08_v3	1403741	1409626	Szt_H3K4_peak_751	31	.	1.58987	4.57143	3.19132	PF3D7_0832600		stevor
Pf3D7_08_v3	1411131	1412146	Szt_H3K4_peak_752	40	.	1.64028	5.53121	4.07929	PF3D7_0832800	RIF	rifin
Pf3D7_08_v3	1414389	1415365	Szt_H3K4_peak_753	53	.	1.76151	6.83926	5.32509	PF3D7_0832900		stevor
Pf3D7_08_v3	1417805	1418540	Szt_H3K4_peak_754	50	.	1.69653	6.54647	5.04647	PF3D7_0833000	RIF	rifin
Pf3D7_08_v3	1422268	1422591	Szt_H3K4_peak_755	45	.	1.76055	5.97682	4.5018	intergenic
Pf3D7_08_v3	1427607	1428006	Szt_H3K4_peak_756	56	.	1.83736	7.20698	5.65623	PF3D7_0833200	RIF	rifin
Pf3D7_08_v3	1429201	1429493	Szt_H3K4_peak_757	36	.	1.68147	5.03677	3.62299	intergenic
Pf3D7_08_v3	1433130	1433876	Szt_H3K4_peak_758	37	.	1.66191	5.22033	3.79262	PF3D7_0833400	RIF	rifin
Pf3D7_08_v3	1437931	1443671	Szt_H3K4_peak_759	111	.	1.98757	12.8461	11.1765	intergenic
Pf3D7_08_v3	1444209	1444806	Szt_H3K4_peak_760	1053	.	5.53394	108.277	105.33	intergenic
Pf3D7_08_v3	1445490	1447641	Szt_H3K4_peak_761	538	.	3.83224	56.1931	53.8138	intergenic
Pf3D7_08_v3	1461477	1463543	Szt_H3K4_peak_762	323	.	3.2252	34.6192	32.3916	intergenic
Pf3D7_09_v3	6685	10567	Szt_H3K4_peak_763	368	.	3.02368	39.0136	36.8872	intergenic
Pf3D7_09_v3	14060	14382	Szt_H3K4_peak_764	34	.	1.5482	4.85222	3.45206	intergenic
Pf3D7_09_v3	15531	15967	Szt_H3K4_peak_765	25	.	1.54003	3.88701	2.55734	intergenic
Pf3D7_09_v3	17068	17973	Szt_H3K4_peak_766	908	.	5.28171	93.7173	90.8369	intergenic
Pf3D7_09_v3	18724	19288	Szt_H3K4_peak_767	784	.	4.73029	81.0907	78.4327	intergenic
Pf3D7_09_v3	19869	25555	Szt_H3K4_peak_768	120	.	2.10855	13.8452	12.0861	intergenic
Pf3D7_09_v3	29874	30555	Szt_H3K4_peak_769	29	.	1.55714	4.3467	2.98528	PF3D7_0900200	RIF	rifin
Pf3D7_09_v3	33604	34222	Szt_H3K4_peak_770	58	.	1.78552	7.43572	5.87369	PF3D7_0900300	RIF	rifin
Pf3D7_09_v3	43032	43526	Szt_H3K4_peak_771	36	.	1.6269	5.08332	3.66241	PF3D7_0900500	RIF	rifin
Pf3D7_09_v3	46080	46869	Szt_H3K4_peak_772	27	.	1.53328	4.09695	2.75139	PF3D7_0900600	RIF	rifin
Pf3D7_09_v3	49670	50307	Szt_H3K4_peak_773	50	.	1.73543	6.53054	5.00886	PF3D7_0900700	RIF	rifin
Pf3D7_09_v3	55159	55591	Szt_H3K4_peak_774	59	.	1.78522	7.54375	5.99207	PF3D7_0900900		stevor
Pf3D7_09_v3	59256	59757	Szt_H3K4_peak_775	55	.	1.81506	7.0324	5.51396	intergenic
Pf3D7_09_v3	67831	68576	Szt_H3K4_peak_776	28	.	1.51433	4.17763	2.82337	PF3D7_0901300	RIF	rifin
Pf3D7_09_v3	70801	73422	Szt_H3K4_peak_777	50	.	1.76333	6.59463	5.09439	intergenic
Pf3D7_09_v3	74765	75749	Szt_H3K4_peak_778	77	.	1.85804	9.42958	7.76572	PF3D7_0901500	RIF	rifin
Pf3D7_09_v3	76176	77160	Szt_H3K4_peak_779	27	.	1.58506	4.12796	2.78019	intergenic
Pf3D7_09_v3	95702	96100	Szt_H3K4_peak_780	65	.	1.8999	8.08439	6.50219	intergenic
Pf3D7_09_v3	111953	112329	Szt_H3K4_peak_781	91	.	2.08305	10.8598	9.13533	intergenic
Pf3D7_09_v3	136274	136816	Szt_H3K4_peak_782	116	.	2.20644	13.3941	11.6238	intergenic
Pf3D7_09_v3	137279	137750	Szt_H3K4_peak_783	43	.	1.69095	5.85645	4.39765	intergenic
Pf3D7_09_v3	167401	168233	Szt_H3K4_peak_784	113	.	2.17915	13.1981	11.3885	PF3D7_0903600		conserved protein, unknown function
Pf3D7_09_v3	174518	174823	Szt_H3K4_peak_785	47	.	1.79262	6.29722	4.79572	PF3D7_0903700		alpha tubulin 1
Pf3D7_09_v3	214599	215130	Szt_H3K4_peak_786	184	.	2.44557	20.419	18.4705	intergenic
Pf3D7_09_v3	233594	233941	Szt_H3K4_peak_787	36	.	1.67108	5.05469	3.6368	PF3D7_0905000	ATPTG4	ATP synthase-associated protein, putative
Pf3D7_09_v3	252317	252563	Szt_H3K4_peak_788	21	.	1.42883	3.47584	2.17798	intergenic
Pf3D7_09_v3	270818	271079	Szt_H3K4_peak_789	16	.	1.42811	2.9433	1.69774	PF3D7_0905400	RhopH3	high molecular weight rhoptry protein 3
Pf3D7_09_v3	274441	276682	Szt_H3K4_peak_790	244	.	2.75507	26.4148	24.4653	PF3D7_0905500		conserved protein, unknown function
Pf3D7_09_v3	277104	278506	Szt_H3K4_peak_791	75	.	1.92897	9.13219	7.55233	intergenic
Pf3D7_09_v3	328359	328600	Szt_H3K4_peak_792	33	.	1.6569	4.73584	3.33893	PF3D7_0906700	LRR9	leucine-rich repeat protein
Pf3D7_09_v3	329019	329748	Szt_H3K4_peak_793	342	.	3.26905	36.4468	34.2371	PF3D7_0906700	LRR9	leucine-rich repeat protein
Pf3D7_09_v3	343483	344706	Szt_H3K4_peak_794	35	.	1.65379	5.00023	3.59639	PF3D7_0907200		GTPase-activating protein, putative
Pf3D7_09_v3	356032	356502	Szt_H3K4_peak_795	109	.	2.21144	12.6883	10.9091	PF3D7_0907500		conserved protein, unknown function
Pf3D7_09_v3	358447	359058	Szt_H3K4_peak_796	30	.	1.62088	4.40102	3.036	PF3D7_0907600		translation initiation factor SUI1, putative
Pf3D7_09_v3	372802	373869	Szt_H3K4_peak_797	306	.	3.17217	32.8452	30.6378	PF3D7_0908100		apicoplast integral membrane protein, putative
Pf3D7_09_v3	387952	388207	Szt_H3K4_peak_798	17	.	1.48121	2.98616	1.73504	PF3D7_0908400		conserved Plasmodium protein, unknown function	PF3D7_0908500		conserved Plasmodium protein, unknown function
Pf3D7_09_v3	397865	398592	Szt_H3K4_peak_799	374	.	3.29363	39.7205	37.462	PF3D7_0908600		ribosomal RNA methyltransferase, putative
Pf3D7_09_v3	439438	439935	Szt_H3K4_peak_800	83	.	2.07757	10.0811	8.37029	intergenic
Pf3D7_09_v3	502526	504762	Szt_H3K4_peak_801	95	.	2.0481	11.1478	9.5098	PF3D7_0911100		START domain-containing protein, putative
Pf3D7_09_v3	510832	511172	Szt_H3K4_peak_802	38	.	1.63917	5.24133	3.8184	PF3D7_0911300	CRMP1	cysteine repeat modular protein 1
Pf3D7_09_v3	530597	531102	Szt_H3K4_peak_803	73	.	1.8925	9.00967	7.38427	intergenic
Pf3D7_09_v3	536652	537283	Szt_H3K4_peak_804	25	.	1.55447	3.82261	2.50244	PF3D7_0911900	ICP	falstatin
Pf3D7_09_v3	540236	540805	Szt_H3K4_peak_805	175	.	2.52953	19.5585	17.591	PF3D7_0912000		conserved Plasmodium protein, unknown function
Pf3D7_09_v3	554461	554842	Szt_H3K4_peak_806	44	.	1.76309	5.94167	4.46308	intergenic
Pf3D7_09_v3	592219	592870	Szt_H3K4_peak_807	39	.	1.71685	5.3696	3.92622	PF3D7_0913800		conserved Plasmodium protein, unknown function
Pf3D7_09_v3	593359	594454	Szt_H3K4_peak_808	17	.	1.46155	2.9505	1.70323	PF3D7_0913900	RRSapi	arginine--tRNA ligase, putative
Pf3D7_09_v3	605827	606424	Szt_H3K4_peak_809	164	.	2.46875	18.2814	16.4039	intergenic
Pf3D7_09_v3	611458	611751	Szt_H3K4_peak_810	41	.	1.73608	5.62624	4.16847	intergenic
Pf3D7_09_v3	616083	617703	Szt_H3K4_peak_811	267	.	2.8017	28.7029	26.7289	PF3D7_0914400	KIC3	protein KIC3
Pf3D7_09_v3	629327	629576	Szt_H3K4_peak_812	26	.	1.58558	3.96185	2.62348	PF3D7_0914700	MFR4	major facilitator superfamily-related transporter, putative
Pf3D7_09_v3	672211	673752	Szt_H3K4_peak_813	38	.	1.66759	5.2267	3.80643	PF3D7_0916100	TRX3	thioredoxin 3
Pf3D7_09_v3	700338	701613	Szt_H3K4_peak_814	285	.	2.89923	30.6297	28.5733	intergenic
Pf3D7_09_v3	715650	716095	Szt_H3K4_peak_815	38	.	1.67401	5.33933	3.89572	PF3D7_0917200		conserved protein, unknown function
Pf3D7_09_v3	717157	718181	Szt_H3K4_peak_816	110	.	2.07803	12.7593	11.0511	PF3D7_0917300		conserved protein, unknown function
Pf3D7_09_v3	736518	737172	Szt_H3K4_peak_817	83	.	2.0659	10.057	8.36117	PF3D7_0917900	BIP	heat shock protein 70
Pf3D7_09_v3	741218	741457	Szt_H3K4_peak_818	15	.	1.45038	2.83264	1.59886	PF3D7_0918000	GAP50	glideosome-associated protein 50
Pf3D7_09_v3	744601	746184	Szt_H3K4_peak_819	151	.	2.32669	16.8897	15.1289	intergenic
Pf3D7_09_v3	746624	747121	Szt_H3K4_peak_820	103	.	2.13855	12.0281	10.3189	PF3D7_0918100		cytochrome b5-like heme/steroid binding protein, putative
Pf3D7_09_v3	754569	755027	Szt_H3K4_peak_821	86	.	1.95836	10.3431	8.64576	PF3D7_0918400		conserved Plasmodium protein, unknown function
Pf3D7_09_v3	768836	769090	Szt_H3K4_peak_822	15	.	1.44634	2.78613	1.55865	PF3D7_0918700		conserved Plasmodium protein, unknown function
Pf3D7_09_v3	776490	776778	Szt_H3K4_peak_823	41	.	1.70147	5.55516	4.10983	intergenic
Pf3D7_09_v3	790551	791687	Szt_H3K4_peak_824	170	.	2.40683	18.8658	17.0779	intergenic
Pf3D7_09_v3	814640	815028	Szt_H3K4_peak_825	79	.	1.9986	9.60124	7.93969	intergenic
Pf3D7_09_v3	820936	821492	Szt_H3K4_peak_826	133	.	2.31506	15.172	13.3268	intergenic
Pf3D7_09_v3	821987	822236	Szt_H3K4_peak_827	22	.	1.54594	3.5523	2.24705	PF3D7_0920000	ELO3	elongation of fatty acids protein, putative
Pf3D7_09_v3	840063	840786	Szt_H3K4_peak_828	21	.	1.52314	3.46203	2.16786	PF3D7_0920500		ADP-ribosylation factor, putative
Pf3D7_09_v3	853607	854051	Szt_H3K4_peak_829	44	.	1.6083	5.93716	4.46178	intergenic
Pf3D7_09_v3	901500	902514	Szt_H3K4_peak_830	25	.	1.56163	3.83674	2.51286	PF3D7_0922200	SAMS	S-adenosylmethionine synthetase
Pf3D7_09_v3	976730	976975	Szt_H3K4_peak_831	22	.	1.51671	3.58549	2.2832	PF3D7_0924100		conserved Plasmodium protein, unknown function
Pf3D7_09_v3	986309	987654	Szt_H3K4_peak_832	45	.	1.7361	5.99608	4.53552	PF3D7_0924400		conserved Plasmodium protein, unknown function
Pf3D7_09_v3	988068	988357	Szt_H3K4_peak_833	30	.	1.62885	4.40141	3.02895	PF3D7_0924400		conserved Plasmodium protein, unknown function
Pf3D7_09_v3	998268	998566	Szt_H3K4_peak_834	45	.	1.72272	6.01156	4.52656	PF3D7_0924600		conserved Plasmodium protein, unknown function
Pf3D7_09_v3	1038949	1040144	Szt_H3K4_peak_835	75	.	1.90578	9.07021	7.50848	PF3D7_0925900	LCN	lipocalin
Pf3D7_09_v3	1061307	1062191	Szt_H3K4_peak_836	42	.	1.72975	5.73107	4.27682	PF3D7_0926200		conserved Plasmodium protein, unknown function
Pf3D7_09_v3	1083199	1083843	Szt_H3K4_peak_837	32	.	1.59643	4.66432	3.27545	intergenic
Pf3D7_09_v3	1120379	1120941	Szt_H3K4_peak_838	16	.	1.46497	2.84599	1.60803	PF3D7_0927500		dynein light chain, putative
Pf3D7_09_v3	1121623	1122214	Szt_H3K4_peak_839	202	.	2.69763	22.2818	20.2751	PF3D7_0927600		RNA-binding protein, putative
Pf3D7_09_v3	1134986	1136425	Szt_H3K4_peak_840	140	.	2.29672	15.894	14.0502	PF3D7_0928000	COX6B	cytochrome c oxidase subunit 6B, putative	PF3D7_0928100		conserved Plasmodium protein, unknown function
Pf3D7_09_v3	1167956	1168326	Szt_H3K4_peak_841	14	.	1.41051	2.67466	1.45698	intergenic
Pf3D7_09_v3	1173745	1175048	Szt_H3K4_peak_842	62	.	1.88292	7.7832	6.21455	PF3D7_0929400	RhopH2	high molecular weight rhoptry protein 2
Pf3D7_09_v3	1199153	1201271	Szt_H3K4_peak_843	134	.	2.24518	15.2577	13.442	intergenic
Pf3D7_09_v3	1201719	1202278	Szt_H3K4_peak_844	97	.	1.98927	11.5172	9.7932	PF3D7_0930300	MSP1	merozoite surface protein 1
Pf3D7_09_v3	1210925	1211790	Szt_H3K4_peak_845	160	.	2.33136	17.932	16.0269	PF3D7_0930500	DGK1	diacylglycerol kinase, putative
Pf3D7_09_v3	1240110	1240772	Szt_H3K4_peak_846	29	.	1.58799	4.29689	2.93263	intergenic
Pf3D7_09_v3	1245154	1246206	Szt_H3K4_peak_847	22	.	1.54261	3.57821	2.27366	intergenic
Pf3D7_09_v3	1246823	1247088	Szt_H3K4_peak_848	30	.	1.62997	4.44101	3.06625	PF3D7_0930900	NFU1	NifU-like protein, putative
Pf3D7_09_v3	1247686	1248207	Szt_H3K4_peak_849	23	.	1.51159	3.62417	2.31977	PF3D7_0931000		elongation factor Tu, putative
Pf3D7_09_v3	1259943	1260776	Szt_H3K4_peak_850	274	.	2.75127	29.4197	27.4347	PF3D7_0931300		conserved Plasmodium protein, unknown function
Pf3D7_09_v3	1266919	1269137	Szt_H3K4_peak_851	66	.	1.90227	8.21803	6.65139	PF3D7_0931600		conserved protein, unknown function
Pf3D7_09_v3	1272394	1272651	Szt_H3K4_peak_852	56	.	1.85486	7.19218	5.63608	PF3D7_0931800		proteasome subunit beta type-6, putative
Pf3D7_09_v3	1282621	1282890	Szt_H3K4_peak_853	40	.	1.60972	5.52356	4.07504	intergenic
Pf3D7_09_v3	1283381	1283974	Szt_H3K4_peak_854	34	.	1.64708	4.83825	3.45028	intergenic
Pf3D7_09_v3	1285460	1286775	Szt_H3K4_peak_855	41	.	1.7267	5.62167	4.17384	PF3D7_0932200	PFN	profilin
Pf3D7_09_v3	1353167	1353536	Szt_H3K4_peak_856	27	.	1.60136	4.11664	2.76189	PF3D7_0934600		conserved Plasmodium protein, unknown function
Pf3D7_09_v3	1354318	1354628	Szt_H3K4_peak_857	50	.	1.80635	6.52992	5.01933	PF3D7_0934600		conserved Plasmodium protein, unknown function
Pf3D7_09_v3	1358164	1358407	Szt_H3K4_peak_858	33	.	1.50182	4.76952	3.36973	intergenic
Pf3D7_09_v3	1359430	1362373	Szt_H3K4_peak_859	66	.	1.86049	8.18822	6.65236	PF3D7_0934800	PKAc	cAMP-dependent protein kinase catalytic subunit
Pf3D7_09_v3	1364405	1365263	Szt_H3K4_peak_860	28	.	1.52392	4.23615	2.88825	PF3D7_0934900		conserved Plasmodium protein, unknown function
Pf3D7_09_v3	1373645	1374533	Szt_H3K4_peak_861	108	.	2.18048	12.5752	10.8298	intergenic
Pf3D7_09_v3	1375676	1376806	Szt_H3K4_peak_862	116	.	2.15885	13.3542	11.6398	intergenic
Pf3D7_09_v3	1380703	1382330	Szt_H3K4_peak_863	36	.	1.67077	5.03748	3.62781	intergenic
Pf3D7_09_v3	1382963	1386622	Szt_H3K4_peak_864	99	.	2.1381	11.7212	9.99591	intergenic
Pf3D7_09_v3	1387241	1388467	Szt_H3K4_peak_865	54	.	1.78903	6.90796	5.40042	intergenic
Pf3D7_09_v3	1389026	1396896	Szt_H3K4_peak_866	140	.	2.16546	15.6888	14.0051	intergenic
Pf3D7_09_v3	1403882	1404275	Szt_H3K4_peak_867	137	.	2.38745	15.6218	13.7437	PF3D7_0935600	GIG	gametocytogenesis-implicated protein
Pf3D7_09_v3	1411371	1413265	Szt_H3K4_peak_868	57	.	1.84167	7.28768	5.75108	PF3D7_0935800	CLAG9	cytoadherence linked asexual protein 9
Pf3D7_09_v3	1423389	1424065	Szt_H3K4_peak_869	34	.	1.65377	4.86585	3.47582	intergenic
Pf3D7_09_v3	1424715	1425022	Szt_H3K4_peak_870	53	.	1.84057	6.89089	5.35283	intergenic
Pf3D7_09_v3	1428770	1429279	Szt_H3K4_peak_871	134	.	2.37467	15.3158	13.442	PF3D7_0936100	ETRAMP9	early transcribed membrane protein
Pf3D7_09_v3	1435263	1435502	Szt_H3K4_peak_872	22	.	1.54558	3.56287	2.25595	PF3D7_0936300	REX3	ring-exported protein 3
Pf3D7_09_v3	1448592	1450413	Szt_H3K4_peak_873	42	.	1.70888	5.71927	4.25622	intergenic
Pf3D7_09_v3	1452051	1452718	Szt_H3K4_peak_874	47	.	1.78343	6.29133	4.79344	intergenic
Pf3D7_09_v3	1453296	1453845	Szt_H3K4_peak_875	22	.	1.54377	3.58346	2.28048	PF3D7_0936700		lysophospholipase, putative
Pf3D7_09_v3	1454306	1454925	Szt_H3K4_peak_876	22	.	1.46348	3.56305	2.26454	PF3D7_0936700		lysophospholipase, putative
Pf3D7_09_v3	1458957	1459916	Szt_H3K4_peak_877	13	.	1.41087	2.57223	1.36569	intergenic
Pf3D7_09_v3	1460551	1461224	Szt_H3K4_peak_878	21	.	1.50781	3.42535	2.13624	intergenic
Pf3D7_09_v3	1461820	1464162	Szt_H3K4_peak_879	28	.	1.5643	4.23539	2.88073	intergenic
Pf3D7_09_v3	1464610	1471265	Szt_H3K4_peak_880	37	.	1.64325	5.1164	3.72407	PF3D7_0937100		Plasmodium exported protein, unknown function
Pf3D7_09_v3	1471781	1473575	Szt_H3K4_peak_881	45	.	1.70145	6.02541	4.55393	intergenic
Pf3D7_09_v3	1474585	1475656	Szt_H3K4_peak_882	46	.	1.72672	6.09057	4.60484	PF3D7_0937300	RIF	rifin
[truncated: 854 more rows]
