# Supplementary material for: PfMORC protein regulates chromatin accessibility and transcriptional repression in the human malaria parasite, Plasmodium falciparum
Source: eLife. 2024 Dec 5;12:RP92499. doi: 10.7554/eLife.92499 (PMC11620747; doi:10.7554/eLife.92499)
Supplement: Supplementary file 5. — Experiments were conducted in triplicates with parasitemia quantified via relative fluorescence units (RFUs) obtained by SYBR green assay for each time point. Significance derived through two-way ANOVA. [file elife-92499-supp5.xlsx]

## Sheet: File_5_parasite_survival_assay
Supplementary File 5. Parasite Survival Assay illustrating effect of PfMORC downregulation on parasites at ring stage (top) or trophozoite stage (bottom) cell cycle. Experiments were conducted in triplicates with parasitemia quantified via Relative Fluorescence Units (RFUs) obtained by SYBR green assay for each time point. Significance derived through 2 way ANOVA.
Parasite Survival Assay_aTC removal at Ring stage
	WT			(+)aTC MORC			(-)aTC MORC			2 way ANOVA Significance	Adjusted P-value
Hours	Average RFU	stdev	replicates	Average RFU	stdev	replicates	Average RFU	stdev	replicates
0	290.007	28.729	3	312.718	8.46759	3	310.894	27.2222	3	ns	>0.9999
48	390.246	2.0244	3	339.935	30.3356	3	215.869	33.4688	3	ns	0.7995
72	406.123	9.97836	3	412.219	23.1624	3	190.617	16.8784	3	ns	0.2154
96	676.783	27.3953	3	775.689	73.6153	3	155.783	12.2995	3	****	<0.0001
120	654.415	34.5249	3	940.205	90.6261	3	145.794	21.868	3	****	<0.0001
144	1349.33	195.084	3	1760.73	410.621	3	119.445	11.6549	3	****	<0.0001
Parasite Survival Assay_aTC removal at Trophozoite stage
	WT			(+)aTC MORC			(-)aTC MORC			2 way ANOVA Significance	Adjusted P-value
Hours	Average RFU	stdev	replicates	Average RFU	stdev	replicates	Average RFU	stdev	replicates
24	259.556	11.248	3	513.966	37.8013	3	525.581	67.1726	3	ns	>0.9999
48	653.557	13.0751	3	815.716	79.5589	3	732.119	66.5187	3	ns	0.7549
72	1271.41	20.236	3	1747.71	131.728	3	1101.58	19.3887	3	****	<0.0001
96	1600.91	83.1922	3	1862.48	24.5234	3	1075.91	41.5872	3	****	<0.0001
120	2139.46	42.9515	3	2447.94	179.282	3	852.823	64.9708	3	****	<0.0001
