# Supplementary material for: PfMORC protein regulates chromatin accessibility and transcriptional repression in the human malaria parasite, Plasmodium falciparum
Source: eLife. 2024 Dec 5;12:RP92499. doi: 10.7554/eLife.92499 (PMC11620747; doi:10.7554/eLife.92499)
Supplement: Supplementary file 6. — (a) RNA-seq read counts of PfMORC at 24 and 36 hr. DEseq2 analysis of differentially expressed genes of PfMORC at (b) 24 hr and (c) 36 hr. [file elife-92499-supp6.xlsx]

## Sheet: File_6a_RNAseq_read_counts
Supplementary File 6a: RNA-seq read counts of PfMORC at 24 and 36 hours.
gene	name	description	aTCpos_24h_A	aTCpos_24h_B	aTCneg_24h_A	aTCneg_24h_B	aTCpos_36h_A	aTCpos_36h_B	aTCneg_36h_A	aTCneg_36h_B
PF3D7_0100100	VAR	erythrocyte membrane protein 1, PfEMP1	1875	2076	1360	1829	5422	1602	3031	2907
PF3D7_0100200	RIF	rifin	41	34	22	20	53	44	46	74
PF3D7_0100300	VAR	erythrocyte membrane protein 1, PfEMP1	18	32	6	14	21	18	11	17
PF3D7_0100400	RIF	rifin	191	184	168	267	326	86	338	288
PF3D7_0100500		erythrocyte membrane protein 1 (PfEMP1), exon 1, pseudogene	11	4	3	1	13	5	7	18
PF3D7_0100600	RIF	rifin	8	10	8	8	59	21	48	42
PF3D7_0100700		Plasmodium exported protein, unknown function, fragment	1	2	0	0	2	0	0	2
PF3D7_0100800	RIF	rifin	3	2	25	8	12	8	0	10
PF3D7_0100900	RIF	rifin	27	8	7	11	22	6	8	5
PF3D7_0101000	RIF	rifin	21	15	5	12	13	3	8	1
PF3D7_0101100	EPF4	exported protein family 4	0	0	2	2	2	1	3	0
PF3D7_0101200	EPF3	exported protein family 3	0	6	0	0	2	0	0	0
PF3D7_0101300	MC-2TM	Pfmc-2TM Maurer's cleft two transmembrane protein	45	89	36	46	38	25	26	21
PF3D7_0101400	EPF1	exported protein family 1, pseudogene	0	0	0	0	0	0	2	0
PF3D7_0101500	VAR	erythrocyte membrane protein 1 (PfEMP1), exon 2, pseudogene	0	21	9	5	16	8	6	2
PF3D7_0101600	RIF	rifin	4	8	1	6	17	8	4	14
PF3D7_0101700	VAR	erythrocyte membrane protein 1 (PfEMP1), exon 2, pseudogene	5	8	0	0	5	4	2	0
PF3D7_0101800		stevor	2	2	8	2	7	0	2	5
PF3D7_0101900	RIF	rifin	2	6	10	0	23	10	16	12
PF3D7_0102000		Plasmodium exported protein (PHISTa), unknown function, pseudogene	4	15	0	5	18	10	4	12
PF3D7_0102100		stevor, pseudogene	14	8	6	18	18	1	8	4
PF3D7_0102200	RESA	ring-infected erythrocyte surface antigen	1098	1463	1166	1199	254506	69596	162863	166699
PF3D7_0102300		Plasmodium exported protein, unknown function	15032	13955	9579	13819	2981	856	3336	2826
PF3D7_0102400		lysophospholipase, putative, pseudogene	358	489	313	337	626	200	195	187
PF3D7_0102500	EBA181	erythrocyte binding antigen-181	971	1545	743	646	70874	19587	22104	28146
PF3D7_0102600	FIKK1	serine/threonine protein kinase, FIKK family	438	558	431	577	1746	594	364	551
PF3D7_0102700	MaTrA	merozoite-associated tryptophan-rich antigen	352	461	245	274	4188	1547	3123	3302
PF3D7_0102800		seipin domain-containing protein, putative	2013	2177	1379	1726	855	219	266	331
PF3D7_0102900		aspartate--tRNA ligase	14719	14985	10478	14271	3129	1046	1908	1654
PF3D7_0103000		vacuolar protein sorting-associated protein VTA1, putative	641	662	523	686	1320	294	877	973
PF3D7_0103100	VPS51	vacuolar protein sorting-associated protein 51, putative	3093	4372	2081	1974	3302	925	697	783
PF3D7_0103200	NT4	nucleoside transporter 4	20532	29349	17327	17887	12155	3606	5959	6728
PF3D7_0103300		conserved protein, unknown function	8146	9349	5239	5968	11404	3381	2176	2750
PF3D7_0103400		zinc-carboxypeptidase, putative	20454	30868	17946	17210	31648	10119	9497	11525
PF3D7_0103500		conserved Plasmodium protein, unknown function	1244	1413	777	1135	980	337	477	499
PF3D7_0103600	PSH1	ATP-dependent DNA/RNA helicase PSH1	11317	18567	7332	8399	6005	1468	1033	1422
PF3D7_0103700	PSTK	L-seryl-tRNA(Sec) kinase, putative	4941	5841	3587	2989	2488	740	455	532
PF3D7_0103800	ARP1	actin-related protein ARP1, putative	900	1059	918	1281	2341	847	4308	3623
PF3D7_0103900	PIESP15	parasite-infected erythrocyte surface protein	11051	13694	8692	10252	3776	864	1403	1273
PF3D7_0104000	TRSP	thrombospondin-related sporozoite protein	150	112	83	91	325	110	399	477
PF3D7_0104100		protein E140, putative	2698	3746	2238	1750	11459	3014	2370	3125
PF3D7_0104200		StAR-related lipid transfer protein	2225	2370	1937	2782	6695	1868	3968	3644
PF3D7_0104300	UBP1	ubiquitin carboxyl-terminal hydrolase 1, putative	30202	51842	20808	24583	142933	32892	28760	38818
PF3D7_0104400	LytB	4-hydroxy-3-methylbut-2-enyl diphosphate reductase	11122	13982	9121	8831	9224	2654	3374	3974
PF3D7_0104500		conserved protein, unknown function	20396	23310	14261	12842	2919	792	978	986
PF3D7_0104600		conserved Plasmodium protein, unknown function	2095	2550	1115	1669	713	224	211	252
PF3D7_0104700	MFR2	major facilitator superfamily-related transporter, putative	40	46	29	20	162	73	56	55
PF3D7_0104800	NPT1	novel putative transporter 1, putative	1760	2410	1390	1721	2833	846	2370	2484
PF3D7_0104900		RNase MRP	2553	2343	2012	2407	2280	804	4082	3796
PF3D7_0105000		non-coding RNA	1615	1432	1091	1389	1516	451	2673	2845
PF3D7_0105100		conserved Apicomplexan protein, unknown function	5823	7354	3277	2750	2500	911	547	590
PF3D7_0105200		heptatricopeptide repeat and RAP domain-containing protein, putative	6765	7944	5975	8313	2739	792	1641	1398
PF3D7_0105300	CAP	cyclase-associated protein	11435	13377	7124	6073	60069	19951	25730	30914
PF3D7_0105400		conserved Plasmodium protein, unknown function	346	438	250	313	10330	3065	8210	8991
PF3D7_0105400.2			170	210	132	212	6027	1808	6334	6609
PF3D7_0105500		conserved protein, unknown function	74	103	50	124	180	57	352	312
PF3D7_0105600		FtsJ-like methyltransferase, putative	2132	2452	1550	2017	939	333	643	644
PF3D7_0105700		asparagine-rich antigen Pfa35-2	5780	8730	3989	5024	5511	1217	956	1415
PF3D7_0105800		cyclin-dependent kinases regulatory subunit, putative	21579	23404	15015	17825	30965	9197	12597	13097
PF3D7_0105900		3'-5' exonuclease, putative	5140	7603	3291	3021	6786	1807	1324	1795
PF3D7_0106000		conserved protein, unknown function	6366	7175	4600	5673	18800	5174	8889	9099
PF3D7_0106100		V-type proton ATPase subunit C, putative	2384	2390	2117	3131	1293	476	1792	1447
PF3D7_0106200		EF hand domain-containing protein, putative	847	869	486	619	1912	669	494	646
PF3D7_0106300	ATP6	calcium-transporting ATPase	34451	36854	26052	30212	28170	7707	23955	24611
PF3D7_0106400		pre-rRNA-processing protein TSR2, putative	10966	14290	10830	10362	1796	757	2470	2554
PF3D7_0106500		conserved Plasmodium protein, unknown function	3964	4556	2120	3128	4078	1126	859	1226
PF3D7_0106600		conserved Plasmodium protein, unknown function	15	33	6	29	368	116	146	135
PF3D7_0106700	AARP2	small ribosomal subunit assembling AARP2 protein	11000	13252	8207	9853	7441	2087	2048	2246
PF3D7_0106800	RAB5c	ras-related protein Rab-5C	3370	3316	3134	3342	2582	499	3145	3134
PF3D7_0106900	IspD	2-C-methyl-D-erythritol 4-phosphate cytidylyltransferase, putative	8655	11694	6583	6028	6519	1525	2494	2722
PF3D7_0107000	CEN1	centrin-1	37309	38444	29563	24825	29837	11808	8513	7924
PF3D7_0107100		conserved protein, unknown function	1867	2030	1233	1303	351	160	179	141
PF3D7_0107200	CCR4-3	CCR4 domain-containing protein 3, putative	3823	4982	2976	2884	806	316	355	441
PF3D7_0107300		conserved Plasmodium protein, unknown function	687	825	396	443	484	197	179	223
PF3D7_0107400	ATPk	ATP synthase-associated protein, putative	1731	2351	1208	1382	1340	559	1007	1148
PF3D7_0107500	NCR1	Niemann-Pick type C1-related protein	15745	19362	13178	17211	20159	6025	14311	15147
PF3D7_0107600	eIK2	eukaryotic translation initiation factor 2-alpha kinase 2, putative	304	454	474	239	799	271	278	444
PF3D7_0107700		dolichyl-diphosphooligosaccharide--protein glycosyltransferase subunit OST3/OST6, putative	1655	1936	1484	1594	622	160	504	473
PF3D7_0107800	MRE11	double-strand break repair protein MRE11	12210	13436	6949	9429	4311	1211	866	1044
PF3D7_0107900		conserved Plasmodium protein, unknown function	3087	4861	2223	2169	766	325	183	204
PF3D7_0108000		proteasome subunit beta type-3, putative	27432	29753	21700	19628	19455	6108	17330	20519
PF3D7_0108100		conserved protein, unknown function	3723	4678	2850	2381	2848	696	547	718
PF3D7_0108300	ARP	conserved Plasmodium protein, unknown function	63089	84584	42447	50103	64801	15533	14654	19655
PF3D7_0108400		mitochondrial carrier protein, putative	2333	2594	2006	2098	1522	400	1969	2313
PF3D7_0108400.2			377	428	253	353	162	36	314	316
PF3D7_0108500		ELM2 domain-containing protein, putative	6020	8296	6541	6408	87169	25843	29519	33686
PF3D7_0108600		DnaJ domain-containing protein, putative	15068	18296	12861	12363	89985	26788	30614	34945
PF3D7_0108700	PSOP24	secreted ookinete protein, putative	8678	14097	8006	8189	5921	1634	1770	1730
PF3D7_0108800		mitochondrial carrier protein, putative	5638	5759	3848	5245	3833	1360	2502	2157
PF3D7_0108900		non-coding RNA	56	534	20	29	5157	1728	3216	3226
PF3D7_0109000	PHIL1	photosensitized INA-labeled protein PHIL1	168	201	169	159	15330	5412	21777	23353
PF3D7_0109100	CCp5	LCCL domain-containing protein	130	190	147	147	15011	4787	4477	4962
PF3D7_0109200	CFIM25	cleavage and polyadenylation specificity factor subunit 5, putative	1566	1897	1422	1579	863	285	371	457
PF3D7_0109300		elongation of fatty acids protein, putative	3197	3696	1925	1838	3543	915	775	990
PF3D7_0109400		tubulin-specific chaperone a, putative	8296	9336	6001	7445	2168	874	899	941
PF3D7_0109500		N-acetyltransferase, GNAT family, putative	2717	3235	2635	2248	1443	404	787	874
PF3D7_0109600	CoSP	cold-shock protein, putative	2280	3121	2207	1866	684	207	409	431
PF3D7_0109700	RRP36	rRNA biogenesis protein RRP36, putative	6731	9434	5601	4444	3083	1001	1287	1473
PF3D7_0109800	cPheRS	phenylalanine--tRNA ligase alpha subunit	6377	8577	5363	5197	3171	1028	1103	1272
PF3D7_0109850		phosphatidate cytidylyltransferase, putative	2326	3067	2198	2305	2409	555	2118	2375
PF3D7_0109950	C2AP3	respiratory chain complex 2 associated protein 3	3104	3390	2729	3340	2092	734	2314	1836
PF3D7_0110000		conserved Plasmodium protein, unknown function	5604	7276	4150	3985	2659	923	1307	1410
PF3D7_0110100	SELB	selenocysteine-specific elongation factor, putative	4050	4506	2816	3440	1272	428	608	671
PF3D7_0110200	ERV1	FAD-linked sulfhydryl oxidase ERV1, putative	3863	4976	2488	2483	1501	455	597	714
PF3D7_0110300		Plasmodium RNA of unknown function RUF5	1065	1418	739	645	328	97	183	221
PF3D7_0110400	RPB9	DNA-directed RNA polymerase II subunit RPB9, putative	11332	15545	10779	9186	5069	1656	5308	5807
PF3D7_0110500	BDP3	bromodomain protein 3, putative	7907	9749	4578	6169	3823	999	779	1180
PF3D7_0110600	PIP5K	phosphatidylinositol-4-phosphate 5-kinase	16948	30855	16350	14470	17876	5345	5332	6362
PF3D7_0110700	CAF1C	chromatin assembly factor 1 subunit C, putative	35699	49023	29566	27544	8970	3006	3468	3715
PF3D7_0110800		transcription initiation factor TFIIB, putative	7693	9164	6209	7507	4981	1235	3007	3286
PF3D7_0110900	AKLP1	adenylate kinase-like protein 1	7212	8942	5272	4001	1540	448	585	684
PF3D7_0111000		kinesin-8B, putative	4089	5027	3306	3490	5600	1548	1976	2312
PF3D7_0111200		conserved protein, unknown function	6793	8337	4337	2568	2814	893	1136	1468
PF3D7_0111300		P-loop containing nucleoside triphosphate hydrolase, putative	34592	44245	18544	20308	20384	5731	3328	3992
PF3D7_0111400	GEXP19	conserved Plasmodium protein, unknown function	17375	22330	10099	10091	12403	3640	1978	2313
PF3D7_0111500		UMP-CMP kinase, putative	9119	9614	7382	9458	14719	3836	8249	7746
PF3D7_0111600		conserved Plasmodium protein, unknown function	1122	1269	747	952	387	89	140	187
PF3D7_0111700		conserved protein, unknown function	323	390	196	259	139	46	61	48
PF3D7_0111800		eukaryotic translation initiation factor 4E, putative	20920	27823	16114	16995	5399	1544	2000	2103
PF3D7_0111900		mitochondrial distribution and morphology protein, putative	6238	7815	4739	4867	3571	1068	2123	1892
PF3D7_0112000	TatD	TatD-like deoxyribonuclease	2726	3424	2338	2379	1440	345	633	712
PF3D7_0112100	PIMMS1	PIMMS1 protein	14	11	4	9	23	12	15	12
PF3D7_0112200	MRP1	multidrug resistance-associated protein 1	30171	34841	20276	23746	10002	2725	2430	2597
PF3D7_0112300		18S ribosomal RNA	0	0	0	0	0	0	0	0
PF3D7_0112500		5.8S ribosomal RNA	0	0	0	0	0	0	0	0
PF3D7_0112700		28S ribosomal RNA	0	0	0	0	0	0	0	0
PF3D7_0112800		Plasmodium exported protein (hyp11), unknown function	696	752	520	464	2207	595	769	953
PF3D7_0112900		Plasmodium exported protein, unknown function	602	717	323	455	4854	1776	1269	1596
PF3D7_0113000	GARP	glutamic acid-rich protein GARP	126147	197512	88645	86021	24000	6152	3322	4781
PF3D7_0113100	SURF1.1	surface-associated interspersed protein 1.1 (SURFIN 1.1)	108	146	109	69	164	65	48	70
PF3D7_0113200		Plasmodium exported protein, unknown function	9148	12167	7421	7858	3586	981	894	1226
PF3D7_0113300		Plasmodium exported protein (hyp1), unknown function	1473	1700	1136	1343	2672	589	939	991
PF3D7_0113400		Plasmodium exported protein, unknown function	311	443	246	258	63	35	35	66
PF3D7_0113600	SURF1.2	surface-associated interspersed protein 1.2 (SURFIN 1.2), pseudogene	74	131	48	79	173	82	62	64
PF3D7_0113700	HSP40	heat shock protein 40, type II	3038	4393	2711	2596	3434	1115	2159	2114
PF3D7_0113800		DBL containing protein, unknown function	2083	3384	1690	2122	1715	415	392	535
PF3D7_0113900	CBP1	CX3CL1-binding protein 1	595	769	454	434	1364	548	673	746
PF3D7_0114000	EPF1	exported protein family 1	164	201	92	109	418	110	79	133
PF3D7_0114100	MC-2TM	Pfmc-2TM Maurer's cleft two transmembrane protein	306	376	291	215	385	114	62	83
PF3D7_0114200	EPF3	exported protein family 3	7	32	4	4	12	0	10	0
PF3D7_0114300	EPF4	exported protein family 4, pseudogene	8	22	11	25	15	2	6	11
PF3D7_0114400	VAR	erythrocyte membrane protein 1 (PfEMP1), exon 2, pseudogene	8	27	18	12	32	7	13	3
PF3D7_0114500		Plasmodium exported protein (hyp10), unknown function	105	213	103	79	86	36	14	25
PF3D7_0114600		stevor, pseudogene	16	31	4	14	29	1	3	4
PF3D7_0114700	RIF	rifin	7	17	2	8	11	5	0	6
PF3D7_0114750		Plasmodium exported protein, unknown function, fragment	0	1	0	0	1	2	0	0
PF3D7_0114800		Plasmodium exported protein (hyp7), unknown function	11	1	3	2	0	2	4	2
PF3D7_0114900		Plasmodium exported protein, unknown function, pseudogene	0	4	7	6	10	5	3	0
PF3D7_0115000	SURF1.3	surface-associated interspersed protein 1.3 (SURFIN 1.3)	25	30	10	21	29	36	4	14
PF3D7_0115050		H/ACA snoRNA	6	0	0	2	1	0	1	2
PF3D7_0115100		Plasmodium exported protein (PHISTa), unknown function	105	83	59	42	214	46	52	46
PF3D7_0115150		Plasmodium exported protein, unknown function, pseudogene	3	2	0	0	12	0	0	3
PF3D7_0115200	RIF	rifin	9	8	2	6	6	13	4	21
PF3D7_0115300	RIF	rifin	6	2	2	8	22	9	0	1
PF3D7_0115400		stevor	20	25	9	7	20	4	16	9
PF3D7_0115500		erythrocyte membrane protein 1 (PfEMP1), pseudogene	2	29	2	6	11	3	12	5
PF3D7_0115600	RIF	rifin	48	75	66	77	112	19	94	89
PF3D7_0115700	VAR	erythrocyte membrane protein 1, PfEMP1	196	247	121	158	361	97	175	218
PF3D7_0200100	VAR	erythrocyte membrane protein 1, PfEMP1	2	10	2	2	4	0	0	6
PF3D7_0200200	RIF	rifin	0	0	0	0	0	0	0	0
PF3D7_0200300		erythrocyte membrane protein 1 (PfEMP1), exon 2	0	0	1	0	0	0	1	0
PF3D7_0200400		stevor	2	0	0	0	0	0	0	0
PF3D7_0200500	RIF	rifin	4	0	0	0	0	2	0	4
PF3D7_0200600	RIF	rifin	2	0	8	0	2	1	0	0
PF3D7_0200700	RIF	rifin	0	1	0	0	0	0	0	0
PF3D7_0200800		erythrocyte membrane protein 1 (PfEMP1), exon 2, pseudogene	0	1	2	4	0	0	0	0
PF3D7_0200900		stevor, pseudogene	0	1	0	0	0	3	0	0
PF3D7_0201000	RIF	rifin	1	0	0	0	0	0	2	0
PF3D7_0201100		Plasmodium exported protein, unknown function, fragment	0	0	0	0	0	0	0	0
PF3D7_0201200	RIF	rifin	0	2	0	0	0	0	0	3
PF3D7_0201300		stevor	0	2	0	0	4	0	2	0
PF3D7_0201400		Plasmodium exported protein (hyp10), unknown function	0	0	0	2	1	0	0	0
PF3D7_0201500		Plasmodium exported protein (hyp9), unknown function	5	4	4	1	8	5	1	5
PF3D7_0201600	RLP1	PHISTb domain-containing RESA-like protein 1	8	7	0	2	2	0	3	0
PF3D7_0201700		DnaJ protein, putative	14	47	15	7	59	25	21	15
PF3D7_0201800	KAHsp40	knob associated heat shock protein 40	0	0	4	0	1	2	6	6
PF3D7_0201900	EMP3	erythrocyte membrane protein 3	3	2	0	2	12	8	23	5
PF3D7_0202000	KAHRP	knob-associated histidine-rich protein	21	6	16	0	6	2	3	5
PF3D7_0202100	LSAP2	liver stage associated protein 2	43	15	195	260	32	176	309	294
PF3D7_0202200	PTP1	EMP1-trafficking protein	16	8	88	60	4	56	79	78
PF3D7_0202300		Plasmodium exported protein (hyp11), unknown function	0	0	1233	0	74	994	1	4
PF3D7_0202400	PTEF	translation-enhancing factor	17	24	38	27	50	38	43	57
PF3D7_0202500	ETRAMP2	early transcribed membrane protein 2	2168	3095	1876	1989	277972	91028	208922	227729
PF3D7_0202600		nucleic acid-binding protein, putative	3215	4021	2305	3370	3100	899	681	825
PF3D7_0202600.2			3164	3994	2285	3319	3077	883	650	758
PF3D7_0202700	OPP	octaprenyl pyrophosphate synthase	5365	6167	3435	3456	4958	1557	1405	1587
PF3D7_0202800		conserved Plasmodium protein, unknown function	3351	3586	2099	2002	5265	1645	1416	1701
PF3D7_0202900	DHHC12	palmitoyltransferase DHHC12, putative	2239	2414	1152	1678	2581	862	674	843
PF3D7_0203000	ROPE	repetitive organellar protein, putative	3553	5697	2458	3142	12911	3001	3715	5122
PF3D7_0203100		protein kinase, putative	621	775	456	622	7313	1990	1892	2599
PF3D7_0203200		conserved Plasmodium protein, unknown function	965	920	775	861	1157	416	1186	935
PF3D7_0203300	ERCC1	ERCC1 nucleotide excision repair protein, putative	2450	2841	1890	2203	1939	574	2479	2552
PF3D7_0203400		conserved protein, unknown function	27155	30115	25321	21519	15944	4618	11840	14457
PF3D7_0203500		tRNA Glutamine	15	30	11	9	6	6	4	4
PF3D7_0203600		conserved Plasmodium protein, unknown function	1556	2077	1084	1060	1600	547	345	350
PF3D7_0203700	MAK16	protein MAK16, putative	5092	7621	4551	4342	2345	704	473	609
PF3D7_0203800		conserved Plasmodium protein, unknown function	2605	3130	2342	2658	848	304	1014	874
PF3D7_0203900		5'-3' exonuclease, putative	7426	8138	4648	6107	1509	525	493	423
PF3D7_0204000	CAPH2	condensin-2 complex subunit H2, putative	3217	3741	1693	1671	1456	483	204	294
PF3D7_0204100		Sel1 repeat-containing protein, putative	3828	4396	2692	3889	16130	3558	5253	6555
PF3D7_0204200	SEC66	translocation protein SEC66, putative	23367	37535	22739	19079	42109	10031	19648	22055
PF3D7_0204300		conserved Plasmodium protein, unknown function	50683	60239	31410	37095	15746	4548	3187	3806
PF3D7_0204400		dynein light chain, putative	755	668	548	898	152	68	132	109
PF3D7_0204500	AspAT	aspartate transaminase	4997	4714	3891	5919	1126	376	856	825
PF3D7_0204600		5'-3' exonuclease, putative	11761	13285	7826	8505	5907	1555	1260	1425
PF3D7_0204700	HT1	hexose transporter	5951	7028	5546	8447	3992	1264	8799	6871
PF3D7_0204800		3'-5' exonuclease, putative	12755	13584	8154	8794	3686	1131	915	1154
PF3D7_0204900	COQ5	2-methoxy-6-polyprenyl-1,4-benzoquinol methylase, mitochondrial, putative	14455	16066	10736	11864	6659	2015	6021	6361
PF3D7_0205000		conserved Plasmodium protein, unknown function	9708	13939	4771	4553	3299	1097	495	570
PF3D7_0205100		conserved Plasmodium protein, unknown function	3666	5453	2229	2622	1202	335	339	348
PF3D7_0205200		MORN repeat protein, putative	248	222	191	127	695	223	126	200
PF3D7_0205300		conserved Plasmodium protein, unknown function	1281	1440	978	892	623	207	215	326
PF3D7_0205400		PCI domain-containing protein, putative	21248	24528	14540	15170	6371	1686	2003	2226
PF3D7_0205500		DNA-directed RNA polymerase II 16 kDa subunit, putative	12949	13265	10216	12717	4231	1697	5308	4868
PF3D7_0205600		conserved Plasmodium protein, unknown function	5567	5986	4676	5368	3947	1095	3173	3419
PF3D7_0205700		RNA-binding protein, putative	3965	6471	2774	2297	5963	1332	916	1418
PF3D7_0205700.2			8585	12735	7552	7049	11646	3005	3349	3772
PF3D7_0205800	PH1	PH domain-containing protein, putative	19451	26515	12050	9899	26464	9790	5877	6712
PF3D7_0205900	RPN1	26S proteasome regulatory subunit RPN1, putative	79120	97641	60752	64643	78515	24737	31312	31232
PF3D7_0206000	RAD2	DNA repair protein RAD2, putative	5770	7485	3694	4540	18286	5427	4405	6144
PF3D7_0206100	SufE	cysteine desulfuration protein SufE	6946	8952	5370	5634	8897	2864	3872	4412
PF3D7_0206200	PAT	pantothenate transporter	1174	1271	788	849	19971	7339	17018	16259
PF3D7_0206300	AROM	pentafunctional AROM polypeptide, putative, pseudogene	28564	42846	17875	22345	10140	2629	1673	2179
PF3D7_0206500		conserved Plasmodium protein, unknown function	7808	9527	4913	5511	9239	2254	2181	2609
PF3D7_0206600		DNA-directed RNA polymerase III subunit RPC10, putative	460	546	264	321	626	190	158	224
PF3D7_0206700	ADSL	adenylosuccinate lyase	23277	26261	19884	22575	400999	114844	459413	447496
PF3D7_0206800	MSP2	merozoite surface protein 2	23243	26212	19873	22523	401034	114839	459450	447561
PF3D7_0206900	MSP5	merozoite surface protein 5	3738	4482	2848	3254	27313	8667	21349	23271
PF3D7_0206900.2			2890	3474	2156	2594	21206	6424	17047	18436
PF3D7_0207000	MSP4	merozoite surface protein 4	22334	24956	20124	18857	108080	31564	70360	82418
PF3D7_0207100		conserved Plasmodium protein, unknown function	11827	15161	10213	10459	50485	14049	18086	20273
PF3D7_0207200	ISCA1	iron-sulfur assembly protein, putative	1307	1512	823	915	4109	1515	1105	1281
PF3D7_0207300	SERA8	serine repeat antigen 8	19	34	14	29	67	28	88	73
PF3D7_0207400	SERA7	serine repeat antigen 7	17029	22719	15561	18954	23297	6529	21732	18164
PF3D7_0207500	SERA6	serine repeat antigen 6	22150	24436	20035	27475	36316	9229	32849	28795
PF3D7_0207600	SERA5	serine repeat antigen 5	55359	64620	51273	68861	126297	36450	105553	100284
PF3D7_0207700	SERA4	serine repeat antigen 4	14444	16119	13052	14534	29674	8447	30321	26652
PF3D7_0207800	SERA3	serine repeat antigen 3	10558	11871	9250	11445	20678	6487	19838	18280
PF3D7_0207900	SERA2	serine repeat antigen 2	1463	1835	1318	1442	2543	612	2128	2082
PF3D7_0208000	SERA1	serine repeat antigen 1	4091	6043	3602	3815	16859	4333	6246	6679
PF3D7_0208100		conserved Plasmodium protein, unknown function	24660	34309	19745	24392	15264	3258	5595	6076
PF3D7_0208200	KRR1	KRR1 small subunit processome component, putative	8164	10542	5993	6964	2447	737	875	818
PF3D7_0208300		conserved Plasmodium protein, unknown function	2522	2947	1393	2150	1626	514	400	501
PF3D7_0208400		conserved Plasmodium protein, unknown function	23091	35456	14512	17567	27228	7232	5959	6865
PF3D7_0208500	ACP	acyl carrier protein	6001	5555	4284	5250	2933	785	1909	1783
PF3D7_0208600	RRF1	ribosome-recycling factor	18219	22944	12132	11469	11534	3459	2226	2566
PF3D7_0208700		SHS2 domain-containing protein, putative	30237	33536	23064	17293	9022	3207	4079	5385
PF3D7_0208800		protein P22, putative	2583	3560	2466	1684	1234	743	734	881
PF3D7_0208900	P230p	6-cysteine protein P230p	157	254	123	109	179	112	43	99
PF3D7_0209000	P230	6-cysteine protein P230	72	126	152	133	112	105	157	181
PF3D7_0209100	PATPL1	patatin-like phospholipase 1	4958	4825	4204	4897	3181	918	2357	2366
PF3D7_0209200	MTR3	exosome complex component MTR3, putative	4205	4799	3351	4901	1294	542	714	629
PF3D7_0209300	IspF	2C-methyl-D-erythritol 2,4-cyclodiphosphate synthase	3457	3871	2643	3434	1187	549	963	779
PF3D7_0209400		ARMT1-like domain-containing protein, putative	5619	6503	4541	6526	1593	589	1576	1361
PF3D7_0209500		conserved Plasmodium protein, unknown function	122	126	53	87	10588	2883	3123	3577
PF3D7_0209600		transporter, putative	2625	3134	2060	2740	9937	3575	11742	10433
PF3D7_0209700		RING zinc finger protein, putative	7067	9027	5982	5295	14431	3893	6481	7439
PF3D7_0209800	UAP56	ATP-dependent RNA helicase UAP56	114468	146074	83245	84395	36347	11355	12630	13068
PF3D7_0209900		non-coding RNA	507	1191	437	384	399	109	114	111
PF3D7_0210000	Sec61-gamma	secretory complex protein 61 gamma subunit	16625	20089	11576	12483	12299	4241	9216	9740
PF3D7_0210100	RPL37A	60S ribosomal protein L37ae, putative	139942	167283	112953	94329	41847	15575	23766	25185
PF3D7_0210100.2			83240	99665	67334	58361	24626	9232	14637	15412
PF3D7_0210200		conserved Plasmodium protein, unknown function	30249	38842	17265	22114	24214	7756	4119	4646
PF3D7_0210300		monocarboxylate transporter, putative	4799	5885	4095	4457	3949	1368	2866	3139
PF3D7_0210400		50S ribosomal protein L33, putative	6696	6839	4640	5511	1721	617	955	999
PF3D7_0210500		conserved Plasmodium protein, unknown function	4633	6525	2760	2831	3278	1094	926	1171
PF3D7_0210600	CERLI1	protein CERLI1	1047	1085	789	814	80494	24852	43899	46707
PF3D7_0210700	SYN17	syntaxin, Qa-SNARE family	717	769	570	600	8601	3376	7814	7678
PF3D7_0210800		conserved Plasmodium protein, unknown function	2798	4179	2354	2189	4491	1284	3612	3636
PF3D7_0210900		conserved Plasmodium protein, unknown function	50729	65588	38993	36993	22416	6404	6850	6803
PF3D7_0211000		non-coding RNA	111	114	57	118	134	42	62	88
PF3D7_0211100		conserved Plasmodium protein, unknown function	677	657	621	724	236	99	87	95
PF3D7_0211200	RAB5a	ras-related protein Rab-5A	4743	5143	3075	3339	2270	744	984	798
PF3D7_0211300		ubiquinol-cytochrome-c reductase complex assembly factor 1, putative	1063	990	821	1178	601	209	615	556
PF3D7_0211400	KASIII	beta-ketoacyl-ACP synthase III	422	329	274	268	274	141	122	166
PF3D7_0211500		GAF domain-related protein, putative	839	1175	676	727	1788	529	555	715
PF3D7_0211600	ALG14	UDP-N-acetylglucosamine transferase subunit ALG14, putative	616	712	382	413	2301	866	1512	1886
PF3D7_0211700	TKL1	tyrosine kinase-like protein, putative	11675	16244	8298	9289	5398	1259	1544	1859
PF3D7_0211800	AsnRS	asparagine--tRNA ligase	38352	45373	27102	32188	11437	4304	6823	6487
PF3D7_0211900		pseudouridine synthase, putative	18190	22789	10574	10629	8490	3037	2310	2395
PF3D7_0212000		GDP-fructose:GMP antiporter, putative	5904	8752	4685	4555	3913	1235	1155	1452
PF3D7_0212100		conserved Plasmodium protein, unknown function	15681	17684	10920	16773	11312	2084	2854	3275
PF3D7_0212200		ribosomal protein L12, mitochondrial, putative	7306	8876	5091	5677	2020	563	604	657
PF3D7_0212300	ERF1	eukaryotic peptide chain release factor subunit 1, putative	12766	12607	10973	13059	4678	1010	2424	2570
PF3D7_0212400		conserved Plasmodium membrane protein, unknown function	18078	25002	10138	14190	11720	2917	1861	2223
PF3D7_0212500		conserved Plasmodium protein, unknown function	15178	24330	11150	14470	10300	3019	3122	3440
PF3D7_0212600	SPATR	secreted protein with altered thrombospondin repeat domain	827	907	688	775	21457	7841	26388	27491
PF3D7_0212700		SRR1-like protein	1860	1909	1035	1678	1158	493	536	695
PF3D7_0212800	MATE	multidrug efflux pump, putative	2442	2712	1623	1830	1802	520	989	1031
PF3D7_0212900	ATEL1	arginyl-tRNA--protein transferase	9208	10448	7079	7644	16274	4931	13749	14240
PF3D7_0213000		conserved protein, unknown function	6934	7942	4343	5209	4642	1704	3318	3199
PF3D7_0213100	SIS1	protein SIS1	11244	16290	9497	10939	2690	1080	2690	2202
PF3D7_0213200		mitochondrial respiratory chain complex II subunit, putative	10249	14642	7452	6471	6598	2698	964	1029
PF3D7_0213300		conserved protein, unknown function	2418	2406	2078	2442	693	242	476	482
PF3D7_0213400	PK7	protein kinase 7	9288	10157	7395	9178	2631	1070	2218	2073
PF3D7_0213500		tetratricopeptide repeat protein, putative	5167	5245	3518	4368	1695	650	1095	1022
PF3D7_0213600		conserved Plasmodium protein, unknown function	2489	1453	1159	947	552	110	158	214
PF3D7_0213700		conserved protein, unknown function	2677	3989	2489	2689	275	143	363	331
PF3D7_0213800		conserved protein, unknown function	381	349	258	252	78	20	86	70
PF3D7_0213900		RTR1 domain-containing protein, putative	4345	6204	3224	4411	1121	391	680	646
PF3D7_0214000	CCT8	T-complex protein 1 subunit theta	23704	26550	20262	23602	3973	1117	3070	2870
PF3D7_0214100	SEC31	protein transport protein SEC31	23038	30032	20751	24823	32380	8959	16563	16143
PF3D7_0214200	mRPL13	ribosomal protein L13, mitochondrial	5691	6176	4150	5836	2484	847	2610	2379
PF3D7_0214300		conserved Plasmodium protein, unknown function	531	785	408	525	730	236	199	316
PF3D7_0214400		protein LTV1, putative	10054	18237	9712	8488	4272	1020	1179	1444
PF3D7_0214500		conserved Plasmodium protein, unknown function	1211	1277	790	1012	600	234	259	331
PF3D7_0214600	STK2	serine/threonine protein kinase STK2, putative	615	916	496	408	106606	29988	26913	33551
PF3D7_0214700		conserved Plasmodium protein, unknown function	167	207	78	121	23271	7818	6413	7785
PF3D7_0214800		conserved Plasmodium membrane protein, unknown function	906	1666	940	1038	4399	1579	1358	1824
PF3D7_0214900	RON6	rhoptry neck protein 6	3683	4699	2530	2595	140115	35132	34288	44380
PF3D7_0215000	ACS9	acyl-CoA synthetase	5166	9412	4407	4036	4100	1263	1381	1443
PF3D7_0215100		RING zinc finger protein, putative	3141	2918	2141	3265	3977	1328	3756	3240
PF3D7_0215200		conserved Plasmodium protein, unknown function	389	489	236	190	648	214	210	192
PF3D7_0215300	ACS8	acyl-CoA synthetase	152	187	117	128	5116	1268	1542	1620
PF3D7_0215400		conserved Plasmodium protein, unknown function	11055	16671	9460	9101	13146	4300	5988	6246
PF3D7_0215500		conserved Plasmodium protein, unknown function	6574	7982	3539	4003	7387	2144	1221	1708
PF3D7_0215600	GET2	Golgi to ER traffic protein 2	7718	9542	4967	4289	5273	1488	1120	1334
PF3D7_0215700	RPB2	DNA-directed RNA polymerase II subunit RPB2, putative	13092	13865	10954	13097	4207	1420	6170	5565
PF3D7_0215800	ORC5	origin recognition complex subunit 5	7792	8519	5604	5869	3120	891	793	881
PF3D7_0215900	DHHC11	palmitoyltransferase DHHC11, putative	335	370	218	384	466	144	808	525
PF3D7_0216000		DEAD/DEAH box helicase, putative	1896	2706	1189	1105	2791	772	667	754
PF3D7_0216100		conserved Plasmodium protein, unknown function	9463	14004	5561	5100	4808	1298	733	884
PF3D7_0216200		Alba domain-containing protein, putative	4006	5318	2955	3400	987	297	709	753
PF3D7_0216300		conserved Plasmodium protein, unknown function	5337	5607	3838	4307	1117	302	303	308
PF3D7_0216400	VPS45	vacuolar protein sorting-associated protein 45	8220	9195	5191	5689	5434	1645	1206	1473
PF3D7_0216500		conserved Plasmodium protein, unknown function	4246	6056	2678	2659	6985	1838	1153	1589
PF3D7_0216600		sugar transporter, putative	2507	2761	2109	2393	13842	4264	6220	7416
PF3D7_0216700	ATG11	autophagy-related protein 11, putative	21168	32257	15192	17313	92471	19997	14894	23547
PF3D7_0216700.2			22907	35418	16357	19190	97141	20771	16295	25411
PF3D7_0216800		TMEM121 domain-containing protein, putative	2037	2261	1488	1486	9149	2926	4205	4419
PF3D7_0216900		conserved Plasmodium protein, unknown function	411	681	404	442	693	215	231	241
PF3D7_0217000		conserved Plasmodium membrane protein, unknown function	946	1118	704	659	1211	414	313	444
PF3D7_0217100		ATP synthase subunit alpha, mitochondrial	20921	27242	16984	15286	11162	4340	7124	7595
PF3D7_0217200		conserved Plasmodium protein, unknown function	4145	6315	2161	2517	2863	1167	590	765
PF3D7_0217300	AP2S	AP-2 complex subunit sigma, putative	2380	2386	1607	1966	7278	2663	6810	6522
PF3D7_0217400		conserved protein, unknown function	4335	4411	3199	4407	3185	872	3080	2931
PF3D7_0217500	CDPK1	calcium-dependent protein kinase 1	12066	30355	4957	3419	88503	32137	62480	61918
PF3D7_0217600		conserved Plasmodium protein, unknown function	7972	11027	6372	6733	8060	2987	3232	3832
PF3D7_0217700		E2F-associated phosphoprotein, putative	1757	2058	1388	1689	581	222	244	261
PF3D7_0217800	RPS26	40S ribosomal protein S26	61394	69325	38524	36800	15609	5395	7442	8554
PF3D7_0217900		thioesterase/thiol ester dehydrase-isomerase, putative	10732	11129	8321	10112	5008	1667	3314	3137
PF3D7_0218000	RFC2	replication factor C subunit 2, putative	6076	6375	4817	7001	2870	974	2014	1806
PF3D7_0218100		conserved protein, unknown function	2782	3378	1877	1826	6957	2448	2670	3076
PF3D7_0218200		SUZ domain-containing protein, putative	16633	22771	10306	10194	11908	2745	2212	2633
PF3D7_0218300		rRNA methyltransferase, putative	9855	10311	6896	7640	7923	2697	4310	4686
PF3D7_0218400	DDX47	ATP-dependent RNA helicase DDX47, putative	4210	5288	3560	4223	1375	498	499	491
PF3D7_0218500	SNRPD2	small nuclear ribonucleoprotein Sm D2, putative	7587	9705	5746	7198	3076	993	1901	1685
PF3D7_0218600		patatin-like phospholipase, putative	21151	33196	15939	17130	12054	2917	2754	3087
PF3D7_0218700	PRP45	pre-mRNA-processing protein 45, putative	14051	18507	10230	9487	10257	2604	2629	3150
PF3D7_0218800		ribonuclease P	3472	4731	2437	2609	1762	718	1235	1253
PF3D7_0218900		Plasmodium RNA of unknown function RUF2	537	705	333	265	291	98	141	283
PF3D7_0219000		small nucleolar RNA snoR01	431	808	183	86	410	120	82	221
PF3D7_0219100		saccharopine dehydrogenase, putative	1327	1456	1113	1385	244	63	357	300
PF3D7_0219200	RPS30	40S ribosomal protein S30	44046	40534	30787	41050	12063	4518	15688	14195
PF3D7_0219300		conserved Plasmodium protein, unknown function	3445	4306	2810	2145	3429	1197	1954	2241
PF3D7_0219400		ribosome associated membrane protein RAMP4, putative	11268	11048	7346	9599	11150	3557	16267	15720
PF3D7_0219500		pseudouridine synthase, putative	5326	6456	3945	4246	3450	1241	2038	2067
PF3D7_0219600	RFC1	replication factor C subunit 1	14018	15680	9688	11929	7359	2178	1789	2074
PF3D7_0219700	GEXP20	Plasmodium exported protein (PHISTc), unknown function	1071	1266	726	769	8018	2359	2004	2019
PF3D7_0219800		Plasmodium exported protein (PHISTc), unknown function	2825	3344	1824	2185	13325	4059	3170	3801
PF3D7_0219900		Plasmodium exported protein, unknown function	766	807	898	937	5738	1869	3392	3591
PF3D7_0220000	LSA3	liver stage antigen 3	26250	30183	20673	28121	78959	18071	28658	33477
PF3D7_0220100		DnaJ protein, putative	3544	4566	3331	4038	4811	1202	1860	1802
PF3D7_0220200		Plasmodium exported protein, unknown function	44757	51595	35840	35794	18857	5055	7054	8320
PF3D7_0220300		Plasmodium exported protein, unknown function	2187	4091	1913	1584	1381	613	429	621
PF3D7_0220400		DnaJ protein, putative, pseudogene	291	307	208	189	3034	965	469	595
PF3D7_0220500		Plasmodium exported protein (hyp2), unknown function	275	416	181	193	15287	3802	4360	5215
PF3D7_0220600		Plasmodium exported protein (hyp9), unknown function	3086	3326	2817	3330	2772	965	1116	1278
PF3D7_0220700		Plasmodium exported protein (hyp9), unknown function	1008	1600	872	1213	1574	496	726	679
PF3D7_0220800	CLAG2	cytoadherence linked asexual protein 2	1339	1322	1197	1696	27146	6230	22462	20087
PF3D7_0220900		Plasmodium exported protein, unknown function, pseudogene	8	4	0	7	4	5	0	2
PF3D7_0221000		Plasmodium exported protein, unknown function	12	30	7	2	22	9	25	16
PF3D7_0221100		Plasmodium exported protein, unknown function, pseudogene	92	76	70	74	24	20	24	18
PF3D7_0221200		Plasmodium exported protein (hyp15), unknown function	4561	4472	3712	4911	527	264	336	369
PF3D7_0221300		Plasmodium exported protein, unknown function, pseudogene	3	1	8	3	10	19	6	11
PF3D7_0221400		stevor	11	14	2	9	4	8	0	8
PF3D7_0221500		Pfmc-2TM Maurer's cleft two transmembrane protein, pseudogene	71	31	31	66	14	9	3	10
PF3D7_0221600		Plasmodium exported protein, unknown function, pseudogene	2	5	0	4	4	10	8	4
PF3D7_0221650		Plasmodium exported protein, unknown function, pseudogene	11	9	0	1	12	0	1	3
PF3D7_0221700		Plasmodium exported protein, unknown function	700	890	455	671	1648	436	369	513
PF3D7_0221800		hypothetical protein	334	358	207	404	195	63	50	112
PF3D7_0221900		erythrocyte membrane protein 1 (PfEMP1), pseudogene	14	30	10	15	25	11	20	16
PF3D7_0222000	EPF1	exported protein family 1	0	3	0	0	0	0	0	0
PF3D7_0222100	MC-2TM	Pfmc-2TM Maurer's cleft two transmembrane protein	97	110	100	107	26	28	39	31
PF3D7_0222200	EPF3	exported protein family 3	0	0	0	2	0	0	0	0
PF3D7_0222300	EPF4	exported protein family 4, pseudogene	2	1	0	5	4	0	0	7
PF3D7_0222400	RIF	rifin, pseudogene	5	0	4	4	12	0	4	4
PF3D7_0222500	RIF	rifin	2	21	6	20	4	8	0	6
PF3D7_0222600	RIF	rifin	7	11	11	9	12	9	4	4
PF3D7_0222700	RIF	rifin	7	12	8	3	14	4	2	0
PF3D7_0222800		stevor	6	7	8	3	8	5	4	2
PF3D7_0222900	VAR	erythrocyte membrane protein 1 (PfEMP1), exon 2, pseudogene	4	5	0	0	3	10	6	2
PF3D7_0223100	RIF	rifin	55	62	22	102	13	4	17	13
PF3D7_0223200	RIF	rifin	0	2	2	6	17	14	0	6
PF3D7_0223300		erythrocyte membrane protein 1 (PfEMP1), exon 2	5	13	0	0	4	0	0	2
PF3D7_0223400	RIF	rifin	36	14	18	24	46	14	25	31
PF3D7_0223500	VAR	erythrocyte membrane protein 1, PfEMP1	212	188	188	208	388	131	409	430
PF3D7_0300100	VAR	erythrocyte membrane protein 1, PfEMP1	1984	2444	1582	1917	5020	1327	5181	5666
PF3D7_0300200	RIF	rifin	26	16	26	4	16	14	27	54
PF3D7_0300300	VAR	erythrocyte membrane protein 1 (PfEMP1), exon 2, pseudogene	0	5	0	2	6	0	2	0
PF3D7_0300400		stevor	8	12	0	2	13	1	1	0
PF3D7_0300500	RIF	rifin	4	4	10	10	9	5	1	14
PF3D7_0300600		Plasmodium exported protein, unknown function, fragment	0	0	0	0	0	0	0	0
PF3D7_0300700	RIF	rifin	3	21	8	5	12	14	6	4
PF3D7_0300800	RIF	rifin	4	6	10	2	34	6	8	6
PF3D7_0300900		stevor	259	272	248	197	41	23	6	24
PF3D7_0301000	ACS2	acyl-CoA synthetase	24	16	19	4	52	34	8	12
PF3D7_0301100		Plasmodium exported protein (hyp13), unknown function	6	3	2	1	27	13	14	7
PF3D7_0301200	FIKK3	serine/threonine protein kinase, FIKK family	84	94	92	62	1229	383	680	717
PF3D7_0301300	EH1	epoxide hydrolase 1	740	775	633	820	2850	739	1824	1714
PF3D7_0301400		Plasmodium exported protein, unknown function	569	741	480	789	164	61	113	83
PF3D7_0301500		Plasmodium exported protein, unknown function	2158	2089	1742	1886	1245	453	714	592
PF3D7_0301600	GEXP21	Plasmodium exported protein (hyp1), unknown function	7948	8501	6117	8615	5171	1267	2034	2087
PF3D7_0301700		Plasmodium exported protein, unknown function	22867	27226	14284	17338	5686	1714	3878	4632
PF3D7_0301800		Plasmodium exported protein, unknown function	658	642	1003	947	33618	8980	21710	25584
PF3D7_0301900		conserved protein, unknown function	2364	2263	2207	2303	983	748	1428	1720
PF3D7_0302000	PRP46	pre-mRNA-splicing factor PRP46, putative	7967	8976	5643	6105	4009	1388	1313	1466
PF3D7_0302100	SRPK1	serine/threonine protein kinase	21174	27061	14227	19013	5861	1591	1234	1499
PF3D7_0302200	CLAG3.2	cytoadherence linked asexual protein 3.2	176	227	206	209	3558	1189	3618	3119
PF3D7_0302300		erythrocyte membrane protein 1 (PfEMP1), pseudogene	564	616	398	694	936	315	369	451
PF3D7_0302400		non-coding RNA	7	21	17	4	35	20	16	11
PF3D7_0302500	CLAG3.1	cytoadherence linked asexual protein 3.1	6437	9248	5828	5575	148532	47740	87627	92014
PF3D7_0302600	ABCB4	ABC transporter B family member 4, putative	6194	7811	4291	5580	2700	656	683	869
PF3D7_0302700		CDGSH iron-sulfur domain-containing protein, putative	722	793	597	853	522	191	403	327
PF3D7_0302800		RNA-binding protein, putative	2941	3688	2033	2204	5274	1596	1040	1201
PF3D7_0302900		exportin-1, putative	29243	31780	24255	26893	18944	5473	6187	6056
PF3D7_0303000	NSF	N-ethylmaleimide-sensitive fusion protein	1658	1398	887	1056	1190	382	304	513
PF3D7_0303100		CLP1 P-loop domain-containing protein, putative	1079	1139	711	1110	3725	1155	1459	1310
PF3D7_0303200		lipin, putative	10492	16358	8636	9095	41826	9516	12153	14246
PF3D7_0303300	RPB6	DNA-directed RNA polymerases I, II, and III subunit RPABC2, putative	9905	11155	7408	6433	4517	1437	2572	3198
PF3D7_0303400	DHHC1	palmitoyltransferase DHHC1	3860	4247	2545	3063	10625	3229	5917	5413
PF3D7_0303500		spindle pole body protein, putative	14926	24980	9807	10552	9825	2182	1761	2349
PF3D7_0303600	Plrx	plasmoredoxin	2638	2817	1701	1859	476	156	168	193
PF3D7_0303700	BCKDH-E2	lipoamide acyltransferase component of branched-chain alpha-keto acid dehydrogenase complex	9990	10637	7230	8579	5096	1615	3210	3079
PF3D7_0303800		IBR domain protein, putative	5612	6073	2716	3614	3260	1106	646	830
PF3D7_0303900		phosphatidylethanolamine-binding protein, putative	166	87	87	80	299	65	292	334
PF3D7_0304000	IMC1a	inner membrane complex protein 1a, putative	233	273	99	178	426	76	115	177
PF3D7_0304100	IMC1e	inner membrane complex protein 1e, putative	165	340	177	191	33645	9353	7866	10106
PF3D7_0304200	EHD	EH domain-containing protein	11024	18876	7527	7262	30037	9493	15565	17501
PF3D7_0304300		conserved Plasmodium protein, unknown function	2969	3365	1226	2383	1824	458	457	485
PF3D7_0304400	RPL44	60S ribosomal protein L44	117435	145095	112845	68533	35472	11768	14797	18188
PF3D7_0304500	GLP1	1-cys-glutaredoxin-like protein-1	10976	12720	8086	7802	2310	723	744	888
PF3D7_0304600	CSP	circumsporozoite (CS) protein	1790	2390	1689	1893	743	208	340	306
PF3D7_0304700		conserved Plasmodium protein, unknown function	695	938	468	460	249	65	115	90
PF3D7_0304800		conserved Plasmodium membrane protein, unknown function	2791	3710	1455	1948	1861	398	440	550
PF3D7_0304900		conserved protein, unknown function	3085	3374	2330	2051	1695	566	546	521
PF3D7_0305000	EF-Ts	elongation factor Ts	5324	5076	4087	4606	2923	872	1537	1591
PF3D7_0305100		conserved Plasmodium protein, unknown function	10613	16625	7118	9431	5494	1667	1026	1373
PF3D7_0305200		GRIP domain-containing protein, putative	14648	19066	8425	10967	47971	12972	8424	10700
PF3D7_0305300		transporter, putative	13680	17652	10632	12119	20366	6193	4589	5351
PF3D7_0305400		conserved protein, unknown function	3185	3716	2289	2084	4083	1618	2464	2758
PF3D7_0305500		protein dopey homolog, putative	26250	33289	14258	21744	43892	11215	9176	12588
PF3D7_0305600	APE1	DNA-(apurinic or apyrimidinic site) endonuclease	16390	16757	12265	13735	17019	4288	10534	10378
PF3D7_0305700		ubiquitin-conjugating enzyme MMS2, putative	11320	11927	8786	8513	12384	3442	13215	14399
PF3D7_0305800		P-loop containing nucleoside triphosphate hydrolase, putative	118	111	31	60	214	86	81	100
PF3D7_0305900		conserved Plasmodium protein, unknown function	646	861	443	494	754	289	460	502
PF3D7_0306000	QCR8	cytochrome b-c1 complex subunit 8, putative	1411	1438	999	1225	1899	544	2174	2317
PF3D7_0306100		conserved Plasmodium protein, unknown function	7918	11638	5883	6383	4707	1428	1523	1713
PF3D7_0306200	AHA1	activator of Hsp90 ATPase	18550	21430	15143	15508	3324	1347	1785	1858
PF3D7_0306300	GRX1	glutaredoxin 1	35227	39976	32032	42717	6512	2791	9570	9023
PF3D7_0306400		FAD-dependent glycerol-3-phosphate dehydrogenase, putative	7509	7176	5595	6967	7082	2162	5960	5855
PF3D7_0306500	COX6C	cytochrome c oxidase subunit 6c, putative	6432	7188	4555	4159	7375	1994	4286	5141
PF3D7_0306600	ATPTG17	ATP synthase-associated protein, putative	6425	6980	4955	4846	5986	1626	3145	3483
PF3D7_0306700	EMC5	ER membrane protein complex subunit 5, putative	6726	7624	5155	5641	2350	689	2000	2459
PF3D7_0306800	CCT2	T-complex protein 1 subunit beta	21731	23526	19878	22834	3120	836	2460	2558
PF3D7_0306900		40S ribosomal protein S23, putative	79010	85772	73061	70280	21520	5779	22100	22823
PF3D7_0307000		small nucleolar RNA snoR03	56	33	33	83	11	7	28	38
PF3D7_0307100	RPS12	40S ribosomal protein S12, putative	37740	38690	31059	41435	7321	2588	9955	7769
PF3D7_0307200		60S ribosomal protein L7, putative	162871	185288	131040	118920	48445	12975	18379	21173
PF3D7_0307300	EB1	microtubule-associated protein RP/EB family, putative	27	22	8	20	619	125	206	236
PF3D7_0307400	ClpP	ATP-dependent Clp protease proteolytic subunit	6090	7633	4423	4955	5270	1773	4067	4011
PF3D7_0307500	SKA2	spindle and kinetochore-associated protein 2, putative	5915	7445	4718	6001	3765	1234	1532	1586
PF3D7_0307600		conserved Plasmodium protein, unknown function	6923	8358	4541	6566	5760	1632	1490	1527
PF3D7_0307700		conserved Plasmodium protein, unknown function	28298	32627	21025	26351	49879	13103	19745	21208
PF3D7_0307800		PDZ domain-containing protein, putative	5629	6303	3902	4536	3726	1140	1489	1567
PF3D7_0307900		conserved Plasmodium protein, unknown function	5832	7337	2957	3371	987	345	186	226
PF3D7_0308000		DNA polymerase delta small subunit, putative	9694	14269	6127	6085	2988	1024	592	828
PF3D7_0308100		zinc finger protein, putative	5680	6619	3178	3239	40188	11310	7726	8905
PF3D7_0308200	CCT7	T-complex protein 1 subunit eta	21419	23677	19664	21633	11690	3797	8206	8743
PF3D7_0308300	PIC4	PhIL1-interacting candidate PIC4	233	323	104	153	15152	5592	8586	9973
PF3D7_0308400		U4 spliceosomal RNA	0	8	0	1	4	10	35	14
PF3D7_0308500		activator of Hsp90 ATPase, putative	26739	36980	23651	19515	5318	1913	1705	2119
PF3D7_0308600	PRPF19	pre-mRNA-processing factor 19, putative	10057	12240	7226	7704	3772	1122	1118	1306
PF3D7_0308700		conserved protein, unknown function	292	293	231	232	8864	2099	4548	4992
PF3D7_0308800		conserved protein, unknown function	9753	10975	6836	4604	22365	7050	5543	7670
PF3D7_0308900	SF3B1	splicing factor 3B subunit 1, putative	7478	13884	6914	6878	4082	1221	1237	1210
PF3D7_0309000	YVH1	dual specificity protein phosphatase	10984	12585	7156	7744	5754	1814	1482	1508
PF3D7_0309100	OMD	OMD protein, putative	1501	1938	814	555	2509	774	318	376
PF3D7_0309200	ARK2	serine/threonine protein kinase ARK2, putative	16680	27297	11707	11720	17574	3821	3672	4600
PF3D7_0309300		N2227-like protein, putative	3183	3209	2792	3668	2718	1939	4345	4478
PF3D7_0309400		small nucleolar RNA Me18S-Um1356	14	23	16	0	21	2	10	10
PF3D7_0309500	AS	asparagine synthetase [glutamine-hydrolyzing], putative	28295	28334	21493	29763	15260	4376	22805	20598
PF3D7_0309600	PfP2	60S acidic ribosomal protein P2	97821	127350	91361	87824	26481	9863	23030	24046
PF3D7_0309700	SBP2	SECIS-binding protein 2, putative	5405	7344	3589	3694	3568	1071	1009	922
PF3D7_0309800	YTH2	YTH domain-containing protein 2	5114	5740	4004	3689	5094	1265	1864	1810
PF3D7_0309900		conserved Plasmodium protein, unknown function	3155	3284	2084	3054	1398	440	519	558
PF3D7_0310000		50S ribosomal protein L9, apicoplast, putative	3859	4859	3569	3750	1744	564	1325	1197
PF3D7_0310100	CDPK3	calcium-dependent protein kinase 3	140	145	96	80	252	90	71	87
PF3D7_0310200		phd finger protein, putative	15351	27628	12072	15188	19984	4867	4060	5850
PF3D7_0310300		phosphoglycerate mutase, putative	6636	7361	4738	6912	1646	401	701	775
PF3D7_0310400	PIESP1	parasite-infected erythrocyte surface protein	48866	65759	39978	38105	62441	15775	11159	13234
PF3D7_0310500	DHX57	ATP-dependent RNA helicase DHX57, putative	16169	19372	10138	11177	6651	2027	1485	1850
PF3D7_0310600	EIF3K	eukaryotic translation initiation factor 3 subunit K, putative	12501	12464	6584	7482	4266	1462	2692	2741
PF3D7_0310700	TRAPPC4	trafficking protein particle complex subunit 4, putative	2182	4659	1918	1944	1813	582	1973	2033
PF3D7_0310800		conserved Plasmodium protein, unknown function	4523	5125	3504	3813	3818	1310	3752	4037
PF3D7_0310900		conserved Plasmodium protein, unknown function	2501	3194	1763	2034	3298	1262	1185	1079
PF3D7_0311000		conserved Plasmodium protein, unknown function	16	13	0	12	26	21	21	16
PF3D7_0311100		pre-mRNA splicing factor, putative	8546	13525	7381	7112	3900	995	852	1087
PF3D7_0311200		valine--tRNA ligase, putative	3084	4727	2547	2707	1266	380	334	324
PF3D7_0311300		phosphatidylinositol 3- and 4-kinase, putative	16095	20703	13404	13963	28442	8175	14207	15032
PF3D7_0311400	PKRP	kinase-related protein PKRP, putative	240	398	201	167	2869	689	563	938
PF3D7_0311500		conserved protein, unknown function	1953	2114	1619	1668	2974	1022	2856	2873
PF3D7_0311600	OST1	dolichyl-diphosphooligosaccharide--protein glycosyltransferase subunit OST1, putative	8125	9032	5963	6063	4823	1411	1382	1590
PF3D7_0311700	PM6	plasmepsin VI	561	828	458	383	778	270	394	527
PF3D7_0311800		ATP synthase F0 subunit d-like protein, putative	10162	12018	7018	6666	7857	2338	2792	3016
PF3D7_0311900		heptatricopeptide repeat-containing protein, putative	2582	3370	1767	1879	1634	564	500	593
PF3D7_0312000		conserved protein, unknown function	3095	3499	2349	2634	525	184	732	746
PF3D7_0312100		E3 ubiquitin-protein ligase	5354	7504	4115	4061	4074	1252	2474	2202
PF3D7_0312200		tetratricopeptide repeat protein, putative	356	904	519	522	642	283	356	310
PF3D7_0312300	RPN12	26S proteasome regulatory subunit RPN12, putative	8515	8916	6292	6942	6479	2170	3783	3369
PF3D7_0312400	GSK3	glycogen synthase kinase 3	25901	32372	23611	26875	17629	5772	22485	21952
PF3D7_0312500	MFR3	multidrug-resistant modulator MFR3	1140	1639	1134	1396	371	164	357	333
PF3D7_0312600		tRNA Valine	16	32	19	32	11	3	11	0
PF3D7_0312700		tRNA Isoleucine	2	8	0	2	2	2	0	2
PF3D7_0312800		60S ribosomal protein L26, putative	102542	113730	88112	88858	31432	9338	22554	25345
PF3D7_0312900		hypothetical protein	367	442	111	121	397	121	110	121
PF3D7_0313000		conserved Plasmodium protein, unknown function	5304	5186	2752	3081	3685	1182	1253	1263
PF3D7_0313100	HRD3	ubiquitin-protein ligase, putative	27010	31877	23223	23521	8128	2375	5015	4736
PF3D7_0313200		conserved protein, unknown function	4771	6016	3573	3676	1777	627	766	750
PF3D7_0313300		YGGT family protein, putative	1485	1365	1018	1978	413	131	421	337
PF3D7_0313400		conserved Plasmodium protein, unknown function	4139	6906	3500	3220	1181	282	302	345
PF3D7_0313500	PfG	Ras-like G protein	2312	2599	1626	2149	766	241	353	347
PF3D7_0313600		conserved Plasmodium protein, unknown function	14794	20196	10871	10782	8794	2638	1772	2073
PF3D7_0313700		conserved Plasmodium protein, unknown function	3795	4126	3378	4645	1302	432	1674	1905
PF3D7_0313800		conserved Plasmodium protein, unknown function	8597	9386	6263	8431	3550	1004	1242	1252
PF3D7_0313900		conserved Plasmodium protein, unknown function	1982	2131	1383	1463	820	311	176	211
PF3D7_0314000		HSP20-like chaperone, putative	7933	9346	6330	7102	10424	4111	10054	9489
PF3D7_0314100		vesicle transport v-SNARE protein, putative	3994	4991	3278	3055	17399	5712	15452	17031
PF3D7_0314100.2			179	313	157	168	471	155	376	480
PF3D7_0314200		conserved Plasmodium protein, unknown function	7316	9819	3522	4845	4134	996	558	737
PF3D7_0314300	DER1-2	DER1-like protein	534	565	433	487	143	40	78	164
PF3D7_0314400	PPP6	serine/threonine protein phosphatase 6, putative	1957	2159	1754	2097	635	165	530	531
PF3D7_0314500		conserved Plasmodium protein, unknown function	5278	6526	4049	4079	1933	601	777	881
PF3D7_0314600		conserved protein, unknown function	5829	8778	4502	3844	4312	1201	1015	1169
PF3D7_0314700	RNF1	RING finger protein RNF1	2262	3844	2322	2591	494	153	277	268
PF3D7_0314800		conserved Plasmodium protein, unknown function	970	1308	636	533	5690	1612	1226	1461
PF3D7_0314900		conserved Plasmodium membrane protein, unknown function	1339	1361	984	1245	2464	749	1777	1570
PF3D7_0315000		zinc finger protein, putative	2091	2322	1394	1736	808	300	358	415
PF3D7_0315100	eIF4E	eukaryotic translation initiation factor 4E	2159	2435	1583	2217	902	273	1168	1079
PF3D7_0315200	CTRP	circumsporozoite- and TRAP-related protein	45	76	34	37	418	160	204	238
PF3D7_0315300		conserved Plasmodium protein, unknown function	3010	3870	1901	2333	1211	380	279	399
PF3D7_0315400		conserved Plasmodium protein, unknown function	7744	7817	5137	7309	3042	1360	3175	2307
PF3D7_0315500		ribosomal protein L47, mitochondrial, putative	6786	7691	4703	4249	2640	859	1095	1238
PF3D7_0315600		zinc finger protein, putative	475	717	423	365	449	129	175	194
PF3D7_0315700		conserved Plasmodium membrane protein, unknown function	1119	1513	503	423	632	218	145	132
PF3D7_0315800		zinc finger protein, putative	7188	9299	5138	4528	3818	1049	1031	1136
PF3D7_0315900		conserved Plasmodium protein, unknown function	34	14	9	20	1325	520	690	762
PF3D7_0316000	MA	microneme associated antigen	979	1221	1026	1196	12354	3587	5591	6620
PF3D7_0316100		ribosomal protein L27, mitochondrial, putative	2689	4932	2639	2307	6884	1927	3248	3483
PF3D7_0316200		conserved Plasmodium protein, unknown function	18787	28745	11461	12564	16181	4427	2843	3592
PF3D7_0316300	PPase	inorganic pyrophosphatase, putative	40655	44396	28017	32347	33517	12365	15145	14819
PF3D7_0316300.2			46751	49962	33787	37749	39881	13842	18469	18365
PF3D7_0316400		CS domain-containing protein, putative	8387	15278	9178	8734	3034	948	986	1121
PF3D7_0316500	NUF2	kinetochore protein NUF2, putative	13715	17137	10124	10164	11093	3349	3524	4001
PF3D7_0316600	FNT	formate-nitrite transporter	52594	60042	43365	50717	14765	4472	12858	12224
PF3D7_0316700	YOP1	protein YOP1, putative	4492	4713	3420	4455	3375	954	5129	5227
PF3D7_0316800		40S ribosomal protein S15A, putative	60419	66728	54822	62609	21842	6886	29095	28315
PF3D7_0316900		E3 ubiquitin-protein ligase, putative	9173	10992	6421	7890	17493	5464	8152	8908
PF3D7_0317000		proteasome subunit alpha type-3, putative	29649	32564	20431	24030	16020	5108	12244	11293
PF3D7_0317100	B9	6-cysteine protein	362	459	231	310	655	193	155	242
PF3D7_0317200	CRK4	cdc2-related protein kinase 4	22170	26630	17268	21102	41910	11526	12219	13533
PF3D7_0317300		conserved Plasmodium protein, unknown function	14284	17704	8196	10573	26116	6913	4301	6028
PF3D7_0317400		DNA replication complex GINS protein, putative	362	617	355	288	400	125	206	310
PF3D7_0317500	EG5	kinesin-5	3868	4564	1980	2958	3742	890	1022	1176
PF3D7_0317600	RPS11	40S ribosomal protein S11, putative	60775	70442	51917	67729	12960	3682	14137	12845
PF3D7_0317700		CPSF (cleavage and polyadenylation specific factor), subunit A, putative	27098	39650	21036	22845	10737	2908	2763	2994
PF3D7_0317800		26S proteasome non-ATPase regulatory subunit 9, putative	27967	38428	20207	17869	7755	2267	1941	2250
PF3D7_0317900		conserved protein, unknown function	3839	4461	2609	2848	1112	332	324	343
PF3D7_0318000		conserved Plasmodium protein, unknown function	49	54	28	24	41	17	29	33
PF3D7_0318100	STOML	stomatin-like protein, putative	2231	2196	1891	2571	387	213	491	389
PF3D7_0318200	RPB1	DNA-directed RNA polymerase II subunit RPB1	37584	46605	31413	34272	21759	5942	7217	7658
PF3D7_0318300		conserved Plasmodium protein, unknown function	4787	7826	4123	4065	4258	1103	1056	961
PF3D7_0318400		coiled-coil domain-containing protein CCDC148/CCDC112, putative	356	295	285	219	705	241	189	260
PF3D7_0318500		conserved Plasmodium protein, unknown function	610	940	535	458	23067	5542	4749	7295
PF3D7_0318600		cleavage and polyadenylation specificity factor, putative	3406	4720	2181	2288	9107	2718	2378	2779
PF3D7_0318700		conserved Plasmodium protein, unknown function	18	57	13	21	2921	979	3267	2747
PF3D7_0318800		triosephosphate isomerase, putative	104	130	58	30	2716	902	1013	1089
PF3D7_0318900		conserved protein, unknown function	18000	22827	13634	14385	13313	3908	3620	4342
PF3D7_0319000	ATPase7	P4-type ATPase ATP7, putative	14628	20496	11554	12006	20348	6395	4933	5370
PF3D7_0319100	RBX1	E3 ubiquitin-protein ligase RBX1, putative	13026	17182	9315	6988	7230	2716	5122	6462
PF3D7_0319200	CCR4-4	CCR4 domain-containing protein 4, putative	12410	16781	9609	10576	3977	968	802	1109
PF3D7_0319300		ubiquitin-conjugating enzyme E2, putative	3831	3759	2129	2609	1062	264	792	837
PF3D7_0319400		kinesin-8X	9507	12632	6765	8861	6197	3283	1953	2101
PF3D7_0319500		RNA-binding protein, putative	12959	15921	10819	12722	4396	1286	1379	1465
PF3D7_0319600	EF-1delta	elongation factor 1-delta, putative	22024	21791	17080	21944	4095	3817	8078	7344
PF3D7_0319700	ABCI3	ABC transporter I family member 1, putative	13081	18656	7952	10559	21152	6146	4022	5505
PF3D7_0319800		conserved Plasmodium protein, unknown function	876	1176	431	285	2283	715	237	346
PF3D7_0319900		conserved protein, unknown function	330	602	286	306	314	109	222	254
PF3D7_0320000	I2	protein phosphatase inhibitor 2	18869	21350	16298	17147	8242	3029	10421	10189
PF3D7_0320100	SEC22	protein transport protein SEC22	7089	7369	5253	7002	5351	1971	6000	5503
PF3D7_0320200		CPW-WPC family protein	341	493	254	279	150	37	67	72
PF3D7_0320300	CCT5	T-complex protein 1 subunit epsilon	46506	50674	36096	45524	8000	2559	7168	6216
PF3D7_0320400	Cap380	oocyst capsule protein Cap380	106	190	92	94	334	105	124	135
PF3D7_0320500	Nico	nicotinamidase, putative	21498	27751	17025	15255	40652	12784	23180	25997
PF3D7_0320600		conserved protein, unknown function	5418	6265	3537	3317	3979	1786	2299	2227
PF3D7_0320700	SPC25	signal peptidase complex subunit 2	21677	17141	13251	17769	13734	5646	10968	12279
PF3D7_0320800	DOZI	ATP-dependent RNA helicase DDX6	27320	30683	22679	26275	23089	5700	30863	31784
PF3D7_0320900	H2A.Z	histone H2A.Z	24289	27325	22598	32307	50799	16371	102341	80999
PF3D7_0321000		conserved protein, unknown function	7913	13773	8170	7591	3951	1015	1122	1353
PF3D7_0321100		conserved Plasmodium protein, unknown function	5961	9174	3560	3789	32519	8471	5648	7847
PF3D7_0321200	ALG7	UDP-N-acetylglucosamine--dolichyl-phosphate N-acetylglucosaminephosphotransferase, putative	2914	3478	2052	2337	5490	2010	2307	2647
PF3D7_0321300		conserved Plasmodium protein, unknown function	3702	4953	1734	2060	6918	1578	1107	1384
PF3D7_0321400	pPK1	pseudo protein kinase 1, putative	539	873	386	335	14900	5825	8270	8578
PF3D7_0321500		peptidase, putative	12888	14189	9505	13417	7074	2369	4174	3596
PF3D7_0321600	DDX42	ATP-dependent RNA helicase DDX42, putative	19509	23894	13867	15975	14403	4211	4707	4712
PF3D7_0321700		conserved Plasmodium protein, unknown function	20277	25747	11444	14839	29567	7138	5671	7182
PF3D7_0321800		WD repeat-containing protein, putative	9048	13591	6424	8003	14984	3821	3685	4410
PF3D7_0321900	CARL	cyclic amine resistance locus protein	22899	28431	12730	15948	11699	3748	4958	5059
PF3D7_0322000	CYP19A	peptidyl-prolyl cis-trans isomerase	107822	142043	93202	99084	21465	7853	11962	12066
PF3D7_0322100	Prt1	mRNA-capping enzyme subunit beta	12827	16066	8401	8346	5541	1519	1314	1393
PF3D7_0322200		conserved protein, unknown function	306	306	133	163	874	238	175	183
PF3D7_0322300	DGAT	diacylglycerol O-acyltransferase	10772	16485	9528	9434	9072	2319	4693	5086
PF3D7_0322400		regulator of initiation factor 2 (eIF2)	14970	22185	10695	8679	4664	1519	847	1009
PF3D7_0322500	IscA2	iron-sulfur assembly protein, putative	5236	5806	3091	3116	5650	1749	2382	2747
PF3D7_0322600		conserved Plasmodium protein, unknown function	155	225	98	155	220	80	68	94
PF3D7_0322700		conserved Plasmodium protein, unknown function	11062	12326	5557	8915	4991	1308	1432	1675
PF3D7_0322800		conserved Plasmodium protein, unknown function	20	38	33	14	16	7	6	15
PF3D7_0322900	RPS3A	40S ribosomal protein S3A, putative	77782	104804	71194	69995	22341	6843	9654	9317
PF3D7_0323000	TMA7	translation machinery-associated protein 7, putative	7105	8647	5537	6700	4284	1127	2214	1900
PF3D7_0323100		conserved Plasmodium protein, unknown function	11978	16778	9055	9509	6060	1521	1694	1814
PF3D7_0323200		conserved Plasmodium protein, unknown function	4881	5895	3628	4063	2127	799	931	1053
PF3D7_0323300		conserved protein, unknown function	670	693	387	408	1342	507	316	371
PF3D7_0323400	RIPR	Rh5 interacting protein	914	895	548	648	50496	14733	25677	25737
PF3D7_0323500	SMN	survival motor neuron-like protein	8018	10706	6180	5948	19659	5638	4438	5640
PF3D7_0323600		BSD domain-containing protein, putative	6706	7292	4001	4580	2456	943	582	688
PF3D7_0323700	SART1	U4/U6.U5 tri-snRNP-associated protein 1, putative	20283	30687	15116	14526	22787	5257	4660	6058
PF3D7_0323800		conserved Plasmodium protein, unknown function	10121	10304	6053	7487	6175	1427	1264	1632
PF3D7_0323900	VAR	erythrocyte membrane protein 1 (PfEMP1), exon 2, pseudogene	6	16	4	5	21	10	4	3
PF3D7_0324000	EPF1	exported protein family 1	0	1	0	0	0	0	0	0
PF3D7_0324100	MC-2TM	Pfmc-2TM Maurer's cleft two transmembrane protein	46	95	36	32	80	36	27	36
PF3D7_0324200	EPF3	exported protein family 3	3	8	0	1	2	2	2	0
PF3D7_0324300	EPF4	exported protein family 4	2	2	9	35	1	2	1	2
PF3D7_0324400	RIF	rifin	4	8	10	2	4	2	0	4
PF3D7_0324500	RIF	rifin	0	20	6	8	19	12	2	0
PF3D7_0324600		stevor	4	5	10	2	2	0	0	6
PF3D7_0324700	VAR	erythrocyte membrane protein 1 (PfEMP1), exon 2, pseudogene	6	0	0	0	0	0	2	2
PF3D7_0324800	RIF	rifin	4	13	5	6	14	4	7	19
PF3D7_0324900	VAR	erythrocyte membrane protein 1, PfEMP1	106	156	60	113	210	73	202	202
PF3D7_0400100	VAR	erythrocyte membrane protein 1, PfEMP1	3456	3937	2819	3380	7543	1815	5161	6212
PF3D7_0400200		erythrocyte membrane protein 1 (PfEMP1), exon 2, pseudogene	22070	25424	19122	19624	36918	8917	30983	36115
PF3D7_0400300	RIF	rifin	329	336	238	250	1153	410	1727	1705
PF3D7_0400400	VAR	erythrocyte membrane protein 1, PfEMP1	281	368	332	300	345	141	215	250
PF3D7_0400500	RIF	rifin	3	22	4	4	20	4	28	37
PF3D7_0400600		erythrocyte membrane protein 1 (PfEMP1), exon 1, pseudogene	0	4	0	0	0	1	0	0
PF3D7_0400700	RIF	rifin	0	12	33	8	23	17	18	7
PF3D7_0400800		stevor	1	2	8	4	13	18	10	6
PF3D7_0400900	RIF	rifin	30	55	19	8	11	6	2	5
PF3D7_0401000	RIF	rifin	4	14	14	5	8	8	10	2
PF3D7_0401100		Plasmodium exported protein, unknown function, fragment	0	0	0	0	0	0	0	0
PF3D7_0401200	RIF	rifin	5	8	10	2	16	2	10	12
PF3D7_0401300	RIF	rifin	10	26	6	6	7	4	10	2
PF3D7_0401400	RIF	rifin	2	12	0	7	14	18	5	14
PF3D7_0401500		stevor, pseudogene	20	36	26	18	37	9	10	14
PF3D7_0401600	RIF	rifin	13796	17213	12464	12737	3988	1192	2050	2496
PF3D7_0401600.2			13373	16784	12178	12524	3824	1131	1997	2436
PF3D7_0401700		Plasmodium exported protein, unknown function, pseudogene	10251	12199	8684	11477	1463	405	715	707
PF3D7_0401800	PfD80	Plasmodium exported protein (PHISTb), unknown function	2434	2720	2339	4152	9178	2207	3779	3700
PF3D7_0401900	ACS6	acyl-CoA synthetase	19	61	80	17	187	53	33	73
PF3D7_0402000		Plasmodium exported protein (PHISTa), unknown function	109120	142142	84125	94399	15991	4366	3409	3972
PF3D7_0402100		Plasmodium exported protein (PHISTb), unknown function	688	900	555	798	16994	5523	8054	7930
PF3D7_0402200	SURF4.1	surface-associated interspersed protein 4.1 (SURFIN 4.1), pseudogene	270	444	284	329	23821	5345	8573	11853
PF3D7_0402300	RH1	reticulocyte binding protein homologue 1	1340	2017	627	608	107110	24210	14828	22325
PF3D7_0402400	GEXP18	Plasmodium exported protein, unknown function	39037	46560	28586	25442	59281	14460	16190	19547
PF3D7_0402500	RIF	rifin, pseudogene	21	26	21	17	21	5	5	2
PF3D7_0402600		stevor	4	11	4	6	7	4	6	8
PF3D7_0402700	RIF	rifin, pseudogene	6	9	12	4	31	8	8	4
PF3D7_0402800		erythrocyte membrane protein 1 (PfEMP1), pseudogene	44	78	35	27	66	25	19	47
PF3D7_0402900		probable protein, unknown function	20	11	7	5	227	89	236	229
PF3D7_0403000		tRNA Asparagine	0	2	0	1	0	2	0	6
PF3D7_0403100		regulator of chromosome condensation, putative	3834	4301	2689	2784	2622	824	779	898
PF3D7_0403200		pre-mRNA splicing factor, putative	24301	35483	20426	18429	12560	3062	2968	3569
PF3D7_0403300		conserved Plasmodium protein, unknown function	7243	7356	4340	3832	3392	1242	1704	1759
PF3D7_0403400		conserved Plasmodium protein, unknown function	15109	22158	8616	11704	11202	2575	2005	2527
PF3D7_0403500		ubiquitin specific protease, putative	4318	4608	2545	2796	4309	1348	1083	1240
PF3D7_0403600		conserved Plasmodium protein, unknown function	5949	8498	3992	5557	4588	1339	1526	1781
PF3D7_0403700	CLF1	pre-mRNA-splicing factor CLF1, putative	18545	24738	14098	14845	8998	2878	2558	3029
PF3D7_0403800		alpha/beta hydrolase, putative	1588	2141	1042	959	14566	5108	6114	6284
PF3D7_0403900	SET8	SET domain protein, putative	1042	1670	1077	1184	4418	1313	1815	1981
PF3D7_0404000		conserved Plasmodium protein, unknown function	209	319	128	90	23556	9065	7206	8454
PF3D7_0404100	ApiAP2	AP2 domain transcription factor AP2-SP2, putative	234	226	123	123	786	231	229	227
PF3D7_0404200		conserved Plasmodium protein, unknown function	605	705	498	500	423	148	246	226
PF3D7_0404300		conserved Plasmodium protein, unknown function	14251	26663	15055	14501	8684	2321	2452	3279
PF3D7_0404400	P36	6-cysteine protein P36	647	1046	603	542	1178	399	693	838
PF3D7_0404500	P52	6-cysteine protein P52	165	197	136	131	293	123	140	156
PF3D7_0404600		conserved Plasmodium membrane protein, unknown function	17059	23374	8935	13081	13486	3596	2202	2779
PF3D7_0404700	DPAP3	dipeptidyl aminopeptidase 3	3984	4293	2146	2335	72008	18844	18713	22327
PF3D7_0404800		sporozoite-specific protein S10, putative	159	213	106	187	3150	1075	1577	1718
PF3D7_0404900	P41	6-cysteine protein P41	8926	11232	5885	5512	44531	13547	27466	31743
PF3D7_0405000	DDX51	ATP-dependent RNA helicase DDX51, putative	9778	11296	7175	6717	7596	2505	2594	2846
PF3D7_0405100	SEC24B	protein transport protein Sec24B, putative	12365	13232	9312	11426	16824	4241	7851	8351
PF3D7_0405200	CERLI2	protein CERLI2	6481	8250	4968	5008	40016	9616	14133	15992
PF3D7_0405300	LISP2	liver specific protein 2, putative	867	1215	437	292	6733	2905	991	1583
PF3D7_0405400	PRPF8	pre-mRNA-processing-splicing factor 8, putative	41867	56372	31634	34178	21760	6909	7955	8067
PF3D7_0405500		conserved Plasmodium protein, unknown function	6413	7215	3887	3968	1570	605	612	587
PF3D7_0405600		TMEM33 domain-containing protein, putative	17966	22277	11596	13209	5926	2150	1597	1622
PF3D7_0405700		lysine decarboxylase, putative	11058	13831	6639	6474	4551	1511	861	1027
PF3D7_0405800		conserved protein, unknown function	2540	2861	1610	1824	1215	417	1074	1149
PF3D7_0405900	ASP	apical sushi protein	3164	4199	2487	2107	119570	28845	31566	39207
PF3D7_0406000		conserved protein, unknown function	11032	12991	7409	6905	35663	11158	8593	10160
PF3D7_0406100		V-type proton ATPase subunit B	26862	33918	24111	27496	15309	4298	17886	18023
PF3D7_0406200	Pfs16	parasitophorous vacuole membrane protein S16	18290	26532	15062	15308	6787	3033	5348	5963
PF3D7_0406400	cGLO2	cytosolic glyoxalase II	1649	2344	1119	1259	3107	1067	2507	2841
PF3D7_0406500		NYN domain-containing protein, putative	37409	58470	27886	27808	68707	15822	10701	15831
PF3D7_0406600		conserved protein, unknown function	173	341	164	131	67	20	16	15
PF3D7_0406700		KLRAQ domain-containing protein, putative	11971	14588	7885	8092	11278	3305	3163	3557
PF3D7_0406800		ribosomal protein L25, putative	6634	8512	4849	4399	4102	1535	1789	2093
PF3D7_0406900		conserved Plasmodium protein, unknown function	145	199	139	88	206	93	86	67
PF3D7_0407000		conserved Plasmodium protein, unknown function	1213	1308	875	1207	530	159	219	228
PF3D7_0407100		methyltransferase, putative	6183	8750	4514	3304	3513	1097	1600	2057
PF3D7_0407200	PTH2	peptidyl-tRNA hydrolase 2, putative	7423	10065	5878	4004	5364	1694	3150	3899
PF3D7_0407300		transcription factor, putative	1439	1703	1100	1443	560	164	270	214
PF3D7_0407400		conserved Plasmodium protein, unknown function	5784	7234	3943	3282	1302	473	347	324
PF3D7_0407500		mitochondrial carrier protein, putative	603	867	646	807	86	24	72	79
PF3D7_0407600		conserved Plasmodium protein, unknown function	45	76	38	36	184	74	63	68
PF3D7_0407700		conserved Plasmodium protein, unknown function	6531	9527	4724	4700	50756	12676	11750	13633
PF3D7_0407800	CINCH	protein CINCH	3895	4202	2200	3151	48900	11189	12828	15177
PF3D7_0407900		AAA family ATPase, putative	3655	4934	2870	3218	50820	14445	12399	15460
PF3D7_0408000		conserved Plasmodium protein, unknown function	235	467	210	223	15216	4457	10413	10835
PF3D7_0408100		conserved Plasmodium protein, unknown function	1447	1909	1075	1422	7130	1643	1540	1953
PF3D7_0408200		conserved Plasmodium protein, unknown function	1285	1554	613	709	3651	1112	827	805
PF3D7_0408300	ZRANB2	zinc finger Ran-binding domain-containing protein 2, putative	5809	6861	4831	4603	6045	1718	2540	2816
PF3D7_0408400		conserved protein, unknown function	2653	2851	2188	2210	1154	427	473	551
PF3D7_0408500	FEN1	flap endonuclease 1	7926	8947	6858	7637	5698	1616	4613	4486
PF3D7_0408600	SIAP1	sporozoite invasion-associated protein 1	270	293	180	204	928	213	728	740
PF3D7_0408700	PLP1	perforin-like protein 1	66	59	52	52	93	41	92	84
PF3D7_0408800		conserved Plasmodium protein, unknown function	4	30	6	9	15	22	8	23
PF3D7_0408900	KAE1	tRNA N6-adenosine threonylcarbamoyltransferase	9233	10430	7398	8345	3334	1062	1081	1136
PF3D7_0408900.2			14139	16959	11692	13904	5105	1423	1870	1844
PF3D7_0409000		conserved Plasmodium protein, unknown function	2488	3259	1414	1562	2700	724	573	760
PF3D7_0409100	PRPF31	U4/U6 small nuclear ribonucleoprotein PRP31, putative	13437	16359	10935	11541	12860	3938	5514	6301
PF3D7_0409200	SOF1	protein SOF1, putative	13893	15716	10064	10619	11384	3489	5549	5706
PF3D7_0409300		methyltransferase, putative	5555	7319	3787	4642	1768	447	400	545
PF3D7_0409400	DnaJ	chaperone protein DnaJ	11654	13506	8495	8879	2554	575	719	846
PF3D7_0409500		NAD(P)-binding protein, putative	7402	8515	5534	5709	4763	1305	3035	3101
PF3D7_0409600	RPA1	replication protein A1, large subunit	17935	19860	12893	15779	18235	5219	6655	7610
PF3D7_0409700	RF2	peptide chain release factor 2	3398	4485	3064	2794	5377	1774	5286	7120
PF3D7_0409800		zinc finger protein, putative	21672	25360	14215	13286	58787	17041	13166	16544
PF3D7_0409900	ALP5b	actin-like protein, putative	2309	2736	1136	1087	8572	3538	2616	3136
PF3D7_0410000	EVP1	erythrocyte vesicle protein 1	2591	3308	1855	1853	40065	10836	10464	13802
PF3D7_0410100		tRNA Serine	6	15	6	1	57	26	57	49
PF3D7_0410200		tRNA Isoleucine	2	0	4	2	1	0	13	4
PF3D7_0410300	PPM1	protein phosphatase PPM1, putative	6724	7827	5304	5351	3507	1231	1750	1757
PF3D7_0410400	RRP4	exosome complex component RRP4	4643	5392	3234	3120	1800	555	734	778
PF3D7_0410500		conserved Plasmodium protein, unknown function	53	54	32	24	483	226	254	262
PF3D7_0410600	ATRP	armadillo-type repeat protein ATRP	7506	8808	6097	7062	12793	3817	5844	5876
PF3D7_0410700	RbgA	ribosome biogenesis GTPase A, putative	7477	10272	5050	5837	32814	8366	7317	9005
PF3D7_0410800		conserved Plasmodium protein, unknown function	16862	20772	12236	13491	56736	15031	16606	18946
PF3D7_0410900		conserved Plasmodium protein, unknown function	2935	3454	2289	2505	1280	410	365	455
PF3D7_0411000		conserved Plasmodium protein, unknown function	2741	3163	2265	2575	3125	759	759	900
PF3D7_0411100	MED8	mediator of RNA polymerase II transcription subunit 8, putative	1346	1255	958	962	453	164	182	226
PF3D7_0411200		PP-loop family protein, putative	2598	3606	1888	2306	674	188	152	190
PF3D7_0411300		conserved Plasmodium protein, unknown function	2621	2662	2051	2034	1097	260	284	371
PF3D7_0411400		DEAD box ATP-dependent RNA helicase, putative	12630	17699	7989	8463	1988	602	371	433
PF3D7_0411500		tRNA Alanine	3	0	0	0	4	0	0	0
PF3D7_0411600		tRNA Glutamic acid	2	1	6	11	3	2	3	0
PF3D7_0411700		conserved Plasmodium protein, unknown function	15	46	20	16	29	14	5	2
PF3D7_0411800		conserved Plasmodium protein, unknown function	6075	7264	3930	5148	5361	1519	1496	1573
PF3D7_0411900		DNA polymerase alpha catalytic subunit A	12497	15519	7437	11075	9998	2312	2406	2859
PF3D7_0412000		LITAF-like zinc finger protein, putative	17315	21696	11856	12282	15095	4214	3044	3209
PF3D7_0412100	mtRPS12	ribosomal protein S12, mitochondrial	4003	4090	2747	3065	1264	432	683	635
PF3D7_0412200		conserved Plasmodium protein, unknown function	887	999	750	818	355	106	215	216
PF3D7_0412300		phosphopantothenoylcysteine synthetase, putative	1059	1085	706	766	1065	299	266	384
PF3D7_0412400	VAR	erythrocyte membrane protein 1, PfEMP1	125	135	62	99	118	76	75	61
PF3D7_0412500		Plasmodium RNA of unknown function RUF6	0	2	0	0	1	0	0	1
PF3D7_0412600	RIF	rifin, pseudogene	9	6	1	2	6	5	14	2
PF3D7_0412700	VAR	erythrocyte membrane protein 1, PfEMP1	45	106	73	34	110	54	74	123
PF3D7_0412800		Plasmodium RNA of unknown function RUF6	0	0	0	0	0	0	0	0
PF3D7_0412900	VAR	erythrocyte membrane protein 1, PfEMP1	32	60	28	23	46	32	55	75
PF3D7_0413000		Plasmodium RNA of unknown function RUF6	0	0	0	0	0	0	0	0
PF3D7_0413100	VAR	erythrocyte membrane protein 1, PfEMP1	13	18	8	6	18	12	17	10
PF3D7_0413200	RIF	rifin	13	16	6	10	8	9	4	34
PF3D7_0413300	RIF	rifin	8	22	1	8	11	16	7	12
PF3D7_0413400	VAR	erythrocyte membrane protein 1 (PfEMP1), exon 1, pseudogene	41	44	40	21	86	49	110	131
PF3D7_0413500	PGM2	phosphoglucomutase-2	7833	8808	6588	6622	12344	3644	9385	9534
PF3D7_0413600	RPT3	26S protease regulatory subunit 6B, putative	16710	16419	13104	18056	14273	3682	24831	25083
PF3D7_0413700		lysine decarboxylase-like protein, putative	9751	9956	9141	12743	3945	1069	5753	5364
PF3D7_0413800		50S ribosomal protein L10, putative	1572	1808	936	1015	1218	518	649	646
PF3D7_0413900	USP13	ubiquitin carboxyl-terminal hydrolase 13, putative	13922	16367	10098	10955	10286	3230	2960	3417
PF3D7_0414000	SMC3	structural maintenance of chromosomes protein 3	45327	55547	27778	36169	20363	6135	3769	4033
PF3D7_0414100		conserved Plasmodium membrane protein, unknown function	2468	2321	1647	1951	1066	411	430	471
PF3D7_0414200		calmodulin-like protein	570	482	508	713	494	181	790	674
PF3D7_0414200.2			675	561	630	875	539	200	982	834
PF3D7_0414300		Rab5-interacting protein, putative	8290	8566	5558	7170	2317	996	2054	1731
PF3D7_0414400		conserved Plasmodium protein, unknown function	27	79	16	26	42	6	8	7
PF3D7_0414500		RNA-binding protein, putative	68	75	57	53	154	107	112	118
PF3D7_0414600	APH	acylated pleckstrin-homology domain-containing protein, putative	3003	3522	2500	2405	7582	2147	8736	10588
PF3D7_0414700		GTP-binding protein, putative	5002	5646	3614	4370	15480	4943	4943	5683
PF3D7_0414800		conserved Plasmodium protein, unknown function	208	196	156	161	22642	7952	8613	8520
PF3D7_0414900	ARO	armadillo-domain containing rhoptry protein	649	773	608	350	116658	43257	92710	112081
PF3D7_0415000	GET3	ATPase GET3	2968	3971	2267	2072	2118	1005	1126	989
PF3D7_0415100		conserved protein, unknown function	10056	13077	5717	5175	5630	2057	1071	1113
PF3D7_0415200		conserved Plasmodium protein, unknown function	15839	25149	10405	10073	8907	2846	1657	1934
PF3D7_0415300	CRK3	cdc2-related protein kinase 3	18957	27739	17772	17726	6343	1910	1944	2146
PF3D7_0415400		coatomer subunit zeta, putative	6186	7622	4832	4584	9411	2989	5396	6168
PF3D7_0415500	CBP20	nuclear cap-binding protein subunit 2, putative	10912	13382	7782	6381	9980	3256	1921	2425
PF3D7_0415600	GAK	GTP:AMP phosphotransferase	1444	1338	894	1538	351	128	230	197
PF3D7_0415700		conserved Plasmodium protein, unknown function	3935	4126	2210	2625	5789	1760	1227	1655
PF3D7_0415800		PhIL1-interacting candidate PIC3	970	958	646	713	9546	2969	3332	3662
PF3D7_0415900		60S ribosomal protein L15, putative	109740	158943	103725	95186	27997	7094	21891	24792
PF3D7_0416000		RNA-binding protein, putative	10123	13724	8945	11076	12566	3099	7880	8932
PF3D7_0416100	GATA	glutamyl-tRNA(Gln) amidotransferase subunit A	3545	4331	2383	3645	4746	1654	2111	2249
PF3D7_0416200		PRKR-interacting protein 1, putative	3182	4283	2538	2265	5725	1873	2001	2431
PF3D7_0416300	MCM9	DNA helicase MCM9, putative	2776	3908	2264	2605	3127	850	1039	1138
PF3D7_0416400	HAT1	histone acetyltransferase, putative	32794	40372	27152	29908	43762	12683	11029	13057
PF3D7_0416500	MAF1	repressor of RNA polymerase III transcription MAF1	6892	8732	4574	4462	11384	3780	2983	3559
PF3D7_0416600	PHBL	prohibitin-like protein PHBL, putative	8760	10452	5051	5039	3602	1265	1398	1429
PF3D7_0416700		CDGSH iron-sulfur domain-containing protein, putative	3274	4190	2771	3012	2177	937	2677	2782
PF3D7_0416800	SAR1	small GTP-binding protein sar1	22414	23623	19370	26375	10800	3531	23351	20551
PF3D7_0416900		conserved Plasmodium protein, unknown function	7196	12520	5499	5601	2693	795	572	889
PF3D7_0417000		conserved Plasmodium protein, unknown function	70	78	98	52	152	84	65	121
PF3D7_0417100	PUF2	mRNA-binding protein PUF2	45	23	28	37	55	31	54	19
PF3D7_0417200	DHFR-TS	bifunctional dihydrofolate reductase-thymidylate synthase	5160	6286	4784	6545	2211	670	1399	1397
PF3D7_0417300		LETM1-like protein, putative	17657	25287	13370	13086	8584	2300	2098	2296
PF3D7_0417400		conserved Plasmodium protein, unknown function	50359	78096	29975	38126	44576	10548	7360	11108
PF3D7_0417500		memo-like protein	30388	34307	19842	22706	17591	6585	15128	16219
PF3D7_0417600		conserved Plasmodium protein, unknown function	457	604	450	251	2127	482	800	725
PF3D7_0417700		conserved Plasmodium protein, unknown function	601	484	384	346	2149	508	985	1122
PF3D7_0417800	CRK1	cdc2-related protein kinase 1	10663	15696	9123	9456	5714	1636	1761	2041
PF3D7_0417900		conserved Plasmodium protein, unknown function	317	502	268	317	178	73	35	70
PF3D7_0418000		conserved Plasmodium protein, unknown function	4050	5964	2239	3058	5395	1547	918	1205
PF3D7_0418100	SOC1	protein SOC1, putative	6116	9182	3870	5152	2707	775	528	568
PF3D7_0418200	EIF3M	eukaryotic translation initiation factor 3 subunit M, putative	28963	35729	19156	21779	10395	3249	2499	2925
PF3D7_0418300		conserved Plasmodium protein, unknown function	83067	109573	67896	71070	150655	43130	36517	45810
PF3D7_0418400		LSM domain-containing protein, putative	1399	1799	1160	1361	591	239	527	521
PF3D7_0418500	BET3	trafficking protein particle complex subunit 3, putative	2376	3024	2179	2392	1660	781	983	960
PF3D7_0418600		regulator of chromosome condensation, putative	351	675	372	357	15681	4577	5830	7104
PF3D7_0418700		RNA-binding protein NOB1, putative	6887	8424	5154	6285	16931	5533	2784	3748
PF3D7_0418800		MOLO1 domain-containing protein, putative	18	26	12	9	214	52	69	73
PF3D7_0418900		conserved protein, unknown function	1765	1957	1432	1764	659	225	877	911
PF3D7_0419000		conserved Plasmodium protein, unknown function	1856	2065	1488	1403	1310	378	1214	1432
PF3D7_0419100		conserved Plasmodium protein, unknown function	715	842	642	804	396	150	324	348
PF3D7_0419200	GOT1	protein transport protein GOT1, putative	6370	8866	4326	3969	8292	2715	4302	5062
PF3D7_0419300		conserved Plasmodium protein, unknown function	10020	12865	7493	7133	12528	3802	7487	8536
PF3D7_0419400		conserved Plasmodium protein, unknown function	2061	2257	1316	1857	6961	2064	2239	2528
PF3D7_0419500		conserved Plasmodium membrane protein, unknown function	2334	3023	1211	1783	3411	816	849	1013
PF3D7_0419600	RANBP1	ran-specific GTPase-activating protein 1, putative	39635	49033	34051	34134	25064	7862	8564	9473
PF3D7_0419700	Pf34	apical merozoite protein	8041	10813	6016	5216	32618	11806	9881	10975
PF3D7_0419800		60S ribosomal protein L7ae/L30e, putative	8454	11690	6496	5510	11973	4610	3274	3702
PF3D7_0419900		phosphatidylinositol 4-kinase, putative	49965	72637	29652	34091	91682	22807	13142	19010
PF3D7_0420000		zinc finger protein, putative	27528	42149	18290	21880	25510	5577	4409	6371
PF3D7_0420100	RIO2	serine/threonine protein kinase RIO2	8340	10135	6528	7181	4328	1361	1743	2027
PF3D7_0420200	ACPS	holo-[acyl-carrier-protein] synthase, putative	642	1034	509	580	700	225	493	661
PF3D7_0420300	ApiAP2	AP2 domain transcription factor, putative	10084	15406	7562	9346	77305	19083	18427	24634
PF3D7_0420400	RRF2	ribosome-recycling factor	4333	4810	3408	2547	2372	733	769	1072
PF3D7_0420500		conserved Plasmodium protein, unknown function	698	791	455	286	4493	1541	1361	1826
PF3D7_0420600		conserved Plasmodium protein, unknown function	12400	15397	7286	6936	26848	7767	4345	5402
PF3D7_0420700	VAR	erythrocyte membrane protein 1, PfEMP1	66	93	58	52	35	34	38	35
PF3D7_0420800		Plasmodium RNA of unknown function RUF6	0	1	0	0	0	0	0	0
PF3D7_0420900	VAR	erythrocyte membrane protein 1, PfEMP1	1	13	4	2	2	0	2	5
PF3D7_0421000		Plasmodium RNA of unknown function RUF6	0	1	0	0	0	0	0	0
PF3D7_0421100	VAR	erythrocyte membrane protein 1, PfEMP1	3	16	15	10	19	7	18	18
PF3D7_0421200	RIF	rifin	0	6	0	2	0	0	0	0
PF3D7_0421300	VAR	erythrocyte membrane protein 1, PfEMP1	13	25	22	12	36	12	26	20
PF3D7_0421400		Plasmodium RNA of unknown function RUF6	1	3	0	0	3	1	2	0
PF3D7_0421500	RIF	rifin, pseudogene	17	8	6	10	10	2	4	17
PF3D7_0421600	VAR	erythrocyte membrane protein 1 (PfEMP1)-like pseudogene	26	10	4	11	26	19	6	10
PF3D7_0421700		conserved Plasmodium protein, unknown function	34	56	31	26	1457	405	284	307
PF3D7_0421800		conserved Plasmodium protein, unknown function	11	7	2	6	8	4	2	12
PF3D7_0421900		conserved Plasmodium protein, unknown function	0	7	0	2	59	56	78	68
PF3D7_0422000		steroid dehydrogenase, putative	4104	4091	2775	4225	1674	485	1114	1124
PF3D7_0422100		transmembrane emp24 domain-containing protein, putative	11430	12303	8133	9751	3575	1151	1710	1524
PF3D7_0422200		erythrocyte membrane-associated antigen	18263	29341	11277	14761	13416	3717	2322	3394
PF3D7_0422300		alpha tubulin 2	2208	2319	1825	2002	866	266	1347	1109
PF3D7_0422400	RPS19	40S ribosomal protein S19	59287	64501	53126	54231	17665	5032	17245	18183
PF3D7_0422500	BRR2	pre-mRNA-splicing helicase BRR2, putative	11249	14310	8954	12771	5203	1828	1688	1985
PF3D7_0422600		conserved Plasmodium protein, unknown function	1148	1231	750	677	389	163	217	200
PF3D7_0422700	EIF4A3	eukaryotic initiation factor 4A-III, putative	3883	5718	4203	4171	1082	300	825	922
PF3D7_0422800	SR12	serpentine receptor 12, putative	757	758	606	867	2210	925	1953	2130
PF3D7_0422900		methyltransferase, putative	1052	1332	780	565	3168	961	1270	1598
PF3D7_0423000		conserved Plasmodium protein, unknown function	3719	4151	2313	3021	5242	1757	2007	1899
PF3D7_0423100		AP-4 complex subunit sigma, putative	6971	9636	6529	6747	3547	1191	2880	2798
PF3D7_0423200		BSD-domain protein, putative	5923	6137	3707	3389	6928	2261	2410	2910
PF3D7_0423300		conserved Plasmodium protein, unknown function	2409	3198	1308	1205	74912	24024	15467	19366
PF3D7_0423400	AARP	apical asparagine-rich protein AARP	613	767	416	402	28055	8211	21995	24394
PF3D7_0423500	GAPM2	glideosome associated protein with multiple membrane spans 2	7671	8863	6252	6447	66696	18446	55093	62906
PF3D7_0423600		conserved Plasmodium protein, unknown function	17125	23422	12006	14241	12983	3459	3297	3984
PF3D7_0423700	ETRAMP4	early transcribed membrane protein 4	4604	6440	2774	2483	16044	9458	11159	11608
PF3D7_0423800	CyRPA	cysteine-rich protective antigen	1615	2109	1219	1260	35526	13876	26646	31504
PF3D7_0423900		probable protein, unknown function	105	99	109	106	8267	2872	8284	10426
PF3D7_0424000		Plasmodium exported protein (PHISTc), unknown function	4439	4698	3750	3989	2152	1032	713	732
PF3D7_0424100	RH5	reticulocyte binding protein homologue 5	352	431	302	236	21328	7350	7808	8131
PF3D7_0424200	RH4	reticulocyte binding protein homologue 4	407	470	196	262	59218	14219	8783	13543
PF3D7_0424300	EBA165	erythrocyte binding antigen-165, pseudogene	137	192	112	122	10232	3003	4771	5656
PF3D7_0424400	SURF4.2	surface-associated interspersed protein 4.2 (SURFIN 4.2)	68	98	76	76	206	70	96	128
PF3D7_0424500	FIKK4.1	serine/threonine protein kinase, FIKK family	667	763	596	705	7320	2501	2627	2739
PF3D7_0424600		Plasmodium exported protein (PHISTb)	5900	5447	4630	7173	20975	6816	38676	34204
PF3D7_0424700	FIKK4.2	serine/threonine protein kinase, FIKK family	1239	1769	1094	1471	1194	345	330	544
PF3D7_0424800		Plasmodium exported protein (PHISTb), unknown function	55	120	32	98	6190	1884	5029	4014
PF3D7_0424900		Plasmodium exported protein (PHISTa), unknown function	849	814	774	704	11363	2746	4825	5258
PF3D7_0425000		Plasmodium exported protein, unknown function, pseudogene	20	51	21	6	28	6	2	10
PF3D7_0425050		Plasmodium exported protein, unknown function, pseudogene	12	7	2	3	208	82	28	56
PF3D7_0425100		Plasmodium exported protein (hyp6), unknown function	14	21	4	2	1027	404	539	510
PF3D7_0425200		Plasmodium exported protein (hyp15), unknown function	21	11	6	9	828	289	374	419
PF3D7_0425250		Plasmodium exported protein (PHIST), unknown function, pseudogene	0	0	0	0	10	20	2	6
PF3D7_0425300		Plasmodium exported protein (PHISTa), unknown function, pseudogene	0	12	22	4	9	2	2	14
PF3D7_0425400		Plasmodium exported protein (PHISTa), unknown function	5	12	10	3	26	17	9	9
PF3D7_0425500		stevor	33	40	17	23	14	4	7	4
PF3D7_0425600	RIF	rifin, pseudogene	15	3	2	1	2	0	4	6
PF3D7_0425700	RIF	rifin	0	6	14	4	5	17	2	2
PF3D7_0425800	VAR	erythrocyte membrane protein 1, PfEMP1	91	118	41	40	79	54	51	49
PF3D7_0425900	RIF	rifin	7	15	16	6	20	12	56	55
PF3D7_0426000	VAR	erythrocyte membrane protein 1, PfEMP1	326	358	195	214	391	196	188	283
PF3D7_0500100	VAR	erythrocyte membrane protein 1, PfEMP1	1235	1801	1217	1581	2430	646	1477	1577
PF3D7_0500200		erythrocyte membrane protein 1 (PfEMP1), pseudogene	4	0	0	6	11	3	4	11
PF3D7_0500300	RIF	rifin, pseudogene	7	22	10	4	52	37	46	42
PF3D7_0500400	RIF	rifin	16	8	7	11	28	6	2	14
PF3D7_0500500	RIF	rifin	11	10	16	10	18	2	5	4
PF3D7_0500600		stevor, pseudogene	29	35	12	17	52	10	45	37
PF3D7_0500700	RIF	rifin, pseudogene	15	7	4	11	1	3	4	12
PF3D7_0500800	MESA	mature parasite-infected erythrocyte surface antigen	476913	794479	391034	436926	131699	22663	20995	31893
PF3D7_0500900	FIKK5	serine/threonine protein kinase, FIKK family	614	829	477	581	2827	683	1118	1254
PF3D7_0501000		Plasmodium exported protein, unknown function	44101	60501	35795	36501	6043	1741	2305	2440
PF3D7_0501100	HSP40	heat shock protein 40, type II	3455	3797	2485	3576	11415	3019	8949	9796
PF3D7_0501100.2			2632	2878	1941	2883	8457	2299	6896	7463
PF3D7_0501200	PIESP2	parasite-infected erythrocyte surface protein	86571	92263	65400	76084	11107	2737	4649	4949
PF3D7_0501300	SBP1	skeleton-binding protein 1	3389	4456	3624	4824	35477	8596	19626	20327
PF3D7_0501400	FIRA	interspersed repeat antigen	1589	2233	1462	2140	35413	7379	8523	11018
PF3D7_0501500	RAP3	rhoptry-associated protein 3	3444	3912	2932	2449	135183	51039	87965	100515
PF3D7_0501600	RAP2	rhoptry-associated protein 2	1872	2048	1542	1678	58658	22491	53765	50650
PF3D7_0501700	APC3	anaphase-promoting complex subunit 3, putative	32	25	45	31	1446	733	624	589
PF3D7_0501800	CAF1A	chromatin assembly factor 1 subunit A	13500	14304	10177	12091	8919	2258	5123	5082
PF3D7_0501900	TRAPPC13	trafficking protein particle complex subunit 13, putative	4125	4742	2995	3215	3280	1066	1199	1378
PF3D7_0502000	VPS11	vacuolar protein sorting-associated protein 11, putative	11835	12891	6957	9412	8136	2716	2774	2748
PF3D7_0502100		HCNGP-like protein	6550	7507	3965	4708	5090	2135	2627	2141
PF3D7_0502200	MPV17	protein Mpv17, putative	3879	3862	2613	3158	5033	1564	1830	2152
PF3D7_0502300		conserved Plasmodium protein, unknown function	49	64	37	47	142	66	87	82
PF3D7_0502400	MSP8	merozoite surface protein 8	176	112	128	151	2852	779	926	989
PF3D7_0502500		conserved Plasmodium protein, unknown function	146	215	67	42	106	17	21	18
PF3D7_0502600		conserved Plasmodium protein, unknown function	5478	6867	3713	3867	1067	239	255	279
PF3D7_0502700		conserved protein, unknown function	660	718	429	593	118	42	83	100
PF3D7_0502800		DnaJ protein, putative	1100	1105	696	940	400	175	177	178
PF3D7_0502900		Tim10/DDP family zinc finger protein, putative	6715	6825	5200	6419	3483	1414	4174	3444
PF3D7_0503000		50S ribosomal protein L28, apicoplast, putative	17658	21282	13302	12939	27317	8403	12561	14575
PF3D7_0503100	IspE	4-diphosphocytidyl-2-C-methyl-D-erythritol kinase, putative	2497	3091	1761	2338	1231	364	674	615
PF3D7_0503200	CDC6	cell division control protein 6, putative	7523	9113	4576	5859	7574	1889	2039	2189
PF3D7_0503300	SRSF12	serine/arginine-rich splicing factor 12	19105	21867	14876	16768	6529	1742	2734	2972
PF3D7_0503400	ADF1	actin-depolymerizing factor 1	63526	88474	52050	47015	217070	78512	93948	106677
PF3D7_0503500		protein kinase, putative	689	969	542	728	2734	832	874	1171
PF3D7_0503600	MyoB	myosin B	692	718	569	544	27825	8208	15852	17869
PF3D7_0503800	RPL31	60S ribosomal protein L31	69268	75834	47664	47982	17996	6173	8463	8075
PF3D7_0503900		conserved Plasmodium protein, unknown function	3116	3438	2028	2493	875	275	322	288
PF3D7_0504000	ATPase3	cation transporting P-ATPase	25209	29703	18193	23201	8786	2683	2652	3240
PF3D7_0504100		AN1-type zinc finger protein, putative	2020	2338	1187	1416	2888	913	2723	2678
PF3D7_0504200	DDX27	ATP-dependent RNA helicase DDX27, putative	10959	13718	7118	6514	20762	5622	3829	4859
PF3D7_0504300		conserved Plasmodium protein, unknown function	1029	1298	496	390	1352	596	252	313
PF3D7_0504400		ATP-dependent helicase, putative	6732	7279	4719	5860	2875	732	1650	1440
PF3D7_0504500		MOLO1 domain-containing protein, putative	144	211	134	115	605	202	456	498
PF3D7_0504600	BCKDHB	2-oxoisovalerate dehydrogenase subunit beta, mitochondrial, putative	1601	1702	1390	1425	2522	877	4560	4875
PF3D7_0504700	CEP120	centrosomal protein CEP120, putative	5912	8504	3648	5050	2246	682	571	802
PF3D7_0504800		conserved Plasmodium protein, unknown function	18737	28731	11389	13583	26625	6672	3821	5212
PF3D7_0504900		transmembrane protein TMEM222, putative	4719	6621	3800	3640	3641	1362	4449	4174
PF3D7_0505000		MMS19-like protein, putative	1178	1926	873	1280	419	151	117	174
PF3D7_0505100	TRS85	trafficking protein particle complex subunit 8, putative	11120	13202	7888	10794	9782	2546	2832	2905
PF3D7_0505200	ALP2b	actin-like protein, putative	4850	6074	4058	4700	7942	2392	7362	7262
PF3D7_0505300		UDP-N-acetylglucosamine transporter, putative	1242	1540	602	693	3822	1226	951	1174
PF3D7_0505400		conserved protein, unknown function	4506	5646	3545	3459	6523	1908	1751	2170
PF3D7_0505500	MSH6	DNA mismatch repair protein MSH6, putative	10632	10998	8759	13863	5179	1289	3648	3182
PF3D7_0505600		BCNT domain-containing protein, putative	5307	6077	3960	2956	3168	919	896	1103
PF3D7_0505700		conserved Plasmodium membrane protein, unknown function	5274	6849	4787	5979	2771	697	1481	1306
PF3D7_0505800	SUMO	small ubiquitin-related modifier	75075	90378	67698	59093	33622	12758	25610	29625
PF3D7_0505900	MED11	mediator of RNA polymerase II transcription subunit 11, putative	7522	7606	7321	9269	1711	743	3901	3245
PF3D7_0506000		conserved Plasmodium protein, unknown function	4241	4535	2747	3357	1694	510	861	838
PF3D7_0506100		60S ribosomal subunit protein L24, putative	18673	21084	11159	13559	5691	1860	2259	2319
PF3D7_0506200	TBP	TATA-box-binding protein	772	1090	519	545	346	123	174	176
PF3D7_0506300		conserved protein, unknown function	11606	13607	8316	8033	3803	1487	1259	1354
PF3D7_0506400		conserved Plasmodium protein, unknown function	31	44	28	23	830	382	741	715
PF3D7_0506500		conserved Plasmodium protein, unknown function	24847	37018	16566	20102	24523	5941	4347	6086
PF3D7_0506600		histone deacetylase, putative, pseudogene	808	826	451	406	1562	491	325	368
PF3D7_0506700		GTPase-activating protein, putative	4516	8825	4604	3436	4792	1295	1573	1818
PF3D7_0506800	TCF25	transcription factor 25, putative	12996	17526	9117	9936	8956	2679	1849	2512
PF3D7_0506900	ROM4	rhomboid protease ROM4	3587	4571	2821	3830	23050	7950	35430	32256
PF3D7_0507000		conserved protein, unknown function	3061	3581	2256	1724	1960	450	691	1008
PF3D7_0507100	RPL4	60S ribosomal protein L4	103930	151697	99990	117306	20809	7633	27288	24851
PF3D7_0507200	SUB3	subtilisin-like protease 3	705	1181	569	503	3594	1243	954	1194
PF3D7_0507300	SOPT	subtilisin-like ookinete protein SOPT	104	129	197	135	9859	3132	2748	3662
PF3D7_0507400	SUB1-ProM	subtilisin propeptide-like protein	243	323	154	153	7014	2795	5539	5875
PF3D7_0507500	SUB1	subtilisin-like protease 1	186	264	212	220	34368	9508	30836	29538
PF3D7_0507600	CAF40	protein CAF40, putative	1333	2749	2066	2396	2338	958	2079	1533
PF3D7_0507700	NPL4	nuclear protein localization protein 4, putative	13348	15333	9321	9513	7066	2542	2502	2666
PF3D7_0507800		conserved protein, unknown function	37291	50394	25774	28217	53918	14245	12782	15896
PF3D7_0507900		conserved Plasmodium protein, unknown function	5245	5435	3895	3322	1923	765	1530	1644
PF3D7_0508000	P38	6-cysteine protein	8620	9571	6235	4927	47816	15207	45718	53964
PF3D7_0508100	SET9	SET domain protein, putative	9876	15299	8262	7731	53338	15079	13632	16199
PF3D7_0508200		longevity-assurance (LAG1) protein, putative	2819	3122	1979	2072	4138	1540	2162	2405
PF3D7_0508300	TPT	triose phosphate transporter	4684	5748	3980	4569	1535	368	1806	1721
PF3D7_0508400		conserved protein, unknown function	428	603	272	199	785	284	196	264
PF3D7_0508500	ND6	ND6 protein, putative	5087	8310	4337	3548	27031	7818	6983	8581
PF3D7_0508600		conserved protein, unknown function	2836	3941	2454	2675	4340	1286	7146	6741
PF3D7_0508700	PRP5	pre-mRNA-processing ATP-dependent RNA helicase PRP5, putative	12414	19134	9815	11799	8600	2077	2648	2937
PF3D7_0508800	SSB	single-stranded DNA-binding protein	8273	9051	6103	6826	12726	3798	5403	5328
PF3D7_0508900	AAP6	protein AAP6	11339	15817	7140	9644	96196	22062	18591	25160
PF3D7_0509000	alphaSNAP	alpha-soluble NSF attachment protein, putative	15852	15498	12477	12660	11255	3401	6398	6576
PF3D7_0509100	SMC4	structural maintenance of chromosomes protein 4, putative	23395	34553	14408	18049	20987	4394	4354	5715
PF3D7_0509200	LRR2	leucine-rich repeat protein	661	835	482	440	481	161	173	219
PF3D7_0509300		conserved Plasmodium protein, unknown function	4953	6097	3735	2933	2480	846	932	1079
PF3D7_0509400	RNAPI	RNA polymerase I	18728	20433	13933	17504	8872	2540	2616	2927
PF3D7_0509500		ERCC4 domain-containing protein, putative	2083	2616	1455	1656	1368	416	495	544
PF3D7_0509600	AsnRS	asparagine--tRNA ligase	10697	12495	8394	9269	4030	955	1533	1601
PF3D7_0509700		conserved Plasmodium protein, unknown function	726	886	565	522	695	234	465	582
PF3D7_0509800	PI4KB	phosphatidylinositol 4-kinase beta	3456	6590	3838	4126	5891	1751	2541	2989
PF3D7_0509900		NSE4 domain-containing protein, putative	2361	2564	1336	1250	2364	759	515	679
PF3D7_0510000		conserved Plasmodium protein, unknown function	3324	4284	2021	1916	3928	1335	657	702
PF3D7_0510100		KH domain-containing protein, putative	24296	30754	13513	20834	27349	6745	6041	7045
PF3D7_0510200	CYP87	peptidyl-prolyl cis-trans isomerase	6224	6845	4397	5294	5273	1673	2357	2400
PF3D7_0510300	SIP	stripes inner membrane complex protein, putative	76	88	46	85	14	20	37	26
PF3D7_0510400		PDCD2 domain-containing protein, putative	3825	5007	2119	1924	2887	961	221	380
PF3D7_0510500	TopoI	topoisomerase I	15568	18488	10255	12465	12033	3503	2966	3275
PF3D7_0510600		tRNA Leucine	4	0	2	2	4	2	0	0
PF3D7_0510700		conserved Plasmodium protein, unknown function	10	28	20	16	25	8	9	23
PF3D7_0510800		WD repeat-containing protein, putative	51	68	25	12	188	75	76	52
PF3D7_0510900		small nucleolar RNA snoR04	114	109	142	84	140	65	65	100
PF3D7_0511000	TCTP	translationally-controlled tumor protein homolog	45923	52177	33204	40611	13805	4283	8055	7495
PF3D7_0511100		conserved Plasmodium protein, unknown function	169	156	108	101	207	63	163	113
PF3D7_0511200	SCD	stearoyl-CoA desaturase	15420	18672	11158	11248	20064	5193	4680	5540
PF3D7_0511300		MORN repeat protein, putative	5050	5822	3590	5364	1304	429	326	323
PF3D7_0511400		conserved Plasmodium protein, unknown function	150	178	69	76	208	65	57	58
PF3D7_0511500		RNA pseudouridylate synthase, putative	68039	108306	40206	58218	62317	14692	10337	15010
PF3D7_0511600	ARNP	apical rhoptry neck protein	987	1308	562	529	18926	7066	5577	7230
PF3D7_0511700	CGI121	EKC/KEOPS complex subunit CGI121	7337	8374	3958	5318	7940	2848	2397	2605
PF3D7_0511800	INO1	inositol-3-phosphate synthase	30793	32245	22272	29223	18432	5734	9623	10118
PF3D7_0511900		conserved Plasmodium protein, unknown function	1456	1604	764	858	278	83	74	80
PF3D7_0512000	PFD6	prefoldin subunit 6	35113	43095	24087	19517	11936	4374	3190	3823
PF3D7_0512100		conserved protein, unknown function	12828	15630	9130	6997	4182	1485	2122	2448
PF3D7_0512200	GS	glutathione synthetase	5030	5755	4843	4557	912	587	843	794
PF3D7_0512300	MAT1	CDK-activating kinase assembly factor MAT1	3101	3241	2075	2592	1096	333	976	795
PF3D7_0512400		conserved Plasmodium protein, unknown function	37	53	17	16	31	14	8	18
PF3D7_0512450		conserved Plasmodium protein, unknown function, pseudogene	131	211	124	119	39	11	27	10
PF3D7_0512500		conserved Plasmodium protein, unknown function	4223	4810	2590	3457	2070	594	682	681
PF3D7_0512600	RAB1b	ras-related protein Rab-1B	22877	28811	19533	19361	18106	5904	16609	18159
PF3D7_0512700	OPRT	orotate phosphoribosyltransferase	7714	8786	4830	6299	826	410	544	573
PF3D7_0512800		conserved Plasmodium protein, unknown function	2318	3833	1909	2442	415	145	220	200
PF3D7_0512900	AKAL	AKAP-like protein	1336	1225	1132	1254	593	120	174	202
PF3D7_0513000		conserved protein, unknown function	5566	6886	3921	4341	2185	929	518	592
PF3D7_0513100		conserved protein, unknown function	463	675	501	615	1074	345	1593	1299
PF3D7_0513200		CPSF domain-containing protein, putative	20799	30203	13448	17600	13797	3405	3568	4316
PF3D7_0513300	PNP	purine nucleoside phosphorylase	98492	99624	72213	92296	13317	4396	21517	20871
PF3D7_0513400	YihA1	GTP-binding protein YihA1	3319	3736	2591	2515	983	321	500	647
PF3D7_0513500	PAM16	mitochondrial import inner membrane translocase subunit TIM16, putative	3385	4075	2100	1954	572	184	330	273
PF3D7_0513600		deoxyribodipyrimidine photo-lyase, putative	45732	63163	38135	39743	15417	4536	5175	5870
PF3D7_0513700	PSOP12	secreted ookinete protein, putative	444	629	320	599	283	366	93	831
PF3D7_0513800	RAB1a	ras-related protein Rab-1A	14870	23046	12452	9622	6123	2068	3234	3836
PF3D7_0513900		conserved protein, unknown function	2982	3219	3685	3433	1758	1448	1944	2693
PF3D7_0514000	TTL	tubulin--tyrosine ligase, putative	681	869	368	382	1195	383	655	593
PF3D7_0514100	UvrD	ATP-dependent DNA helicase UvrD	3120	5404	2782	3066	3850	779	1092	1278
PF3D7_0514200		conserved Plasmodium protein, unknown function	3173	3538	2339	2600	3333	917	1923	2115
PF3D7_0514300		aspartate--tRNA ligase, putative	5062	5611	3570	4812	2209	687	1050	1064
PF3D7_0514400		tRNA Phenylalanine	2	13	0	2	1	1	0	1
PF3D7_0514500		conserved Plasmodium membrane protein, unknown function	124	194	116	116	184	56	163	176
PF3D7_0514600		ribose-5-phosphate isomerase, putative	3089	2912	2883	3685	847	200	957	842
PF3D7_0514700		MORN repeat protein, putative	80	155	64	47	103	33	28	44
PF3D7_0514800		inositol polyphosphate multikinase, putative	566	1017	438	622	318	128	124	143
PF3D7_0514900		conserved Plasmodium protein, unknown function	4034	4216	2538	2979	2886	1109	1596	1374
PF3D7_0515000	CWC2	pre-mRNA-splicing factor CWC2, putative	23893	30317	18632	18572	16077	4280	5919	6175
PF3D7_0515100	ROM9	rhomboid protease ROM9	1830	2746	1720	1790	1527	491	740	720
PF3D7_0515200		conserved Plasmodium protein, unknown function	593	673	353	429	508	115	334	333
PF3D7_0515300	PI3K	phosphatidylinositol 3-kinase	10418	17024	9201	10091	12505	4436	7030	7042
PF3D7_0515400		conserved protein, unknown function	270	266	214	185	18377	4762	7115	7608
PF3D7_0515500	GEP1	gametogenesis essential protein 1, putative	1124	1298	679	723	2150	636	712	854
PF3D7_0515600	GEP	gamete egress protein GEP, putative	619	730	463	485	455	102	246	312
PF3D7_0515700	GAP40	glideosome-associated protein 40, putative	10433	11240	8150	10228	85770	25834	171276	163382
PF3D7_0515800		BolA-like protein, putative	2639	3157	1699	1639	1846	462	528	585
PF3D7_0515900	NIF2	NLI interacting factor-like phosphatase, putative	4260	5282	3047	3470	3762	1258	3714	3766
PF3D7_0516000		RAP protein, putative	6500	9556	5197	4680	1748	512	496	548
PF3D7_0516100	ATPase1	cation-transporting ATPase 1	2644	3962	1869	2642	1883	714	502	683
PF3D7_0516200	RPS11	40S ribosomal protein S11	36621	41224	29957	30681	7909	2778	8699	9603
PF3D7_0516300		tRNA pseudouridine synthase, putative	4434	5496	3200	3478	2697	900	725	813
PF3D7_0516400	PhLP1	phosducin-like protein 1, putative	5040	5878	2938	3400	6378	1636	1734	2133
PF3D7_0516500	MFS1	major facilitator superfamily domain-containing protein, putative	513	607	393	408	2083	628	1371	1765
PF3D7_0516600	MB2	sporozoite surface antigen MB2	11113	17403	10209	10211	6778	3023	3200	3358
PF3D7_0516700		ubiquitin carboxyl-terminal hydrolase 2, putative	5416	7096	4825	6253	10451	2691	6754	6276
PF3D7_0516800	ApiAP2	AP2 domain transcription factor AP2-O2, putative	26505	33934	14679	20485	33786	9444	6194	7027
PF3D7_0516900	RPL2	60S ribosomal protein L2	49118	77687	53798	55357	10785	3709	15721	16004
PF3D7_0517000		60S ribosomal protein L12, putative	94561	108997	68213	63686	23498	8215	12489	13057
PF3D7_0517100		conserved protein, unknown function	4126	4642	2851	2756	1113	296	282	306
PF3D7_0517200		conserved Plasmodium protein, unknown function	623	808	368	324	1413	423	276	319
PF3D7_0517300	SR1	serine/arginine-rich splicing factor 1	34379	43032	25636	29637	21430	6723	8402	8941
PF3D7_0517400	FACT-L	FACT complex subunit SPT16, putative	44447	63314	36210	34780	19883	5567	3271	3986
PF3D7_0517500		UTP--glucose-1-phosphate uridylyltransferase, putative	516	629	308	305	787	222	163	192
PF3D7_0517600	CPbeta	F-actin-capping protein subunit beta, putative	140	276	114	85	1041	393	433	523
PF3D7_0517700	EIF3B	eukaryotic translation initiation factor 3 subunit B, putative	39487	46417	25528	29307	10613	3278	4105	3898
PF3D7_0517800	DCX	apicortin	15	65	42	23	39	8	40	19
PF3D7_0517900		zinc finger protein, putative	2417	2648	1917	1780	11499	3476	7729	8070
PF3D7_0518000		NOSIP domain-containing protein, putative	2191	2191	1887	1982	2399	825	1879	1803
PF3D7_0518100	AMR2	protein AMR2	5658	6231	3798	4682	1964	576	808	788
PF3D7_0518200	MDM2	SWIB/MDM2 domain-containing protein	5323	5116	3345	4252	9986	3358	5727	4987
PF3D7_0518300		proteasome subunit beta type-1, putative	20299	22081	15076	18884	13779	4706	18093	17229
PF3D7_0518400	CYC3	cyclin, putative	137	179	73	125	188	53	68	101
PF3D7_0518500	DDX23	ATP-dependent RNA helicase DDX23, putative	11797	14948	9203	10179	5494	1710	2655	2783
PF3D7_0518600	WDR26	WD repeat-containing protein 26, putative	8057	10958	6544	6744	9129	2480	3604	3451
PF3D7_0518700	PUF1	mRNA-binding protein PUF1	1293	1731	730	1094	859	256	240	297
PF3D7_0518800	PSOP13	secreted ookinete protein, putative	7	7	6	7	17	9	6	5
PF3D7_0518900		conserved protein, unknown function	11	9	15	22	176	66	137	124
PF3D7_0519000	SLBP	histone RNA hairpin-binding protein, putative	3613	4002	2663	3010	943	308	584	515
PF3D7_0519100		50S ribosomal protein L14, mitochondrial, putative	5623	6885	4110	3275	4447	1341	1843	2640
PF3D7_0519200		V-type proton ATPase 16 kDa proteolipid subunit	14178	19541	12236	16454	12869	5206	22878	19927
PF3D7_0519300	COX10	protoheme IX farnesyltransferase	8096	11417	6384	6104	2790	713	1575	1866
PF3D7_0519400	RPS24	40S ribosomal protein S24	114474	131353	96255	84888	35941	13237	25211	26619
PF3D7_0519500	CCR4-1	CCR4 domain-containing protein 1, putative	22328	44438	19518	18909	8029	1898	1661	1888
PF3D7_0519600		zinc finger protein, putative	10827	11734	7622	7391	5635	1720	2019	2203
PF3D7_0519700		FoP domain-containing protein, putative	14836	19720	12824	13317	12766	3774	6845	6301
PF3D7_0519800		EELM2 domain-containing protein, putative	7340	8117	5455	7320	2438	709	1035	974
PF3D7_0519900		conserved protein, unknown function	3065	3985	2234	2477	1401	426	636	594
PF3D7_0520000	RPS9	40S ribosomal protein S9, putative	114804	127392	106207	110492	26948	9329	26699	27511
PF3D7_0520100	PPM9	protein phosphatase PPM9, putative	3870	3670	2655	4280	908	287	495	520
PF3D7_0520200	MED17	mediator of RNA polymerase II transcription subunit 17, putative	6670	7586	4327	6320	1730	529	984	952
PF3D7_0520300	LSM2	U6 snRNA-associated Sm-like protein LSm2, putative	5166	5091	4326	4596	1513	666	950	941
PF3D7_0520400		single-stranded DNA-binding protein, putative	7634	8522	5011	6065	3442	1065	1499	1327
PF3D7_0520500		phosphomethylpyrimidine kinase, putative	2346	2611	1744	2087	2436	796	3045	3097
PF3D7_0520600	Ap4AH	bis(5'-nucleosyl)-tetraphosphatase [asymmetrical]	14982	17119	11936	12101	5534	1373	2279	2195
PF3D7_0520700		CDC73 domain-containing protein, putative	1368	1811	1007	1476	403	122	181	182
PF3D7_0520800		conserved protein, unknown function	6824	9015	4546	6727	3466	866	1075	1212
PF3D7_0520900	SAHH	adenosylhomocysteinase	41623	40656	32975	48191	19566	4906	45134	40368
PF3D7_0521000		conserved Plasmodium protein, unknown function	21333	28227	15480	15722	4868	1360	2417	2097
PF3D7_0521100		conserved Plasmodium protein, unknown function	396	341	302	369	280	85	140	177
PF3D7_0521200		conserved protein, unknown function	1495	1856	996	802	500	123	147	140
PF3D7_0521300		zinc finger protein, putative	8554	13768	6560	6810	4333	1168	1117	1247
PF3D7_0521400		conserved protein, unknown function	5615	4833	3591	5897	1343	358	1621	1139
PF3D7_0521500		ribosomal large subunit pseudouridylate synthase, putative	4503	4597	2879	2939	1483	434	436	449
PF3D7_0521600		conserved Plasmodium protein, unknown function	1128	1455	927	720	578	197	190	210
PF3D7_0521700	DDX1	ATP-dependent RNA helicase DDX1, putative	663	601	490	778	191	79	99	113
PF3D7_0521800		AFG1-like ATPase, putative	1610	1786	1116	1460	1417	563	423	479
PF3D7_0521900		conserved Plasmodium protein, unknown function	1180	1440	841	1058	345	108	162	216
PF3D7_0522000		conserved Plasmodium protein, unknown function	16387	22914	15289	13408	5014	2130	4027	3867
PF3D7_0522100		conserved Plasmodium protein, unknown function	1947	2282	1334	1639	9085	2333	2494	2963
PF3D7_0522200	TAF10	transcription initiation factor TFIID subunit 10, putative	9403	9952	6372	7321	8475	2788	4740	4519
PF3D7_0522300		18S rRNA (guanine-N(7))-methyltransferase, putative	8451	8741	7601	7554	6501	1923	6037	6587
PF3D7_0522400		conserved Plasmodium protein, unknown function	6721	9885	4023	5437	55302	14616	8904	13545
PF3D7_0522500	RPL17	50S ribosomal protein L17, apicoplast, putative	3023	3898	2779	2550	3746	1123	2009	2243
PF3D7_0522600		magnesium transporter NIPA, putative	747	1060	539	571	6615	1836	3036	3237
PF3D7_0522700	SufA	iron-sulfur cluster assembly protein SufA	3192	3978	2206	2487	1148	381	568	514
PF3D7_0522800	BUD31	pre-mRNA-splicing factor BUD31, putative	6196	7120	4384	3927	1932	702	675	741
PF3D7_0522900		zinc finger protein, putative	226	245	154	185	410	157	179	207
PF3D7_0523000	MDR1	multidrug resistance protein 1	21900	22920	17900	24539	22580	5996	9932	9000
PF3D7_0523100	QCR2	mitochondrial-processing peptidase subunit alpha, putative	6308	6051	4841	6536	2210	527	2289	1987
PF3D7_0523200		heptatricopeptide repeat-containing protein, putative	6535	7478	3883	4409	2275	899	712	631
PF3D7_0523300	ApiCOX18	cytochrome c oxidase subunit ApiCOX18, putative	4161	6012	3363	3534	4026	1462	2362	2675
PF3D7_0523400		DnaJ protein, putative	4390	5156	3875	5061	5979	1686	3940	3744
PF3D7_0523500		dynein light chain Tctex-type, putative	664	705	331	407	644	257	310	325
PF3D7_0523600		conserved protein, unknown function	3920	3731	3114	3221	2562	837	2082	2314
PF3D7_0523700		conserved Plasmodium membrane protein, unknown function	2686	3563	1397	1911	759	203	193	247
PF3D7_0523800		divalent metal transporter, putative	1497	1778	1101	1411	1659	534	661	794
PF3D7_0523900		MerC domain-containing protein, putative	786	905	559	823	901	326	784	752
PF3D7_0524000	KASbeta	karyopherin beta	30802	46071	28733	37976	15631	3900	9408	8879
PF3D7_0524100		conserved Plasmodium protein, unknown function	14354	19584	9281	10059	8536	2633	1862	2191
PF3D7_0524200		conserved Plasmodium membrane protein, unknown function	114	61	42	87	358	144	611	443
PF3D7_0524300		conserved Plasmodium protein, unknown function	5653	6268	5370	4431	2838	1334	1667	1695
PF3D7_0524400	RBG1	ribosome-interacting GTPase 1, putative	11724	12721	9098	11434	6077	1523	5855	5627
PF3D7_0524500		conserved Plasmodium protein, unknown function	1373	1380	813	1093	632	214	784	583
PF3D7_0524600		50S ribosomal protein L12, apicoplast, putative	8986	10451	5622	5925	8593	2450	4069	3889
PF3D7_0524700	TOM22	mitochondrial import receptor subunit TOM22, putative	6686	7210	4898	4863	1671	615	794	853
PF3D7_0524800	UFD1	ubiquitin fusion degradation protein 1, putative	2077	2298	1295	1453	7565	2186	3342	3916
PF3D7_0524900	TYW1	S-adenosyl-L-methionine-dependent tRNA 4-demethylwyosine synthase, putative	10458	13648	8406	8530	3232	1101	1133	1272
PF3D7_0525000		zinc finger protein, putative	9610	14657	7546	9855	3073	954	1321	1320
PF3D7_0525100	ACS10	acyl-CoA synthetase	17259	19022	15997	20853	21063	5226	33414	30547
PF3D7_0525200	SMC6	structural maintenance of chromosomes protein 6, putative	20457	28971	12212	13787	34758	9761	5630	7734
PF3D7_0525300		conserved protein, unknown function	1616	1778	833	840	28703	7695	3644	5226
PF3D7_0525400		7-helix-1 protein	1583	1897	1502	1585	5626	2144	3496	3175
PF3D7_0525500		WD repeat-containing protein, putative	2298	2848	1344	1932	1517	623	338	422
PF3D7_0525600		RNA methyltransferase, putative	5169	6244	4029	5044	21191	6703	6229	7629
PF3D7_0525700		conserved protein, unknown function	1132	1174	1029	1699	16042	4857	4876	5898
PF3D7_0525800	IMC1g	inner membrane complex protein 1g, putative	659	1049	543	454	96261	29612	53000	66125
PF3D7_0525900	NEK2	NIMA related kinase 2	15	19	10	4	1277	363	574	701
PF3D7_0526000		RAP protein, putative	8962	11576	4527	4566	3907	1353	1176	1001
PF3D7_0526100		conserved Plasmodium membrane protein, unknown function	3985	3888	2822	2720	1219	384	555	603
PF3D7_0526200	ARFGAP2	ADP-ribosylation factor GTPase-activating protein 2	334	334	343	508	441	90	526	422
PF3D7_0526200.2			13165	13312	9094	9898	20439	6031	9962	9756
PF3D7_0526300	WDR55	WD repeat-containing protein 55, putative	4864	6300	3973	3640	4885	2510	2897	3174
PF3D7_0526400		conserved Plasmodium protein, unknown function	2931	3173	2200	2508	4250	1370	3942	3993
PF3D7_0526500		conserved Plasmodium protein, unknown function	3259	5040	3135	2932	1621	402	401	503
PF3D7_0526600		conserved Plasmodium protein, unknown function	2571	3265	1985	2567	2008	742	887	967
PF3D7_0526700		conserved protein, unknown function	11491	12975	6964	7467	6686	2162	1075	1370
PF3D7_0526800		conserved Plasmodium protein, unknown function	20894	22978	14354	15326	6817	1986	1893	2164
PF3D7_0526900		transmembrane emp24 domain-containing protein, putative	25156	31254	20597	20211	11792	3773	7693	8164
PF3D7_0527000	MCM3	DNA replication licensing factor MCM3, putative	75176	95570	64963	59488	73837	20715	24418	27653
PF3D7_0527100	UBC13	ubiquitin-conjugating enzyme E2 13	35880	37895	25894	29835	34687	11408	19557	18735
PF3D7_0527200	USP14	ubiquitin carboxyl-terminal hydrolase 14	36684	42676	31313	34522	29567	9771	21490	21526
PF3D7_0527300	METAP1a	methionine aminopeptidase 1a, putative	7962	9206	5460	5748	5289	1631	1764	2223
PF3D7_0527400		conserved Plasmodium protein, unknown function	4571	7329	3480	2950	4171	1773	1229	1651
PF3D7_0527500	HIP	Hsc70-interacting protein	50625	56729	45308	61218	10196	2836	14746	13310
PF3D7_0527600		conserved Plasmodium protein, unknown function	4924	7746	4959	5540	4879	1665	2697	2592
PF3D7_0527700		tRNA Glutamic acid	0	0	0	0	1	0	0	1
PF3D7_0527800		tRNA Leucine	0	1	0	1	0	6	2	1
PF3D7_0527900	DDX41	ATP-dependent RNA helicase DDX41, putative	6231	6327	5140	5931	2100	610	1375	1399
PF3D7_0528000	UMP1	proteasome maturation factor UMP1, putative	5617	5847	3479	4740	2850	985	2099	1708
PF3D7_0528100		AP-1/2 complex subunit beta, putative	11585	11897	9655	10339	12915	3060	7596	8445
PF3D7_0528200	EIF3E	eukaryotic translation initiation factor 3 subunit E, putative	20201	21751	15966	18082	11846	3422	9831	9380
PF3D7_0528300		conserved protein, unknown function	79	127	51	75	9863	2846	5284	5431
PF3D7_0528400	DHHC7	palmitoyltransferase DHHC7	1588	1622	1191	1171	60507	19706	30109	34352
PF3D7_0528500	CPalpha	F-actin-capping protein subunit alpha, putative	7333	9266	6070	5120	6599	2653	5085	5179
PF3D7_0528600		conserved Plasmodium protein, unknown function	4441	5957	3769	3043	2945	1186	2178	2506
PF3D7_0528700	CYP23	peptidyl-prolyl cis-trans isomerase	3700	4111	3119	3194	1600	510	1604	1789
PF3D7_0528800		nuclear GTP-binding protein, putative	3829	4773	2773	3751	1429	379	537	597
PF3D7_0528900		conserved protein, unknown function	742	1051	428	271	2198	638	548	667
PF3D7_0529000	TIP	T-cell immunomodulatory protein homolog, putative	8953	10806	7004	9511	11502	3887	8475	8034
PF3D7_0529100	ATrx2	thioredoxin-like protein, putative	2412	3199	2139	1802	1037	278	545	606
PF3D7_0529200		sugar transporter, putative	1266	1830	1104	945	762	248	481	569
PF3D7_0529300	TIC22	apicoplast TIC22 protein	771	846	558	628	459	197	370	461
PF3D7_0529400		conserved Plasmodium protein, unknown function	1463	1691	1298	1764	2480	567	1414	1311
PF3D7_0529400.2			23273	26479	17375	20936	51117	12092	19773	20268
PF3D7_0529500		cell cycle regulator protein, putative	2051	2417	1728	2265	695	231	732	696
PF3D7_0529600		tRNA Arginine	0	2	0	0	0	0	1	0
PF3D7_0529700		heptatricopeptide repeat-containing protein, putative	2264	3271	1489	1726	1285	418	294	410
PF3D7_0529800		conserved Plasmodium protein, unknown function	12023	17124	7771	10481	13938	3364	3058	3975
PF3D7_0529900		RING zinc finger protein, putative	6858	9917	6246	6272	14769	4501	10094	10873
PF3D7_0530000		conserved Plasmodium protein, unknown function	4809	5883	2999	3685	2928	790	757	951
PF3D7_0530100	SYN6	SNARE protein, putative	4524	5617	3315	3101	16777	4611	6479	7965
PF3D7_0530200	PPT	phosphoenolpyruvate/phosphate translocator	2570	2781	2266	2706	2024	752	1535	1449
PF3D7_0530300	PIC6	PhIL1-interacting candidate PIC6	3819	5712	2770	2601	13494	3717	2566	3470
PF3D7_0530400		conserved Plasmodium protein, unknown function	3288	4417	1523	1828	2707	828	337	362
PF3D7_0530500		conserved Plasmodium membrane protein, unknown function	502	619	402	430	177	91	63	72
PF3D7_0530600		XAP-5 DNA binding protein, putative	7308	9158	5116	4515	2424	752	430	424
PF3D7_0530700		conserved Plasmodium protein, unknown function	4189	5161	2845	3526	1503	482	345	446
PF3D7_0530750	DPM3	dolichol-phosphate mannosyltransferase subunit 3, putative	1197	1396	683	970	322	177	103	127
PF3D7_0530800		CPW-WPC family protein	1053	1084	617	696	929	343	639	774
PF3D7_0530900	FRM1	formin 1	1078	1178	555	869	8450	2329	2019	2393
PF3D7_0531000		SURF1 domain-containing protein, putative	2078	2670	1711	1939	2979	954	1046	1148
PF3D7_0531100		conserved Plasmodium protein, unknown function	3036	4315	1353	1822	20100	4267	2732	4033
PF3D7_0531200		ribosomal protein S16, mitochondrial, putative	2324	2938	1711	1524	1285	382	461	427
PF3D7_0531300		conserved Plasmodium protein, unknown function	4169	5078	3182	2557	4305	1471	1626	1802
PF3D7_0531400		G-patch domain-containing protein, putative	3138	3872	1664	2263	1523	450	308	338
PF3D7_0531500		non-coding RNA	14	12	0	12	5	8	4	4
PF3D7_0531600		18S ribosomal RNA	0	0	0	0	0	0	0	0
PF3D7_0531800		5.8S ribosomal RNA	0	0	0	0	0	0	0	0
PF3D7_0532000		28S ribosomal RNA	0	0	0	0	0	0	0	0
PF3D7_0532100	ETRAMP5	early transcribed membrane protein 5	124884	157363	122985	148454	36067	10174	31114	29044
PF3D7_0532200		Plasmodium exported protein (PHISTc), unknown function	15	44	15	28	19	19	13	27
PF3D7_0532300		Plasmodium exported protein (PHISTb), unknown function	4	0	0	2	0	2	0	0
PF3D7_0532400	LyMP	lysine-rich membrane-associated PHISTb protein	0	1	2	0	0	0	0	2
PF3D7_0532500		Plasmodium exported protein, unknown function	0	0	0	0	0	0	0	1
PF3D7_0532600		Plasmodium exported protein, unknown function	1	0	0	1	1	0	0	0
PF3D7_0532700	VAR	erythrocyte membrane protein 1 (PfEMP1), pseudogene	2	0	2	0	1	0	0	0
PF3D7_0532800		stevor, pseudogene	0	0	0	0	0	0	0	0
PF3D7_0532900	RIF	rifin	0	0	0	0	0	0	0	0
PF3D7_0533000	RIF	rifin, pseudogene	0	0	0	0	0	0	0	0
PF3D7_0533100	VAR1CSA	erythrocyte membrane protein 1 (PfEMP1), pseudogene	0	0	0	0	0	0	0	4
PF3D7_0600100	VAR	erythrocyte membrane protein 1 (PfEMP1), pseudogene	15	5	0	1	11	4	6	8
PF3D7_0600200	VAR	erythrocyte membrane protein 1, PfEMP1	198	304	138	152	199	115	137	245
PF3D7_0600300	RIF	rifin	20	13	25	22	55	9	86	69
PF3D7_0600400	VAR	erythrocyte membrane protein 1, PfEMP1	19	16	10	25	42	18	18	4
PF3D7_0600500	RIF	rifin	336	352	278	264	276	104	125	130
PF3D7_0600600	VAR	erythrocyte membrane protein 1 (PfEMP1), exon 2	6	16	8	17	10	6	19	11
PF3D7_0600700	RIF	rifin	2	12	4	6	20	8	13	8
PF3D7_0600800	RIF	rifin, pseudogene	8	16	2	2	14	7	7	8
PF3D7_0600900	RIF	rifin, pseudogene	8	16	8	4	11	8	7	4
PF3D7_0601000	EPF4	exported protein family 4	0	0	0	0	0	0	0	0
PF3D7_0601100	EPF3	exported protein family 3	2	19	4	4	2	3	4	1
PF3D7_0601200	MC-2TM	Pfmc-2TM Maurer's cleft two transmembrane protein	66	58	47	94	40	10	12	17
PF3D7_0601300	EPF1	exported protein family 1	0	2	0	0	0	0	0	0
PF3D7_0601400	VAR	erythrocyte membrane protein 1 (PfEMP1), pseudogene	5	22	2	2	9	6	4	4
PF3D7_0601500		Plasmodium exported protein (PHISTb), unknown function	42	46	48	26	4	4	2	6
PF3D7_0601600		tetratricopeptide repeat protein, putative	251	269	155	153	220	77	120	94
PF3D7_0601700		Plasmodium exported protein (PHISTa), unknown function, pseudogene	612	624	363	416	315	56	74	64
PF3D7_0601800		H/ACA snoRNA	2	2	2	5	1	4	4	1
PF3D7_0601900		conserved Plasmodium protein, unknown function	12457	16537	10837	12151	2249	799	781	873
PF3D7_0602000		zinc finger protein, putative	1212	1369	1078	1689	909	235	368	451
PF3D7_0602100	MTR4	ATP-dependent RNA helicase MTR4	6310	7984	4807	6598	1666	416	707	719
PF3D7_0602200		MYND-type zinc finger protein, putative	5511	6377	4116	4104	1107	368	567	592
PF3D7_0602300	PALM	liver merozoite formation protein, putative	214	187	78	123	64	33	25	12
PF3D7_0602400	EF-G	elongation factor G	10952	15190	9780	9597	3085	967	855	987
PF3D7_0602500		geranylgeranyl transferase type-2 subunit beta, putative	6797	7793	4872	5657	2172	673	816	928
PF3D7_0602600		SAC3 domain-containing protein, putative	7986	8798	5558	6926	4022	1103	1290	1348
PF3D7_0602700		conserved Plasmodium protein, unknown function	405	462	231	226	156	47	56	73
PF3D7_0602800	JmjC2	JmjC domain-containing protein 2, putative	2148	2804	1521	1331	1397	497	268	264
PF3D7_0602900		conserved Plasmodium protein, unknown function	3307	3349	2101	2400	11678	3407	2761	3343
PF3D7_0603000		SDE2 domain-containing protein, putative	12605	17602	7645	5777	22264	7144	2894	4233
PF3D7_0603100		RNA-binding protein, putative	4126	4967	3042	2912	2638	752	805	801
PF3D7_0603200	BCS1	mitochondrial chaperone BCS1, putative	14481	16642	11471	12117	2920	1070	2017	1886
PF3D7_0603300	DHODH	dihydroorotate dehydrogenase	13156	13658	10485	11879	1901	757	1327	1305
PF3D7_0603400	TEX1	trophozoite exported protein 1	4223	5424	3400	3808	1740	542	698	839
PF3D7_0603500	CAX	cation/H+ antiporter	3685	5161	2518	2653	3512	1130	1546	1473
PF3D7_0603600		AT-rich interactive domain-containing protein, putative	1739	2313	1021	1098	916	351	216	232
PF3D7_0603700	mFRS	phenylalanine--tRNA ligase	2271	2828	1434	1988	608	184	237	220
PF3D7_0603800	CEP76	NdP2 protein, putative	6568	7769	5314	5351	16472	6018	6763	7036
PF3D7_0603900		conserved Plasmodium protein, unknown function	312	347	157	165	425	139	189	204
PF3D7_0604000		conserved Plasmodium protein, unknown function	892	943	418	605	269	98	82	101
PF3D7_0604100	SIP2	AP2 domain transcription factor	4928	6403	3646	5246	40157	10105	11829	13137
PF3D7_0604200		ribosomal protein L41, mitochondrial, putative	445	548	410	490	86	42	111	73
PF3D7_0604300		conserved Plasmodium protein, unknown function	5128	7018	3399	3857	2228	589	804	838
PF3D7_0604400		conserved protein, unknown function	64	57	31	21	94	26	15	10
PF3D7_0604500		GYF domain-containing protein, putative	121094	177634	76804	98627	125504	27602	21559	28258
PF3D7_0604600		DNA helicase, putative	1571	2392	1048	1398	553	191	218	215
PF3D7_0604700	GILP	glyoxalase I-like protein GILP	6879	8731	5364	6323	2583	960	1790	1614
PF3D7_0604800		RAP protein, putative	2168	2520	1405	1770	321	112	65	71
PF3D7_0604900		conserved Plasmodium protein, unknown function	6450	5969	4124	3985	1133	368	715	1032
PF3D7_0605000		50S ribosomal protein L24, putative	1848	2103	1273	1531	337	110	160	187
PF3D7_0605100	KH1	KH domain-containing protein, putative	4251	5755	3746	4583	7122	1730	4021	4151
PF3D7_0605200		acylphosphatase, putative	12205	12021	9501	8286	7252	2643	6851	8902
PF3D7_0605300	ARK1	serine/threonine protein kinase ARK1	6857	8591	4894	4415	4318	1537	2889	3328
PF3D7_0605400		calcium-binding protein, putative	553	655	372	366	738	342	156	156
PF3D7_0605500		cyclin dependent kinase binding protein, putative	1825	2478	1330	1268	2867	591	615	810
PF3D7_0605600		nucleoside diphosphate kinase, putative	179	203	125	145	475	111	112	167
PF3D7_0605700		conserved Plasmodium protein, unknown function	33	28	23	10	1110	239	484	555
PF3D7_0605800	RAD50	DNA repair protein RAD50, putative	22187	30540	12594	15997	10658	3156	2044	2177
PF3D7_0605900		elongation of fatty acids protein, putative	1827	2237	1286	1377	8521	2729	4815	5468
PF3D7_0606000	KIC1	protein KIC1	8512	9892	6634	7269	33336	9833	9462	10770
PF3D7_0606100		RNA-binding protein, putative	14457	17184	11536	12212	9969	2724	3826	4211
PF3D7_0606200	PEX4	ubiquitin-conjugating enzyme E2 PEX4, putative	2492	3073	2109	2186	8959	3197	10817	11240
PF3D7_0606300		conserved Plasmodium protein, unknown function	194	182	74	47	1912	450	513	615
PF3D7_0606400		conserved Plasmodium protein, unknown function	51	18	33	10	114	43	47	34
PF3D7_0606500	PTB	polypyrimidine tract-binding protein, putative	6660	9413	5621	6523	4170	1061	1755	1601
PF3D7_0606600		conserved Plasmodium protein, unknown function	9355	12424	5637	7378	6760	1684	1270	1505
PF3D7_0606700		coatomer alpha subunit, putative	16731	20452	13973	15922	17564	4899	5961	6469
PF3D7_0606800	VFT1	VFT protein	5844	6562	3716	4908	5830	1838	5362	6285
PF3D7_0606900	GLP2	glutaredoxin-like protein	6237	6739	4565	5482	1860	668	2466	2261
PF3D7_0607000		translation initiation factor IF-2, putative	129379	207154	111039	97553	52489	13579	11881	13792
PF3D7_0607100		MYND-type zinc finger protein, putative	27	91	25	32	86	17	24	24
PF3D7_0607200		RING zinc finger protein, putative	5291	6339	3128	3337	1942	607	590	617
PF3D7_0607300	UROD	uroporphyrinogen III decarboxylase	6443	7995	4467	3939	1576	615	347	331
PF3D7_0607400		G-protein associated signal transduction protein, putative	4698	6347	4015	4603	2962	1158	1453	1632
PF3D7_0607500	COQ2	4-hydroxybenzoate polyprenyltransferase, putative	4543	5315	2806	3574	5193	1992	1752	1944
PF3D7_0607600	SAS6	spindle assembly abnormal protein 6, putative	13535	14970	8380	10994	23408	7515	8299	8386
PF3D7_0607700		conserved Plasmodium protein, unknown function	5638	6510	2798	4878	27577	6087	5828	6624
PF3D7_0607800		GTP-binding protein, putative	4278	4867	2910	3154	1489	433	353	449
PF3D7_0607900		conserved Plasmodium protein, unknown function	5075	6612	3996	4344	1268	498	557	509
PF3D7_0608000	DPH7	diphthine methyltransferase, putative	11061	13132	8840	8826	3056	1213	1813	1805
PF3D7_0608100		conserved Plasmodium protein, unknown function	23359	32810	16861	17438	10267	2850	2217	2686
PF3D7_0608200		conserved Plasmodium protein, unknown function	1270	1707	993	1136	501	192	113	144
PF3D7_0608300		heptatricopeptide repeat-containing protein, putative	4025	7064	3140	3598	1010	255	348	296
PF3D7_0608310	SAM50	sorting assembly machinery 50 kDa subunit, putative	9403	10742	6154	6894	2826	982	639	660
PF3D7_0608400	C4AP4	respiratory chain complex 4 associated protein 4	2558	2760	1813	2343	975	548	1415	1178
PF3D7_0608500		proteasome subunit alpha type-2, putative	24495	24496	18742	24272	11007	3052	10123	9892
PF3D7_0608600		conserved Plasmodium protein, unknown function	3078	3793	2147	2287	1448	503	438	463
PF3D7_0608700	CCT6	T-complex protein 1 subunit zeta	32558	30658	25825	39186	4377	1683	7963	6343
PF3D7_0608800	OAT	ornithine aminotransferase	21317	58023	21897	18102	5638	2668	4584	4230
PF3D7_0608900		conserved Plasmodium protein, unknown function	8756	10319	6014	5075	13109	3743	2680	3626
PF3D7_0609000	NUP637	nucleoporin NUP637, putative	26094	35765	13598	18240	20939	5367	3173	4198
PF3D7_0609100	ZIP1	zinc transporter ZIP1, putative	11848	15049	9355	9355	10381	3819	5237	5247
PF3D7_0609200		citrate synthase-like protein, putative	1024	1332	497	968	1308	372	449	522
PF3D7_0609300		conserved Plasmodium protein, unknown function	3391	6650	2713	2262	2338	1228	352	358
PF3D7_0609400	CLS	mitochondrial cardiolipin synthase, putative	10338	15270	5900	5372	7462	2920	936	880
PF3D7_0609500		conserved Plasmodium protein, unknown function	138	137	66	92	745	193	221	193
PF3D7_0609600		conserved Plasmodium protein, unknown function	44	125	51	69	151	63	50	58
PF3D7_0609700	KIC6	protein KIC6	3242	5493	2914	2878	26820	7816	7740	9059
PF3D7_0609800	DHHC2	palmitoyltransferase DHHC2, putative	4420	7244	3760	2935	20646	8355	9404	11398
PF3D7_0609900		conserved Plasmodium protein, unknown function	1798	2010	1368	1600	5059	1285	1535	1743
PF3D7_0610000		ribosomal protein L19, mitochondrial, putative	4802	4945	3639	3557	3288	895	1429	1642
PF3D7_0610100	SLU7	pre-mRNA-splicing factor SLU7, putative	16861	21923	14825	15812	6771	1786	2946	3298
PF3D7_0610200	RBM25	RNA-binding protein 25, putative	24685	36553	17147	18885	9802	2023	1935	2569
PF3D7_0610300		non-coding RNA	7	19	20	11	24	15	39	66
PF3D7_0610400	H3	histone H3	104659	172278	74365	83899	251165	72130	194551	200869
PF3D7_0610500		peptidyl-tRNA hydrolase PTRHD1, putative	107033	174785	75925	86084	251131	72069	194538	200806
PF3D7_0610600	CDPK2	calcium-dependent protein kinase 2	6833	7973	5665	6823	4683	1411	4276	4093
PF3D7_0610700		conserved Plasmodium protein, unknown function	1953	1907	1593	2846	669	149	1264	1211
PF3D7_0610800	TK	transketolase	36227	36341	27804	36486	12774	3696	12954	12421
PF3D7_0610900	SPT5	transcription elongation factor SPT5, putative	12168	18395	11088	12798	7796	1975	2681	3130
PF3D7_0611000		SNARE associated Golgi protein, putative	2859	3287	1958	2224	2969	790	1188	1149
PF3D7_0611100	SDH3	succinate dehydrogenase subunit 3, putative	968	1680	839	964	1007	441	817	615
PF3D7_0611200	AP2-EXP2	AP2 domain transcription factor AP2-EXP2	8204	7958	5078	6221	2457	862	1405	1144
PF3D7_0611300	ATPTG2	ATP synthase-associated protein, putative	7747	7721	4641	5140	1739	596	570	633
PF3D7_0611400	SWIB	SWI/SNF-related matrix-associated actin-dependent regulator of chromatin	6825	7801	4661	4983	4626	1172	819	1141
PF3D7_0611500		conserved protein, unknown function	186	227	100	110	330	106	99	108
PF3D7_0611600	BTP1	basal complex transmembrane protein 1	4441	6037	3308	3388	16993	4045	5644	6602
PF3D7_0611700	RPL39	60S ribosomal protein L39	21179	23723	16888	19866	7212	2544	7490	8411
PF3D7_0611800		conserved Plasmodium protein, unknown function	20455	23454	11398	17991	24051	6933	6204	7331
PF3D7_0611900		lsm12, putative	10255	13362	7613	7319	4991	1545	2047	2874
PF3D7_0612000		conserved Plasmodium protein, unknown function	10303	13667	7869	7203	5671	1810	2823	3760
PF3D7_0612100	EIF3L	eukaryotic translation initiation factor 3 subunit L, putative	26165	27672	17711	21660	11369	2754	2802	3073
PF3D7_0612200	LRR6	leucine-rich repeat protein	12324	14467	7035	9365	27619	7951	5928	7355
PF3D7_0612300	TMEM234	transmembrane protein 234, putative	128	97	55	127	126	42	89	63
PF3D7_0612400		conserved Plasmodium protein, unknown function	2807	3530	1645	1339	4316	1508	664	800
PF3D7_0612500		conserved Plasmodium protein, unknown function	297	424	190	201	565	245	206	203
PF3D7_0612600	NCS6	cytoplasmic tRNA 2-thiolation protein 1, putative	4859	5817	3696	4021	16103	5097	5355	5745
PF3D7_0612700	P12	6-cysteine protein P12	3348	3801	2276	2552	16175	5792	7691	8183
PF3D7_0612800	P12p	6-cysteine protein P12p	815	1349	584	602	766	293	248	332
PF3D7_0612900	NOG1	nucleolar GTP-binding protein 1, putative	33067	42763	27207	25215	9575	2899	3680	3727
PF3D7_0613000		conserved Plasmodium protein, unknown function	4713	4937	3315	3796	1238	916	1495	1510
PF3D7_0613000.2			15432	15758	11709	15622	3184	1153	4426	4003
PF3D7_0613000.3			8898	9016	6936	8833	1932	696	2457	2203
PF3D7_0613100		conserved Plasmodium protein, unknown function	6484	6606	3665	3296	8673	2740	3149	3933
PF3D7_0613200		conserved Plasmodium protein, unknown function	2707	2639	1627	2018	1385	490	749	784
PF3D7_0613300	ROP14	rhoptry protein ROP14	1230	1749	692	822	70842	16729	14645	19372
PF3D7_0613400	RPL18	50S ribosomal protein L18, apicoplast, putative	7809	8655	6549	6855	8471	2989	11126	10851
PF3D7_0613500		AP-3 complex subunit beta, putative	8962	10358	5399	6463	6931	1771	1319	1614
PF3D7_0613600		conserved Plasmodium protein, unknown function	3831	4066	2044	2270	27713	6653	5634	7390
PF3D7_0613700		syntaxin-binding protein, putative	14522	19278	10376	10447	11195	3328	3688	4154
PF3D7_0613800	ApiAP2	AP2 domain transcription factor, putative	16411	21167	10887	18322	57059	13851	14413	17970
PF3D7_0613900	MyoE	myosin E, putative	1029	1352	676	808	93897	26782	22074	29827
PF3D7_0614000		thiamine-phosphate synthase, putative	16580	18890	12060	12529	34886	9897	11346	14861
PF3D7_0614100		filamin domain-containing protein, putative	1464	2446	1273	1409	7351	1510	2033	2388
PF3D7_0614200	NAR1	cytosolic Fe-S cluster assembly factor NAR1, putative	2152	2861	1468	1478	2046	662	552	759
PF3D7_0614300	MFR1	major facilitator superfamily-related transporter, putative	28379	33781	24043	26961	25678	5991	25637	25550
PF3D7_0614400	CWF7	pre-mRNA-splicing factor CWF7, putative	4058	5116	2709	2895	2101	936	857	904
PF3D7_0614500	RPL19	60S ribosomal protein L19	122396	143851	90346	95449	33200	10095	14042	13748
PF3D7_0614600		conserved Plasmodium protein, unknown function	124	223	90	81	2310	630	1051	1116
PF3D7_0614700		F-box protein FBXO6, putative	573	996	539	336	20658	5264	7114	8391
PF3D7_0614800	NTHL1	endonuclease III-like protein 1, putative	11129	11586	7556	9392	5852	1571	2336	2582
PF3D7_0614900		conserved Plasmodium membrane protein, unknown function	13308	18949	8948	8748	29884	8356	4766	5996
PF3D7_0615000		conserved Plasmodium protein, unknown function	2192	2959	1963	2050	1304	421	1024	1072
PF3D7_0615100	ENR	enoyl-acyl carrier reductase	88	93	61	50	83	36	60	76
PF3D7_0615200		conserved protein, unknown function	936	1515	810	439	1000	344	261	253
PF3D7_0615300	GWT1	GPI-anchored wall transfer protein 1, putative	3237	4864	2504	2373	2028	577	713	712
PF3D7_0615400		ribonuclease, putative	72721	110270	50399	61739	52265	12702	12048	13777
PF3D7_0615500	CRK5	cdc2-related protein kinase 5	14790	17353	11020	11562	17199	4929	9047	10161
PF3D7_0615600		zinc finger protein, putative	14700	16378	9642	11764	6281	1943	1389	1582
PF3D7_0615700	ALYREF	THO complex subunit 4, putative	13983	17166	10372	9118	8661	2591	4330	4828
PF3D7_0615800	COG4	conserved oligomeric Golgi complex subunit 4, putative	17516	20346	10737	10105	13126	3835	2373	3034
PF3D7_0615900		protein phosphatase, putative	20936	37021	16187	16162	7691	1898	1620	2086
PF3D7_0616000	PDXK	pyridoxal kinase	1717	1940	1284	1793	557	153	415	402
PF3D7_0616100		conserved Plasmodium protein, unknown function	1797	2265	1489	1197	1090	368	379	434
PF3D7_0616200	NDC80	kinetochore protein NDC80, putative	13680	17912	10698	11294	17027	5199	5614	5995
PF3D7_0616300		conserved Plasmodium protein, unknown function	2119	2554	1320	1695	1011	317	412	447
PF3D7_0616400		conserved Plasmodium protein, unknown function	1722	2582	1295	1577	1140	338	393	371
PF3D7_0616500	TLP	TRAP-like protein	103	104	19	42	190	71	60	64
PF3D7_0616600		conserved protein, unknown function	8462	10256	5779	5247	6232	1517	1637	1950
PF3D7_0616700		ras GTPAse, putative	1544	2225	1161	1238	487	184	208	255
PF3D7_0616800	MQO	malate:quinone oxidoreductase	5665	9242	5409	5730	2267	685	1799	1474
PF3D7_0616900		conserved Plasmodium protein, unknown function	8796	13713	7014	7338	2853	953	959	1033
PF3D7_0617000	TOM40	mitochondrial import receptor subunit TOM40, putative	5071	7360	4425	4225	1058	425	565	527
PF3D7_0617100		AP-2 complex subunit alpha, putative	6670	10160	5755	6523	8192	2083	2947	3188
PF3D7_0617200		BFR1 domain-containing protein, putative	99570	135477	81545	80135	50375	11243	11537	14116
PF3D7_0617300		RNA-binding protein, putative	2635	2892	1883	2199	9368	3235	7945	8269
PF3D7_0617400	VAR	erythrocyte membrane protein 1, PfEMP1	810	839	593	810	1094	386	757	684
PF3D7_0617500	RIF	rifin, pseudogene	116	128	138	98	24	23	8	34
PF3D7_0617600		stevor	76	105	66	89	20	5	13	4
PF3D7_0617700	RIF	rifin	6	17	14	6	21	9	0	11
PF3D7_0617800	H2A	histone H2A	55151	134077	71780	63365	155400	43851	147670	210667
PF3D7_0617900	H3.3	histone H3 variant	14805	23386	15004	18792	28208	9637	40939	38999
PF3D7_0618000		conserved Plasmodium membrane protein, unknown function	739	634	394	495	38973	12262	13751	14518
PF3D7_0618100		conserved Plasmodium protein, unknown function	4544	5327	2937	3881	6210	1912	1784	1951
PF3D7_0618200		conserved protein, unknown function	20283	21694	13572	15415	5067	1688	1885	1915
PF3D7_0618300		60S ribosomal protein L27a, putative	48484	52090	36599	40726	13656	4141	9235	9159
PF3D7_0618400		LMBR1 domain-containing protein, putative	127	158	52	108	231	45	58	95
PF3D7_0618500	MDH	malate dehydrogenase	2936	3773	2235	2983	3934	1376	2573	2477
PF3D7_0618600	ROM10	rhomboid protease ROM10	3763	5175	2814	3047	2336	746	1490	1369
PF3D7_0618700		trafficking protein particle complex subunit 6A, putative	7849	8388	5437	5556	3308	1207	1848	1699
PF3D7_0618800		heptatricopeptide repeat-containing protein, putative	6995	7634	4193	5208	2922	878	980	1074
PF3D7_0618900	GPI1	phosphatidylinositol N-acetylglucosaminyltransferase subunit GPI1	6546	7114	4368	5475	6430	1773	3208	3314
PF3D7_0618900.2			689	644	437	459	664	143	314	338
PF3D7_0619000		FPL domain-containing protein, putative	26809	30939	19755	24240	17562	4645	4193	4910
PF3D7_0619000.2			2769	3199	2085	2128	1814	639	369	415
PF3D7_0619100		conserved Plasmodium protein, unknown function	1597	1849	898	1203	1231	337	307	425
PF3D7_0619200		conserved Plasmodium protein, unknown function	11401	13536	7782	10187	9302	2004	2584	2977
PF3D7_0619300		conserved Plasmodium protein, unknown function	8012	11173	5215	6701	3982	1160	864	1123
PF3D7_0619400		cell division cycle protein 48 homologue, putative	25492	26905	22009	27809	17262	5430	17390	17074
PF3D7_0619500	ACS12	acyl-CoA synthetase	6533	7234	4400	5564	2022	571	831	859
PF3D7_0619600		conserved Plasmodium protein, unknown function	5110	6020	2436	2892	2305	1016	372	494
PF3D7_0619700		F-box protein FBXO1, putative	4796	6713	2916	2829	7745	2057	2905	3154
PF3D7_0619800		conserved Plasmodium membrane protein, unknown function	14187	21821	8919	10357	8493	2416	1819	2163
PF3D7_0619900	SF3A2	splicing factor 3A subunit 2, putative	4179	4815	3043	3686	3969	1456	2285	2369
PF3D7_0620000	PIMMS43	PIMMS43 protein	75	94	82	58	53	14	36	30
PF3D7_0620100	ATPTG12	ATP synthase-associated protein, putative	1295	1066	868	1412	450	201	353	289
PF3D7_0620200		conserved Plasmodium protein, unknown function	80	125	42	27	849	205	169	188
PF3D7_0620300		conserved Plasmodium protein, unknown function	544	688	386	503	7013	1869	1975	2621
PF3D7_0620400	MSP10	merozoite surface protein 10	279	387	130	106	2724	696	1356	1359
PF3D7_0620500		cleavage stimulation factor subunit 1, putative	2174	2724	1897	2496	2388	708	1103	1206
PF3D7_0620600		conserved Plasmodium protein, unknown function	492	729	222	235	670	244	93	120
PF3D7_0620700		DnaJ protein, putative	1801	1818	1097	1431	4062	955	7635	7464
PF3D7_0620800		tRNA Alanine	0	0	0	0	5	0	0	2
PF3D7_0620900		tRNA Leucine	1	6	8	2	10	2	2	3
PF3D7_0621000		conserved Plasmodium protein, unknown function	4989	6360	3699	3966	2207	891	869	960
PF3D7_0621100		conserved Plasmodium protein, unknown function	2553	2690	2006	2064	25099	6882	12949	13508
PF3D7_0621200	PDX1	pyridoxine biosynthesis protein PDX1	22076	44816	22663	18433	2683	989	1747	2036
PF3D7_0621300	PUF3	mRNA-binding protein PUF3	11759	14772	7149	7274	4002	1049	1364	1590
PF3D7_0621350	SYS1	protein SYS1, putative	58	71	26	18	248	77	259	348
PF3D7_0621400	ALV7	Pf77 protein	200	131	507	409	1869	908	1865	1862
PF3D7_0621500	RPP1	ribonuclease P/MRP protein subunit RPP1, putative	2361	2457	1610	1632	1946	556	1036	1212
PF3D7_0621600		tRNA Serine	14	14	4	11	7	4	14	11
PF3D7_0621700		RAP protein, putative	6383	7694	3778	4632	1832	505	338	352
PF3D7_0621800		nascent polypeptide-associated complex subunit alpha, putative	39701	48391	39318	42017	8995	2877	6144	5261
PF3D7_0621900	SRP68	signal recognition particle subunit SRP68, putative	10604	11570	7632	9650	5284	1581	2069	2110
PF3D7_0622000		conserved Plasmodium protein, unknown function	354	475	145	268	364	121	212	228
PF3D7_0622100		conserved Plasmodium protein, unknown function	771	903	343	406	2389	764	491	538
PF3D7_0622200	MIAB	tRNA-2-methylthio-N(6)-dimethylallyladenosine synthase	7068	9552	5559	7263	2836	855	1114	1204
PF3D7_0622300		vacuolar transporter chaperone, putative	2712	3118	1955	2255	651	293	383	335
PF3D7_0622400		conserved protein, unknown function	2014	2028	1228	1877	510	196	236	236
PF3D7_0622500		RNA methyltransferase, putative	6398	8707	3645	3094	2151	803	1154	1076
PF3D7_0622600	QCR9	cytochrome b-c1 complex subunit 9, putative	3543	3209	2792	3300	2591	1194	5813	5668
PF3D7_0622700		conserved Plasmodium membrane protein, unknown function	1727	2049	1281	1282	739	198	237	327
PF3D7_0622800		leucine--tRNA ligase, putative	25456	30942	19739	21238	10044	2856	2532	2592
PF3D7_0622900	AP2Tel	AP2 domain transcription factor AP2Tel	8517	12758	5544	7350	38005	9508	7902	9615
PF3D7_0623000	CS	chorismate synthase	7989	9473	6557	7068	2843	1366	2907	2820
PF3D7_0623100	NAB2	nuclear polyadenylated RNA-binding protein NAB2, putative	32187	42054	29930	35901	15085	3799	6719	6714
PF3D7_0623200	FNR	ferredoxin--NADP reductase	6790	8180	4779	5377	2691	1137	1573	1857
PF3D7_0623300		EGF-like membrane protein, putative	9041	9981	7062	8335	4216	1714	5545	4964
PF3D7_0623400	Mei2	MEI2-like RNA-binding protein	507	574	332	354	203	101	147	137
PF3D7_0623500	SOD2	superoxide dismutase [Fe]	2836	3392	2951	3496	1601	720	3940	2951
PF3D7_0623600		splicing factor-like protein 1, putative	8266	8936	6484	8695	4763	1354	2566	2536
PF3D7_0623700	SUV3	ATP-dependent RNA helicase SUV3, putative	7701	8894	5454	5555	4210	1330	991	1122
PF3D7_0623800	TKL4	tyrosine kinase-like protein, putative	10401	12007	6697	8056	53608	11318	11179	15075
PF3D7_0623900		ribonuclease H2 subunit A, putative	3995	5058	2715	3212	1101	557	791	753
PF3D7_0624000	HK	hexokinase	16642	16387	14993	19624	8350	2518	15305	13491
PF3D7_0624100		conserved protein, unknown function	8799	10785	5810	5980	7086	2454	2383	2599
PF3D7_0624200		SURP domain-containing protein, putative	20089	24389	12807	12873	15883	5325	4004	4755
PF3D7_0624300		CPW-WPC family protein	878	1098	757	689	593	210	168	289
PF3D7_0624400		conserved protein, unknown function	15577	20021	10100	9667	8552	2610	1493	1905
PF3D7_0624500	APC11	anaphase-promoting complex subunit 11, putative	10631	13484	7787	6739	15261	4778	10083	12517
PF3D7_0624600	ISWI	ISWI chromatin-remodeling complex ATPase	38048	52211	29598	38621	59743	12263	17433	22031
PF3D7_0624700	PIGL	N-acetylglucosaminyl-phosphatidylinositol de-N-acetylase, putative	3205	3534	2359	3354	1780	550	1421	1552
PF3D7_0624800		conserved Plasmodium protein, unknown function	164	134	73	92	749	228	206	235
PF3D7_0624900		GAS8-like protein, putative	1639	1603	1063	1079	838	291	362	343
PF3D7_0625000	SMS1	sphingomyelin synthase 1, putative	631	869	449	653	4825	1420	3387	3683
PF3D7_0625000.2			404	623	242	345	2880	825	1731	2018
PF3D7_0625100	SMS2	sphingomyelin synthase 2, putative	152	128	97	62	414	183	201	183
PF3D7_0625200		conserved Plasmodium protein, unknown function	2640	3579	1993	1783	4075	1678	1326	1590
PF3D7_0625300	MtDNAP	mitochondrial DNA polymerase	10743	16070	6450	8492	10356	2791	1809	2456
PF3D7_0625400		conserved Plasmodium protein, unknown function	1982	2430	1362	1398	9774	2665	6240	6680
PF3D7_0625500		conserved Plasmodium membrane protein, unknown function	1107	1645	1468	1322	1387	807	985	1106
PF3D7_0625600	PAP	poly(A) polymerase PAP, putative	392	699	311	368	391	219	151	171
PF3D7_0625700		conserved protein, unknown function	4281	4401	3164	3491	1735	517	927	991
PF3D7_0625800		conserved Plasmodium protein, unknown function	2156	2261	1157	1586	1300	346	274	379
PF3D7_0625900		conserved Plasmodium protein, unknown function	135	207	94	107	34	15	53	18
PF3D7_0626000		conserved Plasmodium protein, unknown function	8028	9849	4356	6463	4282	928	963	1060
PF3D7_0626100		oxidoreductase, short-chain dehydrogenase family, putative	12782	15648	10504	9453	5418	2064	3890	4446
PF3D7_0626200		conserved Plasmodium protein, unknown function	3584	4275	2430	2283	1577	507	655	765
PF3D7_0626300	FabB/FabF	3-oxoacyl-acyl-carrier protein synthase I/II	1091	1378	908	1083	462	136	469	446
PF3D7_0626400		CRAL/TRIO domain-containing protein, putative	3126	5910	3113	2855	5714	1470	1573	1725
PF3D7_0626500	CEP135	centrosomal protein CEP135, putative	197	318	85	110	424	136	74	145
PF3D7_0626600		conserved Plasmodium protein, unknown function	261	337	175	270	239	53	185	153
PF3D7_0626700		ATPase	8668	8790	7400	9357	2704	864	2312	1899
PF3D7_0626800	PyrK	pyruvate kinase	187000	181396	161516	201406	36442	9959	58350	53862
PF3D7_0626840		small nucleolar RNA snoR35	183	216	102	109	82	28	51	60
PF3D7_0626900		ribosomal protein L46, mitochondrial, putative	3120	3780	2439	2724	1178	512	512	426
PF3D7_0627000		conserved Plasmodium protein, unknown function	542	634	376	324	311	125	125	100
PF3D7_0627100		ankyrin-repeat protein, putative	9780	12965	8542	9789	17626	5359	7178	7906
PF3D7_0627200		myosin light chain, putative	3341	3588	1652	2245	2004	913	946	1013
PF3D7_0627300	RNF5	E3 ubiquitin-protein ligase RNF5, putative	18188	17746	13440	17366	17259	4605	12583	12626
PF3D7_0627400	TIM22	mitochondrial import inner membrane translocase subunit TIM22, putative	1828	1927	1386	1451	484	182	398	462
PF3D7_0627500	DJ1	protein DJ-1	19083	18921	14469	22513	1950	691	3653	3387
PF3D7_0627600		conserved Plasmodium protein, unknown function	1342	2056	989	1019	334	109	136	120
PF3D7_0627700		transportin	7699	9841	6587	11547	5518	1702	4762	3928
PF3D7_0627800	ACAS	acetyl-CoA synthetase	18689	19405	12979	14811	17153	4421	8016	7938
PF3D7_0627900	POP4	ribonuclease P protein subunit p29, putative	3307	3242	2513	3634	2664	730	2761	2083
PF3D7_0628000	PTPS	6-pyruvoyltetrahydropterin synthase	1552	1808	913	1218	737	305	388	396
PF3D7_0628100	HECT1	HECT domain-containing protein 1, putative	1316	1966	899	1122	74477	19946	14339	19016
PF3D7_0628200	PK4	eukaryotic translation initiation factor 2-alpha kinase	25939	36769	21449	24694	27007	7135	6922	8202
PF3D7_0628300	CEPT	choline/ethanolaminephosphotransferase, putative	49201	52265	40286	45109	311075	85616	286955	328284
PF3D7_0628400		protease, putative	72	58	16	61	578	288	533	582
PF3D7_0628500		conserved Plasmodium protein, unknown function	3684	4335	2416	1798	1678	525	370	491
PF3D7_0628600		DNA methyltransferase 1-associated protein 1, putative	12139	13344	9932	9944	4216	1710	2023	1835
PF3D7_0628700		conserved Plasmodium protein, unknown function	4140	5862	3232	3490	1525	511	475	489
PF3D7_0628800	GATB	glutamyl-tRNA(Gln) amidotransferase subunit B	4757	6053	3847	4751	1460	582	761	828
PF3D7_0628900		RAP protein, putative	4982	6451	3627	4059	792	243	240	243
PF3D7_0629000	GNA1	glucosamine 6-phosphate N-acetyltransferase	1079	1137	628	650	260	111	82	64
PF3D7_0629100	NAPRT	nicotinate phosphoribosyltransferase, putative	10697	12358	7646	9474	4457	1161	2243	1856
PF3D7_0629200		DnaJ protein, putative	12672	15150	9581	13125	5145	1520	2831	2472
PF3D7_0629300	PL	phospholipase, putative	254	322	186	203	16542	4315	11617	13195
PF3D7_0629400	PABP3	polyadenylate-binding protein 3, putative	8533	9670	5256	7553	3135	938	877	1012
PF3D7_0629500	AAT1	amino acid transporter AAT1	12713	14796	8182	10747	10475	3167	3921	4225
PF3D7_0629600		ribosomal RNA-processing protein 7, putative	5453	6389	3676	3681	6204	1793	3955	4404
PF3D7_0629700	SET1	SET domain protein, putative	36957	60701	25380	28434	37038	9360	6658	9347
PF3D7_0629800		cullin-2, putative	10257	11122	6690	8763	7648	1926	1855	2206
PF3D7_0629900		CRAL/TRIO domain-containing protein, putative	5896	6654	4535	5274	4301	1627	3169	3046
PF3D7_0630000		CPW-WPC family protein	27	13	4	5	53	9	10	22
PF3D7_0630100		alpha/beta hydrolase, putative	722	921	586	721	2445	742	1293	1093
PF3D7_0630200	PSOP6	secreted ookinete protein, putative	40	28	6	12	383	198	263	246
PF3D7_0630300		DNA polymerase epsilon catalytic subunit A, putative	15108	19915	8149	11320	10009	3453	2009	2171
PF3D7_0630400		conserved Plasmodium protein, unknown function	479	536	310	310	3443	962	845	1125
PF3D7_0630500	YTM1	ribosome biogenesis protein YTM1, putative	5103	5191	3829	4615	965	248	387	386
PF3D7_0630600		deubiquitinating enzyme MINDY, putative	7920	8334	6259	8191	9230	2636	6340	5683
PF3D7_0630700		bifunctional methylenetetrahydrofolate dehydrogenase/cyclohydrolase, putative	2366	3814	1960	1540	2862	913	988	1086
PF3D7_0630800		TPH domain-containing protein, putative	192	256	144	141	1347	307	295	389
PF3D7_0630900	HAS1	ATP-dependent RNA helicase HAS1	4973	5360	3394	4827	1789	542	608	604
PF3D7_0631000		tetratricopeptide repeat protein, putative	1408	1930	1010	1170	4267	1260	2878	2763
PF3D7_0631100		Plasmodium exported protein (PHISTb), unknown function	103	178	80	86	36	10	5	18
PF3D7_0631200	VAR	erythrocyte membrane protein 1 (PfEMP1), pseudogene	3	29	17	10	9	10	14	20
PF3D7_0631300	EPF1	exported protein family 1	0	0	0	0	0	0	0	0
PF3D7_0631400	MC-2TM	Pfmc-2TM Maurer's cleft two transmembrane protein	24	25	25	28	11	18	12	6
PF3D7_0631500	EPF3	exported protein family 3	0	2	0	2	4	0	0	2
PF3D7_0631600	EPF4	exported protein family 4	1	2	0	0	0	0	0	1
PF3D7_0631700		rifin, pseudogene	0	0	0	0	0	1	0	3
PF3D7_0631800	RIF	rifin	20	2	4	3	5	4	4	15
PF3D7_0631900		stevor	55	52	32	11	14	6	6	4
PF3D7_0632000	RIF	rifin	1	12	1	2	10	2	16	7
PF3D7_0632100	RIF	rifin	4	7	4	2	2	6	5	4
PF3D7_0632200	RIF	rifin	2	11	7	12	4	4	4	11
PF3D7_0632250		Plasmodium exported protein, unknown function, fragment, pseudogene	0	7	0	0	1	0	6	0
PF3D7_0632300	RIF	rifin	15	36	12	14	33	19	26	26
PF3D7_0632400	RIF	rifin	111	145	128	162	244	106	385	329
PF3D7_0632500	VAR	erythrocyte membrane protein 1, PfEMP1	602	759	440	524	446	172	251	220
PF3D7_0632600	RIF	rifin, pseudogene	0	12	1	10	31	8	7	4
PF3D7_0632700	RIF	rifin	30	51	56	30	46	44	101	83
PF3D7_0632800	VAR	erythrocyte membrane protein 1, PfEMP1	826	1112	557	853	2453	608	1086	1287
PF3D7_0700100	VAR	erythrocyte membrane protein 1, PfEMP1	53	73	16	29	60	49	45	67
PF3D7_0700200	RIF	rifin	10	14	16	12	14	6	12	9
PF3D7_0700300	RIF	rifin	4	8	0	2	5	7	0	5
PF3D7_0700400		stevor	8	6	1	0	25	15	6	8
PF3D7_0700500	RIF	rifin	9	9	27	2	17	2	8	11
PF3D7_0700600		Plasmodium exported protein, unknown function, pseudogene	2	5	3	0	6	11	2	4
PF3D7_0700700		stevor, pseudogene	11	6	17	4	4	6	4	1
PF3D7_0700800	MC-2TM	Pfmc-2TM Maurer's cleft two transmembrane protein	116	131	87	110	20	12	12	3
PF3D7_0700900	EPF1	exported protein family 1, pseudogene	24	15	0	0	12	2	4	11
PF3D7_0701000		erythrocyte membrane protein 1 (PfEMP1), pseudogene	0	5	2	0	1	2	0	0
PF3D7_0701100	RIF	rifin	12	0	4	4	15	2	12	14
PF3D7_0701200	RIF	rifin, pseudogene	5	13	3	2	16	4	2	4
PF3D7_0701300	RIF	rifin, pseudogene	0	0	0	0	0	0	0	0
PF3D7_0701400	EPF4	exported protein family 4, pseudogene	3	2	1	4	0	0	3	0
PF3D7_0701500	EPF3	exported protein family 3	0	0	1	1	0	4	0	1
PF3D7_0701600	MC-2TM	Pfmc-2TM Maurer's cleft two transmembrane protein	101	98	68	106	53	15	16	16
PF3D7_0701700	EPF1	exported protein family 1	0	0	0	2	1	1	2	0
PF3D7_0701800	RIF	rifin	2	2	2	8	9	4	6	2
PF3D7_0701900		Plasmodium exported protein, unknown function	101	90	49	69	9423	2216	2839	3679
PF3D7_0702000		Plasmodium exported protein (hyp12), unknown function	464	573	294	265	53573	14792	11184	13112
PF3D7_0702100		Plasmodium exported protein (PHISTb), unknown function, pseudogene	156	172	129	171	37286	7950	8352	9360
PF3D7_0702200	LPL20	lysophospholipase LPL20	411	654	443	385	17010	5190	11430	13043
PF3D7_0702300	STARP	sporozoite threonine and asparagine-rich protein	192	240	132	122	5989	1306	1591	1720
PF3D7_0702400	SEMP1	small exported membrane protein 1	5126	6678	5237	5308	2352	735	1428	1613
PF3D7_0702500		Plasmodium exported protein, unknown function	3917	3856	3560	5728	925	277	1228	962
PF3D7_0702600		chitinase, fragment	7	10	8	13	133	86	97	62
PF3D7_0702700		tRNA Alanine	1	1	4	0	1	0	1	1
PF3D7_0702800		tRNA Tyrosine	0	0	0	0	0	0	1	3
PF3D7_0702900		centrin, putative	4065	4475	3325	3834	1858	702	1358	1291
PF3D7_0703000		conserved Plasmodium protein, unknown function	2557	3027	1376	2165	1470	380	394	404
PF3D7_0703100	CIA2	cytosolic iron-sulfur assembly component 2, putative	866	1049	498	674	512	152	122	139
PF3D7_0703200		conserved Plasmodium protein, unknown function	12127	15721	9032	10799	10087	2942	2376	2984
PF3D7_0703300		conserved Plasmodium protein, unknown function	2849	3212	2335	2536	1300	367	1685	1987
PF3D7_0703400		conserved Plasmodium protein, unknown function	1632	2087	1190	1248	851	240	259	249
PF3D7_0703500		erythrocyte membrane-associated antigen	43016	50391	26104	38169	21952	5744	6498	6607
PF3D7_0703600		conserved protein, unknown function	10872	11229	7181	7819	34239	10508	23240	23925
PF3D7_0703700		conserved protein, unknown function	8839	10744	7273	7700	2911	797	2672	2722
PF3D7_0703800		conserved Plasmodium protein, unknown function	210	237	89	128	278	96	76	158
PF3D7_0703900		conserved Plasmodium membrane protein, unknown function	11251	17427	6736	8025	4872	1621	668	954
PF3D7_0704000		conserved Plasmodium membrane protein, unknown function	6837	8880	3786	4684	2590	1074	449	588
PF3D7_0704100	BTP2	basal complex transmembrane protein 2	15506	22338	8342	10417	110705	25523	13808	22481
PF3D7_0704200	NSUN1	RNA cytosine C(5)-methyltransferase, putative	2442	2709	1710	2572	1142	300	186	258
PF3D7_0704300		conserved Plasmodium membrane protein, unknown function	29116	38775	15354	19826	58074	13829	8480	11933
PF3D7_0704400		phosphoinositide-binding protein, putative	7092	7165	4715	5698	9824	3543	5545	5405
PF3D7_0704500		serine/threonine protein kinase, putative	2934	5360	2353	2113	17597	5515	4497	5026
PF3D7_0704600	UT	HECT-type E3 ubiquitin ligase UT	56464	81922	39933	48670	69055	17129	13551	18026
PF3D7_0704700	PPAT	phosphopantetheine adenylyltransferase, putative	7177	10442	4067	4524	8537	2394	1592	1824
PF3D7_0704800	PPM12	protein phosphatase PPM12, putative	1152	1252	841	1316	3650	1028	1564	1541
PF3D7_0704900	RF2	peptide chain release factor 2	1930	1983	1574	1834	1548	363	710	886
PF3D7_0705000		mRNA cap guanine-N7 methyltransferase, putative	15612	22632	11302	12685	7383	1988	1817	2009
PF3D7_0705100		conserved Plasmodium protein, unknown function	2246	2697	1164	1333	10442	3045	1642	2100
PF3D7_0705200		conserved Plasmodium protein, unknown function	2797	3252	1340	1603	1355	304	137	244
PF3D7_0705300	ORC2	origin recognition complex subunit 2	11503	16685	8264	8227	16232	4277	3150	3587
PF3D7_0705400	MCM7	DNA replication licensing factor MCM7	24290	26810	18533	22517	21818	7168	15493	16139
PF3D7_0705500		inositol-phosphate phosphatase, putative	13860	14487	9294	13081	51370	11673	14561	17365
PF3D7_0705600		RNA helicase, putative	2306	2838	1569	2055	635	157	143	136
PF3D7_0705700		40S ribosomal protein S29, putative	65161	70369	44721	45198	23822	8163	11163	11541
PF3D7_0705800	CRISP	cysteine-rich secretory protein	1499	1766	811	810	373	192	128	123
PF3D7_0705900		ATP synthase subunit C, putative	31027	31524	22013	25898	11492	3799	13095	13430
PF3D7_0706000		importin-7, putative	37162	46746	22335	26052	24115	7356	5510	6608
PF3D7_0706100		conserved Plasmodium protein, unknown function	4830	6683	3355	3620	5203	1820	1221	1447
PF3D7_0706200		conserved protein, unknown function	2127	2555	1825	1849	846	351	563	493
PF3D7_0706300		conserved Plasmodium protein, unknown function	545	748	354	363	21785	6779	11615	12291
PF3D7_0706400	RPL37	60S ribosomal protein L37	64489	88475	55551	40078	17581	5515	8012	9824
PF3D7_0706500		conserved Plasmodium protein, unknown function	29765	48862	23994	25134	22756	5900	6072	7073
PF3D7_0706600		conserved Plasmodium protein, unknown function	1522	1937	1038	1170	134	79	32	54
PF3D7_0706700	MSH2-2	DNA mismatch repair protein MSH2, putative	434	530	319	377	324	139	299	244
PF3D7_0706800		tRNA Threonine	0	4	1	0	12	2	14	9
PF3D7_0706900		tRNA Histidine	0	0	0	0	0	0	1	3
PF3D7_0707000		tRNA Lysine	1	3	0	0	1	0	0	0
PF3D7_0707100		tRNA Lysine	0	0	2	3	2	0	2	0
PF3D7_0707200		conserved Plasmodium protein, unknown function	9656	13660	6450	7146	18831	4358	3611	4623
PF3D7_0707300	RAMA	rhoptry-associated membrane antigen	7534	10002	9515	9277	252139	58483	97200	98298
PF3D7_0707400		AAA family ATPase, putative	14645	16371	9109	10766	2957	1007	806	854
PF3D7_0707420		nucleolar RNA snoR36	199	167	88	174	60	26	68	77
PF3D7_0707500		conserved Plasmodium protein, unknown function	3526	3691	1750	2754	15741	3941	3708	4407
PF3D7_0707600	MED10	mediator of RNA polymerase II transcription subunit 10, putative	2732	2772	1869	2013	3606	1360	1225	1308
PF3D7_0707700		E3 ubiquitin-protein ligase, putative	17089	23208	13674	15049	20450	6018	9421	9225
PF3D7_0707800		RAP protein, putative	10488	15325	7195	9449	5491	1595	1750	1794
PF3D7_0707900		ribosomal protein S8e, putative	4751	5108	3490	4784	1918	489	1449	1285
PF3D7_0708000		cytoskeleton associated protein, putative	4159	4958	3278	3859	838	292	357	336
PF3D7_0708100	RPB10	DNA-directed RNA polymerases I, II, and III subunit RPABC5, putative	7150	7627	5253	4793	2430	647	1164	1362
PF3D7_0708200		conserved Plasmodium protein, unknown function	133	168	97	121	102	24	18	42
PF3D7_0708300	BUD32	EKC/KEOPS complex subunit BUD32	1265	1274	1000	1752	285	98	354	231
PF3D7_0708400	HSP90	heat shock protein 90	377559	528970	341371	371926	72204	22057	44338	43617
PF3D7_0708500		heat shock protein 86 family protein	11080	17116	9766	10879	3378	986	1086	1142
PF3D7_0708600	IMC1d	inner membrane complex protein 1d, putative	89	92	64	84	133	42	77	41
PF3D7_0708700	COX4	cytochrome c oxidase subunit 4, putative	5323	5223	4203	4344	4547	1433	4483	4925
PF3D7_0708800	HSP110c	heat shock protein 110	86645	116655	73020	80800	27117	7086	7484	7982
PF3D7_0708900	SCO1	protein SCO1, putative	2158	3074	1565	1776	1278	398	1139	1168
PF3D7_0709000	CRT	chloroquine resistance transporter	15709	13699	11270	14499	8688	2843	7305	7493
PF3D7_0709050		small nucleolar RNA	378	844	299	138	579	291	161	320
PF3D7_0709100		Cg1 protein	18896	27932	15334	14347	14229	4368	4967	5357
PF3D7_0709200	GLP3	glutaredoxin-like protein	217	328	104	109	114	65	40	66
PF3D7_0709300	MED14	mediator of RNA polymerase II transcription subunit 14, putative	6468	9258	4634	5121	2177	791	792	806
PF3D7_0709400		Cg7 protein	5051	6974	5549	6051	4076	2298	2913	3241
PF3D7_0709500		nucleic acid-binding protein, putative	3914	4139	2948	2906	2179	645	936	871
PF3D7_0709600	POP1	ribonucleases P/MRP protein subunit POP1, putative	9266	10763	6631	7016	2571	708	628	782
PF3D7_0709700	PARE	prodrug activation and resistance esterase	4602	5716	3329	3633	6438	2047	5456	4879
PF3D7_0709800		conserved protein, unknown function	508	445	408	505	648	301	615	648
PF3D7_0709900		hydrolase, putative	1336	1776	1021	1287	2587	814	1061	1185
PF3D7_0710000		conserved Plasmodium protein, unknown function	8384	11510	5301	6658	11351	3341	2329	2854
PF3D7_0710100		conserved protein, unknown function	6304	7664	4402	4234	4407	1476	1849	1674
PF3D7_0710200		conserved Plasmodium protein, unknown function	49752	79278	32161	41349	44845	9327	8020	11539
PF3D7_0710300		conserved protein, unknown function	2440	2770	2107	2901	391	126	686	445
PF3D7_0710400	RAD14	DNA repair protein RAD14, putative	5288	7365	3801	3371	2154	824	558	751
PF3D7_0710500		conserved protein, unknown function	8242	8900	5708	6111	1223	391	741	862
PF3D7_0710600	RPL34	60S ribosomal protein L34	75875	89277	61705	64198	20353	7984	15053	14621
PF3D7_0710700		conserved Plasmodium protein, unknown function	19820	28014	15356	11375	9270	2452	2553	2870
PF3D7_0710800	USE1	protein transport protein USE1, putative	4380	5799	3759	4198	1868	645	1200	1093
PF3D7_0710900	RPL1	50S ribosomal protein L1, mitochondrial, putative	7104	7923	5376	5128	2736	753	1466	1327
PF3D7_0711000	CDC48	AAA family ATPase, CDC48 subfamily	10509	21368	11649	11536	2381	705	881	869
PF3D7_0711100		conserved protein, unknown function	548	671	306	394	816	322	364	373
PF3D7_0711200		conserved Plasmodium protein, unknown function	539	649	392	341	907	305	172	180
PF3D7_0711300		conserved Plasmodium protein, unknown function	4960	5531	3144	3497	2191	755	715	754
PF3D7_0711400	SAP18	histone deacetylase complex subunit SAP18, putative	12026	18527	10206	9170	4321	969	1152	1330
PF3D7_0711500		regulator of chromosome condensation, putative	34917	41881	26454	22863	12541	3666	2491	2935
PF3D7_0711600		Plasmodium RNA of unknown function RUF6	0	0	0	0	0	0	0	0
PF3D7_0711700	VAR	erythrocyte membrane protein 1, PfEMP1	81	327	237	70	378	45	161	279
PF3D7_0711800		Plasmodium RNA of unknown function RUF6	0	0	1	0	0	0	0	0
PF3D7_0711900	RIF	rifin, pseudogene	0	11	7	4	22	5	3	8
PF3D7_0712000	VAR	erythrocyte membrane protein 1, PfEMP1	129	188	102	120	143	70	77	82
PF3D7_0712100		Plasmodium RNA of unknown function RUF6	0	2	0	1	2	0	0	7
PF3D7_0712200	RIF	rifin, pseudogene	4	22	11	0	10	8	7	2
PF3D7_0712300	VAR	erythrocyte membrane protein 1, PfEMP1	63	62	42	43	71	40	48	55
PF3D7_0712400	VAR	erythrocyte membrane protein 1, PfEMP1	28	45	59	36	69	30	67	56
PF3D7_0712500	RIF	rifin, pseudogene	4	23	5	1	26	6	4	6
PF3D7_0712600	VAR	erythrocyte membrane protein 1, PfEMP1	82	42	45	28	62	45	59	66
PF3D7_0712700		Plasmodium RNA of unknown function RUF6	4	7	1	0	1	6	1	0
PF3D7_0712800	VAR	erythrocyte membrane protein 1, PfEMP1	110	141	73	85	220	89	120	121
PF3D7_0712900	VAR	erythrocyte membrane protein 1, PfEMP1	126	193	150	100	162	106	110	126
PF3D7_0713000	RIF	rifin	8	44	10	6	3	1	6	10
PF3D7_0713100	MC-2TM	Pfmc-2TM Maurer's cleft two transmembrane protein	213	188	133	158	111	33	50	51
PF3D7_0713200	EPF1	exported protein family 1	28	16	8	15	32	24	22	22
PF3D7_0713300	VAR	erythrocyte membrane protein 1 (PfEMP1), pseudogene	6	22	18	6	43	23	18	24
PF3D7_0713400	SR25	GPCR-like receptor SR25	3063	3614	2524	2967	3712	1256	1721	1707
PF3D7_0713500		conserved Plasmodium protein, unknown function	2192	2382	1067	1314	3496	1074	780	1017
PF3D7_0713600		ribosomal protein S5, mitochondrial, putative	2714	2696	1559	2606	1316	415	449	396
PF3D7_0713700		conserved Plasmodium protein, unknown function	10756	13378	10079	9670	9610	2541	4551	5124
PF3D7_0713800	NELFA	negative elongation factor A, putative	2643	3431	1597	1592	20468	7033	4360	5640
PF3D7_0713900		conserved Plasmodium protein, unknown function	17269	21201	10283	16533	11692	2897	3202	3463
PF3D7_0714000	H2B.Z	histone H2B variant	76072	93596	67115	63316	172860	48626	97170	110202
PF3D7_0714100		MAATS1 domain-containing protein, putative	19	34	25	31	116	36	28	44
PF3D7_0714200		conserved Plasmodium protein, unknown function	4825	5696	3098	4118	8256	1845	2430	2784
PF3D7_0714300	DHHC4	palmitoyltransferase DHHC4, putative	10698	14223	7580	7233	7325	1939	2321	2360
PF3D7_0714400		calmodulin, putative	1580	1568	1014	1082	500	165	197	192
PF3D7_0714500		transcription elongation factor s-II, putative	4982	6185	4000	4473	2661	743	950	899
PF3D7_0714600		conserved protein, unknown function	9598	13139	6144	6738	6877	2033	1714	2000
PF3D7_0714700		tRNA Asparagine	0	0	0	0	1	0	0	0
PF3D7_0714800		tRNA Leucine	0	2	2	2	9	0	2	2
PF3D7_0714900		tRNA Serine	1	0	0	0	2	0	0	0
PF3D7_0715000	PNPase	4-nitrophenylphosphatase	11610	13913	9499	9190	2587	860	2371	2321
PF3D7_0715100	MYCBP	C-Myc-binding protein, putative	61	48	22	37	190	71	111	184
PF3D7_0715200		conserved Plasmodium protein, unknown function	8849	9249	5187	8153	11624	3225	3148	3424
PF3D7_0715300		calcium/calmodulin-dependent protein kinase, putative	3012	3618	2337	2483	3279	1024	2920	2840
PF3D7_0715400	PSOP20	secreted ookinete protein, putative	6543	7540	4422	5571	2339	869	560	715
PF3D7_0715500		ATP synthase subunit epsilon, mitochondrial, putative	2587	2781	1995	2295	662	250	541	496
PF3D7_0715600		GTP-binding translation elongation factor tu family protein, putative	15329	16591	12608	12421	6249	1953	4567	4372
PF3D7_0715700		conserved protein, unknown function	1681	1876	1065	1063	681	186	411	373
PF3D7_0715800	DMT1	drug/metabolite transporter DMT1, putative	7392	8089	4983	6730	2542	946	4319	4318
PF3D7_0715900	CDF	cation diffusion facilitator family protein, putative	24319	32720	18230	20300	10570	4036	6523	5751
PF3D7_0716000		RNA-binding protein, putative	10374	16144	10184	11091	3862	872	1155	1158
PF3D7_0716100	SDA1	protein SDA1, putative	10863	15376	8371	8165	3592	1123	1060	1166
PF3D7_0716200		PDCD2 domain-containing protein, putative	6065	7796	6633	8329	3201	1013	2838	2542
PF3D7_0716300		conserved protein, unknown function	43145	46829	30375	40966	20312	5502	8741	8133
PF3D7_0716400		transcription initiation factor IIA subunit 1, putative	23163	30501	20339	17552	14231	5045	4791	4896
PF3D7_0716500		conserved Plasmodium protein, unknown function	10335	11951	8444	9085	3742	1785	3044	3282
PF3D7_0716600	SufS	cysteine desulfurase	1461	1972	1402	1362	603	234	429	392
PF3D7_0716700		conserved Plasmodium protein, unknown function	3066	4185	2400	2340	1294	357	377	391
PF3D7_0716800	EIF3I	eukaryotic translation initiation factor 3 subunit I, putative	31346	50233	33679	29171	6802	2477	5365	5825
PF3D7_0716900	DMT2	drug/metabolite transporter DMT2	10402	15907	9178	8339	3078	800	1327	1296
PF3D7_0717000		conserved Plasmodium membrane protein, unknown function	3073	3152	2200	2717	3523	1492	5157	4471
PF3D7_0717100		CRAL/TRIO domain-containing protein, putative	10917	12445	8446	9936	4442	1256	2843	2488
PF3D7_0717200		conserved Plasmodium protein, unknown function	6173	6201	4054	4633	15825	5410	7499	7876
PF3D7_0717300		transcription initiation factor IIE subunit alpha, putative	2727	3832	2390	2490	5536	1827	3421	3394
PF3D7_0717400		queuine tRNA-ribosyltransferase, putative	7255	8916	6117	6952	6610	2028	2190	2376
PF3D7_0717500	CDPK4	calcium-dependent protein kinase 4	7472	8194	5960	5514	47577	12603	27452	30731
PF3D7_0717600	IMC32	inner membrane complex protein, putative	14043	16389	9453	9335	31851	10839	6882	7952
PF3D7_0717700		serine--tRNA ligase, putative	38206	41699	31467	32187	17807	4861	11789	12425
PF3D7_0717800		conserved Plasmodium protein, unknown function	1158	1948	933	871	539	221	140	229
PF3D7_0717900		thioredoxin-like protein	2804	2909	2067	3328	454	120	217	284
PF3D7_0718000		dynein heavy chain, putative	607	758	323	363	386	187	158	200
PF3D7_0718100	EST	exported serine/threonine protein kinase	5492	6694	3482	4875	2774	949	785	1007
PF3D7_0718300	CRMP2	cysteine repeat modular protein 2	85	117	108	69	264	96	77	96
PF3D7_0718400		ribosomal protein S8, mitochondrial, putative	14801	16890	11230	11243	13699	4922	9928	11506
PF3D7_0718500		prefoldin subunit 3, putative	22218	23752	19401	23032	7881	3829	12709	11906
PF3D7_0718600		conserved Plasmodium protein, unknown function	2068	2254	1400	1282	4221	1273	1316	1617
PF3D7_0718700		conserved Plasmodium membrane protein, unknown function	2683	3022	1722	2027	741	262	298	309
PF3D7_0718800		conserved protein, unknown function	57	46	39	60	73	12	82	70
PF3D7_0718900		conserved Plasmodium protein, unknown function	19	26	0	14	28	25	6	11
PF3D7_0719000		conserved protein, unknown function	4753	4762	3504	4497	653	356	1101	993
PF3D7_0719100		ATP synthase F0 subunit a-like protein, putative	8179	9728	6221	6366	4040	1436	2758	2592
PF3D7_0719200	NEK4	NIMA related kinase 4	214	256	159	186	337	108	186	322
PF3D7_0719300	ARP6	actin-related protein ARP6	13338	17446	10633	10451	4057	1384	1800	1642
PF3D7_0719400		conserved Plasmodium protein, unknown function	13468	19108	9874	9283	15484	3829	3811	4683
PF3D7_0719500	CDC50A	LEM3/CDC50 family protein, putative	8167	9930	6268	6419	11358	3612	4911	5199
PF3D7_0719600		60S ribosomal protein L11a, putative	52506	63308	42213	42888	10551	3450	6727	6880
PF3D7_0719700	RPS10	40S ribosomal protein S10, putative	191966	258884	153590	111176	52985	12770	17212	22841
PF3D7_0719800		conserved protein, unknown function	5310	7026	3095	3523	5744	1459	1152	1314
PF3D7_0719900		conserved Plasmodium membrane protein, unknown function	15027	21688	11057	13694	9584	2456	2804	3099
PF3D7_0720000	CSL4	exosome complex component CSL4, putative	5374	6563	3655	3296	3538	1168	1159	1401
PF3D7_0720100	ESF2	pre-rRNA-processing protein ESF2, putative	5729	7351	4021	3769	2565	795	620	721
PF3D7_0720200		conserved protein, unknown function	8139	7658	5124	5638	1983	763	1008	935
PF3D7_0720300		conserved Plasmodium protein, unknown function	27	20	23	20	227	135	234	225
PF3D7_0720400	AIF	apoptosis-inducing factor, putative	14028	15981	10696	11013	4528	1368	1804	1850
PF3D7_0720500		conserved Plasmodium protein, unknown function	5868	6803	4751	5946	2740	908	2371	2173
PF3D7_0720600		conserved protein, unknown function	15301	16983	13086	15108	7343	2249	5242	5464
PF3D7_0720700	PX1	phosphoinositide-binding protein PX1	13122	16795	9142	10267	54757	11649	11243	16137
PF3D7_0720800		Ham1-like protein, putative	8928	13415	7807	8048	2883	990	1749	2421
PF3D7_0720900		tetratricopeptide repeat protein, putative	2585	3024	1957	2380	1105	347	645	682
PF3D7_0721000		conserved Plasmodium membrane protein, unknown function	27547	48616	18962	18769	24679	6637	4733	6001
PF3D7_0721100		conserved protein, unknown function	87465	82541	61287	77796	24811	6899	28411	26349
PF3D7_0721200		conserved Plasmodium protein, unknown function	2884	3723	1911	2098	2025	605	1093	1547
PF3D7_0721300	DDX31	ATP-dependent DNA helicase DDX31	10289	13774	8974	8642	2949	887	756	886
PF3D7_0721400		rhoptry protein, putative	21870	24339	18679	15096	10820	3104	6425	7953
PF3D7_0721500		conserved Plasmodium membrane protein, unknown function	3254	4402	1840	2052	2625	715	548	495
PF3D7_0721600		40S ribosomal protein S5, putative	78545	93461	71176	80802	22444	7311	22422	21977
PF3D7_0721700	PSOP1	secreted ookinete protein, putative	71	62	16	36	59	24	74	108
PF3D7_0721800		conserved Plasmodium protein, unknown function	18151	19721	12908	12364	10617	3098	3668	4270
PF3D7_0721900		V-type ATPase V0 subunit e, putative	4079	4547	2383	2800	4508	1805	4313	4617
PF3D7_0722000		conserved Plasmodium protein, unknown function	8234	8943	5623	5463	6760	2465	5392	5871
PF3D7_0722100	PELO	protein pelota homolog, putative	2603	2718	2097	2388	2806	1109	1489	1836
PF3D7_0722200	RALP1	rhoptry-associated leucine zipper-like protein 1	1916	2683	1347	1891	81810	17991	28428	30913
PF3D7_0722300		ubiquitin carboxyl-terminal hydrolase, putative	7526	9832	4471	5424	9420	3130	2444	2650
PF3D7_0722400	OLA1	Obg-like ATPase 1, putative	23876	23741	17908	22972	8798	3039	7270	7249
PF3D7_0722500	CWC15	pre-mRNA-splicing factor CWC15, putative	8803	10815	5869	6085	7810	2569	4813	4875
PF3D7_0722600	UTP7	U3 small nucleolar RNA-associated protein 7, putative	16000	21766	18602	16594	13883	7569	11295	12223
PF3D7_0722700	C3AP1	respiratory chain complex 3 associated protein 1	2725	2763	1644	1988	3572	1333	4189	4120
PF3D7_0722800		conserved protein, unknown function	56	62	56	56	242	81	136	153
PF3D7_0722900		conserved protein, unknown function	222	332	162	282	1236	559	998	1048
PF3D7_0723000		tRNAHis guanylyltransferase, putative	3607	3342	10337	9941	2827	6436	9387	9914
PF3D7_0723100	CPH1	protein CPH1, putative	72	94	43	73	311	89	129	193
PF3D7_0723200		conserved Plasmodium protein, unknown function	31	33	30	53	337	57	275	329
PF3D7_0723300		conserved protein, unknown function	2752	3149	2267	2855	20121	6696	10966	11229
PF3D7_0723400		conserved Plasmodium protein, unknown function	22292	32193	14159	18726	12125	2709	2561	3164
PF3D7_0723500		dynactin subunit 5, putative	397	349	258	311	154	60	124	124
PF3D7_0723600		proteasome assembly chaperone 4, putative	5259	5315	4479	5047	784	258	1035	948
PF3D7_0723700		metallo-hydrolase/oxidoreductase, putative	3197	4456	2567	2945	1138	338	372	293
PF3D7_0723800		conserved Plasmodium protein, unknown function	7963	11057	5608	8054	20722	6068	5905	6316
PF3D7_0723900		RNA-binding protein, putative	12519	14196	8680	8455	8869	2360	1609	2143
PF3D7_0724000		Rab GTPase activator and protein kinase, putative	5328	7928	3425	3153	5527	1520	1271	1575
PF3D7_0724100		conserved Plasmodium protein, unknown function	38812	55771	26644	29831	20091	4933	3639	5097
PF3D7_0724200	TAP42	type 2A phosphatase-associated protein 42, putative	4873	5853	3126	3464	1406	431	367	359
PF3D7_0724300	COQ3	ubiquinone biosynthesis O-methyltransferase, putative	1392	1516	1003	1078	593	255	441	442
PF3D7_0724400	PAM18	mitochondrial import inner membrane translocase subunit TIM14, putative	2647	3075	2225	2137	1498	478	1209	1444
PF3D7_0724500		conserved Plasmodium protein, unknown function	546	685	319	303	616	222	212	203
PF3D7_0724600		protein kinase, putative	13323	15200	6804	10040	16228	4397	2969	3642
PF3D7_0724700	BDP6	bromodomain protein 6, putative	17492	26910	11924	13111	10413	2555	2967	3407
PF3D7_0724800		kelch domain-containing protein, putative	3201	3010	2505	2944	5028	1434	3045	3029
PF3D7_0724900		kinesin-20, putative	113	159	54	68	3484	962	1054	1399
PF3D7_0725000		exonuclease I, putative	20268	26613	11397	13522	26463	6554	4119	5212
PF3D7_0725100		conserved Plasmodium membrane protein, unknown function	4775	6486	3613	4278	4675	1419	1830	2161
PF3D7_0725200		mago nashi protein homologue, putative	17116	18838	12321	10098	10129	3625	5731	6819
PF3D7_0725300		conserved protein, unknown function	5730	7372	4872	5061	5614	1684	1875	2256
PF3D7_0725400		conserved Plasmodium protein, unknown function	1204	1380	964	846	242837	80543	194465	237464
PF3D7_0725600		18S ribosomal RNA	0	0	0	0	0	0	0	0
PF3D7_0725800		5.8S ribosomal RNA	0	0	0	0	0	0	0	0
PF3D7_0726000		28S ribosomal RNA	0	0	0	0	0	0	0	0
PF3D7_0726050		conserved Plasmodium protein, unknown function	1398	1506	910	943	600	182	236	217
PF3D7_0726100		Plasmodium exported protein, unknown function	1621	3092	1713	1804	5823	1518	1850	1965
PF3D7_0726200	FIKK7.1	serine/threonine protein kinase, FIKK family	1473	1462	1514	2308	212	60	148	162
PF3D7_0726300	PMS1	DNA mismatch repair protein PMS1, putative	8728	12035	4732	4838	11099	3673	1347	1823
PF3D7_0726400		conserved Plasmodium membrane protein, unknown function	22178	28586	11172	16438	21410	6130	3598	4716
PF3D7_0726500		ubiquitin carboxyl-terminal hydrolase, putative	45325	60606	30737	38449	27044	6755	6515	7332
PF3D7_0726600		conserved Plasmodium protein, unknown function	4102	4549	2956	3296	2224	691	774	994
PF3D7_0726700		conserved Plasmodium protein, unknown function	3681	4296	2643	2626	3377	1175	1922	1995
PF3D7_0726800	OST2	dolichyl-diphosphooligosaccharide--protein glycosyltransferase subunit OST2, putative	618	728	364	707	64	54	83	87
PF3D7_0726900	TIM50	mitochondrial import inner membrane translocase subunit TIM50, putative	3866	4612	2779	3136	1011	412	392	376
PF3D7_0727000	VPS53	vacuolar protein sorting-associated protein 53, putative	6915	8264	4240	5191	4650	1412	998	1126
PF3D7_0727100		conserved protein, unknown function	963	938	671	815	559	221	256	280
PF3D7_0727200	NFS1	cysteine desulfurase IscS	2688	2744	2291	2901	786	165	451	500
PF3D7_0727300	DNMT	DNA (cytosine-5)-methyltransferase	4380	5905	3595	3848	1790	484	650	659
PF3D7_0727400		proteasome subunit alpha type-5, putative	26209	28130	21217	24585	12089	3745	17181	17131
PF3D7_0727500		mTERF domain-containing protein, putative	9807	11606	6004	6449	6544	1764	1124	1176
PF3D7_0727600		conserved Plasmodium protein, unknown function	3823	5048	2719	2554	957	270	185	273
PF3D7_0727700		conserved Plasmodium protein, unknown function	3495	4115	2172	2379	1970	597	483	538
PF3D7_0727800		cation transporting ATPase, putative	6322	7239	5364	7596	2713	647	1280	1350
PF3D7_0727900		conserved Plasmodium protein, unknown function	747	1152	752	795	848	257	245	318
PF3D7_0728000	eIF2alpha	eukaryotic translation initiation factor 2 subunit alpha	29695	35581	24924	22922	12665	3896	8152	9287
PF3D7_0728100		anaphase-promoting complex subunit 1, putative	13539	22519	7935	9384	10687	2611	1697	2499
PF3D7_0728200	ALP3	actin-like protein, putative	994	1177	817	978	866	264	313	333
PF3D7_0728300		conserved protein, unknown function	2544	3609	1963	1776	1688	522	972	1031
PF3D7_0728400		SDH5 domain-containing protein, putative	2485	2825	1568	1783	991	408	622	648
PF3D7_0728500		EF hand domain-containing protein, putative	346	393	160	176	455	181	137	201
PF3D7_0728600		RING zinc finger protein, putative	17218	24522	11425	12928	21092	5401	4556	5406
PF3D7_0728700		alpha/beta hydrolase, putative	634	1030	443	479	698	200	171	161
PF3D7_0728800		conserved Plasmodium protein, unknown function	18702	25735	13840	11044	6702	2123	1813	2144
PF3D7_0728900		RNA-binding protein, putative	8603	12933	7695	8719	3571	1058	1409	1424
PF3D7_0729000	SRP9	signal recognition particle subunit SRP9	1334	2442	969	1345	680	190	550	547
PF3D7_0729100		allantoicase, putative	2768	4366	1955	3381	2109	474	649	623
PF3D7_0729200	AOP	1-cys peroxiredoxin	833	880	576	996	180	69	186	136
PF3D7_0729300	NMD3	60S ribosomal export protein NMD3, putative	9241	9666	6235	8541	2956	832	1178	1328
PF3D7_0729400		ribosome biogenesis protein BRX1, putative	3878	4269	2556	3926	1078	339	563	636
PF3D7_0729500	MT-A70	N6-adenosine-methyltransferase MT-A70	5511	6385	4808	5688	4138	1137	2614	2419
PF3D7_0729600	CMC1	COX assembly mitochondrial protein, putative	6257	7264	5437	5013	4226	1080	1371	1621
PF3D7_0729700		zinc finger protein, putative	136	181	84	110	2156	579	720	795
PF3D7_0729800		dynein light chain, putative	26	23	4	8	819	305	236	323
PF3D7_0729900		dynein heavy chain, putative	687	914	544	544	594	247	231	206
PF3D7_0730000		conserved protein, unknown function	1303	1656	895	938	566	159	137	112
PF3D7_0730100		tRNA pseudouridine synthase D, putative	1504	1509	1023	1703	209	80	103	92
PF3D7_0730200		AP-4 complex subunit beta, putative	2425	3085	1682	1726	1609	512	466	499
PF3D7_0730300	ApiAP2	AP2 domain transcription factor AP2-L, putative	83888	117527	63015	86374	178592	57673	45465	51683
PF3D7_0730400	IMP2	IMP1-like protein, putative	584	736	567	414	20304	6212	22304	27402
PF3D7_0730500		conserved Plasmodium protein, unknown function	10134	13907	6759	9818	23662	4672	5441	7703
PF3D7_0730600		tRNA Valine	3	1	0	1	3	1	1	6
PF3D7_0730700		tRNA Threonine	2	7	0	3	1	0	2	1
PF3D7_0730800		Plasmodium exported protein, unknown function	2698	3319	2318	2487	38585	12043	25370	29067
PF3D7_0730900	PTP4	EMP1-trafficking protein	9346	12902	7437	11905	16048	4442	4882	4965
PF3D7_0731000		non-coding RNA	130	166	78	72	20436	4940	6229	6587
PF3D7_0731100	PTP2	EMP1-trafficking protein	5312	6965	5097	6364	24550	7245	12630	11647
PF3D7_0731200		Plasmodium exported protein, unknown function	1141	1409	885	833	8526	2765	3031	3200
PF3D7_0731300	PfG174	Plasmodium exported protein (PHISTb), unknown function	4105	7928	4081	4733	805	426	767	602
PF3D7_0731400	FIKK7.2	serine/threonine protein kinase, FIKK family, pseudogene	4869	5325	3723	3981	45953	13815	7154	9852
PF3D7_0731500	EBA175	erythrocyte binding antigen-175	691	755	685	788	111951	26662	63027	68215
PF3D7_0731600	ACS5	acyl-CoA synthetase	37639	52242	36204	38421	16554	3655	4270	4414
PF3D7_0731700		Plasmodium exported protein (hyp9), unknown function	767	1344	755	484	513	204	99	146
PF3D7_0731800	GEXP08	alpha/beta hydrolase, putative	104	132	57	98	921	346	383	410
PF3D7_0731900	RIF	rifin, pseudogene	8	22	5	4	23	9	0	15
PF3D7_0732000		stevor	0	0	0	14	20	8	4	3
PF3D7_0732100	VAR	erythrocyte membrane protein 1 (PfEMP1), pseudogene	1	4	0	3	2	2	6	4
PF3D7_0732200	RIF	rifin	29	18	16	14	2	2	10	8
PF3D7_0732300	RIF	rifin	14	13	0	6	15	4	9	8
PF3D7_0732400	RIF	rifin	8	5	2	5	9	10	9	8
PF3D7_0732500	RIF	rifin	4	8	6	9	14	2	8	4
PF3D7_0732600		Plasmodium exported protein, unknown function, fragment	2	0	0	0	0	1	0	1
PF3D7_0732700	RIF	rifin	4	6	6	5	8	6	6	10
PF3D7_0732800		erythrocyte membrane protein 1 (PfEMP1), exon 2	6	14	0	0	3	4	1	0
PF3D7_0732900	RIF	rifin	9	12	6	2	10	9	4	8
PF3D7_0733000	VAR	erythrocyte membrane protein 1, PfEMP1	82	89	68	57	165	57	144	137
PF3D7_0800100	VAR	erythrocyte membrane protein 1, PfEMP1	884	958	904	1082	1756	369	4034	4204
PF3D7_0800200	VAR	erythrocyte membrane protein 1, PfEMP1	286	414	242	222	787	312	524	577
PF3D7_0800300	VAR	erythrocyte membrane protein 1, PfEMP1	1296	1393	1050	1146	1765	449	1208	1416
PF3D7_0800400	RIF	rifin	50	18	26	11	69	42	33	39
PF3D7_0800500	RIF	rifin	4	18	21	2	18	14	4	7
PF3D7_0800600		Plasmodium exported protein (PHISTa), unknown function	135	122	53	52	363	127	79	80
PF3D7_0800650		H/ACA snoRNA	1	4	2	1	6	1	7	5
PF3D7_0800700	SURF8.3	surface-associated interspersed protein 8.3 (SURFIN 8.3)	429	638	249	226	695	229	179	205
PF3D7_0800750		Plasmodium exported protein, unknown function, pseudogene	184	242	151	120	856	215	446	690
PF3D7_0800800		Plasmodium exported protein (hyp7), unknown function	120	91	85	103	1995	606	1522	1701
PF3D7_0800900		Plasmodium exported protein (hyp7), unknown function, pseudogene	10	20	19	3	542	192	486	398
PF3D7_0801000		Plasmodium exported protein (PHISTc)	9861	9815	8412	12221	5134	1464	2427	2263
PF3D7_0801100		28S ribosomal RNA	0	0	0	0	0	0	0	0
PF3D7_0801200		5.8S ribosomal RNA	0	0	0	0	0	0	0	0
PF3D7_0801300	WARP	von Willebrand factor A domain-related protein	42	42	19	15	158	56	85	113
PF3D7_0801400		conserved Plasmodium protein, unknown function	13	24	5	10	414	153	248	223
PF3D7_0801500	NOL10	nucleolar protein 10, putative	5786	7885	4960	4827	2356	561	756	974
PF3D7_0801600		conserved protein, unknown function	3039	4304	1902	1245	1834	596	456	545
PF3D7_0801700	SENP2	sentrin-specific protease 2, putative	20653	31306	15510	16931	6675	1848	1758	2231
PF3D7_0801800		mannose-6-phosphate isomerase, putative	21022	32022	19069	20433	8281	2481	3508	3590
PF3D7_0801900	LSD2	lysine-specific histone demethylase, putative	4873	8203	3099	3968	3363	751	593	889
PF3D7_0802000	GDH3	glutamate dehydrogenase, putative	162121	231443	142167	127612	47097	13856	16298	16948
PF3D7_0802100	AP2-LT	AP2 domain transcription factor AP2-LT	11275	14943	8015	8275	63664	17066	11015	14554
PF3D7_0802200	1-CysPxn	1-cys peroxiredoxin	110929	170740	98406	79934	16936	5251	7614	8581
PF3D7_0802300	PWP2	periodic tryptophan protein 2, putative	5710	6248	4333	6036	1583	481	794	913
PF3D7_0802400		cyclin-like protein, putative	8729	10423	6577	7020	2896	1103	1469	1483
PF3D7_0802500		inositol 5-phosphatase, putative	6461	9223	4743	4740	14570	4441	3610	3986
PF3D7_0802600	ACbeta	adenylyl cyclase beta	2820	3946	1985	2215	55635	12928	13348	16873
PF3D7_0802700		conserved Plasmodium protein, unknown function	441	496	353	301	2301	682	524	602
PF3D7_0802800	CNA	serine/threonine protein phosphatase 2B catalytic subunit A	2252	2392	1628	1784	21717	5487	15961	16170
PF3D7_0802900		conserved Plasmodium protein, unknown function	1775	2565	9213	5277	823	331	570	558
PF3D7_0803000	CYP81	peptidyl-prolyl cis-trans isomerase	8631	8711	6223	7522	5943	1609	2029	2076
PF3D7_0803100	UTP14	U3 small nucleolar RNA-associated protein 14, putative	19282	27765	12832	15337	12660	3365	2630	3067
PF3D7_0803200		filament assembling protein, putative	8686	10467	6250	5615	51312	13604	12495	15044
PF3D7_0803300	MORG1	mitogen-activated protein kinase organizer 1, putative	3939	4421	2852	3083	7522	2569	2667	3121
PF3D7_0803400	RAD54	DNA repair and recombination protein RAD54, putative	14322	22450	13118	12901	15279	4611	5124	5769
PF3D7_0803500		AAA family ATPase, putative	2245	3610	1780	1983	12287	3346	3676	4090
PF3D7_0803600		conserved Plasmodium protein, unknown function	15231	20167	11174	11392	39221	11119	9281	11398
PF3D7_0803700	g-tub	tubulin gamma chain	4611	6571	3448	3508	3133	1524	1212	1621
PF3D7_0803800		proteasome subunit beta type-4	63423	79329	47784	37799	51734	16848	22749	30368
PF3D7_0803900		C/D small nucleolar RNA	3	15	6	5	7	5	4	8
PF3D7_0804000		cactin homolog, putative	17937	26585	19958	20604	11503	3479	9852	9508
PF3D7_0804100		small nucleolar RNA snoR06	25	29	37	50	16	1	21	10
PF3D7_0804200		Plasmodium RNA of unknown function RUF3	32	36	14	33	16	8	12	15
PF3D7_0804300		zinc finger protein, putative	1396	1956	1269	1336	1000	306	301	317
PF3D7_0804400	METAP1c	methionine aminopeptidase 1c, putative	6002	7921	4513	4631	4631	1198	1093	1216
PF3D7_0804500		conserved Plasmodium membrane protein, unknown function	49288	74923	28553	40085	49608	11821	8720	11683
PF3D7_0804600		tRNA pseudouridine synthase, putative	4357	4793	3128	3828	1888	685	731	927
PF3D7_0804700		conserved Plasmodium protein, unknown function	2109	3529	1405	1564	2067	530	428	516
PF3D7_0804800	CYP24	peptidyl-prolyl cis-trans isomerase	8286	11149	7811	7530	3228	982	1579	1480
PF3D7_0804900		GTPase-activating protein, putative	8673	9488	5955	6525	20452	7012	10790	12025
PF3D7_0805000		alpha/beta hydrolase, putative	827	665	657	1050	575	323	843	557
PF3D7_0805100		conserved protein, unknown function	198	197	140	167	2666	690	1070	1144
PF3D7_0805200	GAMER	gamete release protein, putative	235	257	111	130	24147	7486	15245	16551
PF3D7_0805300		zinc finger protein, putative	681	868	423	379	27968	6807	4142	6065
PF3D7_0805400		N-acetyltransferase, GNAT family, putative	5960	6508	3628	4195	1859	876	668	556
PF3D7_0805500		conserved Plasmodium protein, unknown function	1650	2831	1179	1381	3296	960	1157	1250
PF3D7_0805600	PAP2	phosphatidic acid phosphatase 2	5846	6866	4705	5437	10005	3375	9373	9690
PF3D7_0805700	FIKK8	serine/threonine protein kinase, FIKK family	9024	9473	5927	10124	22501	5623	6220	6510
PF3D7_0805800		conserved Plasmodium protein, unknown function	26	33	36	11	125	30	28	32
PF3D7_0805900		conserved protein, unknown function	1147	1440	1040	882	428	124	226	333
PF3D7_0806000		AAA family ATPase, putative	6647	7918	3994	4949	1971	617	623	606
PF3D7_0806100		conserved Plasmodium protein, unknown function	6303	11505	5409	4971	2834	650	851	982
PF3D7_0806200	DPY19	Dpy-19-like C-mannosyltransferase	1537	1615	1025	1402	7316	2023	2877	2861
PF3D7_0806300	FLP	ferlin-like protein, putative	2945	4004	2424	2488	13241	4474	6034	6629
PF3D7_0806400	ALG13	UDP-N-acetylglucosamine transferase subunit ALG13, putative	4080	4714	2638	2167	6522	2314	1750	2188
PF3D7_0806500		DnaJ protein, putative	8678	10782	6946	7757	18562	5788	10018	10703
PF3D7_0806600		kinesin-like protein, putative	1463	1532	1082	1345	1541	464	588	678
PF3D7_0806700		conserved Plasmodium membrane protein, unknown function	19279	27345	12787	14582	9703	3115	2035	2352
PF3D7_0806800		V-type proton ATPase subunit a, putative	17208	20765	14338	17338	38015	11956	27662	28161
PF3D7_0806900		conserved protein, unknown function	844	1068	825	951	548	185	403	451
PF3D7_0807000		YEATS domain-containing protein, putative	9279	13724	6517	6996	5101	1501	1959	2030
PF3D7_0807100	PSH3	DNA helicase PSH3	11879	21040	8730	7584	6661	1849	1274	1552
PF3D7_0807200		conserved Plasmodium membrane protein, unknown function	4058	5808	3154	4018	1578	611	928	803
PF3D7_0807300	RAB18	ras-related protein Rab-18	1348	1672	1321	1970	947	383	2100	1698
PF3D7_0807400	COQ10	coenzyme Q-binding protein COQ10 homolog, mitochondrial	5884	6796	3401	2829	13240	3838	3516	4774
PF3D7_0807500		proteasome subunit alpha type-6, putative	49281	59140	37899	36153	25968	8710	18712	20149
PF3D7_0807600		conserved Plasmodium protein, unknown function	64139	85023	49346	46949	40368	12105	16919	19338
PF3D7_0807700	DegP	serine protease DegP	1896	2923	1610	1313	7902	2090	2772	3142
PF3D7_0807800	RPN10	26S proteasome regulatory subunit RPN10, putative	33198	41201	26209	23101	40503	13298	15259	16459
PF3D7_0807900	TyrRS	tyrosine--tRNA ligase	6862	9450	6850	7418	5445	1476	5224	5566
PF3D7_0808000		conserved Plasmodium protein, unknown function	724	1657	770	741	331	107	147	110
PF3D7_0808100		AP-3 complex subunit delta, putative	6650	7039	3681	4078	4384	1222	846	1024
PF3D7_0808200	PMX	plasmepsin X	290	337	182	207	42011	11797	57588	60270
PF3D7_0808300		ubiquitin regulatory protein, putative	8937	9693	6658	7237	31113	8698	12320	13751
PF3D7_0808400	SEC28	coatomer subunit epsilon, putative	6854	9750	4843	3990	10806	4032	6146	6853
PF3D7_0808450	MPODD	protein MPODD, putative	2004	2855	1423	1128	1346	641	501	620
[truncated: 3,793 more rows]

## Sheet: File_6b_RNAseq_DEgenes_24hpi
Supplementary File 6b: DEseq2 analysis of differentially expressed genes of PfMORC at 24 hours.
gene	name	description	baseMean	log2FoldChange	lfcSE	stat	pvalue	padj
PF3D7_0202300		Plasmodium exported protein (hyp11), unknown function	436.32	23.891	3.9018	6.12307	9.17877e-10	7.18042e-07
PF3D7_0937200		lysophospholipase, putative	278.468	3.84595	1.21517	3.16495	0.0015511	0.0416364
PF3D7_0802900		conserved Plasmodium protein, unknown function	2137.93	2.3164	0.238068	9.72998	2.24632e-22	1.23009e-18
PF3D7_0621400	ALV7	Pf77 protein	1352.79	1.98258	0.266847	7.42963	1.08903e-13	1.98784e-10
PF3D7_0812800		zinc finger protein, putative	94.8074	1.46001	0.410724	3.55472	0.000378386	0.0199235
PF3D7_1253400	ACS3	acyl-CoA synthetase	124.855	1.42579	0.379485	3.75717	0.000171845	0.0132539
PF3D7_1446000		U5 spliceosomal RNA	294.577	1.32163	0.317502	4.16258	3.1467e-05	0.00453457
PF3D7_0936000	REX2	ring-exported protein 2	5312.55	1.28756	0.164765	7.8145	5.51815e-15	1.51087e-11
PF3D7_1355300	SET6	histone-lysine N-methyltransferase, putative	740.509	1.18404	0.294974	4.01404	5.96881e-05	0.00594276
PF3D7_0301800		Plasmodium exported protein, unknown function	16147.7	1.11793	0.163463	6.83905	7.97228e-12	1.09141e-08
PF3D7_0507300	SOPT	subtilisin-like ookinete protein SOPT	3279.83	1.06663	0.219083	4.86862	1.12379e-06	0.000366721
PF3D7_1148900		Plasmodium exported protein, unknown function	351.397	1.04049	0.256283	4.05993	4.90877e-05	0.00528396
PF3D7_0903700		alpha tubulin 1	5871.19	1.0195	0.198112	5.14607	2.66006e-07	0.000119169
PF3D7_1206400	TUM1	thiosulfate sulfurtransferase, putative	839.882	0.9803	0.214064	4.57947	4.66149e-06	0.00116029
PF3D7_0829800		non-coding RNA	907.696	0.976784	0.284706	3.43086	0.000601678	0.0247728
PF3D7_1463500		fam-a protein	2847.25	0.938449	0.214864	4.36764	1.25597e-05	0.00221861
PF3D7_0726200	FIKK7.1	serine/threonine protein kinase, FIKK family	671.832	0.898312	0.210721	4.26304	2.01661e-05	0.00334635
PF3D7_0526200	ARFGAP2	ADP-ribosylation factor GTPase-activating protein 2	397.605	0.869473	0.266257	3.26555	0.00109254	0.0354008
PF3D7_0401800	PfD80	Plasmodium exported protein (PHISTb), unknown function	4091.31	0.853841	0.204106	4.18332	2.87284e-05	0.00436991
PF3D7_1476400	FIKK14	serine/threonine protein kinase, FIKK family, pseudogene	386.939	0.850979	0.266648	3.1914	0.00141586	0.0403555
PF3D7_1441600		acid cluster protein 33 homologue, putative	850.564	0.808841	0.202625	3.99181	6.55719e-05	0.00619089
PF3D7_0414200.2		calmodulin-like protein	726.699	0.792579	0.230139	3.44391	0.00057337	0.0239144
PF3D7_0915400	PFK9	ATP-dependent 6-phosphofructokinase	16276.1	0.780156	0.20259	3.85091	0.000117678	0.00991392
PF3D7_1015900	ENO	enolase	70162.3	0.772934	0.190219	4.06339	4.83648e-05	0.00528396
PF3D7_0702500		Plasmodium exported protein, unknown function	2059.44	0.771413	0.207198	3.72308	0.000196807	0.0145638
PF3D7_1000600	RIF	rifin	526.835	0.766676	0.203047	3.77586	0.000159458	0.012655
PF3D7_1351600	GK	glycerol kinase	2591.1	0.765414	0.167018	4.58282	4.58742e-06	0.00116029
PF3D7_1235200	VP2	V-type K+-independent H+-translocating inorganic pyrophosphatase	2398.03	0.763714	0.187459	4.07403	4.62064e-05	0.00528396
PF3D7_0525700		conserved protein, unknown function	5680.62	0.761067	0.185258	4.10814	3.98863e-05	0.00485372
PF3D7_0219900		Plasmodium exported protein, unknown function	2869.34	0.757266	0.149263	5.07338	3.90812e-07	0.000142673
PF3D7_1356400		phosphatase 2A regulatory subunit-related protein, putative	1007.44	0.743316	0.221602	3.35428	0.000795713	0.0294414
PF3D7_1437500		conserved Plasmodium membrane protein, unknown function	762.317	0.730829	0.207562	3.52102	0.000429888	0.021597
PF3D7_1011000	ISP1	inner membrane complex sub-compartment protein 1	2888.18	0.729826	0.228053	3.20024	0.00137312	0.0398433
PF3D7_0414200		calmodulin-like protein	601.899	0.724625	0.234694	3.08752	0.00201832	0.0478455
PF3D7_1332100		conserved protein, unknown function	1898.77	0.715922	0.22609	3.16653	0.00154267	0.0416364
PF3D7_0610700		conserved Plasmodium protein, unknown function	1320.82	0.712499	0.229319	3.10702	0.00188985	0.0463165
PF3D7_0103800	ARP1	actin-related protein ARP1, putative	2503.59	0.699884	0.179345	3.90246	9.52214e-05	0.00827671
PF3D7_1123500	GP2	golgi protein 2	2748.86	0.699526	0.162079	4.31596	1.58908e-05	0.00271931
PF3D7_1348100		GTPase, putative	1264.79	0.699148	0.218442	3.20061	0.00137135	0.0398433
PF3D7_0911000		phosphatidylinositol N-acetylglucosaminyltransferase, putative	3978.38	0.69908	0.173341	4.03298	5.50751e-05	0.00558502
PF3D7_1141800		EELM2 domain-containing protein, putative	1360.78	0.698183	0.212542	3.28492	0.00102012	0.0341332
PF3D7_1214900		conserved protein, unknown function	2437.64	0.679601	0.21161	3.21157	0.00132012	0.0388654
PF3D7_0413700		lysine decarboxylase-like protein, putative	6500.81	0.672972	0.1663	4.04673	5.19377e-05	0.00546944
PF3D7_1346100	SEC61A	protein transport protein SEC61 subunit alpha	7495.5	0.661493	0.17938	3.68767	0.000226317	0.0156875
PF3D7_0807300	RAB18	ras-related protein Rab-18	1531.53	0.658543	0.202243	3.25619	0.00112919	0.0363734
PF3D7_0505900	MED11	mediator of RNA polymerase II transcription subunit 11, putative	4535.53	0.657351	0.188207	3.4927	0.00047816	0.0221899
PF3D7_1033200	ETRAMP10.2	early transcribed membrane protein 10.2	4624.93	0.656912	0.203377	3.23003	0.00123778	0.0378664
PF3D7_1002100	PTP5	EMP1-trafficking protein	8892.26	0.655695	0.141969	4.61858	3.86368e-06	0.00111355
PF3D7_0106100		V-type proton ATPase subunit C, putative	1784.35	0.655412	0.199661	3.28262	0.00102848	0.0341332
PF3D7_0707300	RAMA	rhoptry-associated membrane antigen	85913.1	0.653359	0.156923	4.16357	3.13315e-05	0.00453457
PF3D7_0716200		PDCD2 domain-containing protein, putative	4127.56	0.652958	0.147035	4.44085	8.96052e-06	0.00175242
PF3D7_0925700	HDAC1	histone deacetylase 1	3900.68	0.651291	0.165199	3.94246	8.06509e-05	0.00714814
PF3D7_0501300	SBP1	skeleton-binding protein 1	15744	0.649302	0.15784	4.11367	3.89415e-05	0.00484645
PF3D7_0514600		ribose-5-phosphate isomerase, putative	1566.53	0.649177	0.193466	3.35551	0.000792177	0.0294414
PF3D7_0800100	VAR	erythrocyte membrane protein 1, PfEMP1	2334.04	0.640708	0.184851	3.46608	0.000528113	0.0237681
PF3D7_0220800	CLAG2	cytoadherence linked asexual protein 2	13926.3	0.640233	0.189083	3.38599	0.000709212	0.0273496
PF3D7_0204700	HT1	hexose transporter	6309.22	0.638485	0.183542	3.47868	0.000503886	0.022994
PF3D7_1408000	PMII	plasmepsin II	2013.36	0.635043	0.196472	3.23223	0.0012283	0.0377874
PF3D7_1447000		40S ribosomal protein S5	27552	0.631606	0.158752	3.97858	6.93273e-05	0.00643451
PF3D7_1232200	LPD1	dihydrolipoyl dehydrogenase, mitochondrial	935.121	0.625651	0.19057	3.28305	0.0010269	0.0341332
PF3D7_1218000	TRAMP	thrombospondin-related apical membrane protein	9934.16	0.622162	0.1771	3.51306	0.000442974	0.0217739
PF3D7_0320900	H2A.Z	histone H2A.Z	57451.4	0.617418	0.17162	3.59758	0.000321189	0.0179739
PF3D7_1116800	HSP101	heat shock protein 101	23566.4	0.617412	0.171809	3.5936	0.00032614	0.0179739
PF3D7_0816600	ClpB1	chaperone protein ClpB1	3009.86	0.608396	0.175867	3.4594	0.00054138	0.0237681
PF3D7_1444300	LPAAT	1-acyl-sn-glycerol-3-phosphate acyltransferase, putative	10019.9	0.597464	0.180931	3.30217	0.000959394	0.0335607
PF3D7_1114200		GTPase-activating protein, putative	5761.66	0.594197	0.157702	3.76785	0.00016466	0.0128811
PF3D7_1349100		nucleoside diphosphate hydrolase, putative	1975.42	0.592486	0.16494	3.59213	0.00032799	0.0179739
PF3D7_0302200	CLAG3.2	cytoadherence linked asexual protein 3.2	2192.06	0.590714	0.187236	3.15492	0.00160541	0.0426759
PF3D7_0831800	HRP2	histidine-rich protein II	34057	0.590689	0.143087	4.12817	3.65657e-05	0.00479775
PF3D7_0624000	HK	hexokinase	13245.5	0.588832	0.161763	3.6401	0.000272535	0.0171541
PF3D7_1116700	DPAP1	dipeptidyl aminopeptidase 1	11801.9	0.587325	0.156935	3.74248	0.000182211	0.0138581
PF3D7_0801000		Plasmodium exported protein (PHISTc)	5250.78	0.587033	0.17208	3.41139	0.000646332	0.0257215
PF3D7_1211900	ATP4	non-SERCA-type Ca2+ -transporting P-ATPase	7639.3	0.5845	0.166446	3.51165	0.00044534	0.0217739
PF3D7_1218300	AP2-MU	AP-2 complex subunit mu	5977.19	0.574353	0.136929	4.19452	2.73448e-05	0.00427829
PF3D7_1030200	CLAMP	claudin-like apicomplexan microneme protein, putative	22905.2	0.569933	0.165268	3.44854	0.000563634	0.0238577
PF3D7_1003100	C4AP3	respiratory chain complex 4 associated protein 3	2216.46	0.56949	0.167611	3.39768	0.000679603	0.0265822
PF3D7_1104800		metabolite/drug transporter, putative	2526.53	0.568717	0.18236	3.11865	0.00181681	0.0458234
PF3D7_1450100	SRP54	signal recognition particle subunit SRP54	8650.96	0.568445	0.146127	3.89006	0.000100219	0.00857496
PF3D7_0917600	PRP43	pre-mRNA-splicing factor ATP-dependent RNA helicase PRP43, putative	2357.37	0.566446	0.178361	3.17583	0.00149409	0.0413214
PF3D7_0104200		StAR-related lipid transfer protein	3577.91	0.562923	0.170567	3.30031	0.000965785	0.0335607
PF3D7_0731500	EBA175	erythrocyte binding antigen-175	46614.2	0.561149	0.160406	3.49832	0.000468206	0.0221899
PF3D7_0316000	MA	microneme associated antigen	5193.42	0.557358	0.139556	3.9938	6.50238e-05	0.00619089
PF3D7_0207500	SERA6	serine repeat antigen 6	27030.1	0.556472	0.165799	3.3563	0.000789928	0.0294414
PF3D7_1127600		CRAL/TRIO domain-containing protein, putative	14271.2	0.555077	0.172236	3.22277	0.00126956	0.0380301
PF3D7_0525100	ACS10	acyl-CoA synthetase	23128.6	0.552215	0.159977	3.45184	0.000556782	0.0238577
PF3D7_0929200		RNA-binding protein, putative	15945.4	0.545906	0.159465	3.42336	0.000618528	0.0250893
PF3D7_0313700		conserved Plasmodium protein, unknown function	2319.58	0.545696	0.16	3.4106	0.000648205	0.0257215
PF3D7_1451100	eEF2	elongation factor 2	43111.8	0.544764	0.17196	3.16798	0.00153504	0.0416364
PF3D7_1417800	MCM2	DNA replication licensing factor MCM2	9786.22	0.538323	0.147833	3.64142	0.00027114	0.0171541
PF3D7_0207600	SERA5	serine repeat antigen 5	86238.3	0.534969	0.143451	3.72928	0.000192029	0.0144048
PF3D7_0917900	BIP	heat shock protein 70	92527.4	0.531037	0.153627	3.45667	0.000546892	0.0237681
PF3D7_0818900	HSP70	heat shock protein 70	128267	0.530891	0.146097	3.63382	0.000279253	0.0171819
PF3D7_1034400	SDHA	flavoprotein subunit of succinate dehydrogenase	3253.75	0.521679	0.167726	3.1103	0.00186896	0.0463096
PF3D7_0417200	DHFR-TS	bifunctional dihydrofolate reductase-thymidylate synthase	2867.58	0.521041	0.151357	3.44245	0.000576461	0.0239144
PF3D7_0527500	HIP	Hsc70-interacting protein	25308.7	0.518624	0.153376	3.38138	0.000721224	0.0276183
PF3D7_0416800	SAR1	small GTP-binding protein sar1	18928	0.515726	0.158849	3.24665	0.00116771	0.037026
PF3D7_1360900		RNA-binding protein, putative	11502.6	0.508582	0.145277	3.50077	0.000463909	0.0221899
PF3D7_1356600		regulator of chromosome condensation, putative	2291.83	0.504399	0.1459	3.45716	0.000545909	0.0237681
PF3D7_0902800	SERA9	serine repeat antigen 9	6399.31	0.503461	0.154065	3.26785	0.00108369	0.035323
PF3D7_1249100		THUMP domain-containing protein, putative	4564.38	0.501658	0.152037	3.29957	0.000968332	0.0335607
PF3D7_0626800	PyrK	pyruvate kinase	90417.4	0.499869	0.157654	3.17068	0.00152085	0.0416364
PF3D7_1136500	CK1	casein kinase 1	56202.5	0.490613	0.153793	3.19008	0.00142232	0.0403555
PF3D7_1420700	P113	surface protein P113	26059.2	0.486896	0.147722	3.29602	0.000980647	0.0336498
PF3D7_0532100	ETRAMP5	early transcribed membrane protein 5	64470.1	0.486155	0.134508	3.61431	0.000301144	0.0177318
PF3D7_1476300		Plasmodium exported protein (PHISTb), unknown function	14607	0.486149	0.151113	3.21712	0.00129486	0.0383278
PF3D7_0812400	KARalpha	karyopherin alpha	18715.8	0.481378	0.154481	3.1161	0.0018326	0.0458234
PF3D7_0813900	RPS16	40S ribosomal protein S16, putative	22573.1	0.480817	0.154822	3.1056	0.0018989	0.0463165
PF3D7_1321500	PDEbeta	3',5'-cyclic nucleotide phosphodiesterase beta	12297	0.478522	0.134813	3.54953	0.000385914	0.0201263
PF3D7_1135400		HotDog domain-containing protein, putative	3666.94	0.476073	0.13623	3.49462	0.000474733	0.0221899
PF3D7_1248500		bax inhibitor 1, putative	51299.2	0.472182	0.153034	3.08547	0.00203228	0.0479689
PF3D7_0220600		Plasmodium exported protein (hyp9), unknown function	2089.75	0.470753	0.151012	3.11731	0.00182507	0.0458234
PF3D7_1357000		elongation factor 1-alpha	37906.7	0.464542	0.134613	3.45094	0.000558641	0.0238577
PF3D7_1444800	FBPA	fructose-bisphosphate aldolase	193759	0.463315	0.145437	3.18568	0.00144414	0.0405544
PF3D7_1443900	HSP90	heat shock protein 90, putative	4243.39	0.456886	0.142858	3.19818	0.00138298	0.0398589
PF3D7_0619400		cell division cycle protein 48 homologue, putative	18936.2	0.454689	0.140978	3.22525	0.00125862	0.0380301
PF3D7_0306800	CCT2	T-complex protein 1 subunit beta	8813.25	0.449137	0.138939	3.23261	0.00122663	0.0377874
PF3D7_0731100	PTP2	EMP1-trafficking protein	11591.2	0.445143	0.14052	3.16782	0.00153588	0.0416364
PF3D7_1476600		Plasmodium exported protein, unknown function	2532.13	0.442261	0.142362	3.10661	0.00189247	0.0463165
PF3D7_0102200	RESA	ring-infected erythrocyte surface antigen	115207	0.436551	0.137339	3.17864	0.00147969	0.0411309
PF3D7_0817700	RON5	rhoptry neck protein 5	22554.3	0.420683	0.134948	3.11738	0.00182468	0.0458234
PF3D7_0316800		40S ribosomal protein S15A, putative	36275	0.419635	0.129271	3.24616	0.00116974	0.037026
PF3D7_0108500		ELM2 domain-containing protein, putative	31635.7	0.411313	0.133029	3.09191	0.00198871	0.0473486
PF3D7_0308200	CCT7	T-complex protein 1 subunit eta	12892.7	0.408717	0.126942	3.21971	0.00128322	0.0381897
PF3D7_1102800	ETRAMP11.2	early transcribed membrane protein 11.2	308134	0.387889	0.121924	3.1814	0.00146564	0.0409483
PF3D7_0913600		conserved Plasmodium protein, unknown function	4398.37	-0.408735	0.129102	-3.16598	0.00154561	0.0416364
PF3D7_1366200		conserved protein, unknown function	4113.88	-0.411834	0.132374	-3.11114	0.00186367	0.0463096
PF3D7_1237100		conserved Plasmodium protein, unknown function	13483.1	-0.422805	0.134359	-3.14682	0.00165058	0.043068
PF3D7_0111400	GEXP19	conserved Plasmodium protein, unknown function	7804.12	-0.425376	0.1316	-3.23235	0.00122776	0.0377874
PF3D7_1359100		riboflavin kinase, putative	3341.15	-0.427325	0.135324	-3.1578	0.00158962	0.0424622
PF3D7_1229800	MyoJ	myosin J, putative	8033.46	-0.433162	0.14055	-3.08192	0.00205672	0.0483373
PF3D7_1327400		conserved Plasmodium protein, unknown function	16713.7	-0.44105	0.136867	-3.22247	0.00127091	0.0380301
PF3D7_1350400		ubiquitin-activating enzyme E1, putative	3508.81	-0.443848	0.132519	-3.34932	0.000810094	0.0297723
PF3D7_1121300	TKL2	tyrosine kinase-like protein	6754.06	-0.470155	0.149415	-3.14663	0.00165162	0.043068
PF3D7_0111300		P-loop containing nucleoside triphosphate hydrolase, putative	14258.3	-0.473992	0.130371	-3.63571	0.000277211	0.0171819
PF3D7_1429900	WRN	ADP-dependent DNA helicase RecQ	3683.34	-0.479199	0.154465	-3.10231	0.00192015	0.0463165
PF3D7_1010100		PI31 domain-containing protein, putative	3879.21	-0.47991	0.150374	-3.19144	0.00141567	0.0403555
PF3D7_0704700	PPAT	phosphopantetheine adenylyltransferase, putative	4259.7	-0.48027	0.143563	-3.34536	0.000821758	0.029801
PF3D7_1440400		zinc finger protein, putative	4537.9	-0.482007	0.134191	-3.59194	0.00032823	0.0179739
PF3D7_1426800		conserved Plasmodium protein, unknown function	5656.97	-0.485707	0.131543	-3.69239	0.000222157	0.0155966
PF3D7_1419400		conserved Plasmodium membrane protein, unknown function	5202.24	-0.48888	0.15091	-3.23954	0.00119721	0.0374625
PF3D7_1136400	SRP72	signal recognition particle subunit SRP72, putative	19605.1	-0.4936	0.144306	-3.42051	0.00062503	0.0251666
PF3D7_1440000		conserved Plasmodium protein, unknown function	7926.08	-0.496679	0.141667	-3.50597	0.000454938	0.0220464
PF3D7_0934200		conserved protein, unknown function	2104.98	-0.498594	0.153559	-3.24691	0.00116664	0.037026
PF3D7_0205800	PH1	PH domain-containing protein, putative	13342.3	-0.505108	0.162884	-3.10104	0.00192844	0.0463165
PF3D7_1464100		conserved Plasmodium protein, unknown function	2095.94	-0.507443	0.162402	-3.12461	0.00178041	0.0457724
PF3D7_1029200		WD repeat-containing protein, putative	1331.4	-0.5106	0.155394	-3.28584	0.00101679	0.0341332
PF3D7_1449600		conserved protein, unknown function	3240.87	-0.510705	0.164869	-3.09764	0.00195071	0.0466466
PF3D7_0307900		conserved Plasmodium protein, unknown function	1780.59	-0.513019	0.148246	-3.46059	0.000538997	0.0237681
PF3D7_1017800		conserved Plasmodium protein, unknown function	5688.81	-0.515204	0.143969	-3.57858	0.000345472	0.0187307
PF3D7_0511600	ARNP	apical rhoptry neck protein	6890.16	-0.519218	0.164866	-3.14933	0.00163646	0.043068
PF3D7_1409200.2		conserved Plasmodium protein, unknown function	1363.21	-0.528014	0.1685	-3.13361	0.0017267	0.0446009
PF3D7_1419300	GST	glutathione S-transferase	6063.68	-0.529746	0.145288	-3.64618	0.000266163	0.0171472
PF3D7_0415100		conserved protein, unknown function	4227.32	-0.532238	0.151452	-3.51422	0.000441041	0.0217739
PF3D7_1247200		conserved protein, unknown function	2155.45	-0.532638	0.162007	-3.28774	0.00100995	0.0341332
PF3D7_1032700		conserved Plasmodium protein, unknown function	8552.65	-0.539533	0.150163	-3.59298	0.000326923	0.0179739
PF3D7_1110800		conserved Plasmodium protein, unknown function	911.761	-0.552182	0.177938	-3.10322	0.00191425	0.0463165
PF3D7_0933100		conserved Plasmodium protein, unknown function	770.237	-0.554712	0.178772	-3.10291	0.00191629	0.0463165
PF3D7_0925800	UPF2	regulator of nonsense transcripts 2, putative	7944.57	-0.556644	0.130809	-4.25539	2.08685e-05	0.00336105
PF3D7_0505300		UDP-N-acetylglucosamine transporter, putative	1493.33	-0.560128	0.155923	-3.59233	0.000327741	0.0179739
PF3D7_0408200		conserved Plasmodium protein, unknown function	1346.91	-0.561538	0.154783	-3.6279	0.000285732	0.0173852
PF3D7_0726300	PMS1	DNA mismatch repair protein PMS1, putative	5146.5	-0.562632	0.151394	-3.71635	0.000202123	0.0147577
PF3D7_0814100		conserved Plasmodium protein, unknown function	3150.16	-0.568605	0.180982	-3.14177	0.0016793	0.0435821
PF3D7_1231700		conserved protein, unknown function	821.297	-0.570575	0.176769	-3.2278	0.00124746	0.0379506
PF3D7_0105100		conserved Apicomplexan protein, unknown function	2224.12	-0.573852	0.166468	-3.44722	0.00056638	0.0238577
PF3D7_1139800		conserved Plasmodium protein, unknown function	5418.36	-0.574215	0.150149	-3.8243	0.000131146	0.0108812
PF3D7_0216100		conserved Plasmodium protein, unknown function	3787.05	-0.57459	0.160895	-3.57122	0.000355322	0.0190759
PF3D7_0815000	Sel3	selenoprotein	8792.9	-0.580676	0.167947	-3.45748	0.000545243	0.0237681
PF3D7_1409500		conserved Plasmodium protein, unknown function	2687.79	-0.586821	0.178078	-3.29529	0.000983193	0.0336498
PF3D7_1209800	ATP11	ATP synthase mitochondrial F1 complex assembly factor 1, putative	1973.33	-0.590992	0.163347	-3.61802	0.000296865	0.0177178
PF3D7_0423300		conserved Plasmodium protein, unknown function	22335.6	-0.602907	0.146212	-4.12352	3.73128e-05	0.00479775
PF3D7_0217200		conserved Plasmodium protein, unknown function	2057.31	-0.603075	0.180185	-3.34697	0.00081699	0.029801
PF3D7_0603000		SDE2 domain-containing protein, putative	9098.53	-0.604445	0.1889	-3.19981	0.00137516	0.0398433
PF3D7_0622500		RNA methyltransferase, putative	2584.47	-0.604489	0.171546	-3.52377	0.000425447	0.021597
PF3D7_1222800		conserved Plasmodium protein, unknown function	636.158	-0.618983	0.198564	-3.1173	0.00182514	0.0458234
PF3D7_0609400	CLS	mitochondrial cardiolipin synthase, putative	4776.71	-0.620023	0.168908	-3.67077	0.000241818	0.0163481
PF3D7_0622100		conserved Plasmodium protein, unknown function	860.28	-0.621856	0.170508	-3.64708	0.000265242	0.0171472
PF3D7_0526000		RAP protein, putative	3499.61	-0.625126	0.153605	-4.0697	4.70737e-05	0.00528396
PF3D7_0409900	ALP5b	actin-like protein, putative	3652.61	-0.636912	0.167944	-3.79242	0.000149188	0.0120141
PF3D7_1436700		conserved protein, unknown function	2736.61	-0.640507	0.140704	-4.55215	5.31002e-06	0.00126425
PF3D7_1011300	ARV1	protein ARV1, putative	1832.01	-0.642013	0.15522	-4.13615	3.53189e-05	0.00479775
PF3D7_0321300		conserved Plasmodium protein, unknown function	2603.26	-0.64225	0.173231	-3.70749	0.000209325	0.0148865
PF3D7_1221900		conserved Plasmodium membrane protein, unknown function	2500.39	-0.648063	0.17746	-3.65187	0.000260333	0.0171472
PF3D7_1320100	ClpS	ATP-dependent Clp protease adapter protein ClpS	4032.89	-0.648288	0.157302	-4.1213	3.76741e-05	0.00479775
PF3D7_0530400		conserved Plasmodium protein, unknown function	1493.89	-0.653668	0.149577	-4.3701	1.2419e-05	0.00221861
PF3D7_1038100		GDP dissociation inhibitor, putative	8632.6	-0.659083	0.197603	-3.3354	0.000851771	0.0306862
PF3D7_1355600	PIP1	PhIL1 interacting protein PIP1	1009.02	-0.661427	0.19655	-3.36518	0.000764936	0.0288882
PF3D7_0531100		conserved Plasmodium protein, unknown function	5412.97	-0.663186	0.202286	-3.27846	0.00104376	0.0342252
PF3D7_1238900	PK2	protein kinase 2	22817.9	-0.664005	0.200822	-3.30643	0.000944914	0.0333888
PF3D7_1245200		conserved Plasmodium membrane protein, unknown function	1815.52	-0.667094	0.161225	-4.13766	3.50871e-05	0.00479775
PF3D7_1371500		probable protein, unknown function	4180.66	-0.696615	0.189371	-3.67857	0.000234546	0.0160546
PF3D7_0934900		conserved Plasmodium protein, unknown function	706.58	-0.700478	0.200449	-3.49454	0.000474878	0.0221899
PF3D7_0404000		conserved Plasmodium protein, unknown function	8338.26	-0.710274	0.209448	-3.39117	0.000695953	0.0270286
PF3D7_1037400		conserved Plasmodium protein, unknown function	5710.53	-0.711572	0.157476	-4.51862	6.22449e-06	0.00142022
PF3D7_1230300	SPM2	subpellicular microtubule protein 2, putative	538.138	-0.739911	0.209491	-3.53195	0.000412511	0.0213105
PF3D7_1350800		conserved Plasmodium protein, unknown function	496.337	-0.751567	0.220998	-3.40079	0.000671913	0.0264705
PF3D7_0309100	OMD	OMD protein, putative	982.995	-0.766615	0.210018	-3.65023	0.000262004	0.0171472
PF3D7_0934600		conserved Plasmodium protein, unknown function	3971.29	-0.770277	0.189754	-4.05934	4.92115e-05	0.00528396
PF3D7_0205000		conserved Plasmodium protein, unknown function	3349.88	-0.78254	0.148963	-5.25325	1.49439e-07	8.18329e-05
PF3D7_0528900		conserved protein, unknown function	845.55	-0.788673	0.230109	-3.42739	0.000609418	0.0249043
PF3D7_1037800		dynein intermediate chain, putative	345.778	-0.804492	0.252306	-3.18855	0.00142987	0.0403607
PF3D7_0504300		conserved Plasmodium protein, unknown function	670.34	-0.837176	0.22555	-3.71171	0.000205866	0.0148332
PF3D7_1331000		protein kinase, putative	2485.43	-0.854392	0.166403	-5.13449	2.82908e-07	0.000119169
PF3D7_0318800		triosephosphate isomerase, putative	998.836	-0.855571	0.260813	-3.2804	0.00103659	0.0341948
PF3D7_0620600		conserved Plasmodium protein, unknown function	307.754	-0.85974	0.237673	-3.61732	0.000297669	0.0177178
PF3D7_0402300	RH1	reticulocyte binding protein homologue 1	25623.5	-0.880247	0.196307	-4.48403	7.32462e-06	0.00148554
PF3D7_1370800		non-coding RNA	362.837	-0.892264	0.247529	-3.60468	0.000312536	0.0179739
PF3D7_1038600		Plasmodium exported protein, unknown function	214.894	-0.914148	0.290342	-3.14852	0.001641	0.043068
PF3D7_0620400	MSP10	merozoite surface protein 10	1110.04	-0.93881	0.208896	-4.49415	6.98488e-06	0.00148554
PF3D7_0405300	LISP2	liver specific protein 2, putative	2269.27	-0.945646	0.239913	-3.94162	8.09322e-05	0.00714814
PF3D7_0315700		conserved Plasmodium membrane protein, unknown function	450.567	-0.948159	0.215206	-4.40582	1.05384e-05	0.00198994
PF3D7_1347800	CEP72	centrosomal protein CEP72, putative	705.542	-0.948475	0.183422	-5.171	2.32841e-07	0.000115913
PF3D7_0319800		conserved Plasmodium protein, unknown function	762.775	-0.953603	0.23438	-4.06862	4.72931e-05	0.00528396
PF3D7_0927500		dynein light chain, putative	961.881	-0.955551	0.213021	-4.48572	7.26693e-06	0.00148554
PF3D7_1321000		conserved Plasmodium protein, unknown function	2980.7	-1.05984	0.217802	-4.86606	1.13847e-06	0.000366721
PF3D7_0909200	POFUT2	GDP-fucose protein O-fucosyltransferase 2	249.699	-1.06522	0.302361	-3.52302	0.000426661	0.021597
PF3D7_0606300		conserved Plasmodium protein, unknown function	592.553	-1.09787	0.274771	-3.99557	6.45388e-05	0.00619089
PF3D7_1005200		conserved Plasmodium protein, unknown function	178.024	-1.15957	0.325557	-3.5618	0.000368318	0.0195816
PF3D7_1226200		conserved Plasmodium protein, unknown function	243.912	-1.17707	0.308904	-3.81047	0.000138701	0.0113363
PF3D7_1144200		conserved Plasmodium protein, unknown function	1676.64	-1.20135	0.205716	-5.83987	5.22408e-09	3.17856e-06
PF3D7_1441000	NCS2	cytoplasmic tRNA 2-thiolation protein 2, putative	4178.82	-1.20323	0.202965	-5.92827	3.0614e-09	2.09553e-06
PF3D7_1446100		conserved Plasmodium protein, unknown function	201.99	-1.23608	0.354621	-3.48563	0.000490976	0.0225931
PF3D7_0312900		hypothetical protein	199.804	-1.25943	0.263766	-4.77481	1.79878e-06	0.000547228
PF3D7_1235500	MT-A70.2	N6-adenosine-methyltransferase, putative	10385.7	-1.36147	0.22219	-6.1275	8.92712e-10	7.18042e-07
PF3D7_1244500	PIMMS57	PIMMS57 protein	405.555	-1.38722	0.302411	-4.58719	4.49261e-06	0.00116029
PF3D7_1020100		flagellar outer arm dynein-associated protein, putative	957.389	-1.5184	0.468415	-3.24157	0.00118874	0.0374112
PF3D7_0219000		small nucleolar RNA snoR01	245.981	-1.60418	0.404927	-3.96165	7.4433e-05	0.00679325
PF3D7_1148500		non-coding RNA	208.888	-1.67236	0.327677	-5.10369	3.33099e-07	0.000130289
PF3D7_1034300	TLAP2	thioredoxin-like associated protein 2, putative	143.814	-1.68427	0.506374	-3.32614	0.000880588	0.031517
PF3D7_0217500	CDPK1	calcium-dependent protein kinase 1	47980.7	-1.7298	0.42802	-4.04139	5.31363e-05	0.00549009
PF3D7_1232400		CWC16 domain-containing protein, putative	41644.8	-2.46656	0.386901	-6.37517	1.82765e-10	2.00164e-07
PF3D7_1014200	HAP2	male gamete fusion factor HAP2, putative	48.4699	-2.77244	0.822864	-3.36925	0.000753731	0.0286627
PF3D7_0108900		non-coding RNA	2414.81	-2.94241	0.943656	-3.11809	0.00182025	0.0458234
PF3D7_0700900	EPF1	exported protein family 1, pseudogene	7.55832	-6.22971	1.88415	-3.30639	0.00094508	0.0333888

## Sheet: File_6c_RNAseq_DEgenes_36hpi
Supplementary File 6c: DEseq2 analysis of differentially expressed genes of PfMORC at 36 hours.
gene	name	description	baseMean	log2FoldChange	lfcSE	stat	pvalue	padj
PF3D7_1216800		tRNA Proline	10.6601	3.76719	1.38831	2.71351	0.00665743	0.0133049
PF3D7_0903700		alpha tubulin 1	5871.19	2.81842	0.199425	14.1328	2.38586e-45	1.60031e-42
PF3D7_0812800		zinc finger protein, putative	94.8074	2.81814	0.439247	6.41584	1.40047e-10	1.04388e-09
PF3D7_1011000	ISP1	inner membrane complex sub-compartment protein 1	2888.18	2.75517	0.22949	12.0056	3.31946e-33	3.95827e-31
PF3D7_0800100	VAR	erythrocyte membrane protein 1, PfEMP1	2334.04	2.63104	0.18352	14.3365	1.29375e-46	1.15705e-43
PF3D7_1409400		conserved protein, unknown function	15811.7	2.61049	0.145194	17.9793	2.82916e-72	1.51813e-68
PF3D7_1446000		U5 spliceosomal RNA	294.577	2.43998	0.317755	7.67881	1.60577e-14	2.1016e-13
PF3D7_0520900	SAHH	adenosylhomocysteinase	34863.8	2.43612	0.180963	13.462	2.61697e-41	9.36177e-39
PF3D7_1476900		Plasmodium exported protein, unknown function, pseudogene	14.7269	2.36714	0.938119	2.52328	0.0116266	0.0218984
PF3D7_1100500	RIF	rifin	39.319	2.36224	0.761869	3.10059	0.00193133	0.00430022
PF3D7_1342600	MyoA	myosin A	81104.7	2.3539	0.152237	15.4621	6.24983e-54	1.61577e-50
PF3D7_0828000	ROM3	rhomboid protease ROM3	150.177	2.33067	0.363461	6.41245	1.43197e-10	1.06279e-09
PF3D7_1100100	VAR	erythrocyte membrane protein 1, PfEMP1	1300.41	2.32037	0.204503	11.3464	7.73e-30	5.761e-28
PF3D7_1213100		U1 spliceosomal RNA	59.9017	2.31886	0.585978	3.95725	7.58163e-05	0.000225266
PF3D7_0108400.2		mitochondrial carrier protein, putative	272.097	2.29755	0.274736	8.36276	6.12667e-17	1.14926e-15
PF3D7_0826800		small nucleolar RNA snoR05	99.7186	2.27914	0.466247	4.88827	1.01724e-06	4.20857e-06
PF3D7_1127600		CRAL/TRIO domain-containing protein, putative	14271.2	2.26411	0.171657	13.1898	1.00494e-39	2.34458e-37
PF3D7_1444600		conserved Plasmodium protein, unknown function	308.755	2.25263	0.296694	7.59245	3.13918e-14	3.94493e-13
PF3D7_0610700		conserved Plasmodium protein, unknown function	1320.82	2.25248	0.236769	9.51343	1.84481e-21	5.82309e-20
PF3D7_MIT02100		erythrocyte membrane protein 1 (PfEMP1), pseudogene	9987.22	2.24407	0.175446	12.7907	1.84893e-37	3.30712e-35
PF3D7_0307000		small nucleolar RNA snoR03	34.3145	2.2436	0.741593	3.02537	0.00248325	0.00541452
PF3D7_0620700		DnaJ protein, putative	4354.69	2.23754	0.174169	12.8469	8.95075e-38	1.6562e-35
PF3D7_1473200		DnaJ protein, putative	9170.3	2.20322	0.193485	11.387	4.85242e-30	3.94517e-28
PF3D7_1215200	CYP32	peptidyl-prolyl cis-trans isomerase	791.148	2.19718	0.269252	8.16029	3.34216e-16	5.65742e-15
PF3D7_1214900		conserved protein, unknown function	2437.64	2.19126	0.212744	10.3	7.04741e-25	3.28838e-23
PF3D7_0817900	HMGB2	high mobility group protein B2	27066.9	2.17646	0.142173	15.3085	6.70421e-53	8.9937e-50
PF3D7_0425900	RIF	rifin	32.6159	2.1534	0.688082	3.12957	0.00175064	0.00393052
PF3D7_1033300		conserved protein, unknown function	1838.56	2.15046	0.231029	9.30819	1.30033e-20	3.67239e-19
PF3D7_0416800	SAR1	small GTP-binding protein sar1	18928	2.14957	0.15933	13.4913	1.75876e-41	6.74108e-39
PF3D7_0515700	GAP40	glideosome-associated protein 40, putative	89952	2.1475	0.139101	15.4384	9.03338e-54	1.61577e-50
PF3D7_1346100	SEC61A	protein transport protein SEC61 subunit alpha	7495.5	2.14444	0.180404	11.8868	1.38575e-32	1.45803e-30
PF3D7_0204700	HT1	hexose transporter	6309.22	2.12558	0.18452	11.5195	1.0523e-30	9.2568e-29
PF3D7_0413600	RPT3	26S protease regulatory subunit 6B, putative	18271.9	2.09284	0.166145	12.5965	2.20861e-36	3.4857e-34
PF3D7_0400500	RIF	rifin	19.1035	2.09068	0.898278	2.32743	0.0199424	0.035481
PF3D7_1015900	ENO	enolase	70162.3	2.08402	0.19057	10.9358	7.77501e-28	4.74099e-26
PF3D7_1444800	FBPA	fructose-bisphosphate aldolase	193759	2.06699	0.145453	14.2107	7.85916e-46	6.02461e-43
PF3D7_1323700	GAPM1	glideosome associated protein with multiple membrane spans 1	28524.6	2.06149	0.163502	12.6084	1.89916e-36	3.08816e-34
PF3D7_0105000		non-coding RNA	1892.77	2.0517	0.180214	11.3848	4.9795e-30	3.98806e-28
PF3D7_0105500		conserved protein, unknown function	203.311	2.0335	0.339708	5.98601	2.15052e-09	1.33057e-08
PF3D7_0826400	CPT	cis-prenyltransferase	5918.82	2.01439	0.15881	12.6843	7.23009e-37	1.2124e-34
PF3D7_1128200	MBF1	multiprotein-bridging factor 1, putative	2142.55	2.00513	0.165697	12.1012	1.04087e-33	1.39633e-31
PF3D7_0622600	QCR9	cytochrome b-c1 complex subunit 9, putative	4085.52	2.00143	0.195689	10.2276	1.49209e-24	6.56273e-23
PF3D7_MIT01400		erythrocyte membrane protein 1 (PfEMP1), pseudogene	3988.43	2.00011	0.152978	13.0745	4.60357e-39	1.02928e-36
PF3D7_0320900	H2A.Z	histone H2A.Z	57451.4	1.99105	0.171547	11.6065	3.82077e-31	3.59689e-29
PF3D7_1248500		bax inhibitor 1, putative	51299.2	1.99083	0.153083	13.0049	1.14732e-38	2.46261e-36
PF3D7_0623500	SOD2	superoxide dismutase [Fe]	2877.49	1.98946	0.200326	9.93115	3.04723e-23	1.15967e-21
PF3D7_1467700		conserved Plasmodium protein, unknown function	291.129	1.98741	0.341657	5.81697	5.99243e-09	3.46502e-08
PF3D7_0600300	RIF	rifin	47.6886	1.98437	0.561659	3.53306	0.000410784	0.00105771
PF3D7_0504600	BCKDHB	2-oxoisovalerate dehydrogenase subunit beta, mitochondrial, putative	2992.84	1.98131	0.147542	13.4288	4.10124e-41	1.37545e-38
PF3D7_0807300	RAB18	ras-related protein Rab-18	1531.53	1.97567	0.205153	9.63022	5.96015e-22	2.02419e-20
PF3D7_0818200	14-3-3I	14-3-3 protein	56976	1.97402	0.172709	11.4298	2.96826e-30	2.45041e-28
PF3D7_0505900	MED11	mediator of RNA polymerase II transcription subunit 11, putative	4535.53	1.97265	0.191067	10.3244	5.46435e-25	2.59484e-23
PF3D7_0624000	HK	hexokinase	13245.5	1.97034	0.162422	12.131	7.23537e-34	9.95512e-32
PF3D7_1357000		elongation factor 1-alpha	37906.7	1.95394	0.13518	14.4544	2.3528e-47	2.52503e-44
PF3D7_0424600		Plasmodium exported protein (PHISTb)	21394	1.92736	0.185782	10.3743	3.24582e-25	1.59789e-23
PF3D7_1204500		conserved protein, unknown function	2317.87	1.9253	0.16954	11.356	6.9238e-30	5.30758e-28
PF3D7_1447000		40S ribosomal protein S5	27552	1.92352	0.159433	12.0648	1.62042e-33	2.07029e-31
PF3D7_0627500	DJ1	protein DJ-1	8029.05	1.91901	0.185038	10.3709	3.36304e-25	1.64055e-23
PF3D7_0525100	ACS10	acyl-CoA synthetase	23128.6	1.91704	0.160081	11.9754	4.7811e-33	5.34487e-31
PF3D7_0831800	HRP2	histidine-rich protein II	34057	1.89686	0.141913	13.3664	9.50762e-41	2.93312e-38
PF3D7_1370500		non-coding RNA	559.831	1.89641	0.307508	6.16701	6.95917e-10	4.72098e-09
PF3D7_1468700	eIF4A	eukaryotic initiation factor 4A	66183.2	1.89404	0.13971	13.557	7.2069e-42	3.7781e-39
PF3D7_1444300	LPAAT	1-acyl-sn-glycerol-3-phosphate acyltransferase, putative	10019.9	1.89236	0.18088	10.4619	1.29179e-25	6.60167e-24
PF3D7_1030700		RNA methyltransferase, putative	692.801	1.88676	0.223124	8.45612	2.76419e-17	5.37415e-16
PF3D7_0626800	PyrK	pyruvate kinase	90417.4	1.87386	0.157879	11.869	1.71518e-32	1.76994e-30
PF3D7_0508600		conserved protein, unknown function	4687.7	1.87222	0.140971	13.2808	2.99053e-40	8.0236e-38
PF3D7_0104900		RNase MRP	2888.39	1.8592	0.173525	10.7143	8.71816e-27	4.82285e-25
PF3D7_0316700	YOP1	protein YOP1, putative	4180.86	1.84146	0.153509	11.9958	3.73881e-33	4.36141e-31
PF3D7_1000600	RIF	rifin	526.835	1.84031	0.234749	7.83948	4.52422e-15	6.49116e-14
PF3D7_1147900	PEX22	peroxisome assembly protein 22, putative	3471.15	1.83123	0.150239	12.1887	3.57023e-34	5.04154e-32
PF3D7_1029600	ADA	adenosine deaminase	35055.2	1.82769	0.147263	12.4111	2.27631e-35	3.39296e-33
PF3D7_1463500		fam-a protein	2847.25	1.82751	0.215401	8.48425	2.17111e-17	4.29316e-16
PF3D7_1008700		tubulin beta chain	11345.6	1.82711	0.185669	9.84069	7.51964e-23	2.69003e-21
PF3D7_1462800	GAPDH	glyceraldehyde-3-phosphate dehydrogenase	270647	1.82529	0.148657	12.2785	1.18108e-34	1.71289e-32
PF3D7_1451800	SORTLR	sortilin	7122.69	1.82487	0.190183	9.5953	8.36741e-22	2.77157e-20
PF3D7_1140100		V-type proton ATPase subunit F, putative	6053.95	1.8155	0.154344	11.7627	6.07661e-32	5.92856e-30
PF3D7_0103800	ARP1	actin-related protein ARP1, putative	2503.59	1.81384	0.176795	10.2595	1.07212e-24	4.8754e-23
PF3D7_1132800	AQP	aquaglyceroporin	14602	1.80228	0.13148	13.7076	9.14454e-43	5.45218e-40
PF3D7_1120200		conserved Plasmodium protein, unknown function	5276.81	1.80132	0.158684	11.3516	7.28119e-30	5.50294e-28
PF3D7_1324900	LDH	L-lactate dehydrogenase	59990	1.79908	0.136097	13.2191	6.80365e-40	1.65947e-37
PF3D7_1244300		ACEA small nucleolar RNA U3	73.4393	1.79578	0.440671	4.0751	4.59947e-05	0.000142746
PF3D7_1137000		U2 spliceosomal RNA	60.8147	1.79268	0.521917	3.4348	0.000592982	0.0014786
PF3D7_0715800	DMT1	drug/metabolite transporter DMT1, putative	4529.8	1.79258	0.160679	11.1563	6.67003e-29	4.70939e-27
PF3D7_1416500	GDH1	NADP-specific glutamate dehydrogenase	6064.65	1.79204	0.149125	12.017	2.89198e-33	3.5269e-31
PF3D7_0414200.2		calmodulin-like protein	726.699	1.79135	0.233762	7.66316	1.81407e-14	2.3627e-13
PF3D7_1439400		cytochrome b-c1 complex subunit Rieske, putative	5449.98	1.78913	0.172153	10.3927	2.67807e-25	1.34304e-23
PF3D7_0513300	PNP	purine nucleoside phosphorylase	40914.3	1.78711	0.148397	12.0427	2.11791e-33	2.64295e-31
PF3D7_1309500	GAR1	H/ACA ribonucleoprotein complex subunit 1, putative	2303.67	1.78662	0.179676	9.94359	2.68947e-23	1.03084e-21
PF3D7_0826700	RACK1	receptor for activated c kinase	32076	1.77655	0.139802	12.7076	5.36491e-37	9.28648e-35
PF3D7_1462700	CYT1	cytochrome c1, heme protein, mitochondrial, putative	6459.59	1.77632	0.172486	10.2984	7.16689e-25	3.3153e-23
PF3D7_1132700	mRPL2	50S ribosomal protein L2, putative	778.475	1.77126	0.207365	8.54176	1.32195e-17	2.70747e-16
PF3D7_0108400		mitochondrial carrier protein, putative	1898.96	1.7563	0.158527	11.0789	1.58781e-28	1.03905e-26
PF3D7_0320800	DOZI	ATP-dependent RNA helicase DDX6	25803.1	1.75463	0.145238	12.0811	1.33001e-33	1.7407e-31
PF3D7_0610300		non-coding RNA	33.5434	1.75138	0.680423	2.57396	0.0100543	0.0192546
PF3D7_1027900	DHHC10	palmitoyltransferase DHHC10, putative	555.828	1.74955	0.232563	7.52291	5.35721e-14	6.48912e-13
PF3D7_0413700		lysine decarboxylase-like protein, putative	6500.81	1.74947	0.16801	10.4129	2.16554e-25	1.09625e-23
PF3D7_0817700	RON5	rhoptry neck protein 5	22554.3	1.74784	0.130804	13.3623	1.00451e-40	2.93312e-38
PF3D7_1004000		60S ribosomal protein L13, putative	27290.3	1.74681	0.149764	11.6637	1.95357e-31	1.87194e-29
PF3D7_0915400	PFK9	ATP-dependent 6-phosphofructokinase	16276.1	1.74245	0.203297	8.57099	1.026e-17	2.12569e-16
PF3D7_0923800.2		thioredoxin reductase	9879.8	1.73819	0.12874	13.5015	1.53241e-41	6.32532e-39
PF3D7_1223900		50S ribosomal protein L24, putative	1578.2	1.73592	0.18677	9.29447	1.47944e-20	4.13472e-19
PF3D7_0106800	RAB5c	ras-related protein Rab-5C	2806.09	1.73512	0.200888	8.63725	5.75845e-18	1.24596e-16
PF3D7_0309500	AS	asparagine synthetase [glutamine-hydrolyzing], putative	20753.7	1.72691	0.164199	10.5171	7.20255e-26	3.78911e-24
PF3D7_1468500	DER1-1	derlin-1	5012.35	1.72035	0.178715	9.62618	6.19912e-22	2.09211e-20
PF3D7_1107400	RAD51	DNA repair protein RAD51	1939.06	1.71878	0.154119	11.1523	6.98054e-29	4.86462e-27
PF3D7_0808200	PMX	plasmepsin X	32511.6	1.71782	0.12957	13.2579	4.06184e-40	1.0379e-37
PF3D7_0703300		conserved Plasmodium protein, unknown function	1889.76	1.71606	0.15292	11.222	3.18141e-29	2.27619e-27
PF3D7_0608700	CCT6	T-complex protein 1 subunit zeta	14535.2	1.71431	0.199637	8.58713	8.91675e-18	1.86176e-16
PF3D7_1472900		dihydroorotase, putative	516.891	1.71069	0.245442	6.96984	3.17304e-12	3.01889e-11
PF3D7_0922200	SAMS	S-adenosylmethionine synthetase	53491	1.70107	0.141889	11.9888	4.06869e-33	4.64523e-31
PF3D7_1020900	ARF1	ADP-ribosylation factor 1	29455.3	1.70056	0.148566	11.4465	2.44967e-30	2.05389e-28
PF3D7_0527500	HIP	Hsc70-interacting protein	25308.7	1.69966	0.154223	11.0208	3.03504e-28	1.916e-26
PF3D7_0219100		saccharopine dehydrogenase, putative	611.38	1.69641	0.224121	7.56914	3.75697e-14	4.66664e-13
PF3D7_0519200		V-type proton ATPase 16 kDa proteolipid subunit	16887	1.69559	0.171365	9.89461	4.39321e-23	1.61466e-21
PF3D7_0215900	DHHC11	palmitoyltransferase DHHC11, putative	476.981	1.69025	0.274321	6.16156	7.20308e-10	4.86797e-09
PF3D7_1148200		non-coding RNA	650.55	1.68633	0.27721	6.08323	1.17785e-09	7.68898e-09
PF3D7_1367600		ribosome biogenesis protein MRT4, putative	2133.85	1.68223	0.169593	9.9192	3.43511e-23	1.29808e-21
PF3D7_1446600	CEN2	centrin-2	16379.8	1.68025	0.129609	12.964	1.95803e-38	3.89141e-36
PF3D7_0710300		conserved protein, unknown function	1151.35	1.6784	0.230048	7.29586	2.96751e-13	3.19111e-12
PF3D7_0422300		alpha tubulin 2	1361.52	1.676	0.18114	9.25249	2.19322e-20	6.03529e-19
PF3D7_1402200	ApiCOX19	cytochrome c oxidase subunit ApiCOX19, putative	17842.9	1.6754	0.141735	11.8206	3.05342e-32	3.0342e-30
PF3D7_0727400		proteasome subunit alpha type-5, putative	17647	1.66713	0.132753	12.5582	3.58574e-36	5.49746e-34
PF3D7_0818500		zinc finger protein, putative	45003.7	1.66418	0.124566	13.3598	1.03856e-40	2.93312e-38
PF3D7_0219400		ribosome associated membrane protein RAMP4, putative	12050.8	1.66226	0.155289	10.7043	9.71277e-27	5.31824e-25
PF3D7_0827900	PDI8	protein disulfide-isomerase	123662	1.66143	0.129104	12.8689	6.73285e-38	1.2903e-35
PF3D7_0923800	TRXR	thioredoxin reductase	10685.7	1.66089	0.12256	13.5517	7.7449e-42	3.7781e-39
PF3D7_1041200	RIF	rifin	31.2287	1.65527	0.698722	2.369	0.0178362	0.0320418
PF3D7_0516900	RPL2	60S ribosomal protein L2	27868.7	1.64168	0.149112	11.0097	3.43003e-28	2.14018e-26
PF3D7_0506900	ROM4	rhomboid protease ROM4	20106.1	1.63952	0.150385	10.9022	1.12539e-27	6.63611e-26
PF3D7_0400300	RIF	rifin	1051.23	1.639	0.174264	9.40525	5.1908e-21	1.56482e-19
PF3D7_1217800	DPH3	diphthamide biosynthesis protein 3, putative	120.257	1.63777	0.372643	4.39501	1.10768e-05	3.84962e-05
PF3D7_1037500	DYN2	dynamin-like protein	10157.7	1.63398	0.165969	9.84514	7.19361e-23	2.59066e-21
PF3D7_0914400	KIC3	protein KIC3	9014.12	1.63381	0.151682	10.7713	4.70105e-27	2.62769e-25
PF3D7_0829100	CCDC124	coiled-coil domain-containing protein 124, putative	4277.77	1.62869	0.16324	9.97731	1.91593e-23	7.5043e-22
PF3D7_0109000	PHIL1	photosensitized INA-labeled protein PHIL1	12671.8	1.62153	0.137131	11.8247	2.91097e-32	2.94722e-30
PF3D7_1006200	ALBA3	DNA/RNA-binding protein Alba 3	46689.1	1.62063	0.171094	9.47212	2.7421e-21	8.55471e-20
PF3D7_1114200		GTPase-activating protein, putative	5761.66	1.62008	0.156897	10.3257	5.39082e-25	2.58278e-23
PF3D7_1364100	P92	6-cysteine protein P92	12039.3	1.61656	0.167753	9.63653	5.60486e-22	1.91565e-20
PF3D7_0414200		calmodulin-like protein	601.899	1.61585	0.238254	6.78205	1.18482e-11	1.04225e-10
PF3D7_1242800	rabGDI	rab specific GDP dissociation inhibitor	16373.7	1.61187	0.173521	9.28917	1.55494e-20	4.32323e-19
PF3D7_1027800	RPL3	60S ribosomal protein L3	54877.4	1.60766	0.123685	12.998	1.25538e-38	2.5909e-36
PF3D7_1360900		RNA-binding protein, putative	11502.6	1.60027	0.14626	10.9413	7.31572e-28	4.5122e-26
PF3D7_1137500		ribosomal protein S14, apicoplast, putative	6271.77	1.59527	0.148033	10.7764	4.44828e-27	2.51258e-25
PF3D7_0721700	PSOP1	secreted ookinete protein, putative	65.1004	1.5943	0.489932	3.25412	0.00113743	0.00266409
PF3D7_0617900	H3.3	histone H3 variant	28299.9	1.59414	0.154867	10.2936	7.53226e-25	3.45454e-23
PF3D7_1418000	UFD1	ubiquitin fusion degradation protein 1, putative	3940.81	1.59359	0.155384	10.2558	1.11433e-24	5.02478e-23
PF3D7_1120400		alpha/beta hydrolase fold domain containing protein, putative	1310.69	1.59211	0.187403	8.49566	1.96819e-17	3.92613e-16
PF3D7_1437500		conserved Plasmodium membrane protein, unknown function	762.317	1.59069	0.211593	7.51771	5.57423e-14	6.72165e-13
PF3D7_0816400		EF-hand calcium-binding domain-containing protein, putative	3528.77	1.58387	0.183756	8.61943	6.7287e-18	1.43279e-16
PF3D7_0215700	RPB2	DNA-directed RNA polymerase II subunit RPB2, putative	7468.81	1.5829	0.150223	10.537	5.83197e-26	3.09845e-24
PF3D7_1011200	BET1	BET1-like protein, putative	1142.64	1.58235	0.237039	6.67549	2.46404e-11	2.06595e-10
PF3D7_1333400		AMMECR1 domain-containing protein, putative	4637.14	1.58164	0.167138	9.46306	2.99065e-21	9.2229e-20
PF3D7_0312000		conserved protein, unknown function	1345.92	1.57481	0.166912	9.435	3.90987e-21	1.19888e-19
PF3D7_0513100		conserved protein, unknown function	1003.4	1.57107	0.189857	8.27506	1.28392e-16	2.31192e-15
PF3D7_1000900		erythrocyte membrane protein 1 (PfEMP1), pseudogene	39.8827	1.57036	0.652457	2.40683	0.0160915	0.0292603
PF3D7_0313700		conserved Plasmodium protein, unknown function	2319.58	1.57019	0.165042	9.51387	1.8369e-21	5.82309e-20
PF3D7_0414600	APH	acylated pleckstrin-homology domain-containing protein, putative	6354.02	1.56904	0.14188	11.0589	1.98513e-28	1.26812e-26
PF3D7_1034700		ADP-ribosylation factor, putative	3025.88	1.56868	0.167545	9.36272	7.77113e-21	2.27868e-19
PF3D7_1354400		V-type proton ATPase 21 kDa proteolipid subunit, putative	4741.54	1.56743	0.195795	8.00542	1.19056e-15	1.87348e-14
PF3D7_0203300	ERCC1	ERCC1 nucleotide excision repair protein, putative	2173.14	1.56711	0.143521	10.9191	9.34542e-28	5.63455e-26
PF3D7_1034400	SDHA	flavoprotein subunit of succinate dehydrogenase	3253.75	1.56428	0.170559	9.17151	4.66421e-20	1.23902e-18
PF3D7_0925500	TLP2	thioredoxin-like protein 2	1188.31	1.56097	0.237165	6.58179	4.64832e-11	3.72281e-10
PF3D7_1421500	TIM8	mitochondrial import inner membrane translocase subunit TIM8, putative	215.048	1.55835	0.368053	4.23405	2.29517e-05	7.47775e-05
PF3D7_1218400		triose or hexose phosphate/phosphate translocator, putative	12051.7	1.55625	0.184545	8.43289	3.37243e-17	6.46302e-16
PF3D7_1118400	HAD4	haloacid dehalogenase-like hydrolase, putative	4008.91	1.55301	0.151637	10.2416	1.29035e-24	5.72235e-23
PF3D7_1317000	USP39	U4/U6.U5 tri-snRNP-associated protein 2, putative	6588.55	1.55107	0.154046	10.0689	7.58441e-24	3.13061e-22
PF3D7_1338000		LMBR1 domain-containing protein, putative	5259.44	1.54979	0.139946	11.0742	1.67339e-28	1.08186e-26
PF3D7_0718800		conserved protein, unknown function	59.3613	1.54816	0.509172	3.04054	0.00236156	0.00517229
PF3D7_1235600	SHMT	serine hydroxymethyltransferase	24943.4	1.54713	0.13509	11.4526	2.28261e-30	1.9442e-28
PF3D7_1439000	CTR1	copper transporter	6279.26	1.54642	0.173813	8.89702	5.73655e-19	1.33836e-17
PF3D7_0316800		40S ribosomal protein S15A, putative	36275	1.54436	0.129662	11.9106	1.04238e-32	1.11868e-30
PF3D7_1303600		conserved Plasmodium protein, unknown function	1297.58	1.5423	0.164208	9.39237	5.86668e-21	1.73926e-19
PF3D7_1430800	PIP3	PhIL1 interacting protein PIP3	126.824	1.5375	0.349179	4.4032	1.06667e-05	3.71913e-05
PF3D7_0418900		conserved protein, unknown function	1068.99	1.53638	0.172247	8.91964	4.67824e-19	1.11571e-17
PF3D7_1109900	RPL36	60S ribosomal protein L36	13670.8	1.53638	0.163704	9.3851	6.2855e-21	1.85319e-19
PF3D7_0524200		conserved Plasmodium membrane protein, unknown function	326.122	1.536	0.346512	4.43274	9.30425e-06	3.27387e-05
PF3D7_1015700.2		tubulin binding cofactor c, putative	132.654	1.53522	0.349427	4.39353	1.11524e-05	3.87339e-05
PF3D7_0919300	TrxL1	thioredoxin-like protein 1, putative	6811.58	1.53213	0.151897	10.0866	6.33083e-24	2.654e-22
PF3D7_1340900	PiT	sodium-dependent phosphate transporter	5191.95	1.5317	0.205748	7.44452	9.7297e-14	1.13253e-12
PF3D7_1332000	SYN5	syntaxin, Qa-SNARE family	5946.45	1.52996	0.134413	11.3825	5.10853e-30	4.03123e-28
PF3D7_0104000	TRSP	thrombospondin-related sporozoite protein	283.545	1.52837	0.270276	5.65485	1.55983e-08	8.58469e-08
PF3D7_1110700	ALP1	actin-like protein, putative	3891.47	1.52493	0.169553	8.99381	2.38795e-19	5.95988e-18
PF3D7_0508300	TPT	triose phosphate transporter	2532.55	1.5248	0.163279	9.33861	9.76096e-21	2.78603e-19
PF3D7_0526200	ARFGAP2	ADP-ribosylation factor GTPase-activating protein 2	397.605	1.51673	0.270472	5.60771	2.05026e-08	1.10793e-07
PF3D7_1350600		conserved Plasmodium protein, unknown function	132.814	1.51439	0.338463	4.47431	7.66581e-06	2.73866e-05
PF3D7_1147400		conserved Plasmodium protein, unknown function	7729.09	1.51298	0.175278	8.63192	6.03283e-18	1.29489e-16
PF3D7_1006900		PPPDE peptidase, putative	1914.31	1.51067	0.203773	7.41349	1.23022e-13	1.40455e-12
PF3D7_MIT02300		erythrocyte membrane protein 1 (PfEMP1), pseudogene	9305.67	1.50972	0.166928	9.04415	1.50829e-19	3.8911e-18
PF3D7_1235700		ATP synthase subunit beta, mitochondrial	5281.14	1.4961	0.156665	9.54962	1.30172e-21	4.20783e-20
PF3D7_0315100	eIF4E	eukaryotic translation initiation factor 4E	1320.4	1.49585	0.180439	8.29009	1.13164e-16	2.04457e-15
PF3D7_0923100		OTU domain-containing protein, putative	168.661	1.49488	0.35144	4.25359	2.10368e-05	6.91688e-05
PF3D7_1224500	ASF1	histone chaperone ASF1	3032.48	1.49243	0.166817	8.94654	3.66786e-19	8.90576e-18
PF3D7_0821800	SEC61B	protein transport protein SEC61 subunit beta, putative	18183.5	1.49034	0.134186	11.1065	1.16651e-28	7.72776e-27
PF3D7_1366500	NDK	nucleoside diphosphate kinase	5220.38	1.48559	0.143829	10.3289	5.21729e-25	2.52216e-23
PF3D7_1406800	GAPM3	glideosome associated protein with multiple membrane spans 3	36823.3	1.48539	0.13121	11.3207	1.03635e-29	7.61787e-28
PF3D7_1404100		cytochrome c, putative	8418.04	1.47595	0.146009	10.1086	5.06097e-24	2.13836e-22
PF3D7_0632400	RIF	rifin	251.761	1.47508	0.272321	5.41671	6.07059e-08	3.02459e-07
PF3D7_0936600	GEXP5	gametocyte exported protein 5	1065.11	1.47457	0.228555	6.4517	1.106e-10	8.38248e-10
PF3D7_1113300	UGT	UDP-galactose transporter, putative	5650.94	1.47313	0.140122	10.5132	7.51053e-26	3.91277e-24
PF3D7_1328700		Plasmodium RNA of unknown function RUF1	51.4474	1.47208	0.542794	2.71204	0.00668707	0.0133592
PF3D7_1310900		ribosomal protein S15, mitochondrial, putative	2200.78	1.46899	0.147376	9.96765	2.11159e-23	8.21071e-22
PF3D7_1341300		60S ribosomal protein L18-2, putative	39394.3	1.46894	0.134986	10.8822	1.40138e-27	8.17368e-26
PF3D7_0933600	QCR1	mitochondrial-processing peptidase subunit beta, putative	6547.42	1.46702	0.232801	6.30163	2.94528e-10	2.07952e-09
PF3D7_0918000	GAP50	glideosome-associated protein 50	49490.7	1.46531	0.128954	11.363	6.39067e-30	4.96991e-28
PF3D7_1459700		pyridoxal 5'-phosphate synthase, putative	1973.6	1.46369	0.212204	6.89757	5.2901e-12	4.89426e-11
PF3D7_0723600		proteasome assembly chaperone 4, putative	2214.31	1.46248	0.168613	8.67357	4.18769e-18	9.23472e-17
PF3D7_1034900	MRScyt	methionine--tRNA ligase	28216	1.46227	0.1458	10.0292	1.13385e-23	4.54049e-22
PF3D7_0823900	DTC	dicarboxylate/tricarboxylate carrier	2838.47	1.46129	0.181347	8.05798	7.7568e-16	1.2537e-14
PF3D7_0406100		V-type proton ATPase subunit B	19421.3	1.46022	0.127325	11.4685	1.89993e-30	1.64436e-28
PF3D7_0520500		phosphomethylpyrimidine kinase, putative	2475.04	1.45839	0.144963	10.0604	8.26846e-24	3.33598e-22
PF3D7_0937500	RIF	rifin	69.7071	1.45746	0.446079	3.26726	0.00108593	0.00256249
PF3D7_0830400		CRA domain-containing protein, putative	22413	1.45733	0.184618	7.89375	2.93235e-15	4.31043e-14
PF3D7_0730400	IMP2	IMP1-like protein, putative	14453.1	1.45732	0.168363	8.65583	4.89325e-18	1.06737e-16
PF3D7_1430900	COX2B	cytochrome c oxidase subunit 2B, putative	5939.31	1.45712	0.162728	8.95432	3.41842e-19	8.41433e-18
PF3D7_0312400	GSK3	glycogen synthase kinase 3	21620.8	1.4564	0.125567	11.5986	4.19027e-31	3.81102e-29
PF3D7_0613000.2		conserved Plasmodium protein, unknown function	7192.87	1.45496	0.166526	8.73714	2.39078e-18	5.3454e-17
PF3D7_0306000	QCR8	cytochrome b-c1 complex subunit 8, putative	1701.02	1.45466	0.161465	9.00917	2.07613e-19	5.2303e-18
PF3D7_1213700	RPB8	DNA-directed RNA polymerases I, II, and III subunit RPABC3, putative	2203.21	1.45248	0.174463	8.32539	8.40541e-17	1.55529e-15
PF3D7_0518300		proteasome subunit beta type-1, putative	16352.4	1.45	0.142991	10.1405	3.65279e-24	1.55563e-22
PF3D7_0718500		prefoldin subunit 3, putative	14339	1.44872	0.186888	7.75183	9.05775e-15	1.2151e-13
PF3D7_0621350	SYS1	protein SYS1, putative	187.353	1.44456	0.293049	4.92942	8.24748e-07	3.4575e-06
PF3D7_1241700	RFC4	replication factor C subunit 4, putative	5136.74	1.44385	0.167075	8.64191	5.52802e-18	1.20095e-16
PF3D7_0813800	GMD	GDP-mannose 4,6-dehydratase	988.995	1.44286	0.188577	7.6513	1.98961e-14	2.5788e-13
PF3D7_1233800		conserved protein, unknown function	7912.51	1.44263	0.168933	8.53964	1.34639e-17	2.74705e-16
PF3D7_0613400	RPL18	50S ribosomal protein L18, apicoplast, putative	8768.37	1.44253	0.13887	10.3876	2.82255e-25	1.40239e-23
PF3D7_0914800		GINS complex subunit Psf3, putative	3898.5	1.44184	0.149872	9.62049	6.55168e-22	2.18362e-20
PF3D7_1407100	NOP1	rRNA 2'-O-methyltransferase fibrillarin, putative	4740.89	1.44172	0.149018	9.67479	3.85898e-22	1.32739e-20
PF3D7_0303900		phosphatidylethanolamine-binding protein, putative	213.945	1.4398	0.354536	4.06108	4.88452e-05	0.000150894
PF3D7_1330400		ER lumen protein retaining receptor 1, putative	7358.34	1.43861	0.178835	8.04434	8.67086e-16	1.38889e-14
PF3D7_1435400	EMC4	ER membrane protein complex subunit 4, putative	4980.33	1.43776	0.194994	7.37339	1.66345e-13	1.84423e-12
PF3D7_1464700		ATP synthase (C/AC39) subunit, putative	4874.13	1.43714	0.12935	11.1104	1.11616e-28	7.58138e-27
PF3D7_0702500		Plasmodium exported protein, unknown function	2059.44	1.43414	0.213842	6.70652	1.99326e-11	1.69238e-10
PF3D7_1130310		small nucleolar RNA snoR14a	43.337	1.43331	0.621564	2.30597	0.0211125	0.0373524
PF3D7_1348100		GTPase, putative	1264.79	1.43061	0.214555	6.6678	2.59666e-11	2.16698e-10
PF3D7_0925600		zinc binding protein (Yippee), putative	2039.12	1.43041	0.453994	3.15072	0.00162866	0.00367665
PF3D7_1219900		ribulose-phosphate 3-epimerase, putative	1630.41	1.42938	0.177301	8.06187	7.51383e-16	1.21859e-14
PF3D7_0306300	GRX1	glutaredoxin 1	17697.6	1.42687	0.171183	8.33537	7.72534e-17	1.4344e-15
PF3D7_1031700	I3	protein phosphatase inhibitor 3	4307.74	1.42666	0.198632	7.18242	6.84861e-13	6.947e-12
PF3D7_1304700	CYC4	cyclin	676.281	1.42513	0.189483	7.52118	5.42848e-14	6.56063e-13
PF3D7_1474800		proteasome subunit alpha type-1, putative	5665.58	1.424	0.149733	9.51026	1.90181e-21	5.96791e-20
PF3D7_0617800	H2A	histone H2A	128702	1.42389	0.382025	3.72723	0.000193593	0.000532454
PF3D7_1204900		conserved Plasmodium protein, unknown function	7427.61	1.41997	0.163841	8.66678	4.44513e-18	9.73575e-17
PF3D7_0514600		ribose-5-phosphate isomerase, putative	1566.53	1.4199	0.201801	7.0361	1.97689e-12	1.92173e-11
PF3D7_0917900	BIP	heat shock protein 70	92527.4	1.41723	0.153708	9.22024	2.96434e-20	7.99328e-19
PF3D7_1331800		60S ribosomal protein L23, putative	24934.5	1.41707	0.161521	8.77331	1.73493e-18	3.92811e-17
PF3D7_0106400		pre-rRNA-processing protein TSR2, putative	5216.1	1.41514	0.164765	8.58888	8.78183e-18	1.84797e-16
PF3D7_1041300	VAR	erythrocyte membrane protein 1, PfEMP1	3833.88	1.41512	0.153846	9.1983	3.63654e-20	9.75683e-19
PF3D7_1135100	PPM8	protein phosphatase PPM8, putative	3552.42	1.41388	0.182277	7.75677	8.71171e-15	1.1755e-13
PF3D7_0606900	GLP2	glutaredoxin-like protein	3229.64	1.4041	0.158167	8.87729	6.85061e-19	1.5845e-17
PF3D7_0925400		protein phosphatase-beta	352.126	1.40258	0.257239	5.45244	4.96821e-08	2.51742e-07
PF3D7_0719000		conserved protein, unknown function	2033.17	1.40166	0.225217	6.22359	4.85914e-10	3.36875e-09
PF3D7_1366800		phosphatidylserine synthase, putative	4891.77	1.4014	0.207909	6.74044	1.57907e-11	1.37394e-10
PF3D7_1402550		ribosomal protein S27a, putative	167.405	1.40089	0.321544	4.35675	1.32007e-05	4.50318e-05
PF3D7_1469200	SHLP1	shewanella-like protein phosphatase 1, putative	5525.93	1.39943	0.132192	10.5863	3.44924e-26	1.85086e-24
PF3D7_1130200	PfP0	60S ribosomal protein P0	107757	1.39744	0.138603	10.0823	6.61667e-24	2.75233e-22
PF3D7_0206800	MSP2	merozoite surface protein 2	271948	1.39563	0.129092	10.8111	3.04932e-27	1.75943e-25
PF3D7_0206700	ADSL	adenylosuccinate lyase	271937	1.3955	0.129104	10.8091	3.11688e-27	1.77927e-25
PF3D7_0305700		ubiquitin-conjugating enzyme MMS2, putative	11299	1.39198	0.142925	9.73921	2.05145e-22	7.24217e-21
PF3D7_1300600	RIF	rifin	266.214	1.39039	0.251218	5.53459	3.1195e-08	1.63469e-07
PF3D7_1024500		conserved Plasmodium protein, unknown function	1453.17	1.38838	0.210058	6.60952	3.85575e-11	3.1396e-10
PF3D7_1110600		ribosomal protein L11, mitochondrial, putative	3941.37	1.38767	0.167757	8.27186	1.31888e-16	2.35904e-15
PF3D7_1211400	PfJ4	heat shock protein DNAJ homologue Pfj4	16986.9	1.38222	0.15138	9.13082	6.79805e-20	1.77943e-18
PF3D7_0721100		conserved protein, unknown function	41061.9	1.38152	0.161728	8.54227	1.31606e-17	2.70573e-16
PF3D7_0300100	VAR	erythrocyte membrane protein 1, PfEMP1	3801.76	1.37818	0.143186	9.6251	6.26469e-22	2.10102e-20
PF3D7_0717000		conserved Plasmodium membrane protein, unknown function	3723.62	1.37713	0.182553	7.54369	4.56846e-14	5.57145e-13
PF3D7_1449200		conserved Plasmodium protein, unknown function	84606.2	1.37332	0.13647	10.0631	8.04115e-24	3.26885e-22
PF3D7_1327800		ribose-phosphate pyrophosphokinase, putative	1882.94	1.37042	0.234073	5.85465	4.78008e-09	2.80021e-08
PF3D7_0812600		ubiquitin-conjugating enzyme E2, putative	2063.42	1.36784	0.157018	8.71138	3.00203e-18	6.6842e-17
PF3D7_0106100		V-type proton ATPase subunit C, putative	1784.35	1.3673	0.202967	6.73659	1.6215e-11	1.40338e-10
PF3D7_0212600	SPATR	secreted protein with altered thrombospondin repeat domain	16043.5	1.36606	0.137907	9.90571	3.93157e-23	1.46506e-21
PF3D7_1353800		proteasome subunit alpha type-4, putative	6037.93	1.36582	0.17002	8.03329	9.48962e-16	1.51552e-14
PF3D7_1356900	PK5	protein kinase 5	4509.93	1.3651	0.161698	8.44226	3.11267e-17	6.00813e-16
PF3D7_0906500		arginase	10161.1	1.36509	0.132458	10.3058	6.63163e-25	3.12152e-23
PF3D7_0507100	RPL4	60S ribosomal protein L4	53403.8	1.36339	0.15039	9.06571	1.238e-19	3.20924e-18
PF3D7_1451100	eEF2	elongation factor 2	43111.8	1.36213	0.172397	7.90113	2.76382e-15	4.08558e-14
PF3D7_1135900		3-oxo-5-alpha-steroid 4-dehydrogenase, putative	29265	1.36138	0.124695	10.9177	9.48464e-28	5.65496e-26
PF3D7_1340700	RAB11b	ras-related protein Rab-11B	4825.77	1.36134	0.152634	8.91895	4.70718e-19	1.11764e-17
PF3D7_0320000	I2	protein phosphatase inhibitor 2	12019	1.35821	0.140272	9.68271	3.57134e-22	1.2444e-20
PF3D7_1471500	TMEM43	transmembrane protein 43, putative	1704.83	1.35707	0.179413	7.56394	3.91052e-14	4.84616e-13
PF3D7_0606200	PEX4	ubiquitin-conjugating enzyme E2 PEX4, putative	7265.83	1.35681	0.133659	10.1513	3.27005e-24	1.42659e-22
PF3D7_0904500		prefoldin subunit 4, putative	2154.72	1.35504	0.172093	7.87387	3.43828e-15	4.99995e-14
PF3D7_1111100	RFC5	replication factor C subunit 5, putative	8853.41	1.35469	0.180426	7.50825	5.99212e-14	7.16119e-13
PF3D7_1253300		Plasmodium exported protein (PHISTa), unknown function, pseudogene	3858.27	1.35356	0.174049	7.7769	7.43214e-15	1.01737e-13
PF3D7_0935500	GEXP22	Plasmodium exported protein, unknown function	3870.49	1.35112	0.17099	7.90175	2.7501e-15	4.07653e-14
PF3D7_1113400	DSK2	ubiquitin domain-containing protein DSK2, putative	13707	1.35031	0.141499	9.54284	1.38975e-21	4.46552e-20
PF3D7_0307100	RPS12	40S ribosomal protein S12, putative	17432.4	1.34667	0.177203	7.59958	2.97098e-14	3.75998e-13
PF3D7_1355300	SET6	histone-lysine N-methyltransferase, putative	740.509	1.34624	0.29944	4.49588	6.92842e-06	2.48848e-05
PF3D7_0614300	MFR1	major facilitator superfamily-related transporter, putative	24193.4	1.34613	0.152061	8.85257	8.55289e-19	1.95297e-17
PF3D7_1001500	ETRAMP10	early transcribed membrane protein 10.1	13824.4	1.33907	0.164112	8.1595	3.36423e-16	5.67687e-15
PF3D7_0723200		conserved Plasmodium protein, unknown function	188.674	1.33891	0.335343	3.99265	6.53403e-05	0.000196754
PF3D7_0812400	KARalpha	karyopherin alpha	18715.8	1.33843	0.155233	8.62203	6.57748e-18	1.40616e-16
PF3D7_1311500	RPT1	26S protease regulatory subunit 7, putative	15986.3	1.33718	0.135057	9.90087	4.1267e-23	1.52716e-21
PF3D7_1135700		conserved Plasmodium protein, unknown function	2917.32	1.33673	0.148371	9.0094	2.0719e-19	5.2303e-18
PF3D7_1349100		nucleoside diphosphate hydrolase, putative	1975.42	1.33646	0.16289	8.20469	2.31185e-16	4.04084e-15
PF3D7_1340600	DBR1	RNA lariat debranching enzyme, putative	3179.16	1.33282	0.154395	8.63251	6.00194e-18	1.29343e-16
PF3D7_0219200	RPS30	40S ribosomal protein S30	21549.5	1.33101	0.176028	7.56134	3.98951e-14	4.93265e-13
PF3D7_1355100	MCM6	DNA replication licensing factor MCM6	12047.6	1.33089	0.193222	6.8879	5.66224e-12	5.22055e-11
PF3D7_1223200		nucleus export protein BRR6, putative	2710.66	1.32965	0.170718	7.78861	6.77478e-15	9.39366e-14
PF3D7_1322900		conserved protein, unknown function	639.651	1.32884	0.201704	6.58808	4.45547e-11	3.5737e-10
PF3D7_1115600	CYP19B	peptidyl-prolyl cis-trans isomerase	37221.5	1.32756	0.126717	10.4766	1.10637e-25	5.70845e-24
PF3D7_1402600		small nucleolar RNA snoR22	105.055	1.3265	0.385977	3.43674	0.000588758	0.00147011
PF3D7_0613000.3		conserved Plasmodium protein, unknown function	4122.15	1.32631	0.168027	7.89343	2.94003e-15	4.31043e-14
PF3D7_0936400	REX4	ring-exported protein 4	422.731	1.32395	0.243569	5.4356	5.46119e-08	2.74389e-07
PF3D7_1021000		conserved protein, unknown function	2995.8	1.32391	0.183431	7.21746	5.29689e-13	5.4977e-12
PF3D7_0306900		40S ribosomal protein S23, putative	38379.1	1.32159	0.141981	9.30821	1.29999e-20	3.67239e-19
PF3D7_0929800		conserved Plasmodium protein, unknown function	98.9092	1.32124	0.499252	2.64644	0.00813445	0.0159246
PF3D7_0705900		ATP synthase subunit C, putative	16728.3	1.32105	0.140538	9.3999	5.46169e-21	1.62819e-19
PF3D7_1310300		zinc finger protein, putative	485.157	1.31938	0.223231	5.91037	3.41345e-09	2.04426e-08
PF3D7_1116700	DPAP1	dipeptidyl aminopeptidase 1	11801.9	1.31846	0.157805	8.35496	6.54569e-17	1.21959e-15
PF3D7_1347200	NT1	nucleoside transporter 1	55857.7	1.31612	0.140841	9.34471	9.21387e-21	2.64394e-19
PF3D7_1334800	MSRP2	MSP7-like protein	5826.08	1.31558	0.152988	8.59925	8.02384e-18	1.70181e-16
PF3D7_1476600		Plasmodium exported protein, unknown function	2532.13	1.31556	0.14728	8.93241	4.16821e-19	1.00299e-17
PF3D7_0409700	RF2	peptide chain release factor 2	4752.73	1.3153	0.158963	8.27422	1.29301e-16	2.32051e-15
PF3D7_1423600		calcium-dependent protein kinase, putative	6828.41	1.31441	0.132583	9.91383	3.62463e-23	1.36012e-21
PF3D7_0521400		conserved protein, unknown function	2450.48	1.31052	0.237183	5.52538	3.2878e-08	1.70953e-07
PF3D7_1019900	ATG8	autophagy-related protein 8	3335.89	1.30822	0.183137	7.14338	9.10659e-13	9.08289e-12
PF3D7_1210100	SYN2	syntaxin, Qa-SNARE family	5733.64	1.30692	0.142957	9.14205	6.1282e-20	1.61196e-18
PF3D7_1030200	CLAMP	claudin-like apicomplexan microneme protein, putative	22905.2	1.30659	0.150646	8.67326	4.19916e-18	9.23472e-17
PF3D7_1357100		elongation factor 1-alpha	46955.7	1.30463	0.12854	10.1496	3.32679e-24	1.43964e-22
PF3D7_1364800	RPB5	DNA-directed RNA polymerases I, II, and III subunit RPABC1, putative	5379.58	1.30239	0.140568	9.26521	1.94699e-20	5.38533e-19
PF3D7_1143200		DnaJ protein, putative	11699.8	1.30224	0.129345	10.0679	7.65909e-24	3.1373e-22
PF3D7_1338300	EF-1gamma	elongation factor 1-gamma, putative	37417.4	1.30111	0.140957	9.23055	2.69255e-20	7.33413e-19
PF3D7_0912700		conserved Plasmodium protein, unknown function	2317.22	1.29902	0.165291	7.85901	3.87167e-15	5.59983e-14
PF3D7_1105100	H2B	histone H2B	355252	1.29828	0.179656	7.22646	4.95742e-13	5.18548e-12
PF3D7_1362000	ApiCOX24	cytochrome c oxidase subunit ApiCOX24, putative	1804.15	1.29738	0.179839	7.21413	5.42807e-13	5.62298e-12
PF3D7_1456800	VP1	V-type H(+)-translocating pyrophosphatase, putative	8144.95	1.29515	0.158487	8.17197	3.03401e-16	5.16842e-15
PF3D7_1143800	CAP93	oocyst capsule protein Cap93, putative	3182.14	1.29335	0.160256	8.07053	6.99936e-16	1.14508e-14
PF3D7_1123200	LRR11	leucine-rich repeat protein	1119.4	1.29217	0.173402	7.45186	9.20312e-14	1.07356e-12
PF3D7_1129000	SpdSyn	spermidine synthase	4598.03	1.29008	0.192608	6.69797	2.11328e-11	1.79145e-10
PF3D7_1019500		TMEM94 domain-containing protein, putative	10670	1.29006	0.145616	8.85931	8.05099e-19	1.84622e-17
PF3D7_1342800	PEPCK	phosphoenolpyruvate carboxykinase	3707.52	1.2887	0.17847	7.22084	5.16665e-13	5.38334e-12
PF3D7_1408100	PMIII	plasmepsin III	7622.58	1.28837	0.17219	7.48224	7.30639e-14	8.63571e-13
PF3D7_1148900		Plasmodium exported protein, unknown function	351.397	1.28794	0.236991	5.43457	5.49281e-08	2.75719e-07
PF3D7_0523100	QCR2	mitochondrial-processing peptidase subunit alpha, putative	3215.42	1.28788	0.19181	6.71436	1.8889e-11	1.61399e-10
PF3D7_1232200	LPD1	dihydrolipoyl dehydrogenase, mitochondrial	935.121	1.28774	0.195007	6.60354	4.01452e-11	3.25406e-10
PF3D7_1027700	CEN3	centrin-3	10341.4	1.28755	0.138372	9.30497	1.34033e-20	3.76557e-19
PF3D7_0105400.2		conserved Plasmodium protein, unknown function	3909.87	1.28618	0.156958	8.19445	2.51751e-16	4.38602e-15
PF3D7_1430200	PMIX	plasmepsin IX	18039.5	1.28369	0.136191	9.42568	4.27314e-21	1.29546e-19
PF3D7_0815400	ATPTG3	ATP synthase-associated protein, putative	2299.02	1.28288	0.193494	6.63005	3.35564e-11	2.76171e-10
PF3D7_0317600	RPS11	40S ribosomal protein S11, putative	28469	1.28284	0.146609	8.75007	2.13212e-18	4.78701e-17
PF3D7_1402500		ribosomal protein S27a, putative	14028.1	1.28117	0.156001	8.21261	2.16434e-16	3.79538e-15
PF3D7_0310700	TRAPPC4	trafficking protein particle complex subunit 4, putative	2015.91	1.27983	0.211693	6.04567	1.48793e-09	9.4848e-09
PF3D7_0516200	RPS11	40S ribosomal protein S11	16600.1	1.27804	0.133458	9.57638	1.00511e-21	3.28865e-20
PF3D7_0623300		EGF-like membrane protein, putative	5921.03	1.27691	0.165079	7.73515	1.03279e-14	1.37177e-13
PF3D7_1410600	eIF2gamma	eukaryotic translation initiation factor 2 subunit gamma, putative	22986	1.27628	0.130653	9.76847	1.53755e-22	5.46389e-21
PF3D7_1240300	VAR	erythrocyte membrane protein 1, PfEMP1	456.878	1.27521	0.210906	6.04636	1.48151e-09	9.46403e-09
PF3D7_1429600	GEXP03	conserved Plasmodium protein, unknown function	1032.68	1.26856	0.195176	6.49956	8.05552e-11	6.22852e-10
PF3D7_0504900		transmembrane protein TMEM222, putative	4062.17	1.26837	0.158611	7.99675	1.27742e-15	2.00427e-14
PF3D7_0925700	HDAC1	histone deacetylase 1	3900.68	1.26768	0.166288	7.62341	2.47052e-14	3.17149e-13
PF3D7_0213800		conserved protein, unknown function	145.943	1.26678	0.363483	3.48512	0.000491915	0.00124746
PF3D7_0102300		Plasmodium exported protein, unknown function	6080.65	1.26611	0.187381	6.75689	1.40981e-11	1.2341e-10
PF3D7_0929200		RNA-binding protein, putative	15945.4	1.26584	0.15986	7.91844	2.40504e-15	3.60487e-14
PF3D7_1122300		conserved Plasmodium protein, unknown function	798.313	1.26498	0.184181	6.86811	6.50584e-12	5.94724e-11
PF3D7_1420900		mannose-1-phosphate guanyltransferase, putative	3632.04	1.26414	0.171398	7.37547	1.6377e-13	1.81944e-12
PF3D7_1405200	BET5	trafficking protein particle complex subunit 1, putative	257.752	1.26408	0.285617	4.42578	9.60943e-06	3.37462e-05
PF3D7_1027700.2		centrin-3	7217.68	1.26006	0.148522	8.48398	2.17618e-17	4.29316e-16
PF3D7_1201900		conserved protein, unknown function	1758.54	1.25991	0.161895	7.78227	7.12327e-15	9.77583e-14
PF3D7_1015700		tubulin binding cofactor c, putative	1316.48	1.25893	0.230414	5.46376	4.66143e-08	2.37317e-07
PF3D7_1318200	G3PAT	glycerol-3-phosphate 1-O-acyltransferase	148.407	1.25891	0.42926	2.93274	0.00335989	0.00713462
PF3D7_1426000	RPL21	60S ribosomal protein L21	42807.8	1.25799	0.16216	7.75771	8.64783e-15	1.17479e-13
PF3D7_1304100	LigI	DNA ligase I	1181.03	1.25685	0.186812	6.72789	1.72135e-11	1.47788e-10
PF3D7_1007200		rho GTPase-activating protein, putative	7223.02	1.25505	0.147558	8.50548	1.80841e-17	3.63443e-16
PF3D7_0110400	RPB9	DNA-directed RNA polymerase II subunit RPB9, putative	7070.79	1.2544	0.15319	8.18852	2.64463e-16	4.56305e-15
PF3D7_1252200	CHT1	chitinase	812.7	1.25366	0.180654	6.93959	3.93245e-12	3.68264e-11
PF3D7_1011900	HO	heme oxygenase	7707.21	1.25093	0.141013	8.87108	7.24419e-19	1.66834e-17
PF3D7_0423900		probable protein, unknown function	5625.29	1.25055	0.155099	8.06295	7.44755e-16	1.2147e-14
PF3D7_1368900		conserved protein, unknown function	5996.97	1.25045	0.180096	6.94325	3.83186e-12	3.60101e-11
PF3D7_0109850		phosphatidate cytidylyltransferase, putative	2142.18	1.24765	0.167666	7.44131	9.96943e-14	1.15542e-12
PF3D7_1203700	NAPL	nucleosome assembly protein	35927.8	1.24656	0.152266	8.18673	2.6843e-16	4.61665e-15
PF3D7_0722700	C3AP1	respiratory chain complex 3 associated protein 1	3222.4	1.24308	0.160912	7.72524	1.11638e-14	1.47914e-13
PF3D7_1123700		ribosomal protein L37, mitochondrial, putative	2106.04	1.2424	0.182939	6.79131	1.11117e-11	9.82299e-11
PF3D7_1033200	ETRAMP10.2	early transcribed membrane protein 10.2	4624.93	1.24036	0.204407	6.06808	1.2945e-09	8.35896e-09
PF3D7_0416700		CDGSH iron-sulfur domain-containing protein, putative	2704.71	1.23852	0.167222	7.4064	1.29769e-13	1.47218e-12
PF3D7_1116800	HSP101	heat shock protein 101	23566.4	1.23851	0.171141	7.23677	4.59501e-13	4.81579e-12
PF3D7_0807900	TyrRS	tyrosine--tRNA ligase	5715.27	1.2377	0.138416	8.94191	3.82498e-19	9.24543e-18
PF3D7_0205500		DNA-directed RNA polymerase II 16 kDa subunit, putative	7066.97	1.23545	0.16875	7.32119	2.45789e-13	2.65373e-12
PF3D7_1226600	PCNA2	proliferating cell nuclear antigen 2	4781.53	1.23064	0.16293	7.55316	4.24811e-14	5.21633e-13
PF3D7_1459900		rhoptry protein, putative	1304.66	1.2306	0.166712	7.38162	1.56371e-13	1.75277e-12
PF3D7_1414300		60S ribosomal protein L10, putative	29811.5	1.22603	0.124457	9.85098	6.78768e-23	2.47773e-21
PF3D7_0628300	CEPT	choline/ethanolaminephosphotransferase, putative	200234	1.22508	0.135525	9.03949	1.57408e-19	4.04139e-18
PF3D7_1029400	CDC50C	LEM3/CDC50 family protein, putative	4328.93	1.22426	0.166059	7.37245	1.67515e-13	1.85338e-12
PF3D7_0528700	CYP23	peptidyl-prolyl cis-trans isomerase	2162.95	1.22423	0.147501	8.29984	1.04256e-16	1.90285e-15
PF3D7_0912400		alkaline phosphatase, putative	6354.66	1.22379	0.153245	7.98583	1.39582e-15	2.17731e-14
PF3D7_0422400	RPS19	40S ribosomal protein S19	29487.8	1.22333	0.132311	9.24593	2.332e-20	6.38443e-19
PF3D7_0207300	SERA8	serine repeat antigen 8	56.5742	1.22307	0.501349	2.43956	0.0147052	0.0269219
PF3D7_0524400	RBG1	ribosome-interacting GTPase 1, putative	7104.67	1.22289	0.157057	7.78626	6.90219e-15	9.4967e-14
PF3D7_0524500		conserved Plasmodium protein, unknown function	786.008	1.22084	0.220844	5.52809	3.23739e-08	1.68823e-07
PF3D7_1368100	RPN11	26S proteasome regulatory subunit RPN11, putative	4073.01	1.22068	0.167665	7.28042	3.32777e-13	3.54302e-12
PF3D7_0203800		conserved Plasmodium protein, unknown function	1443.31	1.21961	0.172255	7.08026	1.43887e-12	1.41669e-11
PF3D7_0419000		conserved Plasmodium protein, unknown function	1342.34	1.21897	0.166183	7.33508	2.21593e-13	2.40703e-12
PF3D7_0223500	VAR	erythrocyte membrane protein 1, PfEMP1	319.364	1.21556	0.241542	5.03248	4.84185e-07	2.10717e-06
PF3D7_1012400	HGPRT	hypoxanthine-guanine phosphoribosyltransferase	112390	1.21245	0.175361	6.91403	4.71064e-12	4.38842e-11
PF3D7_0209600		transporter, putative	7571.48	1.21236	0.156347	7.75428	8.88441e-15	1.19483e-13
PF3D7_1200200	RIF	rifin	47.3606	1.21229	0.52739	2.29865	0.0215247	0.0379439
PF3D7_0917600	PRP43	pre-mRNA-splicing factor ATP-dependent RNA helicase PRP43, putative	2357.37	1.21152	0.184327	6.57268	4.94189e-11	3.94616e-10
PF3D7_1310600	RAB5b	ras-related protein Rab-5B	9774.86	1.21045	0.139394	8.68367	3.83204e-18	8.49699e-17
PF3D7_0100400	RIF	rifin	257.007	1.20738	0.283409	4.2602	2.04242e-05	6.7361e-05
PF3D7_0707420		AAA family ATPase, putative	94.3024	1.20669	0.444427	2.71515	0.00662457	0.0132541
PF3D7_1446200	LAP	M17 leucyl aminopeptidase	17517.3	1.20649	0.128877	9.36153	7.85917e-21	2.27959e-19
PF3D7_1412500	ACT2	actin II	1803.61	1.20613	0.17762	6.7905	1.11742e-11	9.86195e-11
PF3D7_0611700	RPL39	60S ribosomal protein L39	11400.4	1.20468	0.135624	8.88254	6.53491e-19	1.51802e-17
PF3D7_1432700		protein-L-isoaspartate(D-aspartate) O-methyltransferase, putative	6802.25	1.20359	0.144925	8.30489	9.99129e-17	1.83187e-15
PF3D7_1010800		50S ribosomal protein L22, mitochondrial, putative	1376.78	1.20226	0.179163	6.71045	1.94029e-11	1.65526e-10
PF3D7_0610800	TK	transketolase	18839.7	1.20125	0.153998	7.80042	6.17013e-15	8.62211e-14
PF3D7_0508000	P38	6-cysteine protein	32455.6	1.19863	0.161363	7.42816	1.10119e-13	1.27075e-12
PF3D7_0632700	RIF	rifin	70.5706	1.19838	0.54651	2.19279	0.0283225	0.0484934
PF3D7_1408900		tRNA-dihydrouridine synthase, putative	591.534	1.19808	0.257034	4.66118	3.14403e-06	1.18725e-05
PF3D7_1447700		conserved protein, unknown function	934.662	1.19672	0.172303	6.94544	3.77289e-12	3.55181e-11
PF3D7_0708700	COX4	cytochrome c oxidase subunit 4, putative	4397.17	1.19642	0.149627	7.99602	1.28504e-15	2.01035e-14
PF3D7_1358400		conserved Plasmodium protein, unknown function	2080.02	1.19465	0.196674	6.07429	1.24534e-09	8.05118e-09
PF3D7_0115600	RIF	rifin	77.0969	1.18821	0.435929	2.72569	0.00641678	0.0128719
PF3D7_0400200		erythrocyte membrane protein 1 (PfEMP1), exon 2, pseudogene	27303.9	1.1875	0.14906	7.9666	1.63099e-15	2.50053e-14
PF3D7_1246400	MTIP	myosin A-tail interacting protein	35201.8	1.18296	0.12498	9.46518	2.93044e-21	9.08946e-20
PF3D7_0813900	RPS16	40S ribosomal protein S16, putative	22573.1	1.18266	0.155503	7.6054	2.84034e-14	3.60314e-13
PF3D7_1419500		conserved Plasmodium protein, unknown function	1173.4	1.18243	0.183825	6.43236	1.25636e-10	9.44207e-10
PF3D7_0916300		conserved Plasmodium protein, unknown function	1572.02	1.18089	0.157903	7.47859	7.51255e-14	8.85986e-13
PF3D7_0626300	FabB/FabF	3-oxoacyl-acyl-carrier protein synthase I/II	636.993	1.18001	0.191922	6.14839	7.82717e-10	5.26984e-09
PF3D7_0413400	VAR	erythrocyte membrane protein 1 (PfEMP1), exon 1, pseudogene	85.5417	1.17938	0.447767	2.63391	0.00844087	0.0164227
PF3D7_1248300		conserved protein, unknown function	493.138	1.17848	0.231202	5.09719	3.44728e-07	1.54666e-06
PF3D7_1403700	TRAM	translocation associated membrane protein, putative	612.701	1.17766	0.255493	4.60938	4.03875e-06	1.50291e-05
PF3D7_0928300		conserved Plasmodium protein, unknown function	1688.47	1.17691	0.171716	6.85378	7.19213e-12	6.55228e-11
PF3D7_1116400	SEC12	guanine nucleotide-exchange factor SEC12	2623.23	1.17552	0.14914	7.88198	3.22234e-15	4.69866e-14
PF3D7_0936200		Plasmodium exported protein (hyp11), unknown function	1781.97	1.17241	0.177116	6.61945	3.6054e-11	2.94918e-10
PF3D7_1112000		conserved protein, unknown function	11265.4	1.17224	0.150079	7.81081	5.68226e-15	8.00289e-14
PF3D7_1454700	6PGD	6-phosphogluconate dehydrogenase, decarboxylating	9363.03	1.17221	0.156403	7.49483	6.63847e-14	7.91601e-13
PF3D7_1214400	EMC6	ER membrane protein complex subunit 6, putative	721.837	1.17213	0.192319	6.09471	1.09633e-09	7.20947e-09
PF3D7_1342100	IRP	aconitate hydratase	3619.43	1.16946	0.162503	7.19651	6.17714e-13	6.33401e-12
PF3D7_1012500		phosphoglucomutase, putative	3372.86	1.16881	0.161168	7.25215	4.10195e-13	4.3159e-12
PF3D7_1212800	SDHB	succinate dehydrogenase [ubiquinone] iron-sulfur subunit, mitochondrial	3689.74	1.16717	0.145598	8.01641	1.08879e-15	1.72343e-14
PF3D7_0900500	RIF	rifin	753.094	1.16594	0.196878	5.92213	3.1779e-09	1.91173e-08
PF3D7_0207700	SERA4	serine repeat antigen 4	22177.1	1.16582	0.142849	8.16116	3.31836e-16	5.6349e-15
PF3D7_0217400		conserved protein, unknown function	3165.09	1.16337	0.169947	6.8455	7.62106e-12	6.90788e-11
PF3D7_1350100	KRS1	lysine--tRNA ligase	18257.7	1.1606	0.142309	8.15546	3.47848e-16	5.80122e-15
PF3D7_0927800	COX5B	cytochrome c oxidase subunit 5B, putative	7477.58	1.15753	0.156625	7.39049	1.46292e-13	1.64807e-12
PF3D7_1123900	SNU13	13 kDa ribonucleoprotein-associated protein, putative	9934.42	1.15706	0.12639	9.15471	5.4505e-20	1.44076e-18
PF3D7_1226300	HAD2	haloacid dehalogenase-like hydrolase, putative	15813.9	1.15586	0.190181	6.07769	1.21925e-09	7.91114e-09
PF3D7_0529500		cell cycle regulator protein, putative	1124.82	1.15509	0.176766	6.53458	6.37902e-11	5.01169e-10
PF3D7_0605200		acylphosphatase, putative	8182.83	1.15391	0.173641	6.64538	3.02435e-11	2.49672e-10
PF3D7_0932600	RPS6	apicoplast ribosomal protein S6, putative	1065.2	1.15299	0.180958	6.37161	1.87058e-10	1.35277e-09
PF3D7_0318700		conserved Plasmodium protein, unknown function	1856.1	1.15083	0.420259	2.73839	0.00617417	0.0124224
PF3D7_1127100	dUTPase	deoxyuridine 5'-triphosphate nucleotidohydrolase	16727.7	1.14986	0.142779	8.0534	8.0528e-16	1.29764e-14
PF3D7_0522300		18S rRNA (guanine-N(7))-methyltransferase, putative	6502.14	1.14949	0.142585	8.06182	7.51682e-16	1.21859e-14
PF3D7_0809500		histone acetyltransferase subunit NuA4, putative	515.465	1.14913	0.237963	4.82903	1.37202e-06	5.55223e-06
PF3D7_0619400		cell division cycle protein 48 homologue, putative	18936.2	1.14902	0.141347	8.12908	4.32552e-16	7.14177e-15
PF3D7_1247800	DPAP2	dipeptidyl aminopeptidase 2	3383.22	1.14809	0.14919	7.69553	1.40914e-14	1.85785e-13
PF3D7_0606800	VFT1	VFT protein	5233.49	1.1439	0.145853	7.84286	4.40389e-15	6.35249e-14
PF3D7_1144100		mitochondrial large subunit ribosomal protein, putative	2251.12	1.14279	0.153257	7.45667	8.87387e-14	1.03741e-12
PF3D7_0932200	PFN	profilin	145549	1.14173	0.144429	7.9051	2.67716e-15	3.99045e-14
PF3D7_1239100		ribosomal protein L23, mitochondrial, putative	1663.18	1.14132	0.171155	6.66834	2.58721e-11	2.16246e-10
PF3D7_0818900	HSP70	heat shock protein 70	128267	1.14065	0.146243	7.79968	6.20637e-15	8.65022e-14
PF3D7_1435000	COX15	cytochrome c oxidase assembly protein COX15, putative	2739.15	1.14046	0.149916	7.60735	2.79777e-14	3.55754e-13
PF3D7_1463200	RFC3	replication factor C subunit 3, putative	3062.13	1.14046	0.183573	6.21255	5.21308e-10	3.59093e-09
PF3D7_0320100	SEC22	protein transport protein SEC22	5702.92	1.14011	0.165015	6.90916	4.87516e-12	4.51815e-11
PF3D7_1323100		60S ribosomal protein L6, putative	12138.2	1.13963	0.162093	7.03072	2.05468e-12	1.99375e-11
PF3D7_1431700		60S ribosomal protein L14, putative	23428.7	1.1392	0.139095	8.1901	2.61005e-16	4.51791e-15
PF3D7_0309300		N2227-like protein, putative	3767.91	1.13911	0.423363	2.69063	0.00713169	0.0141317
PF3D7_0812300	SSP3	sporozoite surface protein 3, putative	277.036	1.1391	0.260639	4.37042	1.24008e-05	4.27376e-05
PF3D7_0708300	BUD32	EKC/KEOPS complex subunit BUD32	618.171	1.13899	0.277363	4.10649	4.01725e-05	0.000125914
PF3D7_1365900		ubiquitin-60S ribosomal protein L40	43971.7	1.13694	0.135958	8.36238	6.1468e-17	1.14926e-15
PF3D7_1016900	ETRAMP10.3	early transcribed membrane protein 10.3	5740.5	1.13486	0.13378	8.48305	2.19373e-17	4.30039e-16
PF3D7_1007000	TMEM147	transmembrane protein 147, putative	4366.89	1.13406	0.164539	6.89233	5.48852e-12	5.06909e-11
PF3D7_0703700		conserved protein, unknown function	4427.21	1.13359	0.137874	8.22187	2.00346e-16	3.52478e-15
PF3D7_1109500		small nucleolar RNA snoR09	81.7567	1.13036	0.422648	2.67446	0.00748497	0.0147663
PF3D7_1465000	COX6A	cytochrome c oxidase subunit 6A, putative	3978.12	1.12908	0.155313	7.26974	3.60175e-13	3.81203e-12
PF3D7_1121600	EXP1	exported protein 1	161414	1.12702	0.154524	7.29353	3.01946e-13	3.24048e-12
PF3D7_1212600		SND2 domain-containing protein, putative	1900.14	1.12695	0.172507	6.53274	6.4576e-11	5.05124e-10
PF3D7_0910300		conserved protein, unknown function	1688.85	1.126	0.204446	5.50759	3.63779e-08	1.87336e-07
PF3D7_1361600	YfhJ	Fe-S assembly protein IscX, putative	834.12	1.12452	0.183895	6.11501	9.65531e-10	6.39234e-09
PF3D7_0213700		conserved protein, unknown function	1162.4	1.12217	0.22643	4.95593	7.19848e-07	3.0415e-06
PF3D7_1248000		tRNA-splicing endonuclease, putative	221.474	1.11952	0.28986	3.86228	0.000112333	0.00032338
PF3D7_0306700	EMC5	ER membrane protein complex subunit 5, putative	3385.92	1.11804	0.144354	7.74511	9.54982e-15	1.27473e-13
PF3D7_1104700.2		DNA-directed RNA polymerase III subunit RPC8, putative	5592.63	1.11686	0.165992	6.72841	1.71522e-11	1.47498e-10
PF3D7_0310800		conserved Plasmodium protein, unknown function	3763.45	1.11552	0.136747	8.15753	3.41954e-16	5.75212e-15
PF3D7_0627900	POP4	ribonuclease P protein subunit p29, putative	2540.56	1.11527	0.201984	5.52159	3.35938e-08	1.74169e-07
PF3D7_1347500	ALBA4	DNA/RNA-binding protein Alba 4	48963.8	1.11505	0.150278	7.41992	1.17195e-13	1.34374e-12
PF3D7_1027400	RPB7	DNA-directed RNA polymerase II subunit RPB7, putative	2697.79	1.11165	0.14673	7.57616	3.55939e-14	4.43148e-13
PF3D7_0908000	PMP1	plasma membrane protein 1, putative	4573.58	1.11073	0.139578	7.95776	1.75186e-15	2.67059e-14
PF3D7_1004800	AAC2	ADP,ATP carrier protein 2	3382.79	1.11047	0.148232	7.49141	6.81353e-14	8.10675e-13
PF3D7_0721600		40S ribosomal protein S5, putative	40047.6	1.11038	0.124692	8.90498	5.33978e-19	1.25585e-17
PF3D7_1434400		conserved protein, unknown function	6919.68	1.10982	0.161963	6.85227	7.26865e-12	6.61078e-11
PF3D7_1215300	CPN10	10 kDa chaperonin	3034.85	1.10971	0.176171	6.29904	2.99495e-10	2.11181e-09
PF3D7_0108000		proteasome subunit beta type-3, putative	19561.9	1.10822	0.144969	7.64457	2.09648e-14	2.70425e-13
PF3D7_1429000		protein archease, putative	698.167	1.10755	0.198392	5.58263	2.36907e-08	1.26866e-07
PF3D7_0905700.3		autophagy-related protein 3, putative	2742.76	1.10692	0.14571	7.59674	3.0369e-14	3.82535e-13
PF3D7_1214600		adrenodoxin-type ferredoxin, putative	2187.19	1.10516	0.163961	6.74037	1.5798e-11	1.37394e-10
PF3D7_1343700	Kelch13	kelch protein K13	5853.71	1.10486	0.159775	6.9151	4.67541e-12	4.36317e-11
PF3D7_1366100	DIP13	DIP13 homolog, putative	2765.8	1.1045	0.161554	6.8367	8.10393e-12	7.30852e-11
PF3D7_1476400	FIKK14	serine/threonine protein kinase, FIKK family, pseudogene	386.939	1.10446	0.28745	3.84228	0.000121895	0.000348476
PF3D7_1022900	ApiCOX13	cytochrome c oxidase subunit ApiCOX13, putative	1190.3	1.10435	0.196384	5.62343	1.87206e-08	1.01675e-07
PF3D7_1214500		conserved Plasmodium protein, unknown function	510.891	1.10345	0.330724	3.33648	0.000848472	0.00204901
PF3D7_0919400	PDI-Trans	protein disulfide-isomerase PDI-Trans	3594.17	1.10317	0.171269	6.44115	1.18573e-10	8.94886e-10
PF3D7_0608500		proteasome subunit alpha type-2, putative	13685.7	1.10214	0.154887	7.11577	1.11287e-12	1.10586e-11
PF3D7_0214200	mRPL13	ribosomal protein L13, mitochondrial	3314.3	1.10174	0.168616	6.534	6.40355e-11	5.0236e-10
PF3D7_1449300	BRF1	transcription factor IIIb subunit, putative	5677.9	1.10112	0.153585	7.16948	7.52821e-13	7.60761e-12
PF3D7_1125000		conserved protein, unknown function	6230.11	1.09901	0.134764	8.15507	3.48978e-16	5.80122e-15
PF3D7_0515900	NIF2	NLI interacting factor-like phosphatase, putative	3590.02	1.09881	0.134288	8.18253	2.77955e-16	4.7652e-15
PF3D7_0608400	C4AP4	respiratory chain complex 4 associated protein 4	1569.83	1.09851	0.234478	4.68493	2.8006e-06	1.06506e-05
PF3D7_0932500	DHHC6	palmitoyltransferase DHHC6, putative	804.632	1.09779	0.226655	4.84345	1.27604e-06	5.20702e-06
PF3D7_1356600		regulator of chromosome condensation, putative	2291.83	1.09469	0.145659	7.51547	5.67077e-14	6.82272e-13
PF3D7_1353100		Plasmodium exported protein, unknown function	505.364	1.09256	0.199943	5.46432	4.64672e-08	2.37018e-07
PF3D7_0502900		Tim10/DDP family zinc finger protein, putative	4417.61	1.09148	0.182343	5.98587	2.15231e-09	1.33057e-08
PF3D7_0520000	RPS9	40S ribosomal protein S9, putative	54257.1	1.08785	0.130714	8.32236	8.62326e-17	1.59012e-15
PF3D7_1105400	RPS4	40S ribosomal protein S4, putative	23279.9	1.08674	0.133413	8.14564	3.77294e-16	6.24865e-15
PF3D7_1223800	YHM2	citrate/oxoglutarate carrier protein, putative	1596.14	1.08442	0.180791	5.99818	1.99536e-09	1.24356e-08
PF3D7_1114100.2		rhomboid protease ROM1	11635.7	1.08367	0.132473	8.18028	2.83178e-16	4.83928e-15
PF3D7_1439600	NDUFA4	cytochrome c oxidase subunit NDUFA4, putative	4536.58	1.08359	0.15215	7.12189	1.06454e-12	1.0598e-11
PF3D7_1422000	COX14	cytochrome c oxidase assembly protein COX14, putative	963.906	1.08199	0.182016	5.94449	2.77316e-09	1.68908e-08
PF3D7_1230400	ClpQ	ATP-dependent protease subunit ClpQ	1063.5	1.08066	0.237155	4.55677	5.19469e-06	1.90012e-05
PF3D7_1465400		conserved protein, unknown function	1758.25	1.07579	0.146374	7.34964	1.98737e-13	2.17637e-12
PF3D7_1104700	RPC25	DNA-directed RNA polymerase III subunit RPC8, putative	2439.36	1.07458	0.185171	5.80317	6.50734e-09	3.74661e-08
PF3D7_0204900	COQ5	2-methoxy-6-polyprenyl-1,4-benzoquinol methylase, mitochondrial, putative	8108.93	1.0719	0.129205	8.29611	1.07577e-16	1.95681e-15
PF3D7_1100200	VAR	erythrocyte membrane protein 1, PfEMP1	266.185	1.07166	0.272218	3.93676	8.25878e-05	0.000243498
PF3D7_1372200	HRPIII	histidine-rich protein III	5211.13	1.07142	0.145903	7.34337	2.08278e-13	2.26698e-12
PF3D7_0826200		alpha/beta hydrolase, putative	614.756	1.07108	0.19731	5.42838	5.68671e-08	2.84389e-07
PF3D7_1413800	DPH1	diphthamide biosynthesis protein 1, putative	570.686	1.07068	0.203535	5.26043	1.43719e-07	6.80065e-07
PF3D7_1127500		protein disulfide-isomerase, putative	3364.27	1.07017	0.171202	6.25093	4.08027e-10	2.84717e-09
PF3D7_1451500		pre-mRNA-splicing factor CWF18, putative	352.482	1.06698	0.306831	3.47742	0.000506265	0.00127961
PF3D7_0109950	C2AP3	respiratory chain complex 2 associated protein 3	2328.08	1.06642	0.176581	6.03928	1.548e-09	9.83024e-09
PF3D7_0512600	RAB1b	ras-related protein Rab-1B	18090.3	1.06396	0.126002	8.44398	3.06724e-17	5.94181e-16
PF3D7_0207500	SERA6	serine repeat antigen 6	27030.1	1.06395	0.165832	6.41582	1.40066e-10	1.04388e-09
PF3D7_1030400		conserved protein, unknown function	128.251	1.06304	0.332403	3.19804	0.00138364	0.00317154
PF3D7_0505200	ALP2b	actin-like protein, putative	6149.99	1.06288	0.129715	8.19401	2.52657e-16	4.38756e-15
PF3D7_0423500	GAPM2	glideosome associated protein with multiple membrane spans 2	39127.4	1.0609	0.130092	8.15499	3.49197e-16	5.80122e-15
PF3D7_0814600	PIMMS22	PIMMS22 protein, putative	442.324	1.06033	0.256301	4.13703	3.51823e-05	0.000111314
PF3D7_0902800	SERA9	serine repeat antigen 9	6399.31	1.05817	0.155755	6.79383	1.09192e-11	9.66876e-11
PF3D7_0507500	SUB1	subtilisin-like protease 1	18974.2	1.05486	0.139842	7.54323	4.58488e-14	5.57879e-13
PF3D7_1246200	ACT1	actin I	407352	1.05388	0.160184	6.57918	4.73058e-11	3.78305e-10
PF3D7_1115900	DHHC9	palmitoyltransferase DHHC9	3722.98	1.0537	0.170026	6.19727	5.74511e-10	3.94728e-09
PF3D7_0207900	SERA2	serine repeat antigen 2	1805.4	1.05336	0.164482	6.40407	1.51285e-10	1.11664e-09
PF3D7_0301900		conserved protein, unknown function	1736.62	1.05254	0.451071	2.33342	0.0196264	0.0349768
PF3D7_1030800		calmodulin, putative	2413.16	1.05247	0.156696	6.7166	1.86013e-11	1.59448e-10
PF3D7_0514500		conserved Plasmodium membrane protein, unknown function	149.585	1.05243	0.308775	3.40841	0.000653437	0.00161583
PF3D7_0504100		AN1-type zinc finger protein, putative	2237.29	1.05134	0.144363	7.28259	3.27467e-13	3.49342e-12
PF3D7_0211300		ubiquinol-cytochrome-c reductase complex assembly factor 1, putative	701.072	1.04685	0.219855	4.76157	1.92093e-06	7.5625e-06
PF3D7_1120100	PGM1	phosphoglycerate mutase, putative	30168.4	1.04651	0.142204	7.35924	1.84955e-13	2.04211e-12
PF3D7_0832100	RIF	rifin, pseudogene	186.077	1.04585	0.343565	3.04412	0.00233362	0.00511736
PF3D7_1332200		conserved protein, unknown function	18078.3	1.04327	0.139643	7.47094	7.96223e-14	9.34908e-13
PF3D7_1000200	RIF	rifin	498.751	1.04324	0.222343	4.69204	2.70495e-06	1.03306e-05
PF3D7_1367000	SKP1	suppressor of kinetochore protein 1, putative	11497.8	1.04178	0.144828	7.19321	6.32853e-13	6.44381e-12
PF3D7_1349700		peptidase, putative	2144.29	1.0404	0.171787	6.05634	1.39256e-09	8.9277e-09
PF3D7_0932300	M18AAP	M18 aspartyl aminopeptidase	6870.81	1.03974	0.134027	7.75771	8.64743e-15	1.17479e-13
PF3D7_0207800	SERA3	serine repeat antigen 3	15508.5	1.03748	0.139484	7.438	1.0222e-13	1.18214e-12
PF3D7_1454600		ribosomal protein S11, mitochondrial, putative	1106.62	1.0362	0.188568	5.49513	3.90426e-08	2.00289e-07
PF3D7_0915100	UBC9	SUMO-conjugating enzyme UBC9	3679.03	1.03605	0.176295	5.87679	4.18302e-09	2.47749e-08
PF3D7_0904400	SPC3	signal peptidase complex subunit 3, putative	8099.87	1.03438	0.150675	6.86499	6.64981e-12	6.06852e-11
PF3D7_0526400		conserved Plasmodium protein, unknown function	3363.33	1.03425	0.140206	7.37667	1.62304e-13	1.80689e-12
PF3D7_0311500		conserved protein, unknown function	2396.46	1.03349	0.148855	6.94299	3.83896e-12	3.60137e-11
PF3D7_1320600	RAB11a	ras-related protein Rab-11A	17900.3	1.03342	0.134482	7.68443	1.53678e-14	2.01623e-13
PF3D7_0106300	ATP6	calcium-transporting ATPase	25539.3	1.0334	0.136973	7.54455	4.53861e-14	5.54764e-13
PF3D7_0415900		60S ribosomal protein L15, putative	51921.6	1.03334	0.154946	6.669	2.57558e-11	2.1561e-10
PF3D7_0302200	CLAG3.2	cytoadherence linked asexual protein 3.2	2192.06	1.03246	0.160381	6.43753	1.21431e-10	9.13884e-10
PF3D7_1474100		ribosomal protein L20, mitochondrial, putative	4468.32	1.03232	0.15741	6.55821	5.44585e-11	4.31646e-10
PF3D7_0402900		probable protein, unknown function	150.131	1.03044	0.337009	3.05761	0.00223107	0.00491257
PF3D7_1420600	PANK1	pantothenate kinase 1	3298.69	1.02971	0.173556	5.93297	2.97506e-09	1.80183e-08
PF3D7_0805600	PAP2	phosphatidic acid phosphatase 2	7835.43	1.02941	0.128915	7.98512	1.40385e-15	2.1835e-14
PF3D7_1331300	SEC11	signal peptidase complex catalytic subunit SEC11	7869	1.02853	0.152835	6.72968	1.70038e-11	1.46457e-10
PF3D7_0324900	VAR	erythrocyte membrane protein 1, PfEMP1	161.391	1.02806	0.325053	3.16275	0.00156287	0.00354303
PF3D7_0313300		YGGT family protein, putative	721.378	1.0272	0.268742	3.82225	0.000132238	0.000376639
PF3D7_1405600	RNR	ribonucleoside-diphosphate reductase small chain, putative	8167.91	1.02518	0.156491	6.55107	5.71256e-11	4.51452e-10
PF3D7_1115700	FP2A	cysteine proteinase falcipain 2a	22043.9	1.02502	0.128943	7.94944	1.87362e-15	2.84006e-14
PF3D7_0407500		mitochondrial carrier protein, putative	285.944	1.02445	0.296272	3.45781	0.000544582	0.00136808
PF3D7_0903200	RAB7	ras-related protein RAB7	28258.5	1.02272	0.124016	8.24667	1.62864e-16	2.8938e-15
PF3D7_1471100	EXP2	exported protein 2	50677.3	1.02189	0.129913	7.86594	3.66349e-15	5.31305e-14
PF3D7_1108700	Pfj2	heat shock protein J2	11531.8	1.02137	0.187901	5.43568	5.45871e-08	2.74389e-07
PF3D7_0822000		ribosomal protein L4, mitochondrial, putative	886.166	1.02002	0.19398	5.25839	1.45326e-07	6.87064e-07
PF3D7_0610600	CDPK2	calcium-dependent protein kinase 2	4848.05	1.02001	0.138234	7.37883	1.59682e-13	1.7814e-12
PF3D7_1240100	ETRAMP12	early transcribed membrane protein 12	1095.8	1.01885	0.180725	5.63758	1.72452e-08	9.40424e-08
PF3D7_0314100		vesicle transport v-SNARE protein, putative	11450.6	1.01815	0.134005	7.59784	3.01113e-14	3.80182e-13
PF3D7_1441700	ATP23	mitochondrial inner membrane protease ATP23, putative	980.621	1.01732	0.184688	5.50833	3.62255e-08	1.8673e-07
PF3D7_1019500.2		TMEM94 domain-containing protein, putative	2222.46	1.01636	0.153954	6.60173	4.06397e-11	3.28918e-10
PF3D7_0501100.2		heat shock protein 40, type II	5364.78	1.01372	0.164994	6.14397	8.04854e-10	5.40532e-09
PF3D7_0207400	SERA7	serine repeat antigen 7	18643.7	1.01275	0.152675	6.63338	3.28081e-11	2.70428e-10
PF3D7_0220800	CLAG2	cytoadherence linked asexual protein 2	13926.3	1.0125	0.185437	5.46006	4.7598e-08	2.41637e-07
PF3D7_1221600		protein TSSC1, putative	1071.25	1.0108	0.216429	4.67036	3.00679e-06	1.13989e-05
PF3D7_0708900	SCO1	protein SCO1, putative	1401.41	1.00973	0.15847	6.3717	1.86939e-10	1.35277e-09
PF3D7_0408600	SIAP1	sporozoite invasion-associated protein 1	537.773	1.00943	0.209979	4.80731	1.52974e-06	6.11667e-06
PF3D7_1331900		small nucleolar RNA snoR18	93.194	1.00943	0.402329	2.50897	0.0121085	0.0226944
PF3D7_1107500		prefoldin, putative	1420.49	1.00937	0.181286	5.56782	2.57947e-08	1.36908e-07
PF3D7_0314400	PPP6	serine/threonine protein phosphatase 6, putative	985.678	1.00907	0.182341	5.53399	3.13028e-08	1.63874e-07
PF3D7_1037300	AAC1	ADP,ATP carrier protein 1	5530.37	1.00702	0.17824	5.64977	1.60667e-08	8.80254e-08
PF3D7_1114100	ROM1	rhomboid protease ROM1	5319.13	1.00275	0.12876	7.78775	6.82131e-15	9.4338e-14
PF3D7_1423300	PP7	serine/threonine protein phosphatase 7	18516.6	1.00197	0.138003	7.26051	3.85633e-13	4.06544e-12
PF3D7_1006600	PhLP3	phosducin-like protein 3, putative	2129.41	1.00072	0.169421	5.90672	3.48984e-09	2.08536e-08
PF3D7_1021400		endomembrane protein 70, putative	4280.08	0.999601	0.16325	6.12314	9.17488e-10	6.10067e-09
PF3D7_1353700	ROMO1	reactive oxygen species modulator 1, putative	1009.36	0.99874	0.211856	4.71425	2.42607e-06	9.35221e-06
PF3D7_1132200	TCP1	T-complex protein 1 subunit alpha	15140.6	0.998252	0.127397	7.83577	4.65969e-15	6.66771e-14
PF3D7_1202400	CYP26	peptidyl-prolyl cis-trans isomerase	4211.49	0.99809	0.136126	7.33212	2.26533e-13	2.45463e-12
PF3D7_0906890		conserved Plasmodium protein, unknown function	161.586	0.997625	0.370442	2.69307	0.00707975	0.0140392
PF3D7_1251200		coronin	120685	0.99739	0.133223	7.48664	7.06598e-14	8.36999e-13
PF3D7_1414800	SMB1	small nuclear ribonucleoprotein-associated protein B, putative	3079.43	0.997048	0.149307	6.67784	2.42492e-11	2.03951e-10
PF3D7_1475800		conserved Plasmodium protein, unknown function	320.355	0.99415	0.26923	3.69257	0.000222	0.00060439
PF3D7_1205700	tGLO2	targeted glyoxalase II	1353.49	0.991652	0.187026	5.30222	1.14401e-07	5.4664e-07
PF3D7_1320900		RNA-binding protein, putative	3051.03	0.990793	0.165051	6.00293	1.93787e-09	1.20914e-08
PF3D7_1144700	TIC20	apicoplast import protein Tic20, putative	5684.55	0.988096	0.15589	6.33842	2.32133e-10	1.66083e-09
PF3D7_1438600	GET4	Golgi to ER traffic protein 4	1371.47	0.986956	0.182653	5.40346	6.53671e-08	3.23579e-07
PF3D7_1403900	CPPED1	serine/threonine protein phosphatase CPPED1, putative	1119.02	0.986442	0.240481	4.10195	4.09679e-05	0.000128183
PF3D7_1245800	EpsL	epsin-like protein, putative	3551.12	0.986113	0.135231	7.29204	3.05295e-13	3.26989e-12
PF3D7_0501100	HSP40	heat shock protein 40, type II	7024.87	0.983668	0.16112	6.10518	1.02688e-09	6.76934e-09
PF3D7_0933700		conserved Plasmodium protein, unknown function	4994.72	0.980001	0.147381	6.64944	2.94219e-11	2.43263e-10
PF3D7_1327200	RPR2	ribonuclease P protein subunit RPR2, putative	1018.18	0.977732	0.193213	5.06039	4.18407e-07	1.84636e-06
PF3D7_0805000		alpha/beta hydrolase, putative	717.385	0.9776	0.301554	3.24187	0.00118749	0.00276927
PF3D7_0314100.2		vesicle transport v-SNARE protein, putative	335.67	0.977005	0.244098	4.00252	6.26712e-05	0.00018971
PF3D7_1422500	HRD1	ERAD-associated E3 ubiquitin-protein ligase HRD1	2086.72	0.976541	0.152297	6.4121	1.43531e-10	1.0638e-09
PF3D7_1448800		Appr-1-p processing domain protein	1066.24	0.975252	0.223848	4.35675	1.32007e-05	4.50318e-05
PF3D7_0205600		conserved Plasmodium protein, unknown function	3852.47	0.974897	0.143331	6.80171	1.03387e-11	9.20026e-11
PF3D7_1438100	SEC62	translocation protein SEC62, putative	4261.99	0.974894	0.1747	5.58038	2.39997e-08	1.28014e-07
PF3D7_1133400	AMA1	apical membrane antigen 1	34720.8	0.974651	0.148589	6.55937	5.4037e-11	4.28939e-10
PF3D7_0715000	PNPase	4-nitrophenylphosphatase	5033.23	0.971788	0.141434	6.87095	6.37761e-12	5.83997e-11
PF3D7_1226900	PV2	parasitophorous vacuolar protein 2	1642.03	0.970887	0.159513	6.08658	1.15348e-09	7.54828e-09
PF3D7_0715300		calcium/calmodulin-dependent protein kinase, putative	2752.56	0.969807	0.1386	6.99718	2.61161e-12	2.49802e-11
PF3D7_1370300	MAHRP1	membrane associated histidine-rich protein 1	1723.58	0.968995	0.18041	5.37107	7.82705e-08	3.82862e-07
PF3D7_1117500	TyrRSapi	tyrosine--tRNA ligase	842.61	0.968898	0.22849	4.24043	2.23089e-05	7.29492e-05
PF3D7_0532100	ETRAMP5	early transcribed membrane protein 5	64470.1	0.96751	0.134816	7.17653	7.15032e-13	7.23936e-12
PF3D7_0314300	DER1-2	DER1-like protein	239.83	0.965899	0.325994	2.96293	0.00304722	0.00651709
PF3D7_1450100	SRP54	signal recognition particle subunit SRP54	8650.96	0.965318	0.146457	6.59113	4.36482e-11	3.50623e-10
PF3D7_1302100	G27/25	gamete antigen 27/25	342.628	0.964002	0.247663	3.8924	9.92582e-05	0.000288214
PF3D7_1111500		acylphosphatase, putative	1700.77	0.963019	0.227419	4.23456	2.28996e-05	7.46532e-05
PF3D7_0104800	NPT1	novel putative transporter 1, putative	2129.07	0.96276	0.147941	6.50774	7.62898e-11	5.93292e-10
PF3D7_1407700		conserved protein, unknown function	256.875	0.961958	0.298637	3.22116	0.00127671	0.00295167
PF3D7_0724400	PAM18	mitochondrial import inner membrane translocase subunit TIM14, putative	1655.75	0.961889	0.157272	6.1161	9.58947e-10	6.36058e-09
PF3D7_0405800		conserved protein, unknown function	1407.87	0.961294	0.156564	6.13993	8.25571e-10	5.53752e-09
PF3D7_0604200		ribosomal protein L41, mitochondrial, putative	213.985	0.960138	0.33437	2.87148	0.00408554	0.00851215
PF3D7_0905700	ATG3	autophagy-related protein 3, putative	1096.86	0.960054	0.168318	5.70379	1.1717e-08	6.5154e-08
PF3D7_1365200		conserved protein, unknown function	1518.05	0.959822	0.210043	4.56964	4.88555e-06	1.79315e-05
PF3D7_1323200		V-type proton ATPase subunit G, putative	4867.73	0.959632	0.172602	5.5598	2.70078e-08	1.42923e-07
PF3D7_0212900	ATEL1	arginyl-tRNA--protein transferase	11701.3	0.959141	0.12543	7.6468	2.0604e-14	2.66413e-13
PF3D7_1010300	SDH4	succinate dehydrogenase subunit 4, putative	60273	0.957914	0.135475	7.07078	1.54067e-12	1.51414e-11
PF3D7_0918100		cytochrome b5-like heme/steroid binding protein, putative	30880.9	0.95702	0.124936	7.66006	1.85846e-14	2.41465e-13
PF3D7_1406700	VPS29	vacuolar protein sorting-associated protein 29	3074.28	0.955935	0.154755	6.17707	6.53038e-10	4.45165e-09
PF3D7_1450200		conserved Plasmodium protein, unknown function	103.71	0.95503	0.396095	2.41112	0.0159038	0.0289386
PF3D7_0721900		V-type ATPase V0 subunit e, putative	3942.97	0.953257	0.156025	6.10965	9.98528e-10	6.59864e-09
PF3D7_1330000		PITH domain-containing protein, putative	1894.1	0.953127	0.167607	5.68667	1.2954e-08	7.18089e-08
PF3D7_1113800		conserved Plasmodium membrane protein, unknown function	5063.93	0.950591	0.128815	7.37952	1.58862e-13	1.77595e-12
PF3D7_1011500		conserved protein, unknown function	2604.31	0.949463	0.155831	6.0929	1.10882e-09	7.27376e-09
PF3D7_0918200		50S ribosomal protein L3, apicoplast, putative	11716.2	0.948927	0.161494	5.87593	4.20485e-09	2.48768e-08
PF3D7_0918300	EIF3F	eukaryotic translation initiation factor 3 subunit F, putative	2984.8	0.948829	0.186665	5.08307	3.71388e-07	1.65109e-06
PF3D7_0922600		glutamine synthetase, putative	7631.57	0.945625	0.147463	6.41263	1.4303e-10	1.06279e-09
PF3D7_1117700	RAN	GTP-binding nuclear protein RAN/TC4	125647	0.945486	0.151747	6.23068	4.64416e-10	3.22805e-09
PF3D7_0316600	FNT	formate-nitrite transporter	24775	0.943793	0.131164	7.19549	6.22349e-13	6.361e-12
PF3D7_0306800	CCT2	T-complex protein 1 subunit beta	8813.25	0.94315	0.142695	6.60954	3.85516e-11	3.1396e-10
PF3D7_1125600	C4AP1	respiratory chain complex 4 associated protein 1	2613.78	0.941786	0.208951	4.5072	6.56886e-06	2.36567e-05
PF3D7_1427800	RRP41	exosome complex component RRP41	1327.54	0.939955	0.184562	5.0929	3.5263e-07	1.57816e-06
PF3D7_1135400		HotDog domain-containing protein, putative	3666.94	0.939013	0.139349	6.7386	1.59923e-11	1.38635e-10
PF3D7_1401600		Plasmodium exported protein (PHISTb), unknown function	28082	0.93815	0.134618	6.96899	3.1922e-12	3.02639e-11
PF3D7_0725400		conserved Plasmodium protein, unknown function	138704	0.93776	0.144922	6.47081	9.74785e-11	7.45113e-10
PF3D7_0934800	PKAc	cAMP-dependent protein kinase catalytic subunit	46590	0.936092	0.146246	6.40079	1.54573e-10	1.13622e-09
PF3D7_0203200		conserved Plasmodium protein, unknown function	972.915	0.935506	0.203636	4.59401	4.34812e-06	1.61021e-05
PF3D7_1358500		zinc finger protein, putative	1529.83	0.934829	0.196907	4.74758	2.05866e-06	8.05745e-06
PF3D7_1108500	SCS-alpha	succinate--CoA ligase [ADP-forming] subunit alpha, putative	20991.6	0.934224	0.137333	6.80264	1.02719e-11	9.15596e-11
PF3D7_0919500	MFS3	major facilitator superfamily domain-containing protein, putative	383.166	0.9325	0.235759	3.9553	7.64374e-05	0.00022686
PF3D7_1305600	S2P	site-2 protease S2P, putative	1659.23	0.932446	0.196391	4.74791	2.0553e-06	8.05017e-06
PF3D7_1030000	SPT4	transcription elongation factor SPT4, putative	10754.2	0.931017	0.182755	5.09435	3.49941e-07	1.56874e-06
PF3D7_0804000		cactin homolog, putative	13144.1	0.930997	0.141195	6.5937	4.29002e-11	3.45132e-10
PF3D7_1010400		MORN repeat protein, putative	2049.16	0.929121	0.164417	5.65101	1.59506e-08	8.75165e-08
PF3D7_1211900	ATP4	non-SERCA-type Ca2+ -transporting P-ATPase	7639.3	0.929099	0.166319	5.58624	2.32041e-08	1.24513e-07
PF3D7_1404700		cysteine-rich small secreted protein CSS, putative	3894.41	0.927994	0.15428	6.01499	1.79898e-09	1.12772e-08
PF3D7_0928900	GK	guanylate kinase	244.22	0.927882	0.286585	3.23773	0.00120486	0.00280856
PF3D7_0107700		dolichyl-diphosphooligosaccharide--protein glycosyltransferase subunit OST3/OST6, putative	854.937	0.927337	0.185862	4.98939	6.05718e-07	2.60023e-06
PF3D7_0215100		RING zinc finger protein, putative	3195.44	0.926388	0.193984	4.77559	1.79177e-06	7.08001e-06
PF3D7_0203400		conserved protein, unknown function	16888.9	0.926104	0.155488	5.95609	2.58341e-09	1.58068e-08
PF3D7_1255200	VAR	erythrocyte membrane protein 1, PfEMP1	109.466	0.925736	0.353235	2.62074	0.00877404	0.0170031
PF3D7_0105400		conserved Plasmodium protein, unknown function	5642.88	0.925667	0.133528	6.93236	4.13867e-12	3.86901e-11
PF3D7_0423400	AARP	apical asparagine-rich protein AARP	15101.3	0.925028	0.129322	7.15288	8.49751e-13	8.53889e-12
PF3D7_1118100	AP1S	AP-1 complex subunit sigma, putative	2554.73	0.924415	0.147817	6.25376	4.00689e-10	2.7996e-09
PF3D7_0422700	EIF4A3	eukaryotic initiation factor 4A-III, putative	2015.79	0.921502	0.164567	5.59954	2.14915e-08	1.15903e-07
PF3D7_0209400		ARMT1-like domain-containing protein, putative	2836.7	0.920197	0.180463	5.0991	3.41269e-07	1.53243e-06
PF3D7_1015600	HSP60	heat shock protein 60	9848.12	0.920032	0.152212	6.04443	1.49938e-09	9.5441e-09
PF3D7_1324400	PRELID	PRELI domain-containing protein, putative	2295.67	0.919751	0.141977	6.47818	9.28375e-11	7.11665e-10
PF3D7_1303000	ATPTG13	ATP synthase-associated protein, putative	5566.56	0.919351	0.192652	4.77209	1.82323e-06	7.19901e-06
PF3D7_1337200	DXS	1-deoxy-D-xylulose 5-phosphate synthase	1505.46	0.919301	0.210534	4.36652	1.26244e-05	4.3397e-05
PF3D7_0729000	SRP9	signal recognition particle subunit SRP9	825.438	0.919007	0.22237	4.13279	3.58386e-05	0.00011319
PF3D7_0826300		SPRY domain, putative	6803.42	0.918648	0.148712	6.17738	6.51756e-10	4.44952e-09
PF3D7_0206900.2		merozoite surface protein 5	12330.3	0.918589	0.125286	7.33191	2.26891e-13	2.45463e-12
PF3D7_0207600	SERA5	serine repeat antigen 5	86238.3	0.91811	0.143427	6.40125	1.5411e-10	1.13437e-09
PF3D7_0400100	VAR	erythrocyte membrane protein 1, PfEMP1	4758.52	0.917628	0.158428	5.79208	6.9522e-09	3.98563e-08
PF3D7_1216300	SRP19	signal recognition particle subunit SRP19	2901.74	0.917614	0.142666	6.4319	1.26022e-10	9.45783e-10
PF3D7_0319300		ubiquitin-conjugating enzyme E2, putative	1498.58	0.916443	0.183176	5.00308	5.64216e-07	2.4318e-06
PF3D7_0934300	ATP8	ATP synthase-associated protein, putative	3157.59	0.915892	0.156856	5.83907	5.24942e-09	3.05846e-08
PF3D7_1310200		conserved Plasmodium protein, unknown function	6735.54	0.91454	0.145358	6.29163	3.14156e-10	2.20939e-09
PF3D7_1012300	QCR7	cytochrome b-c1 complex subunit 7, putative	7796.05	0.913867	0.154493	5.91526	3.31358e-09	1.99112e-08
PF3D7_0217300	AP2S	AP-2 complex subunit sigma, putative	4985.4	0.912964	0.158373	5.76465	8.18278e-09	4.64152e-08
PF3D7_1431000		ribosomal protein L17, mitochondrial, putative	2138	0.912214	0.167463	5.44727	5.11502e-08	2.58448e-07
PF3D7_1141800		EELM2 domain-containing protein, putative	1360.78	0.911909	0.206475	4.41655	1.00289e-05	3.50588e-05
PF3D7_0306400		FAD-dependent glycerol-3-phosphate dehydrogenase, putative	6039.06	0.911224	0.156818	5.8107	6.22112e-09	3.59338e-08
PF3D7_1356400		phosphatase 2A regulatory subunit-related protein, putative	1007.44	0.911013	0.227138	4.01083	6.05053e-05	0.000183742
PF3D7_1311300		ATP synthase subunit gamma, mitochondrial	1769.64	0.910925	0.195247	4.6655	3.07869e-06	1.16504e-05
PF3D7_1429700		ribosomal protein L15, mitochondrial, putative	10418.5	0.910221	0.132844	6.85179	7.29294e-12	6.62164e-11
PF3D7_0528200	EIF3E	eukaryotic translation initiation factor 3 subunit E, putative	12362.4	0.909659	0.137883	6.59733	4.18639e-11	3.37807e-10
PF3D7_0929000	TAF7	transcription initiation factor TFIID subunit 7, putative	2776.7	0.908838	0.153276	5.92943	3.03992e-09	1.83696e-08
PF3D7_0210800		conserved Plasmodium protein, unknown function	3252.01	0.907697	0.156974	5.78247	7.36136e-09	4.2112e-08
PF3D7_1410200	CTPS	CTP synthase	4588.99	0.907166	0.160455	5.65372	1.57012e-08	8.63244e-08
PF3D7_0318100	STOML	stomatin-like protein, putative	1020.22	0.907033	0.25281	3.58781	0.000333467	0.00087415
PF3D7_1238000		COPI associated protein, putative	2194.12	0.904245	0.162822	5.55357	2.79891e-08	1.47825e-07
PF3D7_0934400	ApiAP2	AP2 domain transcription factor, putative	6409.17	0.902158	0.167344	5.39104	7.00524e-08	3.4518e-07
PF3D7_0823200		RNA-binding protein, putative	9222.34	0.902138	0.157654	5.72227	1.05113e-08	5.86927e-08
PF3D7_0624700	PIGL	N-acetylglucosaminyl-phosphatidylinositol de-N-acetylase, putative	1969.15	0.901497	0.167632	5.37783	7.53872e-08	3.6977e-07
PF3D7_0523600		conserved protein, unknown function	2560.3	0.900704	0.161345	5.58246	2.37135e-08	1.26866e-07
PF3D7_0935100	KSH1	protein kish, putative	498.804	0.899499	0.244193	3.68356	0.000229998	0.00062553
PF3D7_0910600	YKT6.1	SNARE protein	4722.82	0.898976	0.134919	6.66307	2.68162e-11	2.2344e-10
PF3D7_0716200		PDCD2 domain-containing protein, putative	4127.56	0.8988	0.149604	6.00785	1.87995e-09	1.17574e-08
PF3D7_0408500	FEN1	flap endonuclease 1	5498.47	0.898661	0.137294	6.54554	5.92827e-11	4.6781e-10
PF3D7_1404900		conserved Plasmodium protein, unknown function	18330.4	0.897864	0.183219	4.90049	9.55986e-07	3.96431e-06
PF3D7_1119100		tRNA m(1)G methyltransferase, putative	3160.29	0.894459	0.144088	6.20771	5.37639e-10	3.69868e-09
PF3D7_1242000	QSOX	sulfhydryl oxidase, putative	534.603	0.893974	0.220208	4.05969	4.91388e-05	0.000151714
PF3D7_1357800	CCT4	T-complex protein 1 subunit delta	10561	0.893805	0.136201	6.56239	5.29517e-11	4.22198e-10
PF3D7_1407900	PMI	plasmepsin I	11175.9	0.892884	0.156012	5.72317	1.04554e-08	5.84412e-08
PF3D7_0709000	CRT	chloroquine resistance transporter	9314.52	0.89006	0.170119	5.23198	1.67705e-07	7.85672e-07
PF3D7_1126300		DnaJ protein, putative	2141.32	0.888329	0.17541	5.0643	4.09905e-07	1.81332e-06
PF3D7_0314000		HSP20-like chaperone, putative	8833.97	0.88747	0.150456	5.89852	3.66767e-09	2.18432e-08
PF3D7_0935300		phosphatidylinositol N-acetylglucosaminyltransferase subunit P, putative	1549.07	0.887201	0.150071	5.91189	3.38196e-09	2.02866e-08
PF3D7_1311000	ISD11	protein ISD11	685.216	0.88693	0.221188	4.00984	6.07589e-05	0.000184407
PF3D7_1203200	SRP14	signal recognition particle subunit SRP14	2206.4	0.88628	0.159662	5.55098	2.8408e-08	1.49742e-07
PF3D7_0320300	CCT5	T-complex protein 1 subunit epsilon	18837.2	0.885112	0.151085	5.85836	4.67454e-09	2.75039e-08
PF3D7_1358900		GTP-binding protein, putative	5572.21	0.883858	0.136032	6.49743	8.17014e-11	6.30806e-10
PF3D7_1470900		proteasome subunit beta type-2, putative	17280.8	0.88274	0.12693	6.95452	3.53764e-12	3.3362e-11
PF3D7_1352500		thioredoxin-related protein, putative	16324.6	0.882103	0.122143	7.22192	5.12605e-13	5.35143e-12
PF3D7_1335900	TRAP	thrombospondin-related anonymous protein	117.847	0.880927	0.341778	2.57749	0.00995218	0.019093
PF3D7_1236900		conserved Plasmodium protein, unknown function	12977.9	0.880551	0.128807	6.83622	8.13104e-12	7.32067e-11
PF3D7_1371900		Plasmodium exported protein, unknown function	243.889	0.879241	0.303776	2.89438	0.00379913	0.00797893
PF3D7_0927300	FH	fumarate hydratase	5750.4	0.878105	0.146252	6.00404	1.92468e-09	1.20231e-08
PF3D7_1460700	RPL27	60S ribosomal protein L27	34246.8	0.875784	0.169839	5.15655	2.51545e-07	1.14974e-06
PF3D7_1321500	PDEbeta	3',5'-cyclic nucleotide phosphodiesterase beta	12297	0.875653	0.134272	6.52149	6.9613e-11	5.42941e-10
PF3D7_1242700		40S ribosomal protein S17, putative	35785.8	0.873959	0.130278	6.70842	1.9674e-11	1.67307e-10
PF3D7_0820700	KDH	2-oxoglutarate dehydrogenase E1 component	6516.36	0.873469	0.152512	5.72721	1.02097e-08	5.72467e-08
PF3D7_0817500	HINT1	histidine triad nucleotide-binding protein 1	83111.3	0.873341	0.173517	5.03317	4.82429e-07	2.10464e-06
PF3D7_0617300		RNA-binding protein, putative	6060.59	0.87309	0.136928	6.37626	1.81469e-10	1.3185e-09
PF3D7_1422800	ARP4	actin-related protein ARP4	1408.92	0.873085	0.182599	4.78143	1.74048e-06	6.90276e-06
PF3D7_1415000	UDG	uracil-DNA glycosylase	2581	0.873017	0.152198	5.73606	9.69064e-09	5.45073e-08
PF3D7_1400100		erythrocyte membrane protein 1 (PfEMP1), pseudogene	1546.75	0.872581	0.151183	5.77169	7.84806e-09	4.46132e-08
PF3D7_0512300	MAT1	CDK-activating kinase assembly factor MAT1	1461.5	0.872042	0.184475	4.72716	2.27682e-06	8.82124e-06
PF3D7_1471400		diacylglycerol kinase, putative	5179.04	0.871202	0.157712	5.52402	3.31325e-08	1.7211e-07
PF3D7_1211800	PfpUB	polyubiquitin	32045.3	0.870757	0.130223	6.68665	2.2834e-11	1.92956e-10
PF3D7_1302300		Plasmodium exported protein, unknown function	1306.14	0.869934	0.185045	4.7012	2.58636e-06	9.89899e-06
PF3D7_0610500		peptidyl-tRNA hydrolase PTRHD1, putative	163458	0.869901	0.149765	5.80845	6.30541e-09	3.63425e-08
PF3D7_0610400	H3	histone H3	162803	0.869485	0.1511	5.75435	8.69753e-09	4.91791e-08
PF3D7_1343000	PMT	phosphoethanolamine N-methyltransferase	210463	0.869114	0.156406	5.5568	2.74763e-08	1.45259e-07
PF3D7_0406400	cGLO2	cytosolic glyoxalase II	2241.83	0.868511	0.148763	5.83824	5.27557e-09	3.07036e-08
PF3D7_1330100		conserved Plasmodium protein, unknown function	3390.01	0.866459	0.15721	5.51146	3.55866e-08	1.8379e-07
PF3D7_0802800	CNA	serine/threonine protein phosphatase 2B catalytic subunit A	11152.2	0.865332	0.147703	5.85858	4.66845e-09	2.74983e-08
PF3D7_0729200	AOP	1-cys peroxiredoxin	373.475	0.865262	0.293856	2.94451	0.00323471	0.00688787
PF3D7_1116500	FT2	folate transporter 2	6969.54	0.865117	0.229201	3.77449	0.000160335	0.000449039
PF3D7_0800800		Plasmodium exported protein (hyp7), unknown function	1085.03	0.864778	0.189434	4.56505	4.99373e-06	1.83035e-05
PF3D7_1421150		C/D small nucleolar RNA	120.81	0.863737	0.385779	2.23894	0.0251596	0.0436773
PF3D7_1129100	PV1	parasitophorous vacuolar protein 1	56582.7	0.862134	0.136767	6.30368	2.90665e-10	2.05766e-09
PF3D7_0629300	PL	phospholipase, putative	8181.19	0.861184	0.141058	6.10518	1.02688e-09	6.76934e-09
PF3D7_1322500	DHHC5	palmitoyltransferase DHHC5	14365.8	0.861022	0.142421	6.04563	1.4883e-09	9.4848e-09
PF3D7_0626600		conserved Plasmodium protein, unknown function	193.259	0.860936	0.312948	2.75105	0.00594047	0.0119917
PF3D7_1123400	ERF3	eukaryotic peptide chain release factor GTP-binding subunit, putative	11628.4	0.858792	0.175026	4.90666	9.26421e-07	3.85662e-06
PF3D7_0733000	VAR	erythrocyte membrane protein 1, PfEMP1	116.105	0.858645	0.342651	2.50589	0.0122144	0.0228531
PF3D7_0800300	VAR	erythrocyte membrane protein 1, PfEMP1	1251.2	0.858111	0.170935	5.0201	5.16433e-07	2.23843e-06
PF3D7_0627400	TIM22	mitochondrial import inner membrane translocase subunit TIM22, putative	812.191	0.856858	0.192593	4.44907	8.62432e-06	3.05466e-05
PF3D7_0103000		vacuolar protein sorting-associated protein VTA1, putative	809.502	0.85326	0.205681	4.14846	3.3472e-05	0.000106278
PF3D7_0309600	PfP2	60S acidic ribosomal protein P2	47966.8	0.852778	0.140358	6.07571	1.2344e-09	7.99381e-09
PF3D7_1016400	FIKK10.1	serine/threonine protein kinase, FIKK family	9654.46	0.852293	0.156018	5.46277	4.6876e-08	2.38423e-07
PF3D7_1314500		transmembrane emp24 domain-containing protein, putative	2143.02	0.852233	0.215233	3.95958	7.50816e-05	0.00022333
PF3D7_0417500		memo-like protein	18766.1	0.85189	0.138163	6.16583	7.01148e-10	4.75045e-09
PF3D7_0420200	ACPS	holo-[acyl-carrier-protein] synthase, putative	593.609	0.851094	0.210668	4.03999	5.34546e-05	0.00016344
PF3D7_0206900	MSP5	merozoite surface protein 5	15772.1	0.850631	0.121442	7.00445	2.47964e-12	2.38027e-11
PF3D7_1028200		RING zinc finger protein, putative	3520.35	0.84978	0.153614	5.53191	3.16763e-08	1.65506e-07
PF3D7_1365500	GCVT	aminomethyltransferase, mitochondrial, putative	4145.97	0.847144	0.140601	6.02516	1.68938e-09	1.06524e-08
PF3D7_1458700		exonuclease V, mitochondrial, putative	2134.25	0.846993	0.208507	4.06219	4.86148e-05	0.000150356
PF3D7_1001200	ACBP2	acyl-CoA binding protein, isoform 2, ACBP2	6068.82	0.846431	0.152909	5.53554	3.10274e-08	1.6275e-07
PF3D7_0720500		conserved Plasmodium protein, unknown function	3385.65	0.846225	0.150787	5.61207	1.9992e-08	1.08361e-07
PF3D7_1211700	MCM5	DNA replication licensing factor MCM5, putative	14176.6	0.844103	0.160721	5.25199	1.50461e-07	7.1009e-07
PF3D7_1408000	PMII	plasmepsin II	2013.36	0.842714	0.202057	4.17068	3.0369e-05	9.67696e-05
PF3D7_1311900	vapA	V-type proton ATPase catalytic subunit A	3772.96	0.842636	0.229193	3.67654	0.000236419	0.000640395
PF3D7_1243500	SNF7	vacuolar-sorting protein SNF7, putative	4794.1	0.841381	0.13185	6.38134	1.75543e-10	1.28311e-09
PF3D7_0814900	FeSOD	superoxide dismutase [Fe]	8792.22	0.837828	0.140766	5.95191	2.65032e-09	1.61793e-08
PF3D7_1009400	ZNF2	zinc finger protein, putative	2062.98	0.837348	0.167545	4.99775	5.80037e-07	2.49798e-06
PF3D7_1002100	PTP5	EMP1-trafficking protein	8892.26	0.83612	0.139619	5.98857	2.11692e-09	1.31474e-08
PF3D7_1320800		dihydrolipoyllysine-residue succinyltransferase component of 2-oxoglutarate dehydrogenase complex	4045.7	0.835924	0.192981	4.33165	1.47996e-05	5.00724e-05
PF3D7_0213100	SIS1	protein SIS1	5434.43	0.835498	0.176251	4.74037	2.13325e-06	8.31905e-06
PF3D7_1466100	PPKL	protein phosphatase containing kelch-like domains	1053.02	0.835329	0.192392	4.34181	1.41316e-05	4.79633e-05
PF3D7_1214000		conserved protein, unknown function	1293.48	0.835262	0.229676	3.6367	0.000276153	0.000734674
PF3D7_1104800		metabolite/drug transporter, putative	2526.53	0.834981	0.187008	4.46495	8.00873e-06	2.84979e-05
PF3D7_0501600	RAP2	rhoptry-associated protein 2	35039.7	0.834081	0.14777	5.64446	1.657e-08	9.06368e-08
PF3D7_0414900	ARO	armadillo-domain containing rhoptry protein	67480.5	0.833857	0.209157	3.98674	6.69862e-05	0.000201259
PF3D7_0210700	SYN17	syntaxin, Qa-SNARE family	5327.09	0.832632	0.155296	5.36157	8.25035e-08	4.02833e-07
PF3D7_1329300	CAF1B	chromatin assembly factor 1 subunit B, putative	3519.62	0.830452	0.167841	4.94785	7.50385e-07	3.16057e-06
PF3D7_0709700	PARE	prodrug activation and resistance esterase	4786.55	0.829143	0.140654	5.89489	3.74926e-09	2.22304e-08
PF3D7_1326000	C3AP2	respiratory chain complex 3 associated protein 2	9730.63	0.829113	0.147416	5.62433	1.86232e-08	1.01249e-07
PF3D7_1141200		ATP synthase-associated protein, putative	1528.29	0.829086	0.163202	5.08011	3.77215e-07	1.67422e-06
PF3D7_0623000	CS	chorismate synthase	4392.72	0.828594	0.183452	4.51668	6.28171e-06	2.27447e-05
PF3D7_0909800	SNRPD3	small nuclear ribonucleoprotein Sm D3, putative	1613.11	0.826803	0.165737	4.98865	6.08018e-07	2.60802e-06
PF3D7_0821900		WPP motif-containing protein, putative	2148.78	0.826266	0.213888	3.86309	0.000111963	0.000322487
PF3D7_1332600	APN1	DNA-(apurinic or apyrimidinic site) lyase 1	15100.2	0.826024	0.129549	6.37616	1.81583e-10	1.3185e-09
PF3D7_1251100		conserved Plasmodium protein, unknown function	4859.75	0.825673	0.151218	5.46014	4.75748e-08	2.41637e-07
PF3D7_0935800	CLAG9	cytoadherence linked asexual protein 9	41175.9	0.825664	0.152002	5.43192	5.57506e-08	2.79326e-07
PF3D7_0627700		transportin	5800	0.82522	0.198523	4.1568	3.22742e-05	0.000102597
PF3D7_1108400	CK2alpha	casein kinase 2, alpha subunit	24090.6	0.824388	0.133247	6.18694	6.13431e-10	4.20392e-09
PF3D7_1471200	SulP	inorganic anion exchanger, inorganic anion antiporter	10592.3	0.824179	0.148093	5.56529	2.61714e-08	1.38634e-07
PF3D7_1105700	RTCB	tRNA-splicing ligase RtcB, putative	5879.19	0.823705	0.139427	5.90777	3.46777e-09	2.07448e-08
PF3D7_0523900		MerC domain-containing protein, putative	756.22	0.82274	0.200072	4.11223	3.9186e-05	0.000122966
PF3D7_1202200	PIC	mitochondrial phosphate carrier protein	6365.9	0.822734	0.133088	6.18186	6.33494e-10	4.33588e-09
PF3D7_1105000	H4	histone H4	103061	0.819444	0.22062	3.71428	0.000203787	0.000559059
PF3D7_1200100	VAR	erythrocyte membrane protein 1, PfEMP1	11609.6	0.817673	0.14167	5.77168	7.84846e-09	4.46132e-08
PF3D7_0422800	SR12	serpentine receptor 12, putative	1596.34	0.817559	0.193646	4.22193	2.42216e-05	7.87716e-05
PF3D7_0615000		conserved Plasmodium protein, unknown function	1427.95	0.817383	0.154321	5.29664	1.17953e-07	5.62608e-07
PF3D7_1401100		DnaJ protein, putative	20440.9	0.817267	0.166632	4.90462	9.36106e-07	3.89391e-06
PF3D7_0709800		conserved protein, unknown function	572.905	0.816774	0.238012	3.43166	0.000599905	0.00149447
PF3D7_1421900	CTR2	copper transporter, putative	7960.24	0.8164	0.129166	6.32054	2.60651e-10	1.85498e-09
PF3D7_1035900	MAAP	merozoites-associated armadillo repeats protein	3761.93	0.814337	0.225773	3.60689	0.000309889	0.000817535
PF3D7_0833500	VAR	erythrocyte membrane protein 1, PfEMP1	1076.75	0.813549	0.176544	4.60819	4.06194e-06	1.51049e-05
PF3D7_1213200	MED18	mediator of RNA polymerase II transcription subunit 18, putative	1683.74	0.812809	0.157936	5.14645	2.65465e-07	1.21027e-06
PF3D7_1137800	SPELD	sporozoite surface protein essential for liver stage development, putative	741.167	0.812546	0.213975	3.79739	0.000146229	0.000412331
PF3D7_0413500	PGM2	phosphoglucomutase-2	8678.06	0.811558	0.132383	6.13037	8.76738e-10	5.86605e-09
PF3D7_0627300	RNF5	E3 ubiquitin-protein ligase RNF5, putative	13779.5	0.811413	0.158835	5.10854	3.24652e-07	1.4627e-06
PF3D7_0827300		conserved Plasmodium protein, unknown function	3226.83	0.810464	0.162541	4.9862	6.15777e-07	2.63708e-06
PF3D7_0214000	CCT8	T-complex protein 1 subunit theta	9617.39	0.809877	0.141683	5.71613	1.08979e-08	6.07248e-08
PF3D7_1321800		protein transport protein SFT2, putative	3813.8	0.806378	0.135158	5.96619	2.42863e-09	1.48937e-08
PF3D7_0312500	MFR3	multidrug-resistant modulator MFR3	661.081	0.80592	0.220792	3.65013	0.000262113	0.000701844
PF3D7_0722400	OLA1	Obg-like ATPase 1, putative	12012.3	0.805104	0.153671	5.23915	1.61317e-07	7.57328e-07
PF3D7_1402000		conserved Plasmodium protein, unknown function	3506.29	0.804787	0.153883	5.22986	1.69642e-07	7.92253e-07
PF3D7_0707900		ribosomal protein S8e, putative	2374.9	0.804053	0.180072	4.46517	8.0004e-06	2.84872e-05
PF3D7_1360200	EMC3	ER membrane protein complex subunit 3, putative	2036.13	0.804013	0.162647	4.94331	7.68054e-07	3.23245e-06
PF3D7_1341600	GPI10	GPI mannosyltransferase 3	789.405	0.803474	0.218176	3.68268	0.000230792	0.00062737
PF3D7_0931300		conserved Plasmodium protein, unknown function	190.02	0.802855	0.308552	2.60201	0.00926794	0.0178442
PF3D7_1368000		conserved protein, unknown function	615.679	0.802584	0.207732	3.86356	0.000111744	0.000322203
PF3D7_0621400	ALV7	Pf77 protein	1352.79	0.802451	0.253459	3.166	0.00154551	0.00350665
PF3D7_0418400		LSM domain-containing protein, putative	808.592	0.801083	0.190786	4.19885	2.6827e-05	8.64067e-05
PF3D7_1339300		conserved protein, unknown function	11764.6	0.800084	0.18202	4.39559	1.10472e-05	3.84181e-05
PF3D7_1213600	DLC8	dynein light chain 1, putative	4365.66	0.799519	0.141516	5.64966	1.60762e-08	8.80254e-08
PF3D7_0312800		60S ribosomal protein L26, putative	47729.1	0.796498	0.128934	6.17758	6.50924e-10	4.4495e-09
PF3D7_1149300	FIKK11	serine/threonine protein kinase, FIKK family	586.023	0.7928	0.185406	4.27602	1.90262e-05	6.30994e-05
PF3D7_1243600		translation initiation factor SUI1, putative	19792.9	0.792729	0.142768	5.55255	2.81526e-08	1.48542e-07
PF3D7_1479000	ACS1a	acyl-CoA synthetase	836.128	0.792371	0.214331	3.69695	0.000218209	0.000595581
PF3D7_0828900		conserved protein, unknown function	5375.84	0.791381	0.181163	4.36833	1.25198e-05	4.31202e-05
PF3D7_1102800	ETRAMP11.2	early transcribed membrane protein 11.2	308134	0.791297	0.121189	6.52947	6.60031e-11	5.15535e-10
PF3D7_0824700	LMF1	lipase maturation factor, putative	2379.38	0.790322	0.144645	5.46386	4.65887e-08	2.37317e-07
PF3D7_0616000	PDXK	pyridoxal kinase	815.685	0.789786	0.199354	3.96173	7.44098e-05	0.000221578
PF3D7_0921000.2		ubiquitin-conjugating enzyme E2, putative	5798.68	0.789467	0.180866	4.36494	1.27159e-05	4.35999e-05
PF3D7_1007700	AP2-I	AP2 domain transcription factor AP2-I	8902.78	0.788779	0.206883	3.81267	0.000137471	0.000390095
PF3D7_0911500.2		conserved Plasmodium protein, unknown function	190.797	0.788136	0.288056	2.73605	0.00621823	0.012497
PF3D7_1106000	RUVB2	RuvB-like helicase 2	4847.97	0.78744	0.145341	5.41789	6.0306e-08	3.00745e-07
PF3D7_0419100		conserved Plasmodium protein, unknown function	469.648	0.787082	0.212573	3.70264	0.000213366	0.00058355
PF3D7_1038900		esterase, putative	258.435	0.785189	0.309005	2.54102	0.0110529	0.0209353
PF3D7_1336900	cTrpRS	tryptophan--tRNA ligase	3460.86	0.785125	0.240451	3.26521	0.00109381	0.00257769
PF3D7_1116600	STT3	dolichyl-diphosphooligosaccharide--protein glycosyltransferase subunit STT3, putative	4064.01	0.784599	0.178417	4.39756	1.09473e-05	3.80955e-05
PF3D7_0626700		ATPase	4218	0.78407	0.171169	4.58067	4.63478e-06	1.70929e-05
PF3D7_0423100		AP-4 complex subunit sigma, putative	4296.74	0.78404	0.142031	5.5202	3.38614e-08	1.75217e-07
PF3D7_0922300		conserved protein, unknown function	345.015	0.783207	0.243307	3.21901	0.00128633	0.00297136
PF3D7_0816000	RRB1	ribosome assembly protein RRB1, putative	1988.16	0.78272	0.16186	4.83579	1.32621e-06	5.39125e-06
PF3D7_1418800		signal recognition particle RNA	200.935	0.781522	0.285638	2.73606	0.00621803	0.012497
PF3D7_1456600		ribosomal protein L28, mitochondrial, putative	577.557	0.781145	0.194123	4.02398	5.72234e-05	0.000174466
PF3D7_0209100	PATPL1	patatin-like phospholipase 1	3125.44	0.780645	0.157663	4.95135	7.3702e-07	3.10916e-06
PF3D7_1033700	BDP1	bromodomain protein 1	6916.74	0.779646	0.128241	6.07953	1.20536e-09	7.83997e-09
PF3D7_0529300	TIC22	apicoplast TIC22 protein	502.42	0.778959	0.221144	3.52241	0.000427642	0.00109796
PF3D7_1206000	SHLP2	shewanella-like protein phosphatase 2	10787.4	0.778824	0.144048	5.40671	6.4192e-08	3.18139e-07
PF3D7_0722000		conserved Plasmodium protein, unknown function	6003.56	0.775884	0.14682	5.2846	1.25983e-07	5.99311e-07
PF3D7_1318800	SEC63	translocation protein SEC63, putative	25663	0.775878	0.126203	6.14784	7.85451e-10	5.28161e-09
PF3D7_1345900	SPC25	kinetochore protein SPC25, putative	7520.22	0.77569	0.138006	5.6207	1.9018e-08	1.03186e-07
PF3D7_1429300		CPW-WPC family protein	978.493	0.77426	0.189628	4.08305	4.44492e-05	0.000138189
PF3D7_0907500		conserved protein, unknown function	5752.64	0.773852	0.161818	4.78222	1.73369e-06	6.8809e-06
PF3D7_1348600		conserved Plasmodium protein, unknown function	10516	0.773357	0.154397	5.0089	5.47421e-07	2.3613e-06
PF3D7_1129200	RPN7	26S proteasome regulatory subunit RPN7, putative	17393.5	0.772466	0.141174	5.47171	4.45707e-08	2.27778e-07
PF3D7_1344400		conserved Plasmodium protein, unknown function	912.738	0.77245	0.256816	3.0078	0.00263151	0.00570993
PF3D7_0206200	PAT	pantothenate transporter	11478.3	0.772264	0.144711	5.33659	9.47087e-08	4.57432e-07
PF3D7_1018500	RDS3	pre-mRNA-splicing factor RDS3, putative	4769.03	0.772044	0.147808	5.22327	1.7579e-07	8.18116e-07
PF3D7_1025700		conserved protein, unknown function	3718.75	0.77151	0.145979	5.28507	1.25654e-07	5.98277e-07
PF3D7_0202500	ETRAMP2	early transcribed membrane protein 2	146771	0.770887	0.128646	5.99232	2.06874e-09	1.2878e-08
PF3D7_0918500	TR	telomerase RNA	14085.4	0.770533	0.190943	4.03541	5.45078e-05	0.000166438
PF3D7_0829800		non-coding RNA	907.696	0.770331	0.283699	2.71531	0.00662134	0.0132526
PF3D7_1322800	C2AP2	respiratory chain complex 2 associated protein 2	507.579	0.769927	0.262026	2.93836	0.00329957	0.00701208
PF3D7_1024300	ATPTG10	ATP synthase-associated protein, putative	8686.79	0.769887	0.17312	4.44713	8.70266e-06	3.07632e-05
PF3D7_0908700		tRNA pseudouridine synthase, putative	1666.82	0.769085	0.179795	4.27756	1.88949e-05	6.27414e-05
PF3D7_1011400		proteasome subunit beta type-5	2850.69	0.768622	0.150093	5.12098	3.03957e-07	1.37292e-06
PF3D7_0504500		MOLO1 domain-containing protein, putative	367.731	0.765593	0.224236	3.41424	0.000639613	0.00158456
PF3D7_0516500	MFS1	major facilitator superfamily domain-containing protein, putative	1200.49	0.764549	0.164329	4.65256	3.2784e-06	1.23365e-05
PF3D7_1369000	GPAA1	glycosylphosphatidylinositol anchor attachment 1 protein, putative	3265.25	0.763926	0.177435	4.30538	1.66698e-05	5.58016e-05
PF3D7_1116900		conserved protein, unknown function	499.866	0.760963	0.268213	2.83716	0.0045517	0.00939762
PF3D7_1036300	DBLMSP2	duffy binding-like merozoite surface protein 2	927.349	0.760656	0.201789	3.76957	0.000163528	0.000457266
PF3D7_0726200	FIKK7.1	serine/threonine protein kinase, FIKK family	671.832	0.759787	0.244183	3.11156	0.00186105	0.00415407
PF3D7_0301700		Plasmodium exported protein, unknown function	9280.29	0.758313	0.133909	5.6629	1.48837e-08	8.19977e-08
PF3D7_0716800	EIF3I	eukaryotic translation initiation factor 3 subunit I, putative	15295.7	0.758259	0.168756	4.49324	7.01479e-06	2.51782e-05
PF3D7_1409900	CDS	cytidine diphosphate-diacylglycerol synthase	9406.25	0.758091	0.147688	5.13307	2.85052e-07	1.29516e-06
PF3D7_1140400		conserved Plasmodium protein, unknown function	18048.3	0.753707	0.145657	5.17455	2.28458e-07	1.04868e-06
PF3D7_0301800		Plasmodium exported protein, unknown function	16147.7	0.752652	0.155464	4.84133	1.28974e-06	5.25893e-06
PF3D7_0819600		ubiquitin-like protein, putative	28395.2	0.750541	0.150961	4.97176	6.63464e-07	2.82104e-06
PF3D7_1473600		conserved Plasmodium protein, unknown function	384.201	0.749777	0.306217	2.44852	0.0143446	0.0263246
PF3D7_1309900		succinate dehydrogenase assembly factor 2, putative	285.958	0.749497	0.276568	2.70999	0.00672853	0.013432
PF3D7_1459800		bax inhibitor 1, putative	12259.5	0.748601	0.124214	6.02673	1.67312e-09	1.05748e-08
PF3D7_1222100		conserved Plasmodium protein, unknown function	2064.92	0.747979	0.192156	3.89255	9.91957e-05	0.000288188
PF3D7_1362300	TMCO1	transmembrane and coiled-coil domain-containing protein 1, putative	701.178	0.747043	0.2016	3.70556	0.00021092	0.000577153
PF3D7_0625000	SMS1	sphingomyelin synthase 1, putative	2585.43	0.746786	0.16053	4.65201	3.28709e-06	1.23605e-05
PF3D7_0216200		Alba domain-containing protein, putative	1731.71	0.745758	0.153384	4.86202	1.16193e-06	4.75949e-06
PF3D7_0825400	ATPTG15	ATP synthase-associated protein, putative	788.63	0.745715	0.197072	3.78398	0.000154342	0.000433839
PF3D7_1136500	CK1	casein kinase 1	56202.5	0.745157	0.153797	4.84506	1.26576e-06	5.16898e-06
PF3D7_0604900		conserved Plasmodium protein, unknown function	2221.22	0.745052	0.192778	3.86481	0.000111174	0.000320732
PF3D7_1019400		60S ribosomal protein L30e, putative	5578.94	0.743942	0.204427	3.63915	0.000273536	0.000728435
PF3D7_1001300		Plasmodium exported protein (PHISTa), unknown function	657.791	0.743107	0.24051	3.08971	0.0020035	0.00444799
PF3D7_0810700		conserved Plasmodium protein, unknown function	749.369	0.742671	0.190825	3.89189	9.94677e-05	0.000288666
PF3D7_0806900		V-type proton ATPase subunit a, putative	588.626	0.74258	0.189057	3.92782	8.57194e-05	0.000251763
PF3D7_1014700	PHB2	prohibitin 2, putative	3051.2	0.742146	0.18589	3.99239	6.54108e-05	0.000196856
PF3D7_0515200		conserved Plasmodium protein, unknown function	384.931	0.742054	0.232275	3.19473	0.00139963	0.00320274
PF3D7_1342400	CK2beta2	casein kinase II beta chain	5712.67	0.738411	0.172168	4.2889	1.79564e-05	5.99217e-05
PF3D7_1028300	EBP2	rRNA-processing protein EBP2, putative	2225	0.738272	0.150185	4.91573	8.84502e-07	3.69644e-06
PF3D7_1440300	PBGS	porphobilinogen synthase	1379.56	0.737599	0.185946	3.96674	7.28634e-05	0.000217698
PF3D7_0315400		conserved Plasmodium protein, unknown function	4122.69	0.735001	0.215977	3.40315	0.000666142	0.00164195
PF3D7_1339900	ABCB5	ABC transporter B family member 5, putative	4048.19	0.734949	0.210021	3.49941	0.000466296	0.00118867
PF3D7_1441600		acid cluster protein 33 homologue, putative	850.564	0.734572	0.202775	3.6226	0.000291658	0.000773623
PF3D7_1127400		conserved Plasmodium protein, unknown function	829.313	0.734378	0.199855	3.67455	0.000238268	0.000644429
PF3D7_0829700		non-coding RNA	474.754	0.733917	0.22456	3.26824	0.00108219	0.00255697
PF3D7_0107500	NCR1	Niemann-Pick type C1-related protein	15250.9	0.733239	0.134091	5.46822	4.54581e-08	2.32092e-07
PF3D7_1235200	VP2	V-type K+-independent H+-translocating inorganic pyrophosphatase	2398.03	0.733052	0.177655	4.12628	3.68686e-05	0.000116238
PF3D7_0416000		RNA-binding protein, putative	9205.59	0.732141	0.151489	4.83297	1.34508e-06	5.45554e-06
PF3D7_1250300	VPS26	vacuolar protein sorting-associated protein 26, putative	4602.51	0.73113	0.18221	4.01256	6.00646e-05	0.000182507
PF3D7_1361500.2		PH domain-containing protein, putative	1630.58	0.727634	0.183979	3.95499	7.65383e-05	0.000227034
PF3D7_1412000		p1/s1 nuclease, putative	1333.66	0.727411	0.212468	3.42362	0.000617922	0.00153508
PF3D7_1329400	AMPD	AMP deaminase	2565.46	0.726049	0.160829	4.51442	6.34893e-06	2.29417e-05
PF3D7_0821200		conserved protein, unknown function	2026.4	0.725677	0.151815	4.77999	1.75301e-06	6.94729e-06
PF3D7_1428600	RF1	peptide chain release factor 1	3863.98	0.725618	0.165669	4.37993	1.18719e-05	4.10203e-05
PF3D7_1424100	RPL5	60S ribosomal protein L5, putative	59400.3	0.725211	0.13483	5.37871	7.50205e-08	3.68307e-07
PF3D7_1004500		conserved Plasmodium protein, unknown function	4840.56	0.725072	0.174409	4.15731	3.2202e-05	0.000102428
PF3D7_0909300	ARP	apoptosis-related protein	6306.15	0.724652	0.150679	4.80923	1.51511e-06	6.06271e-06
PF3D7_1006400		heptatricopeptide repeat-containing protein, putative	488.15	0.723918	0.238645	3.03345	0.00241774	0.00528455
PF3D7_1032500	Der1-2	DER1-like protein, putative	3079.46	0.723404	0.169106	4.27783	1.88727e-05	6.27064e-05
PF3D7_1341900		V-type proton ATPase subunit D, putative	11335.5	0.722871	0.155694	4.64289	3.43574e-06	1.28924e-05
PF3D7_1345700	IDH	isocitrate dehydrogenase [NADP], mitochondrial	11604.6	0.721879	0.145013	4.97802	6.42396e-07	2.74232e-06
PF3D7_0505800	SUMO	small ubiquitin-related modifier	42193	0.721437	0.153924	4.68697	2.77275e-06	1.05597e-05
PF3D7_1447400		conserved Plasmodium protein, unknown function	2110.19	0.72041	0.19076	3.77652	0.000159033	0.000445624
PF3D7_1457500	VPS4	vacuolar protein sorting-associated protein 4	4648.2	0.720398	0.140603	5.12364	2.99688e-07	1.35821e-06
PF3D7_0307400	ClpP	ATP-dependent Clp protease proteolytic subunit	4574.2	0.719267	0.133412	5.39131	6.99442e-08	3.44964e-07
PF3D7_0907700	PA28	proteasome activator 28	18467.3	0.719171	0.141408	5.08578	3.66112e-07	1.63305e-06
PF3D7_0719200	NEK4	NIMA related kinase 4	236.015	0.718636	0.283752	2.53262	0.0113214	0.0213835
PF3D7_1142600		60S ribosomal protein L35ae, putative	35425.3	0.716678	0.131284	5.45901	4.78806e-08	2.42843e-07
PF3D7_1109400		small nucleolar RNA snR61/Z1/Z11	13569.3	0.715935	0.124733	5.73975	9.48155e-09	5.34433e-08
PF3D7_1309600		ribosomal RNA methyltransferase, putative	1039.84	0.715458	0.223575	3.20008	0.00137391	0.00315328
PF3D7_0624500	APC11	anaphase-promoting complex subunit 11, putative	10684.1	0.715385	0.150511	4.75303	2.00392e-06	7.86614e-06
PF3D7_1345300	ApiCOX16	cytochrome c oxidase subunit ApiCOX16, putative	3794.36	0.714327	0.136567	5.23058	1.68975e-07	7.89825e-07
PF3D7_0616800	MQO	malate:quinone oxidoreductase	3185.11	0.713916	0.178652	3.99612	6.43894e-05	0.000194327
PF3D7_0720600		conserved protein, unknown function	8552.68	0.712934	0.130237	5.47414	4.39641e-08	2.24892e-07
PF3D7_1247000.2		F-box only protein 9 homolog, putative	449.378	0.712296	0.216615	3.28831	0.00100792	0.00240164
PF3D7_1115100		conserved protein, unknown function	798.92	0.711994	0.20871	3.4114	0.000646313	0.00159968
PF3D7_0505500	MSH6	DNA mismatch repair protein MSH6, putative	5973.6	0.711562	0.193378	3.67964	0.000233565	0.000633944
PF3D7_1466700	NIP7	60S ribosome subunit biogenesis protein NIP7, putative	1903.87	0.710742	0.16329	4.35263	1.34512e-05	4.58279e-05
PF3D7_1134100	PDI-11	protein disulfide-isomerase, putative	4014.12	0.709386	0.190343	3.72688	0.000193862	0.000532649
PF3D7_1026100		conserved Plasmodium protein, unknown function	183.435	0.708231	0.313126	2.26181	0.0237094	0.0413604
PF3D7_0808800	RIF	rifin	205.564	0.708005	0.268849	2.63347	0.00845183	0.016438
PF3D7_0502700		conserved protein, unknown function	254.261	0.707091	0.291791	2.42328	0.0153813	0.0280189
PF3D7_1139700		adrenodoxin reductase, putative	4684.51	0.706857	0.130645	5.41053	6.28379e-08	3.12495e-07
PF3D7_0934700		UBX domain-containing protein, putative	17900.9	0.706759	0.146348	4.82929	1.37021e-06	5.54911e-06
PF3D7_0518000		NOSIP domain-containing protein, putative	1929.63	0.706384	0.16298	4.33418	1.46304e-05	4.95935e-05
PF3D7_0210000	Sec61-gamma	secretory complex protein 61 gamma subunit	11255.1	0.706371	0.126693	5.57547	2.46864e-08	1.31286e-07
PF3D7_1339500		ribosomal protein L49, mitochondrial, putative	494.036	0.706359	0.241016	2.93075	0.00338141	0.00717464
PF3D7_0929400	RhopH2	high molecular weight rhoptry protein 2	93731.8	0.706247	0.1678	4.20886	2.56657e-05	8.30151e-05
PF3D7_0806800		V-type proton ATPase subunit a, putative	24638.4	0.705003	0.124923	5.6435	1.66626e-08	9.10504e-08
PF3D7_1010700		dolichyl-phosphate-mannose--protein mannosyltransferase, putative	15693.3	0.703259	0.137079	5.13033	2.89239e-07	1.31308e-06
PF3D7_1247000	FBXO9	F-box only protein 9 homolog, putative	1094.66	0.702768	0.17898	3.92652	8.6183e-05	0.000252848
PF3D7_0320700	SPC25	signal peptidase complex subunit 2	13581	0.701108	0.199797	3.5091	0.00044963	0.00114946
PF3D7_1463600		conserved Plasmodium protein, unknown function	1866.91	0.700909	0.17002	4.12251	3.74772e-05	0.000118018
PF3D7_0929600		G2 protein, putative	1700.4	0.699268	0.179231	3.90149	9.56017e-05	0.000278199
PF3D7_0207000	MSP4	merozoite surface protein 4	58985.5	0.699109	0.137582	5.08139	3.74685e-07	1.66437e-06
PF3D7_0317000		proteasome subunit alpha type-3, putative	16557.4	0.698408	0.138071	5.05833	4.22936e-07	1.86328e-06
PF3D7_0931800		proteasome subunit beta type-6, putative	17777.3	0.698135	0.13995	4.98845	6.08654e-07	2.60866e-06
PF3D7_1421000	DIX	DIX domain-containing protein, putative	1585.4	0.697772	0.195802	3.56366	0.00036572	0.00095311
PF3D7_0507900		conserved Plasmodium protein, unknown function	2512.08	0.697503	0.181082	3.85187	0.000117221	0.000336727
PF3D7_0723500		dynactin subunit 5, putative	191.291	0.696485	0.308773	2.25566	0.0240922	0.0419599
PF3D7_0800750		Plasmodium exported protein, unknown function, pseudogene	439.398	0.695494	0.246315	2.8236	0.0047488	0.00977073
PF3D7_1126400	MED21	mediator of RNA polymerase II transcription subunit 21, putative	2681.41	0.695433	0.170579	4.07689	4.56419e-05	0.000141733
PF3D7_0937800	VAR	erythrocyte membrane protein 1, PfEMP1	1519.32	0.694781	0.179088	3.87955	0.000104651	0.000302562
PF3D7_0702200	LPL20	lysophospholipase LPL20	8494.64	0.694303	0.156462	4.43751	9.10066e-06	3.20644e-05
PF3D7_0718400		ribosomal protein S8, mitochondrial, putative	11629.4	0.69427	0.138435	5.01512	5.30015e-07	2.29175e-06
PF3D7_1126200	RPS18	40S ribosomal protein S18, putative	38042	0.693013	0.143523	4.82857	1.37515e-06	5.5607e-06
PF3D7_0423800	CyRPA	cysteine-rich protective antigen	20313.5	0.692596	0.146178	4.73802	2.15815e-06	8.40393e-06
PF3D7_0319100	RBX1	E3 ubiquitin-protein ligase RBX1, putative	7561.34	0.691884	0.182978	3.78123	0.000156053	0.000437503
PF3D7_0717700		serine--tRNA ligase, putative	19861.9	0.691575	0.136035	5.0838	3.69959e-07	1.64747e-06
PF3D7_0509700		conserved Plasmodium protein, unknown function	571.314	0.69117	0.198515	3.4817	0.000498235	0.00126229
PF3D7_1444700		shikimate dehydrogenase, putative	2488.65	0.689601	0.169312	4.07297	4.64181e-05	0.000143977
PF3D7_0204500	AspAT	aspartate transaminase	2183.48	0.688527	0.19572	3.51791	0.000434955	0.00111566
PF3D7_1246500		methyltransferase, putative	782.899	0.687981	0.197738	3.47926	0.0005028	0.00127145
PF3D7_1422200		conserved Plasmodium protein, unknown function	1777.41	0.687413	0.178094	3.85984	0.000113461	0.00032645
PF3D7_1304900	RPB11	DNA-directed RNA polymerase II subunit RPB11, putative	2171.39	0.686532	0.169868	4.04157	5.30954e-05	0.000162524
PF3D7_0210300		monocarboxylate transporter, putative	3603.75	0.684046	0.135153	5.06128	4.16444e-07	1.84072e-06
PF3D7_0907000		conserved Plasmodium protein, unknown function	2176.4	0.683863	0.167564	4.08121	4.48027e-05	0.000139208
PF3D7_1454100		tRNA intron endonuclease, putative	1479.29	0.683677	0.176656	3.8701	0.000108792	0.000314197
PF3D7_0807500		proteasome subunit alpha type-6, putative	27800.5	0.683672	0.130815	5.22623	1.72999e-07	8.07229e-07
PF3D7_0408000		conserved Plasmodium protein, unknown function	7366.64	0.68231	0.174976	3.89946	9.64086e-05	0.000280395
PF3D7_0319900		conserved protein, unknown function	281.92	0.682289	0.265539	2.56945	0.0101861	0.0194757
PF3D7_0706700	MSH2-2	DNA mismatch repair protein MSH2, putative	320.2	0.678931	0.254681	2.66581	0.00768021	0.0151126
PF3D7_0529900		RING zinc finger protein, putative	9522.38	0.677307	0.135988	4.98063	6.33777e-07	2.70768e-06
PF3D7_1005700		peptidase, putative	255.611	0.676884	0.300587	2.25188	0.0243301	0.042332
PF3D7_1472000	ISY1	pre-mRNA-splicing factor ISY1, putative	1838.87	0.676651	0.203949	3.31775	0.00090745	0.00217286
PF3D7_1133800		RNA (uracil-5-)methyltransferase, putative	8484.25	0.675844	0.170644	3.96054	7.47803e-05	0.000222558
PF3D7_1409300	DDI1	DNA damage-inducible protein 1	11201.7	0.675461	0.136047	4.96489	6.8739e-07	2.91353e-06
PF3D7_1130400	RPT5	26S protease regulatory subunit 6A, putative	16605.5	0.674825	0.132216	5.10397	3.326e-07	1.49726e-06
PF3D7_0715500		ATP synthase subunit epsilon, mitochondrial, putative	1137.12	0.674418	0.183748	3.67033	0.000242234	0.000653179
PF3D7_1021300		apicoplast integral membrane protein, putative	754.853	0.673742	0.208769	3.22721	0.00125005	0.00290004
PF3D7_1236200		conserved Plasmodium protein, unknown function	2333.48	0.673604	0.14323	4.70295	2.56435e-06	9.82178e-06
PF3D7_0715600		GTP-binding translation elongation factor tu family protein, putative	7668.51	0.673326	0.14159	4.75545	1.98002e-06	7.77802e-06
PF3D7_0507400	SUB1-ProM	subtilisin propeptide-like protein	3988.94	0.672469	0.156553	4.29546	1.74328e-05	5.82469e-05
PF3D7_0914700	MFR4	major facilitator superfamily-related transporter, putative	2491.36	0.67227	0.234575	2.86591	0.00415816	0.00865505
PF3D7_0506400		conserved Plasmodium protein, unknown function	512.33	0.672089	0.233295	2.88086	0.00396591	0.00829671
PF3D7_1128700	GPI8	GPI-anchor transamidase, putative	3316.87	0.671456	0.177164	3.79003	0.000150627	0.000423841
PF3D7_1118800	ARC40	actin-related protein 2/3 complex subunit 1, putative	413.713	0.671119	0.276186	2.42995	0.0151008	0.0275709
PF3D7_0923500		cyclin-dependent kinases regulatory subunit, putative	2325.36	0.671103	0.18456	3.63623	0.000276662	0.000735663
PF3D7_0903100	RER1	protein RER1, putative	3362.52	0.669825	0.167055	4.0096	6.08219e-05	0.000184494
PF3D7_0936000	REX2	ring-exported protein 2	5312.55	0.669587	0.155453	4.30732	1.65241e-05	5.53998e-05
PF3D7_1145300	CRIPT	cysteine-rich PDZ-binding protein, putative	2664.61	0.669047	0.186608	3.58532	0.000336671	0.000882116
PF3D7_1001800		Plasmodium exported protein (PHISTc), unknown function	4552.84	0.668961	0.168726	3.96478	7.34644e-05	0.000219127
PF3D7_1118000		conserved Plasmodium protein, unknown function	2126.09	0.668281	0.142451	4.69131	2.71459e-06	1.03529e-05
PF3D7_1412300	NTF2	nuclear transport factor 2, putative	20110.5	0.667575	0.177766	3.75536	0.000173096	0.000481011
PF3D7_0310000		50S ribosomal protein L9, apicoplast, putative	2166.29	0.666806	0.15234	4.3771	1.20267e-05	4.15017e-05
PF3D7_0727200	NFS1	cysteine desulfurase IscS	1196.13	0.665522	0.206358	3.22509	0.00125933	0.00291778
PF3D7_0213400		conserved protein, unknown function	4400.4	0.665352	0.167412	3.97433	7.0577e-05	0.000211102
PF3D7_0905000	ATPTG4	ATP synthase-associated protein, putative	721.308	0.664534	0.214933	3.09181	0.00198937	0.00442028
PF3D7_1361700	COX2A	cytochrome c oxidase subunit 2A, putative	3241.65	0.664467	0.157199	4.22691	2.36925e-05	7.70977e-05
PF3D7_1134000	HSP70-3	heat shock protein 70	20502.3	0.66394	0.160596	4.13422	3.56168e-05	0.000112556
PF3D7_1406000	RBM8A	RNA-binding protein 8A, putative	2959.65	0.663286	0.158815	4.17647	2.96068e-05	9.45655e-05
PF3D7_0308200	CCT7	T-complex protein 1 subunit eta	12892.7	0.662239	0.12776	5.18345	2.17821e-07	1.00415e-06
PF3D7_1301900		Plasmodium exported protein, unknown function	353.614	0.660877	0.242452	2.72581	0.0064144	0.0128719
PF3D7_0913400		elongation factor, putative	732.434	0.660186	0.191782	3.44238	0.000576617	0.00144114
PF3D7_1105300		conserved Plasmodium protein, unknown function	2587.94	0.659937	0.177725	3.71324	0.000204622	0.000560777
PF3D7_1236300		conserved protein, unknown function	1622.35	0.659508	0.19247	3.42656	0.000611285	0.00152
PF3D7_1239600	ThzK	hydroxyethylthiazole kinase	1946.52	0.65814	0.147732	4.45496	8.39093e-06	2.97592e-05
PF3D7_1310700	PIC5	PhIL1-interacting candidate PIC5	74764.7	0.658043	0.164481	4.00074	6.3146e-05	0.000190789
PF3D7_0527200	USP14	ubiquitin carboxyl-terminal hydrolase 14	26589.6	0.655843	0.124624	5.26259	1.42039e-07	6.73303e-07
PF3D7_0705400	MCM7	DNA replication licensing factor MCM7	18346.3	0.654191	0.13174	4.96577	6.843e-07	2.90503e-06
PF3D7_1133000		conserved Plasmodium protein, unknown function	523.291	0.65267	0.213076	3.06309	0.00219061	0.00482744
PF3D7_0528100		AP-1/2 complex subunit beta, putative	9068.2	0.650595	0.159808	4.0711	4.67914e-05	0.000145051
PF3D7_0625400		conserved Plasmodium protein, unknown function	5024.52	0.650559	0.135441	4.80326	1.561e-06	6.22776e-06
PF3D7_0823700	TOM7	mitochondrial import receptor subunit TOM7, putative	4210.47	0.649745	0.169547	3.83223	0.000126985	0.000362642
PF3D7_0730800		Plasmodium exported protein, unknown function	19650.9	0.649723	0.121903	5.32982	9.83086e-08	4.73116e-07
PF3D7_0917800		conserved Plasmodium protein, unknown function	771.265	0.649276	0.181412	3.57901	0.000344903	0.000901925
PF3D7_0102700	MaTrA	merozoite-associated tryptophan-rich antigen	2326.79	0.648568	0.149926	4.32593	1.51889e-05	5.1228e-05
PF3D7_1465900		40S ribosomal protein S3	35746.7	0.648122	0.158245	4.09569	4.20911e-05	0.000131315
PF3D7_1467500		DNA/RNA-binding protein KIN17, putative	2832.22	0.647828	0.170013	3.81046	0.000138707	0.000393395
PF3D7_1307500		conserved Plasmodium protein, unknown function	3885.21	0.647667	0.150418	4.30577	1.66405e-05	5.57385e-05
PF3D7_1434800		mitochondrial acidic protein MAM33, putative	8541.39	0.647106	0.139264	4.6466	3.37444e-06	1.26713e-05
PF3D7_1144600	TFG2	transcription initiation factor IIF subunit beta, putative	2385.42	0.645495	0.172355	3.74514	0.00018029	0.000498935
PF3D7_0110800		transcription initiation factor TFIIB, putative	4636.35	0.644818	0.150356	4.2886	1.79801e-05	5.99633e-05
PF3D7_1315400		zinc finger (CCCH type) protein, putative	16310.7	0.643803	0.145135	4.43588	9.16959e-06	3.22861e-05
PF3D7_1134400		WPP motif-containing protein, putative	2241.39	0.64354	0.159361	4.03826	5.38488e-05	0.000164552
PF3D7_0515600	GEP	gamete egress protein GEP, putative	374.288	0.642015	0.23783	2.69947	0.00694507	0.0138027
PF3D7_1128600	NOT2	CCR4-NOT transcription complex subunit 2, putative	278.405	0.641595	0.272283	2.35635	0.0184556	0.033033
PF3D7_1317500		conserved protein, unknown function	489.998	0.641053	0.215027	2.98127	0.00287054	0.00616874
PF3D7_1023100		dynein heavy chain, putative	262.642	0.640933	0.263104	2.43604	0.014849	0.0271666
PF3D7_0810000		acyl-CoA binding protein, putative	3568	0.640909	0.141495	4.52957	5.9105e-06	2.14441e-05
PF3D7_1405700		RING zinc finger protein, putative	2146.56	0.640426	0.175452	3.65015	0.000262086	0.000701844
PF3D7_1410800		ankyrin-repeat protein, putative	6835.48	0.640409	0.156522	4.09151	4.28581e-05	0.000133419
PF3D7_0905700.2		autophagy-related protein 3, putative	4186.31	0.640275	0.163535	3.91522	9.03216e-05	0.000263979
PF3D7_1124400	LSM1	U6 snRNA-associated Sm-like protein LSm1, putative	2169.39	0.639709	0.205485	3.11316	0.00185093	0.00413493
PF3D7_0530800		CPW-WPC family protein	761.673	0.638182	0.189833	3.36182	0.000774312	0.00188519
PF3D7_0629600		ribosomal RNA-processing protein 7, putative	4406.32	0.637457	0.135209	4.71462	2.42168e-06	9.342e-06
PF3D7_0517900		zinc finger protein, putative	6181.04	0.6366	0.14142	4.50148	6.74806e-06	2.42695e-05
PF3D7_1014400	MRK	MO15-related protein kinase	910.636	0.636253	0.213753	2.97657	0.00291489	0.00625652
PF3D7_1251300	TMK	thymidylate kinase	5491.85	0.636006	0.135636	4.68905	2.7447e-06	1.04603e-05
PF3D7_1325000	LSM6	U6 snRNA-associated Sm-like protein LSm6, putative	2664.9	0.634375	0.147252	4.3081	1.64662e-05	5.52579e-05
PF3D7_1243700		ubiquitin-conjugating enzyme E2, putative	36543	0.634368	0.126362	5.02024	5.16069e-07	2.23843e-06
PF3D7_1008900	AK1	adenylate kinase	21759.7	0.634146	0.13402	4.73172	2.22628e-06	8.65043e-06
PF3D7_1030500	RPN9	26S proteasome regulatory subunit RPN9, putative	4301.82	0.632562	0.183547	3.44631	0.00056829	0.00142298
PF3D7_1229400	MIF	macrophage migration inhibitory factor	18816.3	0.631378	0.138549	4.55706	5.18743e-06	1.89875e-05
PF3D7_1208900	PPM11	protein phosphatase PPM11, putative	16825	0.631315	0.139987	4.50981	6.48856e-06	2.33989e-05
PF3D7_0528600		conserved Plasmodium protein, unknown function	2986.65	0.630559	0.181675	3.47081	0.000518898	0.00130969
PF3D7_1436600	PKG	cGMP-dependent protein kinase	4417.57	0.630248	0.131461	4.79419	1.63334e-06	6.50184e-06
PF3D7_0703600		conserved protein, unknown function	19342.8	0.630081	0.134291	4.6919	2.70681e-06	1.03306e-05
PF3D7_1344600	LipA	lipoyl synthase	2739.92	0.628661	0.173711	3.61901	0.000295734	0.000783593
PF3D7_1311800	M1AAP	M1-family alanyl aminopeptidase	24751	0.627635	0.184223	3.40693	0.000656975	0.00162308
PF3D7_1129900	MFR5	major facilitator superfamily-related transporter, putative	913.978	0.62653	0.253586	2.47068	0.0134858	0.0249189
PF3D7_0422000		steroid dehydrogenase, putative	2009.53	0.626011	0.187557	3.33771	0.000844706	0.00204175
PF3D7_0626100		oxidoreductase, short-chain dehydrogenase family, putative	6751.8	0.626011	0.154861	4.0424	5.29065e-05	0.000162226
PF3D7_0728000	eIF2alpha	eukaryotic translation initiation factor 2 subunit alpha	15110	0.625163	0.136194	4.59024	4.42732e-06	1.63728e-05
PF3D7_0414300		Rab5-interacting protein, putative	3697.11	0.624602	0.1897	3.29259	0.000992705	0.00236644
PF3D7_0107400	ATPk	ATP synthase-associated protein, putative	1274.46	0.623719	0.178733	3.48966	0.000483631	0.00122761
PF3D7_1252600		esterase, putative	2492.23	0.623571	0.136272	4.57594	4.74088e-06	1.74244e-05
PF3D7_1357900		pyrroline-5-carboxylate reductase, putative	6141.67	0.623096	0.168569	3.69638	0.000218696	0.000596303
PF3D7_1001600	XL2	exported lipase 2	20296.6	0.622394	0.171338	3.63255	0.000280636	0.00074586
PF3D7_0529000	TIP	T-cell immunomodulatory protein homolog, putative	8683.8	0.621328	0.148354	4.18815	2.81238e-05	9.02586e-05
PF3D7_0102200	RESA	ring-infected erythrocyte surface antigen	115207	0.621268	0.131045	4.74088	2.12788e-06	8.30415e-06
PF3D7_0721400		rhoptry protein, putative	11413.5	0.620542	0.164923	3.76261	0.000168152	0.000469217
PF3D7_1230600	NSUN4	RNA cytosine C(5)-methyltransferase, putative	2622.59	0.620479	0.15718	3.94758	7.89466e-05	0.00023361
PF3D7_1476500		probable protein, unknown function	379.142	0.620439	0.232711	2.66613	0.00767297	0.0151039
PF3D7_1020100		flagellar outer arm dynein-associated protein, putative	957.389	0.620427	0.221869	2.79636	0.00516816	0.0105567
PF3D7_0314900		conserved Plasmodium membrane protein, unknown function	1568.11	0.619974	0.173188	3.57977	0.000343893	0.000900161
PF3D7_1407800	PM4	plasmepsin IV	13030	0.61872	0.162667	3.80361	0.000142605	0.000403808
PF3D7_1110000		conserved Plasmodium protein, unknown function	1462.39	0.618655	0.193641	3.19486	0.001399	0.00320265
PF3D7_1010000		ribosomal protein L43, mitochondrial, putative	1755.08	0.618588	0.164111	3.76932	0.000163691	0.000457481
PF3D7_1315500		conserved protein, unknown function	9954.29	0.618144	0.145505	4.24827	2.15429e-05	7.06164e-05
PF3D7_1402300	RPN6	26S proteasome regulatory subunit RPN6	6962.02	0.617958	0.171949	3.59385	0.000325824	0.000856206
PF3D7_1472300		conserved protein, unknown function	3432.06	0.61707	0.134638	4.58317	4.57983e-06	1.69135e-05
PF3D7_1470700		conserved Plasmodium protein, unknown function	2821.63	0.616097	0.146407	4.20812	2.57506e-05	8.32395e-05
PF3D7_0720800		Ham1-like protein, putative	4475.16	0.612317	0.166697	3.67324	0.000239499	0.000646779
PF3D7_1217100	SPO11	meiotic recombination protein SPO11, putative	430.965	0.612154	0.209215	2.92595	0.00343405	0.00727768
PF3D7_1224100		conserved protein, unknown function	11196.4	0.612111	0.131458	4.65631	3.21922e-06	1.21308e-05
PF3D7_0406200	Pfs16	parasitophorous vacuole membrane protein S16	9884.64	0.61073	0.172369	3.54316	0.00039536	0.0010229
PF3D7_0409500		NAD(P)-binding protein, putative	4308.05	0.610202	0.139705	4.36778	1.25514e-05	4.32011e-05
PF3D7_1412600	DHS	deoxyhypusine synthase	1233.17	0.60875	0.189768	3.20787	0.00133723	0.00307833
PF3D7_0516700		ubiquitin carboxyl-terminal hydrolase 2, putative	6471.51	0.607721	0.155261	3.91418	9.0713e-05	0.000264979
PF3D7_0618300		60S ribosomal protein L27a, putative	20742.8	0.607087	0.132002	4.59909	4.24344e-06	1.57471e-05
PF3D7_0527900	DDX41	ATP-dependent RNA helicase DDX41, putative	2895.73	0.606384	0.154108	3.93481	8.32633e-05	0.000245355
PF3D7_0306500	COX6C	cytochrome c oxidase subunit 6c, putative	5056.52	0.604787	0.153594	3.93757	8.23102e-05	0.000242813
PF3D7_1415300		RNA-binding protein Nova-1, putative	7019.61	0.604626	0.151654	3.98688	6.69471e-05	0.000201254
PF3D7_1432500		RNA methyltransferase, putative	2852.95	0.60348	0.136573	4.41875	9.92757e-06	3.47334e-05
PF3D7_1132300		nucleic acid binding protein, putative	2213.99	0.603312	0.179969	3.35231	0.000801411	0.00194675
PF3D7_0630600		deubiquitinating enzyme MINDY, putative	6717.02	0.60294	0.157718	3.8229	0.000131892	0.000375853
PF3D7_1206100	ISN1	IMP-specific 5'-nucleotidase 1	831.68	0.601054	0.273737	2.19573	0.0281111	0.0481776
PF3D7_0528500	CPalpha	F-actin-capping protein subunit alpha, putative	5803.39	0.600979	0.168802	3.56027	0.000370478	0.000963638
PF3D7_0305600	APE1	DNA-(apurinic or apyrimidinic site) endonuclease	12102.1	0.599731	0.153113	3.91692	8.96876e-05	0.000262412
PF3D7_1017500	ELC	myosin essential light chain ELC	10415.3	0.599689	0.132812	4.51532	6.32224e-06	2.2876e-05
PF3D7_0631000		tetratricopeptide repeat protein, putative	2413.03	0.598882	0.146128	4.09834	4.16124e-05	0.000130048
PF3D7_1142500	RPL28	60S ribosomal protein L28	3158.21	0.598847	0.197472	3.03257	0.00242481	0.00529354
PF3D7_1203900	UBC	ubiquitin-conjugating enzyme E2	6801.96	0.598708	0.147906	4.04788	5.16826e-05	0.000159053
PF3D7_0722900		conserved protein, unknown function	798.079	0.597274	0.233856	2.55403	0.0106485	0.0202552
PF3D7_1012900	ATG18	autophagy-related protein 18	17018.4	0.595077	0.137388	4.33137	1.48182e-05	5.01038e-05
PF3D7_0208500	ACP	acyl carrier protein	3007.94	0.594202	0.175314	3.38936	0.000700561	0.00171889
PF3D7_0301300	EH1	epoxide hydrolase 1	1485.52	0.594179	0.175306	3.38939	0.000700483	0.00171889
PF3D7_0625000.2		sphingomyelin synthase 1, putative	1437.56	0.592318	0.177316	3.34046	0.000836399	0.00202258
PF3D7_0500100	VAR	erythrocyte membrane protein 1, PfEMP1	1543.31	0.592053	0.169418	3.49463	0.00047472	0.00120785
PF3D7_0530200	PPT	phosphoenolpyruvate/phosphate translocator	1894.79	0.591501	0.164473	3.59634	0.000322728	0.000848486
PF3D7_1451700	CNB	calcineurin subunit B	11255.8	0.590818	0.160879	3.67245	0.00024024	0.000648454
PF3D7_1302600	DOHH	deoxyhypusine hydroxylase	1483.69	0.59076	0.177611	3.32616	0.000880524	0.00211466
PF3D7_1361100	SEC24A	protein transport protein Sec24A	27246.7	0.590329	0.133581	4.41926	9.90375e-06	3.4689e-05
PF3D7_0523400		DnaJ protein, putative	4209.69	0.590091	0.149482	3.94757	7.89492e-05	0.00023361
PF3D7_0927700	PPP4	serine/threonine protein phosphatase 4, putative	2137.59	0.587935	0.160832	3.65559	0.000256596	0.000689136
PF3D7_0519300	COX10	protoheme IX farnesyltransferase	3721.58	0.587335	0.160351	3.66281	0.000249466	0.000671332
PF3D7_1144300	RPL41	60S ribosomal protein L41	7154.83	0.587109	0.222739	2.63586	0.00839244	0.0163462
PF3D7_0529200		sugar transporter, putative	774.688	0.586969	0.197679	2.96931	0.0029847	0.00639358
PF3D7_1144000	RPS21	40S ribosomal protein S21	24581.7	0.58682	0.176277	3.32896	0.00087171	0.00209664
PF3D7_1360400		conserved Plasmodium protein, unknown function	1163.09	0.585948	0.20191	2.90203	0.00370758	0.00779274
PF3D7_0901700		Plasmodium exported protein (hyp5), unknown function	3589.52	0.585375	0.188929	3.09839	0.00194578	0.0043252
PF3D7_0507600	CAF40	protein CAF40, putative	1979.55	0.584865	0.234725	2.4917	0.0127134	0.023704
PF3D7_0605300	ARK1	serine/threonine protein kinase ARK1	4128.73	0.582954	0.151428	3.8497	0.00011826	0.000339169
PF3D7_0821000		conserved Plasmodium protein, unknown function	11023	0.582784	0.139216	4.18619	2.83673e-05	9.09312e-05
PF3D7_0404900	P41	6-cysteine protein P41	23264.2	0.582308	0.13271	4.38783	1.14489e-05	3.96864e-05
PF3D7_1366000		conserved Plasmodium protein, unknown function	519.393	0.581021	0.228341	2.54453	0.0109424	0.0207406
PF3D7_0805900		conserved protein, unknown function	556.672	0.580733	0.229255	2.53313	0.0113049	0.0213599
PF3D7_1437200		ribonucleoside-diphosphate reductase large subunit, putative	14885.1	0.580186	0.141774	4.09232	4.27082e-05	0.000133085
PF3D7_1212000	TPx(Gl)	glutathione peroxidase-like thioredoxin peroxidase	4567.93	0.579146	0.171198	3.3829	0.000717247	0.00175501
PF3D7_1353900		proteasome subunit alpha type-7, putative	14134.4	0.578662	0.149785	3.86327	0.000111877	0.000322413
PF3D7_0716500		conserved Plasmodium protein, unknown function	5435.06	0.578105	0.179547	3.2198	0.00128281	0.0029645
PF3D7_1410000	EMC2	ER membrane protein complex subunit 2, putative	994.589	0.57752	0.189544	3.04689	0.0023122	0.0050787
PF3D7_1035100		probable protein, unknown function	5663.53	0.577006	0.15131	3.81339	0.000137071	0.000389165
PF3D7_1030100	PRP22	pre-mRNA-splicing factor ATP-dependent RNA helicase PRP22, putative	13148.7	0.576853	0.130523	4.41956	9.89013e-06	3.46639e-05
PF3D7_0211600	ALG14	UDP-N-acetylglucosamine transferase subunit ALG14, putative	1362.34	0.576411	0.167761	3.4359	0.000590588	0.00147331
PF3D7_0522000		conserved Plasmodium protein, unknown function	8211.96	0.575461	0.175857	3.27232	0.00106671	0.00252712
PF3D7_0911500		conserved Plasmodium protein, unknown function	461.029	0.575324	0.210274	2.73607	0.00621779	0.012497
PF3D7_1103600	ALP2a	actin-like protein, putative	789.386	0.575317	0.201379	2.85689	0.00427819	0.00888077
PF3D7_1114800	G3PDH	glycerol-3-phosphate dehydrogenase, putative	1306.66	0.575047	0.159023	3.61613	0.000299035	0.000791625
PF3D7_1322600		conserved Plasmodium protein, unknown function	7596.97	0.57393	0.131973	4.34886	1.36849e-05	4.65674e-05
PF3D7_1407400		conserved Plasmodium protein, unknown function	3102.64	0.573865	0.144301	3.97687	6.98283e-05	0.000209095
PF3D7_1413900		DnaJ protein, putative	2948.67	0.572799	0.191629	2.9891	0.00279798	0.0060297
PF3D7_0916600		methyltransferase, putative	534.057	0.571096	0.226143	2.52537	0.0115576	0.021776
PF3D7_1249600	LRR12	leucine-rich repeat protein	500.161	0.570357	0.247578	2.30375	0.0212367	0.037535
PF3D7_0921400	NifU	NifU-like scaffold protein	726.375	0.568902	0.233338	2.4381	0.0147645	0.0270213
PF3D7_1414400	PP1	serine/threonine protein phosphatase PP1	34662.9	0.567854	0.16727	3.39484	0.000686682	0.00168715
PF3D7_0731500	EBA175	erythrocyte binding antigen-175	46614.2	0.566055	0.151345	3.74016	0.000183901	0.000508143
PF3D7_1137400		UVB-resistance protein UVR8 homologue	1822.42	0.565173	0.187182	3.01937	0.00253302	0.00551632
PF3D7_0526900		transmembrane emp24 domain-containing protein, putative	13365.3	0.564633	0.127387	4.43241	9.31835e-06	3.27669e-05
PF3D7_0816100	PPCDC	phosphopantothenoylcysteine decarboxylase, putative	5817.28	0.564594	0.148488	3.80229	0.000143366	0.000405535
PF3D7_1404200		conserved Plasmodium protein, unknown function	253.873	0.561656	0.253519	2.21544	0.02673	0.0460607
PF3D7_0721200		conserved Plasmodium protein, unknown function	1760.95	0.560827	0.167647	3.34529	0.000821973	0.00199129
PF3D7_1345500	UBC	ubiquitin-conjugating enzyme E2	1131.73	0.560816	0.175176	3.20144	0.00136743	0.00313976
PF3D7_0519400	RPS24	40S ribosomal protein S24	52601.9	0.559215	0.149344	3.74448	0.00018077	0.000500005
PF3D7_0914600	ELF1	transcription elongation factor 1, putative	2605.03	0.557983	0.175654	3.1766	0.0014901	0.00339097
PF3D7_0717500	CDPK4	calcium-dependent protein kinase 4	22771.6	0.557489	0.146458	3.80649	0.000140954	0.000399346
PF3D7_0922500	PGK	phosphoglycerate kinase	32462.2	0.557261	0.119232	4.67376	2.95735e-06	1.12229e-05
PF3D7_0805200	GAMER	gamete release protein, putative	11321.8	0.556405	0.130493	4.26387	2.00913e-05	6.64263e-05
PF3D7_1024000		conserved Plasmodium protein, unknown function	7954.38	0.555773	0.147783	3.76073	0.000169421	0.000472022
PF3D7_1404400		ribosomal protein L16, mitochondrial, putative	666.091	0.552965	0.211447	2.61514	0.00891906	0.0172467
PF3D7_1332700	DBP8	ATP-dependent RNA helicase DBP8, putative	3214.48	0.552608	0.152277	3.62897	0.000284558	0.000755537
PF3D7_1348500		TBC domain protein, putative	3650.59	0.551931	0.139855	3.94645	7.93191e-05	0.000234408
PF3D7_0213300		mitochondrial respiratory chain complex II subunit, putative	1107.42	0.547538	0.183162	2.98936	0.00279566	0.00602712
PF3D7_1204600		cytidine deaminase, putative	1581.95	0.54688	0.190286	2.87399	0.00405323	0.00845961
PF3D7_1115500	ApiAP2	AP2 domain transcription factor, putative	9185.29	0.546624	0.157109	3.47926	0.000502792	0.00127145
PF3D7_0629900		CRAL/TRIO domain-containing protein, putative	4012.67	0.546073	0.151447	3.60571	0.000311296	0.000820843
PF3D7_1457200	TRX1	thioredoxin 1	29090	0.545865	0.142495	3.83077	0.000127744	0.000364421
PF3D7_1467800		conserved Plasmodium protein, unknown function	1220.64	0.542353	0.163382	3.31954	0.00090167	0.00215998
PF3D7_1223000		conserved Plasmodium protein, unknown function	5854.92	0.541624	0.143557	3.77289	0.00016137	0.000451701
PF3D7_0933200		calcyclin-binding protein, putative	2506.12	0.541522	0.192541	2.8125	0.00491576	0.0100833
PF3D7_0819700		conserved Plasmodium protein, unknown function	1014.23	0.540366	0.181707	2.97383	0.00294112	0.0063103
PF3D7_1365000		conserved Plasmodium protein, unknown function	4536.86	0.539713	0.152867	3.5306	0.000414612	0.00106603
PF3D7_1236650		conserved Plasmodium protein, unknown function	1961.63	0.537251	0.177743	3.02263	0.00250591	0.00545948
PF3D7_0909500	SPM1	subpellicular microtubule protein 1, putative	762.358	0.53713	0.195252	2.75095	0.0059422	0.0119917
PF3D7_0407200	PTH2	peptidyl-tRNA hydrolase 2, putative	4642.53	0.536934	0.193957	2.76831	0.00563481	0.0114186
PF3D7_1446800	HDP	heme detoxification protein	4408.99	0.536919	0.162326	3.30767	0.000940772	0.00224763
PF3D7_1142800	ATPTG6	ATP synthase-associated protein, putative	2637.15	0.536838	0.158435	3.38837	0.000703087	0.0017243
PF3D7_1125800		kelch domain-containing protein, putative	39714.2	0.536574	0.124031	4.32612	1.51757e-05	5.12154e-05
PF3D7_0524000	KASbeta	karyopherin beta	18091.5	0.536357	0.164789	3.25482	0.00113464	0.00265969
PF3D7_0302700		CDGSH iron-sulfur domain-containing protein, putative	504.559	0.534432	0.231386	2.30969	0.0209051	0.037022
PF3D7_0820300		conserved Plasmodium protein, unknown function	3785.01	0.534229	0.158033	3.38049	0.000723577	0.00176889
PF3D7_1470600		RAP protein, putative	3415	0.533421	0.162822	3.27609	0.00105254	0.0025002
PF3D7_1464900		ATP-dependent zinc metalloprotease FTSH, putative	4052.62	0.532093	0.165006	3.22468	0.00126112	0.00291964
PF3D7_0702900		centrin, putative	2220.44	0.530841	0.161457	3.28781	0.0010097	0.00240375
PF3D7_1224900	SF3B6	splicing factor 3B subunit 6, putative	1760.2	0.530705	0.181429	2.92514	0.003443	0.00729377
PF3D7_1307600	rpoA	DNA-directed RNA polymerase subunit alpha, putative	2354.26	0.52872	0.153279	3.4494	0.000561825	0.0014081
PF3D7_0419300		conserved Plasmodium protein, unknown function	8673.87	0.528242	0.133772	3.94883	7.8533e-05	0.000232694
PF3D7_0729500	MT-A70	N6-adenosine-methyltransferase MT-A70	3620.61	0.527789	0.148202	3.56128	0.000369052	0.000960395
PF3D7_0710600	RPL34	60S ribosomal protein L34	33977.4	0.527583	0.14574	3.62004	0.000294559	0.000780931
PF3D7_0213000		conserved protein, unknown function	4261.83	0.527521	0.148043	3.56329	0.000366229	0.000953973
PF3D7_0710500		conserved protein, unknown function	2878.83	0.527465	0.151007	3.49298	0.00047766	0.00121418
PF3D7_1203600	CC1HL	cytochrome c1 heme lyase, putative	805.922	0.5273	0.212979	2.47583	0.0132926	0.0246298
PF3D7_1413500	SufC	iron-sulfur cluster assembly protein SufC	2441.6	0.526493	0.166516	3.16181	0.0015679	0.00355144
PF3D7_0621200	PDX1	pyridoxine biosynthesis protein PDX1	9744.18	0.525392	0.21129	2.48659	0.0128974	0.0240137
PF3D7_0702400	SEMP1	small exported membrane protein 1	2903.31	0.523547	0.140304	3.73152	0.00019033	0.000524286
PF3D7_0105600		FtsJ-like methyltransferase, putative	1115.72	0.522979	0.175451	2.98077	0.00287521	0.00617629
PF3D7_1204300	EIF5A	eukaryotic translation initiation factor 5A	57876	0.521782	0.129824	4.01915	5.84073e-05	0.000177874
PF3D7_0605100	KH1	KH domain-containing protein, putative	4399.9	0.521444	0.156253	3.33717	0.000846353	0.00204481
PF3D7_1417500	CBF5	H/ACA ribonucleoprotein complex subunit 4, putative	4175.97	0.52023	0.144558	3.59877	0.000319725	0.000841416
PF3D7_1124700	MGE1	GrpE protein homolog, mitochondrial, putative	6868.58	0.519895	0.145727	3.56758	0.000360292	0.000939877
PF3D7_1431600	SCS-beta	succinate--CoA ligase [ADP-forming] subunit beta	5065.76	0.518124	0.147489	3.51296	0.000443149	0.00113439
PF3D7_1216500	MDV1	male development gene 1	1325.76	0.51797	0.205517	2.52032	0.0117247	0.0220502
PF3D7_0514200		conserved Plasmodium protein, unknown function	2377.68	0.516336	0.146143	3.53309	0.00041074	0.00105771
PF3D7_0417200	DHFR-TS	bifunctional dihydrofolate reductase-thymidylate synthase	2867.58	0.515638	0.155776	3.31012	0.000932561	0.00223
PF3D7_1420400	GlyRS	glycine--tRNA ligase	7828.77	0.514128	0.142271	3.61371	0.000301845	0.000798275
PF3D7_0218000	RFC2	replication factor C subunit 2, putative	3359.82	0.511637	0.176035	2.90646	0.00365548	0.00769228
PF3D7_1461400		MORN repeat protein, putative	13848.8	0.509507	0.134122	3.79883	0.000145382	0.000410374
PF3D7_0829200	PHB1	prohibitin 1, putative	4652.48	0.509131	0.175329	2.90386	0.0036859	0.00775022
PF3D7_1104100	SYN13	syntaxin, Qa-SNARE family	6227.65	0.508681	0.143972	3.5332	0.000410556	0.00105771
PF3D7_1129700		conserved Plasmodium protein, unknown function	1429.68	0.508212	0.204903	2.48026	0.0131288	0.0243854
PF3D7_1202100.2		SRAP domain-containing protein, putative	8361.72	0.508055	0.133599	3.80282	0.000143056	0.000404874
PF3D7_0818400	FCF1	rRNA-processing protein FCF1, putative	3827.63	0.507226	0.143501	3.53465	0.000408318	0.00105288
PF3D7_1457600		conserved Plasmodium protein, unknown function	1197.1	0.507132	0.204787	2.47638	0.0132721	0.0246115
PF3D7_0528000	UMP1	proteasome maturation factor UMP1, putative	2946.36	0.505671	0.180658	2.79905	0.00512539	0.0104773
PF3D7_1245300	UBC12	NEDD8-conjugating enzyme UBC12, putative	1171.84	0.505129	0.175314	2.88127	0.00396073	0.00828911
PF3D7_1432100		voltage-dependent anion-selective channel protein, putative	1488.13	0.504764	0.220159	2.29272	0.021864	0.0384915
PF3D7_0935600	GIG	gametocytogenesis-implicated protein	37610.6	0.504117	0.139584	3.61156	0.00030436	0.000804134
PF3D7_1369700	SNRPA1	U2 small nuclear ribonucleoprotein A', putative	1425.89	0.504084	0.192477	2.61893	0.00882048	0.0170869
PF3D7_1025300		conserved protein, unknown function	503.364	0.502314	0.229233	2.19128	0.0284314	0.0486645
PF3D7_1253100		Plasmodium exported protein (PHISTa), unknown function	3906.5	0.501719	0.14813	3.38702	0.000706558	0.00173202
PF3D7_0927900	PSD	phosphatidylserine decarboxylase	17927.5	0.501669	0.136423	3.6773	0.000235711	0.000639031
PF3D7_0724300	COQ3	ubiquinone biosynthesis O-methyltransferase, putative	718.707	0.498881	0.20419	2.44322	0.0145571	0.026678
PF3D7_1455400	HlyIII	hemolysin III	2304.19	0.498755	0.166349	2.99825	0.00271538	0.00587529
PF3D7_1443900	HSP90	heat shock protein 90, putative	4243.39	0.498151	0.146705	3.3956	0.000684783	0.00168326
PF3D7_0501300	SBP1	skeleton-binding protein 1	15744	0.498074	0.156581	3.18093	0.00146803	0.00334641
PF3D7_1336100		WPP motif-containing protein, putative	850.708	0.496693	0.209378	2.37224	0.0176808	0.031816
PF3D7_1338700		conserved protein, unknown function	3787.9	0.496299	0.172755	2.87286	0.0040678	0.00848671
PF3D7_0529400		conserved Plasmodium protein, unknown function	1491.78	0.495399	0.189353	2.61628	0.00888948	0.0172126
PF3D7_0816600	ClpB1	chaperone protein ClpB1	3009.86	0.495362	0.185445	2.67121	0.00755779	0.0148935
PF3D7_0501800	CAF1A	chromatin assembly factor 1 subunit A	7725.72	0.492719	0.152258	3.23608	0.00121184	0.00281991
PF3D7_0724800		kelch domain-containing protein, putative	3145.93	0.491981	0.162202	3.03315	0.00242019	0.00528776
PF3D7_1012600	GMPS	GMP synthase [glutamine-hydrolyzing]	5022.36	0.491469	0.17771	2.76556	0.00568256	0.0115023
PF3D7_1439700		leucine carboxyl methyltransferase, putative	6335.84	0.49115	0.153983	3.18964	0.00142451	0.00325413
PF3D7_0717100		CRAL/TRIO domain-containing protein, putative	5287.57	0.49111	0.150228	3.26911	0.00107888	0.00255034
PF3D7_0303300	RPB6	DNA-directed RNA polymerases I, II, and III subunit RPABC2, putative	4849.07	0.490836	0.157737	3.11173	0.00185992	0.00415329
PF3D7_1417800	MCM2	DNA replication licensing factor MCM2	9786.22	0.490798	0.148794	3.29851	0.00097198	0.00231806
PF3D7_0719600		60S ribosomal protein L11a, putative	20980.4	0.489508	0.125707	3.89404	9.85873e-05	0.000286576
PF3D7_0714000	H2B.Z	histone H2B variant	98932.9	0.48914	0.133452	3.6653	0.000247054	0.000665841
PF3D7_0501500	RAP3	rhoptry-associated protein 3	69037	0.488756	0.15915	3.07104	0.00213312	0.00471235
PF3D7_1457000	SPP	signal peptide peptidase	14400.5	0.487737	0.145102	3.36134	0.00077565	0.00188674
PF3D7_1222500	DPH6	diphthine--ammonia ligase, putative	5528.54	0.48762	0.133679	3.64769	0.000264606	0.00070711
PF3D7_0212300	ERF1	eukaryotic peptide chain release factor subunit 1, putative	5857.27	0.486767	0.180279	2.70008	0.00693219	0.0137873
PF3D7_0621800		nascent polypeptide-associated complex subunit alpha, putative	17965.9	0.485511	0.142016	3.41871	0.000629182	0.00156016
PF3D7_1037900		conserved Plasmodium protein, unknown function	1825.37	0.485394	0.18611	2.6081	0.00910469	0.0175677
PF3D7_1357500		DNA helicase, putative	4046.68	0.48527	0.159576	3.04099	0.002358	0.00516662
PF3D7_1412900		ubiquitin-conjugating enzyme E2, putative	4169.92	0.484156	0.154453	3.13466	0.00172055	0.00386782
PF3D7_1308100		CCAAT-binding transcription factor, putative	2402.5	0.481966	0.163459	2.94854	0.00319277	0.00680398
PF3D7_1440800	MFS6	major facilitator superfamily domain-containing protein, putative	1517.76	0.481733	0.153909	3.12998	0.00174818	0.00392663
PF3D7_1017400	HAD5	phosphomannomutase	8233.68	0.480011	0.141524	3.39172	0.000694541	0.00170568
PF3D7_1113500		GTP-binding protein, putative	1367.6	0.479131	0.183826	2.60643	0.00914904	0.0176406
PF3D7_1023300		conserved protein, unknown function	2615.42	0.478123	0.140332	3.40709	0.000656587	0.00162287
PF3D7_1332500		nucleotidyltransferase, putative	8353.08	0.478032	0.144136	3.31654	0.000911388	0.00218131
PF3D7_1455100	PTP1	protein tyrosine phosphatase, putative	2385.22	0.477874	0.200396	2.38465	0.0170952	0.030897
PF3D7_1446900		glutaminyl-peptide cyclotransferase, putative	4205.5	0.477799	0.142134	3.3616	0.000774911	0.00188579
PF3D7_0932000		conserved Plasmodium protein, unknown function	24055.8	0.477389	0.149022	3.20348	0.0013578	0.00312032
PF3D7_0217900		thioesterase/thiol ester dehydrase-isomerase, putative	5611.48	0.476997	0.149665	3.18709	0.00143712	0.00328013
PF3D7_1326300		RNA-binding protein, putative	2854.71	0.475731	0.174115	2.73228	0.00628972	0.012636
PF3D7_1430100	PTPA	serine/threonine protein phosphatase 2A activator	2463.25	0.475442	0.145174	3.27498	0.00105669	0.00250629
PF3D7_1007400		conserved protein, unknown function	4052.17	0.47476	0.158985	2.9862	0.00282465	0.00608474
PF3D7_1222900		conserved Plasmodium protein, unknown function	4999.52	0.473166	0.156538	3.0227	0.0025053	0.00545948
PF3D7_1108100		conserved Plasmodium protein, unknown function	2809.41	0.473051	0.17856	2.64925	0.00806702	0.0158157
PF3D7_0824500		conserved protein, unknown function	2687.54	0.472988	0.171331	2.76066	0.0057684	0.0116629
PF3D7_0404400	P36	6-cysteine protein P36	778.689	0.472678	0.199884	2.36476	0.018042	0.0323898
PF3D7_1218300	AP2-MU	AP-2 complex subunit mu	5977.19	0.472045	0.135946	3.47229	0.000516041	0.00130309
PF3D7_0109600	CoSP	cold-shock protein, putative	1063.36	0.471929	0.18934	2.4925	0.0126848	0.0236603
PF3D7_1234800	SF3B3	splicing factor 3B subunit 3, putative	13995.1	0.471244	0.145204	3.24538	0.00117292	0.00274005
PF3D7_0503600	MyoB	myosin B	12437.8	0.470896	0.140141	3.36017	0.000778953	0.00189391
PF3D7_0617400	VAR	erythrocyte membrane protein 1, PfEMP1	773.03	0.469616	0.198674	2.36375	0.0180911	0.0324368
PF3D7_0525800	IMC1g	inner membrane complex protein 1g, putative	43377.7	0.468857	0.163713	2.86389	0.00418471	0.00870692
PF3D7_0719100		ATP synthase F0 subunit a-like protein, putative	4378.08	0.468791	0.144798	3.23756	0.00120558	0.00280901
PF3D7_1236800		S-adenosyl-methyltransferase, putative	6702.33	0.468518	0.139026	3.36999	0.000751716	0.00183267
PF3D7_1454500	ISCU	iron-sulfur cluster assembly protein ISCU	2994.72	0.467261	0.162787	2.87039	0.00409966	0.00853659
PF3D7_0313100	HRD3	ubiquitin-protein ligase, putative	12062.7	0.466862	0.134679	3.46647	0.000527347	0.00132789
PF3D7_1321200		zinc finger protein, putative	1574.11	0.466224	0.176179	2.64631	0.00813742	0.0159247
PF3D7_1362200	RUVB3	RuvB-like helicase 3	1664.57	0.466107	0.164929	2.8261	0.00471181	0.00970206
PF3D7_1472600	PDI-14	protein disulfide-isomerase	14515.5	0.465789	0.125419	3.71386	0.000204121	0.00055969
PF3D7_0908100		apicoplast integral membrane protein, putative	710.374	0.465294	0.179243	2.59588	0.00943491	0.0181526
PF3D7_1321900		conserved protein, unknown function	10123	0.465221	0.155358	2.99452	0.00274881	0.00593328
PF3D7_1121000	DHHC3	palmitoyltransferase DHHC3	4709.93	0.463313	0.135466	3.42014	0.00062588	0.00155269
PF3D7_1361500		PH domain-containing protein, putative	18306	0.462469	0.138289	3.34423	0.000825102	0.00199707
PF3D7_1332800		eukaryotic translation initiation factor 6, putative	2761.43	0.460742	0.165347	2.78651	0.00532784	0.0108539
PF3D7_0827500		ribosomal protein L21, apicoplast, putative	3750.33	0.460284	0.135274	3.4026	0.000667476	0.00164448
PF3D7_0603200	BCS1	mitochondrial chaperone BCS1, putative	5816.25	0.460189	0.147458	3.12082	0.00180345	0.00404064
PF3D7_1355900		RWD domain-containing protein, putative	1912.57	0.459935	0.16998	2.70582	0.00681368	0.0135768
PF3D7_1223700	VIT	vacuolar iron transporter	5816.16	0.459453	0.129258	3.55455	0.000378625	0.000982448
PF3D7_0902100	FIKK9.2	serine/threonine protein kinase, FIKK family	2772.02	0.459276	0.159227	2.88441	0.00392144	0.0082165
PF3D7_1466800		NOC3 domain-containing protein, putative	1089.98	0.458454	0.196903	2.32833	0.0198947	0.0354079
PF3D7_1234900		CHCH domain-containing protein, putative	19639.8	0.458373	0.12927	3.54586	0.000391339	0.00101348
PF3D7_0722600	UTP7	U3 small nucleolar RNA-associated protein 7, putative	14533.1	0.457794	0.206634	2.21548	0.026727	0.0460607
PF3D7_0817800	C3AP3	respiratory chain complex 3 associated protein 3	3189.59	0.457692	0.193191	2.36912	0.0178306	0.0320418
PF3D7_1106100		ribosomal protein S15, apicoplast, putative	2896.11	0.457327	0.150241	3.04396	0.00233484	0.00511795
PF3D7_0708400	HSP90	heat shock protein 90	161848	0.457196	0.128526	3.55723	0.000374779	0.000973882
PF3D7_1146900		protein YIPF6, putative	2056.44	0.457064	0.145666	3.13776	0.00170241	0.00383025
PF3D7_0218800		ribonuclease P	1947.88	0.456326	0.167647	2.72195	0.00648974	0.0130086
PF3D7_1027200		ribosomal protein S22, mitochondrial, putative	1721.65	0.456282	0.162792	2.80286	0.00506516	0.010362
PF3D7_1235000	PIH1	PIH1 domain-containing protein, putative	902.632	0.455992	0.184293	2.47427	0.0133508	0.02472
PF3D7_0916500	UFD1	ubiquitin fusion degradation protein 1	4862.36	0.455728	0.166809	2.73203	0.00629453	0.0126409
PF3D7_1443700	DPCK	dephospho-CoA kinase	1553.89	0.454499	0.172221	2.63904	0.00831411	0.016229
PF3D7_0716600	SufS	cysteine desulfurase	800.43	0.451622	0.196751	2.2954	0.0217104	0.0382336
PF3D7_0303700	BCKDH-E2	lipoamide acyltransferase component of branched-chain alpha-keto acid dehydrogenase complex	5229.94	0.450347	0.143491	3.13851	0.00169808	0.00382211
PF3D7_1117100	UCH54	ubiquitin carboxyl-terminal hydrolase UCH54	4743.46	0.448611	0.151705	2.95712	0.00310529	0.00662807
PF3D7_0908400		conserved Plasmodium protein, unknown function	2805.57	0.446903	0.147366	3.0326	0.00242456	0.00529354
PF3D7_0603300	DHODH	dihydroorotate dehydrogenase	4953.04	0.446751	0.163088	2.73933	0.00615652	0.0123916
PF3D7_1223100	PKAr	cAMP-dependent protein kinase regulatory subunit	45186.5	0.446512	0.138956	3.21334	0.00131202	0.00302418
PF3D7_1351100		conserved protein, unknown function	3030.56	0.446496	0.177177	2.52005	0.0117337	0.0220536
PF3D7_0715700		conserved protein, unknown function	733.742	0.446231	0.193436	2.30687	0.021062	0.0372753
PF3D7_0113700	HSP40	heat shock protein 40, type II	2578.13	0.444502	0.154126	2.88402	0.00392639	0.00822045
PF3D7_0308700		conserved protein, unknown function	3572.76	0.444074	0.16704	2.65849	0.00784925	0.0154169
PF3D7_1406900	RlmN	radical SAM protein, putative	918.218	0.443909	0.202649	2.19054	0.0284854	0.0487257
PF3D7_0906100	VPS46	vacuolar protein sorting-associated protein 46, putative	6740.76	0.443723	0.136613	3.24802	0.00116212	0.002716
PF3D7_1445400	CLK1	protein serine/threonine kinase-1	11554.5	0.44186	0.14581	3.03039	0.0024424	0.00532977
PF3D7_1333300		transmembrane emp24 domain-containing protein, putative	4987.71	0.439076	0.14168	3.09907	0.00194127	0.00431698
PF3D7_0415400		coatomer subunit zeta, putative	6079.31	0.438011	0.135513	3.23224	0.00122823	0.00285434
PF3D7_0310600	EIF3K	eukaryotic translation initiation factor 3 subunit K, putative	5052.67	0.437473	0.150103	2.91448	0.00356286	0.00751507
PF3D7_1229500	CCT3	T-complex protein 1 subunit gamma	15053.5	0.435456	0.13701	3.17827	0.00148155	0.00337435
PF3D7_0618500	MDH	malate dehydrogenase	2811.51	0.435121	0.155853	2.79187	0.00524046	0.0106962
PF3D7_1456900		conserved protein, unknown function	4217.39	0.434387	0.179118	2.42514	0.0153023	0.0279103
PF3D7_0618600	ROM10	rhomboid protease ROM10	2218.01	0.434221	0.151961	2.85745	0.00427064	0.00887538
PF3D7_1025100	GFPT	glutamine--fructose-6-phosphate aminotransferase [isomerizing], putative	5311.11	0.434187	0.159363	2.72453	0.00643939	0.0129125
PF3D7_0809100	VAR	erythrocyte membrane protein 1, PfEMP1	885.871	0.432813	0.174517	2.48007	0.0131358	0.0243898
PF3D7_0920000	ELO3	elongation of fatty acids protein, putative	887.237	0.431058	0.1958	2.20152	0.0276992	0.0475629
PF3D7_1126000	ThrRS	threonine--tRNA ligase	14210.5	0.430659	0.14298	3.01203	0.00259508	0.00563773
PF3D7_0902500	FIKK9.6	serine/threonine protein kinase, FIKK family	3330.16	0.430555	0.179501	2.39861	0.0164572	0.0298277
PF3D7_1135600	CAPD3	condensin-2 complex subunit D3, putative	4142.13	0.430197	0.151444	2.84064	0.00450231	0.00930639
PF3D7_0604700	GILP	glyoxalase I-like protein GILP	3435.57	0.429933	0.155668	2.76186	0.0057473	0.0116246
PF3D7_0722500	CWC15	pre-mRNA-splicing factor CWC15, putative	6043.77	0.429446	0.129286	3.32168	0.000894769	0.00214441
PF3D7_0109500		N-acetyltransferase, GNAT family, putative	1486.82	0.42925	0.173493	2.47416	0.0133551	0.02472
PF3D7_1035700	DBLMSP	duffy binding-like merozoite surface protein	19466.8	0.428472	0.16038	2.67161	0.00754881	0.0148813
PF3D7_1325100		phosphoribosylpyrophosphate synthetase	27965.5	0.427383	0.161971	2.63863	0.00832409	0.0162367
PF3D7_0916000	MFS2	major facilitator superfamily domain-containing protein, putative	7158.1	0.426223	0.178302	2.39046	0.0168273	0.0304743
PF3D7_1333000	CPN20	20 kDa chaperonin	4968.29	0.424275	0.161796	2.62229	0.00873411	0.0169379
PF3D7_0926900		replication termination factor, putative	1695.76	0.423731	0.156298	2.71104	0.00670715	0.0133943
PF3D7_0920100		chaperone, putative	1770.19	0.423232	0.149828	2.82479	0.00473121	0.00973827
PF3D7_0320500	Nico	nicotinamidase, putative	24542.1	0.422946	0.137933	3.06631	0.00216716	0.00478165
PF3D7_0824100		3'-5' exonuclease, putative	1307.28	0.422766	0.173916	2.43086	0.015063	0.0275112
PF3D7_0104200		StAR-related lipid transfer protein	3577.91	0.421749	0.169734	2.48476	0.0129637	0.0241288
PF3D7_0621500	RPP1	ribonuclease P/MRP protein subunit RPP1, putative	1468.1	0.420577	0.163953	2.56523	0.0103108	0.0196687
PF3D7_1124600	EK	ethanolamine kinase	24919.7	0.420285	0.13064	3.21713	0.00129482	0.00298968
PF3D7_1358700	YOP1L	YOP1-like protein, putative	13370.8	0.419668	0.184159	2.27884	0.0226766	0.0397916
PF3D7_1204200		conserved Plasmodium protein, unknown function	1176.5	0.418957	0.165519	2.53117	0.0113683	0.0214569
PF3D7_1248200	RBM22	pre-mRNA-splicing factor RBM22, putative	5516.88	0.417793	0.150327	2.77922	0.00544892	0.0110837
PF3D7_0717300		transcription initiation factor IIE subunit alpha, putative	3430.29	0.416675	0.141697	2.94062	0.0032756	0.00696666
PF3D7_1128400	FPPS/GGPPS	bifunctional farnesyl/geranylgeranyl diphosphate synthase	10497.6	0.415686	0.135991	3.05672	0.00223776	0.00492527
PF3D7_0720900		tetratricopeptide repeat protein, putative	1287.7	0.415429	0.160068	2.59532	0.00945015	0.0181755
PF3D7_0911000		phosphatidylinositol N-acetylglucosaminyltransferase, putative	3978.38	0.415157	0.172871	2.40154	0.0163263	0.0296169
PF3D7_1142700		methyltransferase, putative	4328.95	0.413958	0.149444	2.77	0.0056057	0.0113639
PF3D7_0822600	SEC23	protein transport protein SEC23	8302.21	0.41084	0.131588	3.12218	0.00179518	0.00402378
PF3D7_1308300	RPS27	40S ribosomal protein S27	15581	0.409073	0.157903	2.59066	0.00957907	0.0184036
PF3D7_0728300		conserved protein, unknown function	1515.34	0.408435	0.166263	2.45656	0.0140274	0.0258131
PF3D7_0302500	CLAG3.1	cytoadherence linked asexual protein 3.1	68624.9	0.408412	0.136016	3.00268	0.00267611	0.00579968
PF3D7_0219900		Plasmodium exported protein, unknown function	2869.34	0.40796	0.143128	2.85031	0.00436765	0.00903849
PF3D7_1365100	mtRPS17	ribosomal protein S17, mitochondrial	2059.36	0.407907	0.164014	2.48702	0.0128818	0.023993
PF3D7_1217100.2		meiotic recombination protein SPO11, putative	822.767	0.407603	0.172241	2.36646	0.0179591	0.0322518
PF3D7_1001700		Plasmodium exported protein (PHISTc), unknown function	4847.36	0.406945	0.154591	2.63239	0.00847856	0.0164781
PF3D7_1373500	VAR	erythrocyte membrane protein 1, PfEMP1	1615.86	0.40676	0.162912	2.49681	0.0125318	0.0233978
PF3D7_0605900		elongation of fatty acids protein, putative	4333.94	0.406172	0.129597	3.13412	0.00172368	0.00387323
PF3D7_1354500	ADSS	adenylosuccinate synthetase	7791.51	0.40462	0.129886	3.11521	0.00183815	0.0041098
PF3D7_1352800	MON1	vacuolar fusion protein MON1, putative	1406.72	0.403375	0.184304	2.18863	0.0286234	0.0489306
PF3D7_1023000		conserved Plasmodium protein, unknown function	2216.18	0.402726	0.162687	2.47547	0.0133061	0.0246464
PF3D7_1138500	PPM2	protein phosphatase PPM2	7593.56	0.402471	0.183805	2.18966	0.0285487	0.0488184
PF3D7_0401600.2		rifin	6063.89	0.402081	0.136857	2.93796	0.00330382	0.00701833
PF3D7_0111500		UMP-CMP kinase, putative	8838.51	0.401768	0.156895	2.56074	0.0104448	0.0199031
PF3D7_1003300	ARD1	N-terminal acetyltransferase A complex catalytic subunit ARD1, putative	6683.78	0.401057	0.168223	2.38408	0.0171219	0.0309243
PF3D7_1119000		acyl-CoA-binding protein, putative	9611.88	0.40056	0.130666	3.06552	0.00217289	0.00479233
PF3D7_1231500		mitosis protein dim1, putative	1989.83	0.399511	0.182601	2.18789	0.0286774	0.0489987
PF3D7_0504400		ATP-dependent helicase, putative	3119.97	0.39929	0.169527	2.35531	0.018507	0.033114
PF3D7_0322300	DGAT	diacylglycerol O-acyltransferase	7279.75	0.398373	0.156993	2.53751	0.0111643	0.0211315
PF3D7_1350200	SNRPE	small nuclear ribonucleoprotein E, putative	1724.32	0.397579	0.171807	2.3141	0.0206622	0.0366402
PF3D7_1329700	ACBP1	apicoplast calcium binding protein 1	2552.06	0.397517	0.163949	2.42464	0.0153238	0.02794
PF3D7_1477800	ACBP	acyl-CoA binding protein	3812.76	0.396485	0.159073	2.49248	0.0126856	0.0236603
PF3D7_0306600	ATPTG17	ATP synthase-associated protein, putative	4317.79	0.396091	0.146947	2.69547	0.00702894	0.0139539
PF3D7_1445900	DDX17	ATP-dependent RNA helicase DDX17	11200	0.392789	0.159356	2.46485	0.0137072	0.025276
PF3D7_1144900	RAB6	ras-related protein Rab-6	2840.28	0.391992	0.136496	2.87182	0.00408117	0.00851129
PF3D7_1237700		conserved protein, unknown function	23435.5	0.391872	0.153584	2.55151	0.0107257	0.0203947
PF3D7_0907800		ribosomal protein L35, apicoplast, putative	10329.9	0.391656	0.158415	2.47234	0.0134233	0.0248292
PF3D7_1330600		elongation factor Tu, putative	3245.27	0.391163	0.137042	2.85433	0.00431274	0.00894055
PF3D7_1363300		50S ribosomal protein L9, mitochondrial, putative	1128.93	0.389684	0.169319	2.30148	0.0213644	0.0376985
PF3D7_1249100		THUMP domain-containing protein, putative	4564.38	0.389395	0.157752	2.4684	0.013572	0.0250438
PF3D7_1112200	COQ4	ubiquinone biosynthesis protein COQ4, putative	1053.88	0.389126	0.174208	2.23368	0.025504	0.0442036
PF3D7_1218000	TRAMP	thrombospondin-related apical membrane protein	9934.16	0.388468	0.164387	2.36314	0.018121	0.0324665
PF3D7_0934500		V-type proton ATPase subunit E, putative	10957.5	0.388129	0.144506	2.6859	0.00723347	0.0143122
PF3D7_0217100		ATP synthase subunit alpha, mitochondrial	11850.7	0.387872	0.154369	2.51263	0.0119837	0.0224683
PF3D7_1411900		p1/s1 nuclease, putative	2431.82	0.385387	0.149528	2.57736	0.00995569	0.019093
PF3D7_0509000	alphaSNAP	alpha-soluble NSF attachment protein, putative	9413.44	0.384001	0.147174	2.60917	0.00907623	0.0175317
PF3D7_0710800	USE1	protein transport protein USE1, putative	2311.03	0.38336	0.154132	2.48722	0.0128746	0.0239878
PF3D7_1310000	OSCP	ATP synthase subunit O, mitochondrial, putative	958.477	0.383261	0.166881	2.29662	0.0216406	0.0381232
PF3D7_1220200		conserved Plasmodium protein, unknown function, pseudogene	1702.9	0.382063	0.149012	2.56398	0.0103481	0.0197327
PF3D7_1234000		conserved Plasmodium protein, unknown function	1690.96	0.378836	0.159777	2.37103	0.0177388	0.031899
PF3D7_1143400		translation initiation factor eIF-1A, putative	13239.1	0.378831	0.144833	2.61565	0.00890588	0.0172329
PF3D7_1016700		Plasmodium exported protein (PHISTc), unknown function	1969.84	0.377058	0.152209	2.47725	0.0132401	0.0245665
PF3D7_1467300	DXR	1-deoxy-D-xylulose 5-phosphate reductoisomerase	3872.7	0.376572	0.144051	2.61416	0.00894462	0.0172899
PF3D7_1031500	DDX3X	ATP-dependent DNA helicase DDX3X	6102.12	0.375849	0.135846	2.76673	0.00566213	0.0114696
PF3D7_1438900	Trx-Px1	thioredoxin peroxidase 1	32801.3	0.375336	0.139445	2.69164	0.00711024	0.0140944
PF3D7_0212800	MATE	multidrug efflux pump, putative	1437.63	0.372913	0.155068	2.40484	0.0161798	0.0294008
PF3D7_0615500	CRK5	cdc2-related protein kinase 5	11531.3	0.372909	0.127321	2.92889	0.00340171	0.00721486
PF3D7_1210600		kelch protein, putative	4970.15	0.371612	0.162189	2.29123	0.0219504	0.0386183
PF3D7_0401600	RIF	rifin	6228.39	0.370709	0.136351	2.71878	0.00655227	0.0131192
PF3D7_1303100		methyltransferase, putative	4501.92	0.369891	0.141814	2.60829	0.00909954	0.0175641
PF3D7_0312100		E3 ubiquitin-protein ligase	3408.27	0.369276	0.153716	2.40232	0.0162912	0.0295633
PF3D7_1232600		conserved Plasmodium protein, unknown function	5717.11	0.36892	0.161938	2.27815	0.0227176	0.0398375
PF3D7_0816700	TRAPPC2L	trafficking protein particle complex subunit 2-like protein, putative	1725.88	0.367674	0.159077	2.3113	0.020816	0.0368765
PF3D7_1239700	FTSH1	ATP-dependent zinc metalloprotease FTSH 1	6498.89	0.367566	0.146593	2.50739	0.0121628	0.0227882
PF3D7_1356300		ubiquitin-conjugating enzyme E2, putative	16734.4	0.367425	0.15237	2.4114	0.0158915	0.028926
PF3D7_1301700	CBP2	CX3CL1-binding protein 2	3475.71	0.367265	0.144285	2.54542	0.0109146	0.0206953
PF3D7_1127900		conserved Plasmodium protein, unknown function	5758.29	0.367039	0.133801	2.74316	0.00608506	0.0122615
PF3D7_0523300	ApiCOX18	cytochrome c oxidase subunit ApiCOX18, putative	3234.08	0.36577	0.150942	2.42324	0.0153827	0.0280189
PF3D7_0522500	RPL17	50S ribosomal protein L17, apicoplast, putative	2575.14	0.364738	0.148562	2.45512	0.0140837	0.0258989
PF3D7_1455200		methyltransferase AAMT	4889.97	0.363745	0.16583	2.19347	0.0282733	0.0484247
PF3D7_1361800	GAC	glideosome-associated connector	111767	0.363049	0.122729	2.95814	0.00309503	0.00661145
PF3D7_1346900		conserved Plasmodium protein, unknown function	6372	0.363042	0.152385	2.3824	0.0172003	0.0310392
PF3D7_0725200		mago nashi protein homologue, putative	9320.5	0.359955	0.164792	2.18431	0.0289397	0.0493769
PF3D7_0920500		ADP-ribosylation factor, putative	14216.4	0.359649	0.129613	2.77479	0.00552369	0.0112188
PF3D7_1217900		PPPDE peptidase domain-containing protein, putative	5464.87	0.358489	0.129673	2.76455	0.0057001	0.0115335
PF3D7_0111900		mitochondrial distribution and morphology protein, putative	3388.56	0.358143	0.147174	2.43346	0.0149552	0.0273424
PF3D7_1403600	Sel1	selenoprotein	7123.38	0.357828	0.135776	2.63542	0.0084032	0.0163612
PF3D7_0218500	SNRPD2	small nuclear ribonucleoprotein Sm D2, putative	3763.3	0.357134	0.151874	2.35152	0.018697	0.0334316
PF3D7_1351400		60S ribosomal protein L17, putative	47732.8	0.356698	0.129638	2.75149	0.00593242	0.0119809
PF3D7_1309800		homeobox domain-containing protein, putative	3992.98	0.356612	0.134711	2.64724	0.00811519	0.015895
PF3D7_1031400	OTU	OTU-like cysteine protease	4838.18	0.356167	0.144273	2.46871	0.0135602	0.0250306
PF3D7_1008800	NOP5	nucleolar protein 5, putative	10956.5	0.355068	0.140365	2.5296	0.0114192	0.0215412
PF3D7_0612000		conserved Plasmodium protein, unknown function	5541.42	0.34865	0.156186	2.23227	0.0255968	0.0443358
PF3D7_1337900		conserved Plasmodium protein, unknown function	5080.33	0.347883	0.141656	2.45583	0.014056	0.0258569
PF3D7_1338400		SprT-like domain-containing protein, putative	2901.39	0.346951	0.145682	2.38157	0.017239	0.0310627
PF3D7_0913300		conserved protein, unknown function	2444	0.346792	0.146672	2.36441	0.0180589	0.0323986
PF3D7_1328100		proteasome subunit beta type-7, putative	11143.2	0.345534	0.131389	2.62985	0.00854217	0.0165957
PF3D7_1102700	ETRAMP11.1	early transcribed membrane protein 11.1	71316.7	0.343475	0.152427	2.25337	0.024236	0.0421831
PF3D7_1472800		HSP20-like chaperone, putative	7997.14	0.341812	0.145763	2.34498	0.019028	0.0340007
PF3D7_1313000	NEDD8	ubiquitin-like protein Nedd8	2914.52	0.339821	0.15256	2.22745	0.0259169	0.0448614
PF3D7_1428200	MFS5	major facilitator superfamily domain-containing protein, putative	3836.15	0.3381	0.133558	2.53148	0.0113582	0.0214454
PF3D7_1248900	RPT6	26S protease regulatory subunit 8, putative	22470.7	0.336804	0.132094	2.54974	0.0107804	0.0204843
PF3D7_0812700	SNRPC	U1 small nuclear ribonucleoprotein C, putative	5110.97	0.335239	0.144159	2.32547	0.0200466	0.0356547
PF3D7_0511000	TCTP	translationally-controlled tumor protein homolog	19659	0.334518	0.136869	2.44407	0.0145226	0.0266239
PF3D7_1333800		Voldacs domain-containing protein, putative	5654.12	0.334332	0.145186	2.30278	0.0212912	0.0376189
PF3D7_0210600	CERLI1	protein CERLI1	34584	0.333616	0.132586	2.51623	0.0118618	0.0222632
PF3D7_0528300		conserved protein, unknown function	4085.8	0.330513	0.151183	2.18617	0.0288028	0.0491747
PF3D7_1232700	ND9	Nd9 protein	6809.96	0.325295	0.129918	2.50385	0.012285	0.0229771
PF3D7_1246300	KIC4	protein KIC4	10063.7	0.324596	0.131556	2.46736	0.0136112	0.0251075
PF3D7_0621100		conserved Plasmodium protein, unknown function	10800.4	0.321719	0.140014	2.29777	0.0215751	0.0380203
PF3D7_1354200	SAC1	phosphoinositide phosphatase SAC1	5607.26	0.321642	0.141612	2.27129	0.0231297	0.0404676
PF3D7_1250200		CSC1-like protein, putative	11669.9	0.320999	0.129894	2.47124	0.0134647	0.0248886
PF3D7_1345600		inner membrane complex protein	16997.7	0.316778	0.13207	2.39857	0.0164591	0.0298277
PF3D7_0913200	EF-1beta	elongation factor 1-beta	16276.2	0.315194	0.130452	2.41616	0.015685	0.0285598
PF3D7_0806500		DnaJ protein, putative	10619.3	0.314404	0.121233	2.5934	0.00950332	0.0182712
PF3D7_1118600	MYST	histone acetyltransferase MYST	5538.45	0.301592	0.131609	2.29158	0.0219298	0.0385948
PF3D7_1243800	WDR82	WD repeat-containing protein 82, putative	21072.9	0.298995	0.129282	2.31274	0.0207368	0.0367604
PF3D7_0706300		conserved Plasmodium protein, unknown function	9321.24	0.291422	0.12942	2.25176	0.0243374	0.042332
PF3D7_0907900	PDF	peptide deformylase	7525.01	0.286967	0.12947	2.21648	0.0266583	0.0459898
PF3D7_0513600		deoxyribodipyrimidine photo-lyase, putative	20000.8	-0.286012	0.129945	-2.20102	0.0277348	0.0476088
PF3D7_0919000	NAPS	nucleosome assembly protein	36726.7	-0.286209	0.121044	-2.3645	0.0180546	0.0323986
PF3D7_0405400	PRPF8	pre-mRNA-processing-splicing factor 8, putative	20495.4	-0.297667	0.125089	-2.37964	0.0173297	0.0312155
PF3D7_0318200	RPB1	DNA-directed RNA polymerase II subunit RPB1	19032.2	-0.300917	0.127825	-2.35413	0.0185661	0.0332085
PF3D7_0919800		TLD domain-containing protein	12750.6	-0.301211	0.137497	-2.19068	0.028475	0.0487234
PF3D7_0618200		conserved protein, unknown function	7445.14	-0.305667	0.138549	-2.20621	0.0273696	0.0470571
PF3D7_1132600	PRP38A	pre-mRNA-splicing factor 38A, putative	5294.53	-0.306472	0.132532	-2.31244	0.0207535	0.0367778
PF3D7_0824800		conserved Plasmodium membrane protein, unknown function	6689.38	-0.310761	0.133722	-2.32394	0.0201286	0.0357887
PF3D7_1230900	RIO1	serine/threonine protein kinase RIO1, putative	5433.77	-0.315549	0.136969	-2.3038	0.0212341	0.037535
PF3D7_0924500		conserved Plasmodium membrane protein, unknown function	5953.63	-0.315942	0.128247	-2.46353	0.0137575	0.0253599
PF3D7_0931500		conserved Plasmodium protein, unknown function	12763.8	-0.318259	0.143163	-2.22305	0.0262125	0.0452854
PF3D7_1315800	MYB1	transcription factor MYB1	3419.35	-0.318393	0.141488	-2.25031	0.0244292	0.0424781
PF3D7_1470000	ATG12	autophagy-related protein 12, putative	3301.44	-0.320097	0.140983	-2.27046	0.0231794	0.0405281
PF3D7_0419600	RANBP1	ran-specific GTPase-activating protein 1, putative	21149.7	-0.324153	0.123903	-2.61619	0.0088918	0.0172126
PF3D7_0731200		Plasmodium exported protein, unknown function	3300.24	-0.324679	0.139878	-2.32115	0.0202786	0.0360165
PF3D7_0205400		PCI domain-containing protein, putative	7976.63	-0.325241	0.139202	-2.33647	0.0194665	0.0347149
PF3D7_0613700		syntaxin-binding protein, putative	8007.76	-0.325556	0.131049	-2.48424	0.0129829	0.0241561
PF3D7_0618800		heptatricopeptide repeat-containing protein, putative	2874.32	-0.327888	0.148776	-2.2039	0.0275314	0.0472898
PF3D7_1031600	GEXP15	protein GEXP15	7374.09	-0.328118	0.144494	-2.27081	0.0231587	0.040505
PF3D7_0930100		heptatricopeptide repeat-containing protein, putative	3261.45	-0.328656	0.135027	-2.43401	0.0149328	0.0273106
PF3D7_1136900	SUB2	subtilisin-like protease 2	14027.3	-0.32882	0.140115	-2.34679	0.018936	0.0338477
PF3D7_1416300		N-acyl-phosphatidylethanolamine-hydrolyzing phospholipase D, putative	3320.13	-0.331523	0.137948	-2.40325	0.0162502	0.0295088
PF3D7_0414800		conserved Plasmodium protein, unknown function	8236.65	-0.332685	0.149688	-2.22252	0.0262479	0.0453319
PF3D7_0930400		zinc finger protein, putative	15921.3	-0.333012	0.132206	-2.51889	0.0117725	0.0221135
PF3D7_0824400	NT2	nucleoside transporter 2	7370.34	-0.333031	0.132375	-2.51582	0.0118756	0.0222734
PF3D7_1227700	KIC2	protein KIC2	13330.6	-0.334726	0.127062	-2.63435	0.00842994	0.0164073
PF3D7_0524900	TYW1	S-adenosyl-L-methionine-dependent tRNA 4-demethylwyosine synthase, putative	4407.72	-0.33488	0.139238	-2.40508	0.0161688	0.0293909
PF3D7_1253000	GECO	gametocyte erythrocyte cytosolic protein	23387.4	-0.336077	0.133575	-2.51601	0.0118692	0.0222692
PF3D7_1013100	UTP13	U3 small nucleolar RNA-associated protein 13, putative	3689.56	-0.336115	0.135923	-2.47283	0.013405	0.0248038
PF3D7_1303500	NHE	sodium/hydrogen exchanger	22327.8	-0.336338	0.135543	-2.48142	0.0130862	0.0243314
PF3D7_0811000	CUL1	cullin-1, putative	5177.06	-0.33692	0.141429	-2.38226	0.0172068	0.0310392
PF3D7_0424100	RH5	reticulocyte binding protein homologue 5	7720.9	-0.337596	0.154306	-2.18784	0.0286815	0.0489987
PF3D7_0914300		met-10+ like protein, putative	2442.49	-0.342505	0.153019	-2.23832	0.0252001	0.0437334
PF3D7_1363100		conserved Plasmodium protein, unknown function	2532.83	-0.343534	0.137458	-2.4992	0.0124474	0.0232485
PF3D7_0209800	UAP56	ATP-dependent RNA helicase UAP56	46069.6	-0.345054	0.122579	-2.81495	0.00487847	0.0100183
PF3D7_0731000		non-coding RNA	6173.18	-0.345976	0.15651	-2.21057	0.0270659	0.0465947
PF3D7_1331200		conserved Plasmodium protein, unknown function	6568.48	-0.346699	0.154729	-2.24068	0.0250469	0.0435097
PF3D7_1207600	MiaA	tRNA dimethylallyltransferase, putative	3326.16	-0.346714	0.144387	-2.40128	0.0163377	0.0296276
PF3D7_1443400	WLP1	WD repeat-containing protein	7666.95	-0.347054	0.137683	-2.52067	0.011713	0.0220379
PF3D7_0208200	KRR1	KRR1 small subunit processome component, putative	3322.16	-0.348969	0.145187	-2.40359	0.0162351	0.0294915
PF3D7_1342300		tetratricopeptide repeat protein, putative	1989.72	-0.349533	0.145185	-2.40749	0.0160626	0.0292176
PF3D7_0304500	GLP1	1-cys-glutaredoxin-like protein-1	3924.4	-0.350641	0.147206	-2.38197	0.0172203	0.0310393
PF3D7_1229000		conserved Plasmodium membrane protein, unknown function	3129.54	-0.351566	0.147224	-2.38797	0.0169419	0.0306404
PF3D7_0607600	SAS6	spindle assembly abnormal protein 6, putative	11819	-0.352474	0.140875	-2.50204	0.012348	0.0230789
PF3D7_1445600		RNA-binding protein, putative	10452.8	-0.353557	0.133855	-2.64134	0.00825791	0.016131
PF3D7_0720000	CSL4	exosome complex component CSL4, putative	2707.58	-0.354785	0.155214	-2.28577	0.0222675	0.0391505
PF3D7_0905400	RhopH3	high molecular weight rhoptry protein 3	225526	-0.355322	0.131392	-2.70428	0.0068452	0.0136345
PF3D7_0419400		conserved Plasmodium protein, unknown function	2888.43	-0.356506	0.159284	-2.23818	0.0252091	0.0437349
PF3D7_0927600		RNA-binding protein, putative	13805.4	-0.357046	0.13824	-2.5828	0.00980021	0.018815
PF3D7_1252100	RON3	rhoptry neck protein 3	26293	-0.357331	0.149959	-2.38286	0.0171789	0.0310168
PF3D7_1440100		cohesin complex subunit, putative	6843.89	-0.357941	0.153676	-2.32919	0.019849	0.0353384
PF3D7_1453900		conserved Plasmodium protein, unknown function	3156.49	-0.358223	0.150139	-2.38594	0.0170354	0.0307992
PF3D7_0424500	FIKK4.1	serine/threonine protein kinase, FIKK family	2807.71	-0.358245	0.141213	-2.53691	0.0111834	0.0211528
PF3D7_0828200		leucine--tRNA ligase, putative	6779.02	-0.359376	0.144719	-2.48326	0.0130184	0.0242139
PF3D7_1231600	PRP2	pre-mRNA-splicing factor ATP-dependent RNA helicase PRP2, putative	5616.04	-0.360366	0.155682	-2.31476	0.0206259	0.0365879
PF3D7_1437000		N-acetyltransferase, GNAT family, putative	4444.52	-0.36088	0.145738	-2.47622	0.0132781	0.0246115
PF3D7_0924300	TPK	thiamine pyrophosphokinase	2913.41	-0.361357	0.145924	-2.47635	0.0132735	0.0246115
PF3D7_1130000	PAGM	phosphoacetylglucosamine mutase, putative	3850.61	-0.362746	0.147438	-2.46033	0.0138808	0.0255609
PF3D7_0916900		zinc finger protein, putative	6327.25	-0.363471	0.149861	-2.42538	0.0152925	0.0279019
PF3D7_1331600	DEH	3-hydroxyacyl-CoA dehydratase DEH	8194.59	-0.36474	0.164391	-2.21874	0.0265047	0.045746
PF3D7_1337800	CDPK5	calcium-dependent protein kinase 5	15851.6	-0.364779	0.138373	-2.6362	0.00838412	0.0163359
PF3D7_0602600		SAC3 domain-containing protein, putative	3614.34	-0.365013	0.149515	-2.44131	0.0146341	0.0268009
PF3D7_1123600		RAP protein, putative	3721.57	-0.365076	0.144937	-2.51885	0.0117738	0.0221135
PF3D7_1404800		conserved Plasmodium protein, unknown function	15686	-0.366371	0.161287	-2.27155	0.0231135	0.0404524
PF3D7_0306100		conserved Plasmodium protein, unknown function	4052.54	-0.366953	0.143659	-2.55433	0.0106392	0.0202446
PF3D7_0717400		queuine tRNA-ribosyltransferase, putative	4558.66	-0.36701	0.128594	-2.85402	0.00431693	0.00894387
PF3D7_0405000	DDX51	ATP-dependent RNA helicase DDX51, putative	5399.76	-0.367022	0.140324	-2.61554	0.0089087	0.0172329
PF3D7_0930400.2		zinc finger protein, putative	5886.51	-0.367043	0.152777	-2.40247	0.0162846	0.0295613
PF3D7_1037600	XPB	TFIIH basal transcription factor complex helicase XPB subunit, putative	5691.86	-0.36773	0.13921	-2.64155	0.00825284	0.016127
PF3D7_1029900		ORC3 domain-containing protein, putative	48778.9	-0.36805	0.165836	-2.21936	0.0264623	0.0456875
PF3D7_0935390		gdv1 antisense RNA	9171.53	-0.368797	0.143553	-2.56907	0.0101971	0.0194819
PF3D7_0220500		Plasmodium exported protein (hyp2), unknown function	4699.69	-0.369104	0.16053	-2.29928	0.0214891	0.0378936
PF3D7_1016000		conserved Plasmodium protein, unknown function	5788.84	-0.371176	0.158573	-2.34072	0.0192466	0.034357
PF3D7_1003400		conserved Plasmodium protein, unknown function	7606.8	-0.371475	0.146419	-2.53706	0.0111788	0.0211514
PF3D7_1145200		serine/threonine protein kinase, putative	28946	-0.371529	0.155968	-2.38208	0.0172151	0.0310393
PF3D7_1432200		conserved Plasmodium protein, unknown function	1720.09	-0.372993	0.167662	-2.22467	0.0261033	0.0451403
PF3D7_1427200	Sel4	selenoprotein	1924.49	-0.373502	0.149272	-2.50216	0.0123439	0.0230789
PF3D7_0417800	CRK1	cdc2-related protein kinase 1	5397.78	-0.374966	0.1458	-2.57179	0.0101175	0.0193603
PF3D7_1125200		ubiquitin-like domain-containing protein, putative	1990.46	-0.37527	0.171941	-2.18256	0.0290685	0.0495809
PF3D7_1006700		conserved Plasmodium protein, unknown function	3261.49	-0.375538	0.163185	-2.3013	0.0213747	0.0377044
PF3D7_1136600		conserved Plasmodium protein, unknown function	5766.53	-0.376463	0.153363	-2.45473	0.0140991	0.0259184
PF3D7_1343300		CDT1-like protein, putative	14442.8	-0.376921	0.15499	-2.4319	0.0150198	0.027451
PF3D7_1128900		conserved protein, unknown function	11362.2	-0.377404	0.1481	-2.54831	0.0108246	0.0205538
PF3D7_1433700		conserved Plasmodium protein, unknown function	8241.59	-0.377459	0.136205	-2.77126	0.005584	0.0113242
PF3D7_0714300	DHHC4	palmitoyltransferase DHHC4, putative	5378.53	-0.377503	0.147428	-2.5606	0.0104493	0.0199045
PF3D7_1020400	RCM1	rRNA (cytosine-C(5))-methyltransferase, putative	1470.42	-0.377996	0.172038	-2.19717	0.0280086	0.0480327
PF3D7_1434300	HOP	Hsp70/Hsp90 organizing protein	23803	-0.378453	0.128076	-2.9549	0.00312769	0.00667059
PF3D7_1357400		conserved Plasmodium protein, unknown function	4348.39	-0.380744	0.150519	-2.52955	0.0114209	0.0215412
PF3D7_0601900		conserved Plasmodium protein, unknown function	4974.46	-0.3814	0.142591	-2.67478	0.00747793	0.0147578
PF3D7_0616200	NDC80	kinetochore protein NDC80, putative	9890.7	-0.38195	0.124304	-3.0727	0.00212132	0.00468823
PF3D7_1401200		Plasmodium exported protein, unknown function	5371.47	-0.382036	0.146638	-2.6053	0.00917942	0.0176928
PF3D7_0316500	NUF2	kinetochore protein NUF2, putative	7695.6	-0.382879	0.129126	-2.96516	0.00302528	0.00647792
PF3D7_0405500		conserved Plasmodium protein, unknown function	2268.21	-0.384288	0.165487	-2.32216	0.0202242	0.0359467
PF3D7_0630900	HAS1	ATP-dependent RNA helicase HAS1	2082.16	-0.384634	0.173539	-2.21641	0.0266631	0.0459898
PF3D7_0215300	ACS8	acyl-CoA synthetase	1583.15	-0.384803	0.164985	-2.33235	0.0196824	0.0350534
PF3D7_0604100	SIP2	AP2 domain transcription factor	13749.8	-0.384813	0.161048	-2.38943	0.0168745	0.0305392
PF3D7_1244700		conserved protein, unknown function	8852.32	-0.384922	0.175087	-2.19847	0.0279159	0.047889
PF3D7_1145500	ABCB3	ABC transporter B family member 3, putative	2833.75	-0.385439	0.147737	-2.60895	0.00908213	0.0175368
PF3D7_1320000	GP1	golgi protein 1	8151.05	-0.38663	0.157336	-2.45735	0.0139968	0.0257656
PF3D7_0820000	SRCAP	Snf2-related CBP activator, putative	7298.28	-0.387565	0.139492	-2.77841	0.00546251	0.0111072
PF3D7_1033500	WDR70	WD repeat-containing protein 70, putative	3378.45	-0.388091	0.144807	-2.68007	0.00736077	0.014548
PF3D7_0512500		conserved Plasmodium protein, unknown function	1857.35	-0.389428	0.163935	-2.3755	0.0175253	0.0315467
PF3D7_0919200		PPPDE peptidase, putative	20463.3	-0.390855	0.138883	-2.81428	0.00488859	0.0100322
PF3D7_0612600	NCS6	cytoplasmic tRNA 2-thiolation protein 1, putative	6881.13	-0.391969	0.124143	-3.1574	0.00159185	0.00359658
PF3D7_0724700	BDP6	bromodomain protein 6, putative	8478.65	-0.393165	0.160496	-2.44969	0.0142979	0.0262568
PF3D7_0917300		conserved protein, unknown function	2780.8	-0.39384	0.164384	-2.39585	0.0165818	0.0300398
PF3D7_1347700	ECT	ethanolamine-phosphate cytidylyltransferase	9726.14	-0.394083	0.150925	-2.61111	0.0090249	0.0174388
PF3D7_1033600	CEF1	pre-mRNA-splicing factor CEF1, putative	8307.85	-0.39459	0.137126	-2.87758	0.00400736	0.00837379
PF3D7_0936300	REX3	ring-exported protein 3	6218.08	-0.395325	0.155671	-2.53948	0.0111018	0.0210205
PF3D7_1366700		conserved Plasmodium protein, unknown function	5321.66	-0.396722	0.179026	-2.216	0.0266912	0.0460234
PF3D7_1319700		protein phosphatase PP2A regulatory subunit A, putative	1560.45	-0.398573	0.168621	-2.36372	0.0180923	0.0324368
PF3D7_0708500		heat shock protein 86 family protein	4963.75	-0.398907	0.151522	-2.63266	0.00847183	0.016471
PF3D7_1405800	BOP1	ribosome biogenesis protein BOP1, putative	9529.04	-0.399053	0.135685	-2.94103	0.00327124	0.00696015
PF3D7_1149100		Plasmodium exported protein, unknown function	26925.6	-0.399054	0.136856	-2.91586	0.00354704	0.00749052
PF3D7_0933100		conserved Plasmodium protein, unknown function	770.237	-0.399124	0.176547	-2.26072	0.0237768	0.0414646
PF3D7_0709300	MED14	mediator of RNA polymerase II transcription subunit 14, putative	2777.51	-0.399354	0.155289	-2.57169	0.0101203	0.0193603
PF3D7_1411000.2		conserved Plasmodium protein, unknown function	9144.41	-0.400466	0.149209	-2.68392	0.00727644	0.014392
PF3D7_1338200	RPL6	60S ribosomal protein L6, putative	47275.6	-0.400497	0.131881	-3.03682	0.00239091	0.00522805
PF3D7_1333900		conserved Plasmodium protein, unknown function	1360.82	-0.400519	0.176612	-2.26779	0.0233423	0.0407863
PF3D7_1251600		conserved Plasmodium protein, unknown function	3931.21	-0.4007	0.133897	-2.99261	0.00276602	0.00596562
PF3D7_1463700	CYC1	cyclin 1	2677.33	-0.400701	0.162231	-2.46994	0.0135134	0.0249557
PF3D7_0525700		conserved protein, unknown function	5680.62	-0.400785	0.181595	-2.20702	0.0273126	0.0469742
PF3D7_0507700	NPL4	nuclear protein localization protein 4, putative	6294.73	-0.400871	0.138767	-2.8888	0.00386719	0.00811518
PF3D7_1469000	IF1	translation initiation factor IF-1	1616.78	-0.402407	0.178201	-2.25817	0.0239352	0.0417272
PF3D7_0522800	BUD31	pre-mRNA-splicing factor BUD31, putative	2402.12	-0.403306	0.164499	-2.45173	0.0142171	0.0261174
PF3D7_0414700		GTP-binding protein, putative	6697.09	-0.406115	0.133627	-3.03917	0.0023723	0.00519158
PF3D7_1122400		conserved Plasmodium protein, unknown function	3746.63	-0.406439	0.14517	-2.79974	0.00511437	0.0104587
PF3D7_0410800		conserved Plasmodium protein, unknown function	22450	-0.40775	0.132197	-3.08441	0.0020396	0.00452251
PF3D7_0905200		mitochondrial carrier protein, putative	2234.28	-0.408619	0.180549	-2.26321	0.0236229	0.0412229
PF3D7_1124900	RPL35	60S ribosomal protein L35, putative	44196.8	-0.408758	0.183628	-2.22601	0.0260137	0.0450143
PF3D7_1036500		conserved Plasmodium protein, unknown function	8287.05	-0.408804	0.163569	-2.49928	0.0124445	0.0232485
PF3D7_0504000	ATPase3	cation transporting P-ATPase	10586.8	-0.40931	0.140019	-2.92325	0.00346401	0.00733249
PF3D7_1305100	AMR3	protein AMR3	3286.08	-0.409471	0.167004	-2.45186	0.0142122	0.0261173
PF3D7_0321600	DDX42	ATP-dependent RNA helicase DDX42, putative	10439.6	-0.410129	0.12713	-3.22607	0.00125503	0.00291032
PF3D7_0809900	JmjC1	JmjC domain-containing protein 1, putative	2326.34	-0.410384	0.179596	-2.28504	0.0223106	0.0392044
PF3D7_0719900		conserved Plasmodium membrane protein, unknown function	7737.46	-0.411184	0.152349	-2.69896	0.00695568	0.0138186
PF3D7_0402400	GEXP18	Plasmodium exported protein, unknown function	28549.3	-0.411436	0.159422	-2.58079	0.00985742	0.0189181
PF3D7_1461100		conserved Plasmodium protein, unknown function	3729.05	-0.41161	0.155128	-2.65337	0.00796935	0.0156357
PF3D7_0616900		conserved Plasmodium protein, unknown function	3866.56	-0.411703	0.15584	-2.64183	0.00824583	0.0161192
PF3D7_0322700		conserved Plasmodium protein, unknown function	4494.22	-0.41217	0.183378	-2.24766	0.0245979	0.0427575
PF3D7_0209500		conserved Plasmodium protein, unknown function	3319.78	-0.412578	0.160719	-2.56708	0.010256	0.0195779
PF3D7_1326200		conserved Plasmodium protein, unknown function	5701.19	-0.412876	0.143564	-2.87591	0.00402866	0.00841411
PF3D7_0313000		conserved Plasmodium protein, unknown function	2517.36	-0.413491	0.157692	-2.62215	0.00873778	0.0169389
PF3D7_0803500		AAA family ATPase, putative	4569.09	-0.41353	0.157271	-2.62941	0.00855337	0.0166114
PF3D7_1013000		zinc finger protein, putative	1927.2	-0.41363	0.160626	-2.57511	0.0100208	0.0192042
PF3D7_0924700	SF3A3	splicing factor 3A subunit 3, putative	3411.5	-0.414574	0.139899	-2.96338	0.00304284	0.00651292
PF3D7_1355700	NIF3	NLI interacting factor-like phosphatase, putative	7656.75	-0.415235	0.157939	-2.62908	0.00856161	0.0166214
PF3D7_1414500	ABCk2	atypical protein kinase, ABC-1 family, putative	12961.9	-0.41538	0.165732	-2.50633	0.012199	0.0228323
PF3D7_1419000		conserved Plasmodium protein, unknown function	9423	-0.416145	0.186705	-2.22889	0.0258211	0.0447099
PF3D7_1367700	AlaRS	alanine--tRNA ligase	10325.7	-0.416207	0.127878	-3.25472	0.00113505	0.00265969
PF3D7_0829000		conserved Plasmodium membrane protein, unknown function	3920.62	-0.416347	0.153009	-2.72107	0.00650716	0.0130358
PF3D7_1327700	UPF3B	regulator of nonsense transcripts 3B, putative	4193.73	-0.417936	0.153995	-2.71396	0.00664846	0.013292
PF3D7_0302900		exportin-1, putative	15133.2	-0.418212	0.134083	-3.11905	0.00181434	0.00406165
PF3D7_1248700		conserved protein, unknown function	16817.4	-0.418537	0.171109	-2.44602	0.0144441	0.0264891
PF3D7_0829400		prolyl 4-hydroxylase subunit alpha, putative	5554.06	-0.418798	0.168792	-2.48115	0.0130959	0.0243411
PF3D7_1425700		vacuolar ER assembly factor VMA12, putative	5325.09	-0.419487	0.155385	-2.69966	0.00694093	0.0137996
PF3D7_1131000		RNA-binding protein s1, putative	2200.67	-0.419953	0.152604	-2.7519	0.00592499	0.0119704
PF3D7_0907600		translation initiation factor SUI1, putative	2444.25	-0.420625	0.165403	-2.54303	0.0109896	0.0208229
PF3D7_1331500		conserved Plasmodium protein, unknown function	5881.64	-0.421793	0.140055	-3.01162	0.00259859	0.00564308
PF3D7_0218400	DDX47	ATP-dependent RNA helicase DDX47, putative	1882.14	-0.421846	0.159864	-2.63878	0.00832056	0.0162357
PF3D7_0928800		serine/threonine protein kinase, putative	3208.4	-0.422065	0.16738	-2.5216	0.0116821	0.0219952
PF3D7_1327600	NMNAT	nicotinamide/nicotinic acid mononucleotide adenylyltransferase	3916.67	-0.422255	0.167546	-2.52023	0.0117278	0.0220502
PF3D7_1012000		RING zinc finger protein, putative	11576.5	-0.423094	0.148184	-2.85519	0.00430107	0.00892352
PF3D7_1337000	45200	mitochondrial intermediate peptidase, putative	1601.27	-0.42349	0.187686	-2.25637	0.0240475	0.0418958
PF3D7_1445100		histidine--tRNA ligase, putative	3488.15	-0.423959	0.147648	-2.87142	0.00408634	0.00851215
PF3D7_1013300		conserved Plasmodium protein, unknown function	1406.99	-0.425111	0.166948	-2.54637	0.0108849	0.0206532
PF3D7_0707800		RAP protein, putative	5078.22	-0.425651	0.152912	-2.78364	0.00537527	0.0109422
PF3D7_1209500	PDEalpha	cGMP-specific 3',5'-cyclic phosphodiesterase alpha	3477.6	-0.426028	0.142783	-2.98375	0.00284738	0.00612632
PF3D7_0205700.2		RNA-binding protein, putative	6355.87	-0.426235	0.158253	-2.69338	0.00707316	0.0140342
PF3D7_1432900		SF-assemblin, putative	1678.29	-0.426324	0.178802	-2.38433	0.0171102	0.0309135
PF3D7_1456000	AP2-HC	AP2 domain transcription factor AP2-HC	6254.38	-0.426384	0.159188	-2.6785	0.00739535	0.0146056
PF3D7_1249900	KsgA2	ribosomal RNA small subunit methyltransferase A2, putative	9321.33	-0.426396	0.144328	-2.95436	0.0031332	0.00667968
PF3D7_1231100	RAB2	ras-related protein Rab-2	9482.93	-0.426548	0.150575	-2.83279	0.00461442	0.00951612
PF3D7_1245100	KLP8	kinesin-13, putative	1451.85	-0.426708	0.168774	-2.52828	0.0114622	0.0216039
PF3D7_1335700	COG3	conserved oligomeric Golgi complex subunit 3, putative	3697.66	-0.426728	0.182392	-2.33962	0.0193036	0.0344473
PF3D7_1306900	SNRPA	U1 small nuclear ribonucleoprotein A, putative	3679.48	-0.42682	0.157554	-2.70904	0.00674772	0.0134653
PF3D7_1359400	CELF1	CUGBP Elav-like family member 1	18924.9	-0.427302	0.167609	-2.54939	0.0107911	0.0204974
PF3D7_0822900	PIC2	PhIL1-interacting candidate PIC2	28761.4	-0.428053	0.152101	-2.81426	0.00488899	0.0100322
PF3D7_1320100	ClpS	ATP-dependent Clp protease adapter protein ClpS	4032.89	-0.428109	0.158482	-2.70131	0.00690673	0.0137418
PF3D7_1014900	KIC8	protein KIC8	11440.3	-0.42826	0.193724	-2.21067	0.0270586	0.0465947
PF3D7_0319500		RNA-binding protein, putative	5628.54	-0.428514	0.132416	-3.23612	0.00121168	0.00281991
PF3D7_1457900		conserved Plasmodium protein, unknown function	6564.56	-0.428538	0.195998	-2.18644	0.0287837	0.0491576
PF3D7_1128500	mHCF101	Fe-S cluster assembly factor HCF101, putative	2000.34	-0.428617	0.162126	-2.64373	0.00819989	0.0160411
PF3D7_0908500		conserved Plasmodium protein, unknown function	8465.7	-0.428808	0.135179	-3.17214	0.0015132	0.00344206
PF3D7_0308500		activator of Hsp90 ATPase, putative	10358.5	-0.429292	0.167915	-2.5566	0.0105701	0.0201202
PF3D7_0624100		conserved protein, unknown function	4927.31	-0.42954	0.133996	-3.20562	0.00134773	0.00310116
PF3D7_0110600	PIP5K	phosphatidylinositol-4-phosphate 5-kinase	11928.8	-0.429551	0.18131	-2.36915	0.0178288	0.0320418
PF3D7_1110800		conserved Plasmodium protein, unknown function	911.761	-0.429853	0.181896	-2.36318	0.0181188	0.0324665
PF3D7_1413200		conserved Plasmodium protein, unknown function	953.245	-0.430254	0.193516	-2.22335	0.0261923	0.0452651
PF3D7_0405900	ASP	apical sushi protein	35908.7	-0.431452	0.167957	-2.56883	0.0102043	0.0194861
PF3D7_1423700		conserved Plasmodium protein, unknown function	22352.1	-0.431522	0.162895	-2.64908	0.00807113	0.015818
PF3D7_0711400	SAP18	histone deacetylase complex subunit SAP18, putative	5142.36	-0.431821	0.18473	-2.33758	0.0194091	0.034624
PF3D7_0726900	TIM50	mitochondrial import inner membrane translocase subunit TIM50, putative	1527.09	-0.432297	0.17782	-2.4311	0.0150532	0.0275027
PF3D7_0515800		BolA-like protein, putative	1264.1	-0.432305	0.17344	-2.49253	0.0126835	0.0236603
PF3D7_1247200		conserved protein, unknown function	2155.45	-0.432843	0.164722	-2.62771	0.00859606	0.0166762
PF3D7_1306000		conserved Plasmodium protein, unknown function	2405.21	-0.433125	0.195996	-2.20986	0.0271146	0.0466636
PF3D7_1143100	AP2-O	AP2 domain transcription factor AP2-O	15839.8	-0.433522	0.188283	-2.30251	0.0213067	0.0376201
PF3D7_1119800	ASF1	alternative splicing factor ASF-1, putative	2278.05	-0.433592	0.144127	-3.0084	0.00262625	0.00570084
PF3D7_1421600		conserved Plasmodium protein, unknown function	6227.85	-0.434536	0.138176	-3.14479	0.00166205	0.00374887
PF3D7_0317500	EG5	kinesin-5	2130.41	-0.435266	0.18644	-2.33462	0.0195634	0.0348762
PF3D7_1440900		conserved Plasmodium protein, unknown function	5379.49	-0.435466	0.145267	-2.9977	0.00272021	0.00588337
PF3D7_1409600		histidine phosphatase, putative	2141.81	-0.435804	0.168206	-2.5909	0.00957249	0.0183976
PF3D7_1224800		conserved protein, unknown function	1415.41	-0.435982	0.183015	-2.38222	0.0172087	0.0310392
PF3D7_1212300		WD repeat-containing protein, putative	2290.02	-0.436021	0.164711	-2.64719	0.00811634	0.015895
PF3D7_0422500	BRR2	pre-mRNA-splicing helicase BRR2, putative	5631.82	-0.436395	0.159181	-2.74151	0.00611575	0.0123141
PF3D7_1310500	EMC7	ER membrane protein complex subunit 7, putative	1857.85	-0.436601	0.169948	-2.56903	0.0101984	0.0194819
PF3D7_1302500		AAA domain-containing protein, putative	4202.65	-0.437163	0.135669	-3.22229	0.00127172	0.0029414
PF3D7_0516400	PhLP1	phosducin-like protein 1, putative	3263.3	-0.437904	0.153274	-2.85701	0.00427659	0.00888077
PF3D7_1323900		protein BCP1, putative	5421.89	-0.438746	0.15022	-2.9207	0.00349248	0.0073811
PF3D7_1447200		conserved protein, unknown function	6552.43	-0.439022	0.154174	-2.84758	0.00440533	0.00911295
PF3D7_1338100	RPN3	26S proteasome regulatory subunit RPN3, putative	28846.3	-0.439465	0.125073	-3.51368	0.000441946	0.00113197
PF3D7_1355800	SF3B5	splicing factor 3B subunit 5, putative	994.42	-0.439933	0.196257	-2.24161	0.0249865	0.0434188
PF3D7_1107800	ApiAP2	AP2 domain transcription factor, putative	49172.8	-0.439964	0.163193	-2.69597	0.00701841	0.0139381
PF3D7_1328600		conserved Plasmodium protein, unknown function	828.106	-0.440157	0.193614	-2.27337	0.023004	0.0403002
PF3D7_1469900	MGET	protein MGET	5767.81	-0.442064	0.132902	-3.32625	0.000880216	0.00211466
PF3D7_1016200		Rab3 GTPase-activating protein non-catalytic subunit, putative	4915.75	-0.442642	0.156967	-2.81996	0.00480295	0.00987078
PF3D7_0212000		GDP-fructose:GMP antiporter, putative	3167.42	-0.442689	0.158464	-2.79363	0.00521207	0.0106423
PF3D7_1118700	MLC-B	myosin light chain B	14079.6	-0.443057	0.142134	-3.11718	0.00182591	0.00408414
PF3D7_0611300	ATPTG2	ATP synthase-associated protein, putative	2598.13	-0.443267	0.161498	-2.74473	0.0060561	0.0122077
PF3D7_0818100		zinc finger protein, putative	15329	-0.443543	0.134029	-3.30931	0.000935266	0.00223547
PF3D7_1210300		conserved Plasmodium protein, unknown function	1306.54	-0.44407	0.180319	-2.46269	0.0137898	0.0254107
PF3D7_0407800	CINCH	protein CINCH	14987	-0.445178	0.176579	-2.52112	0.0116981	0.0220175
PF3D7_0501400	FIRA	interspersed repeat antigen	10303.4	-0.445567	0.195788	-2.27576	0.0228601	0.0400743
PF3D7_0408900	KAE1	tRNA N6-adenosine threonylcarbamoyltransferase	3960.04	-0.447463	0.136822	-3.2704	0.00107396	0.00254095
PF3D7_1219000	FRM2	formin 2	11557	-0.448602	0.175382	-2.55785	0.010532	0.0200549
PF3D7_0302000	PRP46	pre-mRNA-splicing factor PRP46, putative	3670.42	-0.449491	0.140509	-3.19901	0.001379	0.00316363
PF3D7_0926500		tetratricopeptide repeat protein, putative	4703.75	-0.449905	0.162267	-2.77262	0.00556074	0.0112855
PF3D7_0212200		ribosomal protein L12, mitochondrial, putative	2759.89	-0.450355	0.145279	-3.09994	0.00193562	0.00430797
PF3D7_0522100		conserved Plasmodium protein, unknown function	3289.99	-0.450607	0.152861	-2.94783	0.00320017	0.00681702
PF3D7_0502000	VPS11	vacuolar protein sorting-associated protein 11, putative	6013.19	-0.451072	0.151863	-2.97026	0.00297548	0.00637892
PF3D7_1457700		large ribosomal subunit nuclear export factor, putative	3609.13	-0.451145	0.174397	-2.58689	0.00968475	0.0186
PF3D7_0308600	PRPF19	pre-mRNA-processing factor 19, putative	4156.16	-0.451849	0.135503	-3.33461	0.000854188	0.00206003
PF3D7_0212500		conserved Plasmodium protein, unknown function	8368.15	-0.451957	0.158493	-2.85159	0.00435007	0.00900559
PF3D7_0911600		conserved Plasmodium protein, unknown function	2545.15	-0.452282	0.152926	-2.95751	0.00310133	0.00662226
PF3D7_0415300	CRK3	cdc2-related protein kinase 3	8604.31	-0.453662	0.141368	-3.20909	0.00133157	0.00306661
PF3D7_1035500	MSP6	merozoite surface protein 6	86254.7	-0.454226	0.134511	-3.37687	0.000733153	0.00179019
PF3D7_1405400	MutS	DNA mismatch repair protein, putative	2107.68	-0.454817	0.168325	-2.70201	0.00689213	0.0137178
PF3D7_0831400		Plasmodium exported protein, unknown function	14953.6	-0.454872	0.143024	-3.1804	0.00147074	0.00335117
PF3D7_0103400		zinc-carboxypeptidase, putative	17326.4	-0.455978	0.148111	-3.07863	0.00207957	0.00459975
PF3D7_1119400		ubiquitin-protein ligase, putative	6173.31	-0.456027	0.136852	-3.33228	0.000861384	0.00207552
PF3D7_1334600	MSRP3	MSP7-like protein	5332.51	-0.456285	0.154183	-2.95937	0.00308266	0.00658763
PF3D7_1144800		conserved Plasmodium protein, unknown function	1074.38	-0.456708	0.175372	-2.60423	0.00920817	0.0177418
PF3D7_0825500	KRI1	protein KRI1, putative	5161.61	-0.457658	0.149896	-3.05317	0.00226439	0.0049798
PF3D7_1028000		methyltransferase, putative	3984.43	-0.45816	0.162912	-2.81231	0.0049187	0.0100855
PF3D7_1337700	PH2	phosphoinositide-binding protein PH2	5480.24	-0.458437	0.134661	-3.40438	0.000663149	0.00163607
PF3D7_0203100		protein kinase, putative	2437.62	-0.460124	0.171511	-2.68276	0.00730163	0.0144365
PF3D7_0317200	CRK4	cdc2-related protein kinase 4	19894.2	-0.460321	0.132043	-3.48614	0.000490043	0.0012433
PF3D7_1028400		ribosome biogenesis protein RPF2, putative	5333.11	-0.460567	0.170139	-2.707	0.00678946	0.0135385
PF3D7_1149000	Pf332	antigen 332, DBL-like protein	7929.2	-0.461112	0.180958	-2.54817	0.0108289	0.0205546
[truncated: 1,452 more rows]
