# Supplementary figures and images for: PfMORC protein regulates chromatin accessibility and transcriptional repression in the human malaria parasite, Plasmodium falciparum
Source: eLife journal article supplement (doi:10.7554/elife.92499), 2023-11-20

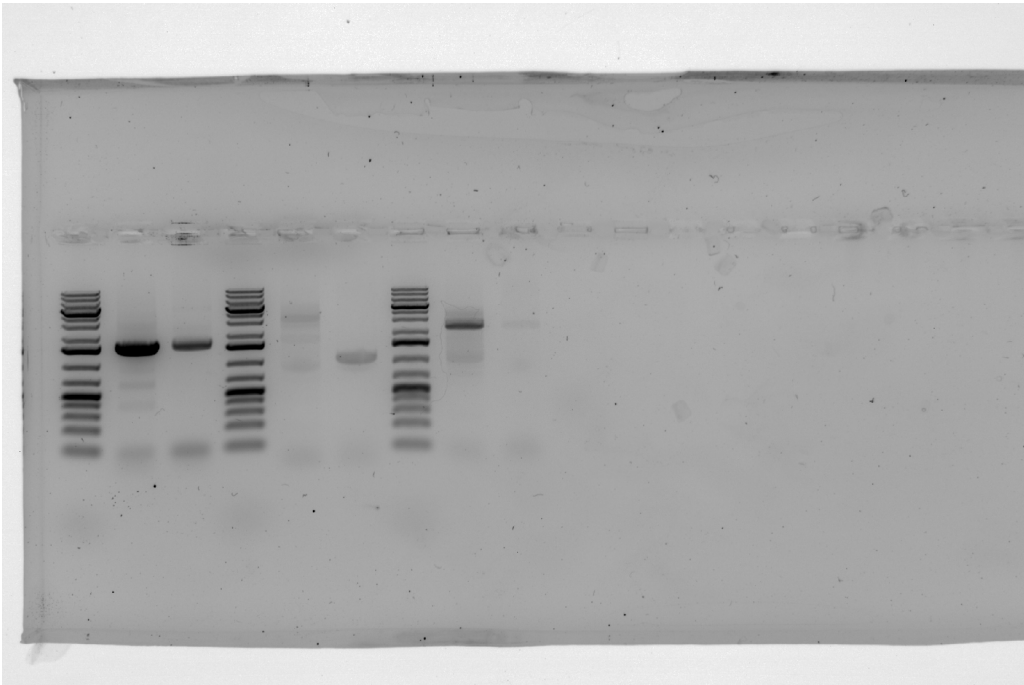

Supplement: fig1-data1 [file elife-92499-fig1-data1-v1.zip]

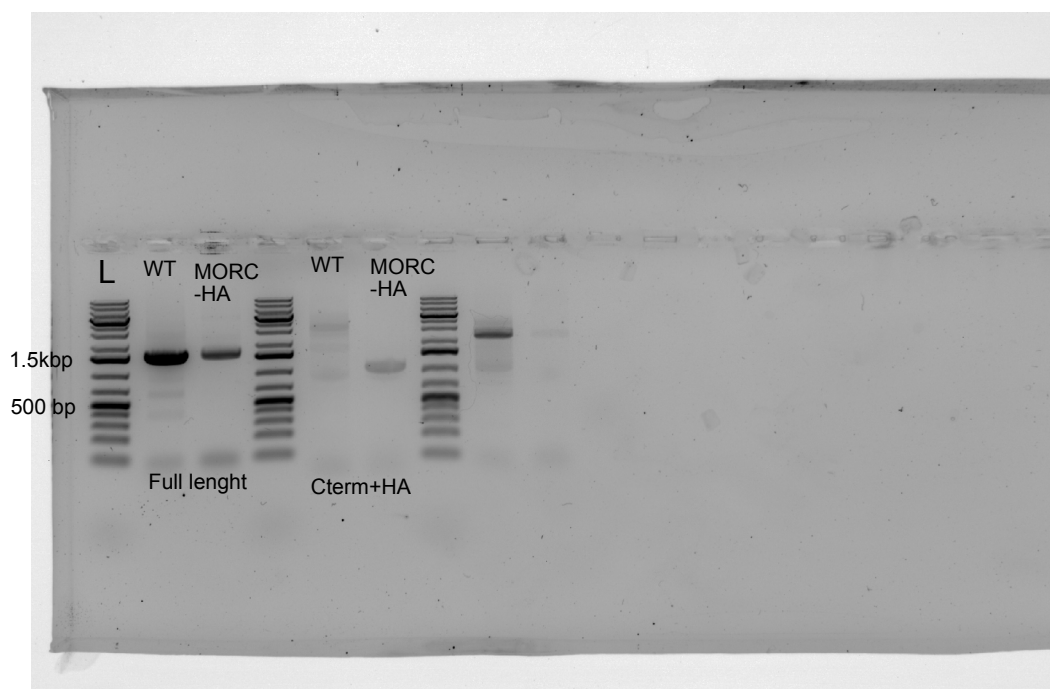

Supplement: fig1-data2 [file elife-92499-fig1-data2-v1.zip]
